# Supplementary material for: Chemical Structure-Related Drug-Like Criteria of Global Approved Drugs
Source: PubMed Central journal article supplement (PMC6273477; doi:10.3390/molecules21010075), 2016-01-12
Supplement: molecules-21-00075-s001.pdf [file molecules-21-00075-s001.pdf]

# Supplementary Materials: Chemical Structure-Related Drug-Like Criteria of Global Approved Drugs

Fei Mao <sup>1</sup>, Wei Ni <sup>1</sup>, Xiang Xu <sup>1</sup>, Hui Wang <sup>1</sup>, Jing Wang <sup>1</sup>, Min Ji <sup>1</sup> and Jian Li <sup>\*</sup>

**Table S1.** Common names, indications, CAS Registry Numbers and molecular formulas of 6891 approved drugs.

| Common Name             | Indication         | CAS Number  | Oral | Molecular Formula                                                            |
|-------------------------|--------------------|-------------|------|------------------------------------------------------------------------------|
| Abacavir                | Antiviral          | 136470-78-5 | Y    | C <sub>14</sub> H <sub>18</sub> N <sub>6</sub> O                             |
| Abafungin               | Antifungal         | 129639-79-8 |      | C <sub>21</sub> H <sub>22</sub> N <sub>4</sub> OS                            |
| Abamectin Component B1a | Anthelmintic       | 65195-55-3  |      | C <sub>48</sub> H <sub>72</sub> O <sub>14</sub>                              |
| Abamectin Component B1b | Anthelmintic       | 65195-56-4  |      | C <sub>47</sub> H <sub>70</sub> O <sub>14</sub>                              |
| Abanoquil               | Adrenergic         | 90402-40-7  |      | C <sub>22</sub> H <sub>25</sub> N <sub>3</sub> O <sub>4</sub>                |
| Abaperidone             | Antipsychotic      | 183849-43-6 |      | C <sub>25</sub> H <sub>25</sub> FN <sub>2</sub> O <sub>5</sub>               |
| Abecarnil               | Anxiolytic         | 111841-85-1 | Y    | C <sub>24</sub> H <sub>24</sub> N <sub>2</sub> O <sub>4</sub>                |
| Abiraterone             | Antineoplastic     | 154229-19-3 | Y    | C <sub>24</sub> H <sub>31</sub> NO                                           |
| Abitesartan             | Antihypertensive   | 137882-98-5 |      | C <sub>26</sub> H <sub>31</sub> N <sub>5</sub> O <sub>3</sub>                |
| Ablukast                | Bronchodilator     | 96566-25-5  |      | C <sub>28</sub> H <sub>34</sub> O <sub>8</sub>                               |
| Abunidazole             | Antifungal         | 91017-58-2  |      | C <sub>15</sub> H <sub>19</sub> N <sub>3</sub> O <sub>4</sub>                |
| Acadesine               | Cardiotonic        | 2627-69-2   | Y    | C <sub>9</sub> H <sub>14</sub> N <sub>4</sub> O <sub>5</sub>                 |
| Acamprostate            | Alcohol Deterrant  | 77337-76-9  | Y    | C <sub>5</sub> H <sub>11</sub> NO <sub>4</sub> S                             |
| Acaprazine              | Nootropic          | 55485-20-6  | Y    | C <sub>15</sub> H <sub>21</sub> Cl <sub>2</sub> N <sub>3</sub> O             |
| Acarbose                | Antidiabetic       | 56180-94-0  | Y    | C <sub>25</sub> H <sub>43</sub> NO <sub>18</sub>                             |
| Acebrochol              | Steroid            | 514-50-1    |      | C <sub>29</sub> H <sub>48</sub> Br <sub>2</sub> O <sub>2</sub>               |
| Acebutolol              | Antihypertensive   | 37517-30-9  | Y    | C <sub>18</sub> H <sub>28</sub> N <sub>2</sub> O <sub>4</sub>                |
| Acecaidine              | Antiarrhythmic     | 32795-44-1  | Y    | C <sub>15</sub> H <sub>23</sub> N <sub>3</sub> O <sub>2</sub>                |
| Acecarbromal            | Sedative           | 77-66-7     | Y    | C <sub>9</sub> H <sub>15</sub> BrN <sub>2</sub> O <sub>3</sub>               |
| Aceclidine              | Cholinergic        | 827-61-2    |      | C <sub>9</sub> H <sub>15</sub> NO <sub>2</sub>                               |
| Aceclofenac             | Antiinflammatory   | 89796-99-6  | Y    | C <sub>16</sub> H <sub>13</sub> Cl <sub>2</sub> NO <sub>4</sub>              |
| Acedapsone              | Antibiotic         | 77-46-3     |      | C <sub>16</sub> H <sub>16</sub> N <sub>2</sub> O <sub>4</sub> S              |
| Acediasulfone Sodium    | Antibiotic         | 80-03-5     |      | C <sub>14</sub> H <sub>14</sub> N <sub>2</sub> O <sub>4</sub> S              |
| Acedoben                | Nootropic          | 556-08-1    |      | C <sub>9</sub> H <sub>9</sub> NO <sub>3</sub>                                |
| Acefluranol             | Steroid            | 83282-71-7  |      | C <sub>25</sub> H <sub>26</sub> F <sub>2</sub> O <sub>8</sub>                |
| Acefylline Clobifrol    | Bronchodilator     | 70788-27-1  |      | C <sub>19</sub> H <sub>21</sub> ClN <sub>4</sub> O <sub>5</sub>              |
| Acefylline Piperazine   | Bronchodilator     | 652-37-9    |      | C <sub>9</sub> H <sub>10</sub> N <sub>4</sub> O <sub>4</sub>                 |
| Aceglatone              | Antineoplastic     | 642-83-1    |      | C <sub>10</sub> H <sub>10</sub> O <sub>8</sub>                               |
| Aceglutamide            | Antitumor          | 2490-97-3   |      | C <sub>7</sub> H <sub>12</sub> N <sub>2</sub> O <sub>4</sub>                 |
| Acemetacin              | Antiinflammatory   | 53164-05-9  | Y    | C <sub>21</sub> H <sub>18</sub> ClNO <sub>6</sub>                            |
| Acenocoumarol           | Anticoagulant      | 152-72-7    | Y    | C <sub>19</sub> H <sub>15</sub> NO <sub>6</sub>                              |
| Aceperone               | Adrenergic         | 807-31-8    |      | C <sub>24</sub> H <sub>29</sub> FN <sub>2</sub> O <sub>2</sub>               |
| Acepromazine            | Sedative           | 61-00-7     | Y    | C <sub>19</sub> H <sub>22</sub> N <sub>2</sub> OS                            |
| Aceprometazine          | Antidepressant     | 13461-01-3  | Y    | C <sub>19</sub> H <sub>22</sub> N <sub>2</sub> OS                            |
| Acetaminophen           | Analgesic          | 103-90-2    | Y    | C <sub>8</sub> H <sub>9</sub> NO <sub>2</sub>                                |
| Acetaminosalol          | Analgesic          | 118-57-0    |      | C <sub>15</sub> H <sub>13</sub> NO <sub>4</sub>                              |
| Acetanilide             | Analgesic          | 103-84-4    |      | C <sub>8</sub> H <sub>9</sub> NO                                             |
| Acetarsonic             | Antiprotozoal      | 97-44-9     |      | C <sub>8</sub> H <sub>10</sub> AsNO <sub>5</sub>                             |
| Acetazolamide           | Antiglaucoma       | 59-66-5     | Y    | C <sub>4</sub> H <sub>6</sub> N <sub>4</sub> O <sub>3</sub> S <sub>2</sub>   |
| Acetergamine            | Nootropic          | 3031-48-9   |      | C <sub>18</sub> H <sub>23</sub> N <sub>3</sub> O                             |
| Acetiromate             | Antihyperlipidemic | 2260-08-4   |      | C <sub>15</sub> H <sub>19</sub> I <sub>3</sub> O <sub>5</sub>                |
| Acetohexamide           | Antidiabetic       | 968-81-0    | Y    | C <sub>15</sub> H <sub>20</sub> N <sub>2</sub> O <sub>4</sub> S              |
| Acetohydroxamic Acid    | Antiurolithic      | 546-88-3    | Y    | C <sub>2</sub> H <sub>5</sub> NO <sub>2</sub>                                |
| Acetophenazine          | Antipsychotic      | 2751-68-0   | Y    | C <sub>23</sub> H <sub>29</sub> N <sub>3</sub> O <sub>2</sub> S              |
| Acetorphine             | Sedative           | 25333-77-1  |      | C <sub>27</sub> H <sub>35</sub> NO <sub>5</sub>                              |
| Acetosulfone Sodium     | Antibacterial      | 80-80-8     |      | C <sub>14</sub> H <sub>15</sub> N <sub>3</sub> O <sub>5</sub> S <sub>2</sub> |
| 21-Acetoxyprogesterone  | Antiinflammatory   | 566-78-9    |      | C <sub>23</sub> H <sub>34</sub> O <sub>4</sub>                               |
| Acetryptine             | Antihypertensive   | 3551-18-6   |      | C <sub>12</sub> H <sub>14</sub> N <sub>2</sub> O                             |
| Acetyl Strophanthidin   | Cardiotonic        | 60-38-8     |      | C <sub>25</sub> H <sub>34</sub> O <sub>7</sub>                               |
| Acetylcholine           | Cholinergic        | 51-84-3     |      | C <sub>7</sub> H <sub>16</sub> NO <sub>2</sub> <sup>+</sup>                  |
| Acetylcysteine          | Expectorant        | 616-91-1    | Y    | C <sub>3</sub> H <sub>9</sub> NO <sub>3</sub> S                              |
| Acetyldigitoxin         | Cardiotonic        | 1111-39-3   | Y    | C <sub>43</sub> H <sub>66</sub> O <sub>14</sub>                              |
| Acetyl-L-Leucine        | Antiemetic         | 1188-21-2   |      | C <sub>8</sub> H <sub>15</sub> NO <sub>3</sub>                               |
| Acexamic Acid           | Antiinflammatory   | 57-08-9     |      | C <sub>8</sub> H <sub>15</sub> NO <sub>3</sub>                               |
| Acifran                 | Antihyperlipidemic | 72420-38-3  |      | C <sub>12</sub> H <sub>10</sub> O <sub>4</sub>                               |
| Acipimox                | Antihyperlipidemic | 51037-30-0  | Y    | C <sub>6</sub> H <sub>6</sub> N <sub>2</sub> O <sub>3</sub>                  |

Table S1. Cont.

| Common Name                 | Indication                | CAS Number  | Oral | Molecular Formula                                                                                                |
|-----------------------------|---------------------------|-------------|------|------------------------------------------------------------------------------------------------------------------|
| Acitazanostat               | Bronchodilator            | 114607-46-4 |      | C <sub>9</sub> H <sub>7</sub> N <sub>5</sub> O <sub>3</sub>                                                      |
| Acitemate                   | Antineoplastic            | 101197-99-3 |      | C <sub>14</sub> H <sub>18</sub> N <sub>2</sub> O <sub>5</sub>                                                    |
| Acitretin                   | Dermatologic              | 55079-83-9  | Y    | C <sub>21</sub> H <sub>26</sub> O <sub>3</sub>                                                                   |
| Acivicin                    | Antineoplastic            | 42228-92-2  |      | C <sub>5</sub> H <sub>7</sub> ClN <sub>2</sub> O <sub>3</sub>                                                    |
| Aclantate                   | Antiinflammatory          | 39633-62-0  |      | C <sub>15</sub> H <sub>14</sub> ClNO <sub>4</sub> S                                                              |
| Aclarubicin                 | Antineoplastic            | 57576-44-0  |      | C <sub>42</sub> H <sub>53</sub> NO <sub>15</sub>                                                                 |
| Aclatonium Napadisilate     | Cholinergic               | 55077-30-0  |      | C <sub>10</sub> H <sub>20</sub> NO <sub>4</sub> .1/2C <sub>10</sub> H <sub>6</sub> O <sub>6</sub> S <sub>2</sub> |
| Acodazole                   | Antineoplastic            | 79152-85-5  |      | C <sub>20</sub> H <sub>19</sub> N <sub>5</sub> O                                                                 |
| Acolbifene                  | Antineoplastic            | 182167-02-8 |      | C <sub>29</sub> H <sub>31</sub> NO <sub>4</sub>                                                                  |
| Aconiazide                  | Antibiotic                | 13410-86-1  |      | C <sub>15</sub> H <sub>13</sub> N <sub>3</sub> O <sub>4</sub>                                                    |
| Aconitine                   | Analgesic                 | 302-27-2    |      | C <sub>34</sub> H <sub>47</sub> NO <sub>11</sub>                                                                 |
| Acotiamide                  | Gastroprokinetic          | 185106-16-5 | Y    | C <sub>21</sub> H <sub>30</sub> N <sub>4</sub> O <sub>5</sub> S                                                  |
| Acoxatrine                  | Vasodilator               | 748-44-7    |      | C <sub>23</sub> H <sub>28</sub> N <sub>2</sub> O <sub>3</sub>                                                    |
| Acreozast                   | Bronchodilator            | 123548-56-1 |      | C <sub>15</sub> H <sub>14</sub> ClN <sub>3</sub> O <sub>6</sub>                                                  |
| Acridorex                   | Gastroprokinetic          | 47487-22-9  |      | C <sub>24</sub> H <sub>24</sub> N <sub>2</sub>                                                                   |
| Acrihellin                  | Cardiotonic               | 67696-82-6  |      | C <sub>29</sub> H <sub>38</sub> O <sub>7</sub>                                                                   |
| Acrisorcin                  | Antifungal                | 90-45-9     |      | C <sub>13</sub> H <sub>10</sub> N <sub>2</sub>                                                                   |
| Acrivastine                 | Antihistaminic            | 87848-99-5  | Y    | C <sub>22</sub> H <sub>24</sub> N <sub>2</sub> O <sub>2</sub>                                                    |
| Acrocinnonide               | Steroid                   | 28971-58-6  |      | C <sub>24</sub> H <sub>29</sub> FO <sub>6</sub>                                                                  |
| Acronine                    | Antineoplastic            | 7008-42-6   |      | C <sub>20</sub> H <sub>19</sub> NO <sub>3</sub>                                                                  |
| Actarit                     | Antirheumatic             | 18699-02-0  | Y    | C <sub>10</sub> H <sub>11</sub> NO <sub>3</sub>                                                                  |
| Actinoquinol Sodium         | Dermatologic              | 15301-40-3  |      | C <sub>11</sub> H <sub>11</sub> NO <sub>4</sub> S                                                                |
| Actisomide                  | Antiarrhythmic            | 96914-39-5  |      | C <sub>23</sub> H <sub>35</sub> N <sub>5</sub> O                                                                 |
| Actodigin                   | Cardiotonic               | 36983-69-4  |      | C <sub>29</sub> H <sub>44</sub> O <sub>9</sub>                                                                   |
| Acyclovir                   | Antiviral                 | 59277-89-3  | Y    | C <sub>8</sub> H <sub>11</sub> N <sub>5</sub> O <sub>3</sub>                                                     |
| Adafenoxate                 | Antidepressant            | 82168-26-1  |      | C <sub>20</sub> H <sub>26</sub> ClNO <sub>3</sub>                                                                |
| Adamexine                   | Mucolytic                 | 54785-02-3  |      | C <sub>20</sub> H <sub>26</sub> Br <sub>2</sub> N <sub>2</sub> O                                                 |
| Adapalene                   | Dermatologic              | 106685-40-9 |      | C <sub>28</sub> H <sub>28</sub> O <sub>3</sub>                                                                   |
| Adaprolol Maleate           | Antihypertensive          | 101479-70-3 |      | C <sub>26</sub> H <sub>39</sub> NO <sub>4</sub>                                                                  |
| Adatanserin                 | Antidepressant            | 127266-56-2 |      | C <sub>21</sub> H <sub>31</sub> N <sub>5</sub> O                                                                 |
| Adefovir                    | Antiviral                 | 106941-25-7 |      | C <sub>8</sub> H <sub>12</sub> N <sub>5</sub> O <sub>4</sub> P                                                   |
| Adefovir Dipivoxil          | Antiviral                 | 142340-99-6 | Y    | C <sub>20</sub> H <sub>32</sub> N <sub>5</sub> O <sub>8</sub> P                                                  |
| Adekalant                   | Cardiotonic               | 227940-00-3 |      | C <sub>22</sub> H <sub>31</sub> N <sub>3</sub> O <sub>4</sub>                                                    |
| Adelmidrol                  | Oxytocic                  | 1675-66-7   |      | C <sub>13</sub> H <sub>26</sub> N <sub>2</sub> O <sub>4</sub>                                                    |
| Ademetionine                | Hepatic Protectant        | 29908-03-0  | Y    | C <sub>15</sub> H <sub>22</sub> N <sub>6</sub> O <sub>5</sub> S                                                  |
| Adenine                     | Antineoplastic            | 73-24-5     |      | C <sub>5</sub> H <sub>5</sub> N <sub>5</sub>                                                                     |
| Adenosine                   | Antiarrhythmic            | 58-61-7     |      | C <sub>10</sub> H <sub>13</sub> N <sub>5</sub> O <sub>4</sub>                                                    |
| Adibendan                   | Cardiotonic               | 100510-33-6 |      | C <sub>16</sub> H <sub>14</sub> N <sub>4</sub> O                                                                 |
| Adicillin                   | Antibiotic                | 525-94-0    |      | C <sub>14</sub> H <sub>21</sub> N <sub>3</sub> O <sub>6</sub> S                                                  |
| Adimolol                    | Antihypertensive          | 78459-19-5  |      | C <sub>25</sub> H <sub>29</sub> N <sub>3</sub> O <sub>3</sub>                                                    |
| Adinazolam                  | Antidepressant            | 37115-32-5  |      | C <sub>19</sub> H <sub>18</sub> ClN <sub>5</sub>                                                                 |
| Adiphenine                  | Antispasmodic             | 64-95-9     |      | C <sub>20</sub> H <sub>25</sub> NO <sub>2</sub>                                                                  |
| Adosopine                   | Urologic                  | 88124-26-9  |      | C <sub>17</sub> H <sub>14</sub> N <sub>2</sub> O <sub>3</sub>                                                    |
| Adozelesin                  | Antineoplastic            | 110314-48-2 |      | C <sub>30</sub> H <sub>22</sub> N <sub>4</sub> O <sub>4</sub>                                                    |
| Adrafinil                   | Antidepressant            | 63547-13-7  | Y    | C <sub>15</sub> H <sub>15</sub> NO <sub>3</sub> S                                                                |
| Adrenalone                  | Hemostatic                | 99-45-6     |      | C <sub>9</sub> H <sub>11</sub> NO <sub>3</sub>                                                                   |
| Adrenochrome                | Hemostatic                | 1214-74-0   |      | C <sub>10</sub> H <sub>13</sub> N <sub>5</sub> O <sub>2</sub>                                                    |
| Monoaminoguanidine Mesilate |                           |             |      |                                                                                                                  |
| Adrogolide                  | Antiparkinsonian          | 171752-56-0 |      | C <sub>22</sub> H <sub>25</sub> NO <sub>4</sub> S                                                                |
| Afeletecan                  | Antineoplastic            | 215604-75-4 |      | C <sub>45</sub> H <sub>49</sub> N <sub>7</sub> O <sub>11</sub> S                                                 |
| Afloqualone                 | Muscle Relaxant           | 56287-74-2  |      | C <sub>16</sub> H <sub>14</sub> FN <sub>3</sub> O                                                                |
| Afurolol                    | Antihypertensive          | 65776-67-2  |      | C <sub>15</sub> H <sub>21</sub> NO <sub>4</sub>                                                                  |
| Aganodine                   | Cardiotonic               | 86696-87-9  |      | C <sub>9</sub> H <sub>10</sub> Cl <sub>2</sub> N <sub>4</sub>                                                    |
| Aglepristone                | Progestogen               | 124478-60-0 |      | C <sub>29</sub> H <sub>37</sub> NO <sub>2</sub>                                                                  |
| Agomelatine                 | Antidepressant            | 138112-76-2 | Y    | C <sub>15</sub> H <sub>17</sub> NO <sub>2</sub>                                                                  |
| Ajmaline                    | Antihypertensive          | 4360-12-7   |      | C <sub>20</sub> H <sub>26</sub> N <sub>2</sub> O <sub>2</sub>                                                    |
| Aklomide                    | Antibacterial             | 3011-89-0   |      | C <sub>7</sub> H <sub>5</sub> ClN <sub>2</sub> O <sub>3</sub>                                                    |
| Alacepril                   | Antihypertensive          | 74258-86-9  | Y    | C <sub>20</sub> H <sub>26</sub> N <sub>2</sub> O <sub>5</sub> S                                                  |
| Alafosfalin                 | Bone Resorption Inhibitor | 60668-24-8  |      | C <sub>5</sub> H <sub>13</sub> N <sub>2</sub> O <sub>4</sub> P                                                   |
| Alagebrium Chloride         | Antidiabetic              | 341028-37-3 |      | C <sub>13</sub> H <sub>14</sub> ClNOS                                                                            |
| Alamifovir                  | Antiviral                 | 193681-12-8 |      | C <sub>19</sub> H <sub>20</sub> F <sub>6</sub> N <sub>5</sub> O <sub>5</sub> PS                                  |
| Alaproclate                 | Antidepressant            | 60719-82-6  |      | C <sub>13</sub> H <sub>18</sub> ClNO <sub>2</sub>                                                                |
| Alatrofloxacin              | Antibacterial             | 146961-76-4 |      | C <sub>26</sub> H <sub>25</sub> F <sub>3</sub> N <sub>6</sub> O <sub>5</sub>                                     |

Table S1. Cont.

| Common Name                | Indication                   | CAS Number  | Oral | Molecular Formula                                                                                              |
|----------------------------|------------------------------|-------------|------|----------------------------------------------------------------------------------------------------------------|
| Alazanine Triclofenate     | Antiinflammatory             | 7775-97-5   |      | C <sub>21</sub> H <sub>21</sub> N <sub>2</sub> S <sub>2</sub> .C <sub>6</sub> H <sub>2</sub> Cl <sub>3</sub> O |
| Albaconazole               | Antifungal                   | 187949-02-6 |      | C <sub>20</sub> H <sub>16</sub> ClF <sub>2</sub> N <sub>5</sub> O <sub>2</sub>                                 |
| Albendazole                | Anthelmintic                 | 54965-21-8  | Y    | C <sub>12</sub> H <sub>15</sub> N <sub>3</sub> O <sub>2</sub> S                                                |
| Albendazole Oxide          | Anthelmintic                 | 54029-12-8  |      | C <sub>12</sub> H <sub>15</sub> N <sub>3</sub> O <sub>3</sub> S                                                |
| Albuterol                  | Bronchodilator               | 18559-94-9  |      | C <sub>13</sub> H <sub>21</sub> NO <sub>3</sub>                                                                |
| Albutoin                   | Anticonvulsant               | 830-89-7    |      | C <sub>10</sub> H <sub>16</sub> N <sub>2</sub> OS                                                              |
| Alclofenac                 | Analgesic                    | 22131-79-9  |      | C <sub>11</sub> H <sub>11</sub> ClO <sub>3</sub>                                                               |
| Alclometasone Dipropionate | Antiinflammatory             | 66734-13-2  |      | C <sub>28</sub> H <sub>37</sub> ClO <sub>7</sub>                                                               |
| Alcohol                    | Antidote                     | 64-17-5     |      | C <sub>2</sub> H <sub>6</sub> O                                                                                |
| Alcuronium Chloride        | Neuromuscular Blocking Agent | 15180-03-7  |      | C <sub>44</sub> H <sub>50</sub> N <sub>4</sub> O <sub>2</sub> .2Cl                                             |
| Aldioxa                    | Antiulcerative               | 5579-81-7   |      | C <sub>4</sub> H <sub>7</sub> AlN <sub>4</sub> O <sub>5</sub>                                                  |
| Alemcinal                  | Gastroprokinetic             | 150785-53-8 |      | C <sub>38</sub> H <sub>67</sub> NO <sub>10</sub>                                                               |
| Alendronic Acid            | Bone Resorption Inhibitor    | 66376-36-1  | Y    | C <sub>4</sub> H <sub>13</sub> NO <sub>7</sub> P <sub>2</sub>                                                  |
| Alentemol Hydrobromide     | Antipsychotic                | 112891-97-1 |      | C <sub>19</sub> H <sub>25</sub> NO                                                                             |
| Alepride                   | Gastroprokinetic             | 66564-15-6  |      | C <sub>22</sub> H <sub>30</sub> ClN <sub>3</sub> O <sub>2</sub>                                                |
| Alestramustine             | Antineoplastic               | 139402-18-9 |      | C <sub>26</sub> H <sub>36</sub> Cl <sub>2</sub> N <sub>2</sub> O <sub>4</sub>                                  |
| Aletamine                  | Antidepressant               | 4255-23-6   |      | C <sub>11</sub> H <sub>15</sub> N                                                                              |
| Alexidine                  | Antibacterial                | 22573-93-9  |      | C <sub>26</sub> H <sub>56</sub> N <sub>10</sub>                                                                |
| Alfadex                    | Erectile Dysfunction         | 10016-20-3  | Y    | C <sub>36</sub> H <sub>60</sub> O <sub>30</sub>                                                                |
| Alfadolone                 | Anesthetic                   | 14107-37-0  |      | C <sub>21</sub> H <sub>32</sub> O <sub>4</sub>                                                                 |
| Alfaprostol                | Prostaglandin                | 74176-31-1  |      | C <sub>24</sub> H <sub>38</sub> O <sub>5</sub>                                                                 |
| Alfatradiol                | Estrogen                     | 57-91-0     |      | C <sub>18</sub> H <sub>24</sub> O <sub>2</sub>                                                                 |
| Alfaxalone                 | Anesthetic                   | 23930-19-0  |      | C <sub>21</sub> H <sub>32</sub> O <sub>3</sub>                                                                 |
| Alfentanil                 | Analgesic                    | 71195-58-9  |      | C <sub>21</sub> H <sub>32</sub> N <sub>6</sub> O <sub>3</sub>                                                  |
| Alfuzosin                  | Antihypertensive             | 81403-80-7  |      | C <sub>19</sub> H <sub>27</sub> N <sub>5</sub> O <sub>4</sub>                                                  |
| Algestone Acetonide        | Antiinflammatory             | 4968-09-6   |      | C <sub>24</sub> H <sub>34</sub> O <sub>4</sub>                                                                 |
| Algestone Acetophenide     | Dermatologic                 | 24356-94-3  |      | C <sub>29</sub> H <sub>36</sub> O <sub>4</sub>                                                                 |
| Alibendol                  | Choleretic                   | 26750-81-2  |      | C <sub>13</sub> H <sub>17</sub> NO <sub>4</sub>                                                                |
| Aliconazole                | Antifungal                   | 63824-12-4  |      | C <sub>18</sub> H <sub>13</sub> Cl <sub>3</sub> N <sub>2</sub>                                                 |
| Alifedrine                 | Cardiotonic                  | 78756-61-3  |      | C <sub>18</sub> H <sub>27</sub> NO <sub>2</sub>                                                                |
| Aliflurane                 | Anesthetic                   | 56689-41-9  |      | C <sub>4</sub> H <sub>5</sub> ClF <sub>4</sub> O                                                               |
| Alimadol                   | Nootropic                    | 52742-40-2  |      | C <sub>19</sub> H <sub>23</sub> NO                                                                             |
| Alinastine                 | Antihistaminic               | 154541-72-7 | Y    | C <sub>28</sub> H <sub>39</sub> N <sub>3</sub> O                                                               |
| Alinidine                  | Antiarrhythmic               | 33178-86-8  |      | C <sub>12</sub> H <sub>13</sub> Cl <sub>2</sub> N <sub>3</sub>                                                 |
| Alipamide                  | Diuretic                     | 3184-59-6   |      | C <sub>9</sub> H <sub>12</sub> ClN <sub>3</sub> O <sub>3</sub> S                                               |
| Aliskiren                  | Antihypertensive             | 173334-57-1 | Y    | C <sub>30</sub> H <sub>53</sub> N <sub>3</sub> O <sub>6</sub>                                                  |
| Alitretinoin               | Antineoplastic               | 5300-03-8   |      | C <sub>20</sub> H <sub>28</sub> O <sub>2</sub>                                                                 |
| Alizapride                 | Antiemetic                   | 59338-93-1  | Y    | C <sub>16</sub> H <sub>21</sub> N <sub>5</sub> O <sub>2</sub>                                                  |
| Alkofanone                 | Antidiarrheal                | 7527-94-8   |      | C <sub>21</sub> H <sub>19</sub> NO <sub>3</sub> S                                                              |
| Allantoin                  | Dermatologic                 | 97-59-6     |      | C <sub>4</sub> H <sub>6</sub> N <sub>4</sub> O <sub>3</sub>                                                    |
| Alletorphine               | Analgesic                    | 23758-80-7  |      | C <sub>27</sub> H <sub>35</sub> NO <sub>4</sub>                                                                |
| Allobarbitol               | Sedative                     | 52-43-7     |      | C <sub>10</sub> H <sub>12</sub> N <sub>2</sub> O <sub>3</sub>                                                  |
| Alloclamide                | Antitussive                  | 5486-77-1   |      | C <sub>16</sub> H <sub>23</sub> ClN <sub>2</sub> O <sub>2</sub>                                                |
| Allocupreide Sodium        | Antirheumatic                | 500-48-1    |      | C <sub>11</sub> H <sub>12</sub> N <sub>2</sub> O <sub>2</sub> S                                                |
| Allomethadione             | Anticonvulsant               | 526-35-2    |      | C <sub>7</sub> H <sub>9</sub> NO <sub>3</sub>                                                                  |
| Allopurinol                | Antiurolithic                | 315-30-0    | Y    | C <sub>5</sub> H <sub>4</sub> N <sub>4</sub> O                                                                 |
| Allyl Isothiocyanate       | Dermatologic                 | 57-06-7     |      | C <sub>4</sub> H <sub>5</sub> NS                                                                               |
| Allylestrenol              | Progestogen                  | 432-60-0    |      | C <sub>21</sub> H <sub>32</sub> O                                                                              |
| Allylprodine               | Analgesic                    | 25384-17-2  |      | C <sub>18</sub> H <sub>25</sub> NO <sub>2</sub>                                                                |
| Almecillin                 | Antibiotic                   | 87-09-2     |      | C <sub>13</sub> H <sub>18</sub> N <sub>2</sub> O <sub>4</sub> S <sub>2</sub>                                   |
| Almestrone                 | Steroid                      | 10448-96-1  |      | C <sub>19</sub> H <sub>24</sub> O <sub>2</sub>                                                                 |
| Alminoprofen               | Antiinflammatory             | 39718-89-3  |      | C <sub>13</sub> H <sub>17</sub> NO <sub>2</sub>                                                                |
| Almitrine                  | Respiratory Stimulant        | 27469-53-0  |      | C <sub>26</sub> H <sub>29</sub> F <sub>2</sub> N <sub>7</sub>                                                  |
| Almokalant                 | Antiarrhythmic               | 123955-10-2 |      | C <sub>18</sub> H <sub>28</sub> N <sub>2</sub> O <sub>3</sub> S                                                |
| Almotriptan                | Antimigraine                 | 154323-57-6 | Y    | C <sub>17</sub> H <sub>25</sub> N <sub>3</sub> O <sub>2</sub> S                                                |
| Almoxatone                 | Antidepressant               | 84145-89-1  |      | C <sub>18</sub> H <sub>19</sub> ClN <sub>2</sub> O <sub>3</sub>                                                |
| Almurtide                  | Immunomodulator              | 61136-12-7  |      | C <sub>18</sub> H <sub>30</sub> N <sub>4</sub> O <sub>11</sub>                                                 |
| Alnespirone                | Antidepressant               | 138298-79-0 |      | C <sub>26</sub> H <sub>38</sub> N <sub>2</sub> O <sub>4</sub>                                                  |
| Alniditan Di               | Antimigraine                 | 152317-89-0 |      | C <sub>17</sub> H <sub>26</sub> N <sub>4</sub> O                                                               |
| Alonacic                   | Ophthalmic                   | 105292-70-4 |      | C <sub>9</sub> H <sub>16</sub> N <sub>2</sub> O <sub>3</sub> S                                                 |
| Alonimid                   | Sedative                     | 2897-83-8   |      | C <sub>14</sub> H <sub>13</sub> NO <sub>3</sub>                                                                |
| Aloracetam                 | Nootropic                    | 119610-26-3 |      | C <sub>11</sub> H <sub>16</sub> N <sub>2</sub> O <sub>2</sub>                                                  |

Table S1. Cont.

| Common Name            | Indication                   | CAS Number  | Oral | Molecular Formula                                                                |
|------------------------|------------------------------|-------------|------|----------------------------------------------------------------------------------|
| Alosetron              | Antidiarrheal                | 122852-42-0 | Y    | C <sub>17</sub> H <sub>18</sub> N <sub>4</sub> O                                 |
| Alovudine              | Antiviral                    | 25526-93-6  |      | C <sub>10</sub> H <sub>13</sub> F <sub>2</sub> N <sub>2</sub> O <sub>4</sub>     |
| Aloxistatin            | Immunomodulator              | 88321-09-9  |      | C <sub>17</sub> H <sub>30</sub> N <sub>2</sub> O <sub>5</sub>                    |
| Alozafone              | Anticonvulsant               | 65899-72-1  |      | C <sub>21</sub> H <sub>21</sub> ClFN <sub>3</sub> O <sub>2</sub>                 |
| Alpertine              | Antipsychotic                | 27076-46-6  |      | C <sub>25</sub> H <sub>31</sub> N <sub>3</sub> O <sub>4</sub>                    |
| Alphacetylmethadol     | Analgesic                    | 17199-58-5  |      | C <sub>23</sub> H <sub>31</sub> NO <sub>2</sub>                                  |
| Alpha Cypermethrin     | Ectoparasiticide             | 67375-30-8  |      | C <sub>22</sub> H <sub>19</sub> Cl <sub>2</sub> NO <sub>3</sub>                  |
| Alphameprodine         | Analgesic                    | 468-51-9    |      | C <sub>17</sub> H <sub>25</sub> NO <sub>2</sub>                                  |
| Alphamethadol          | Analgesic                    | 17199-54-1  |      | C <sub>21</sub> H <sub>29</sub> NO                                               |
| Alphaprodine           | Analgesic                    | 77-20-3     |      | C <sub>16</sub> H <sub>23</sub> NO <sub>2</sub>                                  |
| Alpidem                | Anxiolytic                   | 82626-01-5  |      | C <sub>21</sub> H <sub>23</sub> Cl <sub>2</sub> N <sub>3</sub> O                 |
| Alpiropride            | Antimigraine                 | 81982-32-3  |      | C <sub>17</sub> H <sub>26</sub> N <sub>4</sub> O <sub>4</sub> S                  |
| Alprafenone            | Antiarrhythmic               | 124316-02-5 |      | C <sub>25</sub> H <sub>35</sub> NO <sub>4</sub>                                  |
| Alprazolam             | Anxiolytic                   | 28981-97-7  | Y    | C <sub>17</sub> H <sub>13</sub> ClN <sub>4</sub>                                 |
| Alprenolol             | Antihypertensive             | 13655-52-2  | Y    | C <sub>15</sub> H <sub>23</sub> NO <sub>2</sub>                                  |
| Alprenoxime            | Antiglaucoma                 | 118552-63-9 |      | C <sub>15</sub> H <sub>22</sub> N <sub>2</sub> O <sub>2</sub>                    |
| Alprostadiol           | Vasodilator                  | 745-65-3    |      | C <sub>20</sub> H <sub>34</sub> O <sub>5</sub>                                   |
| Alrestatin             | Antidiabetic                 | 51411-04-2  |      | C <sub>14</sub> H <sub>9</sub> NO <sub>4</sub>                                   |
| Altanserin Tartrate    | Antidepressant               | 76330-71-7  |      | C <sub>22</sub> H <sub>22</sub> FN <sub>3</sub> O <sub>2</sub> S                 |
| Altapizone             | Vasodilator                  | 93277-96-4  |      | C <sub>24</sub> H <sub>28</sub> N <sub>4</sub> O <sub>2</sub>                    |
| Alteconazole           | Antifungal                   | 93479-96-0  |      | C <sub>17</sub> H <sub>12</sub> Cl <sub>3</sub> N <sub>3</sub> O                 |
| Althiazide             | Diuretic                     | 5588-16-9   |      | C <sub>11</sub> H <sub>14</sub> ClN <sub>3</sub> O <sub>4</sub> S <sub>3</sub>   |
| Altinicline            | Nootropic                    | 179120-92-4 |      | C <sub>12</sub> H <sub>14</sub> N <sub>2</sub>                                   |
| Altoqualine            | Antibiotic                   | 121029-11-6 |      | C <sub>27</sub> H <sub>36</sub> N <sub>2</sub> O <sub>8</sub>                    |
| Altrenogest            | Progestogen                  | 850-52-2    |      | C <sub>21</sub> H <sub>26</sub> O <sub>2</sub>                                   |
| Altretamine            | Antineoplastic               | 645-05-6    |      | C <sub>9</sub> H <sub>18</sub> N <sub>6</sub>                                    |
| Alvameline Maleate     | Antipsychotic                | 120241-31-8 |      | C <sub>9</sub> H <sub>15</sub> N <sub>5</sub>                                    |
| Alverine               | Antispasmodic                | 150-59-4    |      | C <sub>20</sub> H <sub>27</sub> N                                                |
| Alvimopan              | Antiemetic                   | 156053-89-3 | Y    | C <sub>25</sub> H <sub>32</sub> N <sub>2</sub> O <sub>4</sub>                    |
| Alvocidib              | Antineoplastic               | 146426-40-6 |      | C <sub>21</sub> H <sub>20</sub> ClNO <sub>5</sub>                                |
| Amadinone Acetate      | Progestogen                  | 22304-34-3  |      | C <sub>22</sub> H <sub>27</sub> ClO <sub>4</sub>                                 |
| Amafolone              | Steroid                      | 50588-47-1  |      | C <sub>19</sub> H <sub>31</sub> NO <sub>2</sub>                                  |
| Amanozine              | Diuretic                     | 537-17-7    |      | C <sub>9</sub> H <sub>9</sub> N <sub>5</sub>                                     |
| Amantadine             | Antiviral                    | 768-94-5    | Y    | C <sub>10</sub> H <sub>17</sub> N                                                |
| Amantocillin           | Antibiotic                   | 10004-67-8  |      | C <sub>19</sub> H <sub>27</sub> N <sub>3</sub> O <sub>4</sub> S                  |
| Ambamustine            | Antineoplastic               | 85754-59-2  |      | C <sub>29</sub> H <sub>39</sub> Cl <sub>2</sub> FN <sub>4</sub> O <sub>4</sub> S |
| Ambasilide             | Antiarrhythmic               | 83991-25-7  |      | C <sub>21</sub> H <sub>25</sub> N <sub>3</sub> O                                 |
| Ambazone               | Antibacterial                | 539-21-9    |      | C <sub>8</sub> H <sub>11</sub> N <sub>7</sub> S                                  |
| Ambenonium             | Neuromuscular Blocking Agent | 7648-98-8   | Y    | C <sub>28</sub> H <sub>42</sub> Cl <sub>2</sub> N <sub>4</sub> O <sub>2</sub>    |
| Ambenoxan              | Anxiolytic                   | 2455-84-7   |      | C <sub>14</sub> H <sub>21</sub> NO <sub>4</sub>                                  |
| Ambrisentan            | Anticoagulant                | 177036-94-1 | Y    | C <sub>22</sub> H <sub>22</sub> N <sub>2</sub> O <sub>4</sub>                    |
| Ambroxol               | Expectorant                  | 18683-91-5  | Y    | C <sub>13</sub> H <sub>18</sub> Br <sub>2</sub> N <sub>2</sub> O                 |
| Ambruticin             | Antifungal                   | 58857-02-6  |      | C <sub>28</sub> H <sub>42</sub> O <sub>6</sub>                                   |
| Ambucaine              | Anesthetic                   | 119-29-9    |      | C <sub>17</sub> H <sub>28</sub> N <sub>2</sub> O <sub>3</sub>                    |
| Ambucetamide           | Antispasmodic                | 519-88-0    |      | C <sub>17</sub> H <sub>28</sub> N <sub>2</sub> O <sub>2</sub>                    |
| Ambuphylline           | Bronchodilator               | 124-68-5    |      | C <sub>4</sub> H <sub>11</sub> NO                                                |
| Ambuside               | Diuretic                     | 3754-19-6   |      | C <sub>13</sub> H <sub>16</sub> ClN <sub>3</sub> O <sub>5</sub> S <sub>2</sub>   |
| Ambuton Bromide        | Antispasmodic                | 115-51-5    |      | C <sub>20</sub> H <sub>27</sub> BrN <sub>2</sub> O                               |
| Amcinafal              | Antiinflammatory             | 3924-70-7   |      | C <sub>26</sub> H <sub>35</sub> FO <sub>6</sub>                                  |
| Amcinafide             | Antiinflammatory             | 7332-27-6   |      | C <sub>29</sub> H <sub>33</sub> FO <sub>6</sub>                                  |
| Amcinonide             | Glucocorticoid               | 51022-69-6  |      | C <sub>28</sub> H <sub>35</sub> FO <sub>7</sub>                                  |
| Amdinocillin           | Antibiotic                   | 32887-01-7  |      | C <sub>15</sub> H <sub>23</sub> N <sub>3</sub> O <sub>5</sub> S                  |
| Amdoxovir              | Antiviral                    | 145514-04-1 |      | C <sub>9</sub> H <sub>12</sub> N <sub>6</sub> O <sub>3</sub>                     |
| Amebucort              | Glucocorticoid               | 83625-35-8  |      | C <sub>28</sub> H <sub>40</sub> O <sub>7</sub>                                   |
| Amedalin               | Antidepressant               | 22136-26-1  |      | C <sub>19</sub> H <sub>22</sub> N <sub>2</sub> O                                 |
| Amelometasone          | Steroid                      | 123013-22-9 |      | C <sub>26</sub> H <sub>35</sub> FO <sub>6</sub>                                  |
| Ameltolide             | Anticonvulsant               | 787-93-9    |      | C <sub>15</sub> H <sub>16</sub> N <sub>2</sub> O                                 |
| Amelubant              | Antirheumatic                | 346735-24-8 |      | C <sub>33</sub> H <sub>34</sub> N <sub>2</sub> O <sub>5</sub>                    |
| Amesergide             | Antidepressant               | 121588-75-8 |      | C <sub>25</sub> H <sub>35</sub> N <sub>3</sub> O                                 |
| Ametantrone Acetate    | Antineoplastic               | 64862-96-0  |      | C <sub>22</sub> H <sub>28</sub> N <sub>4</sub> O <sub>4</sub>                    |
| Amezepine              | Analgesic                    | 60575-32-8  |      | C <sub>18</sub> H <sub>20</sub> N <sub>2</sub>                                   |
| Amezinium Metilsulfate | Antihypertensive             | 41658-78-0  |      | C <sub>11</sub> H <sub>12</sub> N <sub>3</sub> O                                 |

Table S1. Cont.

| Common Name              | Indication        | CAS Number  | Oral | Molecular Formula                                                             |
|--------------------------|-------------------|-------------|------|-------------------------------------------------------------------------------|
| Amfenac                  | Antiinflammatory  | 51579-82-9  |      | C <sub>15</sub> H <sub>13</sub> NO <sub>3</sub>                               |
| Amfepentorex             | Anorexic          | 15686-27-8  |      | C <sub>15</sub> H <sub>25</sub> N                                             |
| Amfetaminil              | Nootropic         | 17590-01-1  |      | C <sub>17</sub> H <sub>18</sub> N <sub>2</sub>                                |
| Amflutizole              | Antiuro lithic    | 82114-19-0  |      | C <sub>11</sub> H <sub>7</sub> F <sub>3</sub> N <sub>2</sub> O <sub>2</sub> S |
| Amfonelic Acid           | Nootropic         | 15180-02-6  |      | C <sub>18</sub> H <sub>16</sub> N <sub>2</sub> O <sub>3</sub>                 |
| Amicarbalide             | Antiprotozoal     | 3459-96-9   |      | C <sub>15</sub> H <sub>16</sub> N <sub>6</sub> O                              |
| Amicibone                | Antitussive       | 23271-63-8  |      | C <sub>22</sub> H <sub>31</sub> NO <sub>3</sub>                               |
| Amicycline               | Antibiotic        | 5874-95-3   |      | C <sub>21</sub> H <sub>23</sub> N <sub>3</sub> O <sub>7</sub>                 |
| Amidantel                | Anthelminthic     | 49745-00-8  |      | C <sub>13</sub> H <sub>19</sub> N <sub>3</sub> O <sub>2</sub>                 |
| Amidapsone               | Antiviral         | 3569-77-5   |      | C <sub>13</sub> H <sub>13</sub> N <sub>3</sub> O <sub>3</sub> S               |
| Amidephrine Mesylate     | Decongestant      | 37571-84-9  |      | C <sub>10</sub> H <sub>16</sub> N <sub>2</sub> O <sub>3</sub> S               |
| Amiflamine               | Antidepressant    | 77518-07-1  |      | C <sub>12</sub> H <sub>20</sub> N <sub>2</sub>                                |
| Amifloverine             | Antispasmodic     | 54063-24-0  |      | C <sub>16</sub> H <sub>27</sub> NO <sub>3</sub>                               |
| Amifloxacin              | Antibiotic        | 86393-37-5  |      | C <sub>16</sub> H <sub>19</sub> FN <sub>4</sub> O <sub>3</sub>                |
| Amifostine               | Antineoplastic    | 20537-88-6  |      | C <sub>5</sub> H <sub>15</sub> N <sub>2</sub> O <sub>3</sub> PS               |
| Amiglumide               | Gastroprokinetic  | 119363-62-1 |      | C <sub>26</sub> H <sub>36</sub> N <sub>2</sub> O <sub>4</sub>                 |
| Amikacin                 | Antibiotic        | 37517-28-5  |      | C <sub>22</sub> H <sub>43</sub> N <sub>5</sub> O <sub>13</sub>                |
| Amikhelline              | Antispasmodic     | 4439-67-2   |      | C <sub>18</sub> H <sub>21</sub> NO <sub>5</sub>                               |
| Amiloride                | Diuretic          | 2609-46-3   | Y    | C <sub>6</sub> H <sub>8</sub> ClN <sub>7</sub> O                              |
| Amiloxate                | Dermatologic      | 71617-10-2  |      | C <sub>15</sub> H <sub>20</sub> O <sub>3</sub>                                |
| Amindocate               | Estrogen          | 31386-24-0  |      | C <sub>19</sub> H <sub>29</sub> N <sub>3</sub> O <sub>2</sub>                 |
| Amineptine               | Nootropic         | 57574-09-1  | Y    | C <sub>22</sub> H <sub>27</sub> NO <sub>2</sub>                               |
| Aminobenzoic Acid        | Dermatologic      | 1321-11-5   |      | C <sub>7</sub> H <sub>7</sub> NO <sub>2</sub>                                 |
| Aminocaproic Acid        | Hemostatic        | 1319-82-0   | Y    | C <sub>6</sub> H <sub>13</sub> NO <sub>2</sub>                                |
| Aminoethyl Nitrate       | Unclassified      | 646-02-6    |      | C <sub>2</sub> H <sub>6</sub> N <sub>2</sub> O <sub>3</sub>                   |
| Aminoglutethimide        | Antineoplastic    | 125-84-8    | Y    | C <sub>13</sub> H <sub>16</sub> N <sub>2</sub> O <sub>2</sub>                 |
| Aminolevulinic Acid      | Antineoplastic    | 106-60-5    | Y    | C <sub>5</sub> H <sub>9</sub> NO <sub>3</sub>                                 |
| Aminometradine           | Diuretic          | 642-44-4    |      | C <sub>9</sub> H <sub>13</sub> N <sub>3</sub> O <sub>2</sub>                  |
| Aminopentamide Sulfate   | Antispasmodic     | 60-46-8     |      | C <sub>19</sub> H <sub>24</sub> N <sub>2</sub> O                              |
| Aminophenazone Cyclamate | Analgesic         | 100-88-9    |      | C <sub>6</sub> H <sub>13</sub> NO <sub>3</sub> S                              |
| Aminopromazine           | Antispasmodic     | 58-37-7     |      | C <sub>19</sub> H <sub>25</sub> N <sub>3</sub> S                              |
| Aminopterin              | Antibacterial     | 54-62-6     |      | C <sub>19</sub> H <sub>20</sub> N <sub>8</sub> O <sub>5</sub>                 |
| Aminopyrine              | Antiinflammatory  | 58-15-1     |      | C <sub>13</sub> H <sub>17</sub> N <sub>3</sub> O                              |
| Aminorex                 | Anorexic          | 2207-50-3   |      | C <sub>9</sub> H <sub>10</sub> N <sub>2</sub> O                               |
| Aminosalicilic Acid      | Antibacterial     | 28088-64-4  | Y    | C <sub>7</sub> H <sub>7</sub> NO <sub>3</sub>                                 |
| Amiodarone               | Antiarrhythmic    | 1951-25-3   | Y    | C <sub>25</sub> H <sub>29</sub> I <sub>2</sub> NO <sub>3</sub>                |
| Amiperone                | Sedative          | 1580-71-8   |      | C <sub>24</sub> H <sub>28</sub> ClFN <sub>2</sub> O <sub>2</sub>              |
| Amiphenazole             | Nootropic         | 490-55-1    |      | C <sub>9</sub> H <sub>9</sub> N <sub>3</sub> S                                |
| Amipizone                | Bronchodilator    | 69635-63-8  |      | C <sub>14</sub> H <sub>16</sub> ClN <sub>3</sub> O <sub>2</sub>               |
| Amiprilose               | Immunosuppressant | 56824-20-5  |      | C <sub>14</sub> H <sub>27</sub> NO <sub>6</sub>                               |
| Amiquinsin               | Antihypertensive  | 13425-92-8  |      | C <sub>11</sub> H <sub>12</sub> N <sub>2</sub> O <sub>2</sub>                 |
| Amisometradine           | Diuretic          | 550-28-7    |      | C <sub>9</sub> H <sub>13</sub> N <sub>3</sub> O <sub>2</sub>                  |
| Amisulpride              | Antipsychotic     | 71675-85-9  | Y    | C <sub>17</sub> H <sub>27</sub> N <sub>3</sub> O <sub>4</sub> S               |
| Amiterol                 | Bronchodilator    | 54063-25-1  |      | C <sub>12</sub> H <sub>20</sub> N <sub>2</sub> O                              |
| Amithiozone              | Antibacterial     | 104-06-3    |      | C <sub>10</sub> H <sub>12</sub> N <sub>4</sub> OS                             |
| Amitivir                 | Antiviral         | 111393-84-1 |      | C <sub>3</sub> H <sub>2</sub> N <sub>4</sub> S                                |
| Amitraz                  | Ectoparasiticide  | 33089-61-1  |      | C <sub>19</sub> H <sub>23</sub> N <sub>3</sub>                                |
| Amitriptyline            | Antidepressant    | 50-48-6     | Y    | C <sub>20</sub> H <sub>23</sub> N                                             |
| Amitriptylinoxide        | Antidepressant    | 4317-14-0   |      | C <sub>20</sub> H <sub>23</sub> NO                                            |
| Amixetrine               | Antiinflammatory  | 24622-72-8  |      | C <sub>17</sub> H <sub>27</sub> NO                                            |
| Amlexanox                | Antihistaminic    | 68302-57-8  |      | C <sub>16</sub> H <sub>14</sub> N <sub>2</sub> O <sub>4</sub>                 |
| Amlodipine               | Antianginal       | 88150-42-9  | Y    | C <sub>20</sub> H <sub>25</sub> ClN <sub>2</sub> O <sub>5</sub>               |
| Ammonium Valerate        | Sedative          | 109-52-4    |      | C <sub>5</sub> H <sub>10</sub> O <sub>2</sub>                                 |
| Amobarbital              | Sedative          | 57-43-2     |      | C <sub>11</sub> H <sub>18</sub> N <sub>2</sub> O <sub>3</sub>                 |
| Amocarzine               | Anthelminthic     | 36590-19-9  |      | C <sub>18</sub> H <sub>21</sub> N <sub>5</sub> O <sub>2</sub> S               |
| Amodiaquine              | Antimalarial      | 86-42-0     | Y    | C <sub>20</sub> H <sub>22</sub> ClN <sub>3</sub> O                            |
| Amogastrin               | Antispasmodic     | 16870-37-4  |      | C <sub>35</sub> H <sub>46</sub> N <sub>6</sub> O <sub>8</sub> S               |
| Amolanone                | Anesthetic        | 76-65-3     |      | C <sub>20</sub> H <sub>23</sub> NO <sub>2</sub>                               |
| Amonafide                | Antineoplastic    | 69408-81-7  |      | C <sub>16</sub> H <sub>17</sub> N <sub>3</sub> O <sub>2</sub>                 |
| Amoproxan                | Antiarrhythmic    | 22661-76-3  |      | C <sub>22</sub> H <sub>35</sub> NO <sub>7</sub>                               |
| Amopyroquine             | Antimalarial      | 550-81-2    |      | C <sub>20</sub> H <sub>20</sub> ClN <sub>3</sub> O                            |
| Amorolfine               | Antibacterial     | 78613-35-1  |      | C <sub>21</sub> H <sub>35</sub> NO                                            |
| Amoscanate               | Anthelminthic     | 26328-53-0  |      | C <sub>13</sub> H <sub>9</sub> N <sub>3</sub> O <sub>2</sub> S                |

Table S1. Cont.

| Common Name                | Indication        | CAS Number  | Oral | Molecular Formula                                                               |
|----------------------------|-------------------|-------------|------|---------------------------------------------------------------------------------|
| Amosulalol                 | Antihypertensive  | 85320-68-9  | Y    | C <sub>18</sub> H <sub>24</sub> N <sub>2</sub> O <sub>5</sub> S                 |
| Amotosalen                 | Dermatologic      | 161262-29-9 |      | C <sub>17</sub> H <sub>19</sub> NO <sub>4</sub>                                 |
| Amotriphene                | Vasodilator       | 5585-64-8   |      | C <sub>26</sub> H <sub>29</sub> NO <sub>3</sub>                                 |
| Amoxapine                  | Antidepressant    | 14028-44-5  | Y    | C <sub>17</sub> H <sub>16</sub> ClN <sub>3</sub> O                              |
| Amoxecaine                 | Anesthetic        | 553-65-1    |      | C <sub>17</sub> H <sub>29</sub> N <sub>3</sub> O <sub>2</sub>                   |
| Amoxicillin                | Antibiotic        | 26787-78-0  | Y    | C <sub>16</sub> H <sub>19</sub> N <sub>3</sub> O <sub>5</sub> S                 |
| Amoxydramine Camsilate     | Antihypertensive  | 3922-74-5   |      | C <sub>17</sub> H <sub>21</sub> NO <sub>2</sub>                                 |
| Amoxydramine Camsilate     | Antihypertensive  | 3144-16-9   |      | C <sub>10</sub> H <sub>16</sub> O <sub>4</sub> S                                |
| Amperozide                 | Sedative          | 75558-90-6  |      | C <sub>23</sub> H <sub>29</sub> F <sub>2</sub> N <sub>3</sub> O                 |
| Amphecloral                | Anorexic          | 5581-35-1   |      | C <sub>11</sub> H <sub>12</sub> Cl <sub>3</sub> N                               |
| Amphenidone                | Sedative          | 134-37-2    |      | C <sub>11</sub> H <sub>10</sub> N <sub>2</sub> O                                |
| Amphetamine                | Nootropic         | 300-62-9    | Y    | C <sub>9</sub> H <sub>13</sub> N                                                |
| Amphotilide                | Antithrombotic    | 1673-06-9   |      | C <sub>19</sub> H <sub>20</sub> N <sub>2</sub> O <sub>3</sub>                   |
| Ampicillin                 | Antibiotic        | 69-53-4     | Y    | C <sub>16</sub> H <sub>19</sub> N <sub>3</sub> O <sub>4</sub> S                 |
| Ampiroxicam                | Antiinflammatory  | 99464-64-9  |      | C <sub>20</sub> H <sub>21</sub> N <sub>3</sub> O <sub>7</sub> S                 |
| Ampronavir                 | Antiviral         | 161814-49-9 | Y    | C <sub>25</sub> H <sub>35</sub> N <sub>3</sub> O <sub>6</sub> S                 |
| Amprolium                  | Antibacterial     | 121-25-5    |      | C <sub>14</sub> H <sub>19</sub> N <sub>4</sub> Cl                               |
| Amprotropine Phosphate     | Antihypertensive  | 148-32-3    |      | C <sub>18</sub> H <sub>29</sub> NO <sub>3</sub>                                 |
| Ampyrimine                 | Antineoplastic    | 5587-93-9   |      | C <sub>12</sub> H <sub>11</sub> N <sub>7</sub>                                  |
| Ampyzine Sulfate           | Nootropic         | 5214-29-9   |      | C <sub>6</sub> H <sub>9</sub> N <sub>3</sub>                                    |
| Amquinat                   | Antimalarial      | 17230-85-2  |      | C <sub>18</sub> H <sub>24</sub> N <sub>2</sub> O <sub>3</sub>                   |
| Amrinone                   | Cardiotonic       | 60719-84-8  |      | C <sub>10</sub> H <sub>9</sub> N <sub>3</sub> O                                 |
| Amrubicin                  | Antineoplastic    | 110267-81-7 |      | C <sub>25</sub> H <sub>25</sub> NO <sub>9</sub>                                 |
| Amsacrine                  | Antineoplastic    | 51264-14-3  |      | C <sub>21</sub> H <sub>19</sub> N <sub>3</sub> O <sub>3</sub> S                 |
| Amtolmetin Guacil          | Analgesic         | 87344-06-7  | Y    | C <sub>24</sub> H <sub>24</sub> N <sub>2</sub> O <sub>5</sub>                   |
| Amustaline Dihydrochloride | Antibacterial     | 878189-87-8 |      | C <sub>22</sub> H <sub>25</sub> Cl <sub>2</sub> N <sub>3</sub> O <sub>2</sub>   |
| Amylene Hydrate            | Sedative          | 75-85-4     |      | C <sub>5</sub> H <sub>12</sub> O                                                |
| Amylocaine                 | Anesthetic        | 644-26-8    |      | C <sub>14</sub> H <sub>21</sub> NO <sub>2</sub>                                 |
| Anagestone Acetate         | Progestogen       | 3137-73-3   |      | C <sub>24</sub> H <sub>36</sub> O <sub>3</sub>                                  |
| Anagrelide                 | Antithrombotic    | 68475-42-3  | Y    | C <sub>10</sub> H <sub>7</sub> Cl <sub>2</sub> N <sub>3</sub> O                 |
| Anastrozole                | Antineoplastic    | 120511-73-1 | Y    | C <sub>17</sub> H <sub>19</sub> N <sub>5</sub>                                  |
| Anatibant                  | Antirheumatic     | 209733-45-9 |      | C <sub>34</sub> H <sub>36</sub> Cl <sub>2</sub> N <sub>6</sub> O <sub>5</sub> S |
| Anaxirone                  | Antineoplastic    | 99212-42-7  |      | C <sub>11</sub> H <sub>15</sub> N <sub>3</sub> O <sub>5</sub>                   |
| Anazocine                  | Analgesic         | 15378-99-1  |      | C <sub>16</sub> H <sub>23</sub> NO                                              |
| Ancarolol                  | Antihypertensive  | 75748-50-4  |      | C <sub>18</sub> H <sub>24</sub> N <sub>2</sub> O <sub>4</sub>                   |
| Ancitabine                 | Antineoplastic    | 31698-14-3  |      | C <sub>9</sub> H <sub>11</sub> N <sub>3</sub> O <sub>4</sub>                    |
| Ancriviroc                 | Antiviral         | 370893-06-4 |      | C <sub>28</sub> H <sub>37</sub> BrN <sub>4</sub> O <sub>3</sub>                 |
| Andolast                   | Bronchodilator    | 132640-22-3 |      | C <sub>15</sub> H <sub>11</sub> N <sub>9</sub> O                                |
| Androstenediol             | Steroid           | 521-17-5    |      | C <sub>19</sub> H <sub>30</sub> O <sub>2</sub>                                  |
| Androstenedione            | Steroid           | 63-05-8     |      | C <sub>19</sub> H <sub>26</sub> O <sub>2</sub>                                  |
| Anecortave Acetate         | Ophthalmic        | 7753-60-8   |      | C <sub>23</sub> H <sub>30</sub> O <sub>5</sub>                                  |
| Anethole                   | Antitussive       | 104-46-1    |      | C <sub>10</sub> H <sub>12</sub> O                                               |
| Anidoxime                  | Analgesic         | 34297-34-2  |      | C <sub>21</sub> H <sub>27</sub> N <sub>3</sub> O <sub>3</sub>                   |
| Anilamate                  | Anticonvulsant    | 5591-49-1   |      | C <sub>15</sub> H <sub>14</sub> N <sub>2</sub> O <sub>3</sub>                   |
| Anileridine                | Analgesic         | 144-14-9    |      | C <sub>22</sub> H <sub>28</sub> N <sub>2</sub> O <sub>2</sub>                   |
| Anilopam                   | Analgesic         | 53716-46-4  |      | C <sub>20</sub> H <sub>26</sub> N <sub>2</sub> O                                |
| Anipamil                   | Antianginal       | 83200-10-6  |      | C <sub>34</sub> H <sub>52</sub> N <sub>2</sub> O <sub>2</sub>                   |
| Aniracetam                 | Nootropic         | 72432-10-1  | Y    | C <sub>12</sub> H <sub>13</sub> NO <sub>3</sub>                                 |
| Anirolac                   | Antiinflammatory  | 66635-85-6  |      | C <sub>16</sub> H <sub>15</sub> NO <sub>4</sub>                                 |
| Anisacril                  | Unclassified      | 5129-14-6   |      | C <sub>22</sub> H <sub>18</sub> O <sub>3</sub>                                  |
| Anisindione                | Anticoagulant     | 117-37-3    | Y    | C <sub>16</sub> H <sub>12</sub> O <sub>3</sub>                                  |
| Anisomycin                 | Antibiotic        | 22862-76-6  |      | C <sub>14</sub> H <sub>19</sub> NO <sub>4</sub>                                 |
| Anisopirol                 | Unclassified      | 857-62-5    |      | C <sub>21</sub> H <sub>27</sub> FN <sub>2</sub> O <sub>2</sub>                  |
| Anisotropine               | Antispasmodic     | 25333-49-7  | Y    | C <sub>16</sub> H <sub>29</sub> NO <sub>2</sub>                                 |
| Anisperimus                | Immunosuppressant | 170368-04-4 |      | C <sub>18</sub> H <sub>39</sub> N <sub>7</sub> O <sub>3</sub>                   |
| Anitrazafen                | Antiinflammatory  | 63119-27-7  |      | C <sub>18</sub> H <sub>17</sub> N <sub>3</sub> O <sub>2</sub>                   |
| Anpirtoline                | Analgesic         | 98330-05-3  |      | C <sub>10</sub> H <sub>13</sub> ClN <sub>2</sub> S                              |
| Ansoxetine                 | Antidepressant    | 79130-64-6  |      | C <sub>26</sub> H <sub>25</sub> NO <sub>3</sub>                                 |
| Antafenite                 | Antiprotozoal     | 6649-73-6   |      | C <sub>11</sub> H <sub>10</sub> N <sub>2</sub> S                                |
| Antazoline                 | Antihistaminic    | 91-75-8     |      | C <sub>17</sub> H <sub>19</sub> N <sub>3</sub>                                  |
| Antazonite                 | Antihistaminic    | 5028-87-5   |      | C <sub>11</sub> H <sub>12</sub> N <sub>2</sub> O <sub>2</sub> S <sub>2</sub>    |
| Anthralin                  | Dermatologic      | 1143-38-0   |      | C <sub>14</sub> H <sub>10</sub> O <sub>3</sub>                                  |
| Anthelmycin                | Anthelminthic     | 12706-94-4  |      | C <sub>21</sub> H <sub>37</sub> N <sub>5</sub> O <sub>14</sub>                  |

Table S1. Cont.

| Common Name                    | Indication           | CAS Number  | Oral | Molecular Formula                                                             |
|--------------------------------|----------------------|-------------|------|-------------------------------------------------------------------------------|
| Anthiolimine                   | Diuretic             | 70-49-5     |      | C <sub>4</sub> H <sub>6</sub> O <sub>4</sub> S                                |
| Anthracene                     | Antineoplastic       | 120-12-7    |      | C <sub>14</sub> H <sub>10</sub>                                               |
| Anthramycin                    | Antineoplastic       | 4803-27-4   |      | C <sub>16</sub> H <sub>17</sub> N <sub>3</sub> O <sub>4</sub>                 |
| Antienite                      | Unclassified         | 5719-88-0   |      | C <sub>9</sub> H <sub>8</sub> N <sub>2</sub> S <sub>2</sub>                   |
| Antimony Sodium Thioglycollate | Anthelminthic        | 1843-43-2   |      | C <sub>4</sub> H <sub>5</sub> O <sub>4</sub> S <sub>2</sub> Sb                |
| Antipyrine                     | Antiinflammatory     | 60-80-0     |      | C <sub>11</sub> H <sub>12</sub> N <sub>2</sub> O                              |
| Antrafenine                    | Analgesic            | 55300-29-3  |      | C <sub>30</sub> H <sub>26</sub> F <sub>6</sub> N <sub>4</sub> O <sub>2</sub>  |
| Apadoline                      | Analgesic            | 135003-30-4 |      | C <sub>23</sub> H <sub>29</sub> N <sub>3</sub> OS                             |
| Apafant                        | Antithrombotic       | 105219-56-5 |      | C <sub>22</sub> H <sub>22</sub> ClN <sub>5</sub> O <sub>2</sub> S             |
| Apalcillin                     | Antibacterial        | 63469-19-2  |      | C <sub>25</sub> H <sub>23</sub> N <sub>5</sub> O <sub>6</sub> S               |
| Apaxifylline                   | Bronchodilator       | 151581-23-6 |      | C <sub>16</sub> H <sub>22</sub> N <sub>4</sub> O <sub>3</sub>                 |
| Apaziqune                      | Antineoplastic       | 114560-48-4 |      | C <sub>15</sub> H <sub>16</sub> N <sub>2</sub> O <sub>4</sub>                 |
| Apazone                        | Antiinflammatory     | 13539-59-8  | Y    | C <sub>16</sub> H <sub>20</sub> N <sub>4</sub> O <sub>2</sub>                 |
| Apicycline                     | Antibiotic           | 15599-51-6  |      | C <sub>30</sub> H <sub>38</sub> N <sub>4</sub> O <sub>11</sub>                |
| Apixaban                       | Anticoagulant        | 503612-47-3 | Y    | C <sub>25</sub> H <sub>25</sub> N <sub>5</sub> O <sub>4</sub>                 |
| Aplindore Fumarate             | Antipsychotic        | 189681-70-7 |      | C <sub>18</sub> H <sub>18</sub> N <sub>2</sub> O <sub>3</sub>                 |
| Apomorphine                    | Antiparkinsonian     | 58-00-4     |      | C <sub>17</sub> H <sub>17</sub> NO <sub>2</sub>                               |
| Apovincamine                   | Cardiotonic          | 4880-92-6   |      | C <sub>21</sub> H <sub>24</sub> N <sub>2</sub> O <sub>2</sub>                 |
| Apraclonidine                  | Ophthalmic           | 66711-21-5  |      | C <sub>9</sub> H <sub>10</sub> Cl <sub>2</sub> N <sub>4</sub>                 |
| Apramycin                      | Antibiotic           | 37321-09-8  |      | C <sub>21</sub> H <sub>41</sub> N <sub>5</sub> O <sub>11</sub>                |
| Aprastat                       | Antihyperlipidemic   | 287405-51-0 |      | C <sub>17</sub> H <sub>22</sub> N <sub>2</sub> O <sub>6</sub> S <sub>2</sub>  |
| Aprepitant                     | Antiemetic           | 170729-80-3 | Y    | C <sub>23</sub> H <sub>21</sub> F <sub>7</sub> N <sub>4</sub> O <sub>3</sub>  |
| Aprikalim                      | Cardiotonic          | 132562-26-6 |      | C <sub>12</sub> H <sub>16</sub> N <sub>2</sub> OS <sub>2</sub>                |
| Aprindine                      | Antiarrhythmic       | 37640-71-4  | Y    | C <sub>22</sub> H <sub>30</sub> N <sub>2</sub>                                |
| Aprobarbital                   | Sedative             | 77-02-1     |      | C <sub>10</sub> H <sub>14</sub> N <sub>2</sub> O <sub>3</sub>                 |
| Aprofene                       | Antihypertensive     | 3563-01-7   |      | C <sub>21</sub> H <sub>27</sub> NO <sub>2</sub>                               |
| Aptazapine Maleate             | Antidepressant       | 71576-40-4  |      | C <sub>16</sub> H <sub>19</sub> N <sub>3</sub>                                |
| Aptiganel                      | Nootropic            | 137159-92-3 |      | C <sub>20</sub> H <sub>21</sub> N <sub>3</sub>                                |
| Aptocaine                      | Anesthetic           | 19281-29-9  |      | C <sub>14</sub> H <sub>20</sub> N <sub>2</sub> O                              |
| Aranidipine                    | Antihypertensive     | 86780-90-7  |      | C <sub>19</sub> H <sub>20</sub> N <sub>2</sub> O <sub>7</sub>                 |
| Aranotin                       | Antiviral            | 19885-51-9  |      | C <sub>20</sub> H <sub>18</sub> N <sub>2</sub> O <sub>7</sub> S <sub>2</sub>  |
| Araprofen                      | Antiinflammatory     | 15250-13-2  |      | C <sub>16</sub> H <sub>15</sub> NO <sub>4</sub>                               |
| Arasertaconazole               | Antifungal           | 583057-48-1 |      | C <sub>20</sub> H <sub>15</sub> Cl <sub>3</sub> N <sub>2</sub> OS             |
| Arbaprostil                    | Antilucerative       | 55028-70-1  |      | C <sub>21</sub> H <sub>34</sub> O <sub>5</sub>                                |
| Arbekacin                      | Antibiotic           | 51025-85-5  |      | C <sub>22</sub> H <sub>44</sub> N <sub>6</sub> O <sub>10</sub>                |
| Arbutamine                     | Antihypotensive      | 128470-16-6 |      | C <sub>18</sub> H <sub>23</sub> NO <sub>4</sub>                               |
| Arbutin                        | Dermatologic         | 497-76-7    |      | C <sub>12</sub> H <sub>16</sub> O <sub>7</sub>                                |
| Arecoline                      | Anthelminthic        | 63-75-2     |      | C <sub>8</sub> H <sub>13</sub> NO <sub>2</sub>                                |
| Arfendazam                     | Anxiolytic           | 37669-57-1  |      | C <sub>18</sub> H <sub>17</sub> ClN <sub>2</sub> O <sub>3</sub>               |
| Arformoterol Tartrate          | Bronchodilator       | 67346-49-0  |      | C <sub>19</sub> H <sub>24</sub> N <sub>2</sub> O <sub>4</sub>                 |
| Argatroban                     | Anticoagulant        | 74863-84-6  |      | C <sub>23</sub> H <sub>36</sub> N <sub>6</sub> O <sub>5</sub> S               |
| Argimesna                      | Antineoplastic       | 74-79-3     |      | C <sub>6</sub> H <sub>14</sub> N <sub>4</sub> O <sub>2</sub>                  |
| Arildone                       | Antiviral            | 56219-57-9  |      | C <sub>20</sub> H <sub>29</sub> ClO <sub>4</sub>                              |
| Arimoclomol                    | Capillary Protectant | 289893-25-0 | Y    | C <sub>14</sub> H <sub>20</sub> ClN <sub>3</sub> O <sub>3</sub>               |
| Aripiprazole                   | Antipsychotic        | 129722-12-9 | Y    | C <sub>23</sub> H <sub>27</sub> Cl <sub>2</sub> N <sub>3</sub> O <sub>2</sub> |
| Armodafinil                    | Nootropic            | 112111-43-0 | Y    | C <sub>15</sub> H <sub>15</sub> NO <sub>2</sub> S                             |
| Arnolol                        | Antihypertensive     | 87129-71-3  |      | C <sub>14</sub> H <sub>23</sub> NO <sub>3</sub>                               |
| Arofylline                     | Bronchodilator       | 136145-07-8 |      | C <sub>14</sub> H <sub>13</sub> ClN <sub>4</sub> O <sub>2</sub>               |
| Aronixil                       | Antihypertensive     | 86627-15-8  |      | C <sub>14</sub> H <sub>15</sub> ClN <sub>4</sub> O <sub>2</sub>               |
| Arotinolol                     | Antianginal          | 68377-92-4  | Y    | C <sub>15</sub> H <sub>21</sub> N <sub>3</sub> O <sub>2</sub> S <sub>3</sub>  |
| Arprinocid                     | Antibacterial        | 55779-18-5  |      | C <sub>12</sub> H <sub>9</sub> ClFN <sub>5</sub>                              |
| Arpromidine                    | Analgesic            | 106669-71-0 |      | C <sub>21</sub> H <sub>25</sub> FN <sub>6</sub>                               |
| Arsanilic Acid                 | Antibacterial        | 98-50-0     |      | C <sub>6</sub> H <sub>8</sub> AsNO <sub>3</sub>                               |
| Arsphenamine                   | Antibiotic           | 150-44-7    |      | C <sub>12</sub> H <sub>12</sub> As <sub>2</sub> N <sub>2</sub> O <sub>2</sub> |
| Arsthinol                      | Antiamoebic          | 119-96-0    |      | C <sub>11</sub> H <sub>14</sub> AsNO <sub>3</sub> S <sub>2</sub>              |
| Arteflene                      | Antimalarial         | 123407-36-3 |      | C <sub>19</sub> H <sub>18</sub> F <sub>6</sub> O <sub>3</sub>                 |
| Artemether                     | Antimalarial         | 71963-77-4  | Y    | C <sub>16</sub> H <sub>26</sub> O <sub>5</sub>                                |
| Artemifone                     | Antimalarial         | 255730-18-8 |      | C <sub>19</sub> H <sub>31</sub> NO <sub>6</sub> S                             |
| Artemisinin                    | Antimalarial         | 63968-64-9  |      | C <sub>15</sub> H <sub>22</sub> O <sub>5</sub>                                |
| Artemotil                      | Antimalarial         | 75887-54-6  |      | C <sub>17</sub> H <sub>28</sub> O <sub>5</sub>                                |
| Artenimol                      | Antimalarial         | 71939-50-9  | Y    | C <sub>15</sub> H <sub>24</sub> O <sub>5</sub>                                |
| Artesunate                     | Antimalarial         | 88495-63-0  | Y    | C <sub>19</sub> H <sub>28</sub> O <sub>8</sub>                                |
| Articaine                      | Anesthetic           | 23964-58-1  |      | C <sub>13</sub> H <sub>20</sub> N <sub>2</sub> O <sub>3</sub> S               |

Table S1. Cont.

| Common Name               | Indication           | CAS Number  | Oral | Molecular Formula                                                                            |
|---------------------------|----------------------|-------------|------|----------------------------------------------------------------------------------------------|
| Artilide Fumarate         | Antiarrhythmic       | 133267-19-3 |      | C <sub>19</sub> H <sub>34</sub> N <sub>2</sub> O <sub>3</sub> S                              |
| Arundic Acid              | Nootropic            | 185517-21-9 |      | C <sub>11</sub> H <sub>22</sub> O <sub>2</sub>                                               |
| Arzoxifene                | Progestogen          | 182133-25-1 |      | C <sub>28</sub> H <sub>29</sub> NO <sub>4</sub> S                                            |
| Asenapine Maleate         | Antipsychotic        | 65576-45-6  |      | C <sub>17</sub> H <sub>16</sub> CINO                                                         |
| Aseripide                 | Antispasmodic        | 153242-02-5 |      | C <sub>26</sub> H <sub>30</sub> FN <sub>3</sub> O <sub>6</sub> S                             |
| Asimadoline               | Analgesic            | 153205-46-0 | Y    | C <sub>27</sub> H <sub>30</sub> N <sub>2</sub> O <sub>2</sub>                                |
| Asobamast                 | Antihistaminic       | 104777-03-9 |      | C <sub>13</sub> H <sub>15</sub> N <sub>3</sub> O <sub>5</sub> S                              |
| Asocainol                 | Antiarrhythmic       | 77400-65-8  |      | C <sub>27</sub> H <sub>31</sub> NO <sub>3</sub>                                              |
| Asoprisnil                | Progestogen          | 199396-76-4 |      | C <sub>28</sub> H <sub>35</sub> NO <sub>4</sub>                                              |
| Asoprisnil Ecamate        | Progestogen          | 222732-94-7 |      | C <sub>31</sub> H <sub>40</sub> N <sub>2</sub> O <sub>5</sub>                                |
| Aspartocin                | Antibacterial        | 4117-65-1   |      | C <sub>42</sub> H <sub>64</sub> N <sub>12</sub> O <sub>12</sub> S <sub>2</sub>               |
| Asperlin                  | Antibacterial        | 30387-51-0  |      | C <sub>10</sub> H <sub>12</sub> O <sub>5</sub>                                               |
| Aspirin                   | Antiinflammatory     | 50-78-2     | Y    | C <sub>9</sub> H <sub>8</sub> O <sub>4</sub>                                                 |
| Aspoxicillin              | Antibiotic           | 63358-49-6  |      | C <sub>21</sub> H <sub>27</sub> N <sub>5</sub> O <sub>7</sub> S                              |
| Astemizole                | Antihistaminic       | 68844-77-9  |      | C <sub>28</sub> H <sub>31</sub> FN <sub>4</sub> O                                            |
| Astromicin Sulfate        | Antibacterial        | 55779-06-1  |      | C <sub>17</sub> H <sub>35</sub> N <sub>5</sub> O <sub>6</sub>                                |
| Asulacrine                | Antineoplastic       | 80841-47-0  |      | C <sub>24</sub> H <sub>24</sub> N <sub>4</sub> O <sub>4</sub> S                              |
| Ataciguat                 | Vasodilator          | 254877-67-3 |      | C <sub>21</sub> H <sub>19</sub> Cl <sub>2</sub> N <sub>3</sub> O <sub>6</sub> S <sub>3</sub> |
| Atamestane                | Antineoplastic       | 96301-34-7  |      | C <sub>20</sub> H <sub>26</sub> O <sub>2</sub>                                               |
| Ataprost                  | Prostaglandin        | 83997-19-7  |      | C <sub>21</sub> H <sub>32</sub> O <sub>4</sub>                                               |
| Ataquimast                | Antihistaminic       | 586348-21-2 |      | C <sub>11</sub> H <sub>13</sub> N <sub>3</sub> O                                             |
| Atazanavir                | Antiviral            | 198904-31-3 | Y    | C <sub>38</sub> H <sub>52</sub> N <sub>6</sub> O <sub>7</sub>                                |
| Atenolol                  | Antihypertensive     | 29122-68-7  | Y    | C <sub>14</sub> H <sub>22</sub> N <sub>2</sub> O <sub>3</sub>                                |
| Ateviridine Mesylate      | Antiviral            | 136816-75-6 |      | C <sub>21</sub> H <sub>25</sub> N <sub>5</sub> O <sub>2</sub>                                |
| Atibeprone                | Anticonvulsant       | 153420-96-3 |      | C <sub>17</sub> H <sub>18</sub> N <sub>2</sub> O <sub>3</sub> S                              |
| Atipamezole               | Antihypertensive     | 104054-27-5 |      | C <sub>14</sub> H <sub>16</sub> N <sub>2</sub>                                               |
| Atiprimod Dihydrochloride | Antiarrhythmic       | 123018-47-3 |      | C <sub>22</sub> H <sub>44</sub> N <sub>2</sub>                                               |
| Atiprosin Maleate         | Antihypertensive     | 89303-63-9  |      | C <sub>20</sub> H <sub>29</sub> N <sub>3</sub>                                               |
| Atizoram                  | Dermatologic         | 135637-46-6 |      | C <sub>18</sub> H <sub>24</sub> N <sub>2</sub> O <sub>3</sub>                                |
| Atliprofen                | Antiinflammatory     | 108912-14-7 |      | C <sub>13</sub> H <sub>12</sub> O <sub>2</sub> S                                             |
| Atolide                   | Anticonvulsant       | 16231-75-7  |      | C <sub>18</sub> H <sub>23</sub> N <sub>3</sub> O                                             |
| Atomoxetine               | Nootropic            | 83015-26-3  | Y    | C <sub>17</sub> H <sub>21</sub> NO                                                           |
| Atorvastatin              | Antihyperlipidemic   | 134523-00-5 | Y    | C <sub>33</sub> H <sub>35</sub> FN <sub>2</sub> O <sub>5</sub>                               |
| Atosiban                  | Tocolytic            | 90779-69-4  |      | C <sub>43</sub> H <sub>67</sub> N <sub>11</sub> O <sub>12</sub> S <sub>2</sub>               |
| Atovaquone                | Antimalarial         | 95233-18-4  | Y    | C <sub>22</sub> H <sub>19</sub> ClO <sub>3</sub>                                             |
| Atracurium                | Anticonvulsant       | 64228-79-1  |      | C <sub>53</sub> H <sub>72</sub> N <sub>2</sub> O <sub>122+</sub>                             |
| Atrasentan                | Anesthetic           | 173937-91-2 | Y    | C <sub>29</sub> H <sub>38</sub> N <sub>2</sub> O <sub>6</sub>                                |
| Atreleuton                | Bronchodilator       | 154355-76-7 |      | C <sub>16</sub> H <sub>15</sub> FN <sub>2</sub> O <sub>2</sub> S                             |
| Atrimustine               | Antineoplastic       | 75219-46-4  |      | C <sub>41</sub> H <sub>47</sub> Cl <sub>2</sub> NO <sub>6</sub>                              |
| Atrinositol               | Vasodilator          | 28841-62-5  |      | C <sub>6</sub> H <sub>15</sub> O <sub>15</sub> P <sub>3</sub>                                |
| Atromepine                | Antispasmodic        | 428-07-9    |      | C <sub>18</sub> H <sub>25</sub> NO <sub>3</sub>                                              |
| Atropine                  | Mydriatic            | 51-55-8     |      | C <sub>17</sub> H <sub>23</sub> NO <sub>3</sub>                                              |
| Atropine Methylbromide    | Antihypotensive      | 80-49-9     | Y    | C <sub>17</sub> H <sub>13</sub> BrNO <sub>3</sub>                                            |
| Atropine Oxide            | Antihypotensive      | 4438-22-6   |      | C <sub>17</sub> H <sub>23</sub> NO <sub>4</sub>                                              |
| Auranofin                 | Antirheumatic        | 34031-32-8  | Y    | C <sub>20</sub> H <sub>34</sub> AuO <sub>9</sub> PS                                          |
| Aurothiogluucose          | Antirheumatic        | 12192-57-3  |      | C <sub>6</sub> H <sub>11</sub> AuO <sub>5</sub> S                                            |
| Aurothioglycanide         | Antirheumatic        | 16925-51-2  |      | C <sub>8</sub> H <sub>8</sub> AuNOS                                                          |
| Avanafil                  | Erectile Dysfunction | 330784-47-9 | Y    | C <sub>23</sub> H <sub>26</sub> ClN <sub>7</sub> O <sub>3</sub>                              |
| Avasimibe                 | Antihyperlipidemic   | 166518-60-1 |      | C <sub>29</sub> H <sub>43</sub> NO <sub>4</sub> S                                            |
| Avitriptan Fumarate       | Antimigraine         | 151140-96-4 |      | C <sub>22</sub> H <sub>30</sub> N <sub>6</sub> O <sub>3</sub> S                              |
| Avizafone                 | Anticonvulsant       | 65617-86-9  |      | C <sub>22</sub> H <sub>27</sub> ClN <sub>4</sub> O <sub>3</sub>                              |
| Avobenzone                | Dermatologic         | 70356-09-1  |      | C <sub>20</sub> H <sub>22</sub> O <sub>3</sub>                                               |
| Avosentan                 | Anesthetic           | 290815-26-8 |      | C <sub>23</sub> H <sub>21</sub> N <sub>5</sub> O <sub>5</sub> S                              |
| Avridine                  | Antiviral            | 35607-20-6  |      | C <sub>43</sub> H <sub>50</sub> N <sub>2</sub> O <sub>2</sub>                                |
| Axamozide                 | Antipsychotic        | 85076-06-8  |      | C <sub>21</sub> H <sub>22</sub> ClN <sub>3</sub> O <sub>3</sub>                              |
| Axitinib                  | Antineoplastic       | 319460-85-0 | Y    | C <sub>22</sub> H <sub>18</sub> N <sub>4</sub> OS                                            |
| Axitirome                 | Antihyperlipidemic   | 156740-57-7 |      | C <sub>25</sub> H <sub>24</sub> FN <sub>6</sub> O <sub>6</sub>                               |
| Axomadol                  | Analgesic            | 187219-99-4 |      | C <sub>16</sub> H <sub>25</sub> NO <sub>3</sub>                                              |
| Azabon                    | Nootropic            | 1150-20-5   |      | C <sub>14</sub> H <sub>20</sub> N <sub>2</sub> O <sub>2</sub> S                              |
| Azabuperone               | Antipsychotic        | 2856-81-7   |      | C <sub>17</sub> H <sub>23</sub> FN <sub>2</sub> O                                            |
| Azacididine               | Antineoplastic       | 320-67-2    |      | C <sub>8</sub> H <sub>12</sub> N <sub>4</sub> O <sub>5</sub>                                 |
| Azaclorzine               | Vasodilator          | 49864-70-2  |      | C <sub>22</sub> H <sub>24</sub> ClN <sub>3</sub> OS                                          |
| Azaconazole               | Antifungal           | 60207-31-0  |      | C <sub>12</sub> H <sub>11</sub> Cl <sub>2</sub> N <sub>3</sub> O <sub>2</sub>                |



Table S1. Cont.

| Common Name                | Indication         | CAS Number  | Oral | Molecular Formula                                                              |
|----------------------------|--------------------|-------------|------|--------------------------------------------------------------------------------|
| Azasterol                  | Antibacterial      | 313-05-3    |      | C <sub>25</sub> H <sub>44</sub> N <sub>2</sub> O                               |
| Azacyclonol                | Anxiolytic         | 115-46-8    |      | C <sub>18</sub> H <sub>21</sub> NO                                             |
| Azaftozine                 | Anxiolytic         | 54063-26-2  |      | C <sub>23</sub> H <sub>24</sub> F <sub>3</sub> N <sub>3</sub> OS               |
| Azalanstat Dihydrochloride | Antihyperlipidemic | 143393-27-5 |      | C <sub>22</sub> H <sub>24</sub> ClN <sub>3</sub> O <sub>2</sub> S              |
| Azaloxan Fumarate          | Antidepressant     | 72822-56-1  |      | C <sub>18</sub> H <sub>25</sub> N <sub>3</sub> O <sub>3</sub>                  |
| Azamethiphos               | Antineoplastic     | 35575-96-3  |      | C <sub>9</sub> H <sub>10</sub> ClN <sub>2</sub> O <sub>5</sub> PS              |
| Azamethonium Bromide       | Antihypertensive   | 306-53-6    |      | C <sub>13</sub> H <sub>33</sub> Br <sub>2</sub> N <sub>3</sub>                 |
| Azamulin                   | Antibacterial      | 76530-44-4  |      | C <sub>24</sub> H <sub>38</sub> N <sub>4</sub> O <sub>4</sub> S                |
| Azinator Maleate           | Bronchodilator     | 37855-92-8  |      | C <sub>18</sub> H <sub>18</sub> N <sub>2</sub> O                               |
| Azanidazole                | Antiprotozoal      | 62973-76-6  |      | C <sub>10</sub> H <sub>10</sub> N <sub>6</sub> O <sub>2</sub>                  |
| Azaperone                  | Sedative           | 1649-18-9   |      | C <sub>19</sub> H <sub>22</sub> FN <sub>3</sub> O                              |
| Azapetine Phosphate        | Anxiolytic         | 146-36-1    |      | C <sub>17</sub> H <sub>17</sub> N                                              |
| Azaprocin                  | Antibiotic         | 448-34-0    |      | C <sub>18</sub> H <sub>24</sub> N <sub>2</sub> O                               |
| Azaquinzole                | Unclassified       | 5234-86-6   |      | C <sub>12</sub> H <sub>16</sub> N <sub>2</sub>                                 |
| Azaribine                  | Dermatologic       | 2169-64-4   |      | C <sub>14</sub> H <sub>17</sub> N <sub>3</sub> O <sub>9</sub>                  |
| Azarole                    | Immunomodulator    | 55872-82-7  |      | C <sub>14</sub> H <sub>12</sub> N <sub>4</sub>                                 |
| Azaserine                  | Antifungal         | 115-02-6    |      | C <sub>5</sub> H <sub>7</sub> N <sub>3</sub> O <sub>4</sub>                    |
| Azasetron                  | Antiemetic         | 123040-69-7 |      | C <sub>17</sub> H <sub>20</sub> ClN <sub>3</sub> O <sub>3</sub>                |
| Azaspirium Chloride        | Unclassified       | 34959-30-3  |      | C <sub>22</sub> H <sub>24</sub> ClNO <sub>5</sub>                              |
| Azastene                   | Immunomodulator    | 13074-00-5  |      | C <sub>23</sub> H <sub>33</sub> NO <sub>2</sub>                                |
| Azatadine                  | Antihistaminic     | 3964-81-6   | Y    | C <sub>20</sub> H <sub>22</sub> N <sub>2</sub>                                 |
| Azathioprine               | Immunosuppressant  | 446-86-6    | Y    | C <sub>9</sub> H <sub>7</sub> N <sub>7</sub> O <sub>2</sub> S                  |
| Azelaic Acid               | Dermatologic       | 123-99-9    |      | C <sub>9</sub> H <sub>16</sub> O <sub>4</sub>                                  |
| Azelastine                 | Antihistaminic     | 58581-89-8  |      | C <sub>22</sub> H <sub>24</sub> ClN <sub>3</sub> O                             |
| Azelmidipine               | Antihypertensive   | 123524-52-7 | Y    | C <sub>33</sub> H <sub>34</sub> N <sub>4</sub> O <sub>6</sub>                  |
| Azepexole                  | Antihypertensive   | 36067-73-9  |      | C <sub>9</sub> H <sub>15</sub> N <sub>3</sub> O                                |
| Azepindole                 | Antidepressant     | 26304-61-0  |      | C <sub>12</sub> H <sub>14</sub> N <sub>2</sub>                                 |
| Azetepa                    | Antineoplastic     | 125-45-1    |      | C <sub>8</sub> H <sub>14</sub> N <sub>5</sub> OPS                              |
| Azetirelin                 | Thyroid            | 95729-65-0  |      | C <sub>15</sub> H <sub>20</sub> N <sub>6</sub> O <sub>4</sub>                  |
| Azidamfenicol              | Antibiotic         | 13838-08-9  |      | C <sub>11</sub> H <sub>13</sub> N <sub>5</sub> O <sub>5</sub>                  |
| Azidocillin                | Antibacterial      | 17243-38-8  |      | C <sub>16</sub> H <sub>17</sub> N <sub>5</sub> O <sub>4</sub> S                |
| Azimexon                   | Immunomodulator    | 64118-86-1  |      | C <sub>9</sub> H <sub>14</sub> N <sub>4</sub> O                                |
| Azimilide Dihydrochloride  | Antiarrhythmic     | 149908-53-2 | Y    | C <sub>23</sub> H <sub>28</sub> ClN <sub>5</sub> O <sub>3</sub>                |
| Azintamide                 | Choleretic         | 1830-32-6   |      | C <sub>10</sub> H <sub>14</sub> ClN <sub>3</sub> OS                            |
| Azipramine                 | Antidepressant     | 58503-82-5  |      | C <sub>26</sub> H <sub>26</sub> N <sub>2</sub>                                 |
| Azithromycin               | Antibiotic         | 83905-01-5  | Y    | C <sub>38</sub> H <sub>72</sub> N <sub>2</sub> O <sub>12</sub>                 |
| Azlocillin                 | Antibiotic         | 37091-66-0  |      | C <sub>20</sub> H <sub>23</sub> N <sub>5</sub> O <sub>6</sub> S                |
| Azolimine                  | Diuretic           | 40828-45-3  |      | C <sub>10</sub> H <sub>11</sub> N <sub>3</sub> O                               |
| Azosemide                  | Diuretic           | 27589-33-9  | Y    | C <sub>12</sub> H <sub>11</sub> ClN <sub>6</sub> O <sub>2</sub> S <sub>2</sub> |
| Azosulfamide               | Diuretic           | 132-38-7    |      | C <sub>18</sub> H <sub>16</sub> N <sub>4</sub> O <sub>10</sub> S <sub>3</sub>  |
| Azotomycin                 | Antineoplastic     | 7644-67-9   |      | C <sub>17</sub> H <sub>23</sub> N <sub>7</sub> O <sub>8</sub>                  |
| Aztreonam                  | Antibiotic         | 78110-38-0  |      | C <sub>13</sub> H <sub>17</sub> N <sub>5</sub> O <sub>8</sub> S <sub>2</sub>   |
| Azumolene Sodium           | Muscle Relaxant    | 64748-79-4  |      | C <sub>13</sub> H <sub>9</sub> BrN <sub>4</sub> O <sub>3</sub>                 |
| Bacampicillin              | Antibiotic         | 50972-17-3  | Y    | C <sub>21</sub> H <sub>27</sub> N <sub>3</sub> O <sub>7</sub> S                |
| Baclofen                   | Muscle Relaxant    | 1134-47-0   | Y    | C <sub>10</sub> H <sub>12</sub> ClNO <sub>2</sub>                              |
| Bacmecillinam              | Antibacterial      | 50846-45-2  |      | C <sub>20</sub> H <sub>31</sub> N <sub>3</sub> O <sub>6</sub> S                |
| Bakeprofen                 | Antiinflammatory   | 74168-02-8  |      | C <sub>16</sub> H <sub>14</sub> O <sub>4</sub>                                 |
| Balaglitazone              | Antidiabetic       | 199113-98-9 |      | C <sub>20</sub> H <sub>17</sub> N <sub>3</sub> O <sub>4</sub> S                |
| Balazipone                 | Antiinflammatory   | 137109-71-8 |      | C <sub>13</sub> H <sub>11</sub> NO <sub>2</sub>                                |
| Balicatib                  | Unclassified       | 354813-19-7 |      | C <sub>23</sub> H <sub>33</sub> N <sub>5</sub> O <sub>2</sub>                  |
| Balofloxacin               | Antibacterial      | 127294-70-6 |      | C <sub>20</sub> H <sub>24</sub> FN <sub>3</sub> O <sub>4</sub>                 |
| Balsalazide                | Antiinflammatory   | 80573-04-2  | Y    | C <sub>17</sub> H <sub>15</sub> N <sub>3</sub> O <sub>6</sub>                  |
| Bamaluzole                 | Nootropic          | 87034-87-5  |      | C <sub>14</sub> H <sub>12</sub> ClN <sub>3</sub> O                             |
| Bamaquimast                | Antihistaminic     | 135779-82-7 |      | C <sub>16</sub> H <sub>21</sub> N <sub>3</sub> O <sub>3</sub>                  |
| Bambuterol                 | Bronchodilator     | 81732-65-2  | Y    | C <sub>18</sub> H <sub>29</sub> N <sub>3</sub> O <sub>5</sub>                  |
| Bamethan                   | Vasodilator        | 3703-79-5   |      | C <sub>12</sub> H <sub>19</sub> NO <sub>2</sub>                                |
| Bamifylline                | Bronchodilator     | 2016-63-9   |      | C <sub>20</sub> H <sub>27</sub> N <sub>5</sub> O <sub>3</sub>                  |
| Bamipine                   | Antihistaminic     | 4945-47-5   |      | C <sub>19</sub> H <sub>24</sub> N <sub>2</sub>                                 |
| Bamirastine                | Antitussive        | 215529-47-8 |      | C <sub>31</sub> H <sub>37</sub> N <sub>5</sub> O <sub>3</sub>                  |
| Bamnidazole                | Antiprotozoal      | 31478-45-2  |      | C <sub>7</sub> H <sub>10</sub> N <sub>4</sub> O <sub>4</sub>                   |
| Baquiloprim                | Antibacterial      | 102280-35-3 |      | C <sub>17</sub> H <sub>20</sub> N <sub>6</sub>                                 |
| Barbital                   | Sedative           | 57-44-3     | Y    | C <sub>8</sub> H <sub>12</sub> N <sub>2</sub> O <sub>3</sub>                   |
| Barixibat                  | Unclassified       | 263562-28-3 |      | C <sub>42</sub> H <sub>55</sub> N <sub>5</sub> O <sub>8</sub>                  |

Table S1. Cont.

| Common Name                 | Indication                | CAS Number  | Oral | Molecular Formula                                                                           |
|-----------------------------|---------------------------|-------------|------|---------------------------------------------------------------------------------------------|
| Barmastine                  | Antihistaminic            | 99156-66-8  |      | C <sub>27</sub> H <sub>29</sub> N <sub>7</sub> O <sub>2</sub>                               |
| Barnidipine                 | Antihypertensive          | 104713-75-9 | Y    | C <sub>27</sub> H <sub>29</sub> N <sub>3</sub> O <sub>6</sub>                               |
| Barucainide                 | Antiarrhythmic            | 79784-22-8  |      | C <sub>22</sub> H <sub>30</sub> N <sub>2</sub> O <sub>2</sub>                               |
| Barusiban                   | Tocolytic                 | 285571-64-4 |      | C <sub>40</sub> H <sub>63</sub> N <sub>9</sub> O <sub>8</sub> S                             |
| Batabulin Sodium            | Antineoplastic            | 195533-53-0 |      | C <sub>13</sub> H <sub>7</sub> F <sub>6</sub> NO <sub>3</sub> S                             |
| Batanopride                 | Antiemetic                | 102670-46-2 |      | C <sub>17</sub> H <sub>26</sub> ClN <sub>3</sub> O <sub>3</sub>                             |
| Batebulast                  | Anticoagulant             | 81907-78-0  |      | C <sub>19</sub> H <sub>29</sub> N <sub>3</sub> O <sub>2</sub>                               |
| Batelapine Maleate          | Antipsychotic             | 95634-82-5  |      | C <sub>16</sub> H <sub>20</sub> N <sub>6</sub>                                              |
| Batimastat                  | Antineoplastic            | 130370-60-4 |      | C <sub>23</sub> H <sub>31</sub> N <sub>3</sub> O <sub>4</sub> S <sub>2</sub>                |
| Batoprazine                 | Antipsychotic             | 105685-11-8 |      | C <sub>13</sub> H <sub>14</sub> N <sub>2</sub> O <sub>2</sub>                               |
| Baxitazine                  | Anxiolytic                | 84386-11-8  |      | C <sub>13</sub> H <sub>14</sub> O <sub>6</sub>                                              |
| Bazedoxifene Acetate        | Bone Resorption Inhibitor | 198481-32-2 | Y    | C <sub>30</sub> H <sub>34</sub> N <sub>2</sub> O <sub>3</sub>                               |
| Bazinaprine                 | Antidepressant            | 94011-82-2  |      | C <sub>17</sub> H <sub>19</sub> N <sub>5</sub> O                                            |
| Becampanel                  | Antiseizure               | 188696-80-2 |      | C <sub>10</sub> H <sub>11</sub> N <sub>4</sub> O <sub>7</sub> P                             |
| Becanthone                  | Anthelminthic             | 15351-04-9  |      | C <sub>22</sub> H <sub>28</sub> N <sub>2</sub> O <sub>2</sub> S                             |
| Becatecarin                 | Antineoplastic            | 119673-08-4 |      | C <sub>33</sub> H <sub>34</sub> Cl <sub>2</sub> N <sub>4</sub> O <sub>7</sub>               |
| Beciparcil                  | Antithrombotic            | 130782-54-6 |      | C <sub>12</sub> H <sub>13</sub> NO <sub>3</sub> S <sub>2</sub>                              |
| Beclamide                   | Anticonvulsant            | 501-68-8    |      | C <sub>10</sub> H <sub>12</sub> ClNO                                                        |
| Becliconazole               | Antifungal                | 112893-26-2 |      | C <sub>18</sub> H <sub>12</sub> Cl <sub>2</sub> N <sub>2</sub> O                            |
| Beclobrate                  | Antihyperlipidemic        | 55937-99-0  |      | C <sub>20</sub> H <sub>23</sub> ClO <sub>3</sub>                                            |
| Beclomethasone Dipropionate | Glucocorticoid            | 5534-09-8   |      | C <sub>28</sub> H <sub>37</sub> ClO <sub>7</sub>                                            |
| Befetupitant                | Antidepressant            | 290296-68-3 |      | C <sub>29</sub> H <sub>29</sub> F <sub>6</sub> N <sub>3</sub> O <sub>2</sub>                |
| Befiperide                  | Antispasmodic             | 100927-14-8 |      | C <sub>25</sub> H <sub>31</sub> N <sub>3</sub> O <sub>2</sub>                               |
| Befloxatone                 | Antidepressant            | 134564-82-2 |      | C <sub>15</sub> H <sub>18</sub> F <sub>3</sub> NO <sub>5</sub>                              |
| Befunolol                   | Antiglaucoma              | 39552-01-7  |      | C <sub>16</sub> H <sub>21</sub> NO <sub>4</sub>                                             |
| Befuraline                  | Antidepressant            | 41717-30-0  |      | C <sub>20</sub> H <sub>20</sub> N <sub>2</sub> O <sub>2</sub>                               |
| Bekanamycin                 | Antibiotic                | 4696-76-8   |      | C <sub>18</sub> H <sub>37</sub> N <sub>5</sub> O <sub>10</sub>                              |
| Belaperidone                | Antipsychotic             | 208661-17-0 |      | C <sub>22</sub> H <sub>22</sub> FN <sub>3</sub> O <sub>2</sub>                              |
| Belarizine                  | Antihistaminic            | 52395-99-0  |      | C <sub>24</sub> H <sub>26</sub> N <sub>2</sub> O                                            |
| Belfosdil                   | Antihypertensive          | 103486-79-9 |      | C <sub>27</sub> H <sub>50</sub> O <sub>7</sub> P <sub>2</sub>                               |
| Belotecan                   | Antineoplastic            | 256411-32-2 |      | C <sub>25</sub> H <sub>27</sub> N <sub>3</sub> O <sub>4</sub>                               |
| Beloxamide                  | Antihyperlipidemic        | 15256-58-3  |      | C <sub>18</sub> H <sub>21</sub> NO <sub>2</sub>                                             |
| Beloxepin                   | Antidepressant            | 135928-30-2 |      | C <sub>19</sub> H <sub>21</sub> NO <sub>2</sub>                                             |
| Bemarinone                  | Cardiotonic               | 92210-43-0  |      | C <sub>11</sub> H <sub>12</sub> N <sub>2</sub> O <sub>3</sub>                               |
| Bemegrade                   | Nootropic                 | 64-65-3     |      | C <sub>8</sub> H <sub>13</sub> NO <sub>2</sub>                                              |
| Bemesetron                  | Antiemetic                | 40796-97-2  |      | C <sub>15</sub> H <sub>17</sub> Cl <sub>2</sub> NO <sub>2</sub>                             |
| Bemetizide                  | Antidiabetic              | 1824-52-8   |      | C <sub>15</sub> H <sub>16</sub> ClN <sub>3</sub> O <sub>4</sub> S <sub>2</sub>              |
| Beminafil                   | Antihypertensive          | 566906-50-1 |      | C <sub>25</sub> H <sub>24</sub> ClN <sub>3</sub> O <sub>3</sub> S                           |
| Bemitradine                 | Antihypertensive          | 88133-11-3  |      | C <sub>15</sub> H <sub>17</sub> N <sub>5</sub> O                                            |
| Bemoradan                   | Cardiotonic               | 112018-01-6 |      | C <sub>13</sub> H <sub>13</sub> N <sub>3</sub> O <sub>3</sub>                               |
| Bemotrizinol                | Dermatologic              | 187393-00-6 |      | C <sub>38</sub> H <sub>49</sub> N <sub>3</sub> O <sub>5</sub>                               |
| Benactyzine                 | Antispasmodic             | 302-40-9    |      | C <sub>20</sub> H <sub>25</sub> NO <sub>3</sub>                                             |
| Benafentrine                | Cardiotonic               | 35135-01-4  |      | C <sub>23</sub> H <sub>27</sub> N <sub>3</sub> O <sub>3</sub>                               |
| Benapryzine                 | Antihypertensive          | 22487-42-9  |      | C <sub>21</sub> H <sub>27</sub> NO <sub>3</sub>                                             |
| Benaxibine                  | Antineoplastic            | 27661-27-4  |      | C <sub>12</sub> H <sub>15</sub> NO <sub>6</sub>                                             |
| Benazepril                  | Antihypertensive          | 86541-75-5  | Y    | C <sub>24</sub> H <sub>28</sub> N <sub>2</sub> O <sub>5</sub>                               |
| Benazeprilat                | Antihypertensive          | 86541-78-8  |      | C <sub>22</sub> H <sub>24</sub> N <sub>2</sub> O <sub>5</sub>                               |
| Bencianol                   | Antispasmodic             | 85443-48-7  |      | C <sub>28</sub> H <sub>22</sub> O <sub>6</sub>                                              |
| Bencisteine                 | Unclassified              | 42293-72-1  |      | C <sub>15</sub> H <sub>19</sub> NO <sub>4</sub> S                                           |
| Benclonidine                | Antihypertensive          | 57647-79-7  |      | C <sub>16</sub> H <sub>13</sub> Cl <sub>2</sub> N <sub>3</sub> O                            |
| Bencyclane                  | Vasodilator               | 2179-37-5   |      | C <sub>19</sub> H <sub>31</sub> NO                                                          |
| Bendacalol Mesylate         | Antihypertensive          | 81703-42-6  |      | C <sub>20</sub> H <sub>23</sub> NO <sub>6</sub>                                             |
| Bendamustine                | Antineoplastic            | 16506-27-7  |      | C <sub>16</sub> H <sub>21</sub> Cl <sub>2</sub> N <sub>3</sub> O <sub>2</sub>               |
| Bendazac                    | Antiinflammatory          | 20187-55-7  |      | C <sub>16</sub> H <sub>14</sub> N <sub>2</sub> O <sub>3</sub>                               |
| Bendazol                    | Vasodilator               | 621-72-7    | Y    | C <sub>14</sub> H <sub>12</sub> N <sub>2</sub>                                              |
| Benderizine                 | Vasodilator               | 59752-23-7  |      | C <sub>28</sub> H <sub>34</sub> N <sub>2</sub> O <sub>2</sub>                               |
| Bendroflumethiazide         | Diuretic                  | 73-48-3     | Y    | C <sub>15</sub> H <sub>14</sub> F <sub>3</sub> N <sub>3</sub> O <sub>4</sub> S <sub>2</sub> |
| Benethamine Penicillin      | Antibacterial             | 3647-71-0   |      | C <sub>15</sub> H <sub>17</sub> N                                                           |
| Benexate                    | Ant ulcerative            | 78718-52-2  |      | C <sub>23</sub> H <sub>27</sub> N <sub>3</sub> O <sub>4</sub>                               |
| Benfluorex                  | Antihyperlipidemic        | 23602-78-0  |      | C <sub>19</sub> H <sub>20</sub> F <sub>3</sub> NO <sub>2</sub>                              |
| Benfosformin                | Antidiabetic              | 738523-03-0 |      | C <sub>9</sub> H <sub>14</sub> N <sub>5</sub> O <sub>3</sub> P                              |
| Benfurodil Hemisuccinate    | Cardiotonic               | 3447-95-8   |      | C <sub>19</sub> H <sub>18</sub> O <sub>7</sub>                                              |
| Benhepazone                 | Unclassified              | 363-13-3    |      | C <sub>15</sub> H <sub>12</sub> N <sub>2</sub> O                                            |

Table S1. Cont.

| Common Name                 | Indication           | CAS Number  | Oral | Molecular Formula                                                               |
|-----------------------------|----------------------|-------------|------|---------------------------------------------------------------------------------|
| Benidipine                  | Antihypertensive     | 105979-17-7 | Y    | C <sub>28</sub> H <sub>31</sub> N <sub>3</sub> O <sub>6</sub>                   |
| Benmoxin                    | Antidepressant       | 7654-03-7   |      | C <sub>15</sub> H <sub>16</sub> N <sub>2</sub> O                                |
| Benolizime                  | Antibiotic           | 61864-30-0  |      | C <sub>19</sub> H <sub>26</sub> N <sub>2</sub> O <sub>3</sub>                   |
| Benorilate                  | Analgesic            | 5003-48-5   |      | C <sub>17</sub> H <sub>15</sub> NO <sub>5</sub>                                 |
| Benorterone                 | Steroid              | 3570-10-3   |      | C <sub>19</sub> H <sub>28</sub> O <sub>2</sub>                                  |
| Benoxafos                   | Antineoplastic       | 16759-59-4  |      | C <sub>12</sub> H <sub>14</sub> Cl <sub>2</sub> NO <sub>3</sub> PS <sub>2</sub> |
| Benoxaprofen                | Antiinflammatory     | 51234-28-7  |      | C <sub>16</sub> H <sub>12</sub> ClNO <sub>3</sub>                               |
| Benoxinate                  | Anesthetic           | 99-43-4     |      | C <sub>17</sub> H <sub>28</sub> N <sub>2</sub> O <sub>3</sub>                   |
| Benperidol                  | Antipsychotic        | 2062-84-2   |      | C <sub>22</sub> H <sub>24</sub> FN <sub>3</sub> O <sub>2</sub>                  |
| Benproperine                | Antitussive          | 2156-27-6   |      | C <sub>21</sub> H <sub>27</sub> NO                                              |
| Benrixate                   | Unclassified         | 24671-26-9  |      | C <sub>19</sub> H <sub>30</sub> N <sub>2</sub> O <sub>2</sub>                   |
| Benserazide                 | Antiparkinsonian     | 322-35-0    |      | C <sub>10</sub> H <sub>15</sub> N <sub>3</sub> O <sub>5</sub>                   |
| Bensulide                   | Antiinflammatory     | 741-58-2    |      | C <sub>14</sub> H <sub>24</sub> NO <sub>4</sub> PS <sub>3</sub>                 |
| Bentazepam                  | Sedative             | 29462-18-8  |      | C <sub>17</sub> H <sub>16</sub> N <sub>2</sub> OS                               |
| Bentemazole                 | Antifungal           | 63927-95-7  |      | C <sub>11</sub> H <sub>10</sub> N <sub>6</sub>                                  |
| Bentipimine                 | Analgesic            | 17692-23-8  |      | C <sub>27</sub> H <sub>31</sub> ClN <sub>2</sub> S                              |
| Benurestat                  | Antibacterial        | 38274-54-3  |      | C <sub>9</sub> H <sub>9</sub> ClN <sub>2</sub> O <sub>3</sub>                   |
| Benzaprinoxide              | Antidepressant       | 52758-02-8  |      | C <sub>20</sub> H <sub>20</sub> ClNO                                            |
| Benzarone                   | Capillary Protectant | 1477-19-6   |      | C <sub>17</sub> H <sub>14</sub> O <sub>3</sub>                                  |
| Benzbromarone               | Uricosuric           | 3562-84-3   | Y    | C <sub>17</sub> H <sub>12</sub> Br <sub>2</sub> O <sub>3</sub>                  |
| Benzestrol                  | Estrogen             | 85-95-0     |      | C <sub>20</sub> H <sub>26</sub> O <sub>2</sub>                                  |
| Benzethidine                | Antihypertensive     | 3691-78-9   |      | C <sub>23</sub> H <sub>29</sub> NO <sub>3</sub>                                 |
| Benzetimide                 | Antihypertensive     | 14051-33-3  |      | C <sub>23</sub> H <sub>26</sub> N <sub>2</sub> O <sub>2</sub>                   |
| Benzilonium Bromide         | Antihypertensive     | 1050-48-2   |      | C <sub>22</sub> H <sub>28</sub> NO <sub>3</sub> .Br                             |
| Benzindopyrine              | Antipsychotic        | 16571-59-8  |      | C <sub>22</sub> H <sub>20</sub> N <sub>2</sub>                                  |
| Benziodarone                | Vasodilator          | 68-90-6     |      | C <sub>17</sub> H <sub>12</sub> I <sub>2</sub> O <sub>3</sub>                   |
| Benzmalecene                | Antihyperlipidemic   | 148-07-2    |      | C <sub>20</sub> H <sub>19</sub> Cl <sub>2</sub> NO <sub>3</sub>                 |
| Benznidazole                | Antiprotozoal        | 22994-85-0  | Y    | C <sub>12</sub> H <sub>12</sub> N <sub>4</sub> O <sub>3</sub>                   |
| Benzobarbital               | Sedative             | 744-80-9    |      | C <sub>19</sub> H <sub>16</sub> N <sub>2</sub> O <sub>4</sub>                   |
| Benzocaine                  | Anesthetic           | 94-09-7     |      | C <sub>9</sub> H <sub>11</sub> NO <sub>2</sub>                                  |
| Benzoclidine                | Antihypertensive     | 16852-81-6  |      | C <sub>14</sub> H <sub>17</sub> NO <sub>2</sub>                                 |
| Benzoctamine                | Muscle Relaxant      | 17243-39-9  |      | C <sub>18</sub> H <sub>19</sub> N                                               |
| Benzodepa                   | Antineoplastic       | 1980-45-6   |      | C <sub>12</sub> H <sub>16</sub> N <sub>3</sub> O <sub>3</sub> P                 |
| Benzomethamine Chloride     | Antihypotensive      | 510-08-7    |      | C <sub>22</sub> H <sub>31</sub> ClN <sub>2</sub> O <sub>2</sub>                 |
| Benzonate                   | Antitussive          | 104-31-4    | Y    | C <sub>30</sub> H <sub>53</sub> NO <sub>11</sub>                                |
| Benzotript                  | Gastroprokinetic     | 39544-74-6  |      | C <sub>18</sub> H <sub>15</sub> ClN <sub>2</sub> O <sub>3</sub>                 |
| Benzoyl Peroxide            | Dermatologic         | 94-36-0     |      | C <sub>14</sub> H <sub>10</sub> O <sub>4</sub>                                  |
| Benzoylpas Calcium          | Antibacterial        | 13898-58-3  |      | C <sub>14</sub> H <sub>11</sub> NO <sub>4</sub>                                 |
| Benzphetamine               | Anorexic             | 156-08-1    | Y    | C <sub>17</sub> H <sub>21</sub> N                                               |
| Benzpiperylon               | Antiinflammatory     | 53-89-4     |      | C <sub>22</sub> H <sub>25</sub> N <sub>3</sub> O                                |
| Benzpyrinium Bromide        | Cholinergic          | 587-46-2    |      | C <sub>15</sub> H <sub>17</sub> BrN <sub>2</sub> O <sub>2</sub>                 |
| Benzquercin                 | Capillary Protectant | 13157-90-9  |      | C <sub>50</sub> H <sub>40</sub> O <sub>7</sub>                                  |
| Benzquinamide               | Antipsychotic        | 63-12-7     |      | C <sub>22</sub> H <sub>32</sub> N <sub>2</sub> O <sub>5</sub>                   |
| Benzthiazide                | Diuretic             | 91-33-8     | Y    | C <sub>15</sub> H <sub>14</sub> ClN <sub>3</sub> O <sub>4</sub> S <sub>3</sub>  |
| Benztropine                 | Antiparkinsonian     | 86-13-5     | Y    | C <sub>21</sub> H <sub>25</sub> NO                                              |
| Benzydamine                 | Analgesic            | 642-72-8    |      | C <sub>19</sub> H <sub>23</sub> N <sub>3</sub> O                                |
| Benzyl Benzoate             | Dermatologic         | 120-51-4    |      | C <sub>14</sub> H <sub>12</sub> O <sub>2</sub>                                  |
| Benzyl Nicotinate           | Dermatologic         | 94-44-0     |      | C <sub>13</sub> H <sub>11</sub> NO <sub>2</sub>                                 |
| Benzyl Salicylate           | Ant ulcerative       | 118-58-1    |      | C <sub>14</sub> H <sub>12</sub> O <sub>3</sub>                                  |
| Benzylhydrochlorothiazide   | Diuretic             | 1824-50-6   |      | C <sub>14</sub> H <sub>14</sub> ClN <sub>3</sub> O <sub>4</sub> S <sub>2</sub>  |
| Benzylpenicillin            | Antibiotic           | 61-33-6     |      | C <sub>16</sub> H <sub>18</sub> N <sub>2</sub> O <sub>4</sub> S                 |
| Bepafant                    | Antithrombotic       | 114776-28-2 |      | C <sub>23</sub> H <sub>22</sub> ClN <sub>3</sub> O <sub>2</sub> S               |
| Beperidium Iodide           | Antibiotic           | 86434-57-3  |      | C <sub>23</sub> H <sub>34</sub> IN <sub>3</sub> O <sub>3</sub>                  |
| Bephenium Hydroxynaphthoate | Anthelminthic        | 3818-50-6   |      | C <sub>28</sub> H <sub>29</sub> NO <sub>4</sub>                                 |
| Bepiastine                  | Antihistaminic       | 10189-94-3  |      | C <sub>16</sub> H <sub>17</sub> N <sub>3</sub> OS                               |
| Bepotastine                 | Antihistaminic       | 125602-71-3 |      | C <sub>21</sub> H <sub>25</sub> ClN <sub>2</sub> O <sub>3</sub>                 |
| Bepridil                    | Antianginal          | 64706-54-3  | Y    | C <sub>24</sub> H <sub>34</sub> N <sub>2</sub> O                                |
| Beraprost Sodium            | Prostaglandin        | 88430-50-6  | Y    | C <sub>24</sub> H <sub>30</sub> O <sub>5</sub>                                  |
| Berberine                   | Antiprotozoal        | 2086-83-1   |      | C <sub>20</sub> H <sub>18</sub> N <sub>3</sub> O <sub>4</sub> +                 |
| Berefrine                   | Mydriatic            | 105567-83-7 |      | C <sub>14</sub> H <sub>21</sub> NO <sub>2</sub>                                 |
| Bergenin                    | Ant ulcerative       | 477-90-7    |      | C <sub>14</sub> H <sub>16</sub> O <sub>9</sub>                                  |
| Berlafenone                 | Antiarrhythmic       | 18965-97-4  |      | C <sub>19</sub> H <sub>25</sub> NO <sub>2</sub>                                 |
| Bermopfen                   | Antiinflammatory     | 78499-27-1  |      | C <sub>18</sub> H <sub>16</sub> O <sub>4</sub>                                  |

Table S1. Cont.

| Common Name                       | Indication           | CAS Number  | Oral | Molecular Formula                                                                 |
|-----------------------------------|----------------------|-------------|------|-----------------------------------------------------------------------------------|
| Bertosamil                        | Antiarrhythmic       | 126825-36-3 |      | C <sub>19</sub> H <sub>36</sub> N <sub>2</sub>                                    |
| Berupipam                         | Antipsychotic        | 150490-85-0 |      | C <sub>19</sub> H <sub>19</sub> BrClNO <sub>2</sub>                               |
| Bervastatin                       | Antihyperlipidemic   | 132017-01-7 |      | C <sub>28</sub> H <sub>31</sub> FO <sub>5</sub>                                   |
| Berythromycin                     | Antiamebic           | 527-75-3    |      | C <sub>37</sub> H <sub>67</sub> NO <sub>12</sub>                                  |
| Besipirdine                       | Nootropic            | 119257-34-0 |      | C <sub>16</sub> H <sub>17</sub> N <sub>3</sub>                                    |
| Besonprodil                       | Antiparkinsonian     | 253450-09-8 |      | C <sub>21</sub> H <sub>23</sub> FN <sub>2</sub> O <sub>3</sub> S                  |
| Besulpamide                       | Diuretic             | 90992-25-9  |      | C <sub>15</sub> H <sub>16</sub> ClN <sub>3</sub> O <sub>3</sub> S                 |
| Besunide                          | Glucocorticoid       | 36148-38-6  |      | C <sub>18</sub> H <sub>22</sub> N <sub>2</sub> O <sub>4</sub> S                   |
| Betacetylmethadol                 | Analgesic            | 17199-59-6  |      | C <sub>23</sub> H <sub>31</sub> NO <sub>2</sub>                                   |
| Betahistine                       | Vasodilator          | 5638-76-6   |      | C <sub>8</sub> H <sub>12</sub> N <sub>2</sub>                                     |
| Betaine                           | Antidote             | 107-43-7    | Y    | C <sub>5</sub> H <sub>11</sub> NO <sub>2</sub>                                    |
| Betameprodine                     | Analgesic            | 468-50-8    |      | C <sub>17</sub> H <sub>25</sub> NO <sub>2</sub>                                   |
| Betamethadol                      | Glucocorticoid       | 17199-55-2  |      | C <sub>21</sub> H <sub>29</sub> NO                                                |
| Betamethasone                     | Glucocorticoid       | 378-44-9    |      | C <sub>22</sub> H <sub>29</sub> FO <sub>5</sub>                                   |
| Betamethasone Acetate             | Glucocorticoid       | 987-24-6    |      | C <sub>24</sub> H <sub>31</sub> FO <sub>6</sub>                                   |
| Betamethasone Acibutate           | Glucocorticoid       | 5534-05-4   |      | C <sub>28</sub> H <sub>37</sub> FO <sub>7</sub>                                   |
| Betamethasone Benzoate            | Glucocorticoid       | 22298-29-9  |      | C <sub>29</sub> H <sub>33</sub> FO <sub>6</sub>                                   |
| Betamethasone Butyrate Propionate | Glucocorticoid       | 5534-02-1   |      | C <sub>29</sub> H <sub>39</sub> FO <sub>7</sub>                                   |
| Betamethasone Dipropionate        | Glucocorticoid       | 5593-20-4   |      | C <sub>28</sub> H <sub>37</sub> FO <sub>7</sub>                                   |
| Betamethasone Sodium Phosphate    | Glucocorticoid       | 360-63-4    |      | C <sub>22</sub> H <sub>30</sub> FO <sub>8</sub> P                                 |
| Betamethasone Valerate            | Glucocorticoid       | 2152-44-5   |      | C <sub>27</sub> H <sub>37</sub> FO <sub>6</sub>                                   |
| Betamicin Sulfate                 | Antibacterial        | 36889-15-3  |      | C <sub>19</sub> H <sub>38</sub> N <sub>4</sub> O <sub>10</sub>                    |
| Betamipron                        | Antibacterial        | 3440-28-6   |      | C <sub>10</sub> H <sub>11</sub> NO <sub>3</sub>                                   |
| Betaprodine                       | Analgesic            | 468-59-7    |      | C <sub>16</sub> H <sub>23</sub> NO <sub>2</sub>                                   |
| Betaxolol                         | Antianginal          | 63659-18-7  | Y    | C <sub>18</sub> H <sub>29</sub> NO <sub>3</sub>                                   |
| Bethanechol                       | Cholinergic          | 674-38-4    | Y    | C <sub>7</sub> H <sub>17</sub> N <sub>2</sub> O <sub>2</sub>                      |
| Bethanidine                       | Antihypertensive     | 55-73-2     | Y    | C <sub>10</sub> H <sub>15</sub> N <sub>3</sub>                                    |
| Betoxycaine                       | Anesthetic           | 3818-62-0   |      | C <sub>19</sub> H <sub>32</sub> N <sub>2</sub> O <sub>4</sub>                     |
| Bevantolol                        | Antianginal          | 59170-23-9  |      | C <sub>20</sub> H <sub>27</sub> NO <sub>4</sub>                                   |
| Bevonium Metilsulfate             | Antihypotensive      | 5205-82-3   |      | C <sub>22</sub> H <sub>28</sub> NO <sub>3</sub> .CH <sub>3</sub> O <sub>4</sub> S |
| Bexarotene                        | Antineoplastic       | 153559-49-0 | Y    | C <sub>24</sub> H <sub>28</sub> O <sub>2</sub>                                    |
| Bexlosteride                      | Antineoplastic       | 148905-78-6 | Y    | C <sub>14</sub> H <sub>16</sub> ClNO                                              |
| Bezafibrate                       | Antihyperlipidemic   | 41859-67-0  | Y    | C <sub>19</sub> H <sub>20</sub> ClNO <sub>4</sub>                                 |
| Beziramide                        | Analgesic            | 15301-48-1  |      | C <sub>31</sub> H <sub>32</sub> N <sub>4</sub> O <sub>2</sub>                     |
| Bialamicol                        | Antiamebic           | 493-75-4    | Y    | C <sub>28</sub> H <sub>40</sub> N <sub>2</sub> O <sub>2</sub>                     |
| Biapenem                          | Antibacterial        | 120410-24-4 |      | C <sub>15</sub> H <sub>18</sub> N <sub>4</sub> O <sub>4</sub> S                   |
| Bibenzonium Bromide               | Antitussive          | 15585-70-3  | Y    | C <sub>19</sub> H <sub>26</sub> BrNO                                              |
| Bibrocathol                       | Unclassified         | 6915-57-7   |      | C <sub>6</sub> HBiBr <sub>4</sub> O <sub>3</sub>                                  |
| Bicalutamide                      | Antineoplastic       | 90357-06-5  | Y    | C <sub>18</sub> H <sub>14</sub> F <sub>4</sub> N <sub>2</sub> O <sub>4</sub> S    |
| Bicifadine                        | Analgesic            | 71195-57-8  | Y    | C <sub>12</sub> H <sub>15</sub> N                                                 |
| Biclodil                          | Antihypertensive     | 85125-49-1  |      | C <sub>8</sub> H <sub>8</sub> Cl <sub>2</sub> N <sub>4</sub> O                    |
| Biclofibrate                      | Antihyperlipidemic   | 54063-27-3  |      | C <sub>20</sub> H <sub>21</sub> Cl <sub>2</sub> NO <sub>4</sub>                   |
| Bicozamycin                       | Antibiotic           | 38129-37-2  |      | C <sub>12</sub> H <sub>18</sub> N <sub>2</sub> O <sub>7</sub>                     |
| Bidimazium Iodide                 | Unclassified         | 21817-73-2  |      | C <sub>26</sub> H <sub>25</sub> N <sub>2</sub> S.I                                |
| Bidisomide                        | Antiarrhythmic       | 116078-65-0 |      | C <sub>22</sub> H <sub>34</sub> ClN <sub>3</sub> O <sub>2</sub>                   |
| Bietamiverine                     | Antispasmodic        | 479-81-2    |      | C <sub>19</sub> H <sub>30</sub> N <sub>2</sub> O <sub>2</sub>                     |
| Bietaserpine                      | Antihypertensive     | 53-18-9     |      | C <sub>39</sub> H <sub>53</sub> N <sub>3</sub> O <sub>9</sub>                     |
| Bifemelane                        | Nootropic            | 90293-01-9  |      | C <sub>18</sub> H <sub>23</sub> NO                                                |
| Bifepramide                       | Analgesic            | 70976-76-0  |      | C <sub>21</sub> H <sub>28</sub> N <sub>2</sub> O                                  |
| Bifeprufen                        | Antiinflammatory     | 108210-73-7 |      | C <sub>22</sub> H <sub>25</sub> ClN <sub>2</sub> O <sub>3</sub>                   |
| Bifeprunox                        | Antipsychotic        | 350992-10-8 |      | C <sub>24</sub> H <sub>23</sub> N <sub>3</sub> O <sub>2</sub>                     |
| Bifluranol                        | Steroid              | 34633-34-6  |      | C <sub>17</sub> H <sub>18</sub> F <sub>2</sub> O <sub>2</sub>                     |
| Bifonazole                        | Antifungal           | 60628-96-8  |      | C <sub>22</sub> H <sub>18</sub> N <sub>2</sub>                                    |
| Bilastine                         | Antihistaminic       | 202189-78-4 | Y    | C <sub>28</sub> H <sub>37</sub> N <sub>3</sub> O <sub>3</sub>                     |
| Bimakalim                         | Antihypertensive     | 117545-11-6 |      | C <sub>17</sub> H <sub>14</sub> N <sub>2</sub> O <sub>2</sub>                     |
| Bimatoprost                       | Antiglaucoma         | 155206-00-1 |      | C <sub>25</sub> H <sub>37</sub> NO <sub>4</sub>                                   |
| Bimethoxycaïne Lactate            | Analgesic            | 47302-54-5  |      | C <sub>20</sub> H <sub>27</sub> NO <sub>2</sub>                                   |
| Bimoclolmol                       | Capillary Protectant | 130493-03-7 |      | C <sub>14</sub> H <sub>20</sub> ClN <sub>3</sub> O <sub>2</sub>                   |
| Bimosiamose                       | Antiinflammatory     | 187269-40-5 |      | C <sub>46</sub> H <sub>54</sub> O <sub>16</sub>                                   |
| Bindarit                          | Antirheumatic        | 130641-38-2 |      | C <sub>19</sub> H <sub>20</sub> N <sub>2</sub> O <sub>3</sub>                     |
| Binedaline                        | Antidepressant       | 60662-16-0  |      | C <sub>19</sub> H <sub>23</sub> N <sub>3</sub>                                    |
| Binfloxacin                       | Antibacterial        | 108437-28-1 |      | C <sub>19</sub> H <sub>22</sub> FN <sub>3</sub> O <sub>3</sub>                    |
| Binifibrate                       | Antihyperlipidemic   | 69047-39-8  | Y    | C <sub>25</sub> H <sub>23</sub> ClN <sub>2</sub> O <sub>7</sub>                   |

Table S1. Cont.

| Common Name                    | Indication         | CAS Number  | Oral | Molecular Formula                                                             |
|--------------------------------|--------------------|-------------|------|-------------------------------------------------------------------------------|
| Binizolast                     | Bronchodilator     | 86662-54-6  |      | C <sub>18</sub> H <sub>23</sub> N <sub>5</sub> O                              |
| Binodenoson                    | Vasodilator        | 144348-08-3 |      | C <sub>17</sub> H <sub>25</sub> N <sub>7</sub> O <sub>4</sub>                 |
| Binospirone Mesylate           | Anxiolytic         | 102908-59-8 |      | C <sub>20</sub> H <sub>26</sub> N <sub>2</sub> O <sub>4</sub>                 |
| Bioresmethrin                  | Dermatologic       | 28434-01-7  |      | C <sub>22</sub> H <sub>26</sub> O <sub>3</sub>                                |
| Bipenamol                      | Antidepressant     | 79467-22-4  |      | C <sub>14</sub> H <sub>15</sub> NOS                                           |
| Biperiden                      | Antiparkinsonian   | 514-65-8    | Y    | C <sub>21</sub> H <sub>29</sub> NO                                            |
| Biphenamine                    | Anesthetic         | 3572-52-9   |      | C <sub>19</sub> H <sub>23</sub> NO <sub>3</sub>                               |
| Biricodar                      | Antineoplastic     | 159997-94-1 |      | C <sub>34</sub> H <sub>41</sub> N <sub>3</sub> O <sub>7</sub>                 |
| Biriperone                     | Antipsychotic      | 42021-34-1  |      | C <sub>24</sub> H <sub>26</sub> FN <sub>3</sub> O                             |
| Bisacodyl                      | Laxative           | 603-50-9    | Y    | C <sub>22</sub> H <sub>19</sub> NO <sub>4</sub>                               |
| Bisantrene                     | Antineoplastic     | 78186-34-2  |      | C <sub>22</sub> H <sub>22</sub> N <sub>8</sub>                                |
| Bisaramil                      | Antiarrhythmic     | 89194-77-4  |      | C <sub>17</sub> H <sub>23</sub> ClN <sub>2</sub> O <sub>2</sub>               |
| Bisbendazole                   | Antifungal         | 32195-33-8  |      | C <sub>28</sub> H <sub>28</sub> N <sub>6</sub> S <sub>4</sub>                 |
| Bisdequalinium Diacetate       | Antibacterial      | 3785-44-2   |      | C <sub>44</sub> H <sub>64</sub> N <sub>4</sub> O <sub>4</sub>                 |
| Bisfenazone                    | Antiinflammatory   | 55837-24-6  |      | C <sub>25</sub> H <sub>29</sub> N <sub>5</sub> O <sub>2</sub>                 |
| Bisfentidine                   | Antihistaminic     | 96153-56-9  |      | C <sub>14</sub> H <sub>18</sub> N <sub>4</sub>                                |
| Bismuth Sodium Triglycollamate | Immunomodulator    | 738525-05-8 |      | C <sub>6</sub> H <sub>8</sub> BiNO <sub>7</sub>                               |
| Bismuth Sodium Triglycollamate | Immunomodulator    | 139-13-9    |      | C <sub>6</sub> H <sub>9</sub> NO <sub>6</sub>                                 |
| Bismuth Subsalicylate          | Antidiarrheal      | 14882-18-9  |      | C <sub>7</sub> H <sub>5</sub> BiO <sub>4</sub>                                |
| Bisnafide Dimesylate           | Antineoplastic     | 144849-63-8 |      | C <sub>32</sub> H <sub>28</sub> N <sub>6</sub> O <sub>8</sub>                 |
| Bisobrin Lactate               | Anticoagulant      | 22407-74-5  |      | C <sub>26</sub> H <sub>36</sub> N <sub>2</sub> O <sub>4</sub>                 |
| Bisoctrazole                   | Dermatologic       | 103597-45-1 |      | C <sub>41</sub> H <sub>50</sub> N <sub>6</sub> O <sub>2</sub>                 |
| Bisoprolol                     | Antihypertensive   | 66722-44-9  | Y    | C <sub>18</sub> H <sub>31</sub> NO <sub>4</sub>                               |
| Bisoxatin Acetate              | Laxative           | 14008-48-1  |      | C <sub>24</sub> H <sub>19</sub> NO <sub>6</sub>                               |
| Bithionolate Sodium            | Antibacterial      | 97-18-7     |      | C <sub>12</sub> H <sub>6</sub> Cl <sub>4</sub> O <sub>2</sub> S               |
| Bithionoloxide                 | Anthelmintic       | 844-26-8    |      | C <sub>12</sub> H <sub>6</sub> Cl <sub>4</sub> O <sub>3</sub> S               |
| Bitipazone                     | Antiinflammatory   | 13456-08-1  |      | C <sub>20</sub> H <sub>38</sub> N <sub>8</sub> S <sub>2</sub>                 |
| Bitolterol                     | Bronchodilator     | 30392-40-6  |      | C <sub>28</sub> H <sub>31</sub> NO <sub>5</sub>                               |
| Bitoscanate                    | Anthelmintic       | 4044-65-9   |      | C <sub>8</sub> H <sub>4</sub> N <sub>2</sub> S <sub>2</sub>                   |
| Bizelesin                      | Antineoplastic     | 129655-21-6 |      | C <sub>43</sub> H <sub>36</sub> Cl <sub>2</sub> N <sub>8</sub> O <sub>5</sub> |
| Blastomycin                    | Antifungal         | 522-70-3    |      | C <sub>26</sub> H <sub>36</sub> N <sub>2</sub> O <sub>9</sub>                 |
| Blonanserin                    | Antipsychotic      | 132810-10-7 | Y    | C <sub>23</sub> H <sub>30</sub> FN <sub>3</sub>                               |
| Bluensomycin                   | Antineoplastic     | 11011-72-6  |      | C <sub>21</sub> H <sub>39</sub> N <sub>5</sub> O <sub>14</sub>                |
| Bofumustine                    | Antineoplastic     | 55102-44-8  |      | C <sub>18</sub> H <sub>21</sub> ClN <sub>4</sub> O <sub>9</sub>               |
| Bolandiol Dipropionate         | Steroid            | 1986-53-4   |      | C <sub>24</sub> H <sub>36</sub> O <sub>4</sub>                                |
| Bolasterone                    | Steroid            | 1605-89-6   |      | C <sub>21</sub> H <sub>32</sub> O <sub>2</sub>                                |
| Bolazine                       | Antiinflammatory   | 4267-81-6   |      | C <sub>40</sub> H <sub>64</sub> N <sub>2</sub> O <sub>2</sub>                 |
| Boldenone Undecylenate         | Steroid            | 13103-34-9  |      | C <sub>30</sub> H <sub>44</sub> O <sub>3</sub>                                |
| Bolenol                        | Steroid            | 16915-78-9  |      | C <sub>20</sub> H <sub>32</sub> O                                             |
| Bolmantalate                   | Steroid            | 1491-81-2   |      | C <sub>29</sub> H <sub>40</sub> O <sub>3</sub>                                |
| Bometolol                      | Antiarrhythmic     | 65008-93-7  |      | C <sub>25</sub> H <sub>32</sub> N <sub>2</sub> O <sub>7</sub>                 |
| Bopindolol                     | Antihypertensive   | 62658-63-3  | Y    | C <sub>23</sub> H <sub>28</sub> N <sub>2</sub> O <sub>3</sub>                 |
| Bornaprine                     | Antihypertensive   | 20448-86-6  |      | C <sub>21</sub> H <sub>31</sub> NO <sub>2</sub>                               |
| Bornaprolol                    | Antihypertensive   | 66451-06-7  |      | C <sub>19</sub> H <sub>29</sub> NO <sub>2</sub>                               |
| Bortezomib                     | Antineoplastic     | 179324-69-7 |      | C <sub>19</sub> H <sub>25</sub> N <sub>4</sub> O <sub>4</sub>                 |
| Bosentan                       | Anticoagulant      | 147536-97-8 | Y    | C <sub>27</sub> H <sub>29</sub> N <sub>5</sub> O <sub>6</sub> S               |
| Bosutinib                      | Antineoplastic     | 380843-75-4 | Y    | C <sub>26</sub> H <sub>29</sub> Cl <sub>2</sub> N <sub>5</sub> O <sub>3</sub> |
| Botiacrine                     | Nootropic          | 4774-53-2   |      | C <sub>20</sub> H <sub>24</sub> N <sub>2</sub> OS                             |
| Boxidine                       | Antihyperlipidemic | 10355-14-3  |      | C <sub>19</sub> H <sub>20</sub> F <sub>3</sub> NO                             |
| Brallobarbital                 | Sedative           | 561-86-4    |      | C <sub>10</sub> H <sub>11</sub> BrN <sub>2</sub> O <sub>3</sub>               |
| Brasofensine                   | Antiparkinsonian   | 171655-91-7 |      | C <sub>16</sub> H <sub>20</sub> Cl <sub>2</sub> N <sub>2</sub> O              |
| Brazergoline                   | Antiparkinsonian   | 60019-20-7  |      | C <sub>23</sub> H <sub>30</sub> BrN <sub>3</sub> O <sub>2</sub>               |
| Brecanavir                     | Antiviral          | 313682-08-5 |      | C <sub>33</sub> H <sub>41</sub> N <sub>3</sub> O <sub>10</sub> S <sub>2</sub> |
| Brefonalol                     | Antiarrhythmic     | 103880-26-8 |      | C <sub>22</sub> H <sub>28</sub> N <sub>2</sub> O <sub>2</sub>                 |
| Bremazocine                    | Analgesic          | 75684-07-0  |      | C <sub>20</sub> H <sub>29</sub> NO <sub>2</sub>                               |
| Brequinar Sodium               | Antineoplastic     | 96187-53-0  |      | C <sub>23</sub> H <sub>15</sub> F <sub>2</sub> NO <sub>2</sub>                |
| Bretazenil                     | Anxiolytic         | 84379-13-5  |      | C <sub>19</sub> H <sub>20</sub> BrN <sub>3</sub> O <sub>3</sub>               |
| Bretylum                       | Antiarrhythmic     | 59-41-6     |      | C <sub>11</sub> H <sub>17</sub> BrN                                           |
| Brimonidine                    | Antiglaucoma       | 59803-98-4  |      | C <sub>11</sub> H <sub>10</sub> BrN <sub>5</sub>                              |
| Brinazarone                    | Antiarrhythmic     | 89622-90-2  |      | C <sub>25</sub> H <sub>32</sub> N <sub>2</sub> O <sub>2</sub>                 |
| Brindoxime                     | Analgesic          | 55837-17-7  |      | C <sub>18</sub> H <sub>19</sub> Br <sub>2</sub> N <sub>5</sub> O <sub>2</sub> |
| Brinzolamide                   | Antiglaucoma       | 138890-62-7 |      | C <sub>12</sub> H <sub>21</sub> N <sub>3</sub> O <sub>5</sub> S <sub>3</sub>  |
| Brivaracetam                   | Nootropic          | 357336-20-0 | Y    | C <sub>11</sub> H <sub>20</sub> N <sub>2</sub> O <sub>2</sub>                 |

Table S1. Cont.

| Common Name           | Indication       | CAS Number  | Oral | Molecular Formula                                                             |
|-----------------------|------------------|-------------|------|-------------------------------------------------------------------------------|
| Brivudine             | Antiviral        | 69304-47-8  |      | C <sub>11</sub> H <sub>13</sub> BrN <sub>2</sub> O <sub>5</sub>               |
| Brobactam             | Antibiotic       | 26631-90-3  |      | C <sub>8</sub> H <sub>10</sub> BrNO <sub>3</sub> S                            |
| Broclepride           | Gastroprokinetic | 71195-56-7  |      | C <sub>20</sub> H <sub>23</sub> BrClN <sub>3</sub> O <sub>2</sub>             |
| Brocresine            | Antiparkinsonian | 555-65-7    |      | C <sub>7</sub> H <sub>8</sub> BrNO <sub>2</sub>                               |
| Brocrinat             | Diuretic         | 72481-99-3  |      | C <sub>15</sub> H <sub>9</sub> BrFNO <sub>4</sub>                             |
| Brodimoprim           | Antineoplastic   | 56518-41-3  |      | C <sub>13</sub> H <sub>15</sub> BrN <sub>4</sub> O <sub>2</sub>               |
| Brofaromine           | Antidepressant   | 63638-91-5  |      | C <sub>14</sub> H <sub>16</sub> BrNO <sub>2</sub>                             |
| Profezil              | Nootropic        | 17969-45-8  |      | C <sub>12</sub> H <sub>10</sub> BrNO <sub>2</sub> S                           |
| Brofoxine             | Antipsychotic    | 21440-97-1  |      | C <sub>10</sub> H <sub>10</sub> BrNO <sub>2</sub>                             |
| Brolaconazole         | Antifungal       | 118528-04-4 |      | C <sub>17</sub> H <sub>15</sub> BrN <sub>2</sub>                              |
| Brolamfetamine        | Nootropic        | 64638-07-9  |      | C <sub>11</sub> H <sub>16</sub> BrNO <sub>2</sub>                             |
| Bromacrylide          | Antineoplastic   | 4213-51-8   |      | C <sub>7</sub> H <sub>11</sub> BrN <sub>2</sub> O <sub>2</sub>                |
| Bromadoline Maleate   | Analgesic        | 67579-24-2  |      | C <sub>15</sub> H <sub>21</sub> BrN <sub>2</sub> O                            |
| Bromamid              | Unclassified     | 332-69-4    |      | C <sub>11</sub> H <sub>15</sub> BrN <sub>2</sub> O                            |
| Bromazepam            | Anxiolytic       | 1812-30-2   | Y    | C <sub>14</sub> H <sub>10</sub> BrN <sub>3</sub> O                            |
| Bromebric Acid        | Antineoplastic   | 5711-40-0   |      | C <sub>11</sub> H <sub>9</sub> BrO <sub>4</sub>                               |
| Bromerguride          | Antipsychotic    | 83455-48-5  |      | C <sub>20</sub> H <sub>25</sub> BrN <sub>4</sub> O                            |
| Bromfenac             | Antiinflammatory | 91714-94-2  |      | C <sub>15</sub> H <sub>12</sub> BrNO <sub>3</sub>                             |
| Bromhexine            | Expectorant      | 3572-43-8   | Y    | C <sub>14</sub> H <sub>20</sub> Br <sub>2</sub> N <sub>2</sub>                |
| Bromindione           | Anticoagulant    | 1146-98-1   |      | C <sub>15</sub> H <sub>9</sub> BrO <sub>2</sub>                               |
| Bromisovalum          | Sedative         | 496-67-3    |      | C <sub>6</sub> H <sub>11</sub> BrN <sub>2</sub> O <sub>2</sub>                |
| Bromociclen           | Unclassified     | 1715-40-8   |      | C <sub>8</sub> H <sub>5</sub> BrCl <sub>6</sub>                               |
| Bromocriptine         | Pituitary        | 25614-03-3  | Y    | C <sub>32</sub> H <sub>40</sub> BrN <sub>5</sub> O <sub>5</sub>               |
| Bromodiphenhydramine  | Antihistaminic   | 118-23-0    |      | C <sub>17</sub> H <sub>20</sub> BrNO                                          |
| Bromofenofos          | Antineoplastic   | 21466-07-9  |      | C <sub>12</sub> H <sub>7</sub> Br <sub>4</sub> O <sub>5</sub> P               |
| Bromoform             | Sedative         | 75-25-2     |      | CHBr <sub>3</sub>                                                             |
| Bromofos              | Antineoplastic   | 2104-96-3   |      | C <sub>8</sub> H <sub>8</sub> BrCl <sub>2</sub> O <sub>3</sub> PS             |
| Bromopride            | Antiemetic       | 4093-35-0   |      | C <sub>14</sub> H <sub>22</sub> BrN <sub>3</sub> O <sub>2</sub>               |
| Bromoxanide           | Anthelminthic    | 41113-86-4  |      | C <sub>19</sub> H <sub>18</sub> Br <sub>3</sub> N <sub>2</sub> O <sub>4</sub> |
| Bromperidol           | Antipsychotic    | 10457-90-6  |      | C <sub>21</sub> H <sub>23</sub> BrFNO <sub>2</sub>                            |
| Bromperidol Decanoate | Antipsychotic    | 75067-66-2  |      | C <sub>31</sub> H <sub>41</sub> BrFNO <sub>3</sub>                            |
| Brompheniramine       | Antihistaminic   | 86-22-6     | Y    | C <sub>16</sub> H <sub>19</sub> BrN <sub>2</sub>                              |
| Broparestrol          | Estrogen         | 479-68-5    |      | C <sub>22</sub> H <sub>19</sub> Br                                            |
| Properamole           | Antiinflammatory | 33144-79-5  |      | C <sub>15</sub> H <sub>18</sub> Br <sub>4</sub> N <sub>5</sub> O              |
| Bropirimine           | Antineoplastic   | 56741-95-8  |      | C <sub>10</sub> H <sub>8</sub> BrN <sub>3</sub> O                             |
| Brosotamide           | Nootropic        | 40912-73-0  |      | C <sub>8</sub> H <sub>8</sub> BrNO <sub>2</sub>                               |
| Brostallicin          | Antibiotic       | 203258-60-0 |      | C <sub>30</sub> H <sub>35</sub> BrN <sub>12</sub> O <sub>5</sub>              |
| Brosuximide           | Antineoplastic   | 22855-57-8  |      | C <sub>10</sub> H <sub>8</sub> BrNO <sub>2</sub>                              |
| Brotianide            | Antiarrhythmic   | 23233-88-7  |      | C <sub>15</sub> H <sub>10</sub> Br <sub>2</sub> ClNO <sub>2</sub> S           |
| Brotizolam            | Sedative         | 57801-81-7  | Y    | C <sub>15</sub> H <sub>10</sub> BrClN <sub>4</sub> S                          |
| Brovanexine           | Expectorant      | 54340-61-3  |      | C <sub>24</sub> H <sub>28</sub> Br <sub>2</sub> N <sub>2</sub> O <sub>4</sub> |
| Brovincamine          | Vasodilator      | 57475-17-9  | Y    | C <sub>21</sub> H <sub>25</sub> Br <sub>2</sub> N <sub>2</sub> O <sub>3</sub> |
| Broxaldine            | Antibacterial    | 3684-46-6   |      | C <sub>17</sub> H <sub>11</sub> Br <sub>2</sub> NO <sub>2</sub>               |
| Broxaterol            | Bronchodilator   | 76596-57-1  |      | C <sub>9</sub> H <sub>15</sub> BrN <sub>2</sub> O <sub>2</sub>                |
| Broxitalamic Acid     | Unclassified     | 86216-41-3  |      | C <sub>12</sub> H <sub>11</sub> Br <sub>3</sub> N <sub>2</sub> O <sub>5</sub> |
| Broxuridine           | Antineoplastic   | 59-14-3     |      | C <sub>9</sub> H <sub>11</sub> BrN <sub>2</sub> O <sub>5</sub>                |
| Brucine               | Nootropic        | 357-57-3    |      | C <sub>23</sub> H <sub>26</sub> N <sub>2</sub> O <sub>4</sub>                 |
| Bucainide Maleate     | Antiarrhythmic   | 51481-62-0  |      | C <sub>21</sub> H <sub>35</sub> N <sub>3</sub>                                |
| Bucetin               | Analgesic        | 1083-57-4   |      | C <sub>12</sub> H <sub>17</sub> NO <sub>3</sub>                               |
| Buciclovir            | Antiviral        | 86304-28-1  |      | C <sub>9</sub> H <sub>13</sub> N <sub>5</sub> O <sub>3</sub>                  |
| Bucillamine           | Antirheumatic    | 65002-17-7  | Y    | C <sub>7</sub> H <sub>13</sub> NO <sub>3</sub> S <sub>2</sub>                 |
| Bucindolol            | Antihypertensive | 71119-11-4  | Y    | C <sub>22</sub> H <sub>25</sub> N <sub>3</sub> O <sub>2</sub>                 |
| Bucladesine           | Cardiotonic      | 362-74-3    |      | C <sub>18</sub> H <sub>24</sub> N <sub>5</sub> O <sub>8</sub> P               |
| Buclizine             | Antiemetic       | 82-95-1     |      | C <sub>28</sub> H <sub>33</sub> ClN <sub>2</sub>                              |
| Buclosamide           | Antifungal       | 575-74-6    |      | C <sub>11</sub> H <sub>14</sub> ClNO <sub>2</sub>                             |
| Bucloxic Acid         | Antiinflammatory | 32808-51-8  |      | C <sub>16</sub> H <sub>19</sub> ClO <sub>3</sub>                              |
| Bucolome              | Antiinflammatory | 841-73-6    |      | C <sub>14</sub> H <sub>22</sub> N <sub>2</sub> O <sub>3</sub>                 |
| Bucricaine            | Analgesic        | 316-15-4    |      | C <sub>17</sub> H <sub>22</sub> N <sub>2</sub>                                |
| Bucromarone           | Antiarrhythmic   | 78371-66-1  |      | C <sub>29</sub> H <sub>37</sub> NO <sub>4</sub>                               |
| Bucumolol             | Antianginal      | 58409-59-9  |      | C <sub>17</sub> H <sub>23</sub> NO <sub>4</sub>                               |
| Budesonide            | Glucocorticoid   | 51333-22-3  | Y    | C <sub>25</sub> H <sub>34</sub> O <sub>6</sub>                                |
| Budipine              | Antiparkinsonian | 57982-78-2  | Y    | C <sub>21</sub> H <sub>27</sub> N                                             |
| Budralazine           | Antihypertensive | 36798-79-5  |      | C <sub>14</sub> H <sub>16</sub> N <sub>4</sub>                                |

Table S1. Cont.

| Common Name       | Indication                | CAS Number  | Oral | Molecular Formula                                                              |
|-------------------|---------------------------|-------------|------|--------------------------------------------------------------------------------|
| Bufenadrine       | Antihistaminic            | 604-74-0    |      | C <sub>21</sub> H <sub>29</sub> NO                                             |
| Bufeniode         | Antihypertensive          | 22103-14-6  |      | C <sub>19</sub> H <sub>23</sub> I <sub>2</sub> NO <sub>2</sub>                 |
| Bufetolol         | Antiarrhythmic            | 53684-49-4  |      | C <sub>18</sub> H <sub>29</sub> NO <sub>4</sub>                                |
| Bufexamac         | Antiinflammatory          | 2438-72-4   |      | C <sub>12</sub> H <sub>17</sub> NO <sub>3</sub>                                |
| Bufezolac         | Antiinflammatory          | 50270-32-1  |      | C <sub>21</sub> H <sub>22</sub> N <sub>2</sub> O <sub>2</sub>                  |
| Buflomedil        | Vasodilator               | 55837-25-7  | Y    | C <sub>17</sub> H <sub>25</sub> NO <sub>4</sub>                                |
| Bufogenin         | Cardiotonic               | 465-39-4    |      | C <sub>24</sub> H <sub>32</sub> O <sub>4</sub>                                 |
| Buformin          | Antidiabetic              | 692-13-7    |      | C <sub>6</sub> H <sub>15</sub> N <sub>5</sub>                                  |
| Bufrolin          | Antihistaminic            | 54867-56-0  |      | C <sub>18</sub> H <sub>16</sub> N <sub>2</sub> O <sub>6</sub>                  |
| Bufuralol         | Antianginal               | 54340-62-4  |      | C <sub>16</sub> H <sub>23</sub> NO <sub>2</sub>                                |
| Bulaquine         | Antimalarial              | 79781-00-3  | Y    | C <sub>21</sub> H <sub>27</sub> N <sub>3</sub> O <sub>3</sub>                  |
| Bumadizone        | Analgesic                 | 3583-64-0   |      | C <sub>19</sub> H <sub>22</sub> N <sub>2</sub> O <sub>3</sub>                  |
| Bumecaine         | Anesthetic                | 30103-44-7  |      | C <sub>18</sub> H <sub>28</sub> N <sub>2</sub> O                               |
| Bumepidil         | Antihypertensive          | 62052-97-5  |      | C <sub>12</sub> H <sub>17</sub> N <sub>5</sub>                                 |
| Bumetanide        | Diuretic                  | 28395-03-1  | Y    | C <sub>17</sub> H <sub>20</sub> N <sub>2</sub> O <sub>5</sub> S                |
| Bumetrizole       | Dermatologic              | 3896-11-5   |      | C <sub>17</sub> H <sub>18</sub> ClN <sub>3</sub> O                             |
| Bunaftine         | Antiarrhythmic            | 32421-46-8  |      | C <sub>21</sub> H <sub>30</sub> N <sub>2</sub> O                               |
| Bunamidine        | Anthelminthic             | 3748-77-4   |      | C <sub>25</sub> H <sub>38</sub> N <sub>2</sub> O                               |
| Bunamiodyl Sodium | Unclassified              | 1233-53-0   |      | C <sub>15</sub> H <sub>16</sub> I <sub>3</sub> NO <sub>3</sub>                 |
| Bunaprolast       | Bronchodilator            | 99107-52-5  |      | C <sub>17</sub> H <sub>20</sub> O <sub>3</sub>                                 |
| Bunazosin         | Antihypertensive          | 80755-51-7  | Y    | C <sub>19</sub> H <sub>27</sub> N <sub>5</sub> O <sub>3</sub>                  |
| Bunitrolol        | Antianginal               | 34915-68-9  |      | C <sub>14</sub> H <sub>20</sub> N <sub>2</sub> O <sub>2</sub>                  |
| Bunolol           | Antihypertensive          | 27591-01-1  |      | C <sub>17</sub> H <sub>25</sub> NO <sub>3</sub>                                |
| Buparvaquone      | Antineoplastic            | 88426-33-9  |      | C <sub>21</sub> H <sub>26</sub> O <sub>3</sub>                                 |
| Bupicomide        | Antihypertensive          | 22632-06-0  |      | C <sub>10</sub> H <sub>14</sub> N <sub>2</sub> O                               |
| Bupivacaine       | Anesthetic                | 38396-39-3  |      | C <sub>18</sub> H <sub>28</sub> N <sub>2</sub> O                               |
| Bupranolol        | Antianginal               | 14556-46-8  |      | C <sub>14</sub> H <sub>22</sub> ClNO <sub>2</sub>                              |
| Buprenorphine     | Analgesic                 | 52485-79-7  |      | C <sub>29</sub> H <sub>41</sub> NO <sub>4</sub>                                |
| Bupropion         | Antidepressant            | 34911-55-2  | Y    | C <sub>13</sub> H <sub>18</sub> ClNO                                           |
| Buquineran        | Cardiotonic               | 59184-78-0  |      | C <sub>20</sub> H <sub>29</sub> N <sub>5</sub> O <sub>3</sub>                  |
| Buquinolate       | Antibacterial             | 5486/3/3    |      | C <sub>20</sub> H <sub>27</sub> NO <sub>5</sub>                                |
| Buquiterine       | Antispasmodic             | 76536-74-8  |      | C <sub>18</sub> H <sub>23</sub> N <sub>3</sub> O <sub>3</sub>                  |
| Buramate          | Anticonvulsant            | 4663-83-6   |      | C <sub>10</sub> H <sub>13</sub> NO <sub>3</sub>                                |
| Burodiline        | Vasodilator               | 36121-13-8  |      | C <sub>19</sub> H <sub>29</sub> NO <sub>5</sub>                                |
| Buspirone         | Anxiolytic                | 36505-84-7  | Y    | C <sub>21</sub> H <sub>31</sub> N <sub>5</sub> O <sub>2</sub>                  |
| Busulfan          | Antineoplastic            | 55-98-1     | Y    | C <sub>6</sub> H <sub>14</sub> O <sub>6</sub> S <sub>2</sub>                   |
| Butabarbital      | Sedative                  | 125-40-6    | Y    | C <sub>10</sub> H <sub>16</sub> N <sub>2</sub> O <sub>3</sub>                  |
| Butacaine         | Anesthetic                | 149-16-6    |      | C <sub>18</sub> H <sub>30</sub> N <sub>2</sub> O <sub>2</sub>                  |
| Butacetin         | Analgesic                 | 2109-73-1   |      | C <sub>6</sub> H <sub>12</sub> O                                               |
| Butaclamol        | Antipsychotic             | 51152-91-1  |      | C <sub>25</sub> H <sub>31</sub> NO                                             |
| Butadiazamide     | Analgesic                 | 7007-88-7   |      | C <sub>12</sub> H <sub>14</sub> ClN <sub>3</sub> O <sub>2</sub> S <sub>2</sub> |
| Butafosfan        | Antineoplastic            | 17316-67-5  |      | C <sub>7</sub> H <sub>18</sub> NO <sub>2</sub> P                               |
| Butalamine        | Vasodilator               | 22131-35-7  |      | C <sub>18</sub> H <sub>28</sub> N <sub>4</sub> O                               |
| Butalbital        | Sedative                  | 77-26-9     |      | C <sub>11</sub> H <sub>16</sub> N <sub>2</sub> O <sub>3</sub>                  |
| Butallylonal      | Sedative                  | 1142-70-7   |      | C <sub>11</sub> H <sub>15</sub> BrN <sub>2</sub> O <sub>3</sub>                |
| Butamben          | Anesthetic                | 94-25-7     |      | C <sub>11</sub> H <sub>15</sub> NO <sub>2</sub>                                |
| Butamin           | Unclassified              | 891-33-8    |      | C <sub>14</sub> H <sub>22</sub> N <sub>2</sub> O <sub>2</sub>                  |
| Butamirate        | Anesthetic                | 18109-80-3  | Y    | C <sub>18</sub> H <sub>29</sub> NO <sub>3</sub>                                |
| Butamisole        | Anthelminthic             | 54400-59-8  |      | C <sub>15</sub> H <sub>19</sub> N <sub>3</sub> OS                              |
| Butamoxane        | Sedative                  | 4442-60-8   |      | C <sub>13</sub> H <sub>19</sub> NO <sub>2</sub>                                |
| Butanilicaine     | Anesthetic                | 3785-21-5   |      | C <sub>13</sub> H <sub>19</sub> ClN <sub>2</sub> O                             |
| Butanixin         | Antiinflammatory          | 55285-35-3  |      | C <sub>16</sub> H <sub>18</sub> N <sub>2</sub> O <sub>2</sub>                  |
| Butanserlin       | Antihypertensive          | 87051-46-5  |      | C <sub>24</sub> H <sub>26</sub> FN <sub>3</sub> O <sub>3</sub>                 |
| Butantrone        | Dermatologic              | 75464-11-8  |      | C <sub>18</sub> H <sub>16</sub> O <sub>4</sub>                                 |
| Butaperazine      | Antipsychotic             | 653-03-2    |      | C <sub>24</sub> H <sub>31</sub> N <sub>3</sub> OS                              |
| Butaprost         | Bronchodilator            | 69648-38-0  |      | C <sub>24</sub> H <sub>40</sub> O <sub>5</sub>                                 |
| Butaverine        | Antispasmodic             | 55837-14-4  |      | C <sub>18</sub> H <sub>27</sub> NO <sub>2</sub>                                |
| Butedronic Acid   | Bone Resorption Inhibitor | 51395-42-7  |      | C <sub>5</sub> H <sub>10</sub> O <sub>10</sub> P <sub>2</sub>                  |
| Butenafine        | Antifungal                | 101828-21-1 |      | C <sub>23</sub> H <sub>27</sub> N                                              |
| Buterizine        | Vasodilator               | 68741-18-4  |      | C <sub>31</sub> H <sub>38</sub> N <sub>4</sub>                                 |
| Butetamate        | Antitussive               | 14007-64-8  |      | C <sub>16</sub> H <sub>25</sub> NO <sub>2</sub>                                |
| Butethal          | Sedative                  | 77-28-1     |      | C <sub>10</sub> H <sub>16</sub> N <sub>2</sub> O <sub>3</sub>                  |
| Butethamine       | Anesthetic                | 2090-89-3   |      | C <sub>13</sub> H <sub>20</sub> N <sub>2</sub> O <sub>2</sub>                  |

Table S1. Cont.

| Common Name                | Indication                | CAS Number  | Oral | Molecular Formula                                                                                                           |
|----------------------------|---------------------------|-------------|------|-----------------------------------------------------------------------------------------------------------------------------|
| Buthalital Sodium          | Anesthetic                | 468-65-5    |      | C <sub>11</sub> H <sub>16</sub> N <sub>2</sub> O <sub>2</sub> S                                                             |
| Buthiazide                 | Diuretic                  | 2043-38-1   |      | C <sub>11</sub> H <sub>16</sub> ClN <sub>3</sub> O <sub>4</sub> S <sub>2</sub>                                              |
| Butibufen                  | Antiinflammatory          | 55837-18-8  |      | C <sub>14</sub> H <sub>20</sub> O <sub>2</sub>                                                                              |
| Butidrine                  | Antiarrhythmic            | 7433-10-5   |      | C <sub>16</sub> H <sub>25</sub> NO                                                                                          |
| Butikacin                  | Antibacterial             | 59733-86-7  |      | C <sub>22</sub> H <sub>45</sub> N <sub>5</sub> O <sub>12</sub>                                                              |
| Butinazocine               | Analgesic                 | 93821-75-1  |      | C <sub>18</sub> H <sub>23</sub> NO <sub>2</sub>                                                                             |
| Butixirate                 | Analgesic                 | 5769-10-8   |      | C <sub>12</sub> H <sub>17</sub> N                                                                                           |
| Butixocort                 | Bronchodilator            | 120815-74-9 |      | C <sub>25</sub> H <sub>36</sub> O <sub>5</sub> S                                                                            |
| Butobendine                | Antiarrhythmic            | 55769-65-8  |      | C <sub>32</sub> H <sub>48</sub> N <sub>2</sub> O <sub>10</sub>                                                              |
| Butoconazole               | Antifungal                | 64872-76-0  |      | C <sub>19</sub> H <sub>17</sub> Cl <sub>3</sub> N <sub>2</sub> S                                                            |
| Butocrolol                 | Unclassified              | 55165-22-5  |      | C <sub>19</sub> H <sub>23</sub> NO <sub>6</sub>                                                                             |
| Butoctamide                | Sedative                  | 32838-26-9  |      | C <sub>12</sub> H <sub>25</sub> NO <sub>2</sub>                                                                             |
| Butofilolol                | Antihypertensive          | 58930-32-8  |      | C <sub>17</sub> H <sub>26</sub> FNO <sub>3</sub>                                                                            |
| Butonate                   | Anthelminthic             | 126-22-7    |      | C <sub>8</sub> H <sub>14</sub> Cl <sub>3</sub> O <sub>5</sub> P                                                             |
| Butopamine                 | Cardiotonic               | 66734-12-1  |      | C <sub>18</sub> H <sub>23</sub> NO <sub>3</sub>                                                                             |
| Butopiprine                | Unclassified              | 55837-15-5  |      | C <sub>19</sub> H <sub>29</sub> NO <sub>3</sub>                                                                             |
| Butoprozine                | Antiarrhythmic            | 62228-20-0  |      | C <sub>28</sub> H <sub>38</sub> N <sub>2</sub> O <sub>2</sub>                                                               |
| Butorphanol                | Analgesic                 | 42408-82-2  |      | C <sub>21</sub> H <sub>29</sub> NO <sub>2</sub>                                                                             |
| Butoxamine                 | Antidiabetic              | 1937-89-9   |      | C <sub>15</sub> H <sub>25</sub> NO <sub>3</sub>                                                                             |
| Butoxylate                 | Antihypertensive          | 15302-05-3  |      | C <sub>32</sub> H <sub>36</sub> N <sub>2</sub> O <sub>2</sub>                                                               |
| Butriptyline               | Antidepressant            | 35941-65-2  | Y    | C <sub>21</sub> H <sub>27</sub> N                                                                                           |
| Butropium Bromide          | Antispasmodic             | 29025-14-7  |      | C <sub>28</sub> H <sub>38</sub> NO <sub>4</sub> .Br                                                                         |
| Butyl Chloride             | Anthelminthic             | 109-69-3    |      | C <sub>4</sub> H <sub>9</sub> Cl                                                                                            |
| Butylphenamide             | Antiglaucoma              | 131-90-8    |      | C <sub>17</sub> H <sub>19</sub> NO <sub>2</sub>                                                                             |
| Butylscopolamine Bromide   | Antispasmodic             | 149-64-4    | Y    | C <sub>21</sub> H <sub>30</sub> BrNO <sub>4</sub>                                                                           |
| Butynamine                 | Antispasmodic             | 3735-65-7   |      | C <sub>10</sub> H <sub>19</sub> N                                                                                           |
| Buzepide Metiodide         | Antispasmodic             | 15351-05-0  |      | C <sub>23</sub> H <sub>31</sub> N <sub>2</sub> O.I                                                                          |
| Cabastine                  | Antineoplastic            | 79449-98-2  |      | C <sub>26</sub> H <sub>29</sub> FN <sub>2</sub> O <sub>2</sub>                                                              |
| Cabergoline                | Antiparkinsonian          | 81409-90-7  | Y    | C <sub>26</sub> H <sub>37</sub> N <sub>5</sub> O <sub>2</sub>                                                               |
| Cadralazine                | Vasodilator               | 64241-34-5  | Y    | C <sub>12</sub> H <sub>21</sub> N <sub>5</sub> O <sub>3</sub>                                                               |
| Cadroxifloxacin            | Antibiotic                | 153808-85-6 |      | C <sub>19</sub> H <sub>20</sub> F <sub>3</sub> N <sub>3</sub> O <sub>4</sub>                                                |
| Cafaminol                  | Decongestant              | 30924-31-3  |      | C <sub>11</sub> H <sub>17</sub> N <sub>5</sub> O <sub>3</sub>                                                               |
| Cafedrine                  | Nootropic                 | 58166-83-9  |      | C <sub>18</sub> H <sub>23</sub> N <sub>5</sub> O <sub>3</sub>                                                               |
| Caffeine                   | Nootropic                 | 58-08-2     | Y    | C <sub>8</sub> H <sub>10</sub> N <sub>4</sub> O <sub>2</sub>                                                                |
| Calcifediol                | Bone Resorption Inhibitor | 19356-17-3  | Y    | C <sub>27</sub> H <sub>44</sub> O <sub>2</sub>                                                                              |
| Calcipotriene              | Dermatologic              | 112965-21-6 |      | C <sub>27</sub> H <sub>40</sub> O <sub>3</sub>                                                                              |
| Calcium Carbimide          | Alcohol Deterrant         | 420-04-2    |      | CH <sub>2</sub> N <sub>2</sub>                                                                                              |
| Calcium Dobesilate         | Capillary Protectant      | 88-46-0     |      | C <sub>6</sub> H <sub>6</sub> O <sub>5</sub> S                                                                              |
| Calcobutrol                | Unclassified              | 138168-36-2 |      | C <sub>18</sub> H <sub>34</sub> N <sub>4</sub> O <sub>9</sub>                                                               |
| Caldaret                   | Cardiotonic               | 133804-44-1 |      | C <sub>11</sub> H <sub>16</sub> N <sub>2</sub> O <sub>3</sub> S                                                             |
| Calusterone                | Antineoplastic            | 17021-26-0  |      | C <sub>21</sub> H <sub>32</sub> O <sub>2</sub>                                                                              |
| Camazepam                  | Anxiolytic                | 36104-80-0  |      | C <sub>19</sub> H <sub>18</sub> ClN <sub>3</sub> O <sub>3</sub>                                                             |
| Cambendazole               | Anthelminthic             | 26097-80-3  |      | C <sub>14</sub> H <sub>14</sub> N <sub>4</sub> O <sub>2</sub> S                                                             |
| Camiglibose                | Antidiabetic              | 127214-23-7 |      | C <sub>13</sub> H <sub>25</sub> NO <sub>9</sub>                                                                             |
| Camiverine                 | Antispasmodic             | 54063-28-4  |      | C <sub>19</sub> H <sub>30</sub> N <sub>2</sub> O <sub>2</sub>                                                               |
| Camonagrel                 | Anticoagulant             | 105920-77-2 |      | C <sub>15</sub> H <sub>16</sub> N <sub>2</sub> O <sub>3</sub>                                                               |
| Camostat                   | Antiviral                 | 59721-28-7  | Y    | C <sub>20</sub> H <sub>22</sub> N <sub>4</sub> O <sub>5</sub>                                                               |
| Camphor                    | Analgesic                 | 76-22-2     |      | C <sub>10</sub> H <sub>16</sub> O                                                                                           |
| Camphoric Acid             | Analgesic                 | 5394-83-2   |      | C <sub>10</sub> H <sub>16</sub> O <sub>4</sub>                                                                              |
| Camphotamide               | Nootropic                 | 4876-45-3   |      | C <sub>21</sub> H <sub>32</sub> N <sub>2</sub> O <sub>5</sub> S                                                             |
| Camptothecin               | Antineoplastic            | 7689-03-4   |      | C <sub>20</sub> H <sub>16</sub> N <sub>2</sub> O <sub>4</sub>                                                               |
| Camyllofin                 | Antispasmodic             | 54-30-8     |      | C <sub>19</sub> H <sub>32</sub> N <sub>2</sub> O <sub>2</sub>                                                               |
| Canbisol                   | Anxiolytic                | 56689-43-1  |      | C <sub>24</sub> H <sub>38</sub> O <sub>3</sub>                                                                              |
| Candesartan                | Antihypertensive          | 139481-59-7 | Y    | C <sub>24</sub> H <sub>20</sub> N <sub>6</sub> O <sub>3</sub>                                                               |
| Candesartan Cilexetil      | Antihypertensive          | 145040-37-5 | Y    | C <sub>33</sub> H <sub>34</sub> N <sub>6</sub> O <sub>6</sub>                                                               |
| Candocurionium Iodide      | Muscle Relaxant           | 54278-85-2  |      | C <sub>26</sub> H <sub>46</sub> I <sub>2</sub> N <sub>2</sub>                                                               |
| Candoxatril                | Cardiotonic               | 123122-55-4 |      | C <sub>29</sub> H <sub>41</sub> NO <sub>7</sub>                                                                             |
| Candoxatrilat              | Cardiotonic               | 123122-54-3 |      | C <sub>20</sub> H <sub>33</sub> NO <sub>7</sub>                                                                             |
| Canertinib Dihydrochloride | Antineoplastic            | 267243-28-7 |      | C <sub>24</sub> H <sub>25</sub> ClFN <sub>5</sub> O <sub>3</sub>                                                            |
| Canfosamide                | Antineoplastic            | 158382-37-7 |      | C <sub>26</sub> H <sub>40</sub> Cl <sub>4</sub> N <sub>5</sub> O <sub>10</sub> PS                                           |
| Cangrelor                  | Anticoagulant             | 163706-06-7 |      | C <sub>17</sub> H <sub>25</sub> Cl <sub>2</sub> F <sub>3</sub> N <sub>5</sub> O <sub>12</sub> P <sub>3</sub> S <sub>2</sub> |
| Cannabinol                 | Antiemetic                | 521-35-7    |      | C <sub>21</sub> H <sub>26</sub> O <sub>2</sub>                                                                              |
| Canrenoate                 | Diuretic                  | 4138-96-9   |      | C <sub>22</sub> H <sub>30</sub> O <sub>4</sub>                                                                              |



Table S1. Cont.

| Common Name                  | Indication       | CAS Number  | Oral | Molecular Formula                                                               |
|------------------------------|------------------|-------------|------|---------------------------------------------------------------------------------|
| Canrenone                    | Diuretic         | 976-71-6    |      | C <sub>22</sub> H <sub>28</sub> O <sub>3</sub>                                  |
| Cantharides                  | Dermatologic     | 56-25-7     |      | C <sub>10</sub> H <sub>12</sub> O <sub>4</sub>                                  |
| Capecitabine                 | Antineoplastic   | 154361-50-9 | Y    | C <sub>15</sub> H <sub>22</sub> FN <sub>3</sub> O <sub>6</sub>                  |
| Capobenic Acid               | Antiarrhythmic   | 21434-91-3  |      | C <sub>16</sub> H <sub>23</sub> NO <sub>6</sub>                                 |
| Capravirine                  | Antiviral        | 178979-85-6 |      | C <sub>20</sub> H <sub>20</sub> Cl <sub>2</sub> N <sub>4</sub> O <sub>2</sub> S |
| Capromorelin Tartrate        | Cardiotonic      | 193273-66-4 |      | C <sub>28</sub> H <sub>35</sub> N <sub>5</sub> O <sub>4</sub>                   |
| Caproxamine                  | Antidepressant   | 53078-44-7  |      | C <sub>15</sub> H <sub>25</sub> N <sub>3</sub> O                                |
| Caprylate                    | Antifungal       | 74-81-7     |      | C <sub>8</sub> H <sub>15</sub> O <sub>2</sub>                                   |
| Capsaicin                    | Analgesic        | 404-86-4    |      | C <sub>18</sub> H <sub>27</sub> NO <sub>3</sub>                                 |
| Captamine                    | Dermatologic     | 108-02-1    |      | C <sub>4</sub> H <sub>11</sub> NS                                               |
| Captodiamine                 | Anxiolytic       | 486-17-9    |      | C <sub>21</sub> H <sub>29</sub> NS <sub>2</sub>                                 |
| Captopril                    | Antihypertensive | 62571-86-2  | Y    | C <sub>9</sub> H <sub>15</sub> NO <sub>3</sub> S                                |
| Capuride                     | Sedative         | 5579-13-5   |      | C <sub>9</sub> H <sub>18</sub> N <sub>2</sub> O <sub>2</sub>                    |
| Carabersat                   | Antimigraine     | 184653-84-7 |      | C <sub>20</sub> H <sub>20</sub> FNO <sub>4</sub>                                |
| Caracemide                   | Antineoplastic   | 81424-67-1  |      | C <sub>6</sub> H <sub>11</sub> N <sub>3</sub> O <sub>4</sub>                    |
| Carafiban                    | Antithrombotic   | 177563-40-5 |      | C <sub>24</sub> H <sub>27</sub> N <sub>5</sub> O <sub>5</sub>                   |
| Caramiphen                   | Antitussive      | 77-22-5     |      | C <sub>18</sub> H <sub>27</sub> NO <sub>2</sub>                                 |
| Carazolol                    | Antihypertensive | 57775-29-8  |      | C <sub>18</sub> H <sub>22</sub> N <sub>2</sub> O <sub>2</sub>                   |
| Carbachol                    | Cholinergic      | 51-83-2     |      | C <sub>6</sub> H <sub>15</sub> N <sub>2</sub> O <sub>2</sub> .Cl                |
| Carbadox                     | Antibacterial    | 6804-07-5   |      | C <sub>11</sub> H <sub>10</sub> N <sub>4</sub> O <sub>4</sub>                   |
| Carbamazepine                | Anticonvulsant   | 298-46-4    | Y    | C <sub>15</sub> H <sub>12</sub> N <sub>2</sub> O                                |
| Carbanteil Lauryl Sulfate    | Anthelmintic     | 22790-84-7  |      | C <sub>12</sub> H <sub>16</sub> ClN <sub>3</sub> O                              |
| Carbanteil Lauryl Sulfate    | Anthelmintic     | 151-41-7    |      | C <sub>12</sub> H <sub>26</sub> O <sub>4</sub> S                                |
| Carbaril                     | Ectoparasiticide | 63-25-2     |      | C <sub>12</sub> H <sub>11</sub> NO <sub>2</sub>                                 |
| Carbarosone                  | Antiamebic       | 121-59-5    |      | C <sub>7</sub> H <sub>9</sub> AsN <sub>2</sub> O <sub>4</sub>                   |
| Carbazeran                   | Cardiotonic      | 70724-25-3  |      | C <sub>18</sub> H <sub>24</sub> N <sub>4</sub> O <sub>4</sub>                   |
| Carbazochrome                | Hemostatic       | 69-81-8     | Y    | C <sub>10</sub> H <sub>12</sub> N <sub>4</sub> O <sub>3</sub>                   |
| Carbazocine                  | Analgesic        | 15686-38-1  |      | C <sub>22</sub> H <sub>28</sub> N <sub>2</sub>                                  |
| Carbenicillin                | Antibiotic       | 4697-36-3   |      | C <sub>17</sub> H <sub>18</sub> N <sub>2</sub> O <sub>6</sub> S                 |
| Carbenicillin Indanyl Sodium | Antibiotic       | 35531-88-5  |      | C <sub>26</sub> H <sub>26</sub> N <sub>2</sub> O <sub>6</sub> S                 |
| Carbenicillin Phenyl Sodium  | Antibiotic       | 27025-49-6  |      | C <sub>23</sub> H <sub>22</sub> N <sub>2</sub> O <sub>6</sub> S                 |
| Carbenoxolone                | Antiulcerative   | 5697-56-3   | Y    | C <sub>34</sub> H <sub>50</sub> O <sub>7</sub>                                  |
| Carbenzide                   | Antipsychotic    | 3240-20-8   |      | C <sub>11</sub> H <sub>16</sub> N <sub>2</sub> O <sub>2</sub>                   |
| Carbetapentane Citrate       | Antitussive      | 77-23-6     |      | C <sub>20</sub> H <sub>31</sub> NO <sub>3</sub>                                 |
| Carbethyl Salicylate         | Unclassified     | 118-27-4    |      | C <sub>19</sub> H <sub>18</sub> O <sub>7</sub>                                  |
| Carbetocin                   | Oxytocic         | 37025-55-1  |      | C <sub>45</sub> H <sub>69</sub> N <sub>11</sub> O <sub>12</sub> S               |
| Carbidopa                    | Antiparkinsonian | 28860-95-9  | Y    | C <sub>10</sub> H <sub>14</sub> N <sub>2</sub> O <sub>4</sub>                   |
| Carbimazole                  | Thyroid          | 22232-54-8  | Y    | C <sub>7</sub> H <sub>10</sub> N <sub>2</sub> O <sub>2</sub> S                  |
| Carbinoxamine                | Antihistaminic   | 486-16-8    | Y    | C <sub>16</sub> H <sub>19</sub> ClN <sub>2</sub> O                              |
| Carbiphen                    | Analgesic        | 15687-16-8  |      | C <sub>28</sub> H <sub>34</sub> N <sub>2</sub> O <sub>2</sub>                   |
| Carbocloral                  | Sedative         | 541-79-7    |      | C <sub>5</sub> H <sub>8</sub> Cl <sub>3</sub> NO <sub>3</sub>                   |
| Carbocysteine                | Mucolytic        | 638-23-3    | Y    | C <sub>5</sub> H <sub>9</sub> NO <sub>4</sub> S                                 |
| Carbofenotion                | Dermatologic     | 786-19-6    |      | C <sub>11</sub> H <sub>16</sub> ClO <sub>2</sub> PS <sub>3</sub>                |
| Carbol Fuchsin               | Antifungal       | 682730-74-1 |      | C <sub>21</sub> H <sub>21</sub> N <sub>3</sub>                                  |
| Carbomycin                   | Antibiotic       | 4564-87-8   |      | C <sub>42</sub> H <sub>67</sub> NO <sub>16</sub>                                |
| Carbon Tetrachloride         | Anthelmintic     | 56-23-5     |      | CCl <sub>4</sub>                                                                |
| Carboprost                   | Oxytocic         | 35700-23-3  |      | C <sub>21</sub> H <sub>36</sub> O <sub>5</sub>                                  |
| Carboprost Methyl            | Oxytocic         | 35700-21-1  |      | C <sub>22</sub> H <sub>38</sub> O <sub>5</sub>                                  |
| Carboquone                   | Antineoplastic   | 24279-91-2  |      | C <sub>15</sub> H <sub>19</sub> N <sub>3</sub> O <sub>5</sub>                   |
| Carbromal                    | Sedative         | 77-65-6     |      | C <sub>7</sub> H <sub>13</sub> BrN <sub>2</sub> O <sub>2</sub>                  |
| Carbubarb                    | Sedative         | 960-05-4    |      | C <sub>11</sub> H <sub>17</sub> N <sub>3</sub> O <sub>5</sub>                   |
| Carburazepam                 | Anxiolytic       | 59009-93-7  |      | C <sub>17</sub> H <sub>16</sub> ClN <sub>3</sub> O <sub>2</sub>                 |
| Carbutamide                  | Antidiabetic     | 339-43-5    |      | C <sub>11</sub> H <sub>17</sub> N <sub>3</sub> O <sub>3</sub> S                 |
| Carbuterol                   | Bronchodilator   | 34866-47-2  |      | C <sub>13</sub> H <sub>21</sub> N <sub>3</sub> O <sub>3</sub>                   |
| Carcainium Chloride          | Anesthetic       | 1042-42-8   |      | C <sub>18</sub> H <sub>22</sub> ClN <sub>3</sub> O <sub>2</sub>                 |
| Carebastine                  | Antihistaminic   | 90729-42-3  |      | C <sub>32</sub> H <sub>37</sub> NO <sub>4</sub>                                 |
| Carfentanil Citrate          | Analgesic        | 59708-52-0  |      | C <sub>24</sub> H <sub>30</sub> N <sub>2</sub> O <sub>3</sub>                   |
| Carfimate                    | Sedative         | 3567-38-2   |      | C <sub>10</sub> H <sub>9</sub> NO <sub>2</sub>                                  |
| Cargutocin                   | Oxytocic         | 33605-67-3  |      | C <sub>42</sub> H <sub>65</sub> N <sub>11</sub> O <sub>12</sub>                 |
| Caricotamide                 | Antithrombotic   | 64881-21-6  |      | C <sub>8</sub> H <sub>11</sub> N <sub>3</sub> O <sub>2</sub>                    |
| Cariporide                   | Cardiotonic      | 159138-80-4 |      | C <sub>12</sub> H <sub>17</sub> N <sub>3</sub> O <sub>3</sub> S                 |
| Carisoprodol                 | Muscle Relaxant  | 78-44-4     | Y    | C <sub>12</sub> H <sub>24</sub> N <sub>2</sub> O <sub>4</sub>                   |
| Carmantidine                 | Antiparkinsonian | 38081-67-3  |      | C <sub>14</sub> H <sub>21</sub> NO <sub>2</sub>                                 |

Table S1. Cont.

| Common Name         | Indication         | CAS Number  | Oral | Molecular Formula                                                                            |
|---------------------|--------------------|-------------|------|----------------------------------------------------------------------------------------------|
| Carmetizide         | Antidiabetic       | 42583-55-1  |      | C <sub>10</sub> H <sub>12</sub> ClN <sub>3</sub> O <sub>6</sub> S <sub>2</sub>               |
| Carmofur            | Antineoplastic     | 61422-45-5  |      | C <sub>11</sub> H <sub>16</sub> FN <sub>3</sub> O <sub>3</sub>                               |
| Carmoterol          | Bronchodilator     | 147568-66-9 |      | C <sub>21</sub> H <sub>24</sub> N <sub>2</sub> O <sub>4</sub>                                |
| Carmoxirole         | Antihypertensive   | 98323-83-2  |      | C <sub>24</sub> H <sub>26</sub> N <sub>2</sub> O <sub>2</sub>                                |
| Carmustine          | Antineoplastic     | 154-93-8    |      | C <sub>5</sub> H <sub>9</sub> Cl <sub>2</sub> N <sub>3</sub> O <sub>2</sub>                  |
| Carnidazole         | Antiprotozoal      | 42116-76-7  |      | C <sub>8</sub> H <sub>12</sub> N <sub>4</sub> O <sub>3</sub> S                               |
| Carnitine           | Antihyperlipidemic | 541-15-1    |      | C <sub>7</sub> H <sub>15</sub> NO <sub>3</sub>                                               |
| Carocainide         | Antiarrhythmic     | 66203-00-7  |      | C <sub>18</sub> H <sub>25</sub> N <sub>3</sub> O <sub>5</sub>                                |
| Caroverine          | Antispasmodic      | 23465-76-1  |      | C <sub>22</sub> H <sub>27</sub> N <sub>3</sub> O <sub>2</sub>                                |
| Caroxazone          | Antidepressant     | 18464-39-6  |      | C <sub>10</sub> H <sub>10</sub> N <sub>2</sub> O <sub>3</sub>                                |
| Carperidine         | Analgesic          | 7008-32-4   |      | C <sub>17</sub> H <sub>24</sub> N <sub>2</sub> O <sub>3</sub>                                |
| Carperone           | Antipsychotic      | 20977-50-8  |      | C <sub>19</sub> H <sub>27</sub> FN <sub>2</sub> O <sub>3</sub>                               |
| Carphenazine        | Antipsychotic      | 2622-30-2   |      | C <sub>24</sub> H <sub>31</sub> N <sub>3</sub> O <sub>2</sub> S                              |
| Carpindolol         | Antihypertensive   | 39731-05-0  |      | C <sub>19</sub> H <sub>28</sub> N <sub>2</sub> O <sub>4</sub>                                |
| Carpipramine        | Antipsychotic      | 5942-95-0   | Y    | C <sub>28</sub> H <sub>38</sub> N <sub>4</sub> O                                             |
| Carprazidil         | Antihypertensive   | 68020-77-9  |      | C <sub>12</sub> H <sub>13</sub> N <sub>5</sub> O <sub>4</sub>                                |
| Carprofen           | Antiinflammatory   | 53716-49-7  | Y    | C <sub>15</sub> H <sub>12</sub> ClNO <sub>2</sub>                                            |
| Carpronium Chloride | Cholinergic        | 13254-33-6  |      | C <sub>8</sub> H <sub>18</sub> ClNO <sub>2</sub>                                             |
| Carsalam            | Analgesic          | 2037-95-8   |      | C <sub>8</sub> H <sub>5</sub> NO <sub>3</sub>                                                |
| Carsatrin Succinate | Cardiotonic        | 125345-93-9 |      | C <sub>25</sub> H <sub>26</sub> F <sub>2</sub> N <sub>6</sub> OS                             |
| Cartasteine         | Mucolytic          | 149079-51-6 |      | C <sub>9</sub> H <sub>14</sub> N <sub>2</sub> O <sub>4</sub> S <sub>2</sub>                  |
| Cartazolate         | Antidepressant     | 34966-41-1  |      | C <sub>15</sub> H <sub>22</sub> N <sub>4</sub> O <sub>2</sub>                                |
| Carteolol           | Antihypertensive   | 51781-06-7  |      | C <sub>16</sub> H <sub>24</sub> N <sub>2</sub> O <sub>3</sub>                                |
| Carubicin           | Antineoplastic     | 50935-04-1  |      | C <sub>26</sub> H <sub>27</sub> NO <sub>10</sub>                                             |
| Carumonam Sodium    | Antibacterial      | 87638-04-8  |      | C <sub>12</sub> H <sub>14</sub> N <sub>6</sub> O <sub>10</sub> S <sub>2</sub>                |
| Carvacrol           | Anthelmintic       | 499-75-2    |      | C <sub>10</sub> H <sub>14</sub> O                                                            |
| Carvedilol          | Antihypertensive   | 72956-09-3  | Y    | C <sub>24</sub> H <sub>26</sub> N <sub>2</sub> O <sub>4</sub>                                |
| Carvotroline        | Antipsychotic      | 107266-08-0 |      | C <sub>18</sub> H <sub>18</sub> FN <sub>3</sub>                                              |
| Carzelesin          | Antineoplastic     | 119813-10-4 |      | C <sub>41</sub> H <sub>37</sub> ClN <sub>6</sub> O <sub>5</sub>                              |
| Carzenide           | Unclassified       | 138-41-0    |      | C <sub>7</sub> H <sub>7</sub> NO <sub>4</sub> S                                              |
| Casokefamide        | Ant ulcerative     | 98815-38-4  |      | C <sub>33</sub> H <sub>40</sub> N <sub>6</sub> O <sub>7</sub>                                |
| Cathine             | Anorexic           | 492-39-7    |      | C <sub>9</sub> H <sub>13</sub> NO                                                            |
| Cathinone           | Nootropic          | 71031-15-7  |      | C <sub>9</sub> H <sub>11</sub> NO                                                            |
| Cebaracetam         | Nootropic          | 113957-09-8 |      | C <sub>16</sub> H <sub>18</sub> ClN <sub>3</sub> O <sub>3</sub>                              |
| Cedefingol          | Antineoplastic     | 35301-24-7  |      | C <sub>20</sub> H <sub>41</sub> NO <sub>3</sub>                                              |
| Cefaclor            | Antibiotic         | 53994-73-3  | Y    | C <sub>15</sub> H <sub>14</sub> ClN <sub>3</sub> O <sub>4</sub> S                            |
| Cefadroxil          | Antibiotic         | 50370-12-2  | Y    | C <sub>16</sub> H <sub>17</sub> N <sub>3</sub> O <sub>5</sub> S                              |
| Cefalonium          | Antibiotic         | 5575-21-3   |      | C <sub>20</sub> H <sub>18</sub> N <sub>4</sub> O <sub>5</sub> S <sub>2</sub>                 |
| Cefaloram           | Antibiotic         | 859-07-4    |      | C <sub>18</sub> H <sub>18</sub> N <sub>2</sub> O <sub>6</sub> S                              |
| Cefamandole         | Antibiotic         | 34444-01-4  |      | C <sub>18</sub> H <sub>18</sub> N <sub>6</sub> O <sub>5</sub> S <sub>2</sub>                 |
| Cefamandole Nafate  | Antibiotic         | 57268-80-1  |      | C <sub>19</sub> H <sub>18</sub> N <sub>6</sub> O <sub>6</sub> S <sub>2</sub>                 |
| Cefaparole          | Antibiotic         | 51627-20-4  |      | C <sub>19</sub> H <sub>19</sub> N <sub>5</sub> O <sub>5</sub> S <sub>3</sub>                 |
| Cefatrizine         | Antibiotic         | 51627-14-6  |      | C <sub>18</sub> H <sub>18</sub> N <sub>6</sub> O <sub>5</sub> S <sub>2</sub>                 |
| Cefazafur           | Antibiotic         | 58665-96-6  |      | C <sub>13</sub> H <sub>13</sub> F <sub>3</sub> N <sub>6</sub> O <sub>4</sub> S <sub>3</sub>  |
| Cefazedone          | Antibiotic         | 56187-47-4  |      | C <sub>18</sub> H <sub>15</sub> Cl <sub>2</sub> N <sub>5</sub> O <sub>5</sub> S <sub>3</sub> |
| Cefazolin           | Antibiotic         | 25953-19-9  |      | C <sub>14</sub> H <sub>14</sub> N <sub>8</sub> O <sub>4</sub> S <sub>3</sub>                 |
| Cefbuperazone       | Antibiotic         | 76610-84-9  |      | C <sub>22</sub> H <sub>29</sub> N <sub>9</sub> O <sub>9</sub> S <sub>2</sub>                 |
| Cefcanel            | Antibiotic         | 41952-52-7  |      | C <sub>19</sub> H <sub>18</sub> N <sub>4</sub> O <sub>5</sub> S <sub>3</sub>                 |
| Cefcanel Daloxate   | Antibiotic         | 97275-40-6  |      | C <sub>27</sub> H <sub>27</sub> N <sub>5</sub> O <sub>9</sub> S <sub>3</sub>                 |
| Cefcapene           | Antibiotic         | 135889-00-8 | Y    | C <sub>17</sub> H <sub>19</sub> N <sub>5</sub> O <sub>6</sub> S <sub>2</sub>                 |
| Cefclidin           | Antibiotic         | 105239-91-6 |      | C <sub>21</sub> H <sub>26</sub> N <sub>8</sub> O <sub>6</sub> S <sub>2</sub>                 |
| Cefdaloxime         | Antibiotic         | 80195-36-4  |      | C <sub>14</sub> H <sub>15</sub> N <sub>5</sub> O <sub>6</sub> S <sub>2</sub>                 |
| Cefdinir            | Antibiotic         | 91832-40-5  | Y    | C <sub>14</sub> H <sub>13</sub> N <sub>5</sub> O <sub>5</sub> S <sub>2</sub>                 |
| Cefditoren          | Antibiotic         | 104145-95-1 | Y    | C <sub>19</sub> H <sub>18</sub> N <sub>6</sub> O <sub>5</sub> S <sub>3</sub>                 |
| Cefditoren Pivoxil  | Antibiotic         | 117467-28-4 | Y    | C <sub>25</sub> H <sub>28</sub> N <sub>6</sub> O <sub>7</sub> S <sub>3</sub>                 |
| Cefedrolor          | Antibiotic         | 57847-69-5  |      | C <sub>16</sub> H <sub>16</sub> ClN <sub>3</sub> O <sub>5</sub> S                            |
| Cefempidone         | Antibiotic         | 103238-57-9 |      | C <sub>22</sub> H <sub>21</sub> N <sub>7</sub> O <sub>6</sub> S <sub>2</sub>                 |
| Cefepime            | Antibiotic         | 88040-23-7  |      | C <sub>19</sub> H <sub>24</sub> N <sub>6</sub> O <sub>5</sub> S <sub>2</sub>                 |
| Cefetamet           | Antibiotic         | 65052-63-3  |      | C <sub>14</sub> H <sub>15</sub> N <sub>5</sub> O <sub>5</sub> S <sub>2</sub>                 |
| Cefetecol           | Antibiotic         | 117211-03-7 |      | C <sub>20</sub> H <sub>17</sub> N <sub>5</sub> O <sub>9</sub> S <sub>2</sub>                 |
| Cefetizole          | Antibiotic         | 65307-12-2  |      | C <sub>16</sub> H <sub>15</sub> N <sub>5</sub> O <sub>4</sub> S <sub>3</sub>                 |
| Cefivitril          | Antibiotic         | 66474-36-0  |      | C <sub>15</sub> H <sub>15</sub> N <sub>7</sub> O <sub>4</sub> S <sub>3</sub>                 |
| Cefixime            | Antibiotic         | 79350-37-1  |      | C <sub>16</sub> H <sub>15</sub> N <sub>5</sub> O <sub>7</sub> S <sub>2</sub>                 |

Table S1. Cont.

| Common Name            | Indication         | CAS Number  | Oral | Molecular Formula                                                                |
|------------------------|--------------------|-------------|------|----------------------------------------------------------------------------------|
| Cefluprenam            | Antibiotic         | 116853-25-9 |      | C <sub>20</sub> H <sub>25</sub> FN <sub>8</sub> O <sub>6</sub> S <sub>2</sub>    |
| Cefmatilen             | Antibiotic         | 140128-74-1 |      | C <sub>15</sub> H <sub>14</sub> N <sub>8</sub> O <sub>5</sub> S <sub>4</sub>     |
| Cefmenoxime            | Antibiotic         | 65085-01-0  |      | C <sub>16</sub> H <sub>17</sub> N <sub>9</sub> O <sub>5</sub> S <sub>3</sub>     |
| Cefmepidium Chloride   | Antibiotic         | 107452-79-9 |      | C <sub>23</sub> H <sub>25</sub> N <sub>6</sub> O <sub>8</sub> S <sub>3</sub> .Cl |
| Cefmetazole            | Antibiotic         | 56796-20-4  |      | C <sub>15</sub> H <sub>17</sub> N <sub>7</sub> O <sub>5</sub> S <sub>3</sub>     |
| Cefminox               | Antibiotic         | 84305-41-9  |      | C <sub>16</sub> H <sub>21</sub> N <sub>7</sub> O <sub>7</sub> S <sub>3</sub>     |
| Cefodizime             | Antibiotic         | 69739-16-8  |      | C <sub>20</sub> H <sub>20</sub> N <sub>6</sub> O <sub>7</sub> S <sub>4</sub>     |
| Cefonicid              | Antibiotic         | 61270-58-4  |      | C <sub>18</sub> H <sub>18</sub> N <sub>6</sub> O <sub>8</sub> S <sub>3</sub>     |
| Cefoperazone           | Antibiotic         | 62893-19-0  |      | C <sub>25</sub> H <sub>27</sub> N <sub>9</sub> O <sub>8</sub> S <sub>2</sub>     |
| Ceforanide             | Antibiotic         | 60925-61-3  |      | C <sub>20</sub> H <sub>21</sub> N <sub>7</sub> O <sub>6</sub> S <sub>2</sub>     |
| Cefoselis              | Antibiotic         | 122841-10-5 |      | C <sub>19</sub> H <sub>22</sub> N <sub>8</sub> O <sub>6</sub> S <sub>2</sub>     |
| Cefotaxime             | Antibiotic         | 63527-52-6  |      | C <sub>16</sub> H <sub>17</sub> N <sub>5</sub> O <sub>7</sub> S <sub>2</sub>     |
| Cefotetan              | Antibiotic         | 69712-56-7  |      | C <sub>17</sub> H <sub>17</sub> N <sub>7</sub> O <sub>8</sub> S <sub>4</sub>     |
| Cefotiam               | Antibiotic         | 61622-34-2  |      | C <sub>18</sub> H <sub>23</sub> N <sub>9</sub> O <sub>4</sub> S <sub>3</sub>     |
| Cefovecin Sodium       | Antibiotic         | 234096-34-5 |      | C <sub>17</sub> H <sub>19</sub> N <sub>5</sub> O <sub>6</sub> S <sub>2</sub>     |
| Cefoxazole             | Antibiotic         | 36920-48-6  |      | C <sub>21</sub> H <sub>18</sub> ClN <sub>3</sub> O <sub>7</sub> S                |
| Cefoxitin              | Antibiotic         | 35607-66-0  |      | C <sub>16</sub> H <sub>17</sub> N <sub>3</sub> O <sub>7</sub> S <sub>2</sub>     |
| Cefozopran             | Antibiotic         | 113359-04-9 |      | C <sub>19</sub> H <sub>17</sub> N <sub>9</sub> O <sub>5</sub> S <sub>2</sub>     |
| Cefpimizole            | Antibiotic         | 84880-03-5  |      | C <sub>28</sub> H <sub>26</sub> N <sub>6</sub> O <sub>10</sub> S <sub>2</sub>    |
| Cefpiramide            | Antibiotic         | 70797-11-4  |      | C <sub>25</sub> H <sub>24</sub> N <sub>8</sub> O <sub>7</sub> S <sub>2</sub>     |
| Cefpodoxime Proxetil   | Antibiotic         | 87239-81-4  | Y    | C <sub>21</sub> H <sub>27</sub> N <sub>5</sub> O <sub>9</sub> S <sub>2</sub>     |
| Cefprozil              | Antibiotic         | 92665-29-7  | Y    | C <sub>18</sub> H <sub>19</sub> N <sub>3</sub> O <sub>5</sub> S                  |
| Cefquinome Sulfate     | Antibiotic         | 118443-88-2 |      | C <sub>23</sub> H <sub>25</sub> N <sub>6</sub> O <sub>5</sub> S <sub>2</sub>     |
| Cefrotil               | Antibiotic         | 52231-20-6  |      | C <sub>20</sub> H <sub>22</sub> N <sub>4</sub> O <sub>4</sub> S                  |
| Cefroxadine            | Antibiotic         | 51762-05-1  |      | C <sub>16</sub> H <sub>19</sub> N <sub>3</sub> O <sub>5</sub> S                  |
| Cefsulodin Sodium      | Antibiotic         | 69705-63-1  |      | C <sub>22</sub> H <sub>21</sub> N <sub>4</sub> O <sub>8</sub> S <sub>2</sub>     |
| Cefsumide              | Antibiotic         | 54818-11-0  |      | C <sub>17</sub> H <sub>20</sub> N <sub>4</sub> O <sub>6</sub> S <sub>2</sub>     |
| Ceftazidime            | Antibiotic         | 72558-82-8  |      | C <sub>22</sub> H <sub>22</sub> N <sub>6</sub> O <sub>7</sub> S <sub>2</sub>     |
| Cefteram               | Antibiotic         | 82547-58-8  | Y    | C <sub>16</sub> H <sub>17</sub> N <sub>9</sub> O <sub>5</sub> S <sub>2</sub>     |
| Ceftazole              | Antibiotic         | 26973-24-0  |      | C <sub>13</sub> H <sub>12</sub> N <sub>8</sub> O <sub>4</sub> S <sub>3</sub>     |
| Ceftibuten             | Antibiotic         | 97519-39-6  | Y    | C <sub>15</sub> H <sub>14</sub> N <sub>4</sub> O <sub>6</sub> S <sub>2</sub>     |
| Ceftiofur              | Antibiotic         | 80370-57-6  |      | C <sub>19</sub> H <sub>17</sub> N <sub>5</sub> O <sub>7</sub> S <sub>3</sub>     |
| Ceftiolene             | Antibiotic         | 77360-52-2  |      | C <sub>20</sub> H <sub>18</sub> N <sub>8</sub> O <sub>8</sub> S <sub>3</sub>     |
| Ceftioxide             | Antibiotic         | 69132-42-9  |      | C <sub>16</sub> H <sub>17</sub> N <sub>5</sub> O <sub>8</sub> S <sub>2</sub>     |
| Ceftizoxime Alapivoxil | Antibiotic         | 135821-54-4 |      | C <sub>22</sub> H <sub>28</sub> N <sub>6</sub> O <sub>8</sub> S <sub>2</sub>     |
| Ceftizoxime            | Antibiotic         | 68401-81-0  |      | C <sub>13</sub> H <sub>13</sub> N <sub>5</sub> O <sub>5</sub> S <sub>2</sub>     |
| Ceftobiprole           | Antibiotic         | 209467-52-7 |      | C <sub>20</sub> H <sub>22</sub> N <sub>8</sub> O <sub>6</sub> S <sub>2</sub>     |
| Ceftobiprole Medocaril | Antibiotic         | 376653-43-9 |      | C <sub>26</sub> H <sub>26</sub> N <sub>8</sub> O <sub>11</sub> S <sub>2</sub>    |
| Ceftriaxone            | Antibiotic         | 73384-59-5  |      | C <sub>18</sub> H <sub>18</sub> N <sub>8</sub> O <sub>7</sub> S <sub>3</sub>     |
| Cefuracetime           | Antibiotic         | 39685-31-9  |      | C <sub>17</sub> H <sub>17</sub> N <sub>3</sub> O <sub>8</sub> S                  |
| Cefuroxime             | Antibiotic         | 55268-75-2  | Y    | C <sub>16</sub> H <sub>16</sub> N <sub>4</sub> O <sub>8</sub> S                  |
| Cefuroxime Axetil      | Antibiotic         | 64544-07-6  | Y    | C <sub>20</sub> H <sub>22</sub> N <sub>4</sub> O <sub>10</sub> S                 |
| Cefuroxime Pivoxetil   | Antibiotic         | 100680-33-9 |      | C <sub>23</sub> H <sub>28</sub> N <sub>4</sub> O <sub>11</sub> S                 |
| Cefuzonam              | Antibiotic         | 82219-78-1  |      | C <sub>16</sub> H <sub>15</sub> N <sub>7</sub> O <sub>5</sub> S <sub>4</sub>     |
| Celecoxib              | Antiinflammatory   | 169590-42-5 | Y    | C <sub>17</sub> H <sub>14</sub> F <sub>3</sub> N <sub>3</sub> O <sub>2</sub> S   |
| Celgosivir             | Antiviral          | 121104-96-9 | Y    | C <sub>12</sub> H <sub>21</sub> NO <sub>5</sub>                                  |
| Celiprolol             | Antihypertensive   | 56980-93-9  | Y    | C <sub>20</sub> H <sub>33</sub> N <sub>3</sub> O <sub>4</sub>                    |
| Cemadotin              | Antineoplastic     | 159776-69-9 |      | C <sub>35</sub> H <sub>56</sub> N <sub>6</sub> O <sub>5</sub>                    |
| Cephacetrile Sodium    | Antibiotic         | 10206-21-0  |      | C <sub>13</sub> H <sub>13</sub> N <sub>3</sub> O <sub>6</sub> S                  |
| Cephalexin             | Antibiotic         | 15686-71-2  | Y    | C <sub>16</sub> H <sub>17</sub> N <sub>3</sub> O <sub>4</sub> S                  |
| Cephaloglycin          | Antibiotic         | 3577-01-3   |      | C <sub>18</sub> H <sub>19</sub> N <sub>3</sub> O <sub>6</sub> S                  |
| Cephaloridine          | Antibiotic         | 50-59-9     |      | C <sub>19</sub> H <sub>17</sub> N <sub>3</sub> O <sub>4</sub> S <sub>2</sub>     |
| Cephalosporin C        | Antibiotic         | 61-24-5     |      | C <sub>16</sub> H <sub>21</sub> N <sub>3</sub> O <sub>8</sub> S                  |
| Cephalothin            | Antibiotic         | 153-61-7    |      | C <sub>16</sub> H <sub>16</sub> N <sub>2</sub> O <sub>6</sub> S <sub>2</sub>     |
| Cephapirin             | Antibiotic         | 21593-23-7  |      | C <sub>17</sub> H <sub>17</sub> N <sub>3</sub> O <sub>6</sub> S <sub>2</sub>     |
| Cepharanthine          | Antibiotic         | 481-49-2    |      | C <sub>37</sub> H <sub>38</sub> N <sub>2</sub> O <sub>6</sub>                    |
| Cephradine             | Antibiotic         | 38821-53-3  | Y    | C <sub>16</sub> H <sub>19</sub> N <sub>3</sub> O <sub>4</sub> S                  |
| Cericlamine            | Antidepressant     | 112922-55-1 |      | C <sub>12</sub> H <sub>17</sub> Cl <sub>2</sub> NO                               |
| Cerivastatin           | Antihyperlipidemic | 145599-86-6 |      | C <sub>26</sub> H <sub>34</sub> FNO <sub>5</sub>                                 |
| Ceronapril             | Antihypertensive   | 111223-26-8 |      | C <sub>21</sub> H <sub>33</sub> N <sub>2</sub> O <sub>6</sub> P                  |
| Cetaben Sodium         | Antihyperlipidemic | 55986-43-1  |      | C <sub>23</sub> H <sub>39</sub> NO <sub>2</sub>                                  |
| Cetalkonium Chloride   | Antibacterial      | 122-18-9    |      | C <sub>25</sub> H <sub>46</sub> ClN                                              |
| Cetamolol              | Antihypertensive   | 34919-98-7  |      | C <sub>16</sub> H <sub>26</sub> N <sub>2</sub> O <sub>4</sub>                    |

Table S1. Cont.

| Common Name               | Indication          | CAS Number  | Oral | Molecular Formula                                                                            |
|---------------------------|---------------------|-------------|------|----------------------------------------------------------------------------------------------|
| Cetefloxacin              | Antibiotic          | 141725-88-4 |      | C <sub>20</sub> H <sub>16</sub> F <sub>3</sub> N <sub>3</sub> O <sub>3</sub>                 |
| Cethromycin               | Antibacterial       | 205110-48-1 | Y    | C <sub>42</sub> H <sub>59</sub> N <sub>3</sub> O <sub>10</sub>                               |
| Cetiedil                  | Vasodilator         | 14176-10-4  |      | C <sub>20</sub> H <sub>31</sub> NO <sub>2</sub> S                                            |
| Cetilistat                | Anticoagulant       | 282526-98-1 | Y    | C <sub>25</sub> H <sub>39</sub> NO <sub>3</sub>                                              |
| Cetirizine                | Antihistaminic      | 83881-51-0  | Y    | C <sub>21</sub> H <sub>25</sub> ClN <sub>2</sub> O <sub>3</sub>                              |
| Cetocycline               | Antibacterial       | 29144-42-1  |      | C <sub>22</sub> H <sub>21</sub> NO <sub>7</sub>                                              |
| Cetohexazine              | Unclassified        | 7007-92-3   |      | C <sub>6</sub> H <sub>8</sub> N <sub>2</sub> O                                               |
| Cetophenicol              | Antibacterial       | 735-52-4    |      | C <sub>13</sub> H <sub>15</sub> Cl <sub>2</sub> NO <sub>4</sub>                              |
| Cetoxime                  | Antihistaminic      | 25394-78-9  |      | C <sub>15</sub> H <sub>17</sub> N <sub>3</sub> O                                             |
| Cetraxate                 | Antiulcerative      | 34675-84-8  | Y    | C <sub>17</sub> H <sub>23</sub> NO <sub>4</sub>                                              |
| Cevimeline                | Gastroprokinetic    | 107233-08-9 | Y    | C <sub>10</sub> H <sub>17</sub> NOS                                                          |
| Chaulmoogric Acid         | Antibacterial       | 29106-32-9  |      | C <sub>18</sub> H <sub>32</sub> O <sub>2</sub>                                               |
| Chaulmosulfone            | Antibacterial       | 473-32-5    |      | C <sub>48</sub> H <sub>76</sub> N <sub>2</sub> O <sub>4</sub> S                              |
| Chenodiol                 | Anticholelithogenic | 474-25-9    | Y    | C <sub>24</sub> H <sub>40</sub> O <sub>4</sub>                                               |
| Chiniofon                 | Antiamoebic         | 547-91-1    |      | C <sub>9</sub> H <sub>6</sub> INO <sub>4</sub> S                                             |
| Chlophedianol             | Antitussive         | 791-35-5    |      | C <sub>17</sub> H <sub>20</sub> ClNO                                                         |
| Chloracyzine              | Vasodilator         | 800-22-6    |      | C <sub>19</sub> H <sub>21</sub> ClN <sub>2</sub> O <sub>2</sub> S                            |
| Chloral Hydrate           | Sedative            | 302-17-0    |      | C <sub>2</sub> H <sub>3</sub> Cl <sub>3</sub> O <sub>2</sub>                                 |
| Chloralformamide          | Sedative            | 515-82-2    |      | C <sub>3</sub> H <sub>4</sub> Cl <sub>3</sub> NO <sub>2</sub>                                |
| Chloralose                | Sedative            | 15879-93-3  |      | C <sub>8</sub> H <sub>11</sub> Cl <sub>3</sub> O <sub>6</sub>                                |
| Chlorambucil              | Antineoplastic      | 305-03-3    | Y    | C <sub>14</sub> H <sub>19</sub> Cl <sub>2</sub> NO <sub>2</sub>                              |
| Chloramine-T              | Antibacterial       | 144-86-5    |      | C <sub>7</sub> H <sub>8</sub> ClNO <sub>2</sub> S                                            |
| Chloramphenicol           | Antibiotic          | 56-75-7     |      | C <sub>11</sub> H <sub>12</sub> Cl <sub>2</sub> N <sub>2</sub> O <sub>5</sub>                |
| Chloramphenicol Palmitate | Antibiotic          | 530-43-8    |      | C <sub>27</sub> H <sub>42</sub> Cl <sub>2</sub> N <sub>2</sub> O <sub>6</sub>                |
| Chloramphenicol Succinate | Antibiotic          | 3544-94-3   |      | C <sub>15</sub> H <sub>16</sub> Cl <sub>2</sub> N <sub>2</sub> O <sub>8</sub>                |
| Chloranil                 | Antifungal          | 118-75-2    |      | C <sub>6</sub> Cl <sub>4</sub> O <sub>2</sub>                                                |
| Chlorazaniol              | Antifungal          | 500-42-5    |      | C <sub>9</sub> H <sub>8</sub> ClN <sub>5</sub>                                               |
| Chlorbenzoxamine          | Antispasmodic       | 522-18-9    |      | C <sub>27</sub> H <sub>31</sub> ClN <sub>2</sub> O                                           |
| Chlorbetamide             | Antiamoebic         | 97-27-8     |      | C <sub>11</sub> H <sub>11</sub> Cl <sub>4</sub> NO <sub>2</sub>                              |
| Chlorcyclizine            | Antihistaminic      | 82-93-9     |      | C <sub>18</sub> H <sub>21</sub> ClN <sub>2</sub>                                             |
| Chlordantoin              | Antifungal          | 5588-20-5   |      | C <sub>11</sub> H <sub>17</sub> Cl <sub>3</sub> N <sub>2</sub> O <sub>2</sub> S              |
| Chlordiazepoxide          | Anxiolytic          | 58-25-3     | Y    | C <sub>16</sub> H <sub>14</sub> ClN <sub>3</sub> O                                           |
| Chlordimorine             | Unclassified        | 494-14-4    |      | C <sub>19</sub> H <sub>22</sub> ClNO <sub>2</sub>                                            |
| Chlorhexadol              | Sedative            | 3563-58-4   |      | C <sub>8</sub> H <sub>15</sub> Cl <sub>3</sub> O <sub>3</sub>                                |
| Chlorindanol              | Contraceptive       | 145-94-8    |      | C <sub>9</sub> H <sub>9</sub> ClO                                                            |
| Chlorisondamine           | Antihypertensive    | 69-27-2     |      | C <sub>14</sub> H <sub>20</sub> Cl <sub>6</sub> N <sub>2</sub>                               |
| Chlormadinone Acetate     | Progestogen         | 302-22-7    | Y    | C <sub>23</sub> H <sub>29</sub> ClO <sub>4</sub>                                             |
| Chlormezanone             | Anxiolytic          | 80-77-3     |      | C <sub>11</sub> H <sub>12</sub> ClNO <sub>3</sub> S                                          |
| Chlormidazole             | Antifungal          | 3689-76-7   |      | C <sub>15</sub> H <sub>13</sub> ClN <sub>2</sub>                                             |
| Chlornaphazine            | Antineoplastic      | 494-03-1    |      | C <sub>14</sub> H <sub>15</sub> Cl <sub>2</sub> N                                            |
| Chlorobutanol             | Analgesic           | 57-15-8     |      | C <sub>4</sub> H <sub>7</sub> Cl <sub>3</sub> O                                              |
| Chloroform                | Anesthetic          | 67-66-3     |      | CHCl <sub>3</sub>                                                                            |
| Chloroguanide             | Antimalarial        | 500-92-5    |      | C <sub>11</sub> H <sub>16</sub> ClN <sub>5</sub>                                             |
| Chlorophenothane          | Ectoparasiticide    | 50-29-3     |      | C <sub>14</sub> H <sub>9</sub> Cl <sub>5</sub>                                               |
| Chloroprednisone Acetate  | Glucocorticoid      | 14066-79-6  |      | C <sub>23</sub> H <sub>27</sub> ClO <sub>6</sub>                                             |
| Chloroprocaine            | Anesthetic          | 133-16-4    |      | C <sub>13</sub> H <sub>19</sub> ClN <sub>2</sub> O <sub>2</sub>                              |
| Chloropyramine            | Antihistaminic      | 59-32-5     |      | C <sub>16</sub> H <sub>20</sub> ClN <sub>3</sub>                                             |
| Chloroquine               | Antimalarial        | 54-05-7     | Y    | C <sub>18</sub> H <sub>26</sub> ClN <sub>3</sub>                                             |
| Chloroserpidine           | Antihypertensive    | 7008-24-4   |      | C <sub>32</sub> H <sub>37</sub> ClN <sub>2</sub> O <sub>8</sub>                              |
| Chlorothen Citrate        | Antihistaminic      | 148-65-2    |      | C <sub>14</sub> H <sub>18</sub> ClN <sub>3</sub> S                                           |
| Chlorothiazide            | Diuretic            | 58-94-6     | Y    | C <sub>7</sub> H <sub>6</sub> ClN <sub>3</sub> O <sub>4</sub> S <sub>2</sub>                 |
| Chlorotrianisene          | Estrogen            | 569-57-3    |      | C <sub>23</sub> H <sub>21</sub> ClO <sub>3</sub>                                             |
| Chloroxine                | Dermatologic        | 773-76-2    |      | C <sub>9</sub> H <sub>5</sub> Cl <sub>2</sub> NO                                             |
| Chlorphenesin Carbamate   | Muscle Relaxant     | 886-74-8    | Y    | C <sub>10</sub> H <sub>12</sub> ClNO <sub>4</sub>                                            |
| Chlorpheniramine          | Antihistaminic      | 132-22-9    | Y    | C <sub>16</sub> H <sub>19</sub> ClN <sub>2</sub>                                             |
| Chlorphenoctium Amsonate  | Unclassified        | 7168-18-5   |      | C <sub>31</sub> H <sub>41</sub> Cl <sub>2</sub> N <sub>3</sub> O <sub>7</sub> S <sub>2</sub> |
| Chlorphenoxamine          | Antihistaminic      | 77-38-3     |      | C <sub>18</sub> H <sub>22</sub> ClNO                                                         |
| Chlorphentermine          | Anorexic            | 461-78-9    |      | C <sub>10</sub> H <sub>14</sub> ClN                                                          |
| Chlorproethazine          | Analgesic           | 84-01-5     |      | C <sub>19</sub> H <sub>23</sub> ClN <sub>2</sub> S                                           |
| Chlorproguanil            | Antimalarial        | 537-21-3    |      | C <sub>11</sub> H <sub>15</sub> Cl <sub>2</sub> N <sub>5</sub>                               |
| Chlorpromazine            | Antiemetic          | 50-53-3     | Y    | C <sub>17</sub> H <sub>19</sub> ClN <sub>2</sub> S                                           |
| Chlorpropamide            | Antidiabetic        | 94-20-2     | Y    | C <sub>10</sub> H <sub>13</sub> ClN <sub>2</sub> O <sub>3</sub> S                            |
| Chlorprothixene           | Antipsychotic       | 113-59-7    |      | C <sub>18</sub> H <sub>18</sub> ClNS                                                         |

Table S1. Cont.

| Common Name             | Indication           | CAS Number  | Oral | Molecular Formula                                                 |
|-------------------------|----------------------|-------------|------|-------------------------------------------------------------------|
| Chlorpyrifos            | Ectoparasiticide     | 2921-88-2   |      | C <sub>9</sub> H <sub>11</sub> Cl <sub>3</sub> NO <sub>3</sub> PS |
| Chlorquinaldol          | Antibacterial        | 72-80-0     |      | C <sub>10</sub> H <sub>7</sub> Cl <sub>2</sub> NO                 |
| Chlortetracycline       | Antibiotic           | 57-62-5     |      | C <sub>22</sub> H <sub>23</sub> ClN <sub>2</sub> O <sub>8</sub>   |
| Chlorthalidone          | Diuretic             | 77-36-1     |      | C <sub>14</sub> H <sub>11</sub> ClN <sub>2</sub> O <sub>4</sub> S |
| Chlorthenoxazine        | Analgesic            | 132-89-8    |      | C <sub>10</sub> H <sub>10</sub> CINO <sub>2</sub>                 |
| Chlorzoxazone           | Muscle Relaxant      | 95-25-0     |      | C <sub>7</sub> H <sub>4</sub> CINO <sub>2</sub>                   |
| Cholic Acid             | Choleretic           | 81-25-4     | Y    | C <sub>24</sub> H <sub>40</sub> O <sub>5</sub>                    |
| Choline Alfoscerate     | Nootropic            | 28319-77-9  | Y    | C <sub>8</sub> H <sub>20</sub> NO <sub>6</sub> P                  |
| Choline                 | Cholinergic          | 62-49-7     |      | C <sub>5</sub> H <sub>14</sub> NO+                                |
| Choline Iodide Sebacate | Dermatologic         | 17140-07-7  |      | C <sub>20</sub> H <sub>42</sub> N <sub>2</sub> O <sub>4</sub> .2I |
| Chromocarb              | Capillary Protectant | 4940-39-0   |      | C <sub>10</sub> H <sub>6</sub> O <sub>4</sub>                     |
| Chromonar               | Vasodilator          | 804-10-4    |      | C <sub>20</sub> H <sub>27</sub> NO <sub>5</sub>                   |
| Ciadox                  | Antibacterial        | 65884-46-0  |      | C <sub>12</sub> H <sub>9</sub> N <sub>5</sub> O <sub>3</sub>      |
| Ciamexon                | Immunosuppressant    | 75985-31-8  |      | C <sub>11</sub> H <sub>13</sub> N <sub>3</sub> O                  |
| Cianergoline            | Antihypertensive     | 74627-35-3  |      | C <sub>19</sub> H <sub>22</sub> N <sub>4</sub> O                  |
| Cianidanol              | Antidiarrheal        | 154-23-4    |      | C <sub>15</sub> H <sub>14</sub> O <sub>6</sub>                    |
| Cianopramine            | Antidepressant       | 66834-24-0  |      | C <sub>20</sub> H <sub>23</sub> N <sub>3</sub>                    |
| Ciapilome               | Unclassified         | 53131-74-1  |      | C <sub>7</sub> H <sub>6</sub> N <sub>4</sub> O <sub>2</sub>       |
| Cicaprost               | Oxytocic             | 94079-80-8  |      | C <sub>22</sub> H <sub>30</sub> O <sub>5</sub>                    |
| Cicarperone             | Antipsychotic        | 54063-29-5  |      | C <sub>20</sub> H <sub>27</sub> FN <sub>2</sub> O <sub>3</sub>    |
| Ciclactate              | Unclassified         | 15145-14-9  |      | C <sub>12</sub> H <sub>22</sub> O <sub>3</sub>                    |
| Ciclafrine              | Antihypotensive      | 55694-98-9  |      | C <sub>15</sub> H <sub>21</sub> NO <sub>2</sub>                   |
| Ciclazindol             | Antidepressant       | 37751-39-6  |      | C <sub>17</sub> H <sub>15</sub> ClN <sub>2</sub> O                |
| Ciclesonide             | Glucocorticoid       | 126544-47-6 |      | C <sub>32</sub> H <sub>44</sub> O <sub>7</sub>                    |
| Cicletanine             | Antihypertensive     | 89943-82-8  | Y    | C <sub>14</sub> H <sub>12</sub> ClNO <sub>2</sub>                 |
| Ciclonicate             | Vasodilator          | 53449-58-4  |      | C <sub>15</sub> H <sub>21</sub> NO <sub>2</sub>                   |
| Ciclonium Bromide       | Antihypertensive     | 29546-59-6  |      | C <sub>22</sub> H <sub>34</sub> BrNO                              |
| Ciclopirox              | Antifungal           | 29342-05-0  |      | C <sub>12</sub> H <sub>17</sub> NO <sub>2</sub>                   |
| Ciclopirox Olamine      | Antifungal           | 41621-49-2  |      | C <sub>14</sub> H <sub>24</sub> N <sub>2</sub> O <sub>3</sub>     |
| Ciclopramine            | Antidepressant       | 33545-56-1  |      | C <sub>18</sub> H <sub>20</sub> N <sub>2</sub>                    |
| Cicloprofen             | Antiinflammatory     | 36950-96-6  |      | C <sub>16</sub> H <sub>14</sub> O <sub>2</sub>                    |
| Cicloprolol             | Antihypertensive     | 94651-09-9  |      | C <sub>18</sub> H <sub>29</sub> NO <sub>4</sub>                   |
| Ciclosidomine           | Antihypertensive     | 66564-16-7  |      | C <sub>13</sub> H <sub>20</sub> N <sub>4</sub> O <sub>3</sub>     |
| Ciclotizolam            | Anxiolytic           | 58765-21-2  |      | C <sub>20</sub> H <sub>18</sub> BrClN <sub>4</sub> S              |
| Ciclotropium Bromide    | Antibacterial        | 85166-20-7  |      | C <sub>24</sub> H <sub>36</sub> BrNO <sub>2</sub>                 |
| Cicloxilic Acid         | Gastroprokinetic     | 57808-63-6  |      | C <sub>13</sub> H <sub>16</sub> O <sub>3</sub>                    |
| Cicloxlone              | Antiviral            | 52247-86-6  |      | C <sub>38</sub> H <sub>56</sub> O <sub>7</sub>                    |
| Cicortonide             | Glucocorticoid       | 19705-61-4  |      | C <sub>29</sub> H <sub>37</sub> ClFNO <sub>7</sub>                |
| Cicrotoic Acid          | Choleretic           | 25229-42-9  |      | C <sub>10</sub> H <sub>16</sub> O <sub>2</sub>                    |
| Cidofovir               | Antiviral            | 113852-37-2 |      | C <sub>8</sub> H <sub>14</sub> N <sub>3</sub> O <sub>6</sub> P    |
| Cidoxepin               | Antidepressant       | 3607-18-9   |      | C <sub>19</sub> H <sub>21</sub> NO                                |
| Cifenline               | Antiarrhythmic       | 53267-01-9  | Y    | C <sub>18</sub> H <sub>18</sub> N <sub>2</sub>                    |
| Cifostodine             | Unclassified         | 633-90-9    |      | C <sub>9</sub> H <sub>12</sub> N <sub>3</sub> O <sub>7</sub> P    |
| Ciglitazone             | Antidiabetic         | 74772-77-3  |      | C <sub>18</sub> H <sub>23</sub> NO <sub>3</sub> S                 |
| Ciheptolane             | Unclassified         | 34753-46-3  |      | C <sub>20</sub> H <sub>23</sub> NO <sub>2</sub>                   |
| Ciladopa                | Antiparkinsonian     | 80109-27-9  |      | C <sub>21</sub> H <sub>26</sub> N <sub>2</sub> O <sub>4</sub>     |
| Cilansetron             | Antiemetic           | 120635-74-7 |      | C <sub>20</sub> H <sub>21</sub> N <sub>3</sub> O                  |
| Cilastatin              | Antibacterial        | 82009-34-5  |      | C <sub>16</sub> H <sub>26</sub> N <sub>2</sub> O <sub>5</sub> S   |
| Cilazapril              | Antihypertensive     | 88768-40-5  | Y    | C <sub>22</sub> H <sub>31</sub> N <sub>3</sub> O <sub>5</sub>     |
| Cilazaprilat            | Antihypertensive     | 90139-06-3  |      | C <sub>20</sub> H <sub>27</sub> N <sub>3</sub> O <sub>5</sub>     |
| Cilengitide             | Antineoplastic       | 188968-51-6 |      | C <sub>27</sub> H <sub>40</sub> N <sub>8</sub> O <sub>7</sub>     |
| Cilnidipine             | Antihypertensive     | 132203-70-4 | Y    | C <sub>27</sub> H <sub>28</sub> N <sub>2</sub> O <sub>7</sub>     |
| Cilobamine Mesylate     | Antidepressant       | 69429-84-1  |      | C <sub>17</sub> H <sub>23</sub> Cl <sub>2</sub> NO                |
| Cilobradine             | Antianginal          | 147541-45-5 |      | C <sub>28</sub> H <sub>38</sub> N <sub>2</sub> O <sub>5</sub>     |
| Cilomilast              | Bronchodilator       | 153259-65-5 |      | C <sub>20</sub> H <sub>25</sub> NO <sub>4</sub>                   |
| Cilostamide             | Erectile Dysfunction | 68550-75-4  |      | C <sub>20</sub> H <sub>26</sub> N <sub>2</sub> O <sub>3</sub>     |
| Cilostazol              | Antithrombotic       | 73963-72-1  | Y    | C <sub>20</sub> H <sub>27</sub> N <sub>5</sub> O <sub>2</sub>     |
| Ciltoprazine            | Nootropic            | 54063-30-8  |      | C <sub>23</sub> H <sub>29</sub> ClN <sub>4</sub> O <sub>3</sub>   |
| Ciluprevir              | Antiviral            | 300832-84-2 |      | C <sub>40</sub> H <sub>50</sub> N <sub>6</sub> O <sub>8</sub> S   |
| Cilutazoline            | Antihypertensive     | 104902-08-1 |      | C <sub>14</sub> H <sub>18</sub> N <sub>2</sub> O                  |
| Cimaterol               | Bronchodilator       | 54239-37-1  |      | C <sub>12</sub> H <sub>17</sub> N <sub>3</sub> O                  |
| Cimemoxin               | Antipsychotic        | 3788-16-7   |      | C <sub>7</sub> H <sub>16</sub> N <sub>2</sub>                     |
| Cimepanol               | Antianginal          | 29474-12-2  |      | C <sub>10</sub> H <sub>20</sub> O                                 |

Table S1. Cont.

| Common Name          | Indication         | CAS Number  | Oral | Molecular Formula                                                             |
|----------------------|--------------------|-------------|------|-------------------------------------------------------------------------------|
| Cimetidine           | Antilulcerative    | 51481-61-9  | Y    | C <sub>10</sub> H <sub>16</sub> N <sub>6</sub> S                              |
| Cimetropium Bromide  | Antispasmodic      | 51598-60-8  | Y    | C <sub>21</sub> H <sub>28</sub> BrNO <sub>4</sub>                             |
| Cimicoxib            | Antiinflammatory   | 265114-23-6 |      | C <sub>16</sub> H <sub>13</sub> ClFN <sub>3</sub> O <sub>3</sub> S            |
| Cimoxatone           | Antidepressant     | 73815-11-9  |      | C <sub>19</sub> H <sub>18</sub> N <sub>2</sub> O <sub>4</sub>                 |
| Cinacalcet           | Pituitary          | 226256-56-0 | Y    | C <sub>22</sub> H <sub>22</sub> F <sub>3</sub> N                              |
| Cinalukast           | Bronchodilator     | 128312-51-6 |      | C <sub>23</sub> H <sub>28</sub> N <sub>2</sub> O <sub>3</sub> S               |
| Cinametic Acid       | Gastroprokinetic   | 35703-32-3  |      | C <sub>12</sub> H <sub>14</sub> O <sub>5</sub>                                |
| Cinamolol            | Antihypotensive    | 39099-98-4  |      | C <sub>16</sub> H <sub>23</sub> NO <sub>4</sub>                               |
| Cinanserin           | Antidepressant     | 1166-34-3   |      | C <sub>20</sub> H <sub>24</sub> N <sub>2</sub> OS                             |
| Cinaproxen           | Antiinflammatory   | 89163-44-0  |      | C <sub>19</sub> H <sub>21</sub> NO <sub>5</sub> S                             |
| Cinchonidine         | Antimalarial       | 485-71-2    |      | C <sub>19</sub> H <sub>22</sub> N <sub>2</sub> O                              |
| Cinchonine           | Antimalarial       | 118-10-5    | Y    | C <sub>19</sub> H <sub>22</sub> N <sub>2</sub> O                              |
| Cinchophen           | Analgesic          | 132-60-5    |      | C <sub>16</sub> H <sub>11</sub> NO <sub>2</sub>                               |
| Cinecromen           | Antithrombotic     | 62380-23-8  |      | C <sub>34</sub> H <sub>41</sub> N <sub>3</sub> O <sub>10</sub>                |
| Cinepaxadil          | Unclassified       | 69118-25-8  |      | C <sub>29</sub> H <sub>36</sub> N <sub>2</sub> O <sub>9</sub>                 |
| Cinepazet            | Antianginal        | 23887-41-4  |      | C <sub>20</sub> H <sub>28</sub> N <sub>2</sub> O <sub>6</sub>                 |
| Cinepazic Acid       | Unclassified       | 54063-23-9  |      | C <sub>18</sub> H <sub>24</sub> N <sub>2</sub> O <sub>6</sub>                 |
| Cinepazide           | Vasodilator        | 23887-46-9  |      | C <sub>22</sub> H <sub>31</sub> N <sub>3</sub> O <sub>5</sub>                 |
| Cinfenine            | Antispasmodic      | 54141-87-6  |      | C <sub>25</sub> H <sub>27</sub> NO                                            |
| Cinfeoac             | Antiinflammatory   | 66984-59-6  |      | C <sub>18</sub> H <sub>14</sub> O <sub>6</sub>                                |
| Cinlumide            | Muscle Relaxant    | 64379-93-7  |      | C <sub>12</sub> H <sub>12</sub> FNO                                           |
| Cingestol            | Progestogen        | 16915-71-2  |      | C <sub>20</sub> H <sub>28</sub> O                                             |
| Cinitapride          | Gastroprokinetic   | 66564-14-5  | Y    | C <sub>21</sub> H <sub>30</sub> N <sub>4</sub> O <sub>4</sub>                 |
| Cinmetacin           | Antiinflammatory   | 20168-99-4  |      | C <sub>21</sub> H <sub>19</sub> NO <sub>4</sub>                               |
| Cinnamaverine        | Analgesic          | 1679-75-0   |      | C <sub>21</sub> H <sub>25</sub> NO <sub>2</sub>                               |
| Cinnamedrine         | Antispasmodic      | 90-86-8     |      | C <sub>19</sub> H <sub>23</sub> NO                                            |
| Cinnarizine          | Antihistaminic     | 298-57-7    | Y    | C <sub>26</sub> H <sub>28</sub> N <sub>2</sub>                                |
| Cinnofuradione       | Unclassified       | 477-80-5    |      | C <sub>20</sub> H <sub>18</sub> N <sub>2</sub> O <sub>3</sub>                 |
| Cinocetamide         | Anesthetic         | 28598-08-5  |      | C <sub>19</sub> H <sub>27</sub> NO <sub>4</sub>                               |
| Cinolazepam          | Sedative           | 75696-02-5  | Y    | C <sub>18</sub> H <sub>13</sub> ClFN <sub>3</sub> O <sub>2</sub>              |
| Cinoquidox           | Antibacterial      | 64557-97-7  |      | C <sub>13</sub> H <sub>12</sub> N <sub>4</sub> O <sub>3</sub>                 |
| Cinoxacin            | Antibiotic         | 28657-80-9  |      | C <sub>12</sub> H <sub>10</sub> N <sub>2</sub> O <sub>5</sub>                 |
| Cinoxate             | Dermatologic       | 104-28-9    |      | C <sub>14</sub> H <sub>18</sub> O <sub>4</sub>                                |
| Cinoxolone           | Antilulcerative    | 31581-02-9  |      | C <sub>41</sub> H <sub>56</sub> O <sub>5</sub>                                |
| Cinoxopazide         | Vasodilator        | 88053-05-8  |      | C <sub>20</sub> H <sub>25</sub> N <sub>3</sub> O <sub>4</sub>                 |
| Cinperene            | Antipsychotic      | 14796-24-8  |      | C <sub>25</sub> H <sub>28</sub> N <sub>2</sub> O <sub>2</sub>                 |
| Cinprazole           | Antilulcerative    | 51493-19-7  |      | C <sub>30</sub> H <sub>32</sub> N <sub>4</sub> O                              |
| Cinpropazide         | Vasodilator        | 23887-47-0  |      | C <sub>21</sub> H <sub>31</sub> N <sub>3</sub> O <sub>5</sub>                 |
| Cinromide            | Anticonvulsant     | 58473-74-8  |      | C <sub>11</sub> H <sub>12</sub> BrNO                                          |
| Cintazone            | Antiinflammatory   | 2056-56-6   |      | C <sub>22</sub> H <sub>22</sub> N <sub>2</sub> O <sub>2</sub>                 |
| Cintramide           | Antipsychotic      | 5588-21-6   |      | C <sub>12</sub> H <sub>15</sub> NO <sub>4</sub>                               |
| Cinuperone           | Antipsychotic      | 82117-51-9  |      | C <sub>23</sub> H <sub>24</sub> FN <sub>3</sub> O                             |
| Cioteronel           | Dermatologic       | 89672-11-7  |      | C <sub>16</sub> H <sub>28</sub> O <sub>2</sub>                                |
| Cipamfylline         | Antiviral          | 132210-43-6 |      | C <sub>13</sub> H <sub>17</sub> N <sub>5</sub> O <sub>2</sub>                 |
| Cipemastat           | Antirheumatic      | 190648-49-8 |      | C <sub>22</sub> H <sub>36</sub> N <sub>4</sub> O <sub>5</sub>                 |
| Ciprafamide          | Antiamoebic        | 35452-73-4  |      | C <sub>21</sub> H <sub>24</sub> N <sub>2</sub> O                              |
| Cipralisant          | Nootropic          | 213027-19-1 |      | C <sub>14</sub> H <sub>20</sub> N <sub>2</sub>                                |
| Ciprazafone          | Anticonvulsant     | 75616-03-4  |      | C <sub>19</sub> H <sub>18</sub> Cl <sub>2</sub> N <sub>2</sub> O <sub>2</sub> |
| Ciprefadol Succinate | Analgesic          | 59889-36-0  |      | C <sub>19</sub> H <sub>27</sub> NO                                            |
| Ciprocinnolone       | Steroid            | 58524-83-7  |      | C <sub>28</sub> H <sub>34</sub> F <sub>2</sub> O <sub>7</sub>                 |
| Ciprofibrate         | Antihyperlipidemic | 52214-84-3  | Y    | C <sub>13</sub> H <sub>14</sub> Cl <sub>2</sub> O <sub>3</sub>                |
| Ciprofloxacin        | Antibiotic         | 85721-33-1  | Y    | C <sub>17</sub> H <sub>18</sub> FN <sub>3</sub> O <sub>3</sub>                |
| Ciprokiren           | Antihypertensive   | 143631-62-3 |      | C <sub>37</sub> H <sub>55</sub> N <sub>5</sub> O <sub>8</sub> S               |
| Cipropride           | Antiemetic         | 68475-40-1  |      | C <sub>17</sub> H <sub>25</sub> N <sub>3</sub> O <sub>4</sub> S               |
| Ciproquazone         | Analgesic          | 33453-23-5  |      | C <sub>19</sub> H <sub>18</sub> N <sub>2</sub> O <sub>2</sub>                 |
| Ciprostene Calcium   | Anticoagulant      | 81845-44-5  |      | C <sub>22</sub> H <sub>36</sub> O <sub>4</sub>                                |
| Ciramadol            | Analgesic          | 63269-31-8  |      | C <sub>15</sub> H <sub>23</sub> NO <sub>2</sub>                               |
| Cirazoline           | Antidepressant     | 59939-16-1  |      | C <sub>13</sub> H <sub>16</sub> N <sub>2</sub> O                              |
| Cisapride            | Gastroprokinetic   | 81098-60-4  | Y    | C <sub>23</sub> H <sub>29</sub> ClFN <sub>3</sub> O <sub>4</sub>              |
| Cisconazole          | Antifungal         | 104456-95-3 |      | C <sub>19</sub> H <sub>15</sub> F <sub>3</sub> N <sub>2</sub> OS              |
| Cismadinone          | Progestogen        | 54063-31-9  |      | C <sub>21</sub> H <sub>27</sub> ClO <sub>3</sub>                              |
| Citalopram           | Antidepressant     | 59729-33-8  | Y    | C <sub>20</sub> H <sub>21</sub> FN <sub>2</sub> O                             |
| Citatepine           | Antipsychotic      | 65509-66-2  |      | C <sub>20</sub> H <sub>18</sub> N <sub>2</sub> S                              |

Table S1. Cont.

| Common Name           | Indication           | CAS Number  | Oral | Molecular Formula                                                              |
|-----------------------|----------------------|-------------|------|--------------------------------------------------------------------------------|
| Citenamide            | Anticonvulsant       | 10423-37-7  |      | C <sub>16</sub> H <sub>13</sub> NO                                             |
| Citenazone            | Antiviral            | 21512-15-2  |      | C <sub>7</sub> H <sub>6</sub> N <sub>4</sub> S <sub>2</sub>                    |
| Citicoline Sodium     | Nootropic            | 987-78-0    | Y    | C <sub>14</sub> H <sub>26</sub> N <sub>4</sub> O <sub>11</sub> P <sub>2</sub>  |
| Citolone              | Hepatic Protectant   | 1195-16-0   |      | C <sub>6</sub> H <sub>9</sub> NO <sub>2</sub> S                                |
| Citric Acid           | Anticoagulant        | 77-92-9     | Y    | C <sub>6</sub> H <sub>8</sub> O <sub>7</sub>                                   |
| Cizolirtine           | Antipsychotic        | 142155-43-9 |      | C <sub>15</sub> H <sub>21</sub> N <sub>3</sub> O                               |
| Cladribine            | Antineoplastic       | 4291-63-8   |      | C <sub>10</sub> H <sub>12</sub> ClN <sub>5</sub> O <sub>3</sub>                |
| Clamidoxic Acid       | Antibiotic           | 6170-69-0   |      | C <sub>15</sub> H <sub>11</sub> Cl <sub>2</sub> NO <sub>4</sub>                |
| Clamikalant           | Antiarrhythmic       | 158751-64-5 |      | C <sub>19</sub> H <sub>22</sub> ClN <sub>3</sub> O <sub>5</sub> S <sub>2</sub> |
| Clamoxyquin           | Antiamoebic          | 2545-39-3   |      | C <sub>17</sub> H <sub>24</sub> ClN <sub>3</sub> O                             |
| Clanfenuur            | Antineoplastic       | 51213-99-1  |      | C <sub>16</sub> H <sub>15</sub> ClFN <sub>3</sub> O <sub>2</sub>               |
| Clanobutin            | Choleretic           | 30544-61-7  |      | C <sub>18</sub> H <sub>18</sub> ClNO <sub>4</sub>                              |
| Clantifen             | Antihistaminic       | 16562-98-4  |      | C <sub>11</sub> H <sub>7</sub> Cl <sub>2</sub> NO <sub>2</sub> S               |
| Clarithromycin        | Antibiotic           | 81103-11-9  | Y    | C <sub>38</sub> H <sub>69</sub> NO <sub>13</sub>                               |
| Clavulanic Acid       | Antibiotic           | 58001-44-8  |      | C <sub>8</sub> H <sub>9</sub> NO <sub>5</sub>                                  |
| Clazolam              | Anxiolytic           | 7492-29-7   |      | C <sub>18</sub> H <sub>17</sub> ClN <sub>2</sub> O                             |
| Clazolimine           | Diuretic             | 40828-44-2  |      | C <sub>10</sub> H <sub>10</sub> ClN <sub>3</sub> O                             |
| Clazosentan           | Antihistaminic       | 180384-56-9 |      | C <sub>25</sub> H <sub>23</sub> N <sub>9</sub> O <sub>6</sub> S                |
| Clazuril              | Antibacterial        | 101831-36-1 |      | C <sub>17</sub> H <sub>10</sub> Cl <sub>2</sub> N <sub>4</sub> O <sub>2</sub>  |
| Clebopride            | Antiemetic           | 55905-53-8  |      | C <sub>20</sub> H <sub>24</sub> ClN <sub>3</sub> O <sub>2</sub>                |
| Clefamide             | Antiamoebic          | 3576-64-5   |      | C <sub>17</sub> H <sub>16</sub> Cl <sub>2</sub> N <sub>2</sub> O <sub>5</sub>  |
| Clemastine            | Antihistaminic       | 15686-51-8  | Y    | C <sub>21</sub> H <sub>26</sub> ClNO                                           |
| Clemeprol             | Choleretic           | 71827-56-0  |      | C <sub>17</sub> H <sub>20</sub> ClNO                                           |
| Clemizole             | Antihistaminic       | 442-52-4    |      | C <sub>19</sub> H <sub>20</sub> ClN <sub>3</sub>                               |
| Clenbuterol           | Bronchodilator       | 37148-27-9  | Y    | C <sub>12</sub> H <sub>18</sub> Cl <sub>2</sub> N <sub>2</sub> O               |
| Clenpirin             | Analgesic            | 27050-41-5  |      | C <sub>14</sub> H <sub>18</sub> Cl <sub>2</sub> N <sub>2</sub>                 |
| Clentiazem Maleate    | Antihypertensive     | 96125-53-0  |      | C <sub>22</sub> H <sub>25</sub> ClN <sub>2</sub> O <sub>4</sub> S              |
| Cletoquine            | Antibiotic           | 4298-15-1   |      | C <sub>16</sub> H <sub>22</sub> ClN <sub>3</sub> O                             |
| Clevidipine           | Antihypertensive     | 167221-71-8 |      | C <sub>21</sub> H <sub>23</sub> Cl <sub>2</sub> NO <sub>6</sub>                |
| Clevudine             | Antiviral            | 163252-36-6 | Y    | C <sub>10</sub> H <sub>13</sub> FN <sub>2</sub> O <sub>5</sub>                 |
| Clibucaine            | Analgesic            | 15302-10-0  |      | C <sub>15</sub> H <sub>20</sub> Cl <sub>2</sub> N <sub>2</sub> O               |
| Clidafidine           | Sedative             | 33588-20-4  |      | C <sub>9</sub> H <sub>8</sub> Cl <sub>2</sub> N <sub>2</sub> O                 |
| Clidanac              | Antiinflammatory     | 34148-01-1  |      | C <sub>16</sub> H <sub>19</sub> ClO <sub>2</sub>                               |
| Clidinium             | Antispasmodic        | 7020-55-5   |      | C <sub>22</sub> H <sub>26</sub> NO <sub>3</sub>                                |
| Climazolam            | Anesthetic           | 59467-77-5  |      | C <sub>18</sub> H <sub>13</sub> Cl <sub>2</sub> N <sub>3</sub>                 |
| Climbazole            | Antifungal           | 38083-17-9  |      | C <sub>15</sub> H <sub>17</sub> ClN <sub>2</sub> O <sub>2</sub>                |
| Climiqualine          | Anxiolytic           | 55150-67-9  |      | C <sub>18</sub> H <sub>12</sub> ClN <sub>3</sub>                               |
| Clinafloxacin         | Antibiotic           | 105956-97-6 |      | C <sub>17</sub> H <sub>17</sub> ClFN <sub>3</sub> O <sub>3</sub>               |
| Clindamycin           | Antibiotic           | 18323-44-9  | Y    | C <sub>18</sub> H <sub>33</sub> ClN <sub>2</sub> O <sub>5</sub> S              |
| Clindamycin Palmitate | Antibiotic           | 36688-78-5  |      | C <sub>34</sub> H <sub>63</sub> ClN <sub>2</sub> O <sub>6</sub> S              |
| Clindamycin Phosphate | Antibiotic           | 24729-96-2  |      | C <sub>18</sub> H <sub>34</sub> ClN <sub>2</sub> O <sub>8</sub> PS             |
| Clinofibrate          | Antihyperlipidemic   | 30299-08-2  | Y    | C <sub>28</sub> H <sub>36</sub> O <sub>6</sub>                                 |
| Clinolamide           | Diuretic             | 3207-50-9   |      | C <sub>24</sub> H <sub>43</sub> NO                                             |
| Clinprost             | Anticoagulant        | 88931-51-5  |      | C <sub>22</sub> H <sub>36</sub> O <sub>4</sub>                                 |
| Clioquinol            | Antibacterial        | 130-26-7    |      | C <sub>9</sub> H <sub>5</sub> ClINO                                            |
| Clixanide             | Anthelmintic         | 14437-41-3  |      | C <sub>15</sub> H <sub>10</sub> Cl <sub>2</sub> NO <sub>3</sub>                |
| Cliprofen             | Antiinflammatory     | 51022-75-4  |      | C <sub>14</sub> H <sub>11</sub> ClO <sub>3</sub> S                             |
| Cliropamine           | Cardiotonic          | 109525-44-2 |      | C <sub>19</sub> H <sub>25</sub> NO <sub>2</sub>                                |
| Clobazam              | Anxiolytic           | 22316-47-8  | Y    | C <sub>16</sub> H <sub>13</sub> ClN <sub>2</sub> O <sub>2</sub>                |
| Clobenoxide           | Capillary Protectant | 29899-95-4  |      | C <sub>25</sub> H <sub>32</sub> Cl <sub>2</sub> O <sub>6</sub>                 |
| Clobenzepam           | Antihistaminic       | 1159-93-9   |      | C <sub>17</sub> H <sub>18</sub> ClN <sub>3</sub> O                             |
| Clobenzorex           | Anorexic             | 13364-32-4  |      | C <sub>16</sub> H <sub>18</sub> ClN                                            |
| Clobenztropine        | Antihistaminic       | 5627-46-3   |      | C <sub>21</sub> H <sub>24</sub> ClNO                                           |
| Clobetasol Propionate | Glucocorticoid       | 25122-46-7  |      | C <sub>25</sub> H <sub>32</sub> ClFO <sub>5</sub>                              |
| Clobetasone Butyrate  | Glucocorticoid       | 25122-57-0  |      | C <sub>26</sub> H <sub>32</sub> ClFO <sub>5</sub>                              |
| Clobutinol            | Antitussive          | 14860-49-2  |      | C <sub>14</sub> H <sub>22</sub> ClNO                                           |
| Clobuzarit            | Antirheumatic        | 22494-47-9  |      | C <sub>17</sub> H <sub>17</sub> ClO <sub>3</sub>                               |
| Clocanfamide          | Antineoplastic       | 18966-32-0  |      | C <sub>18</sub> H <sub>24</sub> ClNO <sub>2</sub>                              |
| Clocapramine          | Antipsychotic        | 47739-98-0  |      | C <sub>28</sub> H <sub>37</sub> ClN <sub>4</sub> O                             |
| Clociguanil           | Antimalarial         | 3378-93-6   |      | C <sub>13</sub> H <sub>16</sub> Cl <sub>2</sub> N <sub>4</sub> O               |
| Clocinazine           | Antihistaminic       | 298-55-5    |      | C <sub>26</sub> H <sub>27</sub> ClN <sub>2</sub>                               |
| Clocortolone Acetate  | Glucocorticoid       | 4258-85-9   |      | C <sub>24</sub> H <sub>30</sub> ClFO <sub>5</sub>                              |
| Clocortolone Pivalate | Glucocorticoid       | 34097-16-0  |      | C <sub>27</sub> H <sub>36</sub> ClFO <sub>5</sub>                              |

Table S1. Cont.

| Common Name          | Indication            | CAS Number  | Oral | Molecular Formula                                                               |
|----------------------|-----------------------|-------------|------|---------------------------------------------------------------------------------|
| Clocoumarol          | Anticoagulant         | 35838-63-2  |      | C <sub>21</sub> H <sub>21</sub> ClO <sub>3</sub>                                |
| Clodacaine           | Anesthetic            | 5626-25-5   |      | C <sub>16</sub> H <sub>26</sub> ClN <sub>3</sub> O                              |
| Clodanolene          | Muscle Relaxant       | 14796-28-2  |      | C <sub>14</sub> H <sub>9</sub> Cl <sub>2</sub> N <sub>3</sub> O <sub>3</sub>    |
| Clodazon             | Antidepressant        | 4755-59-3   |      | C <sub>18</sub> H <sub>20</sub> ClN <sub>3</sub> O                              |
| Clodoxopone          | Antiparkinsonian      | 71923-34-7  |      | C <sub>21</sub> H <sub>21</sub> ClN <sub>2</sub> O <sub>3</sub>                 |
| Clofarabine          | Antineoplastic        | 123318-82-1 |      | C <sub>10</sub> H <sub>11</sub> ClFN <sub>5</sub> O <sub>3</sub>                |
| Clofazimine          | Antibacterial         | 2030-63-9   |      | C <sub>22</sub> H <sub>27</sub> Cl <sub>2</sub> N <sub>4</sub>                  |
| Clofenamic Acid      | Antiinflammatory      | 4295-55-0   |      | C <sub>13</sub> H <sub>9</sub> Cl <sub>2</sub> NO <sub>2</sub>                  |
| Clofenamide          | Diuretic              | 671-95-4    |      | C <sub>6</sub> H <sub>7</sub> ClN <sub>2</sub> O <sub>4</sub> S <sub>2</sub>    |
| Clofenciclan         | Unclassified          | 5632-52-0   |      | C <sub>18</sub> H <sub>28</sub> ClNO                                            |
| Clofenetamine        | Decongestant          | 511-46-6    |      | C <sub>20</sub> H <sub>26</sub> ClNO                                            |
| Clofenoxyde          | Unclassified          | 3030-53-3   |      | C <sub>16</sub> H <sub>12</sub> Cl <sub>2</sub> O <sub>3</sub>                  |
| Clofeverine          | Analgesic             | 54340-63-5  |      | C <sub>16</sub> H <sub>16</sub> ClNO <sub>3</sub>                               |
| Clofexamide          | Antiinflammatory      | 1223-36-5   |      | C <sub>14</sub> H <sub>21</sub> ClN <sub>2</sub> O <sub>2</sub>                 |
| Clofibrate           | Antihyperlipidemic    | 637-07-0    | Y    | C <sub>12</sub> H <sub>15</sub> ClO <sub>3</sub>                                |
| Clofibrilic Acid     | Antihyperlipidemic    | 882-09-7    |      | C <sub>10</sub> H <sub>11</sub> ClO <sub>3</sub>                                |
| Clofibrilide         | Antihyperlipidemic    | 26717-47-5  |      | C <sub>16</sub> H <sub>22</sub> ClNO <sub>4</sub>                               |
| Clofilium Phosphate  | Antiarrhythmic        | 68379-03-3  |      | C <sub>21</sub> H <sub>37</sub> ClN.H <sub>2</sub> O <sub>4</sub> P             |
| Clofoctol            | Antibiotic            | 37693-01-9  |      | C <sub>21</sub> H <sub>26</sub> Cl <sub>2</sub> O                               |
| Cloforex             | Anorexic              | 14261-75-7  |      | C <sub>13</sub> H <sub>18</sub> ClNO <sub>2</sub>                               |
| Clofurac             | Analgesic             | 60986-89-2  |      | C <sub>14</sub> H <sub>15</sub> ClO <sub>2</sub>                                |
| Clogestone Acetate   | Progestogen           | 3044-32-4   |      | C <sub>25</sub> H <sub>33</sub> ClO <sub>5</sub>                                |
| Cloguanamil          | Muscle Relaxant       | 21702-93-2  |      | C <sub>9</sub> H <sub>8</sub> ClN <sub>5</sub> O                                |
| Clomacran Phosphate  | Antipsychotic         | 5310-55-4   |      | C <sub>18</sub> H <sub>21</sub> ClN <sub>2</sub>                                |
| Clomegestone Acetate | Progestogen           | 424-89-5    |      | C <sub>24</sub> H <sub>31</sub> ClO <sub>4</sub>                                |
| Clometacin           | Analgesic             | 25803-14-9  |      | C <sub>19</sub> H <sub>16</sub> ClNO <sub>4</sub>                               |
| Clometherone         | Pituitary             | 5591-27-5   |      | C <sub>22</sub> H <sub>31</sub> ClO <sub>2</sub>                                |
| Clomethiazole        | Sedative              | 533-45-9    |      | C <sub>6</sub> H <sub>8</sub> ClNS                                              |
| Clometocillin        | Antibiotic            | 1926-49-4   |      | C <sub>17</sub> H <sub>18</sub> Cl <sub>2</sub> N <sub>2</sub> O <sub>5</sub> S |
| Clomifenoxide        | Antidepressant        | 97642-74-5  |      | C <sub>26</sub> H <sub>28</sub> ClNO <sub>2</sub>                               |
| Clominorex           | Anorexic              | 3876-10-6   |      | C <sub>9</sub> H <sub>9</sub> ClN <sub>2</sub> O                                |
| Clomiphene           | Estrogen              | 911-45-5    | Y    | C <sub>26</sub> H <sub>28</sub> ClNO                                            |
| Clomipramine         | Antidepressant        | 303-49-1    | Y    | C <sub>19</sub> H <sub>23</sub> ClN <sub>2</sub>                                |
| Clomocycline         | Antibiotic            | 1181-54-0   |      | C <sub>23</sub> H <sub>25</sub> ClN <sub>2</sub> O <sub>9</sub>                 |
| Clomoxir             | Antidiabetic          | 88431-47-4  |      | C <sub>14</sub> H <sub>17</sub> O <sub>3</sub> Cl                               |
| Clonazepam           | Anticonvulsant        | 1622-61-3   | Y    | C <sub>15</sub> H <sub>10</sub> ClN <sub>3</sub> O <sub>3</sub>                 |
| Clonazoline          | Decongestant          | 17692-28-3  |      | C <sub>14</sub> H <sub>13</sub> ClN <sub>2</sub>                                |
| Clonidine            | Antihypertensive      | 4205-90-7   | Y    | C <sub>9</sub> H <sub>9</sub> Cl <sub>2</sub> N <sub>3</sub>                    |
| Clonitazene          | Analgesic             | 3861-76-5   |      | C <sub>20</sub> H <sub>23</sub> ClN <sub>4</sub> O <sub>2</sub>                 |
| Clonitrate           | Vasodilator           | 2612-33-1   |      | C <sub>3</sub> H <sub>5</sub> ClN <sub>2</sub> O <sub>6</sub>                   |
| Clonixeril           | Analgesic             | 21829-22-1  |      | C <sub>16</sub> H <sub>17</sub> ClN <sub>2</sub> O <sub>4</sub>                 |
| Clonixin             | Analgesic             | 17737-65-4  |      | C <sub>13</sub> H <sub>11</sub> ClN <sub>2</sub> O <sub>2</sub>                 |
| Cloпамide            | Antihypertensive      | 636-54-4    | Y    | C <sub>14</sub> H <sub>20</sub> ClN <sub>3</sub> O <sub>5</sub> S               |
| Cloпenthixol         | Antipsychotic         | 982-24-1    | Y    | C <sub>22</sub> H <sub>25</sub> ClN <sub>2</sub> OS                             |
| Cloperastine         | Antitussive           | 3703-76-2   |      | C <sub>20</sub> H <sub>24</sub> ClNO                                            |
| Cloperidone          | Sedative              | 4052-13-5   |      | C <sub>21</sub> H <sub>23</sub> ClN <sub>4</sub> O <sub>2</sub>                 |
| Clopidogrel Sulfate  | Anticoagulant         | 113665-84-2 |      | C <sub>16</sub> H <sub>16</sub> ClNO <sub>2</sub> S                             |
| Clopidol             | Antibacterial         | 2971-90-6   |      | C <sub>7</sub> H <sub>7</sub> Cl <sub>2</sub> NO                                |
| Cloпimozide          | Antipsychotic         | 53179-12-7  |      | C <sub>28</sub> H <sub>28</sub> ClF <sub>2</sub> N <sub>3</sub> O               |
| Cloпipazan Mesylate  | Antipsychotic         | 60085-78-1  |      | C <sub>19</sub> H <sub>18</sub> ClNO                                            |
| Clopirac             | Antiinflammatory      | 42779-82-8  |      | C <sub>14</sub> H <sub>14</sub> ClNO <sub>2</sub>                               |
| Cloponone            | Respiratory Stimulant | 85409-44-5  |      | C <sub>11</sub> H <sub>9</sub> Cl <sub>4</sub> NO <sub>2</sub>                  |
| Cloprednol           | Glucocorticoid        | 5251-34-3   | Y    | C <sub>21</sub> H <sub>25</sub> ClO <sub>5</sub>                                |
| Cloprostenoл         | Prostaglandin         | 40665-92-7  |      | C <sub>22</sub> H <sub>29</sub> ClO <sub>6</sub>                                |
| Cloprothiazole       | Antibiotic            | 6469-36-9   |      | C <sub>7</sub> H <sub>10</sub> ClNS                                             |
| Cloquinozine         | Diuretic              | 5220-68-8   |      | C <sub>16</sub> H <sub>22</sub> ClN                                             |
| Cloracetadol         | Analgesic             | 15687-05-5  |      | C <sub>10</sub> H <sub>10</sub> Cl <sub>3</sub> NO <sub>3</sub>                 |
| Cloranolol           | Antiarrhythmic        | 39563-28-5  |      | C <sub>13</sub> H <sub>19</sub> Cl <sub>2</sub> NO <sub>2</sub>                 |
| Clorazepate          | Anxiolytic            | 23887-31-2  | Y    | C <sub>16</sub> H <sub>11</sub> ClN <sub>2</sub> O <sub>3</sub>                 |
| Clorethate           | Sedative              | 5634-37-7   |      | C <sub>5</sub> H <sub>4</sub> Cl <sub>6</sub> O <sub>3</sub>                    |
| Clorexolone          | Diuretic              | 2127-01-7   |      | C <sub>14</sub> H <sub>17</sub> ClN <sub>2</sub> O <sub>3</sub> S               |
| Clorgiline           | Antidepressant        | 17780-72-2  |      | C <sub>13</sub> H <sub>15</sub> Cl <sub>2</sub> NO                              |
| Cloricromen          | Antithrombotic        | 68206-94-0  |      | C <sub>20</sub> H <sub>26</sub> ClNO <sub>5</sub>                               |



Table S1. Cont.

| Common Name            | Indication                | CAS Number  | Oral | Molecular Formula                                                                            |
|------------------------|---------------------------|-------------|------|----------------------------------------------------------------------------------------------|
| Cloridarol             | Vasodilator               | 3611-72-1   |      | C <sub>15</sub> H <sub>11</sub> ClO <sub>2</sub>                                             |
| Clorindanic Acid       | Antibiotic                | 153-43-5    |      | C <sub>10</sub> H <sub>9</sub> ClO <sub>3</sub>                                              |
| Clorindione            | Anticonvulsant            | 1146-99-2   |      | C <sub>15</sub> H <sub>9</sub> ClO <sub>2</sub>                                              |
| Clormecaine            | Analgesic                 | 13930-34-2  |      | C <sub>11</sub> H <sub>15</sub> ClN <sub>2</sub> O <sub>2</sub>                              |
| Cloroperone            | Antipsychotic             | 61764-61-2  |      | C <sub>22</sub> H <sub>23</sub> ClFNO <sub>2</sub>                                           |
| Cloroqualone           | Sedative                  | 25509-07-3  |      | C <sub>16</sub> H <sub>12</sub> Cl <sub>2</sub> N <sub>2</sub> O                             |
| Clorotepine            | Antipsychotic             | 13448-22-1  |      | C <sub>19</sub> H <sub>21</sub> ClN <sub>2</sub> S                                           |
| Clorprenaline          | Bronchodilator            | 3811-25-4   |      | C <sub>11</sub> H <sub>16</sub> ClNO                                                         |
| Clorsulon              | Anthelmintic              | 60200-06-8  |      | C <sub>8</sub> H <sub>8</sub> Cl <sub>3</sub> N <sub>3</sub> O <sub>4</sub> S <sub>2</sub>   |
| Clortermine            | Anorexic                  | 10389-73-8  |      | C <sub>10</sub> H <sub>14</sub> ClN                                                          |
| Closantel              | Anthelmintic              | 57808-65-8  |      | C <sub>22</sub> H <sub>14</sub> Cl <sub>2</sub> I <sub>2</sub> N <sub>2</sub> O <sub>2</sub> |
| Closiramine Aceturate  | Antihistaminic            | 47135-88-6  |      | C <sub>18</sub> H <sub>21</sub> ClN <sub>2</sub>                                             |
| Clostebol              | Steroid                   | 1093-58-9   |      | C <sub>19</sub> H <sub>27</sub> ClO <sub>2</sub>                                             |
| Clothiapine            | Antipsychotic             | 2058-52-8   |      | C <sub>18</sub> H <sub>18</sub> ClN <sub>3</sub> S                                           |
| Clothixamide Maleate   | Antipsychotic             | 4177-58-6   |      | C <sub>24</sub> H <sub>28</sub> ClN <sub>3</sub> OS                                          |
| Clotiazepam            | Anxiolytic                | 33671-46-4  | Y    | C <sub>16</sub> H <sub>15</sub> ClN <sub>2</sub> OS                                          |
| Cloticasone Propionate | Antiinflammatory          | 80486-69-7  |      | C <sub>25</sub> H <sub>31</sub> ClF <sub>2</sub> O <sub>5</sub> S                            |
| Clotioxone             | Analgesic                 | 1856-34-4   |      | C <sub>9</sub> H <sub>5</sub> Cl <sub>3</sub> N <sub>2</sub> O <sub>2</sub> S                |
| Clotrimazole           | Antifungal                | 23593-75-1  | Y    | C <sub>22</sub> H <sub>17</sub> ClN <sub>2</sub>                                             |
| Clovoxamine            | Antidepressant            | 54739-19-4  |      | C <sub>14</sub> H <sub>21</sub> ClN <sub>2</sub> O <sub>2</sub>                              |
| Cloxacepride           | Antihistaminic            | 65569-29-1  |      | C <sub>22</sub> H <sub>27</sub> Cl <sub>2</sub> N <sub>3</sub> O <sub>4</sub>                |
| Cloxacillin            | Antibiotic                | 61-72-3     | Y    | C <sub>19</sub> H <sub>18</sub> ClN <sub>3</sub> O <sub>5</sub> S                            |
| Cloxazolam             | Anxiolytic                | 24166-13-0  |      | C <sub>17</sub> H <sub>14</sub> Cl <sub>2</sub> N <sub>2</sub> O <sub>2</sub>                |
| Cloxestradiol          | Estrogen                  | 54063-33-1  |      | C <sub>20</sub> H <sub>25</sub> Cl <sub>3</sub> O <sub>3</sub>                               |
| Cloximate              | Antiinflammatory          | 58832-68-1  |      | C <sub>14</sub> H <sub>19</sub> ClN <sub>2</sub> O <sub>3</sub>                              |
| Cloxtotestosterone     | Androgen                  | 53608-96-1  |      | C <sub>21</sub> H <sub>29</sub> Cl <sub>3</sub> O <sub>3</sub>                               |
| Cloxypendyl            | Antipsychotic             | 15311-77-0  |      | C <sub>20</sub> H <sub>25</sub> ClN <sub>4</sub> OS                                          |
| Cloxyquin              | Antibacterial             | 130-16-5    |      | C <sub>9</sub> H <sub>6</sub> ClNO                                                           |
| Clozapine              | Antipsychotic             | 5786-21-0   | Y    | C <sub>18</sub> H <sub>19</sub> ClN <sub>4</sub>                                             |
| Cocaine                | Anesthetic                | 50-36-2     |      | C <sub>17</sub> H <sub>21</sub> NO <sub>4</sub>                                              |
| Codeine                | Antitussive               | 76-57-3     | Y    | C <sub>18</sub> H <sub>21</sub> NO <sub>3</sub>                                              |
| Codoxime               | Antitussive               | 7125-76-0   |      | C <sub>20</sub> H <sub>24</sub> N <sub>2</sub> O <sub>5</sub>                                |
| Co Fluampicil          | Antibiotic                | 5250-39-5   |      | C <sub>19</sub> H <sub>17</sub> ClFN <sub>3</sub> O <sub>5</sub> S                           |
| Cogazocine             | Analgesic                 | 57653-29-9  |      | C <sub>21</sub> H <sub>32</sub> NO                                                           |
| Colchicine             | Anticholelithogenic       | 64-86-8     | Y    | C <sub>22</sub> H <sub>25</sub> NO <sub>6</sub>                                              |
| Colestolone            | Antihyperlipidemic        | 50673-97-7  |      | C <sub>27</sub> H <sub>44</sub> O <sub>2</sub>                                               |
| Colfenamate            | Antiinflammatory          | 30531-86-3  |      | C <sub>16</sub> H <sub>13</sub> F <sub>3</sub> N <sub>2</sub> O <sub>3</sub>                 |
| Colforsin              | Bronchodilator            | 66575-29-9  |      | C <sub>22</sub> H <sub>34</sub> O <sub>7</sub>                                               |
| Colfosceril Palmitate  | Respiratory Stimulant     | 63-89-8     |      | C <sub>40</sub> H <sub>80</sub> NO <sub>8</sub> P                                            |
| Colterol Mesylate      | Bronchodilator            | 18866-78-9  |      | C <sub>12</sub> H <sub>19</sub> NO <sub>3</sub>                                              |
| Coluracetam            | Nootropic                 | 135463-81-9 |      | C <sub>19</sub> H <sub>23</sub> N <sub>3</sub> O <sub>3</sub>                                |
| Conessine Hydrobromide | Analgesic                 | 546-06-5    |      | C <sub>24</sub> H <sub>40</sub> N <sub>2</sub>                                               |
| Conivaptan             | Cardiotonic               | 210101-16-9 |      | C <sub>32</sub> H <sub>26</sub> N <sub>4</sub> O <sub>2</sub>                                |
| Conorphone             | Analgesic                 | 72060-05-0  |      | C <sub>23</sub> H <sub>29</sub> NO <sub>3</sub>                                              |
| Cormethasone Acetate   | Antiinflammatory          | 35135-67-2  |      | C <sub>24</sub> H <sub>29</sub> F <sub>3</sub> O <sub>6</sub>                                |
| Cortisone Acetate      | Glucocorticoid            | 50-04-4     |      | C <sub>23</sub> H <sub>30</sub> O <sub>6</sub>                                               |
| Cortisuzol             | Glucocorticoid            | 50801-44-0  |      | C <sub>37</sub> H <sub>40</sub> N <sub>2</sub> O <sub>8</sub> S                              |
| Cortivazol             | Glucocorticoid            | 1110-40-3   |      | C <sub>32</sub> H <sub>38</sub> N <sub>2</sub> O <sub>5</sub>                                |
| Cortodoxone            | Antiinflammatory          | 152-58-9    |      | C <sub>21</sub> H <sub>30</sub> O <sub>4</sub>                                               |
| Cotarnine Chloride     | Hemostatic                | 10018-19-6  |      | C <sub>12</sub> H <sub>14</sub> NO <sub>3</sub> .Cl                                          |
| Cotinine               | Antidepressant            | 486-56-6    |      | C <sub>10</sub> H <sub>12</sub> N <sub>2</sub> O                                             |
| Cotriptyline           | Antidepressant            | 34662-67-4  |      | C <sub>21</sub> H <sub>20</sub> NO                                                           |
| Coumaphos              | Antineoplastic            | 56-72-4     |      | C <sub>14</sub> H <sub>16</sub> ClO <sub>5</sub> PS                                          |
| Coumarin               | Anticoagulant             | 91-64-5     |      | C <sub>9</sub> H <sub>6</sub> O <sub>2</sub>                                                 |
| Coumazoline            | Anticholelithogenic       | 37681-00-8  |      | C <sub>14</sub> H <sub>16</sub> N <sub>2</sub> O                                             |
| Coumetarol             | Anticoagulant             | 4366-18-1   |      | C <sub>21</sub> H <sub>16</sub> O <sub>7</sub>                                               |
| Creatinolfosfate       | Bone Resorption Inhibitor | 6903-79-3   |      | C <sub>4</sub> H <sub>12</sub> N <sub>3</sub> O <sub>4</sub> P                               |
| Crilvastatin           | Antihyperlipidemic        | 120551-59-9 |      | C <sub>14</sub> H <sub>23</sub> NO <sub>3</sub>                                              |
| Crisnatol Mesylate     | Antineoplastic            | 96389-68-3  |      | C <sub>23</sub> H <sub>23</sub> NO <sub>2</sub>                                              |
| Crobenetine            | Analgesic                 | 221019-25-6 |      | C <sub>25</sub> H <sub>33</sub> NO <sub>2</sub>                                              |
| Croconazole            | Antifungal                | 77175-51-0  |      | C <sub>18</sub> H <sub>15</sub> ClN <sub>2</sub> O                                           |
| Cromakalim             | Antihypertensive          | 94470-67-4  |      | C <sub>16</sub> H <sub>18</sub> N <sub>2</sub> O <sub>3</sub>                                |
| Cromitrile Sodium      | Bronchodilator            | 53736-51-9  |      | C <sub>20</sub> H <sub>15</sub> N <sub>5</sub> O <sub>5</sub>                                |

Table S1. Cont.

| Common Name               | Indication       | CAS Number  | Oral | Molecular Formula                                                              |
|---------------------------|------------------|-------------|------|--------------------------------------------------------------------------------|
| Cromoglicate Lisetil      | Bronchodilator   | 110816-79-0 |      | C <sub>33</sub> H <sub>36</sub> N <sub>2</sub> O <sub>12</sub>                 |
| Cromolyn                  | Bronchodilator   | 16110-51-3  | Y    | C <sub>23</sub> H <sub>16</sub> O <sub>11</sub>                                |
| Cronidipine               | Antihypertensive | 113759-50-5 |      | C <sub>30</sub> H <sub>32</sub> ClN <sub>3</sub> O <sub>8</sub>                |
| Cropropamide              | Analgesic        | 633-47-6    |      | C <sub>13</sub> H <sub>24</sub> N <sub>2</sub> O <sub>2</sub>                  |
| Crotamiton                | Dermatologic     | 483-63-6    |      | C <sub>13</sub> H <sub>17</sub> NO                                             |
| Crotetamide               | Analgesic        | 6168-76-9   |      | C <sub>12</sub> H <sub>22</sub> N <sub>2</sub> O <sub>2</sub>                  |
| Crotoniazide              | Antibiotic       | 7007-96-7   |      | C <sub>10</sub> H <sub>11</sub> N <sub>3</sub> O                               |
| Crotoxyfos                | Antineoplastic   | 7700-17-6   |      | C <sub>14</sub> H <sub>19</sub> O <sub>6</sub> P                               |
| Crufomate                 | Anthelminthic    | 299-86-5    |      | C <sub>12</sub> H <sub>19</sub> ClNO <sub>3</sub> P                            |
| Cyacetacide               | Antibacterial    | 140-87-4    |      | C <sub>3</sub> H <sub>5</sub> N <sub>3</sub> O                                 |
| Cyamemazine               | Antipsychotic    | 3546-03-0   | Y    | C <sub>19</sub> H <sub>21</sub> N <sub>3</sub> S                               |
| Cyclacillin               | Antibiotic       | 3485-14-1   |      | C <sub>15</sub> H <sub>23</sub> N <sub>3</sub> O <sub>4</sub> S                |
| Cyclandelate              | Vasodilator      | 456-59-7    | Y    | C <sub>17</sub> H <sub>24</sub> O <sub>3</sub>                                 |
| Cyclarbamate              | Anxiolytic       | 5779-54-4   |      | C <sub>21</sub> H <sub>24</sub> N <sub>2</sub> O <sub>4</sub>                  |
| Cyclazocine               | Antidote         | 3572-80-3   |      | C <sub>18</sub> H <sub>25</sub> NO                                             |
| Cyclazodone               | Antidepressant   | 14461-91-7  |      | C <sub>12</sub> H <sub>12</sub> N <sub>2</sub> O <sub>2</sub>                  |
| Cyclexanone               | Antitussive      | 15301-52-7  |      | C <sub>16</sub> H <sub>25</sub> NO <sub>2</sub>                                |
| Cyclindole                | Antidepressant   | 32211-97-5  |      | C <sub>14</sub> H <sub>18</sub> N <sub>2</sub>                                 |
| Cycliramine Maleate       | Antihistaminic   | 47128-12-1  |      | C <sub>18</sub> H <sub>19</sub> ClN <sub>2</sub>                               |
| Cyclizine                 | Antiemetic       | 82-92-8     |      | C <sub>18</sub> H <sub>22</sub> N <sub>2</sub>                                 |
| Cyclobarbitol             | Sedative         | 52-31-3     |      | C <sub>12</sub> H <sub>16</sub> N <sub>2</sub> O <sub>3</sub>                  |
| Cyclobendazole            | Anthelminthic    | 31431-43-3  |      | C <sub>13</sub> H <sub>13</sub> N <sub>3</sub> O <sub>3</sub>                  |
| Cyclobenzaprine           | Muscle Relaxant  | 303-53-7    | Y    | C <sub>20</sub> H <sub>21</sub> N                                              |
| Cyclobutyrol              | Choleretic       | 512-16-3    |      | C <sub>10</sub> H <sub>18</sub> O <sub>3</sub>                                 |
| Cyclocumarol              | Anticoagulant    | 518-20-7    |      | C <sub>20</sub> H <sub>18</sub> O <sub>4</sub>                                 |
| Cyclofenil                | Androgen         | 2624-43-3   |      | C <sub>23</sub> H <sub>24</sub> O <sub>4</sub>                                 |
| Cycloguanil Pamoate       | Antimalarial     | 516-21-2    |      | C <sub>11</sub> H <sub>14</sub> ClN <sub>5</sub>                               |
| Cycloheximide             | Antineoplastic   | 66-81-9     |      | C <sub>15</sub> H <sub>23</sub> NO <sub>4</sub>                                |
| Cyclomenol                | Antiarrhythmic   | 5591-47-9   |      | C <sub>14</sub> H <sub>20</sub> O                                              |
| Cyclomethycaine Sulfate   | Analgesic        | 139-62-8    |      | C <sub>22</sub> H <sub>33</sub> NO <sub>3</sub>                                |
| Cyclopentamine            | Decongestant     | 102-45-4    |      | C <sub>9</sub> H <sub>19</sub> N                                               |
| Cyclopenthiiazide         | Antihypertensive | 742-20-1    | Y    | C <sub>13</sub> H <sub>18</sub> ClN <sub>3</sub> O <sub>4</sub> S <sub>2</sub> |
| Cyclopentobarbital sodium | Sedative         | 76-68-6     |      | C <sub>12</sub> H <sub>14</sub> N <sub>2</sub> O <sub>3</sub>                  |
| Cyclopentolate            | Mydriatic        | 512-15-2    |      | C <sub>17</sub> H <sub>25</sub> NO <sub>3</sub>                                |
| Cyclophenazine            | Antipsychotic    | 17692-26-1  |      | C <sub>23</sub> H <sub>26</sub> F <sub>3</sub> N <sub>3</sub> S                |
| Cyclophosphamide          | Antineoplastic   | 50-18-0     |      | C <sub>7</sub> H <sub>15</sub> Cl <sub>2</sub> N <sub>2</sub> O <sub>2</sub> P |
| Cyclopregnol              | Progestogen      | 465-53-2    |      | C <sub>21</sub> H <sub>32</sub> O <sub>2</sub>                                 |
| Cyclopropane              | Anesthetic       | 75-19-4     |      | C <sub>3</sub> H <sub>6</sub>                                                  |
| Cycloserine               | Antibacterial    | 68-41-7     | Y    | C <sub>3</sub> H <sub>6</sub> N <sub>2</sub> O <sub>2</sub>                    |
| Cyclothiazide             | Diuretic         | 2259-96-3   |      | C <sub>14</sub> H <sub>16</sub> ClN <sub>3</sub> O <sub>4</sub> S <sub>2</sub> |
| Cyclovalone               | Choleretic       | 579-23-7    |      | C <sub>22</sub> H <sub>22</sub> O <sub>5</sub>                                 |
| Cycrimine                 | Antispasmodic    | 77-39-4     |      | C <sub>19</sub> H <sub>29</sub> NO                                             |
| Cyheptamide               | Anticonvulsant   | 7199-29-3   |      | C <sub>16</sub> H <sub>15</sub> NO                                             |
| Cyheptropine              | Antihypotensive  | 602-40-4    |      | C <sub>24</sub> H <sub>27</sub> NO <sub>2</sub>                                |
| Cynarine                  | Choleretic       | 30964-13-7  |      | C <sub>25</sub> H <sub>24</sub> O <sub>12</sub>                                |
| Cypenammine               | Antidepressant   | 15301-54-9  |      | C <sub>11</sub> H <sub>15</sub> N                                              |
| Cyprazepam                | Sedative         | 15687-07-7  |      | C <sub>19</sub> H <sub>18</sub> ClN <sub>3</sub> O                             |
| Cyprenorphine             | Analgesic        | 4406-22-8   |      | C <sub>26</sub> H <sub>33</sub> NO <sub>4</sub>                                |
| Cyprodenate               | Antipsychotic    | 15585-86-1  |      | C <sub>13</sub> H <sub>25</sub> NO <sub>2</sub>                                |
| Cyproheptadine            | Antihistaminic   | 129-03-3    | Y    | C <sub>21</sub> H <sub>21</sub> N                                              |
| Cyprolidol                | Antidepressant   | 4904-00-1   |      | C <sub>21</sub> H <sub>19</sub> NO                                             |
| Cyproquinat               | Antibacterial    | 19485-08-6  |      | C <sub>20</sub> H <sub>23</sub> NO <sub>5</sub>                                |
| Cyproterone Acetate       | Antineoplastic   | 427-51-0    | Y    | C <sub>24</sub> H <sub>29</sub> ClO <sub>4</sub>                               |
| Cyproximide               | Antipsychotic    | 66537-94-8  |      | C <sub>11</sub> H <sub>8</sub> ClNO <sub>2</sub>                               |
| Cyromazine                | Antihistaminic   | 66215-27-8  |      | C <sub>6</sub> H <sub>10</sub> N <sub>6</sub>                                  |
| Cysteamine                | Antidote         | 60-23-1     | Y    | C <sub>2</sub> H <sub>7</sub> NS                                               |
| Cytarabine                | Antineoplastic   | 147-94-4    |      | C <sub>9</sub> H <sub>13</sub> N <sub>5</sub> O <sub>5</sub>                   |
| Cyverine                  | Antispasmodic    | 4432-75-1   |      | C <sub>17</sub> H <sub>33</sub> N                                              |
| Dabelotine                | Nootropic        | 118976-38-8 |      | C <sub>15</sub> H <sub>22</sub> N <sub>2</sub> O <sub>2</sub>                  |
| Dabigatran                | Antithrombotic   | 211914-51-1 | Y    | C <sub>25</sub> H <sub>25</sub> N <sub>7</sub> O <sub>3</sub>                  |
| Dabigatran Etxilate       | Antithrombotic   | 211915-06-9 | Y    | C <sub>34</sub> H <sub>41</sub> N <sub>7</sub> O <sub>5</sub>                  |
| Dabuzalgron               | Antispasmodic    | 219311-44-1 |      | C <sub>12</sub> H <sub>16</sub> ClN <sub>3</sub> O <sub>3</sub> S              |
| Dacarbazine               | Antineoplastic   | 4342-03-4   |      | C <sub>6</sub> H <sub>10</sub> N <sub>6</sub> O                                |

Table S1. Cont.

| Common Name           | Indication           | CAS Number  | Oral | Molecular Formula                                                              |
|-----------------------|----------------------|-------------|------|--------------------------------------------------------------------------------|
| Dacemazine            | Antihistaminic       | 518-61-6    |      | C <sub>16</sub> H <sub>16</sub> N <sub>2</sub> O <sub>5</sub>                  |
| Dacinostat            | Antineoplastic       | 404951-53-7 |      | C <sub>22</sub> H <sub>25</sub> N <sub>3</sub> O <sub>3</sub>                  |
| Dacisteine            | Unclassified         | 18725-37-6  |      | C <sub>7</sub> H <sub>11</sub> NO <sub>4</sub> S                               |
| Dacopafant            | Antithrombotic       | 125372-33-0 |      | C <sub>12</sub> H <sub>11</sub> N <sub>3</sub> O <sub>5</sub>                  |
| Dacuronium Bromide    | Muscle Relaxant      | 27115-86-2  |      | C <sub>33</sub> H <sub>58</sub> N <sub>2</sub> O <sub>3</sub> Br <sub>2</sub>  |
| Dagapamil             | Vasodilator          | 85247-76-3  |      | C <sub>36</sub> H <sub>56</sub> N <sub>2</sub> O <sub>4</sub>                  |
| Daglutril             | Antihypertensive     | 182821-27-8 |      | C <sub>31</sub> H <sub>38</sub> N <sub>2</sub> O <sub>6</sub>                  |
| Dalbraminol           | Cardiotonic          | 81528-80-5  |      | C <sub>17</sub> H <sub>26</sub> N <sub>4</sub> O <sub>2</sub>                  |
| Dalcotidine           | Antiulcerative       | 120958-90-9 |      | C <sub>18</sub> H <sub>29</sub> N <sub>3</sub> O <sub>2</sub>                  |
| Daledalin Tosylate    | Antidepressant       | 22136-27-2  |      | C <sub>19</sub> H <sub>24</sub> N <sub>2</sub>                                 |
| Dalfopristin          | Antibacterial        | 112362-50-2 |      | C <sub>34</sub> H <sub>50</sub> N <sub>4</sub> O <sub>9</sub> S                |
| Daltroban             | Immunosuppressant    | 79094-20-5  |      | C <sub>16</sub> H <sub>16</sub> ClNO <sub>4</sub> S                            |
| Dalvastatin           | Antihyperlipidemic   | 132100-55-1 |      | C <sub>24</sub> H <sub>31</sub> FO <sub>3</sub>                                |
| Dametralast           | Vasodilator          | 71680-63-2  |      | C <sub>6</sub> H <sub>8</sub> N <sub>6</sub>                                   |
| Damotepine            | Antipsychotic        | 1469-07-4   |      | C <sub>17</sub> H <sub>17</sub> NS                                             |
| Danazol               | Steroid              | 17230-88-5  | Y    | C <sub>22</sub> H <sub>27</sub> NO <sub>2</sub>                                |
| Daniquidone           | Antineoplastic       | 67199-66-0  |      | C <sub>15</sub> H <sub>11</sub> N <sub>3</sub> O                               |
| Danitracen            | Antidepressant       | 31232-26-5  |      | C <sub>20</sub> H <sub>21</sub> NO                                             |
| Danofloxacin Mesylate | Antibacterial        | 112398-08-0 |      | C <sub>19</sub> H <sub>20</sub> FN <sub>3</sub> O <sub>3</sub>                 |
| Danosteine            | Antitussive          | 4938-00-5   |      | C <sub>5</sub> H <sub>8</sub> O <sub>4</sub> S                                 |
| Danthron              | Laxative             | 117-10-2    |      | C <sub>14</sub> H <sub>8</sub> O <sub>4</sub>                                  |
| Dantrolene            | Muscle Relaxant      | 7261-97-4   | Y    | C <sub>14</sub> H <sub>10</sub> N <sub>4</sub> O <sub>5</sub>                  |
| Dapabutan             | Unclassified         | 6582-31-6   |      | C <sub>19</sub> H <sub>40</sub> N <sub>2</sub> O <sub>2</sub>                  |
| Dapiprazole           | Antiglaucoma         | 72822-12-9  |      | C <sub>19</sub> H <sub>27</sub> N <sub>5</sub>                                 |
| Dapitant              | Antiemetic           | 153438-49-4 |      | C <sub>37</sub> H <sub>39</sub> NO <sub>4</sub>                                |
| Dapivirine            | Antiviral            | 244767-67-7 |      | C <sub>20</sub> H <sub>19</sub> N <sub>5</sub>                                 |
| Dapoxetine            | Antidepressant       | 119356-77-3 | Y    | C <sub>21</sub> H <sub>23</sub> NO                                             |
| Dapsone               | Antibiotic           | 80-08-0     | Y    | C <sub>12</sub> H <sub>12</sub> N <sub>2</sub> O <sub>2</sub> S                |
| Darapladib            | Antihyperlipidemic   | 356057-34-6 | Y    | C <sub>36</sub> H <sub>38</sub> F <sub>4</sub> N <sub>4</sub> O <sub>2</sub> S |
| Darbufelone           | Antiinflammatory     | 139226-28-1 |      | C <sub>18</sub> H <sub>24</sub> N <sub>2</sub> O <sub>2</sub> S                |
| Darenzepine           | Antiulcerative       | 84629-61-8  |      | C <sub>21</sub> H <sub>21</sub> N <sub>3</sub> O <sub>2</sub>                  |
| Darglitazone Sodium   | Antidiabetic         | 141200-24-0 |      | C <sub>23</sub> H <sub>20</sub> N <sub>2</sub> O <sub>4</sub> S                |
| Darifenacin           | Antispasmodic        | 133099-04-4 | Y    | C <sub>28</sub> H <sub>30</sub> N <sub>2</sub> O <sub>2</sub>                  |
| Darodipine            | Antihypertensive     | 72803-02-2  |      | C <sub>19</sub> H <sub>21</sub> N <sub>3</sub> O <sub>5</sub>                  |
| Darsidomine           | Vasodilator          | 137500-42-6 |      | C <sub>9</sub> H <sub>16</sub> N <sub>4</sub> O                                |
| Darunavir             | Antiviral            | 206361-99-1 | Y    | C <sub>27</sub> H <sub>37</sub> N <sub>3</sub> O <sub>7</sub> S                |
| Darusentan            | Anesthetic           | 171714-84-4 |      | C <sub>22</sub> H <sub>22</sub> N <sub>2</sub> O <sub>6</sub>                  |
| Dasantafil            | Erectile Dysfunction | 569351-91-3 |      | C <sub>22</sub> H <sub>28</sub> BrN <sub>5</sub> O <sub>5</sub>                |
| Dasatinib             | Antineoplastic       | 302962-49-8 | Y    | C <sub>22</sub> H <sub>26</sub> ClN <sub>7</sub> O <sub>2</sub> S              |
| Datelliptium Chloride | Antineoplastic       | 105118-14-7 |      | C <sub>23</sub> H <sub>28</sub> N <sub>3</sub> O.Cl                            |
| Daunorubicin          | Antineoplastic       | 20830-81-3  |      | C <sub>27</sub> H <sub>29</sub> NO <sub>10</sub>                               |
| Davasaicin            | Analgesic            | 147497-64-1 |      | C <sub>22</sub> H <sub>30</sub> N <sub>2</sub> O <sub>3</sub>                  |
| Daxalipram            | Antidepressant       | 189940-24-7 |      | C <sub>14</sub> H <sub>19</sub> NO <sub>4</sub>                                |
| Dazadrol Maleate      | Antidepressant       | 47029-84-5  |      | C <sub>15</sub> H <sub>14</sub> ClN <sub>3</sub> O                             |
| Dazepinil             | Antidepressant       | 75991-50-3  |      | C <sub>17</sub> H <sub>18</sub> N <sub>2</sub>                                 |
| Dazidamine            | Antineoplastic       | 75522-73-5  |      | C <sub>19</sub> H <sub>23</sub> N <sub>3</sub> S                               |
| Dazmegrel             | Anticoagulant        | 76894-77-4  |      | C <sub>16</sub> H <sub>17</sub> N <sub>3</sub> O <sub>2</sub>                  |
| Dazolicine            | Antiarrhythmic       | 61477-97-2  |      | C <sub>17</sub> H <sub>24</sub> ClN <sub>3</sub> S                             |
| Dazopride Fumarate    | Gastroprokinetic     | 70181-03-2  |      | C <sub>15</sub> H <sub>23</sub> ClN <sub>4</sub> O <sub>2</sub>                |
| Dazoquinast           | Bronchodilator       | 76002-75-0  |      | C <sub>11</sub> H <sub>7</sub> N <sub>3</sub> O <sub>2</sub>                   |
| Dazoxiben             | Antithrombotic       | 78218-09-4  |      | C <sub>12</sub> H <sub>12</sub> N <sub>2</sub> O <sub>3</sub>                  |
| Deanol Aceglumate     | Nootropic            | 1188-37-0   |      | C <sub>7</sub> H <sub>11</sub> NO <sub>5</sub>                                 |
| Deboxamet             | Antiulcerative       | 34024-41-4  |      | C <sub>12</sub> H <sub>14</sub> N <sub>2</sub> O <sub>3</sub>                  |
| Debrisoquin Sulfate   | Antihypertensive     | 1131-64-2   |      | C <sub>10</sub> H <sub>13</sub> N <sub>3</sub>                                 |
| Debropol              | Unclassified         | 24403-04-1  |      | C <sub>3</sub> H <sub>6</sub> BrNO <sub>3</sub>                                |
| Decamethonium Bromide | Muscle Relaxant      | 541-22-0    |      | C <sub>16</sub> H <sub>38</sub> Br <sub>2</sub> N <sub>2</sub>                 |
| Decimemide            | Anticonvulsant       | 14817-09-5  |      | C <sub>19</sub> H <sub>31</sub> NO <sub>4</sub>                                |
| Decitabine            | Antineoplastic       | 2353-33-5   |      | C <sub>8</sub> H <sub>12</sub> N <sub>4</sub> O <sub>4</sub>                   |
| Decitropine           | Antihypotensive      | 1242-69-9   |      | C <sub>23</sub> H <sub>25</sub> NO                                             |
| Declenperone          | Sedative             | 63388-37-4  |      | C <sub>22</sub> H <sub>24</sub> FN <sub>3</sub> O <sub>2</sub>                 |
| Declopramide          | Antiemetic           | 891-60-1    |      | C <sub>13</sub> H <sub>20</sub> ClN <sub>3</sub> O                             |
| Decloxizine           | Sedative             | 3733-63-9   |      | C <sub>21</sub> H <sub>28</sub> N <sub>2</sub> O <sub>2</sub>                  |
| Decominol             | Antihypotensive      | 60812-35-3  |      | C <sub>13</sub> H <sub>29</sub> NO <sub>2</sub>                                |

Table S1. Cont.

| Common Name           | Indication           | CAS Number  | Oral | Molecular Formula                                                              |
|-----------------------|----------------------|-------------|------|--------------------------------------------------------------------------------|
| Decoquinat            | Antibacterial        | 18507-89-6  |      | C <sub>24</sub> H <sub>35</sub> NO <sub>5</sub>                                |
| Dectaflur             | Antibacterial        | 36505-83-6  |      | C <sub>18</sub> H <sub>37</sub> N.FH                                           |
| Deditonium Bromide    | Antispasmodic        | 2401-56-1   |      | C <sub>38</sub> H <sub>66</sub> Br <sub>2</sub> N <sub>2</sub> O <sub>2</sub>  |
| Deferasirox           | Antidote             | 201530-41-8 | Y    | C <sub>21</sub> H <sub>15</sub> N <sub>3</sub> O <sub>4</sub>                  |
| Deferiprone           | Antidote             | 30652-11-0  | Y    | C <sub>7</sub> H <sub>9</sub> NO <sub>2</sub>                                  |
| Deferitritin          | Antidote             | 239101-33-8 |      | C <sub>11</sub> H <sub>11</sub> NO <sub>4</sub> S                              |
| Deferoxamine Mesylate | Antidote             | 70-51-9     |      | C <sub>25</sub> H <sub>48</sub> N <sub>6</sub> O <sub>8</sub>                  |
| Deflazacort           | Antiinflammatory     | 14484-47-0  | Y    | C <sub>25</sub> H <sub>31</sub> NO <sub>6</sub>                                |
| Defosfamide           | Antineoplastic       | 3733-81-1   |      | C <sub>9</sub> H <sub>20</sub> Cl <sub>3</sub> N <sub>2</sub> O <sub>5</sub> P |
| Dehydrocholic Acid    | Choleretic           | 81-23-2     |      | C <sub>24</sub> H <sub>34</sub> O <sub>5</sub>                                 |
| Dehydroemetine        | Antiamoebic          | 4914-30-1   |      | C <sub>29</sub> H <sub>38</sub> N <sub>2</sub> O <sub>4</sub>                  |
| Delanterone           | Antineoplastic       | 63014-96-0  |      | C <sub>20</sub> H <sub>28</sub> O                                              |
| Delapril              | Antihypertensive     | 83435-66-9  | Y    | C <sub>26</sub> H <sub>32</sub> N <sub>2</sub> O <sub>5</sub>                  |
| Delavirdine           | Antiviral            | 136817-59-9 | Y    | C <sub>22</sub> H <sub>28</sub> N <sub>6</sub> O <sub>3</sub> S                |
| Delequamine           | Erectile Dysfunction | 119905-05-4 |      | C <sub>18</sub> H <sub>26</sub> N <sub>2</sub> O <sub>3</sub> S                |
| Delergotril           | Antibiotic           | 59091-65-5  |      | C <sub>17</sub> H <sub>19</sub> N <sub>3</sub>                                 |
| Delfantrine           | Antimalarial         | 3436-11-1   |      | C <sub>14</sub> H <sub>22</sub> N <sub>4</sub> O <sub>3</sub> S                |
| Delfaprazine          | Antipsychotic        | 117827-81-3 |      | C <sub>18</sub> H <sub>22</sub> N <sub>2</sub>                                 |
| Delmadinone Acetate   | Progestogen          | 13698-49-2  |      | C <sub>23</sub> H <sub>27</sub> ClO <sub>4</sub>                               |
| Delmetacin            | Antiinflammatory     | 16401-80-2  |      | C <sub>18</sub> H <sub>15</sub> NO <sub>3</sub>                                |
| Delmopinol            | Antibiotic           | 79874-76-3  | Y    | C <sub>16</sub> H <sub>33</sub> NO <sub>2</sub>                                |
| Delorazepam           | Sedative             | 2894-67-9   |      | C <sub>15</sub> H <sub>10</sub> Cl <sub>2</sub> N <sub>2</sub> O               |
| Deloxolone            | Dermatologic         | 68635-50-7  |      | C <sub>34</sub> H <sub>52</sub> O <sub>6</sub>                                 |
| Delprostenate         | Prostaglandin        | 62524-99-6  |      | C <sub>23</sub> H <sub>29</sub> ClO <sub>6</sub>                               |
| Delucemine            | Nootropic            | 186495-49-8 |      | C <sub>16</sub> H <sub>17</sub> F <sub>2</sub> N                               |
| Dembrexine            | Antidepressant       | 83200-09-3  |      | C <sub>13</sub> H <sub>17</sub> Br <sub>2</sub> NO <sub>2</sub>                |
| Demecarium Bromide    | Cholinergic          | 56-94-0     |      | C <sub>32</sub> H <sub>52</sub> Br <sub>2</sub> N <sub>4</sub> O <sub>4</sub>  |
| Demeclocycline        | Antibiotic           | 127-33-3    | Y    | C <sub>21</sub> H <sub>21</sub> ClN <sub>2</sub> O <sub>8</sub>                |
| Demecolcine           | Antineoplastic       | 477-30-5    |      | C <sub>21</sub> H <sub>25</sub> NO <sub>5</sub>                                |
| Demecycline           | Antibacterial        | 987-02-0    |      | C <sub>21</sub> H <sub>22</sub> N <sub>2</sub> O <sub>8</sub>                  |
| Demegestone           | Progestogen          | 10116-22-0  |      | C <sub>21</sub> H <sub>28</sub> O <sub>2</sub>                                 |
| Demelverine           | Antispasmodic        | 13977-33-8  |      | C <sub>17</sub> H <sub>21</sub> N                                              |
| Demexiptiline         | Antidepressant       | 24701-51-7  |      | C <sub>18</sub> H <sub>18</sub> N <sub>2</sub> O                               |
| Democonazole          | Antifungal           | 70161-09-0  |      | C <sub>19</sub> H <sub>15</sub> Cl <sub>3</sub> N <sub>2</sub> O <sub>2</sub>  |
| Demoxepam             | Anxiolytic           | 963-39-3    |      | C <sub>15</sub> H <sub>11</sub> ClN <sub>2</sub> O <sub>2</sub>                |
| Demoxytocin           | Oxytocic             | 113-78-0    |      | C <sub>43</sub> H <sub>65</sub> N <sub>11</sub> O <sub>12</sub> S <sub>2</sub> |
| Denaverine            | Analgesic            | 3579-62-2   |      | C <sub>24</sub> H <sub>33</sub> NO <sub>3</sub>                                |
| Denbufylline          | Bronchodilator       | 57076-71-8  |      | C <sub>16</sub> H <sub>24</sub> N <sub>4</sub> O <sub>3</sub>                  |
| Denipride             | Gastroprokinetic     | 106972-33-2 |      | C <sub>18</sub> H <sub>26</sub> N <sub>4</sub> O <sub>5</sub>                  |
| Denopamine            | Cardiotonic          | 71771-90-9  |      | C <sub>18</sub> H <sub>23</sub> NO <sub>4</sub>                                |
| Denotivir             | Antiviral            | 51287-57-1  |      | C <sub>18</sub> H <sub>14</sub> ClN <sub>3</sub> O <sub>2</sub> S              |
| Denpidazone           | Unclassified         | 42438-73-3  |      | C <sub>20</sub> H <sub>20</sub> N <sub>2</sub> O <sub>3</sub>                  |
| Denufosol Tetrasodium | Decongestant         | 211448-85-0 |      | C <sub>18</sub> H <sub>27</sub> N <sub>5</sub> O <sub>21</sub> P <sub>4</sub>  |
| Denzimol              | Anticonvulsant       | 73931-96-1  |      | C <sub>19</sub> H <sub>20</sub> N <sub>2</sub> O                               |
| Deoxycholic Acid      | Choleretic           | 83-44-3     |      | C <sub>24</sub> H <sub>40</sub> O <sub>4</sub>                                 |
| Depramine             | Antidepressant       | 303-54-8    |      | C <sub>19</sub> H <sub>22</sub> N <sub>2</sub>                                 |
| Deprodone             | Antidepressant       | 20423-99-8  |      | C <sub>21</sub> H <sub>28</sub> O <sub>4</sub>                                 |
| Deprostit             | Antiulcerative       | 33813-84-2  |      | C <sub>21</sub> H <sub>28</sub> O <sub>4</sub>                                 |
| Deptropine Citrate    | Antihistaminic       | 604-51-3    |      | C <sub>23</sub> H <sub>27</sub> NO                                             |
| Deracoxib             | Antiinflammatory     | 169590-41-4 |      | C <sub>17</sub> H <sub>14</sub> F <sub>3</sub> N <sub>3</sub> O <sub>3</sub> S |
| Deramciclone          | Vasodilator          | 120444-71-5 |      | C <sub>20</sub> H <sub>31</sub> NO                                             |
| Derigidole            | Antidiabetic         | 122830-14-2 |      | C <sub>16</sub> H <sub>21</sub> N <sub>3</sub>                                 |
| Derpanicate           | Estrogen             | 99518-29-3  |      | C <sub>46</sub> H <sub>54</sub> N <sub>8</sub> O <sub>12</sub> S <sub>2</sub>  |
| Dersalazine           | Antiinflammatory     | 188913-58-8 | Y    | C <sub>35</sub> H <sub>32</sub> N <sub>6</sub> O <sub>4</sub>                  |
| Desciclovir           | Antiviral            | 84408-37-7  |      | C <sub>8</sub> H <sub>11</sub> N <sub>5</sub> O <sub>2</sub>                   |
| Descinolone Acetonide | Glucocorticoid       | 2135-14-0   |      | C <sub>24</sub> H <sub>31</sub> FO <sub>5</sub>                                |
| Deserpidine           | Antihypertensive     | 131-01-1    |      | C <sub>32</sub> H <sub>38</sub> N <sub>2</sub> O <sub>8</sub>                  |
| Desflurane            | Anesthetic           | 57041-67-5  |      | C <sub>3</sub> H <sub>2</sub> F <sub>6</sub> O                                 |
| Desglugastrin         | Antispasmodic        | 51987-65-6  |      | C <sub>49</sub> H <sub>61</sub> N <sub>9</sub> O <sub>13</sub>                 |
| Desipramine           | Antidepressant       | 50-47-5     | Y    | C <sub>18</sub> H <sub>22</sub> N <sub>2</sub>                                 |
| Deslanoside           | Cardiotonic          | 17598-65-1  |      | C <sub>47</sub> H <sub>74</sub> O <sub>19</sub>                                |
| Desloratadine         | Antihistaminic       | 100643-71-8 | Y    | C <sub>19</sub> H <sub>19</sub> ClN <sub>2</sub>                               |
| Desmeninol            | Unclassified         | 583-91-5    |      | C <sub>5</sub> H <sub>10</sub> O <sub>3</sub> S                                |

Table S1. Cont.

| Common Name                    | Indication       | CAS Number  | Oral | Molecular Formula                                                              |
|--------------------------------|------------------|-------------|------|--------------------------------------------------------------------------------|
| Desmethylmoramide              | Analgesic        | 1767-88-0   |      | C <sub>24</sub> H <sub>30</sub> N <sub>2</sub> O <sub>2</sub>                  |
| Descriptine                    | Pituitary        | 66759-48-6  |      | C <sub>32</sub> H <sub>45</sub> N <sub>5</sub> O <sub>4</sub>                  |
| Desogestrel                    | Progestogen      | 54024-22-5  | Y    | C <sub>22</sub> H <sub>30</sub> O                                              |
| Desomorphine                   | Analgesic        | 427-00-9    |      | C <sub>17</sub> H <sub>21</sub> NO <sub>2</sub>                                |
| Desonide                       | Antiinflammatory | 638-94-8    |      | C <sub>24</sub> H <sub>32</sub> O <sub>6</sub>                                 |
| Desoximetasone                 | Antiinflammatory | 382-67-2    |      | C <sub>22</sub> H <sub>29</sub> FO <sub>4</sub>                                |
| Desoxycorticosterone Acetate   | Steroid          | 56-47-3     |      | C <sub>23</sub> H <sub>32</sub> O <sub>4</sub>                                 |
| Desoxycorticosterone Pivalate  | Steroid          | 808-48-0    |      | C <sub>26</sub> H <sub>38</sub> O <sub>4</sub>                                 |
| Desvenlafaxine Succinate       | Antidepressant   | 93413-62-8  | Y    | C <sub>16</sub> H <sub>25</sub> NO <sub>2</sub>                                |
| Detanosal                      | Unclassified     | 23573-66-2  |      | C <sub>13</sub> H <sub>19</sub> NO <sub>3</sub>                                |
| Deterenol                      | Adrenergic       | 7376-66-1   |      | C <sub>11</sub> H <sub>17</sub> NO <sub>2</sub>                                |
| Detivaciclovir                 | Antiviral        | 220984-26-9 |      | C <sub>9</sub> H <sub>13</sub> N <sub>5</sub> O <sub>2</sub>                   |
| Detomidine                     | Analgesic        | 76631-46-4  |      | C <sub>12</sub> H <sub>14</sub> N <sub>2</sub>                                 |
| Detorubicin                    | Antineoplastic   | 66211-92-5  |      | C <sub>33</sub> H <sub>39</sub> NO <sub>14</sub>                               |
| Detrothyronine                 | Pituitary        | 5714-08-9   |      | C <sub>15</sub> H <sub>12</sub> I <sub>3</sub> NO <sub>4</sub>                 |
| Deutolperisone                 | Muscle Relaxant  | 474641-19-5 |      | C <sub>17</sub> H <sub>18</sub> D <sub>7</sub> NO                              |
| Devapamil                      | Antianginal      | 92302-55-1  |      | C <sub>26</sub> H <sub>36</sub> N <sub>2</sub> O <sub>3</sub>                  |
| Devazepide                     | Antispasmodic    | 103420-77-5 |      | C <sub>25</sub> H <sub>20</sub> N <sub>4</sub> O <sub>2</sub>                  |
| Dexamethasone                  | Glucocorticoid   | 50-02-2     | Y    | C <sub>22</sub> H <sub>29</sub> FO <sub>5</sub>                                |
| Dexamethasone Acefurate        | Steroid          | 83880-70-0  |      | C <sub>29</sub> H <sub>33</sub> FO <sub>8</sub>                                |
| Dexamethasone Acetate          | Glucocorticoid   | 1177-87-3   |      | C <sub>24</sub> H <sub>31</sub> FO <sub>6</sub>                                |
| Dexamethasone Beloxil          | Antiinflammatory | 150587-07-8 |      | C <sub>29</sub> H <sub>35</sub> FO <sub>5</sub>                                |
| Dexamethasone Dipropionate     | Antiinflammatory | 55541-30-5  |      | C <sub>28</sub> H <sub>37</sub> FO <sub>7</sub>                                |
| Dexamethasone Sodium Phosphate | Glucocorticoid   | 2392-39-4   |      | C <sub>22</sub> H <sub>28</sub> FN <sub>2</sub> O <sub>8</sub> P               |
| Dexamisole                     | Antidepressant   | 14769-74-5  |      | C <sub>11</sub> H <sub>12</sub> N <sub>2</sub> S                               |
| Dexbrompheniramine Maleate     | Antihistaminic   | 132-21-8    | Y    | C <sub>16</sub> H <sub>19</sub> BrN <sub>2</sub>                               |
| Dexbudesonide                  | Glucocorticoid   | 51372-29-3  |      | C <sub>25</sub> H <sub>34</sub> O <sub>6</sub>                                 |
| Dexchlorpheniramine Maleate    | Antihistaminic   | 25523-97-1  | Y    | C <sub>16</sub> H <sub>19</sub> ClN <sub>2</sub>                               |
| Dexclamol                      | Sedative         | 52340-25-7  |      | C <sub>24</sub> H <sub>29</sub> NO                                             |
| Dexecadotril                   | Antihypotensive  | 112573-72-5 |      | C <sub>21</sub> H <sub>23</sub> NO <sub>4</sub> S                              |
| Dexefaroxan                    | Antihypertensive | 143249-88-1 |      | C <sub>13</sub> H <sub>16</sub> N <sub>2</sub> O                               |
| Dexetimide                     | Antiparkinsonian | 21888-98-2  |      | C <sub>23</sub> H <sub>26</sub> N <sub>2</sub> O <sub>2</sub>                  |
| Dexetozoline                   | Decongestant     | 77519-25-6  |      | C <sub>13</sub> H <sub>20</sub> N <sub>2</sub> O <sub>3</sub> S                |
| Dexfenfluramine                | Anorexic         | 3239-44-9   |      | C <sub>12</sub> H <sub>16</sub> F <sub>3</sub> N                               |
| Dexfosfoserine                 | Antifungal       | 407-41-0    |      | C <sub>3</sub> H <sub>8</sub> NO <sub>6</sub> P                                |
| Dexibuprofen                   | Analgesic        | 51146-56-6  |      | C <sub>13</sub> H <sub>18</sub> O <sub>2</sub>                                 |
| Deximafen                      | Antidepressant   | 42116-77-8  |      | C <sub>11</sub> H <sub>13</sub> N <sub>3</sub>                                 |
| Dexindoprofen                  | Analgesic        | 53086-13-8  |      | C <sub>17</sub> H <sub>15</sub> NO <sub>3</sub>                                |
| Dexivacaine                    | Anesthetic       | 24358-84-7  |      | C <sub>15</sub> H <sub>22</sub> N <sub>2</sub> O                               |
| Dexketoprofen                  | Analgesic        | 22161-81-5  | Y    | C <sub>16</sub> H <sub>14</sub> O <sub>3</sub>                                 |
| Dexlansoprazole                | Antiulcerative   | 138530-94-6 | Y    | C <sub>16</sub> H <sub>14</sub> F <sub>3</sub> N <sub>3</sub> O <sub>2</sub> S |
| Dexlofedidine                  | Antihypertensive | 81447-79-2  |      | C <sub>11</sub> H <sub>12</sub> Cl <sub>2</sub> N <sub>2</sub> O               |
| Dexloxiglumide                 | Antispasmodic    | 119817-90-2 | Y    | C <sub>21</sub> H <sub>30</sub> Cl <sub>2</sub> N <sub>2</sub> O <sub>5</sub>  |
| Dexmedetomidine                | Anxiolytic       | 113775-47-6 |      | C <sub>13</sub> H <sub>16</sub> N <sub>2</sub>                                 |
| Dexmethylphenidate             | Nootropic        | 40431-64-9  | Y    | C <sub>14</sub> H <sub>19</sub> NO <sub>2</sub>                                |
| Dexnafenodone                  | Sedative         | 92629-87-3  |      | C <sub>20</sub> H <sub>23</sub> NO                                             |
| Dexniguldipine                 | Antihypertensive | 120054-86-6 |      | C <sub>36</sub> H <sub>39</sub> N <sub>3</sub> O <sub>6</sub>                  |
| Dexoxadrol                     | Analgesic        | 4741-41-7   |      | C <sub>20</sub> H <sub>23</sub> NO <sub>2</sub>                                |
| Dexpanthenol                   | Cholinergic      | 81-13-0     |      | C <sub>9</sub> H <sub>19</sub> NO <sub>4</sub>                                 |
| Dexpemedolac                   | Analgesic        | 114030-44-3 |      | C <sub>22</sub> H <sub>23</sub> NO <sub>3</sub>                                |
| Dexpropranolol                 | Antiarrhythmic   | 5051-22-9   |      | C <sub>16</sub> H <sub>21</sub> NO <sub>2</sub>                                |
| Dexproxibutene                 | Analgesic        | 47419-52-3  |      | C <sub>22</sub> H <sub>27</sub> NO <sub>2</sub>                                |
| Dextrazoxane                   | Antianginal      | 24584-09-6  |      | C <sub>11</sub> H <sub>16</sub> N <sub>4</sub> O <sub>4</sub>                  |
| Dexsecoverine                  | Antispasmodic    | 90237-04-0  |      | C <sub>22</sub> H <sub>35</sub> NO <sub>2</sub>                                |
| Dexsotalol                     | Antiarrhythmic   | 30236-32-9  |      | C <sub>12</sub> H <sub>20</sub> N <sub>2</sub> O <sub>3</sub> S                |
| Dextilidine                    | Antihistaminic   | 32447-90-8  |      | C <sub>17</sub> H <sub>23</sub> NO <sub>2</sub>                                |
| Dextiopronin                   | Antidote         | 29335-92-0  |      | C <sub>5</sub> H <sub>9</sub> NO <sub>3</sub> S                                |
| Dextofisopam                   | Antispasmodic    | 82059-50-5  |      | C <sub>22</sub> H <sub>26</sub> N <sub>2</sub> O <sub>4</sub>                  |
| Dextroamphetamine              | Nootropic        | 51-64-9     | Y    | C <sub>9</sub> H <sub>13</sub> N                                               |
| Dextrofemine                   | Antispasmodic    | 15687-08-8  |      | C <sub>18</sub> H <sub>23</sub> NO                                             |
| Dextromethorphan Hydrobromide  | Antitussive      | 125-71-3    | Y    | C <sub>18</sub> H <sub>25</sub> NO                                             |
| Dextromoramide                 | Analgesic        | 357-56-2    | Y    | C <sub>25</sub> H <sub>32</sub> N <sub>2</sub> O <sub>2</sub>                  |
| Dextrorphan                    | Analgesic        | 125-73-5    |      | C <sub>17</sub> H <sub>23</sub> NO                                             |

Table S1. Cont.

| Common Name           | Indication         | CAS Number  | Oral | Molecular Formula                                                                             |
|-----------------------|--------------------|-------------|------|-----------------------------------------------------------------------------------------------|
| Dextrothyroxine       | Antihyperlipidemic | 51-49-0     |      | C <sub>15</sub> H <sub>11</sub> I <sub>4</sub> NO <sub>4</sub>                                |
| Dexverapamil          | Antianginal        | 38321-02-7  |      | C <sub>27</sub> H <sub>38</sub> N <sub>2</sub> O <sub>4</sub>                                 |
| Dezaguanine           | Antineoplastic     | 41729-52-6  |      | C <sub>6</sub> H <sub>6</sub> N <sub>4</sub> O                                                |
| Dezinamide            | Anticonvulsant     | 91077-32-6  |      | C <sub>11</sub> H <sub>11</sub> F <sub>3</sub> N <sub>2</sub> O <sub>2</sub>                  |
| Dezocine              | Analgesic          | 53648-55-8  |      | C <sub>16</sub> H <sub>23</sub> NO                                                            |
| Diacerein             | Antirheumatic      | 13739-02-1  | Y    | C <sub>19</sub> H <sub>12</sub> O <sub>8</sub>                                                |
| Diacetamate           | Analgesic          | 2623-33-8   |      | C <sub>10</sub> H <sub>11</sub> NO <sub>3</sub>                                               |
| Diacetolol            | Antihypertensive   | 22568-64-5  |      | C <sub>16</sub> H <sub>24</sub> N <sub>2</sub> O <sub>4</sub>                                 |
| Diacetylmorphine      | Analgesic          | 561-27-3    |      | C <sub>21</sub> H <sub>23</sub> NO <sub>5</sub>                                               |
| Diacetylnalorphine    | Analgesic          | 2748-74-5   |      | C <sub>23</sub> H <sub>25</sub> NO <sub>5</sub>                                               |
| Diamfenetide          | Anthelmintic       | 36141-82-9  |      | C <sub>20</sub> H <sub>24</sub> N <sub>2</sub> O <sub>5</sub>                                 |
| Diamocaine Cyclamate  | Anesthetic         | 27112-37-4  |      | C <sub>25</sub> H <sub>37</sub> N <sub>3</sub> O                                              |
| Diampromide           | Analgesic          | 552-25-0    |      | C <sub>21</sub> H <sub>28</sub> N <sub>2</sub> O                                              |
| Diamthazole           | Antifungal         | 95-27-2     |      | C <sub>15</sub> H <sub>23</sub> N <sub>3</sub> OS                                             |
| Dianicline            | Antidepressant     | 292634-27-6 |      | C <sub>13</sub> H <sub>16</sub> N <sub>2</sub> O                                              |
| Diapamide             | Diuretic           | 3688-85-5   |      | C <sub>9</sub> H <sub>11</sub> ClN <sub>2</sub> O <sub>3</sub> S                              |
| Diaplasinin           | Anticoagulant      | 481631-45-2 |      | C <sub>32</sub> H <sub>31</sub> N <sub>5</sub> O                                              |
| Diarbarone            | Unclassified       | 1233-70-1   |      | C <sub>16</sub> H <sub>20</sub> N <sub>2</sub> O <sub>4</sub>                                 |
| Diathymosulfone       | Antibacterial      | 5964-62-5   |      | C <sub>32</sub> H <sub>34</sub> N <sub>4</sub> O <sub>4</sub> S                               |
| Diaveridine           | Antibacterial      | 5355-16-8   |      | C <sub>13</sub> H <sub>16</sub> N <sub>4</sub> O <sub>2</sub>                                 |
| Diazepam              | Anxiolytic         | 439-14-5    | Y    | C <sub>16</sub> H <sub>13</sub> ClN <sub>2</sub> O                                            |
| Diaziquone            | Antineoplastic     | 57998-68-2  |      | C <sub>16</sub> H <sub>20</sub> N <sub>4</sub> O <sub>6</sub>                                 |
| Diazoxide             | Antihypertensive   | 364-98-7    | Y    | C <sub>8</sub> H <sub>7</sub> ClN <sub>2</sub> O <sub>2</sub> S                               |
| Dibekacin             | Antibiotic         | 34493-98-6  |      | C <sub>18</sub> H <sub>37</sub> N <sub>5</sub> O <sub>8</sub>                                 |
| Dibemethine           | Antineoplastic     | 102-05-6    |      | C <sub>15</sub> H <sub>17</sub> N                                                             |
| Dibenzepin            | Antidepressant     | 4498-32-2   |      | C <sub>18</sub> H <sub>21</sub> N <sub>3</sub> O                                              |
| Dibenzothiophene      | Dermatologic       | 132-65-0    |      | C <sub>12</sub> H <sub>8</sub> S                                                              |
| Dibrospidium Chloride | Antibiotic         | 86641-76-1  |      | C <sub>18</sub> H <sub>32</sub> Br <sub>2</sub> Cl <sub>2</sub> N <sub>4</sub> O <sub>2</sub> |
| Dibucaine             | Anesthetic         | 85-79-0     |      | C <sub>20</sub> H <sub>29</sub> N <sub>3</sub> O <sub>2</sub>                                 |
| Dibuprol              | Choleretic         | 2216-77-5   |      | C <sub>11</sub> H <sub>24</sub> O <sub>3</sub>                                                |
| Dibupyrone            | Analgesic          | 772990-64-4 |      | C <sub>16</sub> H <sub>23</sub> N <sub>3</sub> O <sub>4</sub> S                               |
| Dibusadol             | Unclassified       | 24353-45-5  |      | C <sub>17</sub> H <sub>26</sub> N <sub>2</sub> O <sub>3</sub>                                 |
| Dibutoline Sulfate    | Antispasmodic      | 532-49-0    |      | C <sub>15</sub> H <sub>33</sub> N <sub>2</sub> O <sub>2</sub> .1/2O <sub>4</sub> S            |
| Dicarbene             | Antidepressant     | 17411-19-7  |      | C <sub>13</sub> H <sub>18</sub> N <sub>2</sub>                                                |
| Dicarfen              | Antiinflammatory   | 15585-88-3  |      | C <sub>19</sub> H <sub>24</sub> N <sub>2</sub> O <sub>2</sub>                                 |
| Dichlorisone Acetate  | Dermatologic       | 79-61-8     |      | C <sub>23</sub> H <sub>28</sub> Cl <sub>2</sub> O <sub>5</sub>                                |
| Dichlormezanone       | Anxiolytic         | 114676-16-3 |      | C <sub>11</sub> H <sub>11</sub> Cl <sub>2</sub> NO <sub>3</sub> S                             |
| Dichlorophene         | Anthelmintic       | 97-23-4     |      | C <sub>13</sub> H <sub>10</sub> Cl <sub>2</sub> O <sub>2</sub>                                |
| Dichlorophenarsine    | Antibacterial      | 455-83-4    |      | C <sub>6</sub> H <sub>6</sub> AsCl <sub>2</sub> NO                                            |
| Dichloroxylenol       | Anesthetic         | 133-53-9    |      | C <sub>8</sub> H <sub>8</sub> Cl <sub>2</sub> O                                               |
| Dichlorphenamide      | Antiglaucoma       | 120-97-8    | Y    | C <sub>6</sub> H <sub>6</sub> Cl <sub>2</sub> N <sub>2</sub> O <sub>4</sub> S <sub>2</sub>    |
| Dichlorvos            | Anthelmintic       | 62-73-7     |      | C <sub>4</sub> H <sub>7</sub> Cl <sub>2</sub> O <sub>4</sub> P                                |
| Dicrenone             | Antihypertensive   | 41020-79-5  |      | C <sub>26</sub> H <sub>36</sub> O <sub>5</sub>                                                |
| Diclazuril            | Antibacterial      | 101831-37-2 | Y    | C <sub>17</sub> H <sub>9</sub> Cl <sub>3</sub> N <sub>4</sub> O <sub>2</sub>                  |
| Diclofenac            | Antiinflammatory   | 15307-86-5  | Y    | C <sub>14</sub> H <sub>11</sub> Cl <sub>2</sub> NO <sub>2</sub>                               |
| Diclofensine          | Antidepressant     | 67165-56-4  |      | C <sub>17</sub> H <sub>17</sub> Cl <sub>2</sub> NO                                            |
| Diclofurime           | Antihypertensive   | 64743-08-4  |      | C <sub>18</sub> H <sub>22</sub> Cl <sub>2</sub> N <sub>2</sub> O <sub>3</sub>                 |
| Diclometide           | Antipsychotic      | 17243-49-1  |      | C <sub>14</sub> H <sub>20</sub> Cl <sub>2</sub> N <sub>2</sub> O <sub>2</sub>                 |
| Diclounixin           | Analgesic          | 17737-68-7  |      | C <sub>12</sub> H <sub>8</sub> Cl <sub>2</sub> N <sub>2</sub> O <sub>2</sub>                  |
| Dicloralurea          | Antibacterial      | 116-52-9    |      | C <sub>5</sub> H <sub>6</sub> Cl <sub>6</sub> N <sub>2</sub> O <sub>3</sub>                   |
| Dicloxacillin         | Antibiotic         | 3116-76-5   | Y    | C <sub>19</sub> H <sub>17</sub> Cl <sub>2</sub> N <sub>3</sub> O <sub>5</sub> S               |
| Dicolinium Iodide     | Muscle Relaxant    | 382-82-1    |      | C <sub>16</sub> H <sub>34</sub> I <sub>2</sub> N <sub>2</sub> O <sub>2</sub>                  |
| Dicresulene           | Unclassified       | 78480-14-5  |      | C <sub>15</sub> H <sub>16</sub> O <sub>8</sub> S <sub>2</sub>                                 |
| Dicumarol             | Anticoagulant      | 66-76-2     |      | C <sub>19</sub> H <sub>12</sub> O <sub>6</sub>                                                |
| Dicyclomine           | Antispasmodic      | 77-19-0     | Y    | C <sub>19</sub> H <sub>35</sub> NO <sub>2</sub>                                               |
| Didanosine            | Antiviral          | 69655-05-6  | Y    | C <sub>10</sub> H <sub>12</sub> N <sub>4</sub> O <sub>3</sub>                                 |
| Didrovaltrate         | Sedative           | 18296-45-2  |      | C <sub>22</sub> H <sub>32</sub> O <sub>8</sub>                                                |
| Dieldrin              | Dermatologic       | 60-57-1     |      | C <sub>12</sub> H <sub>8</sub> Cl <sub>6</sub> O                                              |
| Dienestrol            | Estrogen           | 84-17-3     |      | C <sub>18</sub> H <sub>18</sub> O <sub>2</sub>                                                |
| Dienogest             | Contraceptive      | 65928-58-7  | Y    | C <sub>20</sub> H <sub>25</sub> NO <sub>2</sub>                                               |
| Diethadione           | Anticonvulsant     | 702-54-5    |      | C <sub>8</sub> H <sub>13</sub> NO <sub>3</sub>                                                |
| Diethazine            | Antiparkinsonian   | 60-91-3     |      | C <sub>18</sub> H <sub>22</sub> N <sub>2</sub> S                                              |
| Diethyl Oxalate       | Anorexic           | 95-92-1     |      | C <sub>6</sub> H <sub>10</sub> O <sub>4</sub>                                                 |

Table S1. Cont.

| Common Name                      | Indication          | CAS Number  | Oral | Molecular Formula                                                             |
|----------------------------------|---------------------|-------------|------|-------------------------------------------------------------------------------|
| Diethylcarbamazine               | Anthelmintic        | 90-89-1     | Y    | C <sub>10</sub> H <sub>21</sub> N <sub>3</sub> O                              |
| Diethylpropion                   | Anorexic            | 90-84-6     | Y    | C <sub>13</sub> H <sub>19</sub> NO                                            |
| Diethylstilbestrol               | Antineoplastic      | 56-53-1     | Y    | C <sub>18</sub> H <sub>20</sub> O <sub>2</sub>                                |
| Diethylstilbestrol Dipalmitate   | Antineoplastic      | 6533-53-5   |      | C <sub>50</sub> H <sub>80</sub> O <sub>4</sub>                                |
| Diethylstilbestrol Dipropionate  | Antineoplastic      | 130-80-3    |      | C <sub>24</sub> H <sub>28</sub> O <sub>4</sub>                                |
| Diethylthiambutene               | Analgesic           | 86-14-6     |      | C <sub>16</sub> H <sub>21</sub> NS <sub>2</sub>                               |
| Dietifen                         | Antihistaminic      | 3686-78-0   |      | C <sub>21</sub> H <sub>27</sub> NO <sub>2</sub>                               |
| Difebarbamate                    | Sedative            | 15687-09-9  |      | C <sub>28</sub> H <sub>42</sub> N <sub>4</sub> O <sub>9</sub>                 |
| Difemerine                       | Antispasmodic       | 80387-96-8  |      | C <sub>20</sub> H <sub>25</sub> NO <sub>3</sub>                               |
| Difemetorex                      | Anorexic            | 13862-07-2  |      | C <sub>20</sub> H <sub>25</sub> NO                                            |
| Difenamizole                     | Analgesic           | 20170-20-1  |      | C <sub>20</sub> H <sub>22</sub> N <sub>4</sub> O                              |
| Difenclozaxine                   | Antidepressant      | 5617-26-5   |      | C <sub>19</sub> H <sub>22</sub> ClNO <sub>2</sub>                             |
| Difenoximide                     | Antispasmodic       | 47806-92-8  |      | C <sub>32</sub> H <sub>31</sub> N <sub>5</sub> O <sub>4</sub>                 |
| Difenoxin                        | Antidiarrheal       | 28782-42-5  | Y    | C <sub>28</sub> H <sub>28</sub> N <sub>2</sub> O <sub>2</sub>                 |
| Difetarsone                      | Antiamebic          | 3639-19-8   |      | C <sub>14</sub> H <sub>18</sub> As <sub>2</sub> N <sub>2</sub> O <sub>6</sub> |
| Difeterol                        | Adrenergic          | 14587-50-9  |      | C <sub>25</sub> H <sub>29</sub> NO <sub>2</sub>                               |
| Diflomotecan                     | Antineoplastic      | 220997-97-7 |      | C <sub>21</sub> H <sub>16</sub> F <sub>2</sub> N <sub>2</sub> O <sub>4</sub>  |
| Diflorasone Diacetate            | Antiinflammatory    | 33564-31-7  |      | C <sub>26</sub> H <sub>32</sub> F <sub>2</sub> O <sub>7</sub>                 |
| Difloxacin                       | Antibiotic          | 98106-17-3  |      | C <sub>21</sub> H <sub>19</sub> F <sub>2</sub> N <sub>3</sub> O <sub>3</sub>  |
| Difluanine                       | Nootropic           | 5522-39-4   |      | C <sub>28</sub> H <sub>33</sub> F <sub>2</sub> N <sub>3</sub>                 |
| Diflucortolone                   | Glucocorticoid      | 2607-06-9   |      | C <sub>22</sub> H <sub>28</sub> F <sub>2</sub> O <sub>4</sub>                 |
| Diflucortolone Pivalate          | Antiinflammatory    | 15845-96-2  |      | C <sub>27</sub> H <sub>36</sub> F <sub>2</sub> O <sub>5</sub>                 |
| Diflumidone Sodium               | Antiinflammatory    | 22736-85-2  |      | C <sub>14</sub> H <sub>11</sub> F <sub>2</sub> NO <sub>3</sub> S              |
| Diflunisal                       | Antiinflammatory    | 22494-42-4  | Y    | C <sub>13</sub> H <sub>8</sub> F <sub>2</sub> O <sub>3</sub>                  |
| Difluprednate                    | Antiinflammatory    | 23674-86-4  |      | C <sub>27</sub> H <sub>34</sub> F <sub>2</sub> O <sub>7</sub>                 |
| Difalone                         | Antiinflammatory    | 21626-89-1  |      | C <sub>16</sub> H <sub>12</sub> N <sub>2</sub> O <sub>2</sub>                 |
| Digitoxin                        | Cardiotonic         | 71-63-6     |      | C <sub>41</sub> H <sub>64</sub> O <sub>13</sub>                               |
| Digoxin                          | Cardiotonic         | 20830-75-5  | Y    | C <sub>41</sub> H <sub>64</sub> O <sub>14</sub>                               |
| Dihexyverine                     | Anticholelithogenic | 561-77-3    |      | C <sub>20</sub> H <sub>35</sub> NO <sub>2</sub>                               |
| Dihydralazine                    | Vasodilator         | 484-23-1    |      | C <sub>8</sub> H <sub>10</sub> N <sub>6</sub>                                 |
| Dihydrocodeine Bitartrate        | Analgesic           | 125-28-0    | Y    | C <sub>18</sub> H <sub>23</sub> NO <sub>3</sub>                               |
| Dihydroergotamine Mesylate       | Antimigraine        | 511-12-6    |      | C <sub>33</sub> H <sub>37</sub> N <sub>5</sub> O <sub>5</sub>                 |
| Dihydrostreptomycin Sulfate      | Antibacterial       | 128-46-1    |      | C <sub>21</sub> H <sub>41</sub> N <sub>7</sub> O <sub>12</sub>                |
| Dihydrotachysterol               | Steroid             | 67-96-9     |      | C <sub>28</sub> H <sub>46</sub> O                                             |
| Diisopromine                     | Antidepressant      | 5966-41-6   |      | C <sub>21</sub> H <sub>29</sub> N                                             |
| Diisopropanolamine               | Decongestant        | 110-97-4    |      | C <sub>6</sub> H <sub>15</sub> NO <sub>2</sub>                                |
| Diisopropylamine Dichloroacetate | Vasodilator         | 108-18-9    |      | C <sub>6</sub> H <sub>15</sub> N                                              |
| Dilazep                          | Vasodilator         | 35898-87-4  |      | C <sub>31</sub> H <sub>44</sub> N <sub>2</sub> O <sub>10</sub>                |
| Dilevalol                        | Antihypertensive    | 75659-07-3  |      | C <sub>19</sub> H <sub>24</sub> N <sub>2</sub> O <sub>3</sub>                 |
| Dilmefone                        | Anticonvulsant      | 37398-31-5  |      | C <sub>16</sub> H <sub>15</sub> NO <sub>3</sub>                               |
| Diloxanide                       | Antiamebic          | 579-38-4    |      | C <sub>9</sub> H <sub>9</sub> Cl <sub>2</sub> NO <sub>2</sub>                 |
| Diloxanide Furoate               | Antiamebic          | 3736-81-0   |      | C <sub>14</sub> H <sub>11</sub> Cl <sub>2</sub> NO <sub>4</sub>               |
| Diltiazem                        | Antianginal         | 42399-41-7  | Y    | C <sub>22</sub> H <sub>26</sub> N <sub>2</sub> O <sub>4</sub> S               |
| Dimabefylline                    | Bronchodilator      | 1703-48-6   |      | C <sub>16</sub> H <sub>19</sub> N <sub>5</sub> O <sub>2</sub>                 |
| Dimecamine                       | Muscle Relaxant     | 3570-07-8   |      | C <sub>12</sub> H <sub>23</sub> N                                             |
| Dimecolonium Iodide              | Antispasmodic       | 3425-97-6   |      | C <sub>14</sub> H <sub>30</sub> I <sub>2</sub> N <sub>2</sub> O <sub>2</sub>  |
| Dimecrotic Acid                  | Choleretic          | 7706-67-4   |      | C <sub>12</sub> H <sub>14</sub> O <sub>4</sub>                                |
| Dimefadane                       | Analgesic           | 5581-40-8   |      | C <sub>17</sub> H <sub>19</sub> N                                             |
| Dimeflin                         | Nootropic           | 1165-48-6   |      | C <sub>20</sub> H <sub>21</sub> NO <sub>3</sub>                               |
| Dimelazine                       | Antihypotensive     | 15302-12-2  |      | C <sub>19</sub> H <sub>22</sub> N <sub>2</sub> S                              |
| Dimemorfan                       | Antitussive         | 36309-01-0  |      | C <sub>18</sub> H <sub>25</sub> N                                             |
| Dimenhydrinate                   | Antiemetic          | 85-18-7     | Y    | C <sub>7</sub> H <sub>7</sub> ClN <sub>4</sub> O <sub>2</sub>                 |
| Dimenoxadol                      | Analgesic           | 509-78-4    |      | C <sub>20</sub> H <sub>25</sub> NO <sub>3</sub>                               |
| Dimepheptanol                    | Analgesic           | 545-90-4    |      | C <sub>21</sub> H <sub>29</sub> NO                                            |
| Dimepregnen                      | Progestogen         | 21208-26-4  |      | C <sub>23</sub> H <sub>36</sub> O <sub>2</sub>                                |
| Dimeprozan                       | Antipsychotic       | 6538-22-3   |      | C <sub>19</sub> H <sub>21</sub> NO <sub>2</sub>                               |
| Dimercaprol                      | Antidote            | 59-52-9     |      | C <sub>3</sub> H <sub>8</sub> OS <sub>2</sub>                                 |
| Dimesna                          | Mucolytic           | 45127-11-5  |      | C <sub>4</sub> H <sub>10</sub> O <sub>6</sub> S <sub>4</sub>                  |
| Dimesone                         | Unclassified        | 25092-07-3  |      | C <sub>23</sub> H <sub>31</sub> FO <sub>4</sub>                               |
| Dimestrol                        | Estrogen            | 130-79-0    |      | C <sub>20</sub> H <sub>24</sub> O <sub>2</sub>                                |
| Dimetacrine                      | Antidepressant      | 4757-55-5   |      | C <sub>20</sub> H <sub>26</sub> N <sub>2</sub>                                |
| Dimetamfetamine                  | Anorexic            | 17279-39-9  |      | C <sub>11</sub> H <sub>17</sub> N                                             |
| Dimethadione                     | Anticonvulsant      | 695-53-4    |      | C <sub>5</sub> H <sub>7</sub> NO <sub>3</sub>                                 |

Table S1. Cont.

| Common Name                          | Indication                      | CAS Number  | Oral | Molecular Formula                                                             |
|--------------------------------------|---------------------------------|-------------|------|-------------------------------------------------------------------------------|
| Dimethazan                           | Antidepressant                  | 519-30-2    |      | C <sub>11</sub> H <sub>17</sub> N <sub>5</sub> O <sub>2</sub>                 |
| Dimethindene Maleate                 | Antihistaminic                  | 5636-83-9   |      | C <sub>20</sub> H <sub>24</sub> N <sub>2</sub>                                |
| Dimethisoquin                        | Anesthetic                      | 86-80-6     |      | C <sub>17</sub> H <sub>24</sub> N <sub>2</sub> O                              |
| Dimethisterone                       | Progestogen                     | 79-64-1     |      | C <sub>23</sub> H <sub>32</sub> O <sub>2</sub>                                |
| Dimetholizine                        | Unclassified                    | 7008-00-6   |      | C <sub>15</sub> H <sub>24</sub> N <sub>2</sub> O <sub>2</sub>                 |
| Dimethoxanate                        | Antitussive                     | 477-93-0    |      | C <sub>19</sub> H <sub>22</sub> N <sub>2</sub> O <sub>5</sub> S               |
| 1,3-Dimethylbutyl Salicylate         | Antiinflammatory                | 22490-72-8  | Y    | C <sub>15</sub> H <sub>33</sub> N <sub>3</sub>                                |
| Dimethyl Fumarate                    | Immunomodulator                 | 624-49-7    | Y    | C <sub>6</sub> H <sub>8</sub> O <sub>4</sub>                                  |
| Dimethyl Sulfoxide                   | Urologic                        | 67-68-5     |      | C <sub>2</sub> H <sub>6</sub> OS                                              |
| Dimethylaminoethyl Reserpilate<br>Di | Antihypertensive                | 5585-67-1   |      | C <sub>26</sub> H <sub>35</sub> N <sub>3</sub> O <sub>5</sub>                 |
| Dimethylthiambutene                  | Analgesic                       | 524-84-5    |      | C <sub>14</sub> H <sub>17</sub> NS <sub>2</sub>                               |
| Dimethyltubocurarinium Chloride      | Neuromuscular Blocking<br>Agent | 33335-58-9Y |      | C <sub>40</sub> H <sub>48</sub> Cl <sub>2</sub> N <sub>2</sub> O <sub>6</sub> |
| Dimetipirium Bromide                 | Antihypertensive                | 51047-24-6  |      | C <sub>23</sub> H <sub>30</sub> BrNO <sub>3</sub>                             |
| Dimetofrine                          | Antihypotensive                 | 22950-29-4  |      | C <sub>11</sub> H <sub>17</sub> NO <sub>4</sub>                               |
| Dimetridazole                        | Antiprotozoal                   | 551-92-8    |      | C <sub>5</sub> H <sub>7</sub> N <sub>3</sub> O <sub>2</sub>                   |
| Diminazene                           | Analgesic                       | 536-71-0    |      | C <sub>14</sub> H <sub>15</sub> N <sub>7</sub>                                |
| Dimiracetam                          | Anticonvulsant                  | 126100-97-8 |      | C <sub>6</sub> H <sub>8</sub> N <sub>2</sub> O <sub>2</sub>                   |
| Dimorpholamine                       | Nootropic                       | 119-48-2    |      | C <sub>20</sub> H <sub>38</sub> N <sub>4</sub> O <sub>4</sub>                 |
| Dimoxamine                           | Nootropic                       | 52842-59-8  |      | C <sub>13</sub> H <sub>21</sub> NO <sub>2</sub>                               |
| Dimoxaprost                          | Prostaglandin                   | 90243-98-4  |      | C <sub>21</sub> H <sub>34</sub> O <sub>6</sub>                                |
| Dimpylate                            | Ectoparasiticide                | 333-41-5    |      | C <sub>12</sub> H <sub>21</sub> N <sub>2</sub> O <sub>3</sub> PS              |
| Dinaline                             | Bronchodilator                  | 58338-59-3  |      | C <sub>13</sub> H <sub>13</sub> N <sub>3</sub> O                              |
| Dinazafone                           | Anticonvulsant                  | 71119-12-5  |      | C <sub>20</sub> H <sub>21</sub> ClN <sub>2</sub> O <sub>2</sub>               |
| Diniprophylline                      | Bronchodilator                  | 17692-30-7  |      | C <sub>22</sub> H <sub>20</sub> N <sub>6</sub> O <sub>6</sub>                 |
| Dinitolmide                          | Antibacterial                   | 148-01-6    |      | C <sub>8</sub> H <sub>7</sub> N <sub>3</sub> O <sub>5</sub>                   |
| Dinoprost                            | Oxytocic                        | 551-11-1    | Y    | C <sub>20</sub> H <sub>34</sub> O <sub>5</sub>                                |
| Dinoprostone                         | Oxytocic                        | 363-24-6    |      | C <sub>20</sub> H <sub>32</sub> O <sub>5</sub>                                |
| Dinsed                               | Antibacterial                   | 96-62-8     |      | C <sub>14</sub> H <sub>14</sub> N <sub>4</sub> O <sub>8</sub> S <sub>2</sub>  |
| Diosmin                              | Capillary Protectant            | 520-27-4    | Y    | C <sub>28</sub> H <sub>32</sub> O <sub>15</sub>                               |
| Dioxadilol                           | Antihypertensive                | 80743-08-4  |      | C <sub>16</sub> H <sub>25</sub> NO <sub>4</sub>                               |
| Dioxadrol                            | Antidepressant                  | 6495-46-1   |      | C <sub>20</sub> H <sub>23</sub> NO <sub>2</sub>                               |
| Dioxamate                            | Antihistaminic                  | 3567-40-6   |      | C <sub>15</sub> H <sub>29</sub> NO <sub>4</sub>                               |
| Dioxaphetyl Butyrate                 | Antispasmodic                   | 467-86-7    |      | C <sub>22</sub> H <sub>27</sub> NO <sub>3</sub>                               |
| Dioxethedrin                         | Bronchodilator                  | 497-75-6    |      | C <sub>11</sub> H <sub>17</sub> NO <sub>3</sub>                               |
| Dioxifedrine                         | Adrenergic                      | 10329-60-9  |      | C <sub>10</sub> H <sub>15</sub> NO <sub>3</sub>                               |
| Dioxybenzone                         | Dermatologic                    | 131-53-3    |      | C <sub>14</sub> H <sub>12</sub> O <sub>4</sub>                                |
| Dioxyline Phosphate                  | Cardiotonic                     | 147-27-3    |      | C <sub>22</sub> H <sub>25</sub> NO <sub>4</sub>                               |
| Dipenine Bromide                     | Antispasmodic                   | 2001-81-2   |      | C <sub>20</sub> H <sub>38</sub> BrNO <sub>2</sub>                             |
| Diperodon                            | Anesthetic                      | 101-08-6    |      | C <sub>22</sub> H <sub>27</sub> N <sub>3</sub> O <sub>4</sub>                 |
| Diphenhydramine                      | Antihistaminic                  | 58-73-1     | Y    | C <sub>17</sub> H <sub>21</sub> NO                                            |
| Diphenidol                           | Antiemetic                      | 972-02-1    | Y    | C <sub>21</sub> H <sub>27</sub> NO                                            |
| Diphenoxylate /Atropine Sulfate      | Antispasmodic                   | 915-30-0    |      | C <sub>30</sub> H <sub>32</sub> N <sub>2</sub> O <sub>2</sub>                 |
| Diphenylpyraline                     | Antihistaminic                  | 147-20-6    |      | C <sub>19</sub> H <sub>23</sub> NO                                            |
| Diphoxazide                          | Antibacterial                   | 511-41-1    |      | C <sub>17</sub> H <sub>18</sub> N <sub>2</sub> O <sub>3</sub>                 |
| Dipipanone                           | Analgesic                       | 467-83-4    | Y    | C <sub>24</sub> H <sub>31</sub> NO                                            |
| Dipiproverine                        | Antispasmodic                   | 117-30-6    |      | C <sub>20</sub> H <sub>30</sub> N <sub>2</sub> O <sub>2</sub>                 |
| Dipivefrin                           | Mydriatic                       | 52365-63-6  | Y    | C <sub>19</sub> H <sub>29</sub> NO <sub>5</sub>                               |
| Diprafenone                          | Antiarrhythmic                  | 81447-80-5  |      | C <sub>23</sub> H <sub>31</sub> NO <sub>3</sub>                               |
| Diprenorphine                        | Antidote                        | 14357-78-9  |      | C <sub>26</sub> H <sub>35</sub> NO <sub>4</sub>                               |
| Diprobutine                          | Antiparkinsonian                | 61822-36-4  |      | C <sub>10</sub> H <sub>23</sub> N                                             |
| Diprofene                            | Antihypertensive                | 5835-72-3   |      | C <sub>22</sub> H <sub>29</sub> NOS                                           |
| Diproleandomycin                     | Antibiotic                      | 14289-25-9  |      | C <sub>41</sub> H <sub>69</sub> NO <sub>14</sub>                              |
| Diproqualone                         | Sedative                        | 36518-02-2  |      | C <sub>12</sub> H <sub>14</sub> N <sub>2</sub> O <sub>3</sub>                 |
| Diproteverine                        | Antihypertensive                | 69373-95-1  |      | C <sub>26</sub> H <sub>35</sub> NO <sub>4</sub>                               |
| Diproxadol                           | Analgesic                       | 52042-24-7  |      | C <sub>12</sub> H <sub>14</sub> ClNO <sub>4</sub>                             |
| Dipyridamole                         | Antithrombotic                  | 58-32-2     | Y    | C <sub>24</sub> H <sub>40</sub> N <sub>8</sub> O <sub>4</sub>                 |
| Dipyrrithione                        | Antibacterial                   | 3696-28-4   |      | C <sub>10</sub> H <sub>8</sub> N <sub>2</sub> O <sub>2</sub> S <sub>2</sub>   |
| Dipyrocetyl                          | Analgesic                       | 486-79-3    |      | C <sub>11</sub> H <sub>10</sub> O <sub>6</sub>                                |
| Dipyrone                             | Analgesic                       | 50567-35-6  |      | C <sub>13</sub> H <sub>17</sub> N <sub>3</sub> O <sub>4</sub> S               |
| Diquafosol Tetrasodium               | Mucolytic                       | 59985-21-6  |      | C <sub>18</sub> H <sub>26</sub> N <sub>4</sub> O <sub>23</sub> P <sub>4</sub> |
| Dirithromycin                        | Antibiotic                      | 62013-04-1  | Y    | C <sub>42</sub> H <sub>78</sub> N <sub>2</sub> O <sub>14</sub>                |



Table S1. Cont.

| Common Name            | Indication          | CAS Number  | Oral | Molecular Formula                                                                            |
|------------------------|---------------------|-------------|------|----------------------------------------------------------------------------------------------|
| Dirlotapide            | Antihyperlipidemic  | 481658-94-0 |      | C <sub>40</sub> H <sub>33</sub> F <sub>3</sub> N <sub>4</sub> O <sub>3</sub>                 |
| Disermolide            | Antiparkinsonian    | 127943-53-7 |      | C <sub>33</sub> H <sub>55</sub> NO <sub>8</sub>                                              |
| Disobutamide           | Antiarrhythmic      | 68284-69-5  |      | C <sub>23</sub> H <sub>38</sub> ClN <sub>3</sub> O                                           |
| Disogluside            | Unclassified        | 14144-06-0  |      | C <sub>33</sub> H <sub>52</sub> O <sub>8</sub>                                               |
| Disopyramide           | Antiarrhythmic      | 3737-09-5   | Y    | C <sub>21</sub> H <sub>29</sub> N <sub>3</sub> O                                             |
| Disoxaril              | Antiviral           | 87495-31-6  |      | C <sub>20</sub> H <sub>26</sub> N <sub>2</sub> O <sub>3</sub>                                |
| Distigmine Bromide     | Muscle Relaxant     | 15876-67-2  | Y    | C <sub>22</sub> H <sub>32</sub> Br <sub>2</sub> N <sub>4</sub> O <sub>4</sub>                |
| Disufenton Sodium      | Nootropic           | 168021-77-0 |      | C <sub>11</sub> H <sub>15</sub> NO <sub>7</sub> S <sub>2</sub>                               |
| Disulergine            | Urologic            | 59032-40-5  |      | C <sub>17</sub> H <sub>24</sub> N <sub>4</sub> O <sub>2</sub> S                              |
| Disulfiram             | Alcohol Deterrant   | 97-77-8     | Y    | C <sub>10</sub> H <sub>20</sub> N <sub>2</sub> S <sub>4</sub>                                |
| Disuprazole            | Ant ulcerative      | 99499-40-8  |      | C <sub>16</sub> H <sub>17</sub> N <sub>3</sub> OS <sub>2</sub>                               |
| Ditazole               | Antiinflammatory    | 18471-20-0  |      | C <sub>19</sub> H <sub>20</sub> N <sub>2</sub> O <sub>3</sub>                                |
| Ditekiren              | Antihypertensive    | 103336-05-6 |      | C <sub>50</sub> H <sub>75</sub> N <sub>9</sub> O <sub>8</sub>                                |
| Ditercalinium Chloride | Antihypertensive    | 74517-42-3  |      | C <sub>46</sub> H <sub>50</sub> Cl <sub>2</sub> N <sub>6</sub> O <sub>2</sub>                |
| Dithiazanine Iodide    | Anthelminthic       | 514-73-8    |      | C <sub>23</sub> H <sub>23</sub> N <sub>2</sub> S <sub>2</sub>                                |
| Ditiocarb              | Immunomodulator     | 147-84-2    |      | C <sub>5</sub> H <sub>11</sub> NS <sub>2</sub>                                               |
| Ditiomustine           | Antineoplastic      | 82599-22-2  |      | C <sub>10</sub> H <sub>18</sub> Cl <sub>2</sub> N <sub>6</sub> O <sub>4</sub> S <sub>2</sub> |
| Ditolamide             | Antibiotic          | 723-42-2    |      | C <sub>13</sub> H <sub>21</sub> NO <sub>2</sub> S                                            |
| Ditophal               | Antibiotic          | 584-69-0    |      | C <sub>12</sub> H <sub>14</sub> O <sub>2</sub> S <sub>2</sub>                                |
| Divabuterol            | Bronchodilator      | 54592-27-7  |      | C <sub>22</sub> H <sub>35</sub> NO <sub>5</sub>                                              |
| Divaplon               | Anxiolytic          | 90808-12-1  |      | C <sub>17</sub> H <sub>17</sub> N <sub>3</sub> O <sub>2</sub>                                |
| Dixanthogen            | Ectoparasiticide    | 502-55-6    |      | C <sub>6</sub> H <sub>10</sub> O <sub>2</sub> S <sub>4</sub>                                 |
| Dizatrifone            | Nootropic           | 92257-40-4  |      | C <sub>21</sub> H <sub>21</sub> N <sub>3</sub> O <sub>3</sub>                                |
| Dizocilpine Maleate    | Nootropic           | 77086-21-6  |      | C <sub>16</sub> H <sub>15</sub> N                                                            |
| Dobupride              | Gastroprokinetic    | 106707-51-1 |      | C <sub>20</sub> H <sub>30</sub> ClN <sub>3</sub> O <sub>4</sub>                              |
| Dobutamine             | Cardiotonic         | 34368-04-2  |      | C <sub>18</sub> H <sub>23</sub> NO <sub>3</sub>                                              |
| Docarpamine            | Cardiotonic         | 74639-40-0  |      | C <sub>21</sub> H <sub>30</sub> N <sub>2</sub> O <sub>8</sub> S                              |
| Docebenone             | Antiinflammatory    | 80809-81-0  |      | C <sub>21</sub> H <sub>26</sub> O <sub>3</sub>                                               |
| Docetaxel              | Antineoplastic      | 114977-28-5 |      | C <sub>43</sub> H <sub>53</sub> NO <sub>14</sub>                                             |
| Doconazole             | Antifungal          | 59831-63-9  |      | C <sub>26</sub> H <sub>22</sub> Cl <sub>2</sub> N <sub>2</sub> O <sub>3</sub>                |
| Doconexent             | Unclassified        | 6217-54-5   |      | C <sub>22</sub> H <sub>32</sub> O <sub>2</sub>                                               |
| Docusate Sodium        | Laxative            | 10041-19-7  |      | C <sub>20</sub> H <sub>38</sub> O <sub>7</sub> S                                             |
| Dodeclonium Bromide    | Antibiotic          | 15687-13-5  |      | C <sub>22</sub> H <sub>39</sub> BrClNO                                                       |
| Dodicin                | Antibacterial       | 6843-97-6   |      | C <sub>18</sub> H <sub>39</sub> N <sub>3</sub> O <sub>2</sub>                                |
| Dofamium Chloride      | Antihistaminic      | 54063-35-3  |      | C <sub>25</sub> H <sub>44</sub> ClN <sub>3</sub> O <sub>2</sub>                              |
| Dofequidar             | Antineoplastic      | 129716-58-1 |      | C <sub>30</sub> H <sub>31</sub> N <sub>3</sub> O <sub>3</sub>                                |
| Dofetilide             | Antiarrhythmic      | 115256-11-6 | Y    | C <sub>19</sub> H <sub>27</sub> N <sub>3</sub> O <sub>5</sub> S <sub>2</sub>                 |
| Dolasetron             | Antiemetic          | 115956-12-2 | Y    | C <sub>19</sub> H <sub>20</sub> N <sub>2</sub> O <sub>3</sub>                                |
| Doliracetam            | Anticonvulsant      | 84901-45-1  |      | C <sub>16</sub> H <sub>14</sub> N <sub>2</sub> O <sub>2</sub>                                |
| Domazoline Fumarate    | Anticholelithogenic | 6043-01-2   |      | C <sub>14</sub> H <sub>20</sub> N <sub>2</sub> O <sub>2</sub>                                |
| Domiodol               | Mucolytic           | 61869-07-6  |      | C <sub>5</sub> H <sub>9</sub> IO <sub>3</sub>                                                |
| Domiphen Bromide       | Antibacterial       | 538-71-6    |      | C <sub>22</sub> H <sub>40</sub> BrNO                                                         |
| Domipizone             | Bronchodilator      | 95355-10-5  |      | C <sub>13</sub> H <sub>16</sub> N <sub>2</sub> O <sub>4</sub>                                |
| Domitroban             | Antithrombotic      | 112966-96-8 |      | C <sub>20</sub> H <sub>27</sub> NO <sub>4</sub> S                                            |
| Domoprednate           | Dermatologic        | 66877-67-6  |      | C <sub>26</sub> H <sub>36</sub> O <sub>5</sub>                                               |
| Domoxin                | Antidepressant      | 61-74-5     |      | C <sub>16</sub> H <sub>18</sub> N <sub>2</sub> O <sub>2</sub>                                |
| Domperidone            | Antiemetic          | 57808-66-9  | Y    | C <sub>22</sub> H <sub>24</sub> ClN <sub>5</sub> O <sub>2</sub>                              |
| Donepezil              | Nootropic           | 120014-06-4 | Y    | C <sub>24</sub> H <sub>29</sub> NO <sub>3</sub>                                              |
| Donetidine             | Antihistaminic      | 99248-32-5  |      | C <sub>20</sub> H <sub>25</sub> N <sub>5</sub> O <sub>3</sub> S                              |
| Donitriptan            | Antimigraine        | 170912-52-4 |      | C <sub>23</sub> H <sub>25</sub> N <sub>5</sub> O <sub>2</sub>                                |
| Dopamantine            | Antiparkinsonian    | 39907-68-1  |      | C <sub>19</sub> H <sub>25</sub> NO <sub>3</sub>                                              |
| Dopamine               | Cardiotonic         | 51-61-6     | Y    | C <sub>8</sub> H <sub>11</sub> NO <sub>2</sub>                                               |
| Dopexamine             | Cardiotonic         | 86197-47-9  |      | C <sub>22</sub> H <sub>32</sub> N <sub>2</sub> O <sub>2</sub>                                |
| Dopropidil             | Antianginal         | 79700-61-1  |      | C <sub>20</sub> H <sub>35</sub> NO <sub>2</sub>                                              |
| Doqualast              | Antihistaminic      | 64019-03-0  |      | C <sub>13</sub> H <sub>8</sub> N <sub>2</sub> O <sub>3</sub>                                 |
| Doramapimod            | Antirheumatic       | 285983-48-4 |      | C <sub>31</sub> H <sub>37</sub> N <sub>5</sub> O <sub>3</sub>                                |
| Doramectin             | Antibacterial       | 117704-25-3 |      | C <sub>50</sub> H <sub>74</sub> O <sub>14</sub>                                              |
| Doranidazole           | Antiprotozoal       | 149838-23-3 |      | C <sub>8</sub> H <sub>13</sub> N <sub>3</sub> O <sub>6</sub>                                 |
| Dorastine              | Antihistaminic      | 21228-13-7  |      | C <sub>20</sub> H <sub>22</sub> ClN <sub>3</sub>                                             |
| Doreptide              | Antiparkinsonian    | 90104-48-6  |      | C <sub>17</sub> H <sub>24</sub> N <sub>4</sub> O <sub>3</sub>                                |
| Doretinel              | Dermatologic        | 104561-36-6 |      | C <sub>24</sub> H <sub>30</sub> O <sub>2</sub>                                               |
| Doripenem              | Antibiotic          | 148016-81-3 |      | C <sub>15</sub> H <sub>24</sub> N <sub>4</sub> O <sub>6</sub> S <sub>2</sub>                 |
| Dorzolamide            | Antiglaucoma        | 120279-96-1 |      | C <sub>10</sub> H <sub>16</sub> N <sub>2</sub> O <sub>4</sub> S <sub>3</sub>                 |

Table S1. Cont.

| Common Name               | Indication            | CAS Number  | Oral | Molecular Formula                                                                            |
|---------------------------|-----------------------|-------------|------|----------------------------------------------------------------------------------------------|
| Dosergoside               | Antiinflammatory      | 87178-42-5  |      | C <sub>34</sub> H <sub>53</sub> N <sub>3</sub> O <sub>3</sub>                                |
| Dotarizine                | Vasodilator           | 84625-59-2  |      | C <sub>29</sub> H <sub>34</sub> N <sub>2</sub> O <sub>2</sub>                                |
| Dotefonium Bromide        | Antispasmodic         | 26058-50-4  |      | C <sub>20</sub> H <sub>27</sub> BrN <sub>2</sub> O <sub>2</sub> S                            |
| Dothiepin                 | Antidepressant        | 113-53-1    | Y    | C <sub>19</sub> H <sub>21</sub> NS                                                           |
| Doxaminol                 | Cardiotonic           | 55286-56-1  |      | C <sub>26</sub> H <sub>29</sub> NO <sub>3</sub>                                              |
| Doxapram                  | Respiratory Stimulant | 309-29-5    |      | C <sub>24</sub> H <sub>30</sub> N <sub>2</sub> O <sub>2</sub>                                |
| Doxaprost                 | Bronchodilator        | 51953-95-8  |      | C <sub>21</sub> H <sub>36</sub> O <sub>4</sub>                                               |
| Doxazosin                 | Antihypertensive      | 74191-85-8  | Y    | C <sub>23</sub> H <sub>25</sub> N <sub>5</sub> O <sub>5</sub>                                |
| Doxefazepam               | Sedative              | 40762-15-0  |      | C <sub>17</sub> H <sub>14</sub> ClFN <sub>2</sub> O <sub>3</sub>                             |
| Doxenitoin                | Anticonvulsant        | 3254-93-1   |      | C <sub>15</sub> H <sub>14</sub> N <sub>2</sub> O                                             |
| Doxepin                   | Antidepressant        | 1668-19-5   | Y    | C <sub>19</sub> H <sub>21</sub> NO                                                           |
| Doxercalciferol           | Thyroid               | 54573-75-0  | Y    | C <sub>28</sub> H <sub>44</sub> O <sub>2</sub>                                               |
| Doxibetasol               | Glucocorticoid        | 1879-77-2   |      | C <sub>22</sub> H <sub>29</sub> FO <sub>4</sub>                                              |
| Doxifluridine             | Antineoplastic        | 3094-09-5   | Y    | C <sub>9</sub> H <sub>11</sub> FN <sub>2</sub> O <sub>5</sub>                                |
| Doxofylline               | Bronchodilator        | 69975-86-6  | Y    | C <sub>11</sub> H <sub>14</sub> N <sub>4</sub> O <sub>4</sub>                                |
| Doxorubicin               | Antineoplastic        | 23214-92-8  | Y    | C <sub>27</sub> H <sub>29</sub> NO <sub>11</sub>                                             |
| Doxpicomine               | Analgesic             | 62904-71-6  |      | C <sub>12</sub> H <sub>18</sub> N <sub>2</sub> O <sub>2</sub>                                |
| Doxycycline               | Antibiotic            | 564-25-0    | Y    | C <sub>22</sub> H <sub>24</sub> N <sub>2</sub> O <sub>8</sub>                                |
| Doxylamine                | Antihistaminic        | 469-21-6    | Y    | C <sub>17</sub> H <sub>22</sub> N <sub>2</sub> O                                             |
| Draflazine                | Cardiotonic           | 120770-34-5 |      | C <sub>30</sub> H <sub>33</sub> Cl <sub>2</sub> F <sub>2</sub> N <sub>5</sub> O <sub>2</sub> |
| Dramedilol                | Antihypertensive      | 76953-65-6  |      | C <sub>20</sub> H <sub>29</sub> N <sub>5</sub> O <sub>4</sub>                                |
| Draquinolol               | Antihyperlipidemic    | 67793-71-9  |      | C <sub>24</sub> H <sub>30</sub> N <sub>2</sub> O <sub>4</sub>                                |
| Drazidox                  | Antibacterial         | 27314-77-8  |      | C <sub>10</sub> H <sub>10</sub> N <sub>4</sub> O <sub>3</sub>                                |
| Dribendazole              | Anthelminthic         | 63667-16-3  |      | C <sub>15</sub> H <sub>19</sub> N <sub>3</sub> O <sub>2</sub> S                              |
| Drinidene                 | Analgesic             | 53394-92-6  |      | C <sub>10</sub> H <sub>9</sub> NO                                                            |
| Drobuline                 | Antiarrhythmic        | 58473-73-7  |      | C <sub>19</sub> H <sub>25</sub> NO                                                           |
| Drocarbil                 | Anthelminthic         | 63-75-2     |      | C <sub>8</sub> H <sub>13</sub> NO <sub>2</sub>                                               |
| Drocinonide               | Antiinflammatory      | 2355-59-1   |      | C <sub>24</sub> H <sub>35</sub> FO <sub>6</sub>                                              |
| Droclidinium Bromide      | Antihypertensive      | 29125-56-2  |      | C <sub>22</sub> H <sub>32</sub> BrNO <sub>3</sub>                                            |
| Drofenine                 | Antispasmodic         | 1679-76-1   |      | C <sub>20</sub> H <sub>31</sub> NO <sub>2</sub>                                              |
| Droloxifene               | Antineoplastic        | 82413-20-5  |      | C <sub>26</sub> H <sub>29</sub> NO <sub>2</sub>                                              |
| Drometrizole              | Dermatologic          | 2440-22-4   |      | C <sub>13</sub> H <sub>11</sub> N <sub>3</sub> O                                             |
| Dromostanolone Propionate | Antineoplastic        | 521-12-0    |      | C <sub>23</sub> H <sub>36</sub> O <sub>3</sub>                                               |
| Dronabinol                | Antiemetic            | 1972-08-3   | Y    | C <sub>21</sub> H <sub>30</sub> O <sub>2</sub>                                               |
| Dronedarone               | Antiarrhythmic        | 141626-36-0 | Y    | C <sub>31</sub> H <sub>44</sub> N <sub>2</sub> O <sub>5</sub> S                              |
| Dropempine                | Unclassified          | 34703-49-6  |      | C <sub>10</sub> H <sub>19</sub> N                                                            |
| Droperidol                | Antipsychotic         | 548-73-2    |      | C <sub>22</sub> H <sub>22</sub> FN <sub>3</sub> O <sub>2</sub>                               |
| Droprenilamine            | Vasodilator           | 57653-27-7  |      | C <sub>24</sub> H <sub>33</sub> N                                                            |
| Dropropizine              | Antitussive           | 17692-31-8  |      | C <sub>13</sub> H <sub>20</sub> N <sub>2</sub> O <sub>2</sub>                                |
| Drospirenone              | Contraceptive         | 67392-87-4  | Y    | C <sub>24</sub> H <sub>30</sub> O <sub>3</sub>                                               |
| Drotaverine               | Antispasmodic         | 14009-24-6  | Y    | C <sub>24</sub> H <sub>31</sub> NO <sub>4</sub>                                              |
| Drotebanol                | Antitussive           | 3176-03-2   | Y    | C <sub>19</sub> H <sub>27</sub> NO <sub>4</sub>                                              |
| Droxacin Sodium           | Antibacterial         | 35067-47-1  |      | C <sub>14</sub> H <sub>13</sub> NO <sub>4</sub>                                              |
| Droxicainide              | Antiarrhythmic        | 78289-26-6  |      | C <sub>16</sub> H <sub>24</sub> N <sub>2</sub> O <sub>2</sub>                                |
| Droxicam                  | Antiinflammatory      | 90101-16-9  |      | C <sub>16</sub> H <sub>11</sub> N <sub>3</sub> O <sub>5</sub> S                              |
| Droxidopa                 | Antiparkinsonian      | 23651-95-8  | Y    | C <sub>9</sub> H <sub>11</sub> NO <sub>5</sub>                                               |
| Droxinavir                | Antiviral             | 159910-86-8 |      | C <sub>29</sub> H <sub>51</sub> N <sub>5</sub> O <sub>4</sub>                                |
| Droxypropine              | Mydriatic             | 15599-26-5  |      | C <sub>18</sub> H <sub>27</sub> NO <sub>3</sub>                                              |
| Duazomycin                | Antineoplastic        | 2508-89-6   |      | C <sub>8</sub> H <sub>15</sub> N <sub>3</sub> O <sub>4</sub>                                 |
| Dulofibrate               | Antihyperlipidemic    | 61887-16-9  |      | C <sub>16</sub> H <sub>14</sub> Cl <sub>2</sub> O <sub>3</sub>                               |
| Duloxetine                | Antidepressant        | 116539-59-4 | Y    | C <sub>18</sub> H <sub>19</sub> NOS                                                          |
| Dulozafone                | Anticonvulsant        | 75616-02-3  |      | C <sub>20</sub> H <sub>22</sub> Cl <sub>2</sub> N <sub>2</sub> O <sub>4</sub>                |
| Duometacin                | Antiinflammatory      | 25771-23-7  |      | C <sub>20</sub> H <sub>19</sub> NO <sub>5</sub>                                              |
| Duoperone Fumarate        | Nootropic             | 62030-88-0  |      | C <sub>28</sub> H <sub>26</sub> F <sub>4</sub> N <sub>2</sub> O <sub>5</sub>                 |
| Dupracetam                | Nootropic             | 59776-90-8  |      | C <sub>12</sub> H <sub>18</sub> N <sub>4</sub> O <sub>4</sub>                                |
| Dyclonine                 | Anesthetic            | 586-60-7    | Y    | C <sub>18</sub> H <sub>27</sub> NO <sub>2</sub>                                              |
| Dutasteride               | Steroid               | 164656-23-9 | Y    | C <sub>27</sub> H <sub>30</sub> F <sub>6</sub> N <sub>2</sub> O <sub>2</sub>                 |
| Dydrogesterone            | Progestogen           | 152-62-5    | Y    | C <sub>21</sub> H <sub>28</sub> O <sub>2</sub>                                               |
| Dymanthine                | Anthelminthic         | 124-28-7    | Y    | C <sub>20</sub> H <sub>43</sub> N                                                            |
| Dyphylline                | Bronchodilator        | 479-18-5    |      | C <sub>10</sub> H <sub>14</sub> N <sub>4</sub> O <sub>4</sub>                                |
| Ebalzotan                 | Antidepressant        | 149494-37-1 | Y    | C <sub>19</sub> H <sub>30</sub> N <sub>2</sub> O <sub>2</sub>                                |
| Ebastine                  | Antihistaminic        | 90729-43-4  | Y    | C <sub>32</sub> H <sub>39</sub> NO <sub>2</sub>                                              |
| Eberconazole              | Antifungal            | 128326-82-9 |      | C <sub>18</sub> H <sub>14</sub> Cl <sub>2</sub> N <sub>2</sub>                               |

Table S1. Cont.

| Common Name          | Indication          | CAS Number  | Oral | Molecular Formula                                                               |
|----------------------|---------------------|-------------|------|---------------------------------------------------------------------------------|
| Ebiratide            | Steroid             | 105250-86-0 |      | C <sub>48</sub> H <sub>73</sub> N <sub>11</sub> O <sub>10</sub> S               |
| Ebrotidine           | Antiulcerative      | 100981-43-9 | Y    | C <sub>14</sub> H <sub>17</sub> BrN <sub>6</sub> O <sub>2</sub> S <sub>3</sub>  |
| Ebselen              | Nootropic           | 60940-34-3  | Y    | C <sub>13</sub> H <sub>9</sub> NOSe                                             |
| Ecabapide            | Antiulcerative      | 104775-36-2 |      | C <sub>20</sub> H <sub>25</sub> N <sub>3</sub> O <sub>4</sub>                   |
| Ecabet               | Antiulcerative      | 33159-27-2  | Y    | C <sub>20</sub> H <sub>28</sub> O <sub>5</sub> S                                |
| Ecadotril            | Antihypotensive     | 112573-73-6 |      | C <sub>21</sub> H <sub>23</sub> NO <sub>4</sub> S                               |
| Ecalcidene           | Dermatologic        | 150337-94-3 |      | C <sub>29</sub> H <sub>45</sub> NO <sub>3</sub>                                 |
| Ecamsule             | Dermatologic        | 92761-26-7  |      | C <sub>28</sub> H <sub>34</sub> O <sub>8</sub> S <sub>2</sub>                   |
| Ecastolol            | Antianginal         | 77695-52-4  |      | C <sub>26</sub> H <sub>33</sub> N <sub>3</sub> O <sub>6</sub>                   |
| Ecenofloxacin        | Antibiotic          | 162301-05-5 |      | C <sub>19</sub> H <sub>21</sub> FN <sub>4</sub> O <sub>3</sub>                  |
| Echothiophate Iodide | Cholinergic         | 513-10-0    |      | C <sub>9</sub> H <sub>23</sub> INO <sub>3</sub> PS                              |
| Ecipramidil          | Antihypotensive     | 64552-16-5  |      | C <sub>29</sub> H <sub>33</sub> NO <sub>5</sub>                                 |
| Eclanamine Maleate   | Antidepressant      | 67450-44-6  |      | C <sub>16</sub> H <sub>22</sub> Cl <sub>2</sub> N <sub>2</sub> O                |
| Eclazolast           | Antihistaminic      | 80263-73-6  |      | C <sub>12</sub> H <sub>12</sub> ClNO <sub>4</sub>                               |
| Ecomustine           | Antineoplastic      | 98383-18-7  |      | C <sub>10</sub> H <sub>18</sub> ClN <sub>3</sub> O <sub>6</sub>                 |
| Econazole            | Antifungal          | 27220-47-9  | Y    | C <sub>18</sub> H <sub>15</sub> Cl <sub>3</sub> N <sub>2</sub> O                |
| Ecopipam             | Sedative            | 112108-01-7 | Y    | C <sub>19</sub> H <sub>20</sub> ClNO                                            |
| Ecopladib            | Analgesic           | 381683-92-7 |      | C <sub>39</sub> H <sub>33</sub> Cl <sub>3</sub> N <sub>2</sub> O <sub>5</sub> S |
| Ecraprost            | Anticoagulant       | 136892-64-3 |      | C <sub>28</sub> H <sub>48</sub> O <sub>6</sub>                                  |
| Ectylurea            | Sedative            | 95-04-5     |      | C <sub>7</sub> H <sub>12</sub> N <sub>2</sub> O <sub>2</sub>                    |
| Edaglitazone         | Antidiabetic        | 213411-83-7 |      | C <sub>24</sub> H <sub>20</sub> N <sub>2</sub> O <sub>4</sub> S <sub>2</sub>    |
| Edaravone            | Nootropic           | 89-25-8     |      | C <sub>10</sub> H <sub>10</sub> N <sub>2</sub> O                                |
| Edatrexate           | Antineoplastic      | 80576-83-6  |      | C <sub>22</sub> H <sub>25</sub> N <sub>7</sub> O <sub>5</sub>                   |
| Edelfosine           | Antineoplastic      | 70641-51-9  | Y    | C <sub>27</sub> H <sub>58</sub> NO <sub>6</sub> P                               |
| Edetate              | Antidote            | 60-00-4     |      | C <sub>10</sub> H <sub>16</sub> N <sub>2</sub> O <sub>8</sub>                   |
| Edifolone Acetate    | Antiarrhythmic      | 90733-40-7  |      | C <sub>24</sub> H <sub>37</sub> NO <sub>4</sub>                                 |
| Edogestrone          | Progestogen         | 809-01-8    |      | C <sub>26</sub> H <sub>38</sub> O <sub>5</sub>                                  |
| Edonentan            | Cardiotonic         | 210891-04-6 |      | C <sub>28</sub> H <sub>32</sub> N <sub>4</sub> O <sub>5</sub> S                 |
| Edotecarin           | Antineoplastic      | 174402-32-5 |      | C <sub>29</sub> H <sub>28</sub> N <sub>4</sub> O <sub>11</sub>                  |
| Edoxudine            | Antiviral           | 15176-29-1  |      | C <sub>11</sub> H <sub>16</sub> N <sub>2</sub> O <sub>5</sub>                   |
| Edronocaine          | Analgesic           | 190258-12-9 |      | C <sub>15</sub> H <sub>25</sub> NO <sub>2</sub>                                 |
| Edrophonium          | Cholinergic         | 312-48-1    |      | C <sub>10</sub> H <sub>16</sub> NO+                                             |
| Efaproxiral          | Antihypotensive     | 131179-95-8 |      | C <sub>20</sub> H <sub>23</sub> NO <sub>4</sub>                                 |
| Efaroxan             | Antihypertensive    | 89197-32-0  | Y    | C <sub>13</sub> H <sub>16</sub> N <sub>2</sub> O                                |
| Efavirenz            | Antiviral           | 154598-52-4 | Y    | C <sub>14</sub> H <sub>9</sub> ClF <sub>3</sub> NO <sub>2</sub>                 |
| Efegatran Sulfate    | Antithrombotic      | 105806-65-3 |      | C <sub>21</sub> H <sub>32</sub> N <sub>6</sub> O <sub>3</sub>                   |
| Efepristin           | Antibiotic          | 57206-54-9  |      | C <sub>44</sub> H <sub>52</sub> N <sub>8</sub> O <sub>10</sub>                  |
| Efetzole             | Antidepressant      | 90408-21-2  |      | C <sub>12</sub> H <sub>14</sub> N <sub>2</sub>                                  |
| Efipladib            | Antihypotensive     | 381683-94-9 |      | C <sub>40</sub> H <sub>35</sub> Cl <sub>3</sub> N <sub>2</sub> O <sub>4</sub> S |
| Efletirizine         | Antihistaminic      | 150756-35-7 |      | C <sub>21</sub> H <sub>24</sub> F <sub>2</sub> N <sub>2</sub> O <sub>3</sub>    |
| Eflornithine         | Antineoplastic      | 70052-12-9  | Y    | C <sub>6</sub> H <sub>12</sub> F <sub>2</sub> N <sub>2</sub> O <sub>2</sub>     |
| Efloxate             | Vasodilator         | 119-41-5    |      | C <sub>19</sub> H <sub>16</sub> O <sub>5</sub>                                  |
| Eflucimibe           | Antihyperlipidemic  | 202340-45-2 |      | C <sub>29</sub> H <sub>43</sub> NO <sub>2</sub> S                               |
| Eflumast             | Antihistaminic      | 70977-46-7  |      | C <sub>10</sub> H <sub>18</sub> FN <sub>3</sub> O <sub>3</sub>                  |
| Efonidipine          | Antihypertensive    | 111011-63-3 | Y    | C <sub>34</sub> H <sub>38</sub> N <sub>3</sub> O <sub>7</sub> P                 |
| Eglumetad            | Anxiolytic          | 176199-48-7 |      | C <sub>8</sub> H <sub>11</sub> NO <sub>4</sub>                                  |
| Egualen              | Antiulcerative      | 99287-30-6  | Y    | C <sub>15</sub> H <sub>18</sub> O <sub>3</sub> S                                |
| Elacridar            | Antineoplastic      | 143664-11-3 |      | C <sub>34</sub> H <sub>33</sub> N <sub>3</sub> O <sub>5</sub>                   |
| Elantrine            | Anticholelithogenic | 1232-85-5   |      | C <sub>20</sub> H <sub>24</sub> N <sub>2</sub>                                  |
| Elanzepine           | Anticonvulsant      | 6196-08-3   |      | C <sub>19</sub> H <sub>21</sub> ClN <sub>2</sub>                                |
| Elarofiban           | Anticoagulant       | 198958-88-2 |      | C <sub>22</sub> H <sub>32</sub> N <sub>4</sub> O <sub>4</sub>                   |
| Elbanizine           | Antihistaminic      | 110629-41-9 |      | C <sub>26</sub> H <sub>31</sub> N <sub>5</sub> O <sub>2</sub>                   |
| Eldacimibe           | Antihyperlipidemic  | 141993-70-6 |      | C <sub>39</sub> H <sub>58</sub> N <sub>2</sub> O <sub>5</sub>                   |
| Eletriptan           | Antimigraine        | 143322-58-1 | Y    | C <sub>22</sub> H <sub>26</sub> N <sub>2</sub> O <sub>2</sub> S                 |
| Elfazepam            | Anxiolytic          | 52042-01-0  |      | C <sub>19</sub> H <sub>18</sub> ClFN <sub>2</sub> O <sub>3</sub> S              |
| Elgodipine           | Antianginal         | 119413-55-7 |      | C <sub>29</sub> H <sub>33</sub> FN <sub>2</sub> O <sub>6</sub>                  |
| Elinafide            | Antineoplastic      | 162706-37-8 |      | C <sub>31</sub> H <sub>28</sub> N <sub>4</sub> O <sub>4</sub>                   |
| Eliprodil            | Antiparkinsonian    | 119431-25-3 |      | C <sub>20</sub> H <sub>23</sub> ClFNO                                           |
| Elisartan            | Antihypertensive    | 149968-26-3 |      | C <sub>27</sub> H <sub>29</sub> ClN <sub>6</sub> O <sub>5</sub>                 |
| Ellagic Acid         | Hemostatic          | 476-66-4    |      | C <sub>14</sub> H <sub>6</sub> O <sub>8</sub>                                   |
| Elliptinium Acetate  | Antineoplastic      | 58337-35-2  |      | C <sub>20</sub> H <sub>20</sub> N <sub>2</sub> O <sub>3</sub>                   |
| Elmustine            | Antineoplastic      | 60784-46-5  |      | C <sub>5</sub> H <sub>10</sub> ClN <sub>3</sub> O <sub>3</sub>                  |
| Elnadipine           | Antiparkinsonian    | 103946-15-2 |      | C <sub>19</sub> H <sub>19</sub> Cl <sub>2</sub> N <sub>3</sub> O <sub>3</sub>   |

Table S1. Cont.

| Common Name          | Indication          | CAS Number  | Oral | Molecular Formula                                                              |
|----------------------|---------------------|-------------|------|--------------------------------------------------------------------------------|
| Elomotecan           | Antineoplastic      | 220998-10-7 |      | C <sub>29</sub> H <sub>32</sub> ClN <sub>3</sub> O <sub>4</sub>                |
| Elopirazole          | Antipsychotic       | 115464-77-2 |      | C <sub>23</sub> H <sub>22</sub> FN <sub>3</sub> O                              |
| Elsamitrucin         | Antineoplastic      | 97068-30-9  |      | C <sub>33</sub> H <sub>35</sub> NO <sub>13</sub>                               |
| Eltanolone           | Anesthetic          | 128-20-1    |      | C <sub>21</sub> H <sub>34</sub> O <sub>2</sub>                                 |
| Eltenac              | Antiinflammatory    | 72895-88-6  |      | C <sub>12</sub> H <sub>9</sub> Cl <sub>2</sub> NO <sub>2</sub> S               |
| Eltoprazine          | Antipsychotic       | 98224-03-4  | Y    | C <sub>12</sub> H <sub>16</sub> N <sub>2</sub> O <sub>2</sub>                  |
| Eltrombopag Olamine  | Hematinic           | 496775-61-2 | Y    | C <sub>25</sub> H <sub>22</sub> N <sub>4</sub> O <sub>4</sub>                  |
| Elucaine             | Anticholelithogenic | 25314-87-8  |      | C <sub>19</sub> H <sub>23</sub> NO <sub>2</sub>                                |
| Elvucitabine         | Antiviral           | 181785-84-2 |      | C <sub>9</sub> H <sub>10</sub> FN <sub>3</sub> O <sub>3</sub>                  |
| Elzasonan Citrate    | Antidepressant      | 361343-19-3 |      | C <sub>22</sub> H <sub>23</sub> Cl <sub>2</sub> N <sub>3</sub> O <sub>5</sub>  |
| Elziverine           | Antispasmodic       | 95520-81-3  |      | C <sub>32</sub> H <sub>37</sub> N <sub>3</sub> O <sub>5</sub>                  |
| Emakalim             | Antihypertensive    | 129729-66-4 |      | C <sub>17</sub> H <sub>16</sub> N <sub>2</sub> O <sub>3</sub>                  |
| Emapunil             | Unclassified        | 226954-04-7 |      | C <sub>23</sub> H <sub>23</sub> N <sub>5</sub> O <sub>2</sub>                  |
| Embeconazole         | Antifungal          | 329744-44-7 |      | C <sub>27</sub> H <sub>25</sub> F <sub>3</sub> N <sub>4</sub> O <sub>5</sub> S |
| Embramine            | Antihistaminic      | 3565-72-8   |      | C <sub>18</sub> H <sub>22</sub> BrNO                                           |
| Embusartan           | Antihypertensive    | 156001-18-2 |      | C <sub>25</sub> H <sub>24</sub> FN <sub>3</sub> O <sub>3</sub>                 |
| Embutramide          | Anesthetic          | 15687-14-6  |      | C <sub>17</sub> H <sub>27</sub> NO <sub>3</sub>                                |
| Emedastine           | Antihistaminic      | 87233-61-2  | Y    | C <sub>17</sub> H <sub>26</sub> N <sub>4</sub> O                               |
| Emetine              | Antiamoebic         | 483-18-1    |      | C <sub>29</sub> H <sub>40</sub> N <sub>2</sub> O <sub>4</sub>                  |
| Emideltide           | Unclassified        | 62568-57-4  |      | C <sub>35</sub> H <sub>48</sub> N <sub>10</sub> O <sub>15</sub>                |
| Emiglitate           | Antidiabetic        | 80879-63-6  |      | C <sub>17</sub> H <sub>25</sub> NO <sub>7</sub>                                |
| Emilium Tosylate     | Antiarrhythmic      | 30716-01-9  |      | C <sub>19</sub> H <sub>27</sub> NO <sub>4</sub> S                              |
| Emitefur             | Antineoplastic      | 110690-43-2 |      | C <sub>28</sub> H <sub>19</sub> FN <sub>4</sub> O <sub>8</sub>                 |
| Emivirine            | Antiviral           | 149950-60-7 |      | C <sub>17</sub> H <sub>22</sub> N <sub>2</sub> O <sub>3</sub>                  |
| Emopamil             | Vasodilator         | 78370-13-5  |      | C <sub>23</sub> H <sub>30</sub> N <sub>2</sub>                                 |
| Emorfazone           | Antiinflammatory    | 38957-41-4  |      | C <sub>11</sub> H <sub>17</sub> N <sub>3</sub> O <sub>3</sub>                  |
| Emylcamate           | Anxiolytic          | 78-28-4     |      | C <sub>7</sub> H <sub>15</sub> NO <sub>2</sub>                                 |
| Enadoline            | Analgesic           | 124378-77-4 |      | C <sub>24</sub> H <sub>32</sub> N <sub>2</sub> O <sub>3</sub>                  |
| Enalapril            | Antihypertensive    | 75847-73-3  | Y    | C <sub>20</sub> H <sub>28</sub> N <sub>2</sub> O <sub>5</sub>                  |
| Enalaprilat          | Antihypertensive    | 76420-72-9  |      | C <sub>18</sub> H <sub>24</sub> N <sub>2</sub> O <sub>5</sub>                  |
| Enalkiren            | Antihypertensive    | 113082-98-7 |      | C <sub>35</sub> H <sub>56</sub> N <sub>6</sub> O <sub>6</sub>                  |
| Enazadrem Phosphate  | Dermatologic        | 107361-33-1 |      | C <sub>18</sub> H <sub>25</sub> N <sub>3</sub> O                               |
| Enbucrilate          | Dermatologic        | 6606-65-1   |      | C <sub>8</sub> H <sub>11</sub> NO <sub>2</sub>                                 |
| Encainide            | Antiarrhythmic      | 66778-36-7  |      | C <sub>22</sub> H <sub>28</sub> N <sub>2</sub> O <sub>2</sub>                  |
| Enciprazine          | Anxiolytic          | 68576-86-3  |      | C <sub>23</sub> H <sub>32</sub> N <sub>2</sub> O <sub>6</sub>                  |
| Enclomiphene         | Steroid             | 15690-57-0  | Y    | C <sub>26</sub> H <sub>28</sub> ClNO                                           |
| Encyprate            | Antidepressant      | 2521-01-9   |      | C <sub>13</sub> H <sub>17</sub> NO <sub>2</sub>                                |
| Endixaprine          | Antineoplastic      | 93181-85-2  |      | C <sub>15</sub> H <sub>15</sub> Cl <sub>2</sub> N <sub>3</sub> O               |
| Endobenzyl Bromide   | Mydriatic           | 52080-56-5  |      | C <sub>20</sub> H <sub>28</sub> NO <sub>3</sub> .Br                            |
| Endomide             | Immunomodulator     | 4582-18-7   |      | C <sub>17</sub> H <sub>28</sub> N <sub>2</sub> O <sub>2</sub>                  |
| Endralazine Mesylate | Antihypertensive    | 39715-02-1  |      | C <sub>14</sub> H <sub>15</sub> N <sub>3</sub> O                               |
| Endrysone            | Antiinflammatory    | 35100-44-8  |      | C <sub>22</sub> H <sub>30</sub> O <sub>3</sub>                                 |
| Enecadin             | Nootropic           | 259525-01-4 |      | C <sub>21</sub> H <sub>28</sub> FN <sub>3</sub> O                              |
| Enefexine            | Antidepressant      | 67765-04-2  |      | C <sub>13</sub> H <sub>19</sub> N                                              |
| Enestebol            | Androgen            | 2320-86-7   |      | C <sub>20</sub> H <sub>28</sub> O <sub>3</sub>                                 |
| Enfenamic Acid       | Antiinflammatory    | 23049-93-6  |      | C <sub>15</sub> H <sub>15</sub> NO <sub>2</sub>                                |
| Enflurane            | Anesthetic          | 13838-16-9  |      | C <sub>3</sub> H <sub>2</sub> ClF <sub>5</sub> O                               |
| Englitzone Sodium    | Antidiabetic        | 109229-58-5 |      | C <sub>20</sub> H <sub>19</sub> NO <sub>3</sub> S                              |
| Eniclobrate          | Antihyperlipidemic  | 81126-88-7  |      | C <sub>24</sub> H <sub>24</sub> ClNO <sub>3</sub>                              |
| Enilconazole         | Antifungal          | 35554-44-0  |      | C <sub>14</sub> H <sub>14</sub> Cl <sub>2</sub> N <sub>2</sub> O               |
| Enilospirone         | Anxiolytic          | 59798-73-1  |      | C <sub>15</sub> H <sub>18</sub> ClNO <sub>3</sub>                              |
| Eniluracil           | Antineoplastic      | 59989-18-3  | Y    | C <sub>6</sub> H <sub>4</sub> N <sub>2</sub> O <sub>2</sub>                    |
| Eniporide            | Cardiotonic         | 176644-21-6 |      | C <sub>14</sub> H <sub>16</sub> N <sub>4</sub> O <sub>3</sub> S                |
| Enisoprost           | Anticlerative       | 81026-63-3  |      | C <sub>22</sub> H <sub>36</sub> O <sub>5</sub>                                 |
| Enocitabine          | Antineoplastic      | 55726-47-1  |      | C <sub>31</sub> H <sub>55</sub> N <sub>3</sub> O <sub>6</sub>                  |
| Enofelast            | Bronchodilator      | 125722-16-9 |      | C <sub>16</sub> H <sub>15</sub> FO                                             |
| Enolicam Sodium      | Antiinflammatory    | 59755-82-7  |      | C <sub>17</sub> H <sub>12</sub> Cl <sub>3</sub> NO <sub>4</sub> S              |
| Enoxacin             | Antibiotic          | 74011-58-8  | Y    | C <sub>15</sub> H <sub>17</sub> FN <sub>4</sub> O <sub>3</sub>                 |
| Enoxamast            | Antibacterial       | 74604-76-5  |      | C <sub>13</sub> H <sub>10</sub> N <sub>2</sub> O <sub>5</sub> S                |
| Enoximone            | Cardiotonic         | 77671-31-9  |      | C <sub>12</sub> H <sub>12</sub> N <sub>2</sub> O <sub>2</sub> S                |
| Enoxolone            | Antiinflammatory    | 471-53-4    |      | C <sub>30</sub> H <sub>46</sub> O <sub>4</sub>                                 |
| Enpiprazole          | Anxiolytic          | 31729-24-5  |      | C <sub>16</sub> H <sub>21</sub> ClN <sub>4</sub>                               |
| Enpiroline Phosphate | Antimalarial        | 66364-73-6  |      | C <sub>19</sub> H <sub>18</sub> F <sub>6</sub> N <sub>2</sub> O                |

Table S1. Cont.

| Common Name          | Indication       | CAS Number  | Oral | Molecular Formula                                                                             |
|----------------------|------------------|-------------|------|-----------------------------------------------------------------------------------------------|
| Enprazepine          | Anticonvulsant   | 47206-15-5  |      | C <sub>20</sub> H <sub>24</sub> N <sub>2</sub>                                                |
| Enprofylline         | Bronchodilator   | 41078-02-8  |      | C <sub>8</sub> H <sub>10</sub> N <sub>4</sub> O <sub>2</sub>                                  |
| Enpromate            | Antineoplastic   | 10087-89-5  |      | C <sub>22</sub> H <sub>23</sub> NO <sub>2</sub>                                               |
| Enprostil            | Antiulcerative   | 73121-56-9  |      | C <sub>23</sub> H <sub>26</sub> O <sub>6</sub>                                                |
| Enrasentan           | Anesthetic       | 167256-08-8 |      | C <sub>29</sub> H <sub>30</sub> O <sub>8</sub>                                                |
| Enrofloxacin         | Antibiotic       | 93106-60-6  |      | C <sub>19</sub> H <sub>22</sub> FN <sub>3</sub> O <sub>3</sub>                                |
| Ensaculin            | Nootropic        | 155773-59-4 |      | C <sub>26</sub> H <sub>32</sub> N <sub>2</sub> O <sub>5</sub>                                 |
| Ensulizole           | Dermatologic     | 27503-81-7  |      | C <sub>13</sub> H <sub>10</sub> N <sub>2</sub> O <sub>3</sub> S                               |
| Entacapone           | Antiparkinsonian | 130929-57-6 | Y    | C <sub>14</sub> H <sub>15</sub> N <sub>3</sub> O <sub>5</sub>                                 |
| Entecavir            | Antiviral        | 142217-69-4 | Y    | C <sub>12</sub> H <sub>15</sub> N <sub>5</sub> O <sub>3</sub>                                 |
| Enviomycin           | Antibiotic       | 33103-22-9  |      | C <sub>25</sub> H <sub>43</sub> N <sub>13</sub> O <sub>10</sub>                               |
| Enviradene           | Antiviral        | 80883-55-2  |      | C <sub>19</sub> H <sub>21</sub> N <sub>3</sub> O <sub>2</sub> S                               |
| Enviroxime           | Antiviral        | 72301-79-2  |      | C <sub>17</sub> H <sub>18</sub> N <sub>4</sub> O <sub>3</sub> S                               |
| Enzacamene           | Dermatologic     | 36861-47-9  |      | C <sub>18</sub> H <sub>22</sub> O                                                             |
| Enzastaurin          | Antineoplastic   | 170364-57-5 | Y    | C <sub>32</sub> H <sub>29</sub> N <sub>5</sub> O <sub>2</sub>                                 |
| Epalrestat           | Antidiabetic     | 82159-09-9  | Y    | C <sub>15</sub> H <sub>13</sub> NO <sub>3</sub> S <sub>2</sub>                                |
| Epanolol             | Antianginal      | 86880-51-5  |      | C <sub>20</sub> H <sub>23</sub> N <sub>3</sub> O <sub>4</sub>                                 |
| Eperezolid           | Antibacterial    | 165800-04-4 |      | C <sub>18</sub> H <sub>23</sub> FN <sub>4</sub> O <sub>5</sub>                                |
| Eperisone            | Muscle Relaxant  | 64840-90-0  |      | C <sub>17</sub> H <sub>25</sub> NO                                                            |
| Epervudine           | Antiviral        | 60136-25-6  |      | C <sub>12</sub> H <sub>18</sub> N <sub>2</sub> O <sub>5</sub>                                 |
| Ephedrine            | Bronchodilator   | 299-42-3    | Y    | C <sub>10</sub> H <sub>15</sub> NO                                                            |
| Ephedrine Camphorate | Antihypotensive  | 124-83-4    |      | C <sub>10</sub> H <sub>16</sub> O <sub>4</sub>                                                |
| Epicainide           | Antiarrhythmic   | 66304-03-8  |      | C <sub>21</sub> H <sub>26</sub> N <sub>2</sub> O <sub>2</sub>                                 |
| Epicillin            | Antibiotic       | 26774-90-3  |      | C <sub>16</sub> H <sub>21</sub> N <sub>3</sub> O <sub>4</sub> S                               |
| Epicriptine          | Pituitary        | 88660-47-3  |      | C <sub>32</sub> H <sub>43</sub> N <sub>5</sub> O <sub>5</sub>                                 |
| Epiestriol           | Steroid          | 547-81-9    |      | C <sub>18</sub> H <sub>24</sub> O <sub>3</sub>                                                |
| Epimestrol           | Pituitary        | 7004-98-0   |      | C <sub>19</sub> H <sub>26</sub> O <sub>3</sub>                                                |
| Epinastine           | Antihistaminic   | 80012-43-7  | Y    | C <sub>16</sub> H <sub>15</sub> N <sub>3</sub>                                                |
| Epinephrine          | Bronchodilator   | 51-43-4     |      | C <sub>9</sub> H <sub>13</sub> NO <sub>3</sub>                                                |
| Epinephryl Borate    | Adrenergic       | 5579-16-8   |      | C <sub>9</sub> H <sub>12</sub> BNO <sub>4</sub>                                               |
| Epipropidine         | Antineoplastic   | 5696-17-3   |      | C <sub>16</sub> H <sub>28</sub> N <sub>2</sub> O <sub>2</sub>                                 |
| Epirizole            | Analgesic        | 18694-40-1  |      | C <sub>11</sub> H <sub>14</sub> N <sub>4</sub> O <sub>2</sub>                                 |
| Epiroprim            | Antibiotic       | 73090-70-7  |      | C <sub>19</sub> H <sub>23</sub> N <sub>5</sub> O <sub>2</sub>                                 |
| Epirubicin           | Antineoplastic   | 56420-45-2  |      | C <sub>27</sub> H <sub>29</sub> NO <sub>11</sub>                                              |
| Epitetracycline      | Antibacterial    | 79-85-6     |      | C <sub>22</sub> H <sub>24</sub> N <sub>2</sub> O <sub>8</sub>                                 |
| Epithiazide          | Antihypertensive | 1764-85-8   |      | C <sub>10</sub> H <sub>11</sub> ClF <sub>3</sub> N <sub>3</sub> O <sub>4</sub> S <sub>3</sub> |
| Epitiostanol         | Antineoplastic   | 2363-58-8   |      | C <sub>19</sub> H <sub>30</sub> OS                                                            |
| Eplerenone           | Antihypertensive | 107724-20-9 | Y    | C <sub>24</sub> H <sub>30</sub> O <sub>6</sub>                                                |
| Eplivanserin         | Anxiolytic       | 130579-75-8 |      | C <sub>19</sub> H <sub>21</sub> FN <sub>2</sub> O <sub>2</sub>                                |
| Epoprostenol         | Antithrombotic   | 35121-78-9  |      | C <sub>20</sub> H <sub>32</sub> O <sub>5</sub>                                                |
| Epostane             | Oxytocic         | 80471-63-2  |      | C <sub>22</sub> H <sub>31</sub> NO <sub>3</sub>                                               |
| Eprazinone           | Antitussive      | 10402-90-1  |      | C <sub>24</sub> H <sub>32</sub> N <sub>2</sub> O <sub>2</sub>                                 |
| Epristeride          | Steroid          | 119169-78-7 |      | C <sub>25</sub> H <sub>37</sub> NO <sub>3</sub>                                               |
| Eprobemide           | Antiparkinsonian | 87940-60-1  |      | C <sub>14</sub> H <sub>19</sub> ClN <sub>2</sub> O <sub>2</sub>                               |
| Eprodissate Disodium | Nootropic        | 21668-77-9  | Y    | C <sub>3</sub> H <sub>8</sub> O <sub>6</sub> S <sub>2</sub>                                   |
| Eprosartan           | Antihypertensive | 133040-01-4 | Y    | C <sub>23</sub> H <sub>24</sub> N <sub>2</sub> O <sub>4</sub> S                               |
| Eprovafen            | Antidepressant   | 101335-99-3 |      | C <sub>18</sub> H <sub>22</sub> O <sub>2</sub> S                                              |
| Eproxindine          | Antiarrhythmic   | 85793-29-9  |      | C <sub>23</sub> H <sub>29</sub> N <sub>3</sub> O <sub>3</sub>                                 |
| Eprozinol            | Bronchodilator   | 32665-36-4  |      | C <sub>22</sub> H <sub>30</sub> N <sub>2</sub> O <sub>2</sub>                                 |
| Epsiprantel          | Anthelmintic     | 98123-83-2  |      | C <sub>20</sub> H <sub>26</sub> N <sub>2</sub> O <sub>2</sub>                                 |
| Eptaloprost          | Prostaglandin    | 90693-76-8  |      | C <sub>24</sub> H <sub>34</sub> O <sub>5</sub>                                                |
| Eptapirone           | Anxiolytic       | 179756-58-2 |      | C <sub>16</sub> H <sub>23</sub> N <sub>7</sub> O <sub>2</sub>                                 |
| Eptastigmine         | Cholinergic      | 101246-68-8 |      | C <sub>21</sub> H <sub>33</sub> N <sub>3</sub> O <sub>2</sub>                                 |
| Eptazocine           | Analgesic        | 72522-13-5  |      | C <sub>15</sub> H <sub>21</sub> NO                                                            |
| Eptifibatide         | Antithrombotic   | 188627-80-7 |      | C <sub>35</sub> H <sub>49</sub> N <sub>11</sub> O <sub>5</sub> S <sub>2</sub>                 |
| Equilin              | Estrogen         | 474-86-2    |      | C <sub>18</sub> H <sub>20</sub> O <sub>2</sub>                                                |
| Erbulozole           | Antineoplastic   | 124784-31-2 |      | C <sub>24</sub> H <sub>27</sub> N <sub>3</sub> O <sub>5</sub> S                               |
| Erdosteine           | Mucolytic        | 84611-23-4  | Y    | C <sub>8</sub> H <sub>11</sub> NO <sub>4</sub> S <sub>2</sub>                                 |
| Ergonovine           | Antihypertensive | 60-79-7     | Y    | C <sub>19</sub> H <sub>23</sub> N <sub>3</sub> O <sub>2</sub>                                 |
| Ergotamine           | Analgesic        | 113-15-5    |      | C <sub>33</sub> H <sub>35</sub> N <sub>5</sub> O <sub>5</sub>                                 |
| Eriocolol            | Antihypertensive | 85320-67-8  |      | C <sub>18</sub> H <sub>24</sub> ClNO <sub>3</sub>                                             |
| Erizepine            | Anticonvulsant   | 96645-87-3  |      | C <sub>20</sub> H <sub>22</sub> N <sub>2</sub>                                                |
| Erlotinib            | Antineoplastic   | 183321-74-6 | Y    | C <sub>22</sub> H <sub>23</sub> N <sub>3</sub> O <sub>4</sub>                                 |

Table S1. Cont.

| Common Name                 | Indication           | CAS Number  | Oral | Molecular Formula                                                 |
|-----------------------------|----------------------|-------------|------|-------------------------------------------------------------------|
| Erocainide                  | Antiarrhythmic       | 85750-38-5  |      | C <sub>22</sub> H <sub>33</sub> ClN <sub>2</sub> O                |
| Ersentilide                 | Antiarrhythmic       | 125279-79-0 |      | C <sub>21</sub> H <sub>26</sub> N <sub>4</sub> O <sub>5</sub> S   |
| Ertapenem                   | Antibacterial        | 153832-46-3 |      | C <sub>22</sub> H <sub>25</sub> N <sub>3</sub> O <sub>7</sub> S   |
| Ertiprotafib                | Antidiabetic         | 251303-04-5 |      | C <sub>31</sub> H <sub>27</sub> BrO <sub>3</sub> S                |
| Erythrityl Tetranitrate     | Vasodilator          | 7297-25-8   |      | C <sub>4</sub> H <sub>6</sub> N <sub>4</sub> O <sub>12</sub>      |
| Erythromycin                | Antibiotic           | 114-07-8    | Y    | C <sub>37</sub> H <sub>67</sub> NO <sub>13</sub>                  |
| Erythromycin Acistrate      | Antibiotic           | 992-69-8    |      | C <sub>39</sub> H <sub>69</sub> NO <sub>14</sub>                  |
| Erythromycin Ethylsuccinate | Antibiotic           | 1264-62-6   | Y    | C <sub>43</sub> H <sub>75</sub> NO <sub>16</sub>                  |
| Erythromycin Propionate     | Antibiotic           | 134-36-1    |      | C <sub>40</sub> H <sub>71</sub> NO <sub>14</sub>                  |
| Erythromycin Salnacedin     | Antibiotic           | 87573-04-4  |      | C <sub>12</sub> H <sub>13</sub> NO <sub>5</sub> S                 |
| Esafloxacin                 | Antibiotic           | 129672-09-9 |      | C <sub>15</sub> H <sub>17</sub> FN <sub>4</sub> O <sub>3</sub>    |
| Esaprazole                  | Antiulcerative       | 64204-55-3  |      | C <sub>12</sub> H <sub>23</sub> N <sub>3</sub> O                  |
| Esatenolol                  | Adrenergic           | 93379-54-5  |      | C <sub>14</sub> H <sub>22</sub> N <sub>2</sub> O <sub>3</sub>     |
| Escitalopram Oxalate        | Antidepressant       | 128196-01-0 | Y    | C <sub>20</sub> H <sub>21</sub> FN <sub>2</sub> O                 |
| Esculamine                  | Antiinflammatory     | 2908-75-0   |      | C <sub>15</sub> H <sub>19</sub> NO <sub>6</sub>                   |
| Esculin                     | Dermatologic         | 531-75-9    |      | C <sub>15</sub> H <sub>16</sub> O <sub>9</sub>                    |
| Eseridine                   | Cholinergic          | 25573-43-7  |      | C <sub>15</sub> H <sub>21</sub> N <sub>3</sub> O <sub>3</sub>     |
| Esflurbiprofen              | Antiinflammatory     | 51543-39-6  |      | C <sub>15</sub> H <sub>13</sub> FO <sub>2</sub>                   |
| Esketamine                  | Sedative             | 33643-46-8  |      | C <sub>13</sub> H <sub>16</sub> ClNO                              |
| Eslicarbazepine             | Antipsychotic        | 104746-04-5 | Y    | C <sub>15</sub> H <sub>14</sub> N <sub>2</sub> O <sub>2</sub>     |
| Esmirtazapine               | Antidepressant       | 61337-87-9  |      | C <sub>17</sub> H <sub>19</sub> N <sub>3</sub>                    |
| Esmolol                     | Antiarrhythmic       | 81147-92-4  |      | C <sub>16</sub> H <sub>25</sub> NO <sub>4</sub>                   |
| Esomeprazole                | Antiulcerative       | 119141-88-7 | Y    | C <sub>17</sub> H <sub>19</sub> N <sub>3</sub> O <sub>3</sub> S   |
| Esonarimod                  | Antiarrhythmic       | 101973-77-7 |      | C <sub>14</sub> H <sub>16</sub> O <sub>4</sub> S                  |
| Esorubicin                  | Antineoplastic       | 63521-85-7  |      | C <sub>27</sub> H <sub>29</sub> NO <sub>10</sub>                  |
| Esoxybutynin Chloride       | Antispasmodic        | 119618-22-3 |      | C <sub>22</sub> H <sub>31</sub> NO <sub>3</sub>                   |
| Espatropate                 | Bronchodilator       | 132829-83-5 |      | C <sub>19</sub> H <sub>23</sub> N <sub>3</sub> O <sub>3</sub>     |
| Esproquin                   | Adrenergic           | 37517-33-2  |      | C <sub>14</sub> H <sub>21</sub> NOS                               |
| Estazolam                   | Sedative             | 29975-16-4  | Y    | C <sub>16</sub> H <sub>11</sub> ClN <sub>4</sub>                  |
| Estradiol                   | Estrogen             | 50-28-2     | Y    | C <sub>18</sub> H <sub>24</sub> O <sub>2</sub>                    |
| Estradiol 17 Propionate     | Estrogen             | 3758-34-7   | Y    | C <sub>21</sub> H <sub>28</sub> O <sub>3</sub>                    |
| Estradiol Acetate           | Estrogen             | 4245-41-4   |      | C <sub>20</sub> H <sub>26</sub> O <sub>3</sub>                    |
| Estradiol Benzoate          | Estrogen             | 50-50-0     |      | C <sub>25</sub> H <sub>28</sub> O <sub>3</sub>                    |
| Estradiol Cypionate         | Estrogen             | 313-06-4    |      | C <sub>26</sub> H <sub>36</sub> O <sub>3</sub>                    |
| Estradiol Dipropionate      | Estrogen             | 113-38-2    |      | C <sub>24</sub> H <sub>32</sub> O <sub>4</sub>                    |
| Estradiol Enanthate         | Estrogen             | 4956-37-0   |      | C <sub>25</sub> H <sub>36</sub> O <sub>3</sub>                    |
| Estradiol Undecylate        | Estrogen             | 3571-53-7   |      | C <sub>29</sub> H <sub>44</sub> O <sub>3</sub>                    |
| Estradiol Valerate          | Estrogen             | 979-32-8    | Y    | C <sub>23</sub> H <sub>32</sub> O <sub>3</sub>                    |
| Estramustine                | Antineoplastic       | 2998-57-4   | Y    | C <sub>23</sub> H <sub>31</sub> Cl <sub>2</sub> NO <sub>3</sub>   |
| Estramustine Phosphate      | Antineoplastic       | 4891-15-0   |      | C <sub>23</sub> H <sub>32</sub> Cl <sub>2</sub> NO <sub>6</sub> P |
| Estrapronicate              | Estrogen             | 4140-20-9   |      | C <sub>27</sub> H <sub>31</sub> NO <sub>4</sub>                   |
| Estrazolinol Hydrobromide   | Estrogen             | 5941-36-6   |      | C <sub>20</sub> H <sub>25</sub> NO <sub>2</sub>                   |
| Estriol                     | Estrogen             | 50-27-1     | Y    | C <sub>18</sub> H <sub>24</sub> O <sub>3</sub>                    |
| Estrofurate                 | Estrogen             | 10322-73-3  |      | C <sub>24</sub> H <sub>26</sub> O <sub>4</sub>                    |
| Estrone                     | Estrogen             | 53-16-7     |      | C <sub>18</sub> H <sub>22</sub> O <sub>2</sub>                    |
| Estrone Sodium Sulfate      | Estrogen             | 481-97-0    | Y    | C <sub>18</sub> H <sub>22</sub> O <sub>5</sub> S                  |
| Esuprone                    | Anticonvulsant       | 91406-11-0  |      | C <sub>13</sub> H <sub>14</sub> O <sub>5</sub> S                  |
| Eszopiclone                 | Anxiolytic           | 138729-47-2 | Y    | C <sub>17</sub> H <sub>17</sub> ClN <sub>6</sub> O <sub>3</sub>   |
| Etabenzarone                | Capillary Protectant | 15686-63-2  |      | C <sub>23</sub> H <sub>27</sub> NO <sub>3</sub>                   |
| Etacepride                  | Antiprotozoal        | 68788-56-7  |      | C <sub>17</sub> H <sub>24</sub> N <sub>2</sub> O <sub>3</sub>     |
| Etafedrine                  | Adrenergic           | 7681-79-0   |      | C <sub>12</sub> H <sub>19</sub> NO                                |
| Etafenone                   | Vasodilator          | 90-54-0     |      | C <sub>21</sub> H <sub>27</sub> NO <sub>2</sub>                   |
| Etalocib                    | Antineoplastic       | 161172-51-6 |      | C <sub>33</sub> H <sub>33</sub> FO <sub>6</sub>                   |
| Etaminile                   | Antitussive          | 15599-27-6  |      | C <sub>15</sub> H <sub>22</sub> N <sub>2</sub>                    |
| Etamiphyllin                | Bronchodilator       | 314-35-2    |      | C <sub>13</sub> H <sub>21</sub> N <sub>5</sub> O <sub>2</sub>     |
| Etanidazole                 | Antineoplastic       | 22668-01-5  |      | C <sub>7</sub> H <sub>10</sub> N <sub>4</sub> O <sub>4</sub>      |
| Etanterol                   | Bronchodilator       | 93047-39-3  |      | C <sub>18</sub> H <sub>24</sub> N <sub>2</sub> O <sub>3</sub>     |
| Etaqualone                  | Sedative             | 7432-25-9   |      | C <sub>17</sub> H <sub>16</sub> N <sub>2</sub> O                  |
| Etarotene                   | Dermatologic         | 87719-32-2  |      | C <sub>25</sub> H <sub>32</sub> O <sub>2</sub> S                  |
| Etasuline                   | Antiarrhythmic       | 16781-39-8  |      | C <sub>16</sub> H <sub>15</sub> ClN <sub>2</sub> S                |
| Etazepine                   | Anticonvulsant       | 88124-27-0  |      | C <sub>17</sub> H <sub>17</sub> NO <sub>2</sub>                   |
| Etazolate                   | Antipsychotic        | 51022-77-6  | Y    | C <sub>14</sub> H <sub>19</sub> N <sub>5</sub> O <sub>2</sub>     |
| Etebenecid                  | Uricosuric           | 1213-06-5   |      | C <sub>11</sub> H <sub>15</sub> NO <sub>4</sub> S                 |

Table S1. Cont.

| Common Name                | Indication                | CAS Number  | Oral | Molecular Formula                                                             |
|----------------------------|---------------------------|-------------|------|-------------------------------------------------------------------------------|
| Eterobarb                  | Anticonvulsant            | 27511-99-5  |      | C <sub>16</sub> H <sub>20</sub> N <sub>2</sub> O <sub>5</sub>                 |
| Etersalate                 | Analgesic                 | 62992-61-4  |      | C <sub>19</sub> H <sub>19</sub> NO <sub>6</sub>                               |
| Ethacrynic Acid            | Diuretic                  | 58-54-8     | Y    | C <sub>13</sub> H <sub>12</sub> Cl <sub>2</sub> O <sub>4</sub>                |
| Ethambutol                 | Antibacterial             | 74-55-5     | Y    | C <sub>10</sub> H <sub>24</sub> N <sub>2</sub> O <sub>2</sub>                 |
| Ethamivan                  | Nootropic                 | 304-84-7    |      | C <sub>12</sub> H <sub>17</sub> NO <sub>3</sub>                               |
| 1,2-Ethanedisulfonic Acid  | Sedative                  | 110-04-3    | Y    | C <sub>2</sub> H <sub>6</sub> O <sub>6</sub> S <sub>2</sub>                   |
| Ethanolamine Hydrofluoride | Dermatologic              | 111-42-2    |      | C <sub>4</sub> H <sub>11</sub> NO <sub>2</sub>                                |
| Ethaverine                 | Antispasmodic             | 486-47-5    |      | C <sub>24</sub> H <sub>29</sub> NO <sub>4</sub>                               |
| Ethchlorvynol              | Sedative                  | 113-18-8    | Y    | C <sub>7</sub> H <sub>9</sub> ClO                                             |
| Ethenzamide                | Analgesic                 | 938-73-8    |      | C <sub>9</sub> H <sub>11</sub> NO <sub>2</sub>                                |
| Ether                      | Anesthetic                | 60-29-7     |      | C <sub>4</sub> H <sub>10</sub> O                                              |
| Ethiazide                  | Diuretic                  | 1824-58-4   | Y    | C <sub>9</sub> H <sub>12</sub> ClN <sub>3</sub> O <sub>4</sub> S <sub>2</sub> |
| Ethinamate                 | Sedative                  | 126-52-3    | Y    | C <sub>9</sub> H <sub>13</sub> NO <sub>2</sub>                                |
| Ethinyl Estradiol          | Estrogen                  | 57-63-6     | Y    | C <sub>20</sub> H <sub>24</sub> O <sub>2</sub>                                |
| Ethionamide                | Antibacterial             | 536-33-4    | Y    | C <sub>8</sub> H <sub>10</sub> N <sub>2</sub> S                               |
| Ethisterone                | Progestogen               | 434-03-7    |      | C <sub>21</sub> H <sub>28</sub> O <sub>2</sub>                                |
| Ethoheptazine Citrate      | Analgesic                 | 77-15-6     |      | C <sub>16</sub> H <sub>23</sub> NO <sub>2</sub>                               |
| Ethomoxane                 | Sedative                  | 3570-46-5   |      | C <sub>15</sub> H <sub>23</sub> NO <sub>3</sub>                               |
| Ethonam Nitrate            | Antifungal                | 15037-44-2  |      | C <sub>16</sub> H <sub>18</sub> N <sub>2</sub> O <sub>2</sub>                 |
| Ethopabate                 | Antibacterial             | 59-06-3     |      | C <sub>12</sub> H <sub>15</sub> NO <sub>4</sub>                               |
| Ethopropazine              | Antiparkinsonian          | 522-00-9    |      | C <sub>19</sub> H <sub>25</sub> ClN <sub>2</sub> S                            |
| Ethosuximide               | Anticonvulsant            | 77-67-8     | Y    | C <sub>7</sub> H <sub>11</sub> NO <sub>2</sub>                                |
| Ethotoin                   | Anticonvulsant            | 86-35-1     | Y    | C <sub>11</sub> H <sub>12</sub> N <sub>2</sub> O <sub>2</sub>                 |
| Ethoxazene                 | Analgesic                 | 94-10-0     |      | C <sub>14</sub> H <sub>16</sub> N <sub>4</sub> O                              |
| Ethoxazurutoside           | Cardiotonic               | 30851-76-4  |      | C <sub>33</sub> H <sub>41</sub> NO <sub>17</sub>                              |
| Ethoxzolamide              | Diuretic                  | 452-35-7    | Y    | C <sub>9</sub> H <sub>10</sub> N <sub>2</sub> O <sub>3</sub> S <sub>2</sub>   |
| Ethybenztropine            | Antibacterial             | 524-83-4    |      | C <sub>22</sub> H <sub>27</sub> NO                                            |
| Ethyl Biscoumacetate       | Anticoagulant             | 548-00-5    |      | C <sub>22</sub> H <sub>16</sub> O <sub>8</sub>                                |
| Ethyl Carfluzepate         | Anxiolytic                | 65400-85-3  |      | C <sub>20</sub> H <sub>17</sub> ClFN <sub>3</sub> O <sub>4</sub>              |
| Ethyl Chloride             | Anesthetic                | 75-00-3     |      | C <sub>2</sub> H <sub>5</sub> Cl                                              |
| Ethyl Dibunate             | Antitussive               | 5560-69-0   |      | C <sub>20</sub> H <sub>28</sub> O <sub>3</sub> S                              |
| Ethyl Dirazepate           | Anxiolytic                | 23980-14-5  |      | C <sub>18</sub> H <sub>14</sub> Cl <sub>2</sub> N <sub>2</sub> O <sub>3</sub> |
| Ethyl Linoleate            | Prostaglandin             | 544-35-4    |      | C <sub>20</sub> H <sub>36</sub> O <sub>2</sub>                                |
| Ethyl Loflazepate          | Anxiolytic                | 29177-84-2  | Y    | C <sub>18</sub> H <sub>14</sub> ClFN <sub>3</sub> O <sub>3</sub>              |
| Ethyl Nitrite [Spirit]     | Antihypertensive          | 109-95-5    |      | C <sub>2</sub> H <sub>5</sub> NO <sub>2</sub>                                 |
| Ethyl Pyrophosphate        | Unclassified              | 20680-55-1  |      | C <sub>6</sub> H <sub>16</sub> O <sub>7</sub> P <sub>2</sub>                  |
| Ethyl Vinyl Ether          | Anesthetic                | 109-92-2    |      | C <sub>4</sub> H <sub>8</sub> O                                               |
| Ethylamine Oleate          | Dermatologic              | 112-80-1    |      | C <sub>18</sub> H <sub>34</sub> O <sub>2</sub>                                |
| Ethylamine                 | Dermatologic              | 75-04-7     |      | C <sub>2</sub> H <sub>7</sub> N                                               |
| Ethylenediamine            | Urologic                  | 107-15-3    | Y    | C <sub>2</sub> H <sub>8</sub> N <sub>2</sub>                                  |
| Ethylestrenol              | Steroid                   | 965-90-2    |      | C <sub>20</sub> H <sub>32</sub> O                                             |
| Ethylmethylthiambutene     | Analgesic                 | 441-61-2    |      | C <sub>15</sub> H <sub>19</sub> NS <sub>2</sub>                               |
| Ethylmorphine Methiodide   | Analgesic                 | 6696-59-9   |      | C <sub>20</sub> H <sub>26</sub> INO <sub>3</sub>                              |
| Ethylnorepinephrine        | Bronchodilator            | 536-24-3    |      | C <sub>10</sub> H <sub>15</sub> NO <sub>3</sub>                               |
| Ethylstibamine             | Antiprotozoal             | 554-76-7    |      | C <sub>6</sub> H <sub>8</sub> NO <sub>3</sub> Sb                              |
| Ethynerone                 | Progestogen               | 3124-93-4   |      | C <sub>20</sub> H <sub>23</sub> ClO <sub>2</sub>                              |
| Ethynodiol Diacetate       | Anesthetic                | 297-76-7    |      | C <sub>24</sub> H <sub>32</sub> O <sub>4</sub>                                |
| Ethypicone                 | Unclassified              | 467-90-3    |      | C <sub>10</sub> H <sub>15</sub> NO <sub>2</sub>                               |
| Etibendazole               | Anthelmintic              | 64420-40-2  |      | C <sub>18</sub> H <sub>16</sub> FN <sub>3</sub> O <sub>4</sub>                |
| Eticlopride                | Gastroprokinetic          | 84226-12-0  |      | C <sub>17</sub> H <sub>25</sub> ClN <sub>2</sub> O <sub>3</sub>               |
| Eticyclidine               | Antiparkinsonian          | 2201-15-2   |      | C <sub>14</sub> H <sub>21</sub> N                                             |
| Etidocaine                 | Anesthetic                | 36637-18-0  |      | C <sub>17</sub> H <sub>28</sub> N <sub>2</sub> O                              |
| Etidronate                 | Bone Resorption Inhibitor | 2809-21-4   | Y    | C <sub>2</sub> H <sub>8</sub> O <sub>7</sub> P <sub>2</sub>                   |
| Etifelmine                 | Antihypertensive          | 341-00-4    | Y    | C <sub>17</sub> H <sub>19</sub> N                                             |
| Etifoxine                  | Anxiolytic                | 21715-46-8  |      | C <sub>17</sub> H <sub>17</sub> ClN <sub>2</sub> O                            |
| Etilamfetamine             | Anorexic                  | 457-87-4    |      | C <sub>11</sub> H <sub>17</sub> N                                             |
| Etilefrine                 | Antihypotensive           | 709-55-7    |      | C <sub>10</sub> H <sub>15</sub> NO <sub>2</sub>                               |
| Etilefrine Pivalate        | Mydriatic                 | 100696-30-8 |      | C <sub>15</sub> H <sub>23</sub> NO <sub>3</sub>                               |
| Etilevodopa                | Antiparkinsonian          | 37178-37-3  |      | C <sub>11</sub> H <sub>15</sub> NO <sub>4</sub>                               |
| Etintidine                 | Antihistaminic            | 69539-53-3  |      | C <sub>12</sub> H <sub>16</sub> N <sub>6</sub> S                              |
| Etipirium Iodide           | Unclassified              | 3478-15-7   |      | C <sub>21</sub> H <sub>26</sub> INO <sub>3</sub>                              |
| Etiprednol Dicoacetate     | Antiinflammatory          | 199331-40-3 |      | C <sub>24</sub> H <sub>30</sub> Cl <sub>2</sub> O <sub>6</sub>                |
| Etiproston                 | Prostaglandin             | 59619-81-7  |      | C <sub>24</sub> H <sub>32</sub> O <sub>7</sub>                                |

Table S1. Cont.

| Common Name         | Indication         | CAS Number  | Oral | Molecular Formula                                                             |
|---------------------|--------------------|-------------|------|-------------------------------------------------------------------------------|
| Etiracetam          | Anticonvulsant     | 33996-58-6  |      | C <sub>8</sub> H <sub>14</sub> N <sub>2</sub> O <sub>2</sub>                  |
| Etiroxate           | Nootropic          | 17365-01-4  |      | C <sub>18</sub> H <sub>17</sub> I <sub>4</sub> NO <sub>4</sub>                |
| Etisazole           | Antifungal         | 7716-60-1   |      | C <sub>9</sub> H <sub>10</sub> N <sub>2</sub> S                               |
| Etisomicin          | Antibiotic         | 70639-48-4  |      | C <sub>20</sub> H <sub>39</sub> N <sub>5</sub> O <sub>7</sub>                 |
| Etisulergine        | Antimigraine       | 64795-23-9  |      | C <sub>19</sub> H <sub>28</sub> N <sub>4</sub> O <sub>2</sub> S               |
| Etizolam            | Anxiolytic         | 40054-69-1  | Y    | C <sub>17</sub> H <sub>15</sub> ClN <sub>4</sub> S                            |
| Etocarlide          | Antibiotic         | 1234-30-6   |      | C <sub>17</sub> H <sub>20</sub> N <sub>2</sub> O <sub>2</sub> S               |
| Etocrylene          | Dermatologic       | 5232-99-5   |      | C <sub>18</sub> H <sub>15</sub> NO <sub>2</sub>                               |
| Etodolac            | Antiinflammatory   | 41340-25-4  | Y    | C <sub>17</sub> H <sub>21</sub> NO <sub>3</sub>                               |
| Etodroxizine        | Sedative           | 17692-34-1  |      | C <sub>23</sub> H <sub>31</sub> ClN <sub>2</sub> O <sub>3</sub>               |
| Etofamide           | Antineoplastic     | 25287-60-9  |      | C <sub>19</sub> H <sub>20</sub> Cl <sub>2</sub> N <sub>2</sub> O <sub>5</sub> |
| Etofenamate         | Analgesic          | 30544-47-9  |      | C <sub>18</sub> H <sub>18</sub> F <sub>3</sub> NO <sub>4</sub>                |
| Etofenprox          | Antiinflammatory   | 80844-07-1  |      | C <sub>25</sub> H <sub>28</sub> O <sub>3</sub>                                |
| Etofibrate          | Antihyperlipidemic | 31637-97-5  | Y    | C <sub>18</sub> H <sub>18</sub> ClNO <sub>5</sub>                             |
| Etoformin           | Antidiabetic       | 45086-03-1  |      | C <sub>8</sub> H <sub>19</sub> N <sub>5</sub>                                 |
| Etofuradine         | Antianginal        | 17692-35-2  |      | C <sub>18</sub> H <sub>21</sub> N <sub>3</sub> O                              |
| Etofylline          | Bronchodilator     | 519-37-9    |      | C <sub>9</sub> H <sub>12</sub> N <sub>4</sub> O <sub>3</sub>                  |
| Etoglucid           | Antineoplastic     | 1954-28-5   |      | C <sub>12</sub> H <sub>22</sub> O <sub>6</sub>                                |
| Etolorex            | Anorexic           | 54063-36-4  |      | C <sub>12</sub> H <sub>18</sub> ClNO                                          |
| Etolotifen          | Antihistaminic     | 82140-22-5  |      | C <sub>24</sub> H <sub>29</sub> N <sub>4</sub> O <sub>5</sub>                 |
| Etoloxamine         | Antihistaminic     | 1157-87-5   |      | C <sub>19</sub> H <sub>25</sub> NO                                            |
| Etomidate           | Sedative           | 33125-97-2  |      | C <sub>14</sub> H <sub>16</sub> N <sub>2</sub> O <sub>2</sub>                 |
| Etomidoline         | Antispasmodic      | 21590-92-1  |      | C <sub>23</sub> H <sub>29</sub> N <sub>5</sub> O <sub>2</sub>                 |
| Etomoxir            | Cardiotonic        | 124083-20-1 |      | C <sub>17</sub> H <sub>23</sub> ClO <sub>4</sub>                              |
| Etonitazene         | Analgesic          | 911-65-9    |      | C <sub>22</sub> H <sub>28</sub> N <sub>4</sub> O <sub>3</sub>                 |
| Etonogestrel        | Prostaglandin      | 54048-10-1  |      | C <sub>22</sub> H <sub>28</sub> O <sub>2</sub>                                |
| Etoperidone         | Antidepressant     | 52942-31-1  |      | C <sub>19</sub> H <sub>28</sub> ClN <sub>5</sub> O                            |
| Etoposide           | Antineoplastic     | 33419-42-0  |      | C <sub>29</sub> H <sub>32</sub> O <sub>13</sub>                               |
| Etoposide Phosphate | Antineoplastic     | 117091-64-2 |      | C <sub>29</sub> H <sub>33</sub> O <sub>16</sub> P                             |
| Etoprindole         | Nootropic          | 54063-37-5  |      | C <sub>15</sub> H <sub>21</sub> N <sub>3</sub> O                              |
| Etoprine            | Antineoplastic     | 18588-57-3  |      | C <sub>12</sub> H <sub>12</sub> Cl <sub>2</sub> N <sub>4</sub>                |
| Etoricoxib          | Antiinflammatory   | 202409-33-4 | Y    | C <sub>18</sub> H <sub>15</sub> ClN <sub>2</sub> O <sub>2</sub> S             |
| Etorphine           | Analgesic          | 14521-96-1  |      | C <sub>25</sub> H <sub>33</sub> NO <sub>4</sub>                               |
| Etosalamide         | Antifungal         | 15302-15-5  |      | C <sub>11</sub> H <sub>15</sub> NO <sub>3</sub>                               |
| Etoxadrol           | Anesthetic         | 28189-85-7  |      | C <sub>16</sub> H <sub>23</sub> NO <sub>2</sub>                               |
| Etoxidrine          | Analgesic          | 469-82-9    |      | C <sub>18</sub> H <sub>27</sub> NO <sub>4</sub>                               |
| Etozolin            | Diuretic           | 73-09-6     | Y    | C <sub>13</sub> H <sub>20</sub> N <sub>2</sub> O <sub>3</sub> S               |
| Etrabamine          | Antidepressant     | 70590-58-8  |      | C <sub>8</sub> H <sub>12</sub> N <sub>2</sub> S                               |
| Etravirine          | Antiviral          | 269055-15-4 | Y    | C <sub>20</sub> H <sub>15</sub> BrN <sub>6</sub> O                            |
| Etretinate          | Dermatologic       | 54350-48-0  |      | C <sub>23</sub> H <sub>30</sub> O <sub>3</sub>                                |
| Etriguat            | Vasodilator        | 402595-29-3 |      | C <sub>22</sub> H <sub>16</sub> FN <sub>7</sub>                               |
| Etryptamine Acetate | Nootropic          | 2235-90-7   |      | C <sub>12</sub> H <sub>16</sub> N <sub>2</sub>                                |
| Etymemazine         | Antihistaminic     | 523-54-6    |      | C <sub>20</sub> H <sub>26</sub> N <sub>2</sub> S                              |
| Eucaïne             | Analgesic          | 500-34-5    |      | C <sub>15</sub> H <sub>21</sub> NO <sub>2</sub>                               |
| Eucatropine         | Mydriatic          | 100-91-4    |      | C <sub>17</sub> H <sub>25</sub> NO <sub>3</sub>                               |
| Eugenol             | Analgesic          | 97-53-0     |      | C <sub>10</sub> H <sub>12</sub> O <sub>2</sub>                                |
| Euprocín            | Anesthetic         | 1301-42-4   |      | C <sub>24</sub> H <sub>34</sub> N <sub>2</sub> O <sub>2</sub>                 |
| Evandamine          | Antineoplastic     | 100035-75-4 |      | C <sub>11</sub> H <sub>16</sub> N <sub>4</sub> S                              |
| Everolimus          | Immunosuppressant  | 159351-69-6 | Y    | C <sub>53</sub> H <sub>83</sub> NO <sub>14</sub>                              |
| Exalamide           | Antifungal         | 53370-90-4  |      | C <sub>13</sub> H <sub>19</sub> NO <sub>2</sub>                               |
| Examorelin          | Cardiotonic        | 140703-51-1 |      | C <sub>47</sub> H <sub>58</sub> N <sub>12</sub> O <sub>6</sub>                |
| Exaprolol           | Adrenergic         | 55837-19-9  |      | C <sub>18</sub> H <sub>29</sub> NO <sub>2</sub>                               |
| Exatecan            | Antineoplastic     | 171335-80-1 |      | C <sub>24</sub> H <sub>22</sub> FN <sub>3</sub> O <sub>4</sub>                |
| Exemestane          | Antineoplastic     | 107868-30-4 | Y    | C <sub>20</sub> H <sub>24</sub> O <sub>2</sub>                                |
| Exepanol            | Antianginal        | 77416-65-0  |      | C <sub>11</sub> H <sub>15</sub> NO <sub>2</sub>                               |
| Exifone             | Nootropic          | 52479-85-3  |      | C <sub>13</sub> H <sub>10</sub> O <sub>7</sub>                                |
| Exiproben           | Choleretic         | 26281-69-6  |      | C <sub>16</sub> H <sub>24</sub> O <sub>5</sub>                                |
| Exisulind           | Antineoplastic     | 59973-80-7  |      | C <sub>20</sub> H <sub>17</sub> FO <sub>4</sub> S                             |
| Ezetimibe           | Antihyperlipidemic | 163222-33-1 | Y    | C <sub>24</sub> H <sub>21</sub> F <sub>2</sub> NO <sub>3</sub>                |
| Ezlopítant          | Antiemetic         | 147116-64-1 | Y    | C <sub>31</sub> H <sub>38</sub> N <sub>2</sub> O                              |
| Fabesetron          | Antiemetic         | 129300-27-2 |      | C <sub>18</sub> H <sub>19</sub> N <sub>3</sub> O                              |
| Fadolmidine         | Antidiabetic       | 189353-31-9 |      | C <sub>13</sub> H <sub>14</sub> N <sub>2</sub> O                              |
| Fadrozole           | Antineoplastic     | 102676-47-1 | Y    | C <sub>14</sub> H <sub>13</sub> N <sub>3</sub>                                |



Table S1. Cont.

| Common Name            | Indication       | CAS Number  | Oral | Molecular Formula                                                              |
|------------------------|------------------|-------------|------|--------------------------------------------------------------------------------|
| Falintolol             | Antihypertensive | 90581-63-8  |      | C <sub>12</sub> H <sub>24</sub> N <sub>2</sub> O <sub>2</sub>                  |
| Falipamil              | Antianginal      | 77862-92-1  |      | C <sub>24</sub> H <sub>32</sub> N <sub>2</sub> O <sub>5</sub>                  |
| Falnidamol             | Antineoplastic   | 196612-93-8 |      | C <sub>18</sub> H <sub>19</sub> ClFN <sub>7</sub>                              |
| Famciclovir            | Antiviral        | 104227-87-4 | Y    | C <sub>14</sub> H <sub>19</sub> N <sub>5</sub> O <sub>4</sub>                  |
| Famiraprinium Chloride | Unclassified     | 105538-42-9 |      | C <sub>15</sub> H <sub>17</sub> N <sub>3</sub> O <sub>2</sub>                  |
| Famotidine             | Ant ulcerative   | 76824-35-6  | Y    | C <sub>8</sub> H <sub>15</sub> N <sub>7</sub> O <sub>2</sub> S <sub>3</sub>    |
| Fampridine             | Nootropic        | 504-24-5    | Y    | C <sub>5</sub> H <sub>6</sub> N <sub>2</sub>                                   |
| Famprofazone           | Analgesic        | 22881-35-2  |      | C <sub>24</sub> H <sub>31</sub> N <sub>3</sub> O                               |
| Famproniil             | Unclassified     | 134183-95-2 |      | C <sub>16</sub> H <sub>6</sub> Cl <sub>3</sub> F <sub>3</sub> N <sub>6</sub>   |
| Fananserin             | Antipsychotic    | 127625-29-0 |      | C <sub>23</sub> H <sub>24</sub> FN <sub>3</sub> O <sub>2</sub> S               |
| Fanapanel              | Nootropic        | 161605-73-8 |      | C <sub>14</sub> H <sub>15</sub> F <sub>3</sub> N <sub>3</sub> O <sub>6</sub> P |
| Fandofloxacin          | Antibiotic       | 164150-99-6 |      | C <sub>20</sub> H <sub>18</sub> F <sub>2</sub> N <sub>4</sub> O <sub>3</sub>   |
| Fandosentan Potassium  | Anticoagulant    | 221241-63-0 |      | C <sub>25</sub> H <sub>18</sub> F <sub>3</sub> N <sub>6</sub> O <sub>6</sub> S |
| Fanetizole Mesylate    | Immunomodulator  | 79069-94-6  |      | C <sub>17</sub> H <sub>16</sub> N <sub>2</sub> S                               |
| Fantofarone            | Antihypertensive | 114432-13-2 |      | C <sub>31</sub> H <sub>38</sub> N <sub>2</sub> O <sub>5</sub> S                |
| Fantridone             | Antidepressant   | 17692-37-4  |      | C <sub>18</sub> H <sub>20</sub> N <sub>2</sub> O                               |
| Farampator             | Antipsychotic    | 211735-76-1 |      | C <sub>12</sub> H <sub>13</sub> N <sub>3</sub> O <sub>2</sub>                  |
| Farglitazar            | Antidiabetic     | 196808-45-4 |      | C <sub>34</sub> H <sub>30</sub> N <sub>2</sub> O <sub>5</sub>                  |
| Fasidotril             | Antihypertensive | 135038-57-2 |      | C <sub>23</sub> H <sub>25</sub> NO <sub>6</sub> S                              |
| Fasiplon               | Anxiolytic       | 106100-65-6 |      | C <sub>13</sub> H <sub>15</sub> N <sub>5</sub> O <sub>2</sub>                  |
| Fasoracetam            | Nootropic        | 110958-19-5 |      | C <sub>10</sub> H <sub>16</sub> N <sub>2</sub> O <sub>2</sub>                  |
| Fasudil                | Vasodilator      | 103745-39-7 | y    | C <sub>14</sub> H <sub>17</sub> N <sub>3</sub> O <sub>2</sub> S                |
| Fazadinium Bromide     | Muscle Relaxant  | 49564-56-9  |      | C <sub>28</sub> H <sub>24</sub> Br <sub>2</sub> N <sub>6</sub>                 |
| Fazarabine             | Antineoplastic   | 65886-71-7  |      | C <sub>8</sub> H <sub>12</sub> N <sub>4</sub> O <sub>5</sub>                   |
| Febantel               | Anthelminthic    | 58306-30-2  |      | C <sub>20</sub> H <sub>22</sub> N <sub>4</sub> O <sub>6</sub> S                |
| Febarbamate            | Antidepressant   | 13246-02-1  |      | C <sub>20</sub> H <sub>27</sub> N <sub>3</sub> O <sub>6</sub>                  |
| Febuprol               | Choleretic       | 3102-00-9   |      | C <sub>13</sub> H <sub>20</sub> O <sub>3</sub>                                 |
| Febuverine             | Anesthetic       | 7077-33-0   |      | C <sub>28</sub> H <sub>38</sub> N <sub>2</sub> O <sub>4</sub>                  |
| Febuxostat             | Antiurolithic    | 144060-53-7 | y    | C <sub>16</sub> H <sub>16</sub> N <sub>2</sub> O <sub>5</sub> S                |
| Feclimine              | Unclassified     | 3590-16-7   |      | C <sub>24</sub> H <sub>42</sub> N <sub>2</sub>                                 |
| Feclobuzone            | Antirheumatic    | 23111-34-4  |      | C <sub>27</sub> H <sub>25</sub> ClN <sub>2</sub> O <sub>4</sub>                |
| Fedotozine             | Gastroprokinetic | 123618-00-8 |      | C <sub>22</sub> H <sub>31</sub> NO <sub>4</sub>                                |
| Fedrilate              | Antiviral        | 23271-74-1  |      | C <sub>20</sub> H <sub>29</sub> NO <sub>4</sub>                                |
| Felbamate              | Anticonvulsant   | 25451-15-4  | Y    | C <sub>11</sub> H <sub>14</sub> N <sub>2</sub> O <sub>4</sub>                  |
| Felbinac               | Antiinflammatory | 5728-52-9   |      | C <sub>14</sub> H <sub>12</sub> O <sub>2</sub>                                 |
| Felipyrine             | Antiinflammatory | 1980-49-0   |      | C <sub>15</sub> H <sub>20</sub> N <sub>2</sub> O                               |
| Felodipine             | Antihypertensive | 72509-76-3  | Y    | C <sub>18</sub> H <sub>19</sub> Cl <sub>2</sub> NO <sub>4</sub>                |
| Feloprentan            | Antimigraine     | 204267-33-4 |      | C <sub>31</sub> H <sub>32</sub> N <sub>2</sub> O <sub>6</sub>                  |
| Femoxetine             | Antidepressant   | 59859-58-4  |      | C <sub>20</sub> H <sub>25</sub> NO <sub>2</sub>                                |
| Fenabutene             | Analgesic        | 5984-83-8   |      | C <sub>12</sub> H <sub>14</sub> O <sub>2</sub>                                 |
| Fenacetinol            | Unclassified     | 22521-79-5  |      | C <sub>10</sub> H <sub>13</sub> NO <sub>3</sub>                                |
| Fenaclon               | Antipsychotic    | 306-20-7    |      | C <sub>11</sub> H <sub>14</sub> ClNO                                           |
| Fenadiazole            | Sedative         | 1008-65-7   |      | C <sub>8</sub> H <sub>6</sub> N <sub>2</sub> O <sub>2</sub>                    |
| Fenaftic Acid          | Antifungal       | 27736-80-7  |      | C <sub>24</sub> H <sub>31</sub> NO <sub>4</sub>                                |
| Fenalamide             | Muscle Relaxant  | 4551-59-1   |      | C <sub>19</sub> H <sub>30</sub> N <sub>2</sub> O <sub>3</sub>                  |
| Fenalcomine            | Cardiotonic      | 34616-39-2  |      | C <sub>20</sub> H <sub>27</sub> NO <sub>2</sub>                                |
| Fenamifuril            | Unclassified     | 735-64-8    |      | C <sub>14</sub> H <sub>17</sub> NO <sub>5</sub>                                |
| Fenamole               | Antiinflammatory | 5467-78-7   |      | C <sub>7</sub> H <sub>7</sub> N <sub>5</sub>                                   |
| Fenaperone             | Antipsychotic    | 54063-38-6  |      | C <sub>21</sub> H <sub>29</sub> FN <sub>2</sub> O <sub>3</sub>                 |
| Fenbendazole           | Anthelminthic    | 43210-67-9  |      | C <sub>15</sub> H <sub>13</sub> N <sub>3</sub> O <sub>2</sub> S                |
| Fenbenicillin          | Antibiotic       | 1926-48-3   |      | C <sub>22</sub> H <sub>22</sub> N <sub>2</sub> O <sub>5</sub> S                |
| Fenbufen               | Antiinflammatory | 36330-85-5  | Y    | C <sub>16</sub> H <sub>14</sub> O <sub>3</sub>                                 |
| Fenbutrazate           | Anorexic         | 4378-36-3   |      | C <sub>23</sub> H <sub>29</sub> NO <sub>3</sub>                                |
| Fencamfamin            | Nootropic        | 1209-98-9   |      | C <sub>15</sub> H <sub>21</sub> N                                              |
| Fencibutirol           | Choleretic       | 5977-10-6   |      | C <sub>16</sub> H <sub>22</sub> O <sub>3</sub>                                 |
| Fenclofenac            | Antiinflammatory | 34645-84-6  |      | C <sub>14</sub> H <sub>10</sub> Cl <sub>2</sub> O <sub>3</sub>                 |
| Fenclonine             | Antidepressant   | 7424-00-2   |      | C <sub>9</sub> H <sub>10</sub> ClNO <sub>2</sub>                               |
| Fenclorac              | Antiinflammatory | 36616-52-1  |      | C <sub>14</sub> H <sub>16</sub> Cl <sub>2</sub> O <sub>2</sub>                 |
| Fenclozic Acid         | Antiinflammatory | 17969-20-9  |      | C <sub>11</sub> H <sub>8</sub> ClNO <sub>2</sub> S                             |
| Fendiline              | Vasodilator      | 13042-18-7  |      | C <sub>23</sub> H <sub>25</sub> N                                              |
| Fendizoate             | Antipsychotic    | 84627-04-3  |      | C <sub>20</sub> H <sub>14</sub> O <sub>4</sub>                                 |
| Fendosal               | Antiinflammatory | 53597-27-6  |      | C <sub>25</sub> H <sub>19</sub> NO <sub>3</sub>                                |
| Feneritrol             | Antihypertensive | 15301-67-4  |      | C <sub>45</sub> H <sub>52</sub> O <sub>8</sub>                                 |

Table S1. Cont.

| Common Name             | Indication         | CAS Number  | Oral | Molecular Formula                                                               |
|-------------------------|--------------------|-------------|------|---------------------------------------------------------------------------------|
| Fenestrel               | Estrogen           | 7698-97-7   |      | C <sub>16</sub> H <sub>20</sub> O <sub>2</sub>                                  |
| Fenethazine             | Antihistaminic     | 522-24-7    |      | C <sub>16</sub> H <sub>18</sub> N <sub>2</sub> S                                |
| Fenethylline            | Nootropic          | 3736-08-1   |      | C <sub>18</sub> H <sub>23</sub> N <sub>5</sub> O <sub>2</sub>                   |
| Fenetradil              | Antihypertensive   | 54063-39-7  |      | C <sub>22</sub> H <sub>36</sub> N <sub>2</sub> O <sub>3</sub>                   |
| Fenflumizole            | Antiinflammatory   | 73445-46-2  |      | C <sub>23</sub> H <sub>18</sub> F <sub>2</sub> N <sub>2</sub> O <sub>2</sub>    |
| Fenfluramine            | Anorexic           | 458-24-2    |      | C <sub>12</sub> H <sub>16</sub> F <sub>3</sub> N                                |
| Fengabine               | Antidepressant     | 80018-06-0  |      | C <sub>17</sub> H <sub>17</sub> Cl <sub>2</sub> NO                              |
| Fenharmane              | Unclassified       | 15301-68-5  |      | C <sub>18</sub> H <sub>18</sub> N <sub>2</sub>                                  |
| Fenimide                | Antipsychotic      | 60-45-7     |      | C <sub>13</sub> H <sub>15</sub> NO <sub>2</sub>                                 |
| Feniodium Chloride      | Antiprotozoal      | 71585-34-7  |      | C <sub>12</sub> H <sub>6</sub> Cl <sub>5</sub> I                                |
| Fenipentol              | Choleretic         | 583-03-9    |      | C <sub>11</sub> H <sub>16</sub> O                                               |
| Fenirofibrate           | Antihyperlipidemic | 54419-31-7  |      | C <sub>17</sub> H <sub>17</sub> ClO <sub>4</sub>                                |
| Fenisorex               | Anorexic           | 34887-52-0  |      | C <sub>16</sub> H <sub>16</sub> FNO                                             |
| Fenitrothion            | Dermatologic       | 122-14-5    |      | C <sub>9</sub> H <sub>12</sub> NO <sub>3</sub> PS                               |
| Fenleuton               | Antiinflammatory   | 141579-54-6 |      | C <sub>17</sub> H <sub>15</sub> FN <sub>2</sub> O <sub>3</sub>                  |
| Fenmetozole             | Antidepressant     | 41473-09-0  |      | C <sub>10</sub> H <sub>10</sub> Cl <sub>2</sub> N <sub>2</sub> O                |
| Fenmetramide            | Antidepressant     | 5588-29-4   |      | C <sub>11</sub> H <sub>13</sub> NO <sub>2</sub>                                 |
| Fenobam                 | Sedative           | 57653-26-6  |      | C <sub>11</sub> H <sub>11</sub> ClN <sub>4</sub> O <sub>2</sub>                 |
| Fenocinol               | Unclassified       | 3671-05-4   |      | C <sub>16</sub> H <sub>18</sub> O <sub>3</sub>                                  |
| Fenocitmine Sulfate     | Antiulcerative     | 69365-65-7  |      | C <sub>27</sub> H <sub>38</sub> N <sub>2</sub>                                  |
| Fenofibrate             | Antihyperlipidemic | 49562-28-9  | Y    | C <sub>20</sub> H <sub>21</sub> ClO <sub>4</sub>                                |
| Fenoldopam              | Antihypertensive   | 67227-56-9  |      | C <sub>16</sub> H <sub>16</sub> ClNO <sub>3</sub>                               |
| Fenoprofen              | Antiinflammatory   | 29679-58-1  | Y    | C <sub>15</sub> H <sub>14</sub> O <sub>3</sub>                                  |
| Fenoterol               | Bronchodilator     | 13392-18-2  |      | C <sub>17</sub> H <sub>21</sub> NO <sub>4</sub>                                 |
| Fenoverine              | Antispasmodic      | 37561-27-6  |      | C <sub>26</sub> H <sub>25</sub> N <sub>3</sub> O <sub>3</sub> S                 |
| Fenoxazoline            | Nootropic          | 4846-91-7   |      | C <sub>13</sub> H <sub>18</sub> N <sub>2</sub> O                                |
| Fenoxedil               | Vasodilator        | 54063-40-0  |      | C <sub>28</sub> H <sub>42</sub> N <sub>2</sub> O <sub>5</sub>                   |
| Fenozolone              | Nootropic          | 15302-16-6  |      | C <sub>11</sub> H <sub>12</sub> N <sub>2</sub> O <sub>2</sub>                   |
| Fenpentadiol            | Antidepressant     | 15687-18-0  |      | C <sub>12</sub> H <sub>17</sub> ClO <sub>2</sub>                                |
| Fenperate               | Unclassified       | 55837-26-8  |      | C <sub>25</sub> H <sub>31</sub> NO <sub>4</sub>                                 |
| Fenpipalone             | Antiinflammatory   | 21820-82-6  |      | C <sub>17</sub> H <sub>22</sub> N <sub>2</sub> O <sub>2</sub>                   |
| Fenpipramide            | Antispasmodic      | 77-01-0     |      | C <sub>21</sub> H <sub>26</sub> N <sub>2</sub> O                                |
| Fenpiprane              | Antispasmodic      | 3540-95-2   |      | C <sub>20</sub> H <sub>25</sub> N                                               |
| Fenpiverinium Bromide   | Antispasmodic      | 258329-46-3 |      | C <sub>22</sub> H <sub>29</sub> BrN <sub>2</sub> O                              |
| Fenprinast              | Bronchodilator     | 75184-94-0  |      | C <sub>16</sub> H <sub>16</sub> ClN <sub>5</sub> O                              |
| Fenproporex             | Anorexic           | 16397-28-7  |      | C <sub>12</sub> H <sub>16</sub> N <sub>2</sub>                                  |
| Fenprostalene           | Progestogen        | 69381-94-8  |      | C <sub>23</sub> H <sub>30</sub> O <sub>6</sub>                                  |
| Fenquizone              | Diuretic           | 20287-37-0  |      | C <sub>14</sub> H <sub>12</sub> ClN <sub>3</sub> O <sub>5</sub> S               |
| Fenretinide             | Antineoplastic     | 65646-68-6  |      | C <sub>26</sub> H <sub>33</sub> NO <sub>2</sub>                                 |
| Fenspiride              | Bronchodilator     | 5053-06-5   |      | C <sub>15</sub> H <sub>20</sub> N <sub>2</sub> O <sub>2</sub>                   |
| Fentanyl                | Analgesic          | 437-38-7    |      | C <sub>22</sub> H <sub>28</sub> N <sub>2</sub> O                                |
| Fenthion                | Ectoparasiticide   | 55-38-9     |      | C <sub>10</sub> H <sub>15</sub> O <sub>3</sub> PS <sub>2</sub>                  |
| Fentiazac               | Antiinflammatory   | 18046-21-4  |      | C <sub>17</sub> H <sub>12</sub> ClNO <sub>2</sub> S                             |
| Fenticlor               | Antibacterial      | 97-24-5     |      | C <sub>12</sub> H <sub>8</sub> Cl <sub>2</sub> O <sub>2</sub> S                 |
| Fenticonazole           | Antifungal         | 72479-26-6  |      | C <sub>24</sub> H <sub>20</sub> Cl <sub>2</sub> N <sub>2</sub> O <sub>5</sub> S |
| Fentonium Bromide       | Antibiotic         | 34786-74-8  |      | C <sub>31</sub> H <sub>34</sub> BrNO <sub>4</sub>                               |
| Fenyripol               | Muscle Relaxant    | 3607-24-7   |      | C <sub>12</sub> H <sub>13</sub> N <sub>3</sub> O                                |
| Fepentolic Acid         | Unclassified       | 17243-33-3  |      | C <sub>12</sub> H <sub>16</sub> O <sub>4</sub>                                  |
| Fepitrizol              | Unclassified       | 53415-46-6  |      | C <sub>15</sub> H <sub>14</sub> N <sub>4</sub> O                                |
| Fepradinol              | Antiinflammatory   | 36981-91-6  |      | C <sub>12</sub> H <sub>19</sub> NO <sub>2</sub>                                 |
| Feprazone               | Antiinflammatory   | 30748-29-9  |      | C <sub>20</sub> H <sub>20</sub> N <sub>2</sub> O <sub>2</sub>                   |
| Fepromide               | Analgesic          | 54063-41-1  |      | C <sub>23</sub> H <sub>30</sub> N <sub>2</sub> O <sub>5</sub>                   |
| Feprosidnine            | Unclassified       | 22293-47-6  |      | C <sub>11</sub> H <sub>13</sub> N <sub>3</sub> O                                |
| Ferric Cacodylate       | Anthelmintic       | 75-60-5     |      | C <sub>2</sub> H <sub>7</sub> AsO <sub>2</sub>                                  |
| Ferric Glycerophosphate | Hemantic           | 56-81-5     |      | C <sub>3</sub> H <sub>8</sub> O <sub>3</sub>                                    |
| Fesoterodine            | Urologic           | 286930-02-7 | Y    | C <sub>26</sub> H <sub>37</sub> NO <sub>3</sub>                                 |
| Fetoxylate              | Muscle Relaxant    | 54063-45-5  |      | C <sub>36</sub> H <sub>36</sub> N <sub>2</sub> O <sub>3</sub>                   |
| Fexicaine               | Anesthetic         | 54063-46-6  |      | C <sub>25</sub> H <sub>34</sub> N <sub>2</sub> O <sub>4</sub>                   |
| Fexinidazole            | Antiprotozoal      | 59729-37-2  | Y    | C <sub>12</sub> H <sub>13</sub> N <sub>3</sub> O <sub>3</sub> S                 |
| Fexofenadine            | Antihistaminic     | 83799-24-0  | Y    | C <sub>32</sub> H <sub>39</sub> NO <sub>4</sub>                                 |
| Fezatione               | Antifungal         | 15387-18-5  |      | C <sub>17</sub> H <sub>14</sub> N <sub>2</sub> S <sub>2</sub>                   |
| Fezolamine Fumarate     | Antidepressant     | 80410-36-2  |      | C <sub>20</sub> H <sub>23</sub> N <sub>3</sub>                                  |
| Fiacitabine             | Antiviral          | 69123-90-6  |      | C <sub>9</sub> H <sub>11</sub> FIN <sub>3</sub> O <sub>4</sub>                  |

Table S1. Cont.

| Common Name        | Indication       | CAS Number  | Oral | Molecular Formula                                                                           |
|--------------------|------------------|-------------|------|---------------------------------------------------------------------------------------------|
| Fialuridine        | Antiviral        | 69123-98-4  |      | C <sub>9</sub> H <sub>10</sub> FIN <sub>2</sub> O <sub>5</sub>                              |
| Fibracillin        | Antibiotic       | 51154-48-4  |      | C <sub>26</sub> H <sub>28</sub> ClN <sub>3</sub> O <sub>6</sub> S                           |
| Fidarestat         | Antidiabetic     | 136087-85-9 |      | C <sub>12</sub> H <sub>10</sub> FN <sub>3</sub> O <sub>4</sub>                              |
| Fidexaban          | Anticoagulant    | 183305-24-0 |      | C <sub>25</sub> H <sub>24</sub> F <sub>2</sub> N <sub>6</sub> O <sub>5</sub>                |
| Fiduxosin          | Androgen         | 208993-54-8 |      | C <sub>30</sub> H <sub>29</sub> N <sub>5</sub> O <sub>4</sub> S                             |
| Figopitant         | Antiemetic       | 502422-74-4 |      | C <sub>27</sub> H <sub>31</sub> F <sub>6</sub> N <sub>3</sub> O                             |
| Filaminast         | Bronchodilator   | 141184-34-1 |      | C <sub>15</sub> H <sub>20</sub> N <sub>2</sub> O <sub>4</sub>                               |
| Flenadol           | Analgesic        | 78168-92-0  |      | C <sub>14</sub> H <sub>19</sub> NO <sub>4</sub>                                             |
| Filipin            | Antifungal       | 480-49-9    |      | C <sub>35</sub> H <sub>58</sub> O <sub>11</sub>                                             |
| Finafloxacin       | Antibiotic       | 209342-40-5 |      | C <sub>20</sub> H <sub>19</sub> FN <sub>4</sub> O <sub>4</sub>                              |
| Finasteride        | Urologic         | 98319-26-7  | Y    | C <sub>23</sub> H <sub>36</sub> N <sub>2</sub> O <sub>2</sub>                               |
| Fingolimod         | Immunomodulator  | 162359-55-9 | Y    | C <sub>19</sub> H <sub>33</sub> NO <sub>2</sub>                                             |
| Finrozole          | Antiprotozoal    | 160146-17-8 |      | C <sub>18</sub> H <sub>15</sub> FN <sub>4</sub> O                                           |
| Fipamezole         | Antihypertensive | 150586-58-6 |      | C <sub>14</sub> H <sub>15</sub> FN <sub>2</sub>                                             |
| Fipexide           | Nootropic        | 34161-24-5  |      | C <sub>20</sub> H <sub>21</sub> ClN <sub>2</sub> O <sub>4</sub>                             |
| Firocoxib          | Antiinflammatory | 189954-96-9 |      | C <sub>17</sub> H <sub>20</sub> O <sub>5</sub> S                                            |
| Fispemifene        | Antineoplastic   | 341524-89-8 |      | C <sub>26</sub> H <sub>27</sub> ClO <sub>3</sub>                                            |
| Flamenol           | Antiarrhythmic   | 2174-64-3   |      | C <sub>7</sub> H <sub>8</sub> O <sub>3</sub>                                                |
| Flavamine          | Unclassified     | 15686-60-9  |      | C <sub>21</sub> H <sub>23</sub> NO <sub>2</sub>                                             |
| Flavodic Acid      | Unclassified     | 37470-13-6  |      | C <sub>19</sub> H <sub>14</sub> O <sub>8</sub>                                              |
| Flavodilol Maleate | Antihypertensive | 79619-31-1  |      | C <sub>21</sub> H <sub>23</sub> NO <sub>4</sub>                                             |
| Flavoxate          | Antispasmodic    | 15301-69-6  | Y    | C <sub>24</sub> H <sub>25</sub> NO <sub>4</sub>                                             |
| Flazalone          | Antiinflammatory | 21221-18-1  |      | C <sub>19</sub> H <sub>19</sub> F <sub>2</sub> NO <sub>2</sub>                              |
| Flecainide Acetate | Antiarrhythmic   | 54143-55-4  | Y    | C <sub>17</sub> H <sub>20</sub> F <sub>6</sub> N <sub>2</sub> O <sub>3</sub>                |
| Flerobutanol       | Antidepressant   | 82101-10-8  |      | C <sub>12</sub> H <sub>18</sub> FNO                                                         |
| Fleroxacin         | Antibiotic       | 79660-72-3  |      | C <sub>17</sub> H <sub>18</sub> F <sub>3</sub> N <sub>3</sub> O <sub>3</sub>                |
| Flesinoxan         | Anxiolytic       | 98206-10-1  |      | C <sub>22</sub> H <sub>26</sub> FN <sub>3</sub> O <sub>4</sub>                              |
| Flestolol Sulfate  | Antihypertensive | 87721-62-8  |      | C <sub>15</sub> H <sub>22</sub> FN <sub>3</sub> O <sub>4</sub>                              |
| Fletazepam         | Muscle Relaxant  | 34482-99-0  |      | C <sub>17</sub> H <sub>13</sub> ClF <sub>4</sub> N <sub>2</sub>                             |
| Flezelastrine      | Bronchodilator   | 135381-77-0 |      | C <sub>29</sub> H <sub>30</sub> FN <sub>3</sub> O                                           |
| Flibanserin        | Antidepressant   | 167933-07-5 |      | C <sub>20</sub> H <sub>21</sub> F <sub>3</sub> N <sub>4</sub> O                             |
| Flindokalner       | Nootropic        | 187523-35-9 |      | C <sub>16</sub> H <sub>10</sub> ClF <sub>4</sub> NO <sub>2</sub>                            |
| Floctafenine       | Analgesic        | 23779-99-9  |      | C <sub>20</sub> H <sub>17</sub> F <sub>3</sub> N <sub>2</sub> O <sub>4</sub>                |
| Flomoxef           | Antibiotic       | 99665-00-6  |      | C <sub>15</sub> H <sub>18</sub> F <sub>2</sub> N <sub>6</sub> O <sub>7</sub> S <sub>2</sub> |
| Flopropione        | Antispasmodic    | 2295-58-1   |      | C <sub>9</sub> H <sub>10</sub> O <sub>4</sub>                                               |
| Florantyrone       | Choleretic       | 519-95-9    |      | C <sub>20</sub> H <sub>14</sub> O <sub>3</sub>                                              |
| Flordipine         | Antihypertensive | 77590-96-6  |      | C <sub>26</sub> H <sub>33</sub> F <sub>3</sub> N <sub>2</sub> O <sub>5</sub>                |
| Floredil           | Vasodilator      | 53731-36-5  |      | C <sub>16</sub> H <sub>25</sub> NO <sub>4</sub>                                             |
| Florfenicol        | Antibiotic       | 73231-34-2  |      | C <sub>12</sub> H <sub>14</sub> Cl <sub>2</sub> FN <sub>4</sub> O <sub>4</sub> S            |
| Florifenine        | Antiinflammatory | 83863-79-0  |      | C <sub>23</sub> H <sub>22</sub> F <sub>3</sub> N <sub>3</sub> O <sub>2</sub>                |
| Flosatidil         | Vasodilator      | 113593-34-3 |      | C <sub>26</sub> H <sub>34</sub> F <sub>3</sub> N <sub>3</sub> O <sub>3</sub> S              |
| Flosequinan        | Antihypertensive | 76568-02-0  |      | C <sub>11</sub> H <sub>10</sub> FNO <sub>2</sub> S                                          |
| Flosulide          | Antiinflammatory | 80937-31-1  |      | C <sub>16</sub> H <sub>13</sub> F <sub>2</sub> NO <sub>4</sub> S                            |
| Flotrenizine       | Antihistaminic   | 89224-08-8  |      | C <sub>31</sub> H <sub>38</sub> F <sub>2</sub> N <sub>2</sub> O                             |
| Floverine          | Analgesic        | 27318-86-1  |      | C <sub>10</sub> H <sub>14</sub> O <sub>4</sub>                                              |
| Floxacillin        | Antibiotic       | 5250-39-5   | Y    | C <sub>19</sub> H <sub>17</sub> ClFN <sub>3</sub> O <sub>5</sub> S                          |
| Floxacrine         | Nootropic        | 53966-34-0  |      | C <sub>20</sub> H <sub>13</sub> ClF <sub>3</sub> NO <sub>3</sub>                            |
| Floxuridine        | Antiviral        | 50-91-9     | Y    | C <sub>9</sub> H <sub>11</sub> FN <sub>2</sub> O <sub>5</sub>                               |
| Fluacizine         | Antidepressant   | 30223-48-4  |      | C <sub>20</sub> H <sub>21</sub> F <sub>3</sub> N <sub>2</sub> O <sub>5</sub>                |
| Flualamide         | Diuretic         | 5107-49-3   |      | C <sub>17</sub> H <sub>23</sub> F <sub>3</sub> N <sub>2</sub> O <sub>2</sub>                |
| Fluanisone         | Antipsychotic    | 1480-19-9   |      | C <sub>21</sub> H <sub>25</sub> FN <sub>2</sub> O <sub>2</sub>                              |
| Fluazacort         | Antiinflammatory | 19888-56-3  |      | C <sub>25</sub> H <sub>30</sub> FNO <sub>6</sub>                                            |
| Flubanilate        | Nootropic        | 847-20-1    |      | C <sub>14</sub> H <sub>19</sub> F <sub>3</sub> N <sub>2</sub> O <sub>2</sub>                |
| Flubendazole       | Anthelmintic     | 31430-15-6  | Y    | C <sub>16</sub> H <sub>12</sub> FN <sub>3</sub> O <sub>3</sub>                              |
| Flubepride         | Antiprotozoal    | 56488-61-0  |      | C <sub>20</sub> H <sub>24</sub> FN <sub>3</sub> O <sub>4</sub> S                            |
| Flucarbril         | Analgesic        | 2261-94-1   |      | C <sub>11</sub> H <sub>8</sub> F <sub>3</sub> NO                                            |
| Flucetorex         | Anorexic         | 40256-99-3  |      | C <sub>20</sub> H <sub>21</sub> F <sub>3</sub> N <sub>2</sub> O <sub>3</sub>                |
| Flucindole         | Antipsychotic    | 40594-09-0  |      | C <sub>14</sub> H <sub>16</sub> F <sub>2</sub> N <sub>2</sub>                               |
| Fluciprazine       | Antipsychotic    | 54340-64-6  |      | C <sub>21</sub> H <sub>29</sub> FN <sub>2</sub> O <sub>2</sub>                              |
| Flucloronide       | Glucocorticoid   | 3693-39-8   |      | C <sub>24</sub> H <sub>29</sub> Cl <sub>2</sub> FO <sub>5</sub>                             |
| Fluconazole        | Antifungal       | 86386-73-4  | Y    | C <sub>13</sub> H <sub>12</sub> F <sub>2</sub> N <sub>6</sub> O                             |
| Flucrylate         | Dermatologic     | 23023-91-8  |      | C <sub>7</sub> H <sub>6</sub> F <sub>3</sub> NO <sub>2</sub>                                |
| Flucytosine        | Antifungal       | 2022-85-7   | Y    | C <sub>4</sub> H <sub>4</sub> FN <sub>3</sub> O                                             |

Table S1. Cont.

| Common Name              | Indication       | CAS Number  | Oral | Molecular Formula                                                                         |
|--------------------------|------------------|-------------|------|-------------------------------------------------------------------------------------------|
| Fludalanine              | Antibacterial    | 35523-45-6  |      | C <sub>3</sub> H <sub>5</sub> DFNO <sub>2</sub>                                           |
| Fludarabine              | Antineoplastic   | 21679-14-1  | Y    | C <sub>10</sub> H <sub>12</sub> FN <sub>5</sub> O <sub>4</sub>                            |
| Fludiazepam              | Anxiolytic       | 3900-31-0   |      | C <sub>16</sub> H <sub>12</sub> ClFN <sub>2</sub> O                                       |
| Fludorex                 | Anorexic         | 15221-81-5  |      | C <sub>11</sub> H <sub>14</sub> F <sub>3</sub> NO                                         |
| Fludoxopone              | Antiprotozoal    | 71923-29-0  |      | C <sub>21</sub> H <sub>21</sub> FN <sub>2</sub> O <sub>3</sub>                            |
| Fludrocortisone          | Steroid          | 127-31-1    | Y    | C <sub>21</sub> H <sub>29</sub> FO <sub>5</sub>                                           |
| Fludrocortisone Acetate  | Steroid          | 514-36-3    | Y    | C <sub>23</sub> H <sub>31</sub> FO <sub>6</sub>                                           |
| Flufenamic Acid          | Antiinflammatory | 530-78-9    |      | C <sub>14</sub> H <sub>10</sub> F <sub>3</sub> NO <sub>2</sub>                            |
| Flufenisal               | Analgesic        | 22494-27-5  |      | C <sub>15</sub> H <sub>11</sub> FO <sub>4</sub>                                           |
| Flufosal                 | Analgesic        | 65708-37-4  |      | C <sub>8</sub> H <sub>6</sub> F <sub>3</sub> O <sub>6</sub> P                             |
| Flufylline               | Bronchodilator   | 82190-91-8  |      | C <sub>21</sub> H <sub>24</sub> FN <sub>5</sub> O <sub>3</sub>                            |
| Fluindarol               | Vasodilator      | 6723-40-6   |      | C <sub>16</sub> H <sub>9</sub> F <sub>3</sub> O <sub>2</sub>                              |
| Fluindione               | Anticonvulsant   | 957-56-2    |      | C <sub>15</sub> H <sub>9</sub> FO <sub>2</sub>                                            |
| Flumazenil               | Antidote         | 78755-81-4  |      | C <sub>15</sub> H <sub>14</sub> FN <sub>3</sub> O <sub>3</sub>                            |
| Flumecinol               | Hepatoprotectant | 56430-99-0  |      | C <sub>16</sub> H <sub>15</sub> F <sub>3</sub> O                                          |
| Flumedroxone             | Analgesic        | 15687-21-5  |      | C <sub>22</sub> H <sub>29</sub> F <sub>3</sub> O <sub>3</sub>                             |
| Flumequine               | Antibacterial    | 42835-25-6  |      | C <sub>14</sub> H <sub>12</sub> FNO <sub>3</sub>                                          |
| Flumeridone              | Antiemetic       | 75444-64-3  |      | C <sub>22</sub> H <sub>23</sub> ClFN <sub>5</sub> O <sub>2</sub>                          |
| Flumethasone             | Glucocorticoid   | 2135-17-3   |      | C <sub>22</sub> H <sub>28</sub> F <sub>2</sub> O <sub>5</sub>                             |
| Flumethasone Pivalate    | Glucocorticoid   | 2002-29-1   |      | C <sub>27</sub> H <sub>36</sub> F <sub>2</sub> O <sub>6</sub>                             |
| Flumethiazide            | Ophthalmic       | 148-56-1    |      | C <sub>8</sub> H <sub>6</sub> F <sub>3</sub> N <sub>3</sub> O <sub>4</sub> S <sub>2</sub> |
| Flumethrin               | Ectoparasiticide | 69770-45-2  |      | C <sub>28</sub> H <sub>22</sub> Cl <sub>2</sub> FNO <sub>3</sub>                          |
| Flumetramide             | Muscle Relaxant  | 7125-73-7   |      | C <sub>11</sub> H <sub>10</sub> F <sub>3</sub> NO <sub>2</sub>                            |
| Flumexadol               | Sedative         | 30914-89-7  |      | C <sub>11</sub> H <sub>12</sub> F <sub>3</sub> NO                                         |
| Flumezapine              | Antipsychotic    | 61325-80-2  |      | C <sub>17</sub> H <sub>19</sub> FN <sub>4</sub> S                                         |
| Fluminorex               | Anorexic         | 720-76-3    |      | C <sub>10</sub> H <sub>9</sub> F <sub>3</sub> N <sub>2</sub> O                            |
| Flumizole                | Antiinflammatory | 36740-73-5  |      | C <sub>18</sub> H <sub>15</sub> F <sub>3</sub> N <sub>2</sub> O <sub>2</sub>              |
| Flumoxonide              | Steroid          | 60135-22-0  |      | C <sub>26</sub> H <sub>34</sub> F <sub>2</sub> O <sub>7</sub>                             |
| Flunamine                | Antidepressant   | 50366-32-0  |      | C <sub>15</sub> H <sub>15</sub> F <sub>2</sub> NO                                         |
| Flunarizine              | Vasodilator      | 52468-60-7  | y    | C <sub>26</sub> H <sub>26</sub> F <sub>2</sub> N <sub>2</sub>                             |
| Flunidazole              | Antiprotozoal    | 4548-15-6   |      | C <sub>11</sub> H <sub>10</sub> FN <sub>3</sub> O <sub>3</sub>                            |
| Flunisolide              | Glucocorticoid   | 3385-03-3   |      | C <sub>24</sub> H <sub>31</sub> FO <sub>6</sub>                                           |
| Flunisolide Acetate      | Antiinflammatory | 4533-89-5   |      | C <sub>26</sub> H <sub>33</sub> FO <sub>7</sub>                                           |
| Flunitrazepam            | Sedative         | 1622-62-4   | Y    | C <sub>16</sub> H <sub>12</sub> FN <sub>3</sub> O <sub>3</sub>                            |
| Flunixin                 | Antiinflammatory | 38677-85-9  |      | C <sub>14</sub> H <sub>11</sub> F <sub>3</sub> N <sub>2</sub> O <sub>2</sub>              |
| Flunoprost               | Antiulcerative   | 86348-98-3  |      | C <sub>22</sub> H <sub>29</sub> FO <sub>5</sub>                                           |
| Flunoxaprofen            | Antiinflammatory | 66934-18-7  |      | C <sub>16</sub> H <sub>12</sub> FNO <sub>3</sub>                                          |
| Fluocinolone Acetonide   | Antiinflammatory | 67-73-2     |      | C <sub>24</sub> H <sub>30</sub> F <sub>2</sub> O <sub>6</sub>                             |
| Fluocinonide             | Antiinflammatory | 356-12-7    |      | C <sub>26</sub> H <sub>32</sub> F <sub>2</sub> O <sub>7</sub>                             |
| Fluocortin Butyl         | Antiinflammatory | 41767-29-7  |      | C <sub>26</sub> H <sub>35</sub> FO <sub>5</sub>                                           |
| Fluocortolone            | Glucocorticoid   | 152-97-6    |      | C <sub>22</sub> H <sub>29</sub> FO <sub>4</sub>                                           |
| Fluocortolone Caproate   | Glucocorticoid   | 303-40-2    |      | C <sub>28</sub> H <sub>39</sub> FO <sub>5</sub>                                           |
| Fluoresone               | Anticonvulsant   | 2924-67-6   |      | C <sub>8</sub> H <sub>9</sub> FO <sub>2</sub> S                                           |
| Fluorometholone          | Glucocorticoid   | 426-13-1    |      | C <sub>22</sub> H <sub>29</sub> FO <sub>4</sub>                                           |
| Fluorouracil             | Antineoplastic   | 51-21-8     |      | C <sub>4</sub> H <sub>3</sub> FN <sub>2</sub> O <sub>2</sub>                              |
| Fluotracen               | Antipsychotic    | 35764-73-9  | Y    | C <sub>21</sub> H <sub>24</sub> F <sub>3</sub> N                                          |
| Fluoxetine               | Antidepressant   | 54910-89-3  | Y    | C <sub>17</sub> H <sub>18</sub> F <sub>3</sub> NO                                         |
| Fluoxymesterone          | Androgen         | 76-43-7     |      | C <sub>20</sub> H <sub>29</sub> FO <sub>3</sub>                                           |
| Fluparoxan               | Antidepressant   | 105182-45-4 | Y    | C <sub>10</sub> H <sub>10</sub> FNO <sub>2</sub>                                          |
| Flupentixol              | Antipsychotic    | 2709-56-0   | Y    | C <sub>23</sub> H <sub>25</sub> F <sub>3</sub> N <sub>2</sub> OS                          |
| Fluperamide              | Antispasmodic    | 53179-10-5  |      | C <sub>30</sub> H <sub>32</sub> ClF <sub>3</sub> N <sub>2</sub> O <sub>2</sub>            |
| Fluperlapine             | Antipsychotic    | 67121-76-0  |      | C <sub>19</sub> H <sub>20</sub> FN <sub>3</sub>                                           |
| Fluperolone Acetate      | Glucocorticoid   | 2119-75-7   |      | C <sub>24</sub> H <sub>31</sub> FO <sub>6</sub>                                           |
| Fluphenazine Decanoate   | Antipsychotic    | 5002-47-1   |      | C <sub>32</sub> H <sub>44</sub> F <sub>3</sub> N <sub>3</sub> O <sub>2</sub> S            |
| Fluphenazine Enanthate   | Antipsychotic    | 2746-81-8   | Y    | C <sub>29</sub> H <sub>38</sub> F <sub>3</sub> N <sub>3</sub> O <sub>2</sub> S            |
| Fluphenazine             | Antipsychotic    | 69-23-8     |      | C <sub>22</sub> H <sub>26</sub> F <sub>3</sub> N <sub>3</sub> OS                          |
| Flupimazine              | Antipsychotic    | 47682-41-7  |      | C <sub>23</sub> H <sub>27</sub> F <sub>3</sub> N <sub>2</sub> O <sub>2</sub> S            |
| Flupirtine               | Analgesic        | 56995-20-1  | Y    | C <sub>15</sub> H <sub>17</sub> FN <sub>4</sub> O <sub>2</sub>                            |
| Flupranone               | Analgesic        | 21686-10-2  |      | C <sub>20</sub> H <sub>24</sub> FN <sub>3</sub> O <sub>2</sub>                            |
| Fluprazine               | Antihypertensive | 76716-60-4  |      | C <sub>14</sub> H <sub>19</sub> F <sub>3</sub> N <sub>4</sub> O                           |
| Fluprednidene            | Analgesic        | 2193-87-5   |      | C <sub>22</sub> H <sub>27</sub> FO <sub>5</sub>                                           |
| Fluprednisolone          | Glucocorticoid   | 53-34-9     | Y    | C <sub>21</sub> H <sub>27</sub> FO <sub>5</sub>                                           |
| Fluprednisolone Valerate | Glucocorticoid   | 23257-44-5  |      | C <sub>26</sub> H <sub>35</sub> FO <sub>6</sub>                                           |

Table S1. Cont.

| Common Name            | Indication           | CAS Number  | Oral | Molecular Formula                                                              |
|------------------------|----------------------|-------------|------|--------------------------------------------------------------------------------|
| Fluprofen              | Antiinflammatory     | 17692-38-5  |      | C <sub>15</sub> H <sub>13</sub> FO <sub>2</sub>                                |
| Fluprofylline          | Bronchodilator       | 85118-43-0  |      | C <sub>22</sub> H <sub>26</sub> FN <sub>5</sub> O <sub>3</sub>                 |
| Fluproquazone          | Analgesic            | 40507-23-1  |      | C <sub>18</sub> H <sub>17</sub> FN <sub>2</sub> O                              |
| Fluprostenol           | Prostaglandin        | 40666-16-8  |      | C <sub>23</sub> H <sub>29</sub> F <sub>3</sub> O <sub>6</sub>                  |
| Fluquazone             | Antiinflammatory     | 37554-40-8  |      | C <sub>16</sub> H <sub>10</sub> ClF <sub>3</sub> N <sub>2</sub> O              |
| Fluradoline            | Analgesic            | 71316-84-2  |      | C <sub>17</sub> H <sub>16</sub> FNOS                                           |
| Flurandrenolide        | Glucocorticoid       | 1524-88-5   |      | C <sub>24</sub> H <sub>33</sub> FO <sub>6</sub>                                |
| Flurantel              | Anthelminthic        | 30533-89-2  |      | C <sub>19</sub> H <sub>12</sub> F <sub>6</sub> N <sub>2</sub> O <sub>7</sub>   |
| Flurazepam             | Anticonvulsant       | 17617-23-1  | Y    | C <sub>21</sub> H <sub>23</sub> ClFN <sub>3</sub> O                            |
| Flurbiprofen           | Antiinflammatory     | 5104-49-4   | Y    | C <sub>15</sub> H <sub>13</sub> FO <sub>2</sub>                                |
| Fluretofen             | Antiinflammatory     | 56917-29-4  |      | C <sub>14</sub> H <sub>9</sub> F                                               |
| Flurithromycin         | Antibiotic           | 82664-20-8  |      | C <sub>37</sub> H <sub>66</sub> FNO <sub>13</sub>                              |
| Flurocitabine          | Antineoplastic       | 37717-21-8  |      | C <sub>9</sub> H <sub>10</sub> FN <sub>5</sub> O <sub>4</sub>                  |
| Flurofamide            | Antibiotic           | 70788-28-2  |      | C <sub>7</sub> H <sub>9</sub> FN <sub>3</sub> O <sub>2</sub> P                 |
| Flurogestone Acetate   | Progestogen          | 2529-45-5   |      | C <sub>23</sub> H <sub>31</sub> FO <sub>5</sub>                                |
| Flurothyl              | Nootropic            | 333-36-8    |      | C <sub>4</sub> H <sub>4</sub> F <sub>6</sub> O                                 |
| Fluroxene              | Anesthetic           | 406-90-6    |      | C <sub>4</sub> H <sub>5</sub> F <sub>3</sub> O                                 |
| Flusoxolol             | Antihypertensive     | 84057-96-5  |      | C <sub>22</sub> H <sub>30</sub> FNO <sub>4</sub>                               |
| Fluspiperone           | Antipsychotic        | 54965-22-9  |      | C <sub>23</sub> H <sub>25</sub> F <sub>2</sub> N <sub>3</sub> O <sub>2</sub>   |
| Fluspirilene           | Antipsychotic        | 1841-19-6   | Y    | C <sub>29</sub> H <sub>31</sub> F <sub>2</sub> N <sub>3</sub> O                |
| Flutamide              | Antineoplastic       | 13311-84-7  | Y    | C <sub>11</sub> H <sub>11</sub> F <sub>3</sub> N <sub>2</sub> O <sub>3</sub>   |
| Flutazolam             | Anxiolytic           | 27060-91-9  |      | C <sub>19</sub> H <sub>18</sub> ClFN <sub>2</sub> O <sub>3</sub>               |
| Flutemazepam           | Anxiolytic           | 52391-89-6  |      | C <sub>16</sub> H <sub>12</sub> ClFN <sub>2</sub> O <sub>2</sub> S             |
| Flutiazin              | Antiinflammatory     | 7220-56-6   |      | C <sub>14</sub> H <sub>8</sub> F <sub>3</sub> NO <sub>2</sub> S                |
| Fluticasone Propionate | Glucocorticoid       | 80474-14-2  |      | C <sub>25</sub> H <sub>31</sub> F <sub>3</sub> O <sub>5</sub> S                |
| Flutizenol             | Antiarrhythmic       | 10202-40-1  |      | C <sub>20</sub> H <sub>24</sub> F <sub>3</sub> N <sub>3</sub> OS <sub>2</sub>  |
| Flutomidate            | Sedative             | 84962-75-4  |      | C <sub>14</sub> H <sub>15</sub> FN <sub>2</sub> O <sub>2</sub>                 |
| Flutonidine            | Antihypertensive     | 28125-87-3  |      | C <sub>10</sub> H <sub>12</sub> FN <sub>3</sub>                                |
| Flutoprazepam          | Anxiolytic           | 25967-29-7  |      | C <sub>19</sub> H <sub>16</sub> ClFN <sub>2</sub> O                            |
| Flutrimazole           | Antifungal           | 119006-77-8 |      | C <sub>22</sub> H <sub>16</sub> F <sub>2</sub> N <sub>2</sub>                  |
| Flutroline             | Antipsychotic        | 70801-02-4  |      | C <sub>27</sub> H <sub>25</sub> F <sub>3</sub> N <sub>2</sub> O                |
| Flutropium Bromide     | Bronchodilator       | 63516-07-4  |      | C <sub>24</sub> H <sub>29</sub> BrFNO <sub>3</sub>                             |
| Fluvastatin            | Antihyperlipidemic   | 93957-54-1  | Y    | C <sub>24</sub> H <sub>26</sub> FNO <sub>4</sub>                               |
| Fluvoxamine            | Antidepressant       | 54739-18-3  | Y    | C <sub>15</sub> H <sub>12</sub> F <sub>3</sub> N <sub>2</sub> O <sub>2</sub>   |
| Fluzinamide            | Anticonvulsant       | 76263-13-3  |      | C <sub>12</sub> H <sub>13</sub> F <sub>3</sub> N <sub>2</sub> O <sub>2</sub>   |
| Fluzoperine            | Antitussive          | 52867-77-3  |      | C <sub>15</sub> H <sub>19</sub> FN <sub>2</sub> O <sub>2</sub>                 |
| Fodipir                | Antitussive          | 118248-91-2 |      | C <sub>22</sub> H <sub>32</sub> N <sub>4</sub> O <sub>14</sub> P <sub>2</sub>  |
| Folescutol             | Capillary Protectant | 15687-22-6  |      | C <sub>14</sub> H <sub>15</sub> NO <sub>5</sub>                                |
| Fomepizole             | Antidote             | 7554-65-6   | Y    | C <sub>4</sub> H <sub>6</sub> N <sub>2</sub>                                   |
| Fomidacillin           | Antibiotic           | 98048-07-8  |      | C <sub>24</sub> H <sub>28</sub> N <sub>6</sub> O <sub>10</sub> S               |
| Fominoben              | Antitussive          | 18053-31-1  |      | C <sub>21</sub> H <sub>24</sub> ClN <sub>3</sub> O <sub>3</sub>                |
| Fomocaine              | Anesthetic           | 17692-39-6  |      | C <sub>20</sub> H <sub>25</sub> NO <sub>2</sub>                                |
| Fonazine Mesylate      | Antimigraine         | 7456-24-8   |      | C <sub>19</sub> H <sub>25</sub> N <sub>3</sub> O <sub>2</sub> S <sub>2</sub>   |
| Fopirtoline            | Analgesic            | 22514-23-4  |      | C <sub>11</sub> H <sub>15</sub> ClN <sub>2</sub> OS                            |
| Forasartan             | Antihypertensive     | 145216-43-9 |      | C <sub>23</sub> H <sub>28</sub> N <sub>8</sub>                                 |
| Forfenimex             | Immunomodulator      | 71522-58-2  |      | C <sub>9</sub> H <sub>11</sub> NO <sub>4</sub>                                 |
| Formebolone            | Steroid              | 2454-11-7   |      | C <sub>21</sub> H <sub>28</sub> O <sub>4</sub>                                 |
| Formestane             | Antineoplastic       | 566-48-3    |      | C <sub>19</sub> H <sub>26</sub> O <sub>3</sub>                                 |
| Formetorex             | Anorexic             | 22148-75-0  |      | C <sub>10</sub> H <sub>13</sub> NO                                             |
| Forminitrazole         | Unclassified         | 500-08-3    |      | C <sub>4</sub> H <sub>3</sub> N <sub>3</sub> O <sub>3</sub> S                  |
| Formocortal            | Glucocorticoid       | 2825-60-7   |      | C <sub>29</sub> H <sub>38</sub> ClFO <sub>8</sub>                              |
| Formoterol             | Bronchodilator       | 73573-87-2  | Y    | C <sub>19</sub> H <sub>24</sub> N <sub>2</sub> O <sub>4</sub>                  |
| Forodesine             | Antineoplastic       | 209799-67-7 |      | C <sub>11</sub> H <sub>14</sub> N <sub>4</sub> O <sub>4</sub>                  |
| Foropafant             | Antithrombotic       | 136468-36-5 |      | C <sub>28</sub> H <sub>40</sub> N <sub>4</sub> S                               |
| Fosamprenavir          | Antiviral            | 226700-79-4 | Y    | C <sub>25</sub> H <sub>36</sub> N <sub>3</sub> O <sub>9</sub> PS               |
| Fosarilate             | Antiviral            | 73514-87-1  |      | C <sub>17</sub> H <sub>28</sub> ClO <sub>5</sub> P                             |
| Fosazepam              | Sedative             | 35322-07-7  |      | C <sub>18</sub> H <sub>18</sub> ClN <sub>2</sub> O <sub>2</sub> P              |
| Foscarnet              | Antiviral            | 4428-95-9   |      | CH <sub>3</sub> O <sub>5</sub> P                                               |
| Foscolic Acid          | Unclassified         | 2398-95-0   |      | C <sub>6</sub> H <sub>11</sub> O <sub>8</sub> P                                |
| Fosenazide             | Unclassified         | 16543-10-5  |      | C <sub>14</sub> H <sub>15</sub> N <sub>2</sub> O <sub>2</sub> P                |
| Fosfluconazole         | Antifungal           | 194798-83-9 |      | C <sub>13</sub> H <sub>13</sub> F <sub>2</sub> N <sub>6</sub> O <sub>4</sub> P |
| Fosfluridine Tidoxil   | Antiviral            | 174638-15-4 |      | C <sub>34</sub> H <sub>62</sub> FN <sub>2</sub> O <sub>10</sub> PS             |
| Fosfomycin             | Antibiotic           | 23155-02-4  | Y    | C <sub>3</sub> H <sub>7</sub> O <sub>4</sub> P                                 |

Table S1. Cont.

| Common Name                       | Indication       | CAS Number  | Oral | Molecular Formula                                                              |
|-----------------------------------|------------------|-------------|------|--------------------------------------------------------------------------------|
| Fosfonet Sodium                   | Antiviral        | 4408-78-0   |      | C <sub>2</sub> H <sub>5</sub> O <sub>5</sub> P                                 |
| Fosfosol                          | Analgesic        | 6064-83-1   |      | C <sub>7</sub> H <sub>7</sub> O <sub>6</sub> P                                 |
| Fosfructose Trisodium             | Cardiotonic      | 488-69-7    |      | C <sub>6</sub> H <sub>14</sub> O <sub>12</sub> P <sub>2</sub>                  |
| Fosinopril                        | Antihypertensive | 98048-97-6  |      | C <sub>30</sub> H <sub>46</sub> NO <sub>7</sub> P                              |
| Fosinoprilat                      | Antihypertensive | 95399-71-6  |      | C <sub>23</sub> H <sub>34</sub> NO <sub>5</sub> P                              |
| Fosmenic Acid                     | Unclassified     | 13237-70-2  |      | C <sub>7</sub> H <sub>13</sub> O <sub>3</sub> P                                |
| Fosmidomycin                      | Antibiotic       | 66508-53-0  |      | C <sub>4</sub> H <sub>10</sub> NO <sub>5</sub> P                               |
| Fosopamine                        | Cardiotonic      | 103878-96-2 |      | C <sub>9</sub> H <sub>14</sub> NO <sub>5</sub> P                               |
| Fosphenytoin                      | Anticonvulsant   | 93390-81-9  |      | C <sub>16</sub> H <sub>15</sub> N <sub>2</sub> O <sub>6</sub> P                |
| Fospirate                         | Anthelminthic    | 5598-52-7   |      | C <sub>7</sub> H <sub>7</sub> Cl <sub>3</sub> NO <sub>4</sub> P                |
| Fospropofol Disodium              | Sedative         | 258516-89-1 |      | C <sub>13</sub> H <sub>21</sub> O <sub>5</sub> P                               |
| Fosquidone                        | Antineoplastic   | 114517-02-1 |      | C <sub>28</sub> H <sub>22</sub> NO <sub>6</sub> P                              |
| Fostedil                          | Vasodilator      | 75889-62-2  |      | C <sub>18</sub> H <sub>20</sub> NO <sub>3</sub> PS                             |
| Fostriecin Sodium                 | Antineoplastic   | 87810-56-8  |      | C <sub>19</sub> H <sub>27</sub> O <sub>9</sub> P                               |
| Fosveset                          | Antitussive      | 193901-91-6 |      | C <sub>33</sub> H <sub>44</sub> N <sub>3</sub> O <sub>14</sub> P               |
| Fotemustine                       | Antineoplastic   | 92118-27-9  |      | C <sub>9</sub> H <sub>19</sub> ClN <sub>3</sub> O <sub>5</sub> P               |
| Fozivudine Tidoxil                | Antiviral        | 141790-23-0 |      | C <sub>35</sub> H <sub>64</sub> N <sub>5</sub> O <sub>8</sub> PS               |
| Frabuprofen                       | Antiinflammatory | 98207-14-8  |      | C <sub>26</sub> H <sub>33</sub> F <sub>3</sub> N <sub>2</sub> O <sub>2</sub>   |
| Fradafiban                        | Antithrombotic   | 148396-36-5 |      | C <sub>20</sub> H <sub>21</sub> N <sub>3</sub> O <sub>4</sub>                  |
| Frakefamide                       | Ant ulcerative   | 188196-22-7 |      | C <sub>30</sub> H <sub>34</sub> FN <sub>5</sub> O <sub>5</sub>                 |
| Framycetin                        | Antibiotic       | 119-04-0    |      | C <sub>23</sub> H <sub>46</sub> N <sub>6</sub> O <sub>13</sub>                 |
| Frentizole                        | Immunomodulator  | 26130-02-9  |      | C <sub>15</sub> H <sub>13</sub> N <sub>3</sub> O <sub>2</sub> S                |
| Freselestat                       | Antidiabetic     | 208848-19-5 |      | C <sub>23</sub> H <sub>28</sub> N <sub>6</sub> O <sub>4</sub>                  |
| Fronepidil                        | Antihypertensive | 79700-63-3  |      | C <sub>21</sub> H <sub>31</sub> NO <sub>2</sub>                                |
| fropenem                          | Antibiotic       | 106560-14-9 |      | C <sub>12</sub> H <sub>15</sub> NO <sub>5</sub> S                              |
| Frovatriptan                      | Antimigraine     | 158747-02-5 | Y    | C <sub>14</sub> H <sub>17</sub> N <sub>3</sub> O                               |
| Froxiprost                        | Bronchodilator   | 62559-74-4  |      | C <sub>24</sub> H <sub>29</sub> F <sub>3</sub> O <sub>6</sub>                  |
| Ftaxilide                         | Antidiabetic     | 19368-18-4  |      | C <sub>16</sub> H <sub>15</sub> NO <sub>3</sub>                                |
| Ftivazide                         | Antibacterial    | 149-17-7    |      | C <sub>14</sub> H <sub>13</sub> N <sub>3</sub> O <sub>3</sub>                  |
| Ftormetazine                      | Antipsychotic    | 33414-30-1  |      | C <sub>21</sub> H <sub>22</sub> F <sub>3</sub> N <sub>3</sub> OS               |
| Ftorpropazine                     | Antidepressant   | 33414-36-7  |      | C <sub>22</sub> H <sub>24</sub> F <sub>3</sub> N <sub>3</sub> O <sub>2</sub> S |
| Fubrogonium Iodide                | Unclassified     | 3690-58-2   |      | C <sub>14</sub> H <sub>23</sub> BrNO <sub>3</sub> I                            |
| Fudosteine                        | Mucolytic        | 13189-98-5  | Y    | C <sub>6</sub> H <sub>13</sub> NO <sub>5</sub> S                               |
| Fulvestrant                       | Antineoplastic   | 129453-61-8 |      | C <sub>32</sub> H <sub>47</sub> F <sub>5</sub> O <sub>3</sub> S                |
| Fumagillin                        | Antineoplastic   | 23110-15-8  | Y    | C <sub>26</sub> H <sub>34</sub> O <sub>7</sub>                                 |
| Fumoxicillin                      | Antibacterial    | 78186-33-1  |      | C <sub>21</sub> H <sub>21</sub> N <sub>3</sub> O <sub>6</sub> S                |
| Fuprazole                         | Ant ulcerative   | 60248-23-9  |      | C <sub>28</sub> H <sub>30</sub> N <sub>4</sub> O <sub>2</sub>                  |
| Furacrinic Acid                   | Unclassified     | 23580-33-8  |      | C <sub>13</sub> H <sub>14</sub> O <sub>4</sub>                                 |
| Furafylline                       | Bronchodilator   | 80288-49-9  |      | C <sub>12</sub> H <sub>12</sub> N <sub>4</sub> O <sub>3</sub>                  |
| Furalazine                        | Antibiotic       | 556-12-7    |      | C <sub>9</sub> H <sub>7</sub> N <sub>5</sub> O <sub>3</sub>                    |
| Furaltadone                       | Antibiotic       | 139-91-3    |      | C <sub>13</sub> H <sub>16</sub> N <sub>4</sub> O <sub>6</sub>                  |
| Furaprofen                        | Antiinflammatory | 67700-30-5  |      | C <sub>17</sub> H <sub>14</sub> O <sub>3</sub>                                 |
| Furazabol                         | Steroid          | 1239-29-8   |      | C <sub>20</sub> H <sub>30</sub> N <sub>2</sub> O <sub>2</sub>                  |
| Furazolium Chloride               | Antibacterial    | 3878-26-0   |      | C <sub>9</sub> H <sub>8</sub> ClN <sub>3</sub> O <sub>3</sub> S                |
| Furbucillin                       | Antibiotic       | 54340-65-7  |      | C <sub>19</sub> H <sub>24</sub> N <sub>2</sub> O <sub>7</sub> S                |
| Furciprofen                       | Antiinflammatory | 58012-63-8  |      | C <sub>15</sub> H <sub>11</sub> ClO <sub>3</sub>                               |
| Furegrelate Sodium                | Antihypertensive | 85666-24-6  |      | C <sub>15</sub> H <sub>11</sub> NO <sub>3</sub>                                |
| Furethidine                       | Antihypertensive | 2385-81-1   |      | C <sub>21</sub> H <sub>31</sub> NO <sub>4</sub>                                |
| Furfenorex                        | Anorexic         | 3776-93-0   |      | C <sub>15</sub> H <sub>19</sub> NO                                             |
| Furfuryltrimethyl Ammonium Iodide | Unclassified     | 7618-86-2   |      | C <sub>8</sub> H <sub>14</sub> INO                                             |
| Furidarone                        | Cardiotonic      | 4662-17-3   |      | C <sub>13</sub> H <sub>10</sub> I <sub>2</sub> O <sub>3</sub>                  |
| Furmethoxadone                    | Unclassified     | 6281-26-1   |      | C <sub>9</sub> H <sub>9</sub> N <sub>3</sub> O <sub>5</sub>                    |
| Furnidipine                       | Antihypertensive | 138661-03-7 |      | C <sub>21</sub> H <sub>24</sub> N <sub>2</sub> O <sub>7</sub>                  |
| Furobufen                         | Antiinflammatory | 38873-55-1  |      | C <sub>16</sub> H <sub>12</sub> O <sub>4</sub>                                 |
| Furodazole                        | Anthelminthic    | 56119-96-1  |      | C <sub>15</sub> H <sub>11</sub> N <sub>3</sub> O <sub>2</sub>                  |
| Furofenac                         | Antiinflammatory | 56983-13-2  |      | C <sub>12</sub> H <sub>14</sub> O <sub>3</sub>                                 |
| Furomazine                        | Analgesic        | 28532-90-3  |      | C <sub>24</sub> H <sub>27</sub> ClN <sub>2</sub> O <sub>5</sub> S              |
| Furomine                          | Antianginal      | 142996-66-5 |      | C <sub>20</sub> H <sub>32</sub> N <sub>2</sub> O <sub>4</sub>                  |
| Furosemide                        | Diuretic         | 54-31-9     | Y    | C <sub>12</sub> H <sub>11</sub> ClN <sub>2</sub> O <sub>5</sub> S              |
| Furostilbestrol                   | Antineoplastic   | 549-40-6    |      | C <sub>28</sub> H <sub>24</sub> O <sub>6</sub>                                 |
| Furterene                         | Diuretic         | 7761-75-3   |      | C <sub>10</sub> H <sub>9</sub> N <sub>7</sub> O                                |
| Fusidic Acid                      | Antibacterial    | 6990-06-3   | Y    | C <sub>31</sub> H <sub>48</sub> O <sub>6</sub>                                 |

Table S1. Cont.

| Common Name             | Indication                   | CAS Number  | Oral | Molecular Formula                                                              |
|-------------------------|------------------------------|-------------|------|--------------------------------------------------------------------------------|
| Fuzlocillin             | Antibiotic                   | 66327-51-3  |      | C <sub>25</sub> H <sub>26</sub> N <sub>6</sub> O <sub>8</sub> S                |
| Gabapentin              | Anticonvulsant               | 60142-96-3  | Y    | C <sub>9</sub> H <sub>17</sub> NO <sub>2</sub>                                 |
| Gabexate                | Anticoagulant                | 39492-01-8  |      | C <sub>16</sub> H <sub>23</sub> N <sub>3</sub> O <sub>4</sub>                  |
| Gaboxadol               | Anticonvulsant               | 64603-91-4  |      | C <sub>6</sub> H <sub>8</sub> N <sub>2</sub> O <sub>2</sub>                    |
| Gacyclidine             | Anticonvulsant               | 68134-81-6  |      | C <sub>16</sub> H <sub>25</sub> NS                                             |
| Galamustine             | Antineoplastic               | 105618-02-8 |      | C <sub>10</sub> H <sub>19</sub> Cl <sub>2</sub> NO <sub>5</sub>                |
| Galantamine             | Nootropic                    | 357-70-0    | Y    | C <sub>17</sub> H <sub>21</sub> NO <sub>3</sub>                                |
| Galarubicin             | Antineoplastic               | 195612-80-7 |      | C <sub>30</sub> H <sub>32</sub> FNO <sub>13</sub>                              |
| Galdanetron             | Antiemetic                   | 116684-92-5 |      | C <sub>18</sub> H <sub>19</sub> N <sub>3</sub> O                               |
| Gallamine Triethiodide  | Neuromuscular Blocking Agent | 65-29-2     |      | C <sub>30</sub> H <sub>60</sub> I <sub>3</sub> N <sub>3</sub> O <sub>3</sub>   |
| Gallopamil              | Antianginal                  | 16662-47-8  | Y    | C <sub>28</sub> H <sub>40</sub> N <sub>2</sub> O <sub>5</sub>                  |
| Galocitabine            | Antineoplastic               | 124012-42-6 |      | C <sub>19</sub> H <sub>22</sub> FN <sub>3</sub> O <sub>8</sub>                 |
| Galosemide              | Diuretic                     | 52157-91-2  |      | C <sub>15</sub> H <sub>14</sub> F <sub>3</sub> N <sub>3</sub> O <sub>5</sub> S |
| Gamfexine               | Antidepressant               | 7273-99-6   |      | C <sub>17</sub> H <sub>27</sub> N                                              |
| Gamma-Aminobutyric Acid | Antihypertensive             | 56-12-2     |      | C <sub>4</sub> H <sub>9</sub> NO <sub>2</sub>                                  |
| Gamolenic Acid          | Dermatologic                 | 506-26-3    | Y    | C <sub>18</sub> H <sub>30</sub> O <sub>2</sub>                                 |
| Ganaxolone              | Anticonvulsant               | 38398-32-2  | Y    | C <sub>22</sub> H <sub>36</sub> O <sub>2</sub>                                 |
| Ganciclovir             | Antiviral                    | 82410-32-0  | Y    | C <sub>9</sub> H <sub>13</sub> N <sub>5</sub> O <sub>4</sub>                   |
| Gangliefene             | Vasodilator                  | 299-61-6    |      | C <sub>20</sub> H <sub>33</sub> NO <sub>3</sub>                                |
| Ganstigmine             | Neuromuscular Blocking Agent | 457075-21-7 |      | C <sub>22</sub> H <sub>27</sub> N <sub>3</sub> O <sub>3</sub>                  |
| Gantofiban              | Antithrombotic               | 183547-57-1 |      | C <sub>21</sub> H <sub>29</sub> N <sub>5</sub> O <sub>6</sub>                  |
| Gapicomine              | Analgesic                    | 1539-39-5   |      | C <sub>12</sub> H <sub>13</sub> N <sub>3</sub>                                 |
| Gapromidine             | Analgesic                    | 106686-40-2 |      | C <sub>14</sub> H <sub>21</sub> N <sub>7</sub>                                 |
| Garenoxacin Mesylate    | Antibacterial                | 194804-75-6 |      | C <sub>23</sub> H <sub>20</sub> F <sub>2</sub> N <sub>2</sub> O <sub>4</sub>   |
| Gatifloxacin            | Antibiotic                   | 112811-59-3 |      | C <sub>19</sub> H <sub>22</sub> FN <sub>3</sub> O <sub>4</sub>                 |
| Gavestinel              | Nootropic                    | 153436-22-7 |      | C <sub>18</sub> H <sub>12</sub> Cl <sub>2</sub> N <sub>2</sub> O <sub>3</sub>  |
| Gedocarnil              | Anxiolytic                   | 109623-97-4 |      | C <sub>23</sub> H <sub>21</sub> ClN <sub>2</sub> O <sub>4</sub>                |
| Gefarnate               | Antilucerative               | 51-77-4     |      | C <sub>27</sub> H <sub>44</sub> O <sub>2</sub>                                 |
| Gefitinib               | Antineoplastic               | 184475-35-2 | Y    | C <sub>22</sub> H <sub>24</sub> ClFN <sub>4</sub> O <sub>3</sub>               |
| Gemazocine              | Analgesic                    | 54063-47-7  |      | C <sub>20</sub> H <sub>29</sub> NO                                             |
| Gemcabene Calcium       | Antihyperlipidemic           | 183293-82-5 |      | C <sub>16</sub> H <sub>30</sub> O <sub>5</sub>                                 |
| Gemcadiol               | Antihyperlipidemic           | 35449-36-6  |      | C <sub>14</sub> H <sub>30</sub> O <sub>2</sub>                                 |
| Gemcitabine             | Antineoplastic               | 95058-81-4  |      | C <sub>9</sub> H <sub>11</sub> F <sub>2</sub> N <sub>3</sub> O <sub>4</sub>    |
| Gemprost                | Prostaglandin                | 64318-79-2  |      | C <sub>23</sub> H <sub>38</sub> O <sub>5</sub>                                 |
| Gemfibrozil             | Antihyperlipidemic           | 25812-30-0  | Y    | C <sub>15</sub> H <sub>22</sub> O <sub>3</sub>                                 |
| Gemifloxacin            | Antibiotic                   | 175463-14-6 | Y    | C <sub>18</sub> H <sub>20</sub> FN <sub>3</sub> O <sub>4</sub>                 |
| Gemopatrilat            | Antihypertensive             | 160135-92-2 |      | C <sub>19</sub> H <sub>26</sub> N <sub>2</sub> O <sub>4</sub> S                |
| Gepefrine               | Antihypotensive              | 18840-47-6  |      | C <sub>9</sub> H <sub>13</sub> NO                                              |
| Gepirone                | Anxiolytic                   | 83928-76-1  | Y    | C <sub>19</sub> H <sub>29</sub> N <sub>5</sub> O <sub>2</sub>                  |
| Geroquinol              | Antibiotic                   | 10457-66-6  |      | C <sub>16</sub> H <sub>22</sub> O <sub>2</sub>                                 |
| Gestaclone              | Progestogen                  | 19291-69-1  |      | C <sub>23</sub> H <sub>27</sub> ClO <sub>2</sub>                               |
| Gestadienol             | Unclassified                 | 14340-01-3  |      | C <sub>20</sub> H <sub>26</sub> O <sub>3</sub>                                 |
| Gestodene               | Progestogen                  | 60282-87-3  |      | C <sub>21</sub> H <sub>26</sub> O <sub>2</sub>                                 |
| Gestonorone Caproate    | Progestogen                  | 1253-28-7   |      | C <sub>26</sub> H <sub>38</sub> O <sub>4</sub>                                 |
| Gestrinone              | Progestogen                  | 16320-04-0  | Y    | C <sub>21</sub> H <sub>24</sub> O <sub>2</sub>                                 |
| Gevotroline             | Capillary Protectant         | 107266-06-8 |      | C <sub>19</sub> H <sub>20</sub> FN <sub>3</sub>                                |
| Gimatecan               | Antineoplastic               | 292618-32-7 |      | C <sub>25</sub> H <sub>25</sub> N <sub>3</sub> O <sub>5</sub>                  |
| Gimeracil               | Antineoplastic               | 103766-25-2 |      | C <sub>5</sub> H <sub>4</sub> ClNO <sub>2</sub>                                |
| Giparmen                | Unclassified                 | 67268-43-3  |      | C <sub>13</sub> H <sub>10</sub> O <sub>3</sub>                                 |
| Giracodazole            | Antineoplastic               | 110883-46-0 |      | C <sub>6</sub> H <sub>11</sub> ClN <sub>4</sub> O                              |
| Girisopam               | Anxiolytic                   | 82230-53-3  |      | C <sub>18</sub> H <sub>17</sub> ClN <sub>2</sub> O <sub>2</sub>                |
| Gitaloxin               | Cardiotonic                  | 3261-53-8   |      | C <sub>42</sub> H <sub>64</sub> O <sub>15</sub>                                |
| Gitoformate             | Cardiotonic                  | 10176-39-3  |      | C <sub>46</sub> H <sub>64</sub> O <sub>19</sub>                                |
| Glafenine               | Analgesic                    | 3820-67-5   |      | C <sub>19</sub> H <sub>17</sub> ClN <sub>2</sub> O <sub>4</sub>                |
| Glaucarubin             | Antiamebic                   | 1448-23-3   |      | C <sub>25</sub> H <sub>36</sub> O <sub>10</sub>                                |
| Glaziovine              | Antilucerative               | 6808-72-6   |      | C <sub>18</sub> H <sub>19</sub> NO <sub>3</sub>                                |
| Glemanserine            | Anxiolytic                   | 107703-78-6 |      | C <sub>20</sub> H <sub>25</sub> NO                                             |
| Glenvastatin            | Antihyperlipidemic           | 122254-45-9 |      | C <sub>27</sub> H <sub>26</sub> FNO <sub>3</sub>                               |
| Gliamilide              | Antidiabetic                 | 51876-98-3  |      | C <sub>23</sub> H <sub>33</sub> N <sub>5</sub> O <sub>5</sub> S                |
| Glibornuride            | Antidiabetic                 | 26944-48-9  | Y    | C <sub>18</sub> H <sub>26</sub> N <sub>2</sub> O <sub>4</sub> S                |
| Glibutimine             | Antilucerative               | 25859-76-1  |      | C <sub>21</sub> H <sub>30</sub> N <sub>4</sub> O <sub>3</sub> S                |

Table S1. Cont.

| Common Name         | Indication         | CAS Number  | Oral | Molecular Formula                                                               |
|---------------------|--------------------|-------------|------|---------------------------------------------------------------------------------|
| Glicaramide         | Antidiabetic       | 36980-34-4  |      | C <sub>30</sub> H <sub>42</sub> N <sub>6</sub> O <sub>5</sub> S                 |
| Glicetanile Sodium  | Antidiabetic       | 24455-58-1  |      | C <sub>23</sub> H <sub>25</sub> ClN <sub>4</sub> O <sub>4</sub> S               |
| Gliclazide          | Antidiabetic       | 21187-98-4  |      | C <sub>15</sub> H <sub>21</sub> N <sub>3</sub> O <sub>3</sub> S                 |
| Gliflumide          | Antidiabetic       | 35273-88-2  |      | C <sub>25</sub> H <sub>29</sub> FN <sub>4</sub> O <sub>4</sub> S                |
| Glimepiride         | Antidiabetic       | 93479-97-1  | Y    | C <sub>24</sub> H <sub>34</sub> N <sub>4</sub> O <sub>5</sub> S                 |
| Glipalamide         | Antidiabetic       | 37598-94-0  |      | C <sub>12</sub> H <sub>15</sub> N <sub>3</sub> O <sub>3</sub> S                 |
| Glipizide           | Antidiabetic       | 29094-61-9  | Y    | C <sub>21</sub> H <sub>27</sub> N <sub>5</sub> O <sub>4</sub> S                 |
| Gliquidone          | Antidiabetic       | 33342-05-1  |      | C <sub>27</sub> H <sub>33</sub> N <sub>3</sub> O <sub>6</sub> S                 |
| Glisamuride         | Antidiabetic       | 74680-07-2  |      | C <sub>23</sub> H <sub>31</sub> N <sub>5</sub> O <sub>4</sub> S                 |
| Glisentide          | Antidiabetic       | 32797-92-5  |      | C <sub>22</sub> H <sub>27</sub> N <sub>3</sub> O <sub>5</sub> S                 |
| Glisolamide         | Antidiabetic       | 24477-37-0  |      | C <sub>20</sub> H <sub>26</sub> N <sub>4</sub> O <sub>5</sub> S                 |
| Glisoxepide         | Antidiabetic       | 25046-79-1  |      | C <sub>20</sub> H <sub>27</sub> N <sub>5</sub> O <sub>5</sub> S                 |
| Gloxazone           | Antibiotic         | 2507-91-7   |      | C <sub>8</sub> H <sub>16</sub> N <sub>6</sub> O <sub>5</sub> S                  |
| Gloximonam          | Antibacterial      | 90850-05-8  |      | C <sub>18</sub> H <sub>25</sub> N <sub>5</sub> O <sub>8</sub> S                 |
| Glucalox            | Unclassified       | 18673-08-0  |      | C <sub>3</sub> H <sub>7</sub> AlO <sub>4</sub>                                  |
| Glucametacin        | Antiinflammatory   | 52443-21-7  |      | C <sub>25</sub> H <sub>27</sub> ClN <sub>2</sub> O <sub>8</sub>                 |
| Gluconolactone      | Antidote           | 90-80-2     |      | C <sub>6</sub> H <sub>10</sub> O <sub>6</sub>                                   |
| Glucosamine         | Antirheumatic      | 3416-24-8   | Y    | C <sub>6</sub> H <sub>13</sub> NO <sub>5</sub>                                  |
| Glucosulfamide      | Antibiotic         | 500-74-3    |      | C <sub>13</sub> H <sub>22</sub> N <sub>2</sub> O <sub>11</sub> S <sub>2</sub>   |
| Glucosulfone        | Antibiotic         | 551-89-3    |      | C <sub>24</sub> H <sub>36</sub> N <sub>2</sub> O <sub>18</sub> S <sub>3</sub>   |
| Glucurrolactone     | Unclassified       | 32449-92-6  |      | C <sub>6</sub> H <sub>8</sub> O <sub>6</sub>                                    |
| Glucuronamide       | Antibiotic         | 3789-97-7   |      | C <sub>6</sub> H <sub>11</sub> NO <sub>6</sub>                                  |
| Glufosfamide        | Antineoplastic     | 132682-98-5 |      | C <sub>10</sub> H <sub>21</sub> Cl <sub>2</sub> N <sub>2</sub> O <sub>7</sub> P |
| Glunicate           | Antihyperlipidemic | 80763-86-6  |      | C <sub>36</sub> H <sub>28</sub> N <sub>6</sub> O <sub>10</sub>                  |
| Glutamic Acid       | Anticonvulsant     | 56-86-0     |      | C <sub>5</sub> H <sub>9</sub> NO <sub>4</sub>                                   |
| Glutaurine          | Anticonvulsant     | 56488-60-9  |      | C <sub>7</sub> H <sub>14</sub> N <sub>2</sub> O <sub>6</sub> S                  |
| Glutethimide        | Sedative           | 77-21-4     |      | C <sub>13</sub> H <sub>15</sub> NO <sub>2</sub>                                 |
| Glyburide           | Antidiabetic       | 10238-21-8  | Y    | C <sub>23</sub> H <sub>28</sub> ClN <sub>3</sub> O <sub>5</sub> S               |
| Glybuthiazol        | Antidiabetic       | 535-65-9    |      | C <sub>12</sub> H <sub>16</sub> N <sub>4</sub> O <sub>2</sub> S <sub>2</sub>    |
| Glybuzole           | Antidiabetic       | 1492-02-0   |      | C <sub>12</sub> H <sub>15</sub> N <sub>3</sub> O <sub>2</sub> S <sub>2</sub>    |
| Glycopyramide       | Antiarrhythmic     | 631-27-6    |      | C <sub>11</sub> H <sub>14</sub> ClN <sub>3</sub> O <sub>3</sub> S               |
| Glycobiarsol        | Antiamebic         | 775514-86-8 |      | C <sub>8</sub> H <sub>9</sub> AsBiNO <sub>6</sub>                               |
| Glycocyamine        | Cardiotonic        | 352-97-6    |      | C <sub>3</sub> H <sub>7</sub> N <sub>3</sub> O <sub>2</sub>                     |
| Glycopyrrolate      | Antispasmodic      | 596-51-0    | Y    | C <sub>19</sub> H <sub>28</sub> BrN <sub>3</sub> O <sub>3</sub>                 |
| Glycyclamide        | Antitussive        | 664-95-9    |      | C <sub>14</sub> H <sub>20</sub> N <sub>2</sub> O <sub>3</sub> S                 |
| Glycyrrhizin        | Antiinflammatory   | 1405-86-3   |      | C <sub>42</sub> H <sub>62</sub> O <sub>16</sub>                                 |
| Glyhexamide         | Antidiabetic       | 451-71-8    |      | C <sub>16</sub> H <sub>22</sub> N <sub>2</sub> O <sub>3</sub> S                 |
| Glymidine Sodium    | Antidiabetic       | 339-44-6    |      | C <sub>13</sub> H <sub>15</sub> N <sub>3</sub> O <sub>4</sub> S                 |
| Glyoctamide         | Antidiabetic       | 1038-59-1   |      | C <sub>16</sub> H <sub>24</sub> N <sub>2</sub> O <sub>3</sub> S                 |
| Glyparamide         | Antidiabetic       | 5581-42-0   |      | C <sub>15</sub> H <sub>16</sub> ClN <sub>3</sub> O <sub>3</sub> S               |
| Glypinamide         | Unclassified       | 1228-19-9   |      | C <sub>13</sub> H <sub>18</sub> ClN <sub>3</sub> O <sub>3</sub> S               |
| Glysobuzole         | Antidiabetic       | 3567-08-6   |      | C <sub>13</sub> H <sub>17</sub> N <sub>3</sub> O <sub>3</sub> S <sub>2</sub>    |
| Goralatide          | Antihypertensive   | 120081-14-3 |      | C <sub>20</sub> H <sub>33</sub> N <sub>5</sub> O <sub>9</sub>                   |
| Goxalapladi         | Antihyperlipidemic | 412950-27-7 |      | C <sub>40</sub> H <sub>39</sub> F <sub>5</sub> N <sub>4</sub> O <sub>3</sub>    |
| Granisetron         | Antiemetic         | 109889-09-0 | Y    | C <sub>18</sub> H <sub>21</sub> D <sub>3</sub> N <sub>4</sub> O                 |
| Grepafloxacin       | Antibiotic         | 119914-60-2 | Y    | C <sub>19</sub> H <sub>22</sub> FN <sub>3</sub> O <sub>3</sub>                  |
| Griseofulvin        | Antifungal         | 126-07-8    | Y    | C <sub>17</sub> H <sub>17</sub> ClO <sub>6</sub>                                |
| Guabenxan           | Antihypertensive   | 19889-45-3  | Y    | C <sub>10</sub> H <sub>13</sub> N <sub>3</sub> O <sub>2</sub>                   |
| Guacetisal          | Analgesic          | 55482-89-8  |      | C <sub>16</sub> H <sub>14</sub> O <sub>5</sub>                                  |
| Guafecainol         | Antiarrhythmic     | 36199-78-7  |      | C <sub>16</sub> H <sub>27</sub> NO <sub>4</sub>                                 |
| Guaiacol            | Expectorant        | 90-05-1     |      | C <sub>7</sub> H <sub>8</sub> O <sub>2</sub>                                    |
| Guaiacol Carbonate  | Expectorant        | 553-17-3    |      | C <sub>15</sub> H <sub>14</sub> O <sub>5</sub>                                  |
| Guaiactamine        | Expectorant        | 15687-23-7  |      | C <sub>13</sub> H <sub>21</sub> NO <sub>2</sub>                                 |
| Guaiapate           | Antitussive        | 852-42-6    |      | C <sub>18</sub> H <sub>29</sub> NO <sub>4</sub>                                 |
| Guaietolin          | Expectorant        | 63834-83-3  |      | C <sub>11</sub> H <sub>16</sub> O <sub>4</sub>                                  |
| Guaiifenesin        | Expectorant        | 93-14-1     | Y    | C <sub>10</sub> H <sub>14</sub> O <sub>4</sub>                                  |
| Guaimesal           | Expectorant        | 81674-79-5  |      | C <sub>16</sub> H <sub>14</sub> O <sub>5</sub>                                  |
| Guaiasteine         | Cardiotonic        | 103181-72-2 |      | C <sub>15</sub> H <sub>19</sub> NO <sub>4</sub> S <sub>2</sub>                  |
| Guamecycline        | Antibiotic         | 16545-11-2  |      | C <sub>29</sub> H <sub>38</sub> N <sub>8</sub> O <sub>8</sub>                   |
| Guanabenz           | Antihypertensive   | 5051-62-7   |      | C <sub>8</sub> H <sub>8</sub> Cl <sub>2</sub> N <sub>4</sub>                    |
| Guanaciline Sulfate | Antihypertensive   | 1463-28-1   |      | C <sub>9</sub> H <sub>18</sub> N <sub>4</sub>                                   |
| Guanadrel           | Antihypertensive   | 40580-59-4  | Y    | C <sub>10</sub> H <sub>19</sub> N <sub>3</sub> O <sub>2</sub>                   |
| Guanazodine         | Antihypertensive   | 32059-15-7  |      | C <sub>9</sub> H <sub>20</sub> N <sub>4</sub>                                   |



Table S1. Cont.

| Common Name                 | Indication        | CAS Number | Oral | Molecular Formula                                                 |
|-----------------------------|-------------------|------------|------|-------------------------------------------------------------------|
| Guanclifone                 | Unclassified      | 55926-23-3 |      | C <sub>9</sub> H <sub>12</sub> Cl <sub>2</sub> N <sub>4</sub>     |
| Guancydine                  | Antihypertensive  | 1113-10-6  |      | C <sub>7</sub> H <sub>14</sub> N <sub>4</sub>                     |
| Guanethidine                | Antihypertensive  | 55-65-2    | Y    | C <sub>10</sub> H <sub>22</sub> N <sub>4</sub>                    |
| Guanfacine                  | Antihypertensive  | 29110-47-2 | Y    | C <sub>9</sub> H <sub>9</sub> Cl <sub>2</sub> N <sub>3</sub> O    |
| Guanidine                   | Cholinergic       | 113-00-8   |      | CH <sub>5</sub> N <sub>3</sub>                                    |
| Guanisoquin Sulfate         | Antihypertensive  | 154-73-4   |      | C <sub>10</sub> H <sub>12</sub> BrN <sub>3</sub>                  |
| Guanoclor Sulfate           | Antihypertensive  | 5001-32-1  |      | C <sub>9</sub> H <sub>12</sub> Cl <sub>2</sub> N <sub>4</sub> O   |
| Guanoctine                  | Antihypertensive  | 3658-25-1  |      | C <sub>9</sub> H <sub>21</sub> N <sub>3</sub>                     |
| Guanoxabenz                 | Antihypertensive  | 24047-25-4 |      | C <sub>8</sub> H <sub>8</sub> Cl <sub>2</sub> N <sub>4</sub> O    |
| Guanoxan                    | Antihypertensive  | 2165-19-7  |      | C <sub>10</sub> H <sub>13</sub> N <sub>3</sub> O <sub>2</sub>     |
| Guanoxyfen Sulfate          | Antihypertensive  | 13050-83-4 |      | C <sub>10</sub> H <sub>15</sub> N <sub>3</sub> O                  |
| Gusperimus Trihydrochloride | Immunosuppressant | 98629-43-7 |      | C <sub>17</sub> H <sub>37</sub> N <sub>7</sub> O <sub>3</sub>     |
| Halazepam                   | Sedative          | 23092-17-3 | Y    | C <sub>17</sub> H <sub>12</sub> ClF <sub>3</sub> N <sub>2</sub> O |
| Halcinonide                 | Antiinflammatory  | 3093-35-4  |      | C <sub>24</sub> H <sub>32</sub> ClFO <sub>5</sub>                 |
| Halobetasol Propionate      | Antiinflammatory  | 66852-54-8 |      | C <sub>25</sub> H <sub>31</sub> ClF <sub>2</sub> O <sub>5</sub>   |
| Halocortolone               | Glucocorticoid    | 24320-27-2 |      | C <sub>22</sub> H <sub>27</sub> ClF <sub>2</sub> O <sub>3</sub>   |
| Halofantrine                | Antimalarial      | 69756-53-2 | Y    | C <sub>26</sub> H <sub>30</sub> Cl <sub>2</sub> F <sub>3</sub> NO |
| Halofenate                  | Uricosuric        | 26718-25-2 |      | C <sub>19</sub> H <sub>17</sub> ClF <sub>3</sub> NO <sub>4</sub>  |
| Halofuginone                | Antiprotozoal     | 55837-20-2 |      | C <sub>16</sub> H <sub>17</sub> BrClN <sub>3</sub> O <sub>3</sub> |
| Halometasone                | Antiinflammatory  | 50629-82-8 |      | C <sub>22</sub> H <sub>27</sub> ClF <sub>2</sub> O <sub>5</sub>   |
| Halonamine                  | Antibiotic        | 50583-06-7 |      | C <sub>15</sub> H <sub>15</sub> ClFNO                             |
| Halopemide                  | Antipsychotic     | 59831-65-1 |      | C <sub>21</sub> H <sub>22</sub> ClFN <sub>4</sub> O <sub>2</sub>  |
| Halopenium Chloride         | Unclassified      | 7008-13-1  |      | C <sub>22</sub> H <sub>30</sub> BrCl <sub>2</sub> NO              |
| Haloperidol                 | Antispasmodic     | 52-86-8    | Y    | C <sub>21</sub> H <sub>23</sub> ClFNO <sub>2</sub>                |
| Haloperidol Decanoate       | Antipsychotic     | 74050-97-8 |      | C <sub>31</sub> H <sub>41</sub> ClFNO <sub>3</sub>                |
| Halopredone Acetate         | Antiinflammatory  | 57781-14-3 |      | C <sub>25</sub> H <sub>29</sub> BrF <sub>2</sub> O <sub>7</sub>   |
| Haloprogestrone             | Progestogen       | 3538-57-6  |      | C <sub>21</sub> H <sub>28</sub> BrFO <sub>2</sub>                 |
| Haloprogin                  | Antibacterial     | 777-11-7   |      | C <sub>9</sub> H <sub>4</sub> Cl <sub>3</sub> IO                  |
| Halothane                   | Anesthetic        | 151-67-7   |      | C <sub>2</sub> HBrClF <sub>3</sub>                                |
| Haloxazolam                 | Sedative          | 59128-97-1 |      | C <sub>17</sub> H <sub>14</sub> BrFN <sub>2</sub> O <sub>2</sub>  |
| Haloxon                     | Anthelmintic      | 321-55-1   |      | C <sub>14</sub> H <sub>14</sub> Cl <sub>3</sub> O <sub>6</sub> P  |
| Hepronicate                 | Vasodilator       | 7237-81-2  |      | C <sub>28</sub> H <sub>31</sub> N <sub>3</sub> O <sub>6</sub>     |
| Heptabarbital               | Sedative          | 509-86-4   |      | C <sub>13</sub> H <sub>18</sub> N <sub>2</sub> O <sub>3</sub>     |
| Heptaminol                  | Antihypotensive   | 372-66-7   |      | C <sub>8</sub> H <sub>19</sub> NO                                 |
| Heptaverine                 | Antispasmodic     | 54063-48-8 |      | C <sub>18</sub> H <sub>25</sub> N                                 |
| Heptolamide                 | Antidepressant    | 1034-82-8  |      | C <sub>15</sub> H <sub>22</sub> N <sub>2</sub> O <sub>3</sub> S   |
| Hepzidine                   | Antidepressant    | 1096-72-6  |      | C <sub>21</sub> H <sub>25</sub> NO                                |
| Hetacillin                  | Antibiotic        | 3511-16-8  |      | C <sub>19</sub> H <sub>23</sub> N <sub>3</sub> O <sub>4</sub> S   |
| Heteronium Bromide          | Mydriatic         | 7247-57-6  |      | C <sub>18</sub> H <sub>22</sub> BrNO <sub>3</sub> S               |
| Hexacyclonate Sodium        | Nootropic         | 7491-42-1  |      | C <sub>9</sub> H <sub>16</sub> O <sub>3</sub>                     |
| Hexacyprone                 | Mydriatic         | 892-01-3   |      | C <sub>16</sub> H <sub>20</sub> O <sub>3</sub>                    |
| Hexadiline                  | Vasodilator       | 3626-67-3  |      | C <sub>19</sub> H <sub>33</sub> N                                 |
| Hexafluorenium              | Muscle Relaxant   | 4844-10-4  |      | C <sub>36</sub> H <sub>42</sub> Br <sub>2</sub> N <sub>2</sub>    |
| Hexamethonium Bromide       | Antihypertensive  | 55-97-0    |      | C <sub>12</sub> H <sub>30</sub> Br <sub>2</sub> N <sub>2</sub>    |
| Hexamidine                  | Antitumor         | 125-33-7   |      | C <sub>12</sub> H <sub>14</sub> N <sub>2</sub> O <sub>2</sub>     |
| Hexapradol                  | Unclassified      | 15599-37-8 |      | C <sub>19</sub> H <sub>25</sub> NO                                |
| Hexapropfen                 | Antiinflammatory  | 24645-20-3 |      | C <sub>15</sub> H <sub>20</sub> O <sub>2</sub>                    |
| Hexapropymate               | Sedative          | 358-52-1   |      | C <sub>10</sub> H <sub>15</sub> NO <sub>2</sub>                   |
| Hexasonium Iodide           | Antispasmodic     | 25330-82-9 |      | C <sub>18</sub> H <sub>27</sub> IO <sub>2</sub> S                 |
| Hexazole                    | Unclassified      | 4671-03-8  |      | C <sub>10</sub> H <sub>17</sub> N <sub>3</sub>                    |
| Hexcarbacholine Bromide     | Muscle Relaxant   | 306-41-2   |      | C <sub>20</sub> H <sub>26</sub> N <sub>4</sub> O <sub>2</sub>     |
| Hexedine                    | Antibacterial     | 5980-31-4  |      | C <sub>22</sub> H <sub>45</sub> N <sub>3</sub>                    |
| Hexestrol                   | Estrogen          | 84-16-2    |      | C <sub>18</sub> H <sub>22</sub> O <sub>2</sub>                    |
| Hexobarbital                | Sedative          | 56-29-1    |      | C <sub>12</sub> H <sub>16</sub> N <sub>2</sub> O <sub>3</sub>     |
| Hexobendine                 | Vasodilator       | 54-03-5    |      | C <sub>30</sub> H <sub>44</sub> N <sub>2</sub> O <sub>10</sub>    |
| Hexoprenaline               | Bronchodilator    | 3215-70-1  |      | C <sub>22</sub> H <sub>32</sub> N <sub>2</sub> O <sub>6</sub>     |
| Hexylcaine                  | Anesthetic        | 532-77-4   |      | C <sub>16</sub> H <sub>23</sub> NO <sub>2</sub>                   |
| Hexylresorcinol             | Anthelmintic      | 136-77-6   |      | C <sub>12</sub> H <sub>18</sub> O <sub>2</sub>                    |
| Histamine                   | Antineoplastic    | 51-45-6    |      | C <sub>5</sub> H <sub>9</sub> N <sub>3</sub>                      |
| Histapyrrodine              | Antihistaminic    | 493-80-1   |      | C <sub>19</sub> H <sub>24</sub> N <sub>2</sub>                    |
| Homarylamine                | Muscle Relaxant   | 451-77-4   |      | C <sub>10</sub> H <sub>13</sub> NO <sub>2</sub>                   |
| Homatropine Hydrobromide    | Mydriatic         | 87-00-3    |      | C <sub>16</sub> H <sub>21</sub> NO <sub>3</sub>                   |
| Homatropine Methylbromide   | Mydriatic         | 31610-86-3 | Y    | C <sub>17</sub> H <sub>24</sub> BrNO <sub>3</sub>                 |

Table S1. Cont.

| Common Name                     | Indication                | CAS Number  | Oral | Molecular Formula                                                                         |
|---------------------------------|---------------------------|-------------|------|-------------------------------------------------------------------------------------------|
| Homidium Bromide                | Anthelmintic              | 1239-45-8   |      | C <sub>21</sub> H <sub>20</sub> BrN <sub>3</sub>                                          |
| Homochlorcyclizine              | Antihistaminic            | 848-53-3    |      | C <sub>19</sub> H <sub>23</sub> ClN <sub>2</sub>                                          |
| Homofenazine                    | Sedative                  | 3833-99-6   |      | C <sub>23</sub> H <sub>28</sub> F <sub>3</sub> N <sub>3</sub> OS                          |
| Homopipramol                    | Antidepressant            | 35142-68-8  |      | C <sub>24</sub> H <sub>31</sub> N <sub>3</sub> O                                          |
| Homosalate                      | Dermatologic              | 118-56-9    |      | C <sub>16</sub> H <sub>22</sub> O <sub>3</sub>                                            |
| Homprenorphine                  | Analgesic                 | 16549-56-7  |      | C <sub>28</sub> H <sub>37</sub> NO <sub>4</sub>                                           |
| Hopantenic Acid                 | Nootropic                 | 18679-90-8  |      | C <sub>10</sub> H <sub>19</sub> NO <sub>5</sub>                                           |
| Hoquizil                        | Bronchodilator            | 21560-59-8  |      | C <sub>19</sub> H <sub>26</sub> N <sub>4</sub> O <sub>5</sub>                             |
| Hycanthon                       | Anthelmintic              | 3105-97-3   |      | C <sub>20</sub> H <sub>24</sub> N <sub>2</sub> O <sub>2</sub> S                           |
| Hydracarbazine                  | Diuretic                  | 3614-47-9   |      | C <sub>5</sub> H <sub>7</sub> N <sub>5</sub> O                                            |
| Hydralazine                     | Antihypertensive          | 86-54-4     | Y    | C <sub>8</sub> H <sub>8</sub> N <sub>4</sub>                                              |
| Hydrastine                      | Cardiotonic               | 118-08-1    |      | C <sub>21</sub> H <sub>21</sub> NO <sub>6</sub>                                           |
| Hydrastinine                    | Cardiotonic               | 6592-85-4   |      | C <sub>11</sub> H <sub>13</sub> NO <sub>3</sub>                                           |
| Hydrobentizide                  | Diuretic                  | 13957-38-5  |      | C <sub>15</sub> H <sub>16</sub> ClN <sub>3</sub> O <sub>4</sub> S <sub>3</sub>            |
| Hydrochlorothiazide             | Diuretic                  | 58-93-5     | Y    | C <sub>7</sub> H <sub>8</sub> ClN <sub>3</sub> O <sub>4</sub> S <sub>2</sub>              |
| Hydrocodone                     | Antitussive               | 125-29-1    | Y    | C <sub>18</sub> H <sub>21</sub> NO <sub>3</sub>                                           |
| Hydrocortamate                  | Glucocorticoid            | 76-47-1     |      | C <sub>27</sub> H <sub>41</sub> NO <sub>6</sub>                                           |
| Hydrocortisone                  | Glucocorticoid            | 50-23-7     | Y    | C <sub>21</sub> H <sub>30</sub> O <sub>5</sub>                                            |
| Hydrocortisone Aceponate        | Glucocorticoid            | 74050-20-7  |      | C <sub>26</sub> H <sub>36</sub> O <sub>7</sub>                                            |
| Hydrocortisone Acetate          | Glucocorticoid            | 50-03-3     |      | C <sub>23</sub> H <sub>32</sub> O <sub>6</sub>                                            |
| Hydrocortisone Buteptrate       | Glucocorticoid            | 72590-77-3  |      | C <sub>28</sub> H <sub>40</sub> O <sub>7</sub>                                            |
| Hydrocortisone Butyrate         | Glucocorticoid            | 13609-67-1  |      | C <sub>25</sub> H <sub>36</sub> O <sub>6</sub>                                            |
| Hydrocortisone Cypionate        | Glucocorticoid            | 508-99-6    |      | C <sub>29</sub> H <sub>42</sub> O <sub>6</sub>                                            |
| Hydrocortisone Hemisuccinate    | Glucocorticoid            | 2203-97-6   |      | C <sub>25</sub> H <sub>34</sub> O <sub>8</sub>                                            |
| Hydrocortisone Sodium Phosphate | Glucocorticoid            | 3863-59-0   |      | C <sub>21</sub> H <sub>31</sub> O <sub>8</sub> P                                          |
| Hydrocortisone Tebutate         | Glucocorticoid            | 508-96-3    |      | C <sub>27</sub> H <sub>40</sub> O <sub>6</sub>                                            |
| Hydrocortisone Valerate         | Glucocorticoid            | 57524-89-7  |      | C <sub>26</sub> H <sub>38</sub> O <sub>6</sub>                                            |
| Hydrocotamine                   | Hemostatic                | 550-10-7    |      | C <sub>12</sub> H <sub>15</sub> NO <sub>3</sub>                                           |
| Hydroflumethiazide              | Antihypertensive          | 135-09-1    | Y    | C <sub>8</sub> H <sub>8</sub> F <sub>3</sub> N <sub>3</sub> O <sub>4</sub> S <sub>2</sub> |
| Hydromadinone                   | Progestogen               | 16469-74-2  |      | C <sub>21</sub> H <sub>29</sub> ClO <sub>3</sub>                                          |
| Hydromorfinol                   | Analgesic                 | 2183-56-4   |      | C <sub>17</sub> H <sub>21</sub> NO <sub>4</sub>                                           |
| Hydromorphone                   | Analgesic                 | 466-99-9    | Y    | C <sub>17</sub> H <sub>19</sub> NO <sub>3</sub>                                           |
| Hydroxindasate                  | Unclassified              | 7008-14-2   |      | C <sub>21</sub> H <sub>24</sub> N <sub>2</sub> O <sub>3</sub>                             |
| Hydroxindasol                   | Unclassified              | 7008-15-3   |      | C <sub>19</sub> H <sub>22</sub> N <sub>2</sub> O <sub>2</sub>                             |
| Hydroxyamphetamine              | Adrenergic                | 103-86-6    |      | C <sub>9</sub> H <sub>13</sub> NO                                                         |
| Hydroxychloroquine              | Antimalarial              | 118-42-3    | Y    | C <sub>18</sub> H <sub>26</sub> ClN <sub>3</sub> O                                        |
| Hydroxydione Sodium Succinate   | Anesthetic                | 80-96-6     |      | C <sub>25</sub> H <sub>36</sub> O <sub>6</sub>                                            |
| Hydroxyhexamide                 | Antidiabetic              | 3168-01-2   |      | C <sub>15</sub> H <sub>22</sub> N <sub>2</sub> O <sub>4</sub> S                           |
| Hydroxypethidine                | Analgesic                 | 468-56-4    |      | C <sub>15</sub> H <sub>21</sub> NO <sub>3</sub>                                           |
| Hydroxyphenamate                | Anxiolytic                | 50-19-1     |      | C <sub>11</sub> H <sub>15</sub> NO <sub>3</sub>                                           |
| Hydroxyprocaine                 | Analgesic                 | 487-53-6    |      | C <sub>13</sub> H <sub>20</sub> N <sub>2</sub> O <sub>3</sub>                             |
| Hydroxyprogesterone             | Progestogen               | 68-96-2     |      | C <sub>21</sub> H <sub>30</sub> O <sub>3</sub>                                            |
| Hydroxyprogesterone Caproate    | Progestogen               | 630-56-8    |      | C <sub>27</sub> H <sub>40</sub> O <sub>4</sub>                                            |
| Hydroxypyridine Tartrate        | Analgesic                 | 7008-17-5   |      | C <sub>9</sub> H <sub>9</sub> NO <sub>6</sub>                                             |
| Hydroxystenozole                | Unclassified              | 19120-01-5  |      | C <sub>21</sub> H <sub>30</sub> N <sub>2</sub> O                                          |
| Hydroxystilbamidine             | Antiprotozoal             | 495-99-8    |      | C <sub>16</sub> H <sub>16</sub> N <sub>4</sub> O                                          |
| Hydroxytetracaine               | Anesthetic                | 490-98-2    |      | C <sub>15</sub> H <sub>24</sub> N <sub>2</sub> O <sub>3</sub>                             |
| Hydroxytoluic Acid              | Antiinflammatory          | 83-40-9     |      | C <sub>8</sub> H <sub>8</sub> O <sub>3</sub>                                              |
| Hydroxyurea                     | Antineoplastic            | 127-07-1    | Y    | CH <sub>4</sub> N <sub>2</sub> O <sub>2</sub>                                             |
| Hydroxyzine                     | Anxiolytic                | 68-88-2     | Y    | C <sub>21</sub> H <sub>27</sub> ClN <sub>2</sub> O <sub>2</sub>                           |
| Hydroxyzine Pamoate             | Anxiolytic                | 130-85-8    |      | C <sub>23</sub> H <sub>16</sub> O <sub>6</sub>                                            |
| Hymecromone                     | Choleretic                | 90-33-5     |      | C <sub>10</sub> H <sub>8</sub> O <sub>3</sub>                                             |
| Hyoscyamine                     | Antispasmodic             | 101-31-5    |      | C <sub>17</sub> H <sub>23</sub> NO <sub>3</sub>                                           |
| Hypericin                       | Antidepressant            | 548-04-9    |      | C <sub>30</sub> H <sub>16</sub> O <sub>8</sub>                                            |
| Ibacinabine                     | Antiviral                 | 611-53-0    |      | C <sub>9</sub> H <sub>12</sub> IN <sub>3</sub> O <sub>4</sub>                             |
| Ibafloxacin                     | Antibacterial             | 91618-36-9  |      | C <sub>15</sub> H <sub>14</sub> FNO <sub>3</sub>                                          |
| Ibandronate                     | Bone Resorption Inhibitor | 114084-78-5 |      | C <sub>9</sub> H <sub>23</sub> NO <sub>7</sub> P <sub>2</sub>                             |
| Ibazocine                       | Analgesic                 | 57653-28-8  |      | C <sub>20</sub> H <sub>29</sub> NO                                                        |
| Ibopamine                       | Cardiotonic               | 66195-31-1  | Y    | C <sub>17</sub> H <sub>25</sub> NO <sub>4</sub>                                           |
| Ibrolipim                       | Antiobesity               | 133208-93-2 |      | C <sub>19</sub> H <sub>20</sub> BrN <sub>2</sub> O <sub>4</sub> P                         |
| Ibrotamide                      | Sedative                  | 466-14-8    |      | C <sub>7</sub> H <sub>14</sub> BrNO                                                       |
| Ibudilast                       | Vasodilator               | 50847-11-5  | Y    | C <sub>14</sub> H <sub>18</sub> N <sub>2</sub> O                                          |
| Ibufenac                        | Analgesic                 | 1553-60-2   |      | C <sub>12</sub> H <sub>16</sub> O <sub>2</sub>                                            |

Table S1. Cont.

| Common Name          | Indication         | CAS Number  | Oral | Molecular Formula                                                                           |
|----------------------|--------------------|-------------|------|---------------------------------------------------------------------------------------------|
| Ibuprofen            | Antiinflammatory   | 15687-27-1  | Y    | C <sub>13</sub> H <sub>18</sub> O <sub>2</sub>                                              |
| Ibuprofen Piconol    | Antiinflammatory   | 64622-45-3  |      | C <sub>19</sub> H <sub>22</sub> NO <sub>2</sub>                                             |
| Ibuproxam            | Antiinflammatory   | 53648-05-8  |      | C <sub>13</sub> H <sub>19</sub> NO <sub>2</sub>                                             |
| Ibutamoren Mesylate  | Pituitary          | 159634-47-6 |      | C <sub>27</sub> H <sub>36</sub> N <sub>4</sub> O <sub>5</sub> S                             |
| Ibuterol             | Bronchodilator     | 53034-85-8  |      | C <sub>20</sub> H <sub>31</sub> NO <sub>5</sub>                                             |
| Ibutilide            | Antiarrhythmic     | 122647-31-8 |      | C <sub>20</sub> H <sub>36</sub> N <sub>2</sub> O <sub>3</sub> S                             |
| Ibuproverine         | Antispasmodic      | 31221-85-9  |      | C <sub>18</sub> H <sub>26</sub> O <sub>3</sub>                                              |
| Iclaprim             | Antibacterial      | 192314-93-5 |      | C <sub>19</sub> H <sub>22</sub> N <sub>4</sub> O <sub>3</sub>                               |
| Iclazepam            | Anxiolytic         | 57916-70-8  |      | C <sub>21</sub> H <sub>21</sub> ClN <sub>2</sub> O <sub>2</sub>                             |
| Icodulinum           | Unclassified       | 138511-81-6 |      | C <sub>10</sub> H <sub>10</sub> N <sub>2</sub> OS                                           |
| Icofungipen          | Antifungal         | 198022-65-0 |      | C <sub>7</sub> H <sub>11</sub> NO <sub>2</sub>                                              |
| Icometasone Enbutate | Steroid            | 103466-73-5 |      | C <sub>28</sub> H <sub>37</sub> ClO <sub>7</sub>                                            |
| Icomucret            | Unclassified       | 54845-95-3  |      | C <sub>20</sub> H <sub>32</sub> O <sub>3</sub>                                              |
| Icopezil Maleate     | Nootropic          | 145508-78-7 |      | C <sub>23</sub> H <sub>25</sub> N <sub>3</sub> O <sub>2</sub>                               |
| Icosapent            | Antihyperlipidemic | 10417-94-4  | Y    | C <sub>20</sub> H <sub>30</sub> O <sub>2</sub>                                              |
| Icospiramide         | Antiinflammatory   | 79449-99-3  |      | C <sub>28</sub> H <sub>31</sub> F <sub>2</sub> N <sub>5</sub> O <sub>2</sub>                |
| Icotidine            | Antihistaminic     | 71351-79-6  |      | C <sub>21</sub> H <sub>25</sub> N <sub>5</sub> O <sub>2</sub>                               |
| Icrocaptide          | Antiinflammatory   | 169543-49-1 |      | C <sub>21</sub> H <sub>40</sub> N <sub>8</sub> O <sub>5</sub>                               |
| Idarubicin           | Antineoplastic     | 58957-92-9  | Y    | C <sub>26</sub> H <sub>27</sub> NO <sub>9</sub>                                             |
| Idaverine            | Antispasmodic      | 100927-13-7 |      | C <sub>24</sub> H <sub>39</sub> N <sub>3</sub> O <sub>3</sub>                               |
| Idazoxan             | Antiparkinsonian   | 79944-58-4  |      | C <sub>11</sub> H <sub>12</sub> N <sub>2</sub> O <sub>2</sub>                               |
| Idebenone            | Nootropic          | 58186-27-9  | Y    | C <sub>19</sub> H <sub>30</sub> O <sub>5</sub>                                              |
| Idenast              | Bronchodilator     | 108674-88-0 |      | C <sub>28</sub> H <sub>31</sub> FN <sub>4</sub> O <sub>2</sub>                              |
| Idoxifene            | Antineoplastic     | 116057-75-1 |      | C <sub>28</sub> H <sub>30</sub> INO                                                         |
| Idoxuridine          | Antiviral          | 54-42-2     |      | C <sub>9</sub> H <sub>11</sub> IN <sub>2</sub> O <sub>5</sub>                               |
| Idralfidine          | Sedative           | 95668-38-5  |      | C <sub>11</sub> H <sub>14</sub> N <sub>4</sub> O                                            |
| Idramantone          | Unclassified       | 20098-14-0  |      | C <sub>10</sub> H <sub>14</sub> O <sub>2</sub>                                              |
| Idrapril             | Antihypertensive   | 127420-24-0 |      | C <sub>11</sub> H <sub>18</sub> N <sub>2</sub> O <sub>5</sub>                               |
| Idremcinal           | Gastroprokinetic   | 110480-13-2 |      | C <sub>39</sub> H <sub>69</sub> NO <sub>12</sub>                                            |
| Idrocilamide         | Muscle Relaxant    | 6961-46-2   |      | C <sub>11</sub> H <sub>13</sub> NO <sub>2</sub>                                             |
| Idronoxil            | Antineoplastic     | 81267-65-4  | Y    | C <sub>15</sub> H <sub>12</sub> O <sub>3</sub>                                              |
| Idropranolol         | Antihypertensive   | 27581-02-8  |      | C <sub>16</sub> H <sub>23</sub> NO <sub>2</sub>                                             |
| Ifenprodil           | Vasodilator        | 23210-56-2  | Y    | C <sub>21</sub> H <sub>27</sub> NO <sub>2</sub>                                             |
| Iferanserlin         | Antihypertensive   | 58754-46-4  |      | C <sub>23</sub> H <sub>28</sub> N <sub>2</sub> O                                            |
| Ifetroban            | Antithrombotic     | 143443-90-7 |      | C <sub>25</sub> H <sub>32</sub> N <sub>2</sub> O <sub>5</sub>                               |
| Ifosfamide           | Antineoplastic     | 3778-73-2   |      | C <sub>7</sub> H <sub>15</sub> Cl <sub>2</sub> N <sub>2</sub> O <sub>2</sub> P              |
| Ifoxetine            | Antidepressant     | 66208-11-5  |      | C <sub>13</sub> H <sub>19</sub> NO <sub>2</sub>                                             |
| Iganidipine          | Vasodilator        | 119687-33-1 |      | C <sub>28</sub> H <sub>38</sub> N <sub>4</sub> O <sub>6</sub>                               |
| Igmesine             | Antidepressant     | 140850-73-3 |      | C <sub>23</sub> H <sub>29</sub> N                                                           |
| Iguratimod           | Immunomodulator    | 123663-49-0 | Y    | C <sub>17</sub> H <sub>14</sub> N <sub>2</sub> O <sub>6</sub> S                             |
| Ilaprazole           | Antiulcerative     | 172152-36-2 | Y    | C <sub>19</sub> H <sub>18</sub> N <sub>4</sub> O <sub>2</sub> S                             |
| Ilepcimide           | Anticonvulsant     | 82857-82-7  |      | C <sub>15</sub> H <sub>17</sub> NO <sub>3</sub>                                             |
| Iliparicil           | Antithrombotic     | 137214-72-3 |      | C <sub>16</sub> H <sub>18</sub> O <sub>6</sub> S                                            |
| Ilmofosine           | Antineoplastic     | 83519-04-4  |      | C <sub>26</sub> H <sub>56</sub> NO <sub>5</sub> PS                                          |
| Ilomastat            | Ophthalmic         | 142880-36-2 |      | C <sub>20</sub> H <sub>28</sub> N <sub>4</sub> O <sub>4</sub>                               |
| Ilonidap             | Antiinflammatory   | 135202-79-8 |      | C <sub>14</sub> H <sub>8</sub> ClFN <sub>2</sub> O <sub>3</sub> S                           |
| Iloperidone          | Antipsychotic      | 133454-47-4 | Y    | C <sub>24</sub> H <sub>27</sub> FN <sub>2</sub> O <sub>4</sub>                              |
| Iloprost             | Antithrombotic     | 78919-13-8  | Y    | C <sub>22</sub> H <sub>32</sub> O <sub>4</sub>                                              |
| Imafen               | Antidepressant     | 59198-18-4  |      | C <sub>11</sub> H <sub>13</sub> N <sub>3</sub>                                              |
| Imanixil             | Antihypertensive   | 75689-93-9  |      | C <sub>17</sub> H <sub>17</sub> F <sub>3</sub> N <sub>6</sub> O <sub>2</sub>                |
| Imatinib             | Antineoplastic     | 152459-95-5 | Y    | C <sub>29</sub> H <sub>31</sub> N <sub>7</sub> O                                            |
| Imazodan             | Cardiotonic        | 84243-58-3  |      | C <sub>13</sub> H <sub>12</sub> N <sub>4</sub> O                                            |
| Imcarbofos           | Anthelminthic      | 66608-32-0  |      | C <sub>17</sub> H <sub>30</sub> N <sub>4</sub> O <sub>7</sub> P <sub>2</sub> S <sub>2</sub> |
| Imexon               | Immunomodulator    | 59643-91-3  |      | C <sub>4</sub> H <sub>5</sub> N <sub>3</sub> O                                              |
| Imiclopazine         | Antipsychotic      | 7224-08-0   |      | C <sub>25</sub> H <sub>32</sub> ClN <sub>5</sub> OS                                         |
| Imidafenacin         | Antidepressant     | 170105-16-5 | Y    | C <sub>20</sub> H <sub>21</sub> N <sub>3</sub> O                                            |
| Imidapril            | Antihypertensive   | 89371-37-9  | Y    | C <sub>20</sub> H <sub>27</sub> N <sub>3</sub> O <sub>6</sub>                               |
| Imidaprilat          | Antihypertensive   | 89371-44-8  |      | C <sub>18</sub> H <sub>23</sub> N <sub>3</sub> O <sub>6</sub>                               |
| Imidazole Salicylate | Antiinflammatory   | 288-32-4    |      | C <sub>3</sub> H <sub>4</sub> N <sub>2</sub>                                                |
| Imidocarb            | Antiprotozoal      | 27885-92-3  |      | C <sub>19</sub> H <sub>20</sub> N <sub>6</sub> O                                            |
| Imidoline            | Antipsychotic      | 7303-78-8   |      | C <sub>13</sub> H <sub>18</sub> ClN <sub>3</sub> O                                          |
| Imiglitazar          | Antidiabetic       | 250601-04-8 |      | C <sub>28</sub> H <sub>26</sub> N <sub>2</sub> O <sub>5</sub>                               |
| Imiloxan             | Antidepressant     | 81167-16-0  |      | C <sub>14</sub> H <sub>16</sub> N <sub>2</sub> O <sub>2</sub>                               |

Table S1. Cont.

| Common Name          | Indication                | CAS Number  | Oral | Molecular Formula                                                              |
|----------------------|---------------------------|-------------|------|--------------------------------------------------------------------------------|
| Iminophenimide       | Unclassified              | 7008-18-6   |      | C <sub>12</sub> H <sub>14</sub> N <sub>2</sub> O <sub>2</sub>                  |
| Imipenem             | Antibacterial             | 64221-86-9  |      | C <sub>12</sub> H <sub>17</sub> N <sub>3</sub> O <sub>4</sub> S                |
| Imipramine           | Antidepressant            | 50-49-7     | Y    | C <sub>19</sub> H <sub>24</sub> N <sub>2</sub>                                 |
| Imipraminoxide       | Antidepressant            | 6829-98-7   |      | C <sub>19</sub> H <sub>24</sub> N <sub>2</sub> O                               |
| Imiquimod            | Antiviral                 | 99011-02-6  |      | C <sub>14</sub> H <sub>16</sub> N <sub>4</sub>                                 |
| Imirestat            | Antidiabetic              | 89391-50-4  |      | C <sub>15</sub> H <sub>8</sub> F <sub>2</sub> N <sub>2</sub> O <sub>2</sub>    |
| Imitrodast           | Antiinflammatory          | 114686-12-3 |      | C <sub>13</sub> H <sub>12</sub> N <sub>2</sub> O <sub>2</sub> S                |
| Imolamine            | Antianginal               | 318-23-0    |      | C <sub>14</sub> H <sub>20</sub> N <sub>4</sub> O                               |
| Imoxiterol           | Bronchodilator            | 88578-07-8  |      | C <sub>20</sub> H <sub>25</sub> N <sub>3</sub> O <sub>3</sub>                  |
| Impacarzine          | Anthelminthic             | 41340-39-0  |      | C <sub>28</sub> H <sub>55</sub> N <sub>5</sub> O <sub>2</sub>                  |
| Implitapide          | Antihyperlipidemic        | 177469-96-4 |      | C <sub>35</sub> H <sub>37</sub> N <sub>3</sub> O <sub>2</sub>                  |
| Improsulfan          | Antineoplastic            | 13425-98-4  |      | C <sub>8</sub> H <sub>19</sub> NO <sub>6</sub> S <sub>2</sub>                  |
| Imuracetam           | Nootropic                 | 67542-41-0  |      | C <sub>11</sub> H <sub>18</sub> N <sub>4</sub> O <sub>3</sub>                  |
| Inaperisone          | Muscle Relaxant           | 99323-21-4  |      | C <sub>16</sub> H <sub>23</sub> NO                                             |
| Incadronic Acid      | Antineoplastic            | 124351-85-5 |      | C <sub>8</sub> H <sub>19</sub> NO <sub>6</sub> P <sub>2</sub>                  |
| Incyclinide          | Dermatologic              | 15866-90-7  | Y    | C <sub>19</sub> H <sub>17</sub> NO <sub>7</sub>                                |
| Indacaterol          | Bronchodilator            | 312753-06-3 |      | C <sub>24</sub> H <sub>28</sub> N <sub>2</sub> O <sub>3</sub>                  |
| Indacrinone          | Antihypertensive          | 56049-88-8  |      | C <sub>18</sub> H <sub>14</sub> Cl <sub>2</sub> O <sub>4</sub>                 |
| Indalpine            | Antidepressant            | 63758-79-2  |      | C <sub>15</sub> H <sub>20</sub> N <sub>2</sub>                                 |
| Indanazoline         | Decongestant              | 40507-78-6  |      | C <sub>12</sub> H <sub>15</sub> N <sub>3</sub>                                 |
| Indanidine           | Antihypotensive           | 85392-79-6  |      | C <sub>11</sub> H <sub>13</sub> N <sub>5</sub>                                 |
| Indanorex            | Anorexic                  | 16112-96-2  |      | C <sub>12</sub> H <sub>17</sub> NO                                             |
| Indapamide           | Antihypertensive          | 26807-65-8  | Y    | C <sub>16</sub> H <sub>16</sub> ClN <sub>3</sub> O <sub>3</sub> S              |
| Indatraline          | Antipsychotic             | 86939-10-8  |      | C <sub>16</sub> H <sub>15</sub> Cl <sub>2</sub> N                              |
| Indecainide          | Antiarrhythmic            | 74517-78-5  |      | C <sub>20</sub> H <sub>24</sub> N <sub>2</sub> O                               |
| Indeloxazine         | Antidepressant            | 60929-23-9  | Y    | C <sub>14</sub> H <sub>17</sub> NO <sub>2</sub>                                |
| Indenolol            | Antiarrhythmic            | 60607-68-3  | Y    | C <sub>15</sub> H <sub>21</sub> NO <sub>2</sub>                                |
| Indibulin            | Antineoplastic            | 204205-90-3 | Y    | C <sub>22</sub> H <sub>16</sub> ClN <sub>3</sub> O <sub>2</sub>                |
| Indinavir            | Antiviral                 | 150378-17-9 | Y    | C <sub>36</sub> H <sub>47</sub> N <sub>5</sub> O <sub>4</sub>                  |
| Indiplon             | Sedative                  | 325715-02-4 |      | C <sub>20</sub> H <sub>16</sub> N <sub>4</sub> O <sub>2</sub> S                |
| Indisetron           | Antiemetic                | 141549-75-9 | Y    | C <sub>17</sub> H <sub>23</sub> N <sub>5</sub> O                               |
| Indisulam            | Antineoplastic            | 165668-41-7 |      | C <sub>14</sub> H <sub>12</sub> ClN <sub>3</sub> O <sub>4</sub> S <sub>2</sub> |
| Indobufen            | Antithrombotic            | 63610-08-2  |      | C <sub>18</sub> H <sub>17</sub> NO <sub>3</sub>                                |
| Indocate             | Estrogen                  | 31386-25-1  |      | C <sub>22</sub> H <sub>26</sub> N <sub>2</sub> O <sub>2</sub>                  |
| Indolapril           | Antihypertensive          | 80876-01-3  |      | C <sub>24</sub> H <sub>34</sub> N <sub>2</sub> O <sub>5</sub>                  |
| Indolidan            | Cardiotonic               | 100643-96-7 |      | C <sub>14</sub> H <sub>15</sub> N <sub>3</sub> O <sub>2</sub>                  |
| Indomethacin         | Antiinflammatory          | 53-86-1     | Y    | C <sub>19</sub> H <sub>16</sub> ClNO <sub>4</sub>                              |
| Indopanolol          | Antianginal               | 69907-17-1  |      | C <sub>20</sub> H <sub>23</sub> ClN <sub>2</sub> O <sub>3</sub>                |
| Indopine             | Urologic                  | 3569-26-4   |      | C <sub>23</sub> H <sub>28</sub> N <sub>2</sub>                                 |
| Indoprofen           | Analgesic                 | 31842-01-0  |      | C <sub>17</sub> H <sub>15</sub> NO <sub>3</sub>                                |
| Indoramim            | Antihypertensive          | 26844-12-2  |      | C <sub>22</sub> H <sub>25</sub> N <sub>3</sub> O                               |
| Indorelate           | Antihypertensive          | 73758-06-2  |      | C <sub>13</sub> H <sub>16</sub> N <sub>2</sub> O <sub>3</sub>                  |
| Indoxole             | Antiinflammatory          | 5034-76-4   |      | C <sub>22</sub> H <sub>19</sub> NO <sub>2</sub>                                |
| Indriline            | Nootropic                 | 7395-90-6   |      | C <sub>19</sub> H <sub>21</sub> N                                              |
| Inecalcitol          | Bone Resorption Inhibitor | 163217-09-2 | Y    | C <sub>26</sub> H <sub>40</sub> O <sub>3</sub>                                 |
| Ingliforib           | Antidiabetic              | 186392-65-4 |      | C <sub>23</sub> H <sub>24</sub> ClN <sub>3</sub> O <sub>5</sub>                |
| Inicarone            | Anticoagulant             | 39178-37-5  |      | C <sub>17</sub> H <sub>15</sub> NO <sub>2</sub>                                |
| Inocoterone Acetate  | Dermatologic              | 83646-86-0  |      | C <sub>18</sub> H <sub>26</sub> O <sub>3</sub>                                 |
| Inogatran            | Antithrombotic            | 155415-08-0 |      | C <sub>21</sub> H <sub>38</sub> N <sub>6</sub> O <sub>4</sub>                  |
| Inosine Pranobex     | Antiviral                 | 58-63-9     | Y    | C <sub>10</sub> H <sub>12</sub> N <sub>4</sub> O <sub>5</sub>                  |
| Inositol Niacinate   | Vasodilator               | 6556-11-2   |      | C <sub>42</sub> H <sub>30</sub> N <sub>6</sub> O <sub>12</sub>                 |
| Inproquone           | Antiamoebic               | 436-40-8    |      | C <sub>16</sub> H <sub>22</sub> N <sub>2</sub> O <sub>4</sub>                  |
| Intermedine          | Antineoplastic            | 10285-06-0  |      | C <sub>15</sub> H <sub>25</sub> NO <sub>5</sub>                                |
| Intoplicine          | Antiarrhythmic            | 125974-72-3 |      | C <sub>21</sub> H <sub>24</sub> N <sub>4</sub> O                               |
| Intrazole            | Antiinflammatory          | 15992-13-9  |      | C <sub>17</sub> H <sub>12</sub> ClN <sub>5</sub> O                             |
| Intriptyline         | Antidepressant            | 27466-27-9  |      | C <sub>21</sub> H <sub>19</sub> N                                              |
| Iobutoic Acid        | Choleretic                | 13445-12-0  |      | C <sub>15</sub> H <sub>16</sub> I <sub>3</sub> NO <sub>5</sub>                 |
| Iodetryl             | Unclassified              | 7008-02-8   |      | C <sub>20</sub> H <sub>38</sub> I <sub>2</sub> O <sub>2</sub>                  |
| Iodobenzoic Acid     | Unclassified              | 1321-07-9   |      | C <sub>7</sub> H <sub>5</sub> IO <sub>2</sub>                                  |
| Iodocystine          | Unclassified              | 1320-92-9   |      | C <sub>6</sub> H <sub>11</sub> IN <sub>2</sub> O <sub>4</sub> S <sub>2</sub>   |
| Iodoform             | Antibacterial             | 75-47-8     |      | CHI <sub>3</sub>                                                               |
| Iodophthalein Sodium | Laxative                  | 386-17-4    |      | C <sub>20</sub> H <sub>10</sub> I <sub>4</sub> O <sub>4</sub>                  |
| Iodoquinol           | Antiamoebic               | 83-73-8     |      | C <sub>9</sub> H <sub>5</sub> I <sub>2</sub> NO                                |

Table S1. Cont.

| Common Name            | Indication       | CAS Number  | Oral | Molecular Formula                                                            |
|------------------------|------------------|-------------|------|------------------------------------------------------------------------------|
| Iodothiouracil         | Antineoplastic   | 5984-97-4   |      | C <sub>4</sub> H <sub>3</sub> IN <sub>2</sub> OS                             |
| Iosimide               | Antiinflammatory | 79211-10-2  |      | C <sub>21</sub> H <sub>30</sub> I <sub>3</sub> N <sub>3</sub> O <sub>9</sub> |
| Ipamorelin             | Cardiotonic      | 170851-70-4 |      | C <sub>38</sub> H <sub>49</sub> N <sub>9</sub> O <sub>5</sub>                |
| Ipazilide Fumarate     | Antiarrhythmic   | 115436-73-2 |      | C <sub>24</sub> H <sub>30</sub> N <sub>4</sub> O                             |
| Ipenoxazone            | Antidepressant   | 104454-71-9 |      | C <sub>22</sub> H <sub>34</sub> N <sub>2</sub> O <sub>2</sub>                |
| Ipidacrine             | Nootropic        | 62732-44-9  |      | C <sub>12</sub> H <sub>16</sub> N <sub>2</sub>                               |
| Ipragratine            | Unclassified     | 22150-28-3  |      | C <sub>20</sub> H <sub>29</sub> NO <sub>3</sub>                              |
| Ipramidil              | Vasodilator      | 83656-38-6  |      | C <sub>10</sub> H <sub>16</sub> N <sub>4</sub> O <sub>4</sub>                |
| Ipratropium            | Bronchodilator   | 60205-81-4  |      | C <sub>20</sub> H <sub>30</sub> NO <sub>3</sub>                              |
| Ipravacaine            | Analgesic        | 166181-63-1 |      | C <sub>18</sub> H <sub>26</sub> N <sub>2</sub> O                             |
| Iprazochrome           | Hemostatic       | 7248-21-7   |      | C <sub>12</sub> H <sub>16</sub> N <sub>4</sub> O <sub>3</sub>                |
| Ipriflavone            | Steroid          | 35212-22-7  |      | C <sub>18</sub> H <sub>16</sub> O <sub>3</sub>                               |
| Iprindole              | Antidepressant   | 5560-72-5   |      | C <sub>19</sub> H <sub>28</sub> N <sub>2</sub>                               |
| Iproclozide            | Antidepressant   | 3544-35-2   |      | C <sub>11</sub> H <sub>15</sub> ClN <sub>2</sub> O <sub>2</sub>              |
| Iprocrolol             | Unclassified     | 37855-80-4  |      | C <sub>18</sub> H <sub>21</sub> NO <sub>6</sub>                              |
| Iproheptine            | Antihistaminic   | 13946-02-6  |      | C <sub>11</sub> H <sub>25</sub> N                                            |
| Iproniazid             | Antidepressant   | 54-92-2     |      | C <sub>9</sub> H <sub>13</sub> N <sub>3</sub> O                              |
| Ipronidazole           | Antiprotozoal    | 14885-29-1  |      | C <sub>7</sub> H <sub>11</sub> N <sub>3</sub> O <sub>2</sub>                 |
| Iprotiazem             | Antihypertensive | 105118-13-6 |      | C <sub>37</sub> H <sub>49</sub> N <sub>3</sub> O <sub>5</sub> S              |
| Iproxamine             | Vasodilator      | 52403-19-7  |      | C <sub>18</sub> H <sub>29</sub> NO <sub>4</sub>                              |
| Iprozilamine           | Unclassified     | 55477-19-5  |      | C <sub>13</sub> H <sub>22</sub> ClN <sub>5</sub> S                           |
| Ipsalazide             | Antiinflammatory | 623571-82-4 |      | C <sub>16</sub> H <sub>13</sub> N <sub>3</sub> O <sub>6</sub>                |
| Ipsapirone             | Anxiolytic       | 95847-70-4  |      | C <sub>19</sub> H <sub>23</sub> N <sub>5</sub> O <sub>3</sub> S              |
| Iquindamine            | Analgesic        | 55299-11-1  |      | C <sub>15</sub> H <sub>23</sub> N <sub>3</sub>                               |
| Iralukast              | Bronchodilator   | 151581-24-7 |      | C <sub>38</sub> H <sub>37</sub> F <sub>3</sub> O <sub>8</sub> S              |
| Irampanel              | Nootropic        | 206260-33-5 |      | C <sub>18</sub> H <sub>19</sub> N <sub>3</sub> O <sub>2</sub>                |
| Irbesartan             | Antihypertensive | 138402-11-6 | Y    | C <sub>25</sub> H <sub>28</sub> N <sub>6</sub> O                             |
| Irindalone             | Antihypertensive | 96478-43-2  |      | C <sub>24</sub> H <sub>29</sub> FN <sub>4</sub> O                            |
| Irinotecan             | Antineoplastic   | 97682-44-5  |      | C <sub>33</sub> H <sub>38</sub> N <sub>4</sub> O <sub>6</sub>                |
| Irloxacin              | Antibiotic       | 91524-15-1  |      | C <sub>16</sub> H <sub>13</sub> FN <sub>2</sub> O <sub>3</sub>               |
| Irofulven              | Antineoplastic   | 158440-71-2 |      | C <sub>15</sub> H <sub>18</sub> O <sub>3</sub>                               |
| Irolapride             | Antiemetic       | 64779-98-2  |      | C <sub>19</sub> H <sub>28</sub> N <sub>2</sub> O <sub>3</sub>                |
| Iroxanadine            | Antihistaminic   | 276690-58-5 |      | C <sub>14</sub> H <sub>20</sub> N <sub>4</sub> O                             |
| Irsogladine            | Anticulcerative  | 57381-26-7  | Y    | C <sub>9</sub> H <sub>7</sub> Cl <sub>2</sub> N <sub>5</sub>                 |
| Irtamazole             | Uricosuric       | 129369-64-8 |      | C <sub>18</sub> H <sub>16</sub> N <sub>4</sub>                               |
| Isaglidole             | Antidiabetic     | 110605-64-6 |      | C <sub>11</sub> H <sub>13</sub> FN <sub>4</sub>                              |
| Isalmadol              | Analgesic        | 269079-62-1 |      | C <sub>22</sub> H <sub>27</sub> NO <sub>4</sub>                              |
| Isalsteine             | Mucolytic        | 116818-99-6 |      | C <sub>14</sub> H <sub>15</sub> NO <sub>6</sub> S                            |
| Isamfazon              | Antiinflammatory | 55902-02-8  |      | C <sub>22</sub> H <sub>23</sub> N <sub>3</sub> O <sub>2</sub>                |
| Isamoltan              | Antidepressant   | 55050-95-8  |      | C <sub>16</sub> H <sub>22</sub> N <sub>2</sub> O <sub>2</sub>                |
| Isamoxole              | Bronchodilator   | 57067-46-6  |      | C <sub>12</sub> H <sub>20</sub> N <sub>2</sub> O <sub>2</sub>                |
| Isatoribine            | Immunomodulator  | 122970-40-5 |      | C <sub>10</sub> H <sub>12</sub> N <sub>4</sub> O <sub>6</sub> S              |
| Isaxonine              | Nootropic        | 4214-72-6   |      | C <sub>7</sub> H <sub>11</sub> N <sub>3</sub>                                |
| Isbogrel               | Antithrombotic   | 89667-40-3  |      | C <sub>18</sub> H <sub>19</sub> NO <sub>2</sub>                              |
| Isbufylline            | Bronchodilator   | 90162-60-0  |      | C <sub>11</sub> H <sub>16</sub> N <sub>4</sub> O <sub>2</sub>                |
| Isepamicin             | Antibacterial    | 58152-03-7  |      | C <sub>22</sub> H <sub>43</sub> N <sub>5</sub> O <sub>12</sub>               |
| Isoaminile             | Antitussive      | 77-51-0     |      | C <sub>16</sub> H <sub>24</sub> N <sub>2</sub>                               |
| Isobromindione         | Anticoagulant    | 1470-35-5   |      | C <sub>15</sub> H <sub>9</sub> BrO <sub>2</sub>                              |
| Isobucaine             | Analgesic        | 14055-89-1  |      | C <sub>15</sub> H <sub>23</sub> NO <sub>2</sub>                              |
| Isobutamben            | Anesthetic       | 94-14-4     |      | C <sub>11</sub> H <sub>15</sub> NO <sub>2</sub>                              |
| Isocarboxazid          | Antidepressant   | 59-63-2     |      | C <sub>12</sub> H <sub>13</sub> N <sub>3</sub> O <sub>2</sub>                |
| Isoconazole            | Antibacterial    | 27523-40-6  |      | C <sub>18</sub> H <sub>14</sub> Cl <sub>4</sub> N <sub>2</sub> O             |
| Isocromil              | Antihistaminic   | 57009-15-1  |      | C <sub>19</sub> H <sub>16</sub> O <sub>5</sub>                               |
| Isocyclamine           | Unclassified     | 105-23-7    |      | C <sub>8</sub> H <sub>17</sub> N                                             |
| Isoetharine            | Bronchodilator   | 530-08-5    |      | C <sub>13</sub> H <sub>21</sub> NO <sub>3</sub>                              |
| Isofezolac             | Antiinflammatory | 50270-33-2  |      | C <sub>23</sub> H <sub>18</sub> N <sub>2</sub> O <sub>2</sub>                |
| Isoflupredone Acetate  | Antiinflammatory | 338-98-7    |      | C <sub>23</sub> H <sub>29</sub> FO <sub>6</sub>                              |
| Isoflurane             | Anesthetic       | 26675-46-7  |      | C <sub>3</sub> H <sub>2</sub> ClF <sub>5</sub> O                             |
| Isoflurophate          | Cholinergic      | 55-91-4     |      | C <sub>6</sub> H <sub>14</sub> FO <sub>3</sub> P                             |
| Isomazole              | Cardiotonic      | 86315-52-8  |      | C <sub>14</sub> H <sub>13</sub> N <sub>3</sub> O <sub>2</sub> S              |
| Isometamidium Chloride | Anthelminthic    | 34301-55-8  |      | C <sub>28</sub> H <sub>26</sub> ClN <sub>7</sub>                             |
| Isomethadone           | Analgesic        | 466-40-0    |      | C <sub>21</sub> H <sub>27</sub> NO                                           |

Table S1. Cont.

| Common Name            | Indication       | CAS Number  | Oral | Molecular Formula                                                             |
|------------------------|------------------|-------------|------|-------------------------------------------------------------------------------|
| Isometheptene          | Antimigraine     | 503-01-5    |      | C <sub>9</sub> H <sub>19</sub> N                                              |
| Isomolpan              | Antipsychotic    | 107320-86-5 |      | C <sub>15</sub> H <sub>21</sub> NO <sub>2</sub>                               |
| Isomylamine            | Muscle Relaxant  | 28815-27-2  |      | C <sub>18</sub> H <sub>35</sub> NO <sub>2</sub>                               |
| Isoniazid              | Antibiotic       | 54-85-3     | Y    | C <sub>6</sub> H <sub>7</sub> N <sub>3</sub> O                                |
| Isonixin               | Analgesic        | 57021-61-1  |      | C <sub>14</sub> H <sub>14</sub> N <sub>2</sub> O <sub>2</sub>                 |
| Isoprazone             | Analgesic        | 56463-68-4  |      | C <sub>15</sub> H <sub>18</sub> N <sub>2</sub> O                              |
| Isoprednidene          | Glucocorticoid   | 17332-61-5  |      | C <sub>22</sub> H <sub>28</sub> O <sub>5</sub>                                |
| Isoprofen              | Antiinflammatory | 57144-56-6  |      | C <sub>15</sub> H <sub>20</sub> O <sub>2</sub>                                |
| Isopropamide           | Antispasmodic    | 7492-32-2   |      | C <sub>23</sub> H <sub>33</sub> N <sub>2</sub> O                              |
| Isopropicillin         | Antibiotic       | 4780-24-9   |      | C <sub>18</sub> H <sub>22</sub> N <sub>2</sub> O <sub>5</sub> S               |
| Isoproterenol          | Bronchodilator   | 7683-59-2   |      | C <sub>11</sub> H <sub>17</sub> NO <sub>3</sub>                               |
| Isosorbide             | Antianginal      | 652-67-5    |      | C <sub>6</sub> H <sub>10</sub> O <sub>4</sub>                                 |
| Isosorbide Dinitrate   | Antianginal      | 87-33-2     | Y    | C <sub>6</sub> H <sub>8</sub> N <sub>2</sub> O <sub>8</sub>                   |
| Isosorbide Mononitrate | Vasodilator      | 16051-77-7  |      | C <sub>6</sub> H <sub>9</sub> NO <sub>6</sub>                                 |
| Isospaglumic Acid      | Nootropic        | 3106-85-2   |      | C <sub>11</sub> H <sub>16</sub> N <sub>2</sub> O <sub>8</sub>                 |
| Isosulpride            | Antipsychotic    | 42792-26-7  |      | C <sub>15</sub> H <sub>23</sub> N <sub>3</sub> O <sub>4</sub> S               |
| Isothipendyl           | Antihistaminic   | 482-15-5    |      | C <sub>16</sub> H <sub>19</sub> N <sub>3</sub> S                              |
| Isotiquimide           | Antiulcerative   | 56717-18-1  |      | C <sub>11</sub> H <sub>14</sub> N <sub>2</sub> S                              |
| Isotretinoin           | Dermatologic     | 4759-48-2   | Y    | C <sub>20</sub> H <sub>28</sub> O <sub>2</sub>                                |
| Isotretinoin Anisatil  | Dermatologic     | 127471-94-7 |      | C <sub>29</sub> H <sub>36</sub> O <sub>4</sub>                                |
| Isovaleramide          | Anxiolytic       | 541-46-8    |      | C <sub>5</sub> H <sub>11</sub> NO                                             |
| Isoxaprolol            | Ophthalmic       | 75949-60-9  |      | C <sub>19</sub> H <sub>26</sub> N <sub>2</sub> O <sub>3</sub>                 |
| Isoxepac               | Antiinflammatory | 55453-87-7  |      | C <sub>16</sub> H <sub>12</sub> O <sub>4</sub>                                |
| Isoxicam               | Antiinflammatory | 34552-84-6  |      | C <sub>14</sub> H <sub>13</sub> N <sub>3</sub> O <sub>5</sub> S               |
| Isosuprine             | Vasodilator      | 395-28-8    |      | C <sub>18</sub> H <sub>23</sub> NO <sub>3</sub>                               |
| Ispinesib Mesylate     | Antineoplastic   | 336113-53-2 |      | C <sub>30</sub> H <sub>33</sub> ClN <sub>4</sub> O <sub>2</sub>               |
| Ispronidine            | Analgesic        | 252870-53-4 | Y    | C <sub>14</sub> H <sub>22</sub> N <sub>2</sub> O                              |
| Isradipine             | Antihypertensive | 75695-93-1  | Y    | C <sub>19</sub> H <sub>21</sub> N <sub>3</sub> O <sub>5</sub>                 |
| Israpafant             | Antithrombotic   | 117279-73-9 |      | C <sub>28</sub> H <sub>29</sub> ClN <sub>4</sub> S                            |
| Istaroxime             | Antiviral        | 203737-93-3 |      | C <sub>21</sub> H <sub>32</sub> N <sub>2</sub> O <sub>3</sub>                 |
| Istradefylline         | Antiparkinsonian | 155270-99-8 | Y    | C <sub>20</sub> H <sub>24</sub> N <sub>4</sub> O <sub>4</sub>                 |
| Itameline              | Antipsychotic    | 145071-44-9 | Y    | C <sub>14</sub> H <sub>15</sub> ClN <sub>2</sub> O <sub>3</sub>               |
| Itanoxone              | Analgesic        | 58182-63-1  |      | C <sub>17</sub> H <sub>13</sub> ClO <sub>3</sub>                              |
| Itasetron              | Antidepressant   | 123258-84-4 |      | C <sub>16</sub> H <sub>20</sub> N <sub>4</sub> O <sub>2</sub>                 |
| Itazigrel              | Anticoagulant    | 70529-35-0  |      | C <sub>18</sub> H <sub>14</sub> F <sub>3</sub> NO <sub>2</sub> S              |
| Itopride               | Gastroprokinetic | 122898-67-3 |      | C <sub>20</sub> H <sub>26</sub> N <sub>2</sub> O <sub>4</sub>                 |
| Itraconazole           | Antifungal       | 84625-61-6  | Y    | C <sub>35</sub> H <sub>38</sub> Cl <sub>2</sub> N <sub>8</sub> O <sub>4</sub> |
| Itriglumide            | Gastroprokinetic | 201605-51-8 |      | C <sub>33</sub> H <sub>38</sub> N <sub>2</sub> O <sub>4</sub>                 |
| Itrocainide            | Antiarrhythmic   | 90828-99-2  |      | C <sub>23</sub> H <sub>27</sub> N <sub>3</sub> O                              |
| Itrocinonide           | Steroid          | 106033-96-9 |      | C <sub>29</sub> H <sub>38</sub> F <sub>2</sub> O <sub>9</sub>                 |
| Ivabradine             | Antihypotensive  | 155974-00-8 | Y    | C <sub>27</sub> H <sub>36</sub> N <sub>2</sub> O <sub>5</sub>                 |
| Ivarimod               | Antiarrhythmic   | 53003-81-9  |      | C <sub>30</sub> H <sub>44</sub> N <sub>2</sub> O <sub>5</sub>                 |
| Ivoqualine             | Anxiolytic       | 72714-75-1  |      | C <sub>20</sub> H <sub>26</sub> N <sub>2</sub> O                              |
| Ixabepilone            | Antineoplastic   | 219989-84-1 |      | C <sub>27</sub> H <sub>42</sub> N <sub>2</sub> O <sub>5</sub> S               |
| Izonsteride            | Antineoplastic   | 176975-26-1 |      | C <sub>24</sub> H <sub>26</sub> N <sub>2</sub> O <sub>5</sub> S <sub>2</sub>  |
| Josamycin              | Antibiotic       | 16846-24-5  | Y    | C <sub>42</sub> H <sub>69</sub> NO <sub>15</sub>                              |
| Kainic Acid            | Anthelminthic    | 487-79-6    |      | C <sub>10</sub> H <sub>15</sub> NO <sub>4</sub>                               |
| Kalafungin             | Antifungal       | 11048-15-0  |      | C <sub>16</sub> H <sub>12</sub> O <sub>6</sub>                                |
| Kanamycin Sulfate      | Antibiotic       | 59-01-8     |      | C <sub>18</sub> H <sub>36</sub> N <sub>4</sub> O <sub>11</sub>                |
| Kebuzone               | Antirheumatic    | 853-34-9    |      | C <sub>19</sub> H <sub>18</sub> N <sub>2</sub> O <sub>3</sub>                 |
| Keracyanin             | Unclassified     | 28338-59-2  |      | C <sub>27</sub> H <sub>31</sub> ClO <sub>15</sub>                             |
| Ketamine               | Anesthetic       | 6740-88-1   |      | C <sub>13</sub> H <sub>16</sub> CINO                                          |
| Ketanserin             | Antihypertensive | 74050-98-9  |      | C <sub>22</sub> H <sub>22</sub> FN <sub>3</sub> O <sub>3</sub>                |
| Ketazocine             | Analgesic        | 36292-69-0  |      | C <sub>18</sub> H <sub>23</sub> NO <sub>2</sub>                               |
| Ketazolam              | Anxiolytic       | 27223-35-4  | Y    | C <sub>20</sub> H <sub>17</sub> ClN <sub>2</sub> O <sub>3</sub>               |
| Kethoxal               | Antiviral        | 27762-78-3  |      | C <sub>6</sub> H <sub>12</sub> O <sub>4</sub>                                 |
| Ketipramine Fumarate   | Antidepressant   | 796-29-2    |      | C <sub>19</sub> H <sub>22</sub> N <sub>2</sub> O                              |
| Ketobemidone           | Analgesic        | 469-79-4    |      | C <sub>15</sub> H <sub>21</sub> NO <sub>2</sub>                               |
| Ketocaine              | Analgesic        | 1092-46-2   |      | C <sub>18</sub> H <sub>29</sub> NO <sub>2</sub>                               |
| Ketocainol             | Antiarrhythmic   | 7488-92-8   |      | C <sub>18</sub> H <sub>31</sub> NO <sub>2</sub>                               |
| Ketoconazole           | Antifungal       | 65277-42-1  | Y    | C <sub>26</sub> H <sub>28</sub> Cl <sub>2</sub> N <sub>4</sub> O <sub>4</sub> |
| Ketoprofen             | Antiinflammatory | 22071-15-4  | Y    | C <sub>16</sub> H <sub>14</sub> O <sub>3</sub>                                |

Table S1. Cont.

| Common Name                      | Indication         | CAS Number   | Oral | Molecular Formula                                                              |
|----------------------------------|--------------------|--------------|------|--------------------------------------------------------------------------------|
| Ketorfanol                       | Analgesic          | 79798-39-3   |      | C <sub>20</sub> H <sub>25</sub> NO <sub>2</sub>                                |
| Ketorolac                        | Analgesic          | 74103-06-3   | Y    | C <sub>15</sub> H <sub>13</sub> NO <sub>3</sub>                                |
| Ketotifen                        | Antihistaminic     | 34580-13-7   | Y    | C <sub>19</sub> H <sub>19</sub> NOS                                            |
| Ketotrexate                      | Antineoplastic     | 52196-22-2   |      | C <sub>21</sub> H <sub>27</sub> N <sub>7</sub> O <sub>6</sub>                  |
| Khellin                          | Vasodilator        | 82-02-0      |      | C <sub>14</sub> H <sub>12</sub> O <sub>5</sub>                                 |
| Khelloside                       | Antihyperlipidemic | 17226-75-4   |      | C <sub>19</sub> H <sub>20</sub> O <sub>10</sub>                                |
| Kitasamycin                      | Antibacterial      | 1392-21-8    |      | C <sub>35</sub> H <sub>59</sub> NO <sub>13</sub>                               |
| Labetalol                        | Antihypertensive   | 36894-69-6   | Y    | C <sub>19</sub> H <sub>24</sub> N <sub>2</sub> O <sub>3</sub>                  |
| Lachesine Chloride               | Unclassified       | 1164-38-1    |      | C <sub>20</sub> H <sub>26</sub> ClNO <sub>3</sub>                              |
| Lacidipine                       | Antihypertensive   | 103890-78-4  | Y    | C <sub>26</sub> H <sub>33</sub> NO <sub>6</sub>                                |
| Lacosamide                       | Antiprotozoal      | 175481-36-4  | Y    | C <sub>13</sub> H <sub>18</sub> N <sub>2</sub> O <sub>3</sub>                  |
| Lactitol                         | Laxative           | 585-86-4     |      | C <sub>12</sub> H <sub>24</sub> O <sub>11</sub>                                |
| Lactulose                        | Laxative           | 4618-18-2    | Y    | C <sub>12</sub> H <sub>22</sub> O <sub>11</sub>                                |
| Ladirubicin                      | Antineoplastic     | 171047-47-5  |      | C <sub>29</sub> H <sub>31</sub> NO <sub>11</sub> S                             |
| Ladostigil Tartrate              | Nootropic          | 209394-27-4  |      | C <sub>16</sub> H <sub>20</sub> N <sub>2</sub> O <sub>2</sub>                  |
| Laflunimus                       | Immunomodulator    | 147076-36-6  |      | C <sub>15</sub> H <sub>13</sub> F <sub>3</sub> N <sub>2</sub> O <sub>2</sub>   |
| Lafutidine                       | Antiulcerative     | 118288-08-7  | Y    | C <sub>22</sub> H <sub>29</sub> N <sub>3</sub> O <sub>4</sub> S                |
| Lagatide                         | Unclassified       | 157476-77-2  |      | C <sub>33</sub> H <sub>58</sub> N <sub>10</sub> O <sub>9</sub>                 |
| Laidlomycin Propionate Potassium | Antibiotic         | 78734-47-1   |      | C <sub>40</sub> H <sub>66</sub> O <sub>13</sub>                                |
| Lamifiban                        | Antithrombotic     | 144412-49-7  |      | C <sub>24</sub> H <sub>28</sub> N <sub>4</sub> O <sub>6</sub>                  |
| Lamivudine                       | Antiviral          | 134678-17-4  | Y    | C <sub>8</sub> H <sub>11</sub> N <sub>3</sub> O <sub>3</sub> S                 |
| Lamotrigine                      | Anticonvulsant     | 84057-84-1   | Y    | C <sub>9</sub> H <sub>7</sub> Cl <sub>2</sub> N <sub>5</sub>                   |
| Lamtidine                        | Antiulcerative     | 73278-54-3   |      | C <sub>18</sub> H <sub>28</sub> N <sub>6</sub> O                               |
| Lanatoside C                     | Cardiotonic        | 17575-22-3   |      | C <sub>49</sub> H <sub>76</sub> O <sub>20</sub>                                |
| Landirolol                       | Antihypertensive   | 133242-30-5  |      | C <sub>25</sub> H <sub>39</sub> N <sub>3</sub> O <sub>8</sub>                  |
| Lanepitant                       | Antiemetic         | 170566-84-4  |      | C <sub>33</sub> H <sub>45</sub> N <sub>5</sub> O <sub>3</sub>                  |
| Lanicemine                       | Nootropic          | 153322-05-5  |      | C <sub>13</sub> H <sub>14</sub> N <sub>2</sub>                                 |
| Laniquidar                       | Antineoplastic     | 197509-46-9  |      | C <sub>37</sub> H <sub>36</sub> N <sub>4</sub> O <sub>3</sub>                  |
| Lanoconazole                     | Antifungal         | 101530-10-3  |      | C <sub>14</sub> H <sub>10</sub> ClN <sub>3</sub> S <sub>2</sub>                |
| Lanperisone                      | Muscle Relaxant    | 116287-14-0  |      | C <sub>15</sub> H <sub>18</sub> F <sub>3</sub> NO                              |
| Lanproston                       | Prostaglandin      | 105674-77-9  |      | C <sub>24</sub> H <sub>31</sub> ClO <sub>7</sub>                               |
| Lansoprazole                     | Antiulcerative     | 103577-45-3  | Y    | C <sub>16</sub> H <sub>14</sub> F <sub>3</sub> N <sub>3</sub> O <sub>2</sub> S |
| Lantanoprost                     | Prostaglandin      | 1402923-77-6 |      | C <sub>30</sub> H <sub>47</sub> BO <sub>5</sub>                                |
| Lapatinib Ditosylate             | Antineoplastic     | 231277-92-2  | Y    | C <sub>29</sub> H <sub>26</sub> ClFN <sub>4</sub> O <sub>4</sub> S             |
| Lapisteride                      | Antineoplastic     | 142139-60-4  |      | C <sub>29</sub> H <sub>40</sub> N <sub>2</sub> O <sub>3</sub>                  |
| Laprafylline                     | Bronchodilator     | 90749-32-9   |      | C <sub>29</sub> H <sub>36</sub> N <sub>6</sub> O <sub>2</sub>                  |
| Laquinimod                       | Nootropic          | 248281-84-7  | Y    | C <sub>19</sub> H <sub>17</sub> ClN <sub>2</sub> O <sub>3</sub>                |
| Lasalocid                        | Antibiotic         | 25999-31-9   |      | C <sub>34</sub> H <sub>54</sub> O <sub>8</sub>                                 |
| Lasinavir                        | Antiviral          | 175385-62-3  |      | C <sub>35</sub> H <sub>53</sub> N <sub>3</sub> O <sub>9</sub>                  |
| Lasofixifene                     | Antineoplastic     | 180916-16-9  |      | C <sub>28</sub> H <sub>31</sub> NO <sub>2</sub>                                |
| Latanoprost                      | Antiglaucoma       | 130209-82-4  |      | C <sub>26</sub> H <sub>40</sub> O <sub>5</sub>                                 |
| Latidectin                       | Antiprotozoal      | 926308-28-3  |      | C <sub>46</sub> H <sub>61</sub> NO <sub>11</sub>                               |
| Laurcetium Bromide               | Unclassified       | 1794-75-8    |      | C <sub>18</sub> H <sub>38</sub> BrNO <sub>2</sub>                              |
| Laureth 10s                      | Contraceptive      | 13081-34-0   |      | C <sub>16</sub> H <sub>34</sub> O <sub>2</sub> S                               |
| Laurixamine                      | Sedative           | 7617-74-5    |      | C <sub>15</sub> H <sub>33</sub> NO                                             |
| Lauroguadine                     | Antiprotozoal      | 135-43-3     |      | C <sub>20</sub> H <sub>36</sub> N <sub>6</sub> O                               |
| Lavoltidine Succinate            | Antiulcerative     | 76956-02-0   |      | C <sub>19</sub> H <sub>29</sub> N <sub>5</sub> O <sub>2</sub>                  |
| Lazabemide                       | Antiparkinsonian   | 103878-84-8  |      | C <sub>8</sub> H <sub>10</sub> ClN <sub>3</sub> O                              |
| Lecimibide                       | Antihyperlipidemic | 130804-35-2  |      | C <sub>34</sub> H <sub>40</sub> F <sub>2</sub> N <sub>4</sub> OS               |
| Leco Zotan                       | Nootropic          | 434283-16-6  |      | C <sub>28</sub> H <sub>29</sub> N <sub>5</sub> O <sub>3</sub>                  |
| Ledazerol                        | Antihypertensive   | 434283-16-6  |      | C <sub>11</sub> H <sub>12</sub> N <sub>2</sub> O <sub>2</sub>                  |
| Ledoxantrone Trihydrochloride    | Antineoplastic     | 113457-05-9  |      | C <sub>21</sub> H <sub>27</sub> N <sub>5</sub> OS                              |
| Lefetamine                       | Analgesic          | 7262-75-1    |      | C <sub>16</sub> H <sub>19</sub> N                                              |
| Leflunomide                      | Antirheumatic      | 75706-12-6   | Y    | C <sub>12</sub> H <sub>19</sub> F <sub>3</sub> N <sub>2</sub> O <sub>2</sub>   |
| Leiopyrrole                      | Unclassified       | 5633-16-9    |      | C <sub>23</sub> H <sub>28</sub> N <sub>2</sub> O                               |
| Lemidosul                        | Unclassified       | 88041-40-1   |      | C <sub>12</sub> H <sub>19</sub> NO <sub>3</sub> S                              |
| Lemildipine                      | Antiarrhythmic     | 94739-29-4   |      | C <sub>20</sub> H <sub>22</sub> Cl <sub>2</sub> N <sub>2</sub> O <sub>6</sub>  |
| Leminoprazole                    | Antiulcerative     | 104340-86-5  |      | C <sub>19</sub> H <sub>23</sub> N <sub>3</sub> OS                              |
| Lemuteporfin                     | Antineoplastic     | 215808-49-4  |      | C <sub>44</sub> H <sub>48</sub> N <sub>4</sub> O <sub>10</sub>                 |
| Lenalidomide                     | Immunomodulator    | 191732-72-6  | Y    | C <sub>13</sub> H <sub>13</sub> N <sub>3</sub> O <sub>3</sub>                  |
| Lenampicillin                    | Antibacterial      | 86273-18-9   |      | C <sub>21</sub> H <sub>23</sub> N <sub>3</sub> O <sub>7</sub> S                |
| Lenapenem                        | Antibacterial      | 149951-16-6  |      | C <sub>18</sub> H <sub>29</sub> N <sub>3</sub> O <sub>5</sub> S                |
| Leniquinsin                      | Antihypertensive   | 10351-50-5   |      | C <sub>20</sub> H <sub>20</sub> N <sub>2</sub> O <sub>4</sub>                  |

Table S1. Cont.

| Common Name                | Indication           | CAS Number  | Oral | Molecular Formula                                                              |
|----------------------------|----------------------|-------------|------|--------------------------------------------------------------------------------|
| Lenperone                  | Antipsychotic        | 24678-13-5  |      | C <sub>22</sub> H <sub>23</sub> F <sub>2</sub> N <sub>2</sub> O <sub>2</sub>   |
| Leptacline                 | Antihypertensive     | 5005-72-1   |      | C <sub>12</sub> H <sub>23</sub> N                                              |
| Lercanidipine              | Antihypertensive     | 100427-26-7 | Y    | C <sub>36</sub> H <sub>41</sub> N <sub>3</sub> O <sub>6</sub>                  |
| Lergotrile                 | Pituitary            | 36945-03-6  |      | C <sub>17</sub> H <sub>18</sub> ClN <sub>3</sub>                               |
| Lerisetron                 | Antiemetic           | 143257-98-1 |      | C <sub>18</sub> H <sub>20</sub> N <sub>4</sub>                                 |
| Lesopitron                 | Anxiolytic           | 132449-46-8 |      | C <sub>15</sub> H <sub>21</sub> ClN <sub>6</sub>                               |
| Lestaurtinib               | Antineoplastic       | 111358-88-4 |      | C <sub>26</sub> H <sub>21</sub> N <sub>3</sub> O <sub>4</sub>                  |
| Leteprenim                 | Nootropic            | 138117-50-7 |      | C <sub>15</sub> H <sub>13</sub> N <sub>5</sub> O <sub>4</sub>                  |
| Lethane Ethyl Thiocyanate) | Anesthetic           | 112-56-1    |      | C <sub>9</sub> H <sub>17</sub> NO <sub>2</sub> S                               |
| Letimide                   | Analgesic            | 26513-90-6  |      | C <sub>14</sub> H <sub>18</sub> N <sub>2</sub> O <sub>3</sub>                  |
| Letosteine                 | Mucolytic            | 53943-88-7  | Y    | C <sub>10</sub> H <sub>17</sub> NO <sub>4</sub> S <sub>2</sub>                 |
| Letrazuril                 | Antibacterial        | 103337-74-2 |      | C <sub>17</sub> H <sub>9</sub> Cl <sub>2</sub> FN <sub>4</sub> O <sub>2</sub>  |
| Letrozole                  | Antineoplastic       | 112809-51-5 | Y    | C <sub>17</sub> H <sub>11</sub> N <sub>5</sub>                                 |
| Leucinocaine               | Analgesic            | 92-23-9     |      | C <sub>17</sub> H <sub>28</sub> N <sub>2</sub> O <sub>2</sub>                  |
| Leucocianidol              | Capillary Protectant | 480-17-1    |      | C <sub>15</sub> H <sub>14</sub> O <sub>7</sub>                                 |
| Leucovorin                 | Antidote             | 58-05-9     |      | C <sub>20</sub> H <sub>23</sub> N <sub>7</sub> O <sub>7</sub>                  |
| Leurubicin                 | Antineoplastic       | 70774-25-3  |      | C <sub>33</sub> H <sub>40</sub> N <sub>2</sub> O <sub>12</sub>                 |
| Levalbuterol               | Bronchodilator       | 34391-04-3  |      | C <sub>13</sub> H <sub>21</sub> NO <sub>3</sub>                                |
| Levallorphan               | Antidote             | 152-02-3    |      | C <sub>19</sub> H <sub>25</sub> NO                                             |
| Levamphetamine Succinate   | Anorexic             | 156-34-3    |      | C <sub>9</sub> H <sub>13</sub> N                                               |
| Levamisole                 | Anthelmintic         | 14769-73-4  |      | C <sub>11</sub> H <sub>12</sub> N <sub>2</sub> S                               |
| Levcromakalim              | Antihypertensive     | 94535-50-9  |      | C <sub>16</sub> H <sub>18</sub> N <sub>2</sub> O <sub>3</sub>                  |
| Levcycloserine             | Antibacterial        | 339-72-0    |      | C <sub>3</sub> H <sub>6</sub> N <sub>2</sub> O <sub>2</sub>                    |
| Levobutamine Lactobionate  | Cardiotonic          | 61661-06-1  |      | C <sub>18</sub> H <sub>23</sub> NO <sub>3</sub>                                |
| Levobutamine Lactobionate  | Cardiotonic          | 96-82-2     |      | C <sub>12</sub> H <sub>22</sub> O <sub>12</sub>                                |
| Levemopamil                | Antiarrhythmic       | 101238-51-1 |      | C <sub>23</sub> H <sub>30</sub> N <sub>2</sub>                                 |
| Levetiracetam              | Anticonvulsant       | 102767-28-2 | Y    | C <sub>8</sub> H <sub>14</sub> N <sub>2</sub> O <sub>2</sub>                   |
| Levisoprenaline            | Bronchodilator       | 51-31-0     |      | C <sub>11</sub> H <sub>17</sub> NO <sub>3</sub>                                |
| Levlofedidine              | Antihypertensive     | 81447-78-1  |      | C <sub>11</sub> H <sub>12</sub> Cl <sub>2</sub> N <sub>2</sub> O               |
| Levmetamfetamine           | Decongestant         | 33817-09-3  |      | C <sub>10</sub> H <sub>15</sub> N                                              |
| Levobetaxolol              | Antihypertensive     | 93221-48-8  |      | C <sub>18</sub> H <sub>29</sub> NO <sub>3</sub>                                |
| Levobunolol                | Antiglaucoma         | 47141-42-4  |      | C <sub>17</sub> H <sub>25</sub> NO <sub>3</sub>                                |
| Levobupivacaine            | Anesthetic           | 27262-47-1  |      | C <sub>18</sub> H <sub>28</sub> N <sub>2</sub> O                               |
| Levocabastine              | Antihistaminic       | 79516-68-0  |      | C <sub>26</sub> H <sub>29</sub> FN <sub>2</sub> O <sub>2</sub>                 |
| Levocetirizine             | Antihistaminic       | 130018-77-8 | Y    | C <sub>21</sub> H <sub>25</sub> ClN <sub>2</sub> O <sub>3</sub>                |
| Levodopa                   | Antiparkinsonian     | 59-92-7     | Y    | C <sub>9</sub> H <sub>11</sub> NO <sub>4</sub>                                 |
| Levodropropizine           | Antitussive          | 99291-25-5  | Y    | C <sub>13</sub> H <sub>20</sub> N <sub>2</sub> O <sub>2</sub>                  |
| Levofacetoperane           | Anorexic             | 24558-01-8  |      | C <sub>14</sub> H <sub>19</sub> NO <sub>2</sub>                                |
| Levofenfluramine           | Anorexic             | 37577-24-5  |      | C <sub>12</sub> H <sub>16</sub> F <sub>3</sub> N                               |
| Levofloxacin               | Antibiotic           | 100986-85-4 | Y    | C <sub>18</sub> H <sub>20</sub> FN <sub>3</sub> O <sub>4</sub>                 |
| Levofuraltadone            | Antibacterial        | 3795-88-8   |      | C <sub>13</sub> H <sub>16</sub> N <sub>4</sub> O <sub>6</sub>                  |
| Levolansoprazole           | Antilulcerative      | 138530-95-7 |      | C <sub>16</sub> H <sub>14</sub> F <sub>3</sub> N <sub>3</sub> O <sub>2</sub> S |
| Levoleucovorin Calcium     | Antidote             | 68538-85-2  | Y    | C <sub>20</sub> H <sub>23</sub> N <sub>7</sub> O <sub>7</sub>                  |
| Levomenol                  | Antiarrhythmic       | 23089-26-1  |      | C <sub>15</sub> H <sub>26</sub> O                                              |
| Levomenthol                | Dermatologic         | 2216-51-5   |      | C <sub>10</sub> H <sub>20</sub> O                                              |
| Levomepromazine            | Analgesic            | 60-99-1     |      | C <sub>19</sub> H <sub>24</sub> N <sub>2</sub> OS                              |
| Levomethadone              | Analgesic            | 125-58-6    |      | C <sub>21</sub> H <sub>27</sub> NO                                             |
| Levomethadyl Acetate       | Analgesic            | 1477-40-3   |      | C <sub>23</sub> H <sub>31</sub> NO <sub>2</sub>                                |
| Levomethorphan             | Antitussive          | 125-70-2    |      | C <sub>18</sub> H <sub>25</sub> NO                                             |
| Levometiomeprazine         | Analgesic            | 1759-09-7   |      | C <sub>19</sub> H <sub>24</sub> N <sub>2</sub> S <sub>2</sub>                  |
| Levomoprolol               | Antihypertensive     | 77164-20-6  |      | C <sub>13</sub> H <sub>21</sub> NO <sub>3</sub>                                |
| Levomoramide               | Analgesic            | 5666-11-5   |      | C <sub>25</sub> H <sub>32</sub> N <sub>2</sub> O <sub>2</sub>                  |
| Levonantradol              | Analgesic            | 71048-87-8  |      | C <sub>27</sub> H <sub>35</sub> NO <sub>4</sub>                                |
| Levonordefrin              | Antihypertensive     | 829-74-3    |      | C <sub>9</sub> H <sub>13</sub> NO <sub>3</sub>                                 |
| Levonorgestrel             | Progestogen          | 797-63-7    | Y    | C <sub>21</sub> H <sub>28</sub> O <sub>2</sub>                                 |
| Levophenacilmorphan        | Analgesic            | 10061-32-2  |      | C <sub>24</sub> H <sub>27</sub> NO <sub>2</sub>                                |
| Levopropoxyphene           | Antitussive          | 2338-37-6   |      | C <sub>22</sub> H <sub>29</sub> NO <sub>2</sub>                                |
| Levopropylcillin           | Antibacterial        | 3736-12-7   |      | C <sub>18</sub> H <sub>22</sub> N <sub>2</sub> O <sub>5</sub> S                |
| Levopropylhexedrine        | Adrenergic           | 6192-97-8   |      | C <sub>10</sub> H <sub>21</sub> N                                              |
| Levoprotiline              | Antidepressant       | 76496-68-9  |      | C <sub>20</sub> H <sub>23</sub> NO                                             |
| Levormeloxifene            | Estrogen             | 78994-23-7  |      | C <sub>30</sub> H <sub>35</sub> NO <sub>3</sub>                                |
| Levorphanol                | Analgesic            | 77-07-6     | Y    | C <sub>17</sub> H <sub>23</sub> NO                                             |
| Levosalbutamol             | Bronchodilator       | 34391-04-3  | Y    | C <sub>13</sub> H <sub>21</sub> NO <sub>3</sub>                                |



Table S1. Cont.

| Common Name                 | Indication                | CAS Number  | Oral | Molecular Formula                                                               |
|-----------------------------|---------------------------|-------------|------|---------------------------------------------------------------------------------|
| Levosemotiadil              | Antiarrhythmic            | 116476-16-5 |      | C <sub>29</sub> H <sub>32</sub> N <sub>2</sub> O <sub>6</sub> S                 |
| Levosimendan                | Cardiotonic               | 141505-33-1 |      | C <sub>14</sub> H <sub>12</sub> N <sub>6</sub> O                                |
| Levosulpiride               | Antidepressant            | 23672-07-3  | Y    | C <sub>15</sub> H <sub>23</sub> N <sub>3</sub> O <sub>4</sub> S                 |
| Levotofisopam               | Anxiolytic                | 82059-51-6  |      | C <sub>22</sub> H <sub>26</sub> N <sub>2</sub> O <sub>4</sub>                   |
| Levoxadrol                  | Anesthetic                | 4792-18-1   |      | C <sub>20</sub> H <sub>23</sub> NO <sub>2</sub>                                 |
| Lexacalcitol                | Dermatologic              | 131875-08-6 |      | C <sub>29</sub> H <sub>48</sub> O <sub>4</sub>                                  |
| Lexipafant                  | Anticoagulant             | 139133-26-9 |      | C <sub>23</sub> H <sub>30</sub> N <sub>4</sub> O <sub>4</sub> S                 |
| Lexithromycin               | Antibacterial             | 53066-26-5  |      | C <sub>38</sub> H <sub>70</sub> N <sub>2</sub> O <sub>13</sub>                  |
| Lexofenac                   | Antiinflammatory          | 41387-02-4  |      | C <sub>14</sub> H <sub>14</sub> O <sub>3</sub>                                  |
| Liarozole                   | Antineoplastic            | 115575-11-6 |      | C <sub>17</sub> H <sub>13</sub> ClN <sub>4</sub>                                |
| Libecillide                 | Unclassified              | 27826-45-5  |      | C <sub>23</sub> H <sub>32</sub> N <sub>4</sub> O <sub>7</sub> S                 |
| Libenzapril                 | Antihypertensive          | 109214-55-3 |      | C <sub>18</sub> H <sub>25</sub> N <sub>3</sub> O <sub>5</sub>                   |
| Licarbazepine               | Anticonvulsant            | 29331-92-8  |      | C <sub>15</sub> H <sub>14</sub> N <sub>2</sub> O <sub>2</sub>                   |
| Licofelone                  | Antiinflammatory          | 156897-06-2 |      | C <sub>23</sub> H <sub>22</sub> ClNO <sub>2</sub>                               |
| Licostinel                  | Antipsychotic             | 153504-81-5 |      | C <sub>8</sub> H <sub>3</sub> Cl <sub>2</sub> N <sub>3</sub> O <sub>4</sub>     |
| Lidadronic Acid             | Bone Resorption Inhibitor | 63132-38-7  |      | C <sub>5</sub> H <sub>16</sub> N <sub>2</sub> O <sub>6</sub> P <sub>2</sub>     |
| Lidamide                    | Antidiarrheal             | 66871-56-5  |      | C <sub>11</sub> H <sub>16</sub> N <sub>4</sub> O                                |
| Lidanserin                  | Anxiolytic                | 73725-85-6  |      | C <sub>26</sub> H <sub>31</sub> FN <sub>2</sub> O <sub>4</sub>                  |
| Lidocaine                   | Anesthetic                | 137-58-6    |      | C <sub>14</sub> H <sub>22</sub> N <sub>2</sub> O                                |
| Lidoflazine                 | Vasodilator               | 3416-26-0   |      | C <sub>30</sub> H <sub>35</sub> F <sub>2</sub> N <sub>3</sub> O                 |
| Lidorestat                  | Antidiabetic              | 245116-90-9 |      | C <sub>18</sub> H <sub>11</sub> F <sub>3</sub> N <sub>2</sub> O <sub>2</sub> S  |
| Lifarizine                  | Anticoagulant             | 119514-66-8 |      | C <sub>29</sub> H <sub>32</sub> N <sub>4</sub>                                  |
| Lifibrate                   | Antihyperlipidemic        | 22204-91-7  |      | C <sub>20</sub> H <sub>21</sub> Cl <sub>2</sub> NO <sub>4</sub>                 |
| Lifibrol                    | Antihyperlipidemic        | 96609-16-4  |      | C <sub>21</sub> H <sub>26</sub> O <sub>4</sub>                                  |
| Lilopristone                | Abortifacient             | 97747-88-1  |      | C <sub>29</sub> H <sub>37</sub> NO <sub>3</sub>                                 |
| Limaprost                   | Prostaglandin             | 74397-12-9  | Y    | C <sub>22</sub> H <sub>36</sub> O <sub>5</sub>                                  |
| Limazocic                   | Hepatoprotectant          | 128620-82-6 |      | C <sub>8</sub> H <sub>13</sub> NO <sub>3</sub> S <sub>2</sub>                   |
| Linaprazan                  | Antiulcerative            | 248919-64-4 |      | C <sub>21</sub> H <sub>26</sub> F <sub>4</sub> O <sub>2</sub>                   |
| Linarotene                  | Dermatologic              | 127304-28-3 |      | C <sub>23</sub> H <sub>30</sub> N <sub>2</sub> O <sub>2</sub> S                 |
| Lincomycin                  | Antibiotic                | 154-21-2    |      | C <sub>18</sub> H <sub>34</sub> N <sub>2</sub> O <sub>6</sub> S                 |
| Lindane                     | Dermatologic              | 58-89-9     |      | C <sub>6</sub> H <sub>6</sub> Cl <sub>6</sub>                                   |
| Linetastine                 | Antihistaminic            | 159776-68-8 |      | C <sub>35</sub> H <sub>40</sub> N <sub>2</sub> O <sub>6</sub>                   |
| Linezolid                   | Antibiotic                | 165800-03-3 | Y    | C <sub>16</sub> H <sub>20</sub> FN <sub>3</sub> O <sub>4</sub>                  |
| Linogiride                  | Antidiabetic              | 75358-37-1  |      | C <sub>16</sub> H <sub>22</sub> N <sub>4</sub> O                                |
| Linopirdine                 | Nootropic                 | 105431-72-9 |      | C <sub>26</sub> H <sub>21</sub> N <sub>3</sub> O                                |
| Linotroban                  | Antithrombotic            | 120824-08-0 |      | C <sub>14</sub> H <sub>15</sub> NO <sub>5</sub> S <sub>2</sub>                  |
| Linsidomine                 | Antianginal               | 33876-97-0  | Y    | C <sub>6</sub> H <sub>10</sub> N <sub>4</sub> O <sub>2</sub>                    |
| Lintitript                  | Gastroprokinetic          | 136381-85-6 |      | C <sub>20</sub> H <sub>14</sub> ClN <sub>3</sub> O <sub>5</sub> S               |
| Lintopride                  | Antipsychotic             | 107429-63-0 |      | C <sub>14</sub> H <sub>19</sub> ClN <sub>4</sub> O <sub>2</sub>                 |
| Liothyronine                | Thyroid                   | 6893-02-3   | Y    | C <sub>15</sub> H <sub>12</sub> I <sub>3</sub> NO <sub>4</sub>                  |
| Lipoic Acid, Alpha          | Antidote                  | 1200-22-2   |      | C <sub>8</sub> H <sub>14</sub> O <sub>2</sub> S <sub>2</sub>                    |
| Liranaftate                 | Antifungal                | 88678-31-3  |      | C <sub>18</sub> H <sub>20</sub> N <sub>2</sub> O <sub>2</sub> S                 |
| Lirequinil                  | Sedative                  | 143943-73-1 |      | C <sub>26</sub> H <sub>25</sub> ClN <sub>2</sub> O <sub>3</sub>                 |
| Lirexapride                 | Antipsychotic             | 145414-12-6 |      | C <sub>24</sub> H <sub>36</sub> ClN <sub>3</sub> O <sub>2</sub>                 |
| Lirimilast                  | Antiinflammatory          | 329306-27-6 |      | C <sub>17</sub> H <sub>12</sub> Cl <sub>2</sub> N <sub>2</sub> O <sub>6</sub> S |
| Lioldine                    | Mydriatic                 | 105102-20-3 |      | C <sub>20</sub> H <sub>20</sub> F <sub>2</sub> N <sub>4</sub>                   |
| Lisadimate                  | Dermatologic              | 136-44-7    |      | C <sub>10</sub> H <sub>13</sub> NO <sub>4</sub>                                 |
| Lisdexamfetamine Dimesylate | Nootropic                 | 608137-32-2 | Y    | C <sub>15</sub> H <sub>25</sub> N <sub>3</sub> O                                |
| Lisinopril                  | Antihypertensive          | 76547-98-3  | Y    | C <sub>21</sub> H <sub>31</sub> N <sub>3</sub> O <sub>5</sub>                   |
| Lisofylline                 | Immunomodulator           | 100324-81-0 |      | C <sub>13</sub> H <sub>20</sub> N <sub>4</sub> O <sub>3</sub>                   |
| Lisuride                    | Antimigraine              | 18016-80-3  | Y    | C <sub>20</sub> H <sub>26</sub> N <sub>4</sub> O                                |
| Lithium Carbonate           | Sedative                  | 463-79-6    | Y    | CH <sub>2</sub> O <sub>3</sub>                                                  |
| Litomeglvir                 | Antiviral                 | 321915-31-5 |      | C <sub>25</sub> H <sub>30</sub> N <sub>4</sub> O <sub>5</sub> S                 |
| Litoxetine                  | Antidepressant            | 86811-09-8  |      | C <sub>16</sub> H <sub>19</sub> NO                                              |
| Litracen                    | Antidepressant            | 5118-30-9   |      | C <sub>20</sub> H <sub>23</sub> N                                               |
| Lixazinone Sulfate          | Cardiotonic               | 94192-59-3  |      | C <sub>21</sub> H <sub>28</sub> N <sub>4</sub> O <sub>3</sub>                   |
| Lixivaptan                  | Plasma Volume Expander    | 168079-32-1 | Y    | C <sub>27</sub> H <sub>21</sub> ClFN <sub>3</sub> O <sub>2</sub>                |
| Lobeline                    | Respiratory Stimulant     | 90-69-7     |      | C <sub>22</sub> H <sub>27</sub> NO <sub>2</sub>                                 |
| Lobendazole                 | Anthelmintic              | 6306-71-4   |      | C <sub>10</sub> H <sub>11</sub> N <sub>3</sub> O <sub>2</sub>                   |
| Lobenzarit                  | Antirheumatic             | 63329-53-3  | Y    | C <sub>14</sub> H <sub>10</sub> ClNO <sub>4</sub>                               |
| Lobucavir                   | Antiviral                 | 127759-89-1 |      | C <sub>11</sub> H <sub>15</sub> N <sub>5</sub> O <sub>3</sub>                   |
| Lobuprofen                  | Analgesic                 | 98207-12-6  |      | C <sub>25</sub> H <sub>33</sub> ClN <sub>2</sub> O <sub>2</sub>                 |
| Locicortolone Dicibate      | Glucocorticoid            | 78467-68-2  |      | C <sub>36</sub> H <sub>50</sub> Cl <sub>2</sub> O <sub>5</sub>                  |

Table S1. Cont.

| Common Name           | Indication         | CAS Number  | Oral | Molecular Formula                                                               |
|-----------------------|--------------------|-------------|------|---------------------------------------------------------------------------------|
| Lodaxaprine           | Antineoplastic     | 93181-81-8  |      | C <sub>15</sub> H <sub>16</sub> ClN <sub>3</sub> O                              |
| Lodazecar             | Antihyperlipidemic | 87646-83-1  |      | C <sub>22</sub> H <sub>24</sub> BrClN <sub>4</sub> O <sub>4</sub>               |
| Lodelaben             | Antirheumatic      | 111149-90-7 |      | C <sub>25</sub> H <sub>41</sub> ClO <sub>3</sub>                                |
| Lodenosine            | Antiviral          | 110143-10-7 |      | C <sub>10</sub> H <sub>12</sub> FN <sub>5</sub> O <sub>2</sub>                  |
| Lodinixil             | Antihypertensive   | 86627-50-1  |      | C <sub>14</sub> H <sub>17</sub> ClN <sub>4</sub>                                |
| Lodiperone            | Adrenergic         | 72444-63-4  |      | C <sub>21</sub> H <sub>20</sub> Cl <sub>2</sub> FN <sub>3</sub> O <sub>2</sub>  |
| Lodoxamide            | Antihistaminic     | 53882-12-5  |      | C <sub>11</sub> H <sub>6</sub> ClN <sub>3</sub> O <sub>6</sub>                  |
| Lofemizole            | Antiinflammatory   | 65571-68-8  |      | C <sub>10</sub> H <sub>9</sub> ClN <sub>2</sub>                                 |
| Lofendazam            | Anxiolytic         | 29176-29-2  |      | C <sub>15</sub> H <sub>13</sub> ClN <sub>2</sub> O                              |
| Lofentanil Oxalate    | Analgesic          | 61380-40-3  |      | C <sub>25</sub> H <sub>32</sub> N <sub>2</sub> O <sub>3</sub>                   |
| Lofepamine            | Antidepressant     | 23047-25-8  | Y    | C <sub>26</sub> H <sub>27</sub> ClN <sub>2</sub> O                              |
| Lofexidine            | Antihypertensive   | 31036-80-3  | Y    | C <sub>11</sub> H <sub>12</sub> Cl <sub>2</sub> N <sub>2</sub> O                |
| Loflucarban           | Antifungal         | 790-69-2    |      | C <sub>13</sub> H <sub>9</sub> Cl <sub>2</sub> FN <sub>2</sub> S                |
| Lombazole             | Antibacterial      | 60628-98-0  |      | C <sub>22</sub> H <sub>17</sub> ClN <sub>2</sub>                                |
| Lomefloxacin          | Antibiotic         | 98079-51-7  |      | C <sub>17</sub> H <sub>19</sub> F <sub>2</sub> N <sub>3</sub> O <sub>3</sub>    |
| Lomeguatrib           | Antineoplastic     | 192441-08-0 |      | C <sub>10</sub> H <sub>8</sub> BrN <sub>5</sub> OS                              |
| Lomerizine            | Antimigraine       | 101477-55-8 | Y    | C <sub>27</sub> H <sub>30</sub> F <sub>2</sub> N <sub>2</sub> O <sub>3</sub>    |
| Lometraline           | Antipsychotic      | 34910-85-5  |      | C <sub>13</sub> H <sub>18</sub> ClNO                                            |
| Lometrexol Sodium     | Antineoplastic     | 106400-81-1 |      | C <sub>21</sub> H <sub>25</sub> N <sub>5</sub> O <sub>6</sub>                   |
| Lomevactone           | Antidote           | 81478-25-3  |      | C <sub>18</sub> H <sub>17</sub> ClO <sub>2</sub>                                |
| Lomifylline           | Bronchodilator     | 10226-54-7  |      | C <sub>13</sub> H <sub>18</sub> N <sub>4</sub> O <sub>3</sub>                   |
| Lomofungin            | Antifungal         | 26786-84-5  |      | C <sub>15</sub> H <sub>10</sub> N <sub>2</sub> O <sub>6</sub>                   |
| Lomustine             | Antineoplastic     | 13010-47-4  | Y    | C <sub>9</sub> H <sub>16</sub> ClN <sub>3</sub> O <sub>2</sub>                  |
| Lonafarnib            | Antineoplastic     | 193275-84-2 |      | C <sub>27</sub> H <sub>31</sub> Br <sub>2</sub> ClN <sub>4</sub> O <sub>2</sub> |
| Lonapalene            | Dermatologic       | 91431-42-4  |      | C <sub>16</sub> H <sub>15</sub> ClO <sub>6</sub>                                |
| Lonaprofen            | Analgesic          | 41791-49-5  |      | C <sub>14</sub> H <sub>13</sub> ClO <sub>3</sub>                                |
| Lonazolac             | Antiinflammatory   | 53808-88-1  |      | C <sub>17</sub> H <sub>13</sub> ClN <sub>2</sub> O <sub>2</sub>                 |
| Lonidamine            | Antineoplastic     | 50264-69-2  | Y    | C <sub>15</sub> H <sub>10</sub> Cl <sub>2</sub> N <sub>2</sub> O <sub>2</sub>   |
| Loperamide            | Antidiarrheal      | 53179-11-6  | Y    | C <sub>29</sub> H <sub>33</sub> ClN <sub>2</sub> O <sub>2</sub>                 |
| Loperamide Oxide      | Antidiarrheal      | 106900-12-3 |      | C <sub>29</sub> H <sub>33</sub> ClN <sub>2</sub> O <sub>3</sub>                 |
| Lopinavir             | Antiviral          | 192725-17-0 | Y    | C <sub>37</sub> H <sub>48</sub> N <sub>4</sub> O <sub>5</sub>                   |
| Lopirazepam           | Sedative           | 42863-81-0  |      | C <sub>14</sub> H <sub>9</sub> Cl <sub>2</sub> N <sub>3</sub> O <sub>2</sub>    |
| Loprazolam            | Sedative           | 61197-73-7  |      | C <sub>23</sub> H <sub>21</sub> ClN <sub>6</sub> O <sub>3</sub>                 |
| Loprodolol            | Muscle Relaxant    | 2209-86-1   |      | C <sub>5</sub> H <sub>10</sub> Cl <sub>2</sub> O <sub>2</sub>                   |
| Loracarbef            | Antibiotic         | 76470-66-1  | Y    | C <sub>16</sub> H <sub>16</sub> ClN <sub>3</sub> O <sub>4</sub>                 |
| Lorajmine             | Antiarrhythmic     | 47562-08-3  |      | C <sub>22</sub> H <sub>27</sub> ClN <sub>2</sub> O <sub>3</sub>                 |
| Lorapride             | Antipsychotic      | 68677-06-5  |      | C <sub>14</sub> H <sub>22</sub> ClN <sub>3</sub> O <sub>3</sub> S               |
| Loratadine            | Antihistaminic     | 79794-75-5  | Y    | C <sub>22</sub> H <sub>23</sub> ClN <sub>2</sub> O <sub>2</sub>                 |
| Lorazepam             | Anxiolytic         | 846-49-1    | Y    | C <sub>15</sub> H <sub>10</sub> Cl <sub>2</sub> N <sub>2</sub> O <sub>2</sub>   |
| Lorbamate             | Muscle Relaxant    | 24353-88-6  |      | C <sub>12</sub> H <sub>22</sub> N <sub>2</sub> O <sub>4</sub>                   |
| Lorcainide            | Antiarrhythmic     | 59729-31-6  |      | C <sub>22</sub> H <sub>27</sub> ClN <sub>2</sub> O                              |
| Lorcinaldol           | Analgesic          | 104719-71-3 |      | C <sub>17</sub> H <sub>19</sub> ClN <sub>4</sub>                                |
| Loreclezole           | Anticonvulsant     | 117857-45-1 |      | C <sub>10</sub> H <sub>6</sub> Cl <sub>3</sub> N <sub>3</sub>                   |
| Lormetazepam          | Sedative           | 848-75-9    | Y    | C <sub>16</sub> H <sub>12</sub> Cl <sub>2</sub> N <sub>2</sub> O <sub>2</sub>   |
| Lornoxicam            | Analgesic          | 70374-39-9  | Y    | C <sub>13</sub> H <sub>10</sub> ClN <sub>3</sub> O <sub>4</sub> S <sub>2</sub>  |
| Lorpiprazole          | Antipsychotic      | 108785-69-9 |      | C <sub>21</sub> H <sub>26</sub> F <sub>3</sub> N <sub>5</sub>                   |
| Lortalamine           | Antidepressant     | 70384-91-7  |      | C <sub>15</sub> H <sub>17</sub> ClN <sub>2</sub> O <sub>2</sub>                 |
| Lorzafone             | Sedative           | 59179-95-2  |      | C <sub>18</sub> H <sub>17</sub> Cl <sub>2</sub> N <sub>3</sub> O <sub>3</sub>   |
| Losartan              | Antihypertensive   | 114798-26-4 | Y    | C <sub>22</sub> H <sub>23</sub> ClN <sub>6</sub> O                              |
| Losigamone            | Anticonvulsant     | 112856-44-7 |      | C <sub>12</sub> H <sub>11</sub> ClO <sub>4</sub>                                |
| Losindole             | Antidepressant     | 69175-77-5  |      | C <sub>19</sub> H <sub>20</sub> ClN                                             |
| Losmipifen            | Analgesic          | 74168-08-4  |      | C <sub>17</sub> H <sub>15</sub> ClO <sub>4</sub>                                |
| Losoxantrone          | Antineoplastic     | 88303-60-0  |      | C <sub>22</sub> H <sub>27</sub> N <sub>5</sub> O <sub>4</sub>                   |
| Losulazine            | Antihypertensive   | 72141-57-2  |      | C <sub>27</sub> H <sub>22</sub> F <sub>4</sub> N <sub>4</sub> O <sub>3</sub> S  |
| Loteprednol Etabonate | Antiinflammatory   | 82034-46-6  |      | C <sub>24</sub> H <sub>31</sub> ClO <sub>7</sub>                                |
| Lotifazole            | Antiinflammatory   | 71119-10-3  |      | C <sub>12</sub> H <sub>9</sub> Cl <sub>3</sub> N <sub>2</sub> O <sub>2</sub> S  |
| Lotrafiban            | Antithrombotic     | 171049-14-2 |      | C <sub>23</sub> H <sub>32</sub> N <sub>4</sub> O <sub>4</sub>                   |
| Lotrifen              | Abortifacient      | 66535-86-2  |      | C <sub>16</sub> H <sub>10</sub> ClN <sub>3</sub>                                |
| Lotucaine             | Anesthetic         | 42373-58-0  |      | C <sub>18</sub> H <sub>29</sub> NO <sub>2</sub>                                 |
| Lovastatin            | Antihyperlipidemic | 75330-75-5  | Y    | C <sub>24</sub> H <sub>36</sub> O <sub>5</sub>                                  |
| Loviride              | Antiviral          | 147362-57-0 |      | C <sub>17</sub> H <sub>16</sub> Cl <sub>2</sub> N <sub>2</sub> O <sub>2</sub>   |
| Loxanast              | Unclassified       | 69915-62-4  |      | C <sub>14</sub> H <sub>26</sub> O <sub>2</sub>                                  |
| Loxapine              | Anxiolytic         | 1977-10-2   | Y    | C <sub>18</sub> H <sub>18</sub> ClN <sub>3</sub> O                              |

Table S1. Cont.

| Common Name                | Indication         | CAS Number  | Oral | Molecular Formula                                                                            |
|----------------------------|--------------------|-------------|------|----------------------------------------------------------------------------------------------|
| Loxiglumide                | Gastroprokinetic   | 107097-80-3 |      | C <sub>21</sub> H <sub>30</sub> Cl <sub>2</sub> N <sub>2</sub> O <sub>5</sub>                |
| Loxoprofen                 | Antiinflammatory   | 68767-14-6  | Y    | C <sub>15</sub> H <sub>18</sub> O <sub>3</sub>                                               |
| Lozilurea                  | Ant ulcerative     | 71475-35-9  |      | C <sub>10</sub> H <sub>13</sub> ClN <sub>2</sub> O                                           |
| Lubazodone                 | Antidepressant     | 161178-07-0 |      | C <sub>14</sub> H <sub>18</sub> FNO <sub>2</sub>                                             |
| Lubeluzole                 | Nootropic          | 144665-07-6 |      | C <sub>22</sub> H <sub>25</sub> F <sub>2</sub> N <sub>3</sub> O <sub>2</sub> S               |
| Lubiprostone               | Laxative           | 333963-40-9 | Y    | C <sub>20</sub> H <sub>32</sub> F <sub>2</sub> O <sub>5</sub>                                |
| Lucanthone                 | Anthelminthic      | 479-50-5    |      | C <sub>20</sub> H <sub>24</sub> N <sub>2</sub> OS                                            |
| Lucartamide                | Antimigraine       | 76743-10-7  |      | C <sub>12</sub> H <sub>16</sub> N <sub>2</sub> S <sub>2</sub>                                |
| Lucimycin                  | Antibiotic         | 13058-67-8  |      | C <sub>36</sub> H <sub>53</sub> NO <sub>13</sub>                                             |
| Lufenuron                  | Ectoparasiticide   | 103055-07-8 |      | C <sub>17</sub> H <sub>18</sub> Cl <sub>2</sub> F <sub>8</sub> N <sub>2</sub> O <sub>3</sub> |
| Lufironil                  | Dermatologic       | 128075-79-6 |      | C <sub>13</sub> H <sub>19</sub> N <sub>3</sub> O <sub>4</sub>                                |
| Lufuradom                  | Unclassified       | 94006-14-1  |      | C <sub>22</sub> H <sub>20</sub> FN <sub>3</sub> O <sub>2</sub>                               |
| Luliconazole               | Antifungal         | 187164-19-8 |      | C <sub>14</sub> H <sub>9</sub> Cl <sub>2</sub> N <sub>3</sub> S <sub>2</sub>                 |
| Lumefantrine               | Antimalarial       | 82186-77-4  |      | C <sub>30</sub> H <sub>32</sub> Cl <sub>3</sub> NO                                           |
| Lumiracoxib                | Antirheumatic      | 220991-20-8 | Y    | C <sub>15</sub> H <sub>13</sub> ClFNO <sub>2</sub>                                           |
| Lupitidine                 | Antihistaminic     | 83903-06-4  |      | C <sub>21</sub> H <sub>27</sub> N <sub>5</sub> O <sub>2</sub> S                              |
| Luprostiol                 | Prostaglandin      | 67110-79-6  |      | C <sub>21</sub> H <sub>29</sub> ClO <sub>6</sub> S                                           |
| Lurasidone                 | Antipsychotic      | 367514-87-2 | Y    | C <sub>28</sub> H <sub>36</sub> N <sub>4</sub> O <sub>2</sub> S                              |
| Lurosetron Mesylate        | Antiemetic         | 128486-54-4 |      | C <sub>17</sub> H <sub>17</sub> FN <sub>4</sub> O                                            |
| Lurtotecan Dihydrochloride | Antineoplastic     | 149882-10-0 |      | C <sub>28</sub> H <sub>30</sub> N <sub>4</sub> O <sub>6</sub>                                |
| Lusaperidone               | Antipsychotic      | 214548-46-6 |      | C <sub>22</sub> H <sub>21</sub> N <sub>3</sub> O <sub>2</sub>                                |
| Luxabendazole              | Anthelminthic      | 90509-02-7  |      | C <sub>15</sub> H <sub>12</sub> FN <sub>3</sub> O <sub>5</sub> S                             |
| Lycetamine                 | Antibacterial      | 60209-20-3  |      | C <sub>22</sub> H <sub>47</sub> N <sub>3</sub> O                                             |
| Lydimycin                  | Antifungal         | 10118-85-1  |      | C <sub>10</sub> H <sub>14</sub> N <sub>2</sub> O <sub>3</sub> S                              |
| Lymecycline                | Antibiotic         | 992-21-2    |      | C <sub>29</sub> H <sub>38</sub> N <sub>4</sub> O <sub>10</sub>                               |
| Lynestrenol                | Progestogen        | 52-76-6     |      | C <sub>20</sub> H <sub>28</sub> O                                                            |
| Lysergide                  | Antidepressant     | 50-37-3     |      | C <sub>20</sub> H <sub>25</sub> N <sub>3</sub> O                                             |
| Mabuprofen                 | Analgesic          | 82821-47-4  |      | C <sub>15</sub> H <sub>23</sub> NO <sub>2</sub>                                              |
| Mabuterol                  | Bronchodilator     | 56341-08-3  |      | C <sub>13</sub> H <sub>18</sub> ClF <sub>3</sub> N <sub>2</sub> O                            |
| Maduramicin                | Antibacterial      | 79356-08-4  |      | C <sub>47</sub> H <sub>80</sub> O <sub>17</sub>                                              |
| Mafenide                   | Antibiotic         | 138-39-6    |      | C <sub>7</sub> H <sub>10</sub> N <sub>2</sub> O <sub>2</sub> S                               |
| Mafopezazine               | Antipsychotic      | 80428-29-1  |      | C <sub>22</sub> H <sub>28</sub> FN <sub>3</sub> O <sub>3</sub>                               |
| Mafofamide                 | Antineoplastic     | 88859-04-5  |      | C <sub>9</sub> H <sub>19</sub> Cl <sub>2</sub> N <sub>2</sub> O <sub>5</sub> PS <sub>2</sub> |
| Malathion                  | Ectoparasiticide   | 121-75-5    |      | C <sub>10</sub> H <sub>19</sub> O <sub>6</sub> PS <sub>2</sub>                               |
| Maleylsulfathiazole        | Antibiotic         | 515-57-1    |      | C <sub>13</sub> H <sub>11</sub> N <sub>3</sub> O <sub>5</sub> S <sub>2</sub>                 |
| Malotilate                 | Hepatic Protectant | 59937-28-9  |      | C <sub>12</sub> H <sub>16</sub> O <sub>4</sub> S <sub>2</sub>                                |
| Mandelic Acid              | Dermatologic       | 90-64-2     |      | C <sub>8</sub> H <sub>8</sub> O <sub>3</sub>                                                 |
| Manidipine 6300            | Vasodilator        | 89226-50-6  |      | C <sub>33</sub> H <sub>38</sub> N <sub>4</sub> O <sub>6</sub>                                |
| Manifaxine                 | Antidepressant     | 135306-39-7 |      | C <sub>12</sub> H <sub>15</sub> F <sub>2</sub> NO <sub>2</sub>                               |
| Manitimus                  | Immunomodulator    | 202057-76-9 |      | C <sub>15</sub> H <sub>11</sub> F <sub>3</sub> N <sub>2</sub> O <sub>2</sub>                 |
| Mannitol                   | Diuretic           | 69-65-8     |      | C <sub>6</sub> H <sub>14</sub> O <sub>6</sub>                                                |
| Mannitol Hexantrate        | Vasodilator        | 15825-70-4  |      | C <sub>6</sub> H <sub>8</sub> N <sub>6</sub> O <sub>18</sub>                                 |
| Mannomustine               | Antineoplastic     | 576-68-1    |      | C <sub>10</sub> H <sub>22</sub> Cl <sub>2</sub> N <sub>2</sub> O <sub>4</sub>                |
| Mannosulfan                | Antineoplastic     | 7518-35-6   |      | C <sub>10</sub> H <sub>22</sub> O <sub>14</sub> S <sub>4</sub>                               |
| Manozodil                  | Unclassified       | 77528-67-7  |      | C <sub>10</sub> H <sub>16</sub> N <sub>2</sub> S                                             |
| Mantabegron                | Antidiabetic       | 36144-08-8  |      | C <sub>19</sub> H <sub>27</sub> NO <sub>2</sub>                                              |
| Mapinastine                | Antihistaminic     | 140945-32-0 |      | C <sub>23</sub> H <sub>34</sub> N <sub>6</sub> O                                             |
| Maprotiline                | Antidepressant     | 10262-69-8  | Y    | C <sub>20</sub> H <sub>23</sub> N                                                            |
| Maraviroc                  | Antiviral          | 376348-65-1 | Y    | C <sub>29</sub> H <sub>41</sub> F <sub>2</sub> N <sub>5</sub> O                              |
| Marbofloxacin              | Antibiotic         | 115550-35-1 |      | C <sub>17</sub> H <sub>19</sub> FN <sub>4</sub> O <sub>4</sub>                               |
| Maribavir                  | Antiviral          | 176161-24-3 | Y    | C <sub>15</sub> H <sub>19</sub> N <sub>3</sub> O <sub>4</sub> Cl <sub>2</sub>                |
| Marimastat                 | Antineoplastic     | 154039-60-8 |      | C <sub>15</sub> H <sub>29</sub> N <sub>3</sub> O <sub>5</sub>                                |
| Mariptiline                | Antidepressant     | 60070-14-6  |      | C <sub>18</sub> H <sub>18</sub> N <sub>2</sub> O                                             |
| Maropitant Citrate         | Antiemetic         | 147116-67-4 |      | C <sub>32</sub> H <sub>40</sub> N <sub>2</sub> O                                             |
| Maroxepin                  | Antidepressant     | 65509-24-2  |      | C <sub>19</sub> H <sub>19</sub> NO                                                           |
| Masoprocol                 | Antineoplastic     | 27686-84-6  |      | C <sub>18</sub> H <sub>22</sub> O <sub>4</sub>                                               |
| Mavacoxib                  | Antiinflammatory   | 170569-88-7 |      | C <sub>16</sub> H <sub>11</sub> F <sub>4</sub> N <sub>3</sub> O <sub>2</sub> S               |
| Maxacalcitol               | Dermatologic       | 103909-75-7 |      | C <sub>26</sub> H <sub>42</sub> O <sub>4</sub>                                               |
| Maytansine                 | Antineoplastic     | 35846-53-8  |      | C <sub>34</sub> H <sub>46</sub> ClN <sub>3</sub> O <sub>10</sub>                             |
| Mazapertine Succinate      | Antipsychotic      | 134208-17-6 |      | C <sub>26</sub> H <sub>35</sub> N <sub>3</sub> O <sub>2</sub>                                |
| Mazaticol                  | Antiparkinsonian   | 42024-98-6  |      | C <sub>21</sub> H <sub>27</sub> NO <sub>3</sub> S <sub>2</sub>                               |
| Mazindol                   | Anorexic           | 22232-71-9  | Y    | C <sub>16</sub> H <sub>13</sub> ClN <sub>2</sub> O                                           |
| Mazipredone                | Antiinflammatory   | 13085-08-0  |      | C <sub>26</sub> H <sub>38</sub> N <sub>2</sub> O <sub>4</sub>                                |

Table S1. Cont.

| Common Name                     | Indication           | CAS Number  | Oral | Molecular Formula                                                              |
|---------------------------------|----------------------|-------------|------|--------------------------------------------------------------------------------|
| Mazokalim                       | Antihypertensive     | 164178-54-5 |      | C <sub>23</sub> H <sub>28</sub> N <sub>6</sub> O <sub>6</sub>                  |
| Mebanazine                      | Antipsychotic        | 65-64-5     |      | C <sub>8</sub> H <sub>12</sub> N <sub>2</sub>                                  |
| Mebendazole                     | Anthelminthic        | 31431-39-7  | Y    | C <sub>16</sub> H <sub>13</sub> N <sub>3</sub> O <sub>3</sub>                  |
| Mebezoside                      | Capillary Protectant | 55902-93-7  |      | C <sub>28</sub> H <sub>32</sub> O <sub>6</sub>                                 |
| Mebeverine                      | Antispasmodic        | 3625-06-7   | Y    | C <sub>25</sub> H <sub>35</sub> NO <sub>5</sub>                                |
| Mebezonium Iodide               | Antitussive          | 7681-78-9   |      | C <sub>19</sub> H <sub>40</sub> I <sub>2</sub> N <sub>2</sub>                  |
| Mebhydrolin                     | Antihistaminic       | 524-81-2    |      | C <sub>19</sub> H <sub>20</sub> N <sub>2</sub>                                 |
| Mebiquine                       | Antidiarrheal        | 23910-07-8  |      | C <sub>10</sub> H <sub>10</sub> BiNO <sub>3</sub>                              |
| Mebolazine                      | Antianginal          | 3625-07-8   |      | C <sub>42</sub> H <sub>68</sub> N <sub>2</sub> O <sub>2</sub>                  |
| Mebutamate                      | Antihypertensive     | 64-55-1     |      | C <sub>10</sub> H <sub>20</sub> N <sub>2</sub> O <sub>4</sub>                  |
| Mebutizide                      | Diuretic             | 3568-00-1   |      | C <sub>13</sub> H <sub>20</sub> ClN <sub>3</sub> O <sub>4</sub> S <sub>2</sub> |
| Mecamylamine                    | Antihypertensive     | 60-40-2     |      | C <sub>11</sub> H <sub>21</sub> N                                              |
| Mecarbonate                     | Antihypertensive     | 15574-49-9  |      | C <sub>13</sub> H <sub>15</sub> NO <sub>3</sub>                                |
| Mechlorethamine                 | Antineoplastic       | 51-75-2     |      | C <sub>5</sub> H <sub>11</sub> Cl <sub>2</sub> N                               |
| Meciadanol                      | Antiulcerative       | 65350-86-9  |      | C <sub>16</sub> H <sub>16</sub> O <sub>6</sub>                                 |
| Mecinarone                      | Vasodilator          | 26225-59-2  |      | C <sub>24</sub> H <sub>27</sub> NO <sub>6</sub>                                |
| Meclinetant                     | Antineoplastic       | 146362-70-1 |      | C <sub>32</sub> H <sub>31</sub> ClN <sub>4</sub> O <sub>5</sub>                |
| Meclizine                       | Antiemetic           | 569-65-3    | Y    | C <sub>25</sub> H <sub>27</sub> ClN <sub>2</sub>                               |
| Meclocycline                    | Antibacterial        | 2013-58-3   |      | C <sub>22</sub> H <sub>21</sub> ClN <sub>2</sub> O <sub>8</sub>                |
| Meclofenamic Acid               | Antiinflammatory     | 644-62-2    |      | C <sub>14</sub> H <sub>11</sub> Cl <sub>2</sub> NO <sub>2</sub>                |
| Meclofenoxate                   | Nootropic            | 51-68-3     |      | C <sub>12</sub> H <sub>16</sub> ClNO <sub>3</sub>                              |
| Meclonazepam                    | Sedative             | 58662-84-3  |      | C <sub>16</sub> H <sub>12</sub> ClN <sub>3</sub> O <sub>3</sub>                |
| Mecloqualone                    | Sedative             | 340-57-8    |      | C <sub>15</sub> H <sub>11</sub> ClN <sub>2</sub> O                             |
| Mecloralurea                    | Anxiolytic           | 1954-79-6   |      | C <sub>4</sub> H <sub>7</sub> Cl <sub>3</sub> N <sub>2</sub> O <sub>2</sub>    |
| Meclorison DIBUTYRATE           | Antiinflammatory     | 10549-91-4  |      | C <sub>30</sub> H <sub>40</sub> Cl <sub>2</sub> O <sub>6</sub>                 |
| Meclozamine                     | Sedative             | 5668-06-4   |      | C <sub>19</sub> H <sub>24</sub> ClNO                                           |
| Mecrylate                       | Dermatologic         | 137-05-3    |      | C <sub>5</sub> H <sub>5</sub> NO <sub>2</sub>                                  |
| Mecysteine                      | Mucolytic            | 2485-62-3   |      | C <sub>4</sub> H <sub>9</sub> NO <sub>2</sub> S                                |
| Medazepam                       | Sedative             | 2898-12-6   | Y    | C <sub>16</sub> H <sub>15</sub> ClN <sub>2</sub>                               |
| Medazomide                      | Antitussive          | 300-22-1    |      | C <sub>6</sub> H <sub>9</sub> N <sub>3</sub> O <sub>2</sub>                    |
| Medetomidine                    | Analgesic            | 86347-14-0  |      | C <sub>13</sub> H <sub>16</sub> N <sub>2</sub>                                 |
| Medibazine                      | Vasodilator          | 53-31-6     |      | C <sub>25</sub> H <sub>26</sub> N <sub>2</sub> O <sub>2</sub>                  |
| Medifoxamine                    | Antidepressant       | 32359-34-5  |      | C <sub>16</sub> H <sub>19</sub> NO <sub>2</sub>                                |
| Medorinone                      | Cardiotonic          | 88296-61-1  |      | C <sub>9</sub> H <sub>8</sub> N <sub>2</sub> O                                 |
| Medorubicin                     | Antineoplastic       | 64314-52-9  |      | C <sub>26</sub> H <sub>27</sub> NO <sub>10</sub>                               |
| Medrogestone                    | Progestogen          | 977-79-7    |      | C <sub>23</sub> H <sub>32</sub> O <sub>2</sub>                                 |
| Medroxalol                      | Antihypertensive     | 56290-94-9  |      | C <sub>20</sub> H <sub>24</sub> N <sub>2</sub> O <sub>5</sub>                  |
| Medroxyprogesterone Acetate     | Progestogen          | 71-58-9     | Y    | C <sub>24</sub> H <sub>34</sub> O <sub>4</sub>                                 |
| Medrylamine                     | Antihistaminic       | 524-99-2    |      | C <sub>18</sub> H <sub>23</sub> NO <sub>2</sub>                                |
| Medryson                        | Glucocorticoid       | 2668-66-8   |      | C <sub>22</sub> H <sub>32</sub> O <sub>3</sub>                                 |
| Mefeclozazine                   | Unclassified         | 1243-33-0   |      | C <sub>20</sub> H <sub>25</sub> ClN <sub>2</sub> O <sub>2</sub>                |
| Mefenamic Acid                  | Antiinflammatory     | 61-68-7     | Y    | C <sub>15</sub> H <sub>15</sub> NO <sub>2</sub>                                |
| Mefenidil                       | Vasodilator          | 58261-91-9  |      | C <sub>12</sub> H <sub>11</sub> N <sub>3</sub>                                 |
| Mefenidramium Metilsulfate      | Unclassified         | 4858-60-0   |      | C <sub>19</sub> H <sub>27</sub> NO <sub>5</sub> S                              |
| Mefenorex                       | Anorexic             | 17243-57-1  |      | C <sub>12</sub> H <sub>18</sub> ClN                                            |
| Mefeserpine                     | Antihypertensive     | 3735-85-1   |      | C <sub>32</sub> H <sub>38</sub> N <sub>2</sub> O <sub>8</sub>                  |
| Mefexamide                      | Nootropic            | 1227-61-8   |      | C <sub>15</sub> H <sub>24</sub> N <sub>2</sub> O <sub>3</sub>                  |
| Mefloquine                      | Antimalarial         | 53230-10-7  | Y    | C <sub>17</sub> H <sub>16</sub> F <sub>6</sub> N <sub>2</sub> O                |
| Mefruside                       | Diuretic             | 7195-27-9   |      | C <sub>13</sub> H <sub>19</sub> ClN <sub>2</sub> O <sub>5</sub> S <sub>2</sub> |
| Megalomicin Potassium Phosphate | Antibacterial        | 28022-11-9  |      | C <sub>44</sub> H <sub>80</sub> N <sub>2</sub> O <sub>15</sub>                 |
| Megestrol Acetate               | Progestogen          | 595-33-5    | Y    | C <sub>24</sub> H <sub>32</sub> O <sub>4</sub>                                 |
| Meglitinide                     | Antidiabetic         | 54870-28-9  |      | C <sub>17</sub> H <sub>16</sub> ClNO <sub>4</sub>                              |
| Meglucycline                    | Antibiotic           | 31770-79-3  |      | C <sub>29</sub> H <sub>37</sub> N <sub>3</sub> O <sub>13</sub>                 |
| Meglumine                       | Antiprotozoal        | 6284-40-8   | Y    | C <sub>7</sub> H <sub>17</sub> NO <sub>5</sub>                                 |
| Meglumine Metrizoate            | Antiprotozoal        | 1949-45-7   |      | C <sub>12</sub> H <sub>11</sub> I <sub>3</sub> N <sub>2</sub> O <sub>4</sub>   |
| Meglutol                        | Antihyperlipidemic   | 503-49-1    |      | C <sub>6</sub> H <sub>10</sub> O <sub>5</sub>                                  |
| Meladrazine                     | Anorexic             | 13957-36-3  |      | C <sub>11</sub> H <sub>23</sub> N <sub>7</sub>                                 |
| Melagatran                      | Antithrombotic       | 159776-70-2 |      | C <sub>22</sub> H <sub>31</sub> N <sub>5</sub> O <sub>4</sub>                  |
| Melarsomine                     | Antiprotozoal        | 128470-15-5 |      | C <sub>13</sub> H <sub>21</sub> AsN <sub>8</sub> S <sub>2</sub>                |
| Melarsonyl Potassium            | Antiprotozoal        | 37526-80-0  |      | C <sub>13</sub> H <sub>13</sub> AsN <sub>6</sub> O <sub>4</sub> S <sub>2</sub> |
| Melarsoprol                     | Antiprotozoal        | 494-79-1    |      | C <sub>12</sub> H <sub>15</sub> AsN <sub>6</sub> OS <sub>2</sub>               |
| Meldonium                       | Antiarrhythmic       | 76144-81-5  | Y    | C <sub>6</sub> H <sub>14</sub> N <sub>2</sub> O <sub>2</sub>                   |
| Melengestrol Acetate            | Antineoplastic       | 2919-66-6   |      | C <sub>25</sub> H <sub>32</sub> O <sub>4</sub>                                 |

Table S1. Cont.

| Common Name             | Indication            | CAS Number  | Oral | Molecular Formula                                                             |
|-------------------------|-----------------------|-------------|------|-------------------------------------------------------------------------------|
| Meletimide              | Antihypertensive      | 14745-50-7  |      | C <sub>24</sub> H <sub>28</sub> N <sub>2</sub> O <sub>2</sub>                 |
| Melevodopa              | Antiparkinsonian      | 7101-51-1   |      | C <sub>10</sub> H <sub>13</sub> NO <sub>4</sub>                               |
| Melinamide              | Antihyperlipidemic    | 14417-88-0  |      | C <sub>26</sub> H <sub>41</sub> NO                                            |
| Melitracen              | Antidepressant        | 5118-29-6   |      | C <sub>21</sub> H <sub>25</sub> N                                             |
| Melizame                | Unclassified          | 26921-72-2  |      | C <sub>7</sub> H <sub>6</sub> N <sub>4</sub> O <sub>2</sub>                   |
| Meloxicam               | Antiinflammatory      | 71125-38-7  | Y    | C <sub>14</sub> H <sub>13</sub> N <sub>3</sub> O <sub>4</sub> S <sub>2</sub>  |
| Melperone               | Antipsychotic         | 3575-80-2   |      | C <sub>16</sub> H <sub>22</sub> FNO                                           |
| Melphalan               | Antineoplastic        | 148-82-3    | Y    | C <sub>13</sub> H <sub>18</sub> Cl <sub>2</sub> N <sub>2</sub> O <sub>2</sub> |
| Melquinast              | Bronchodilator        | 87611-28-7  |      | C <sub>15</sub> H <sub>16</sub> N <sub>4</sub> O <sub>3</sub>                 |
| Meluadrine              | Antihistamine         | 134865-33-1 |      | C <sub>12</sub> H <sub>18</sub> ClNO <sub>2</sub>                             |
| Memantine               | Antiparkinsonian      | 19982-08-2  | Y    | C <sub>12</sub> H <sub>21</sub> N                                             |
| Memotine                | Antiviral             | 18429-69-1  |      | C <sub>17</sub> H <sub>17</sub> NO <sub>2</sub>                               |
| Menabitan               | Analgesic             | 83784-21-8  |      | C <sub>37</sub> H <sub>56</sub> N <sub>2</sub> O <sub>3</sub>                 |
| Menbutone               | Choleric              | 3562-99-0   |      | C <sub>13</sub> H <sub>14</sub> O <sub>4</sub>                                |
| Menfegol                | Contraceptive         | 57821-32-6  |      | C <sub>18</sub> H <sub>28</sub> O <sub>2</sub>                                |
| Menglytate              | Unclassified          | 579-94-2    |      | C <sub>14</sub> H <sub>26</sub> O <sub>3</sub>                                |
| Menitrazepam            | Sedative              | 28781-64-8  |      | C <sub>16</sub> H <sub>17</sub> N <sub>3</sub> O <sub>3</sub>                 |
| Menoctone               | Antimalarial          | 14561-42-3  |      | C <sub>24</sub> H <sub>32</sub> O <sub>3</sub>                                |
| Menogaril               | Antineoplastic        | 71628-96-1  |      | C <sub>28</sub> H <sub>31</sub> NO <sub>10</sub>                              |
| Menthyl Salicylate      | Dermatologic          | 89-46-3     |      | C <sub>17</sub> H <sub>24</sub> O <sub>3</sub>                                |
| Meobentine Sulfate      | Antiarrhythmic        | 46464-11-3  |      | C <sub>11</sub> H <sub>17</sub> N <sub>3</sub> O                              |
| Meparfynol              | Sedative              | 77-75-8     |      | C <sub>6</sub> H <sub>10</sub> O                                              |
| Mepazine Acetate        | Antipsychotic         | 60-89-9     |      | C <sub>19</sub> H <sub>22</sub> N <sub>2</sub> S                              |
| Mepenzolate             | Antispasmodic         | 25990-43-6  | Y    | C <sub>21</sub> H <sub>26</sub> NO <sub>3</sub> +                             |
| Meperidine              | Analgesic             | 57-42-1     | Y    | C <sub>15</sub> H <sub>21</sub> NO <sub>2</sub>                               |
| Mephenesin              | Muscle Relaxant       | 59-47-2     |      | C <sub>10</sub> H <sub>14</sub> O <sub>3</sub>                                |
| Mephenesin Carbamate    | Muscle Relaxant       | 533-06-2    |      | C <sub>11</sub> H <sub>15</sub> NO <sub>4</sub>                               |
| Mephenoxalone           | Muscle Relaxant       | 70-07-5     |      | C <sub>11</sub> H <sub>13</sub> NO <sub>4</sub>                               |
| Mephentermine           | Antihypotensive       | 100-92-5    |      | C <sub>11</sub> H <sub>17</sub> N                                             |
| Mephenytoin             | Anticonvulsant        | 50-12-4     | Y    | C <sub>12</sub> H <sub>14</sub> N <sub>2</sub> O <sub>2</sub>                 |
| Mephobarbital           | Anticonvulsant        | 115-38-8    | Y    | C <sub>13</sub> H <sub>14</sub> N <sub>2</sub> O <sub>3</sub>                 |
| Mepindolol              | Antianginal           | 23694-81-7  | Y    | C <sub>15</sub> H <sub>22</sub> N <sub>2</sub> O <sub>2</sub>                 |
| Mepiperphenidol Bromide | Diuretic              | 520-20-7    |      | C <sub>19</sub> H <sub>32</sub> BrNO                                          |
| Mepiprazole             | Sedative              | 20326-12-9  |      | C <sub>16</sub> H <sub>21</sub> ClN <sub>4</sub>                              |
| Mepiroxol               | Antiinflammatory      | 6968-72-5   |      | C <sub>6</sub> H <sub>7</sub> NO <sub>2</sub>                                 |
| Mepitiostane            | Oxytocic              | 21362-69-6  |      | C <sub>25</sub> H <sub>40</sub> O <sub>2</sub> S                              |
| Mepivacaine             | Anesthetic            | 96-88-8     |      | C <sub>15</sub> H <sub>22</sub> N <sub>2</sub> O                              |
| Mepixanox               | Respiratory Stimulant | 17854-59-0  |      | C <sub>20</sub> H <sub>21</sub> NO <sub>3</sub>                               |
| Mepramidil              | Antihypotensive       | 23891-60-3  |      | C <sub>28</sub> H <sub>33</sub> NO <sub>5</sub>                               |
| Meprednisone            | Glucocorticoid        | 1247-42-3   |      | C <sub>22</sub> H <sub>28</sub> O <sub>5</sub>                                |
| Meproamate              | Sedative              | 57-53-4     |      | C <sub>9</sub> H <sub>18</sub> N <sub>2</sub> O <sub>4</sub>                  |
| Meprochol               | Steroid               | 590-31-8    |      | C <sub>7</sub> H <sub>16</sub> NO.Br                                          |
| Meproscillarín          | Cardiotonic           | 33396-37-1  |      | C <sub>31</sub> H <sub>44</sub> O <sub>8</sub>                                |
| Meprotixol              | Antitussive           | 4295-63-0   |      | C <sub>19</sub> H <sub>23</sub> NO <sub>2</sub> S                             |
| Meprylcaine             | Anesthetic            | 495-70-5    |      | C <sub>14</sub> H <sub>21</sub> NO <sub>2</sub>                               |
| Meptazinol              | Analgesic             | 54340-58-8  | Y    | C <sub>15</sub> H <sub>23</sub> NO                                            |
| Mequidox                | Antibacterial         | 16915-79-0  |      | C <sub>10</sub> H <sub>10</sub> N <sub>2</sub> O <sub>3</sub>                 |
| Mequinol                | Dermatologic          | 150-76-5    |      | C <sub>7</sub> H <sub>8</sub> O <sub>2</sub>                                  |
| Mequitamium Iodide      | Antihistaminic        | 101396-42-3 |      | C <sub>21</sub> H <sub>25</sub> N <sub>2</sub> SI                             |
| Mequitazine             | Antihistaminic        | 29216-28-2  | Y    | C <sub>20</sub> H <sub>22</sub> N <sub>2</sub> S                              |
| Meradimate              | Dermatologic          | 134-09-8    |      | C <sub>17</sub> H <sub>25</sub> NO <sub>2</sub>                               |
| Merafloxacin            | Antibiotic            | 91188-00-0  |      | C <sub>19</sub> H <sub>23</sub> F <sub>2</sub> N <sub>3</sub> O <sub>3</sub>  |
| Meragidone Sodium       | Antipsychotic         | 792128-03-1 |      | C <sub>10</sub> H <sub>13</sub> HgNO <sub>5</sub>                             |
| Merbromin               | Antibacterial         | 55728-51-3  |      | C <sub>20</sub> H <sub>10</sub> B <sub>2</sub> HgO <sub>6</sub>               |
| Mercaptopurine          | Antineoplastic        | 50-44-2     | Y    | C <sub>5</sub> H <sub>4</sub> N <sub>4</sub> S                                |
| Mercurobutol            | Antifungal            | 498-73-7    |      | C <sub>10</sub> H <sub>13</sub> ClHgO                                         |
| Mergocriptine           | Antimigraine          | 81968-16-3  |      | C <sub>33</sub> H <sub>43</sub> N <sub>5</sub> O <sub>5</sub>                 |
| Meribendan              | Cardiotonic           | 119322-27-9 |      | C <sub>15</sub> H <sub>14</sub> N <sub>6</sub> O                              |
| Merimepodib             | Antiviral             | 198821-22-6 |      | C <sub>23</sub> H <sub>24</sub> N <sub>4</sub> O <sub>6</sub>                 |
| Meropenem               | Antibacterial         | 96036-03-2  |      | C <sub>17</sub> H <sub>25</sub> N <sub>3</sub> O <sub>5</sub> S               |
| Mesabolone              | Steroid               | 7483-09-2   |      | C <sub>26</sub> H <sub>40</sub> O <sub>3</sub>                                |
| Mesalamine              | Antiinflammatory      | 89-57-6     | Y    | C <sub>7</sub> H <sub>7</sub> NO <sub>3</sub>                                 |
| Meseclazone             | Antiinflammatory      | 29053-27-8  |      | C <sub>11</sub> H <sub>10</sub> ClNO <sub>3</sub>                             |

Table S1. Cont.

| Common Name            | Indication       | CAS Number  | Oral | Molecular Formula                                                              |
|------------------------|------------------|-------------|------|--------------------------------------------------------------------------------|
| Mesna                  | Mucolytic        | 3375-50-6   |      | C <sub>2</sub> H <sub>6</sub> O <sub>3</sub> S <sub>2</sub>                    |
| Mesocarb               | Nootropic        | 34262-84-5  |      | C <sub>18</sub> H <sub>18</sub> N <sub>4</sub> O <sub>2</sub>                  |
| Mesoridazine           | Antipsychotic    | 5588-33-0   |      | C <sub>21</sub> H <sub>26</sub> N <sub>2</sub> O <sub>5</sub> S <sub>2</sub>   |
| Mespirenone            | Pituitary        | 87952-98-5  |      | C <sub>25</sub> H <sub>30</sub> O <sub>4</sub> S                               |
| Mestanolone            | Androgen         | 521-11-9    |      | C <sub>20</sub> H <sub>32</sub> O <sub>2</sub>                                 |
| Mesterolone            | Androgen         | 1424-00-6   | Y    | C <sub>20</sub> H <sub>32</sub> O <sub>2</sub>                                 |
| Mestilbol              | Estrogen         | 7773-60-6   |      | C <sub>19</sub> H <sub>22</sub> O <sub>2</sub>                                 |
| Mestranol              | Estrogen         | 72-33-3     |      | C <sub>21</sub> H <sub>26</sub> O <sub>2</sub>                                 |
| Mesudipine             | Antianginal      | 62658-88-2  |      | C <sub>19</sub> H <sub>24</sub> N <sub>2</sub> O <sub>4</sub> S                |
| Mesulegine             | Antidepressant   | 64795-35-3  |      | C <sub>18</sub> H <sub>26</sub> N <sub>4</sub> O <sub>2</sub> S                |
| Mesulfamide            | Antibiotic       | 122-89-4    |      | C <sub>7</sub> H <sub>10</sub> N <sub>2</sub> O <sub>5</sub> S <sub>2</sub>    |
| Mesulfen               | Ectoparasiticide | 135-58-0    |      | C <sub>14</sub> H <sub>12</sub> S <sub>2</sub>                                 |
| Mesuprine              | Vasodilator      | 7541-30-2   |      | C <sub>19</sub> H <sub>26</sub> N <sub>2</sub> O <sub>5</sub> S                |
| Metabutethamine        | Anesthetic       | 4439-25-2   |      | C <sub>13</sub> H <sub>20</sub> N <sub>2</sub> O <sub>2</sub>                  |
| Metabutoxycaine        | Anesthetic       | 3624-87-1   |      | C <sub>17</sub> H <sub>28</sub> N <sub>2</sub> O <sub>3</sub>                  |
| Metacetamol            | Analgesic        | 621-42-1    |      | C <sub>8</sub> H <sub>9</sub> NO <sub>2</sub>                                  |
| Metaclazepam           | Anxiolytic       | 84031-17-4  |      | C <sub>18</sub> H <sub>18</sub> BrClN <sub>2</sub> O                           |
| Metaglycodol           | Sedative         | 13980-94-4  |      | C <sub>11</sub> H <sub>15</sub> ClO <sub>2</sub>                               |
| Metahexamide           | Antidiabetic     | 565-33-3    |      | C <sub>14</sub> H <sub>21</sub> N <sub>3</sub> O <sub>3</sub> S                |
| Metahomomenthol        | Unclassified     | 17162-28-6  |      | C <sub>15</sub> H <sub>28</sub> O <sub>3</sub>                                 |
| Metalol                | Antihypertensive | 7701-65-7   |      | C <sub>11</sub> H <sub>18</sub> N <sub>2</sub> O <sub>3</sub> S                |
| Metamelfalan           | Antineoplastic   | 1088-80-8   |      | C <sub>13</sub> H <sub>18</sub> Cl <sub>2</sub> N <sub>2</sub> O <sub>2</sub>  |
| Metamfazon             | Antiinflammatory | 54063-49-9  |      | C <sub>11</sub> H <sub>11</sub> N <sub>5</sub> O                               |
| Metamfepramone         | Anorexic         | 15351-09-4  |      | C <sub>11</sub> H <sub>15</sub> NO                                             |
| Metampicillin          | Antibiotic       | 6489-97-0   |      | C <sub>17</sub> H <sub>19</sub> N <sub>3</sub> O <sub>4</sub> S                |
| Metanixin              | Antiinflammatory | 4394-04-1   |      | C <sub>14</sub> H <sub>14</sub> N <sub>2</sub> O <sub>2</sub>                  |
| Metapramine            | Antidepressant   | 21730-16-5  |      | C <sub>16</sub> H <sub>18</sub> N <sub>2</sub>                                 |
| Metaproterenol         | Bronchodilator   | 586-06-1    |      | C <sub>11</sub> H <sub>17</sub> NO <sub>3</sub>                                |
| Metaterol              | Bronchodilator   | 3571-71-9   |      | C <sub>11</sub> H <sub>17</sub> NO <sub>2</sub>                                |
| Metaxalone             | Muscle Relaxant  | 1665-48-1   | Y    | C <sub>12</sub> H <sub>15</sub> NO <sub>3</sub>                                |
| Metazamide             | Antibacterial    | 14058-90-3  |      | C <sub>11</sub> H <sub>12</sub> N <sub>2</sub> O <sub>2</sub>                  |
| Metazide               | Antibacterial    | 1707-15-9   |      | C <sub>13</sub> H <sub>14</sub> N <sub>6</sub> O <sub>2</sub>                  |
| Metazocine             | Analgesic        | 3734-52-9   |      | C <sub>15</sub> H <sub>21</sub> NO                                             |
| Metbufen               | Antiinflammatory | 63472-04-8  |      | C <sub>17</sub> H <sub>16</sub> O <sub>3</sub>                                 |
| Metcaraphen            | Mydriatic        | 561-79-5    |      | C <sub>20</sub> H <sub>31</sub> NO <sub>2</sub>                                |
| Meteneprost            | Oxytocic         | 61263-35-2  |      | C <sub>23</sub> H <sub>38</sub> O <sub>4</sub>                                 |
| Metergoline            | Pituitary        | 17692-51-2  | Y    | C <sub>25</sub> H <sub>29</sub> N <sub>3</sub> O <sub>2</sub>                  |
| Metergotamine          | Analgesic        | 22336-84-1  |      | C <sub>34</sub> H <sub>37</sub> N <sub>5</sub> O <sub>5</sub>                  |
| Metesculetol           | Unclassified     | 52814-39-8  |      | C <sub>12</sub> H <sub>10</sub> O <sub>6</sub>                                 |
| Metesind Glucuronate   | Antineoplastic   | 138384-68-6 |      | C <sub>23</sub> H <sub>24</sub> N <sub>4</sub> O <sub>3</sub> S                |
| Metethoheptazine       | Analgesic        | 509-84-2    |      | C <sub>17</sub> H <sub>25</sub> NO <sub>2</sub>                                |
| Metformin              | Antidiabetic     | 657-24-9    | Y    | C <sub>4</sub> H <sub>11</sub> N <sub>5</sub>                                  |
| Methacholine           | Cholinergic      | 55-92-5     |      | C <sub>8</sub> H <sub>18</sub> NO <sub>2</sub>                                 |
| Methacycline           | Antibiotic       | 914-00-1    |      | C <sub>22</sub> H <sub>22</sub> N <sub>2</sub> O <sub>8</sub>                  |
| Methadone              | Analgesic        | 76-99-3     | Y    | C <sub>21</sub> H <sub>27</sub> NO                                             |
| Methadyl Acetate       | Analgesic        | 509-74-0    |      | C <sub>23</sub> H <sub>31</sub> NO <sub>2</sub>                                |
| Methafurylene Fumarate | Antihistaminic   | 531-06-6    |      | C <sub>14</sub> H <sub>19</sub> N <sub>3</sub> O                               |
| Methallatal            | Antiemetic       | 115-56-0    |      | C <sub>10</sub> H <sub>14</sub> N <sub>2</sub> O <sub>2</sub> S                |
| Methalleneestril       | Estrogen         | 517-18-0    |      | C <sub>18</sub> H <sub>22</sub> O <sub>3</sub>                                 |
| Methallibure           | Pituitary        | 926-93-2    |      | C <sub>7</sub> H <sub>14</sub> N <sub>4</sub> S <sub>2</sub>                   |
| Methalthiazide         | Diuretic         | 5611-64-3   |      | C <sub>12</sub> H <sub>16</sub> ClN <sub>3</sub> O <sub>4</sub> S <sub>3</sub> |
| Methamphetamine        | Anorexic         | 537-46-2    | Y    | C <sub>10</sub> H <sub>15</sub> N                                              |
| Methandriol            | Steroid          | 521-10-8    |      | C <sub>20</sub> H <sub>32</sub> O <sub>2</sub>                                 |
| Methandrostenolone     | Androgen         | 72-63-9     |      | C <sub>20</sub> H <sub>28</sub> O <sub>2</sub>                                 |
| Methaniazide           | Antibacterial    | 13447-95-5  |      | C <sub>7</sub> H <sub>9</sub> N <sub>3</sub> O <sub>4</sub> S                  |
| Methantheline          | Antispasmodic    | 5818-17-7   |      | C <sub>21</sub> H <sub>26</sub> BrNO <sub>3</sub>                              |
| Methaphenilene         | Antihistaminic   | 493-78-7    |      | C <sub>15</sub> H <sub>20</sub> N <sub>2</sub> S                               |
| Methapyrilene          | Antihistaminic   | 91-80-5     |      | C <sub>14</sub> H <sub>19</sub> N <sub>3</sub> S                               |
| Methaqualone           | Sedative         | 72-44-6     |      | C <sub>16</sub> H <sub>14</sub> N <sub>2</sub> O                               |
| Metharbital            | Anticonvulsant   | 50-11-3     |      | C <sub>9</sub> H <sub>14</sub> N <sub>2</sub> O <sub>3</sub>                   |
| Methastyrindone        | Antipsychotic    | 721-19-7    |      | C <sub>13</sub> H <sub>15</sub> NO <sub>2</sub>                                |
| Methazolamide          | Diuretic         | 554-57-4    |      | C <sub>5</sub> H <sub>8</sub> N <sub>4</sub> O <sub>3</sub> S <sub>2</sub>     |
| Methdilazine           | Dermatologic     | 1982-37-2   |      | C <sub>18</sub> H <sub>20</sub> N <sub>2</sub> S                               |

Table S1. Cont.

| Common Name                         | Indication       | CAS Number  | Oral | Molecular Formula                                                                           |
|-------------------------------------|------------------|-------------|------|---------------------------------------------------------------------------------------------|
| Methenamine                         | Antibacterial    | 100-97-0    |      | C <sub>6</sub> H <sub>12</sub> N <sub>4</sub>                                               |
| Methenolone Acetate                 | Steroid          | 434-05-9    |      | C <sub>22</sub> H <sub>32</sub> O <sub>3</sub>                                              |
| Methenolone Enanthate               | Steroid          | 303-42-4    |      | C <sub>27</sub> H <sub>42</sub> O <sub>3</sub>                                              |
| Metheptazine                        | Analgesic        | 469-78-3    |      | C <sub>16</sub> H <sub>23</sub> NO <sub>2</sub>                                             |
| Methestrol                          | Estrogen         | 130-73-4    |      | C <sub>20</sub> H <sub>26</sub> O <sub>2</sub>                                              |
| Methetoin                           | Anticonvulsant   | 5696-06-0   |      | C <sub>12</sub> H <sub>14</sub> N <sub>2</sub> O <sub>2</sub>                               |
| Methicillin                         | Antibiotic       | 61-32-5     |      | C <sub>17</sub> H <sub>20</sub> N <sub>2</sub> O <sub>6</sub> S                             |
| Methimazole                         | Thyroid          | 60-56-0     | Y    | C <sub>4</sub> H <sub>6</sub> N <sub>2</sub> S                                              |
| Methiodal                           | Anesthetic       | 143-47-5    |      | CH <sub>3</sub> IO <sub>3</sub> S                                                           |
| Methiomeprazine                     | Analgesic        | 7009-43-0   |      | C <sub>19</sub> H <sub>24</sub> N <sub>2</sub> S <sub>2</sub>                               |
| Methionine                          | Hepatoprotectant | 63-68-3     |      | C <sub>5</sub> H <sub>11</sub> NO <sub>2</sub> S                                            |
| Methisazone                         | Antiviral        | 1910-68-5   |      | C <sub>10</sub> H <sub>10</sub> N <sub>4</sub> OS                                           |
| Methitural                          | Sedative         | 467-43-6    |      | C <sub>12</sub> H <sub>20</sub> N <sub>2</sub> O <sub>2</sub> S <sub>2</sub>                |
| Methixene                           | Muscle Relaxant  | 4969-02-2   | Y    | C <sub>20</sub> H <sub>23</sub> NS                                                          |
| Methocarbamol                       | Muscle Relaxant  | 532-03-6    | Y    | C <sub>11</sub> H <sub>15</sub> NO <sub>5</sub>                                             |
| Methohexital                        | Anesthetic       | 151-83-7    |      | C <sub>14</sub> H <sub>18</sub> N <sub>2</sub> O <sub>3</sub>                               |
| Methopholine                        | Analgesic        | 2154-02-1   |      | C <sub>20</sub> H <sub>24</sub> ClNO <sub>2</sub>                                           |
| Methoprene                          | Dermatologic     | 40596-69-8  |      | C <sub>19</sub> H <sub>34</sub> O <sub>3</sub>                                              |
| Methoserpidine                      | Antihypertensive | 865-04-3    |      | C <sub>33</sub> H <sub>40</sub> N <sub>2</sub> O <sub>9</sub>                               |
| Methotrexate                        | Antineoplastic   | 59-05-2     | Y    | C <sub>20</sub> H <sub>22</sub> N <sub>6</sub> O <sub>5</sub>                               |
| Methotrimeprazine                   | Analgesic        | 60-99-1     |      | C <sub>19</sub> H <sub>24</sub> N <sub>2</sub> OS                                           |
| Methoxamine                         | Antihypotensive  | 390-28-3    |      | C <sub>11</sub> H <sub>17</sub> NO <sub>3</sub>                                             |
| Methoxsalen                         | Dermatologic     | 298-81-7    | Y    | C <sub>12</sub> H <sub>8</sub> O <sub>4</sub>                                               |
| Methoxyflurane                      | Anesthetic       | 76-38-0     |      | C <sub>3</sub> H <sub>4</sub> Cl <sub>2</sub> F <sub>2</sub> O                              |
| 2--5-Nitrofurran                    | Antifungal       | 586-84-5    |      | C <sub>6</sub> H <sub>7</sub> NO <sub>4</sub>                                               |
| Methoxyphedrine                     | Bronchodilator   | 530-54-1    |      | C <sub>11</sub> H <sub>15</sub> NO <sub>2</sub>                                             |
| Methoxyphenamine                    | Bronchodilator   | 93-30-1     |      | C <sub>11</sub> H <sub>17</sub> NO                                                          |
| Methoxypromazine Maleate            | Antipsychotic    | 61-01-8     |      | C <sub>18</sub> H <sub>22</sub> N <sub>2</sub> OS                                           |
| Methscopolamine                     | Antispasmodic    | 13265-10-6  | Y    | C <sub>18</sub> H <sub>24</sub> NO <sub>4</sub>                                             |
| Methsuximide                        | Anticonvulsant   | 77-41-8     | Y    | C <sub>12</sub> H <sub>13</sub> NO <sub>2</sub>                                             |
| Methylclothiazide                   | Diuretic         | 135-07-9    | Y    | C <sub>9</sub> H <sub>11</sub> Cl <sub>2</sub> N <sub>3</sub> O <sub>4</sub> S <sub>2</sub> |
| Methyl Aminolevulinate              | Antineoplastic   | 33320-16-0  |      | C <sub>6</sub> H <sub>11</sub> NO <sub>3</sub>                                              |
| Methyl Nicotinate                   | Dermatologic     | 93-60-7     |      | C <sub>7</sub> H <sub>7</sub> NO <sub>2</sub>                                               |
| Methyl Palmoxirate                  | Antidiabetic     | 69207-52-9  |      | C <sub>18</sub> H <sub>34</sub> O <sub>3</sub>                                              |
| Methyl Salicylate                   | Dermatologic     | 119-36-8    |      | C <sub>8</sub> H <sub>8</sub> O <sub>3</sub>                                                |
| Methylatropine Nitrate              | Mydriatic        | 52-88-0     |      | C <sub>18</sub> H <sub>26</sub> N <sub>2</sub> O <sub>6</sub>                               |
| Methylbenactyzium Bromide           | Antidepressant   | 3166-62-9   |      | C <sub>21</sub> H <sub>28</sub> BrNO <sub>3</sub>                                           |
| Methylchromone                      | Antispasmodic    | 85-90-5     |      | C <sub>10</sub> H <sub>8</sub> O <sub>2</sub>                                               |
| Methyldesorphine                    | Analgesic        | 16008-36-9  |      | C <sub>18</sub> H <sub>21</sub> NO <sub>2</sub>                                             |
| Methyldihydromorphine               | Analgesic        | 509-56-8    |      | C <sub>18</sub> H <sub>23</sub> NO <sub>3</sub>                                             |
| Methyldopa                          | Antihypertensive | 555-30-6    |      | C <sub>10</sub> H <sub>13</sub> NO <sub>4</sub>                                             |
| Methylene Blue                      | Hemantic         | 61-73-4     |      | C <sub>16</sub> H <sub>18</sub> ClN <sub>3</sub> S                                          |
| Methylephedrine                     | Nootropic        | 552-79-4    |      | C <sub>11</sub> H <sub>17</sub> NO                                                          |
| Methylergonovine                    | Oxytocic         | 113-42-8    | Y    | C <sub>20</sub> H <sub>25</sub> N <sub>3</sub> O <sub>2</sub>                               |
| Methylhexaneamine                   | Antihypotensive  | 105-41-9    |      | C <sub>7</sub> H <sub>17</sub> N                                                            |
| Methylmethionine Sulfonium Chloride | Unclassified     | 1115-84-0   |      | C <sub>6</sub> H <sub>14</sub> ClNO <sub>2</sub> S                                          |
| Methylphenidate                     | Nootropic        | 113-45-1    | Y    | C <sub>14</sub> H <sub>19</sub> NO <sub>2</sub>                                             |
| Methylprednisolone                  | Glucocorticoid   | 83-43-2     | Y    | C <sub>22</sub> H <sub>30</sub> O <sub>5</sub>                                              |
| Methylprednisolone Aceponate        | Glucocorticoid   | 86401-95-8  |      | C <sub>27</sub> H <sub>36</sub> O <sub>7</sub>                                              |
| Methylprednisolone Acetate          | Glucocorticoid   | 53-36-1     | Y    | C <sub>24</sub> H <sub>32</sub> O <sub>6</sub>                                              |
| Methylprednisolone Hemisuccinate    | Glucocorticoid   | 2921-57-5   |      | C <sub>26</sub> H <sub>34</sub> O <sub>8</sub>                                              |
| Methylprednisolone Sodium Phosphate | Glucocorticoid   | 22252-38-6  |      | C <sub>22</sub> H <sub>31</sub> O <sub>8</sub> P                                            |
| Methylprednisolone Suleptanate      | Antiinflammatory | 121807-10-1 |      | C <sub>33</sub> H <sub>49</sub> NO <sub>10</sub> S                                          |
| Methylpromazine                     | Dermatologic     | 84-96-8     |      | C <sub>18</sub> H <sub>22</sub> N <sub>2</sub> S                                            |
| Methyltestosterone                  | Androgen         | 58-18-4     | Y    | C <sub>20</sub> H <sub>30</sub> O <sub>2</sub>                                              |
| Methylthiouracil                    | Thyroid          | 56-04-2     |      | C <sub>5</sub> H <sub>6</sub> N <sub>2</sub> OS                                             |
| Methynodiol Diacetate               | Progestogen      | 23163-51-1  |      | C <sub>25</sub> H <sub>34</sub> O <sub>4</sub>                                              |
| Methypylon                          | Sedative         | 125-64-4    |      | C <sub>10</sub> H <sub>17</sub> NO <sub>2</sub>                                             |
| Methysergide                        | Antimigraine     | 361-37-5    | Y    | C <sub>21</sub> H <sub>27</sub> N <sub>3</sub> O <sub>2</sub>                               |
| Metiamide                           | Antitumor        | 34839-70-8  |      | C <sub>9</sub> H <sub>16</sub> N <sub>4</sub> S <sub>2</sub>                                |
| Metiapine                           | Antipsychotic    | 5800-19-1   |      | C <sub>19</sub> H <sub>21</sub> N <sub>3</sub> S                                            |

Table S1. Cont.

| Common Name          | Indication         | CAS Number  | Oral | Molecular Formula                                                              |
|----------------------|--------------------|-------------|------|--------------------------------------------------------------------------------|
| Metiazinic Acid      | Antiinflammatory   | 13993-65-2  |      | C <sub>15</sub> H <sub>13</sub> NO <sub>2</sub> S                              |
| Metibride            | Antithrombotic     | 77989-60-7  |      | C <sub>18</sub> H <sub>18</sub> ClN <sub>3</sub> O <sub>2</sub> S <sub>2</sub> |
| Meticrane            | Diuretic           | 1084-65-7   |      | C <sub>10</sub> H <sub>13</sub> NO <sub>4</sub> S <sub>2</sub>                 |
| Metildigoxin         | Cardiotonic        | 30685-43-9  | Y    | C <sub>42</sub> H <sub>66</sub> O <sub>14</sub>                                |
| Metindizate          | Antispasmodic      | 15687-33-9  |      | C <sub>25</sub> H <sub>31</sub> NO <sub>3</sub>                                |
| Metioprim            | Antibacterial      | 68902-57-8  |      | C <sub>14</sub> H <sub>18</sub> N <sub>4</sub> O <sub>2</sub> S                |
| Metioxate            | Antidepressant     | 42110-58-7  |      | C <sub>22</sub> H <sub>27</sub> N <sub>3</sub> O <sub>4</sub> S                |
| Metipirox            | Antibacterial      | 29342-02-7  |      | C <sub>7</sub> H <sub>9</sub> NO <sub>2</sub>                                  |
| Metipranolol         | Antihypertensive   | 22664-55-7  |      | C <sub>17</sub> H <sub>27</sub> NO <sub>4</sub>                                |
| Metiprenaline        | Bronchodilator     | 1212-03-9   |      | C <sub>12</sub> H <sub>19</sub> NO <sub>3</sub>                                |
| Metitepine           | Antipsychotic      | 20229-30-5  |      | C <sub>20</sub> H <sub>24</sub> N <sub>2</sub> S <sub>2</sub>                  |
| Metizoline           | Adrenergic         | 17692-22-7  |      | C <sub>13</sub> H <sub>14</sub> N <sub>2</sub> S                               |
| Metkephamid Acetate  | Analgesic          | 66960-34-7  |      | C <sub>29</sub> H <sub>40</sub> N <sub>6</sub> O <sub>6</sub> S                |
| Metochalcone         | Choleric           | 18493-30-6  |      | C <sub>18</sub> H <sub>18</sub> O <sub>4</sub>                                 |
| Metoclopramide       | Antiemetic         | 364-62-5    | Y    | C <sub>14</sub> H <sub>22</sub> ClN <sub>3</sub> O <sub>2</sub>                |
| Metocurine           | Muscle Relaxant    | 5152-30-7   |      | C <sub>40</sub> H <sub>48</sub> N <sub>2</sub> O <sub>6</sub>                  |
| Metocurine Iodide    | Muscle Relaxant    | 7601-55-0   |      | C <sub>40</sub> H <sub>48</sub> I <sub>2</sub> N <sub>2</sub> O <sub>6</sub>   |
| Metofenazate         | Antipsychotic      | 388-51-2    |      | C <sub>31</sub> H <sub>36</sub> ClN <sub>3</sub> O <sub>5</sub> S              |
| Metogest             | Steroid            | 52279-58-0  |      | C <sub>20</sub> H <sub>30</sub> O <sub>2</sub>                                 |
| Metolazone           | Diuretic           | 17560-51-9  | Y    | C <sub>16</sub> H <sub>16</sub> ClN <sub>3</sub> O <sub>3</sub> S              |
| Metomidate           | Sedative           | 5377-20-8   |      | C <sub>13</sub> H <sub>14</sub> N <sub>2</sub> O <sub>2</sub>                  |
| Metopimazine         | Antiemetic         | 14008-44-7  |      | C <sub>22</sub> H <sub>27</sub> N <sub>3</sub> O <sub>3</sub> S <sub>2</sub>   |
| Metopon              | Analgesic          | 143-52-2    |      | C <sub>18</sub> H <sub>21</sub> NO <sub>3</sub>                                |
| Metoprine            | Antineoplastic     | 7761-45-7   |      | C <sub>11</sub> H <sub>10</sub> Cl <sub>2</sub> N <sub>4</sub>                 |
| Metoprolol           | Antihypertensive   | 51384-51-1  | Y    | C <sub>15</sub> H <sub>25</sub> NO <sub>3</sub>                                |
| Metoquizine          | Mydriatic          | 7125-67-9   |      | C <sub>22</sub> H <sub>27</sub> N <sub>5</sub> O                               |
| Metoserpate          | Sedative           | 1178-28-5   |      | C <sub>24</sub> H <sub>32</sub> N <sub>2</sub> O <sub>5</sub>                  |
| Metostilenol         | Steroid            | 103980-45-6 |      | C <sub>15</sub> H <sub>21</sub> NO <sub>3</sub>                                |
| Metoxepin            | Antipsychotic      | 22013-23-6  |      | C <sub>20</sub> H <sub>22</sub> N <sub>2</sub> O <sub>2</sub>                  |
| Metrafazoline        | Decongestant       | 38349-38-1  |      | C <sub>17</sub> H <sub>22</sub> N <sub>2</sub>                                 |
| Metralindole         | Antidepressant     | 54188-38-4  |      | C <sub>15</sub> H <sub>17</sub> N <sub>3</sub> O                               |
| Metrazifone          | Nootropic          | 68289-14-5  |      | C <sub>20</sub> H <sub>23</sub> N <sub>5</sub> O                               |
| Metrenperone         | Steroid            | 81043-56-3  |      | C <sub>24</sub> H <sub>26</sub> FN <sub>3</sub> O <sub>2</sub>                 |
| Metribolone          | Steroid            | 965-93-5    |      | C <sub>19</sub> H <sub>24</sub> O <sub>2</sub>                                 |
| Metrifonate          | Anthelminthic      | 52-68-6     |      | C <sub>4</sub> H <sub>8</sub> Cl <sub>3</sub> O <sub>4</sub> P                 |
| Metrifudil           | Antiseizure        | 23707-33-7  |      | C <sub>18</sub> H <sub>21</sub> N <sub>5</sub> O <sub>4</sub>                  |
| Metronidazole        | Antiprotozoal      | 443-48-1    | Y    | C <sub>6</sub> H <sub>9</sub> N <sub>3</sub> O <sub>3</sub>                    |
| Meturedepa           | Antineoplastic     | 661-29-6    |      | C <sub>11</sub> H <sub>22</sub> N <sub>3</sub> O <sub>3</sub> P                |
| Metyridine           | Analgesic          | 14-91-0     |      | C <sub>8</sub> H <sub>11</sub> NO                                              |
| Metyrosine           | Antineoplastic     | 672-87-7    | Y    | C <sub>10</sub> H <sub>13</sub> NO <sub>3</sub>                                |
| Mevastatin           | Antihyperlipidemic | 73573-88-3  |      | C <sub>23</sub> H <sub>34</sub> O <sub>5</sub>                                 |
| Mexafylline          | Bronchodilator     | 80294-25-3  |      | C <sub>14</sub> H <sub>18</sub> N <sub>4</sub> O <sub>2</sub>                  |
| Mexazolam            | Anxiolytic         | 31868-18-5  |      | C <sub>18</sub> H <sub>16</sub> Cl <sub>2</sub> N <sub>2</sub> O <sub>2</sub>  |
| Mexenone             | Dermatologic       | 1641-17-4   |      | C <sub>15</sub> H <sub>14</sub> O <sub>3</sub>                                 |
| Mexiletine           | Antiarrhythmic     | 31828-71-4  | Y    | C <sub>11</sub> H <sub>17</sub> NO                                             |
| Mexiprostil          | Antiulcerative     | 88980-20-5  |      | C <sub>23</sub> H <sub>40</sub> O <sub>6</sub>                                 |
| Mexoprofen           | Analgesic          | 37529-08-1  |      | C <sub>16</sub> H <sub>22</sub> O <sub>2</sub>                                 |
| Mexrenoate Potassium | Antihypertensive   | 41020-68-2  |      | C <sub>24</sub> H <sub>34</sub> O <sub>6</sub>                                 |
| Mezacopride          | Antiemetic         | 89613-77-4  |      | C <sub>16</sub> H <sub>22</sub> ClN <sub>3</sub> O <sub>2</sub>                |
| Mezepine             | Analgesic          | 27432-00-4  |      | C <sub>18</sub> H <sub>22</sub> N <sub>2</sub>                                 |
| Mezilamine           | Antidepressant     | 50335-55-2  |      | C <sub>11</sub> H <sub>18</sub> ClN <sub>5</sub> S                             |
| Mezlocillin          | Antibiotic         | 51481-65-3  |      | C <sub>21</sub> H <sub>25</sub> N <sub>5</sub> O <sub>8</sub> S <sub>2</sub>   |
| Mianserin            | Antidepressant     | 24219-97-4  | Y    | C <sub>18</sub> H <sub>20</sub> N <sub>2</sub>                                 |
| Mibefradil           | Antihypertensive   | 116644-53-2 | Y    | C <sub>29</sub> H <sub>38</sub> FN <sub>3</sub> O <sub>3</sub>                 |
| Mibolerone           | Androgen           | 3704-09-4   |      | C <sub>20</sub> H <sub>30</sub> O <sub>2</sub>                                 |
| Micinate             | Vasodilator        | 39537-99-0  |      | C <sub>23</sub> H <sub>27</sub> NO <sub>4</sub>                                |
| Miconazole           | Antifungal         | 22916-47-8  |      | C <sub>18</sub> H <sub>14</sub> Cl <sub>4</sub> N <sub>2</sub> O               |
| Micronomicin         | Antibiotic         | 52093-21-7  |      | C <sub>20</sub> H <sub>41</sub> N <sub>5</sub> O <sub>7</sub>                  |
| Midafalur            | Sedative           | 23757-42-8  |      | C <sub>7</sub> H <sub>3</sub> F <sub>12</sub> N <sub>3</sub>                   |
| Midafotel            | Analgesic          | 117414-74-1 |      | C <sub>8</sub> H <sub>15</sub> N <sub>2</sub> O <sub>5</sub> P                 |
| Midaglizole          | Antihypertensive   | 66529-17-7  |      | C <sub>16</sub> H <sub>17</sub> N <sub>3</sub>                                 |
| Midamaline           | Antihypertensive   | 496-38-8    |      | C <sub>18</sub> H <sub>21</sub> ClN <sub>4</sub>                               |
| Midaxifylline        | Bronchodilator     | 151159-23-8 |      | C <sub>16</sub> H <sub>25</sub> N <sub>5</sub> O <sub>2</sub>                  |



Table S1. Cont.

| Common Name         | Indication                | CAS Number  | Oral | Molecular Formula                                                                            |
|---------------------|---------------------------|-------------|------|----------------------------------------------------------------------------------------------|
| Midazolgel          | Unclassified              | 80614-27-3  |      | C <sub>18</sub> H <sub>24</sub> N <sub>2</sub> O                                             |
| Midazolam           | Anesthetic                | 59467-70-8  |      | C <sub>18</sub> H <sub>15</sub> ClFN <sub>3</sub>                                            |
| Midecamycin         | Antibiotic                | 35457-80-8  |      | C <sub>41</sub> H <sub>67</sub> NO <sub>15</sub>                                             |
| Midesteine          | Antitussive               | 94149-41-4  |      | C <sub>12</sub> H <sub>13</sub> NO <sub>5</sub> S <sub>3</sub>                               |
| Midodrine           | Antihypertensive          | 42794-76-3  | Y    | C <sub>12</sub> H <sub>18</sub> N <sub>2</sub> O <sub>4</sub>                                |
| Midostaurin         | Antineoplastic            | 120685-11-2 | Y    | C <sub>35</sub> H <sub>30</sub> N <sub>4</sub> O <sub>4</sub>                                |
| Mifentidine         | Antihistaminic            | 83184-43-4  |      | C <sub>13</sub> H <sub>16</sub> N <sub>4</sub>                                               |
| Mifepristone        | Abortifacient             | 84371-65-3  |      | C <sub>29</sub> H <sub>35</sub> NO <sub>2</sub>                                              |
| Mifobate            | Antihyperlipidemic        | 76541-72-5  |      | C <sub>11</sub> H <sub>17</sub> ClO <sub>7</sub> P <sub>2</sub>                              |
| Migalastat          | Antihypertensive          | 108147-54-2 | Y    | C <sub>6</sub> H <sub>13</sub> NO <sub>4</sub>                                               |
| Miglitol            | Antidiabetic              | 72432-03-2  | Y    | C <sub>8</sub> H <sub>17</sub> NO <sub>5</sub>                                               |
| Miglustat           | Antihypertensive          | 72599-27-0  | Y    | C <sub>10</sub> H <sub>21</sub> NO <sub>4</sub>                                              |
| Milacainide         | Antiarrhythmic            | 141725-09-9 |      | C <sub>19</sub> H <sub>25</sub> N <sub>3</sub> O                                             |
| Milacemide          | Anticonvulsant            | 76990-56-2  |      | C <sub>7</sub> H <sub>16</sub> N <sub>2</sub> O                                              |
| Milameline          | Nootropic                 | 139886-32-1 |      | C <sub>8</sub> H <sub>14</sub> N <sub>2</sub> O                                              |
| Milataxel           | Antineoplastic            | 393101-41-2 |      | C <sub>44</sub> H <sub>55</sub> NO <sub>16</sub>                                             |
| Milenperone         | Antipsychotic             | 59831-64-0  |      | C <sub>22</sub> H <sub>23</sub> ClFN <sub>3</sub> O <sub>2</sub>                             |
| Milfasartan         | Antihypertensive          | 148564-47-0 |      | C <sub>30</sub> H <sub>30</sub> N <sub>6</sub> O <sub>5</sub> S                              |
| Milipertine         | Antipsychotic             | 24360-55-2  |      | C <sub>24</sub> H <sub>31</sub> N <sub>3</sub> O <sub>3</sub>                                |
| Milnacipran         | Antidepressant            | 92623-85-3  | Y    | C <sub>15</sub> H <sub>22</sub> N <sub>2</sub> O                                             |
| Miloxacin           | Antibiotic                | 37065-29-5  |      | C <sub>12</sub> H <sub>9</sub> NO <sub>6</sub>                                               |
| Milrinone           | Cardiotonic               | 78415-72-2  |      | C <sub>12</sub> H <sub>9</sub> N <sub>3</sub> O                                              |
| Miltefosine         | Antineoplastic            | 58066-85-6  | Y    | C <sub>21</sub> H <sub>46</sub> NO <sub>4</sub> P                                            |
| Milverine           | Antispasmodic             | 75437-14-8  |      | C <sub>20</sub> H <sub>20</sub> N <sub>2</sub>                                               |
| Mimbane             | Analgesic                 | 3277-59-6   |      | C <sub>20</sub> H <sub>26</sub> N <sub>2</sub>                                               |
| Minalrestat         | Antidiabetic              | 129688-50-2 |      | C <sub>19</sub> H <sub>11</sub> BrF <sub>2</sub> N <sub>2</sub> O <sub>4</sub>               |
| Minamestane         | Antineoplastic            | 105051-87-4 |      | C <sub>19</sub> H <sub>23</sub> NO <sub>2</sub>                                              |
| Minaprine           | Antidepressant            | 25905-77-5  |      | C <sub>17</sub> H <sub>22</sub> N <sub>4</sub> O                                             |
| Minaxolone          | Anesthetic                | 62571-87-3  |      | C <sub>25</sub> H <sub>43</sub> NO <sub>3</sub>                                              |
| Mindodilol          | Unclassified              | 70260-53-6  |      | C <sub>23</sub> H <sub>28</sub> N <sub>2</sub> O <sub>3</sub>                                |
| Mindoperone         | Antipsychotic             | 52157-83-2  |      | C <sub>25</sub> H <sub>29</sub> FN <sub>2</sub> O <sub>2</sub>                               |
| Minepentate         | Unclassified              | 13877-99-1  |      | C <sub>18</sub> H <sub>27</sub> NO <sub>3</sub>                                              |
| Minocromil          | Antihistaminic            | 85118-44-1  |      | C <sub>18</sub> H <sub>16</sub> N <sub>2</sub> O <sub>6</sub>                                |
| Minocycline         | Antibiotic                | 10118-90-8  | Y    | C <sub>23</sub> H <sub>27</sub> N <sub>3</sub> O <sub>7</sub>                                |
| Minodronic Acid     | Bone Resorption Inhibitor | 180064-38-4 | Y    | C <sub>9</sub> H <sub>12</sub> N <sub>2</sub> O <sub>7</sub> P <sub>2</sub>                  |
| Minopafant          | Antithrombotic            | 128420-61-1 |      | C <sub>46</sub> H <sub>73</sub> ClN <sub>4</sub> O <sub>9</sub>                              |
| Minoxidil           | Antihypertensive          | 38304-91-5  |      | C <sub>9</sub> H <sub>15</sub> N <sub>5</sub> O                                              |
| Mioflazine          | Vasodilator               | 79467-23-5  |      | C <sub>29</sub> H <sub>30</sub> Cl <sub>2</sub> F <sub>2</sub> N <sub>4</sub> O <sub>2</sub> |
| Mipimazole          | Antibiotic                | 20406-60-4  |      | C <sub>6</sub> H <sub>12</sub> N <sub>2</sub> S                                              |
| Mipitroban          | Anticoagulant             | 136122-46-8 |      | C <sub>19</sub> H <sub>19</sub> Cl <sub>2</sub> N <sub>3</sub> O <sub>2</sub>                |
| Miproxifene         | Antineoplastic            | 129612-87-9 |      | C <sub>29</sub> H <sub>35</sub> NO <sub>2</sub>                                              |
| Mirfentanil         | Analgesic                 | 117523-47-4 |      | C <sub>22</sub> H <sub>24</sub> N <sub>4</sub> O <sub>2</sub>                                |
| Mirincamycin        | Antibacterial             | 31101-25-4  |      | C <sub>19</sub> H <sub>35</sub> ClN <sub>2</sub> O <sub>5</sub> S                            |
| Mirisetron Maleate  | Anxiolytic                | 135905-89-4 |      | C <sub>24</sub> H <sub>31</sub> N <sub>3</sub> O <sub>2</sub>                                |
| Mioprofen           | Analgesic                 | 55843-86-2  |      | C <sub>16</sub> H <sub>14</sub> N <sub>2</sub> O <sub>2</sub>                                |
| Mirosamicin         | Antibacterial             | 3684-69-2   |      | C <sub>37</sub> H <sub>61</sub> NO <sub>13</sub>                                             |
| Mirtazapine         | Antidepressant            | 85650-52-8  | Y    | C <sub>17</sub> H <sub>19</sub> N <sub>3</sub>                                               |
| Misonidazole        | Antiprotozoal             | 13551-87-6  |      | C <sub>7</sub> H <sub>11</sub> N <sub>3</sub> O <sub>4</sub>                                 |
| Misoprostol         | Antilucerative            | 59122-46-2  |      | C <sub>22</sub> H <sub>38</sub> O <sub>5</sub>                                               |
| Mitemincal Fumarate | Gastroprokinetic          | 154738-42-8 |      | C <sub>40</sub> H <sub>69</sub> NO <sub>12</sub>                                             |
| Mitiglinide         | Antidiabetic              | 145375-43-5 | Y    | C <sub>19</sub> H <sub>25</sub> NO <sub>3</sub>                                              |
| Mitindomide         | Antineoplastic            | 10403-51-7  |      | C <sub>14</sub> H <sub>12</sub> N <sub>2</sub> O <sub>4</sub>                                |
| Mitobronitol        | Antineoplastic            | 488-41-5    |      | C <sub>6</sub> H <sub>12</sub> Br <sub>2</sub> O <sub>4</sub>                                |
| Mitocloimine        | Antispasmodic             | 17692-54-5  |      | C <sub>16</sub> H <sub>19</sub> Cl <sub>2</sub> NO                                           |
| Mitoflaxone         | Antineoplastic            | 87626-55-9  |      | C <sub>17</sub> H <sub>12</sub> O <sub>4</sub>                                               |
| Mitoguazone         | Antineoplastic            | 459-86-9    |      | C <sub>5</sub> H <sub>12</sub> N <sub>8</sub>                                                |
| Mitolactol          | Antineoplastic            | 10318-26-0  |      | C <sub>6</sub> H <sub>12</sub> Br <sub>2</sub> O <sub>4</sub>                                |
| Mitomycin           | Antineoplastic            | 50-07-7     |      | C <sub>15</sub> H <sub>18</sub> N <sub>4</sub> O <sub>5</sub>                                |
| Mitonafide          | Antineoplastic            | 54824-17-8  |      | C <sub>16</sub> H <sub>15</sub> N <sub>3</sub> O <sub>4</sub>                                |
| Mitopodozide        | Antineoplastic            | 1508-45-8   |      | C <sub>24</sub> H <sub>30</sub> N <sub>2</sub> O <sub>8</sub>                                |
| Mitoquidone         | Antineoplastic            | 91753-07-0  |      | C <sub>20</sub> H <sub>13</sub> NO <sub>2</sub>                                              |
| Mitotane            | Antineoplastic            | 53-19-0     | Y    | C <sub>14</sub> H <sub>10</sub> Cl <sub>4</sub>                                              |
| Mitotenamine        | Antihypertensive          | 7696-00-6   |      | C <sub>13</sub> H <sub>15</sub> Br <sub>2</sub> ClNS                                         |

Table S1. Cont.

| Common Name           | Indication           | CAS Number  | Oral | Molecular Formula                                                            |
|-----------------------|----------------------|-------------|------|------------------------------------------------------------------------------|
| Mitoxantrone          | Antineoplastic       | 65271-80-9  |      | C <sub>22</sub> H <sub>28</sub> N <sub>4</sub> O <sub>6</sub>                |
| Mitozolomide          | Antineoplastic       | 85622-95-3  |      | C <sub>7</sub> H <sub>7</sub> ClN <sub>6</sub> O <sub>2</sub>                |
| Mitratapide           | Antiobesity          | 179602-65-4 |      | C <sub>36</sub> H <sub>41</sub> ClN <sub>8</sub> O <sub>4</sub> S            |
| Mivazerol             | Antihypotensive      | 125472-02-8 |      | C <sub>11</sub> H <sub>11</sub> N <sub>3</sub> O <sub>2</sub>                |
| Mivobulin Isethionate | Antineoplastic       | 122332-18-7 |      | C <sub>17</sub> H <sub>19</sub> N <sub>5</sub> O <sub>2</sub>                |
| Mivotilate            | Hepatic Protectant   | 130112-42-4 |      | C <sub>12</sub> H <sub>14</sub> N <sub>2</sub> O <sub>3</sub> S <sub>3</sub> |
| Mixidine              | Vasodilator          | 27737-38-8  |      | C <sub>15</sub> H <sub>22</sub> N <sub>2</sub> O <sub>2</sub>                |
| Mizolastine           | Antihistaminic       | 108612-45-9 | Y    | C <sub>24</sub> H <sub>25</sub> FN <sub>6</sub> O                            |
| Mizoribine            | Immunosuppressant    | 50924-49-7  | Y    | C <sub>9</sub> H <sub>13</sub> N <sub>3</sub> O <sub>6</sub>                 |
| Mobenzoxamine         | Antiemetic           | 65329-79-5  |      | C <sub>30</sub> H <sub>35</sub> FN <sub>2</sub> O <sub>3</sub>               |
| Mocimycin             | Antibiotic           | 50935-71-2  |      | C <sub>43</sub> H <sub>60</sub> N <sub>2</sub> O <sub>12</sub>               |
| Mociprazine           | Antiemetic           | 56693-13-1  |      | C <sub>22</sub> H <sub>32</sub> N <sub>2</sub> O <sub>3</sub>                |
| Moclobemide           | Antidepressant       | 71320-77-9  | Y    | C <sub>13</sub> H <sub>17</sub> ClN <sub>2</sub> O <sub>2</sub>              |
| Moctamide             | Antithrombotic       | 29619-86-1  |      | C <sub>33</sub> H <sub>47</sub> NO                                           |
| Modafinil             | Nootropic            | 68693-11-8  | Y    | C <sub>15</sub> H <sub>15</sub> N <sub>2</sub> O <sub>2</sub> S              |
| Modaline Sulfate      | Antidepressant       | 2856-74-8   |      | C <sub>10</sub> H <sub>15</sub> N <sub>3</sub>                               |
| Modecainide           | Antiarrhythmic       | 81329-71-7  |      | C <sub>22</sub> H <sub>28</sub> N <sub>2</sub> O <sub>3</sub>                |
| Modipafant            | Antithrombotic       | 122957-06-6 |      | C <sub>34</sub> H <sub>29</sub> ClN <sub>6</sub> O <sub>3</sub>              |
| Moexipril             | Antihypertensive     | 103775-10-6 | Y    | C <sub>27</sub> H <sub>34</sub> N <sub>2</sub> O <sub>7</sub>                |
| Moexiprilat           | Antihypertensive     | 103775-14-0 |      | C <sub>25</sub> H <sub>30</sub> N <sub>2</sub> O <sub>7</sub>                |
| Mofarotene            | Antineoplastic       | 125533-88-2 |      | C <sub>29</sub> H <sub>39</sub> NO <sub>2</sub>                              |
| Mofebutazone          | Antiinflammatory     | 2210-63-1   |      | C <sub>13</sub> H <sub>16</sub> N <sub>2</sub> O <sub>2</sub>                |
| Mofegiline            | Antiparkinsonian     | 119386-96-8 |      | C <sub>11</sub> H <sub>13</sub> F <sub>2</sub> N                             |
| Mofezolac             | Antiinflammatory     | 78967-07-4  | Y    | C <sub>19</sub> H <sub>17</sub> NO <sub>5</sub>                              |
| Mofloverine           | Antispasmodic        | 54063-50-2  |      | C <sub>16</sub> H <sub>23</sub> NO <sub>6</sub>                              |
| Mofoxime              | Analgesic            | 29936-79-6  |      | C <sub>14</sub> H <sub>18</sub> N <sub>2</sub> O <sub>4</sub>                |
| Moguisteine           | Antitussive          | 19637-67-1  |      | C <sub>16</sub> H <sub>21</sub> NO <sub>5</sub> S                            |
| Molfarnate            | Antiulcerative       | 83689-23-0  |      | C <sub>31</sub> H <sub>50</sub> O <sub>2</sub>                               |
| Molinazone            | Analgesic            | 5581-46-4   |      | C <sub>11</sub> H <sub>12</sub> N <sub>4</sub> O <sub>2</sub>                |
| Molindone             | Antipsychotic        | 7416-34-4   | Y    | C <sub>16</sub> H <sub>24</sub> N <sub>2</sub> O <sub>2</sub>                |
| Molracetam            | Nootropic            | 94746-78-8  |      | C <sub>18</sub> H <sub>25</sub> N <sub>3</sub> O <sub>4</sub>                |
| Molsidomine           | Antianginal          | 25717-80-0  | Y    | C <sub>9</sub> H <sub>14</sub> N <sub>4</sub> O <sub>4</sub>                 |
| Mometasone Furoate    | Steroid              | 83919-23-7  |      | C <sub>27</sub> H <sub>30</sub> Cl <sub>2</sub> O <sub>6</sub>               |
| Monalazone Disodium   | Antiinflammatory     | 106145-03-3 |      | C <sub>7</sub> H <sub>6</sub> ClNO <sub>4</sub> S                            |
| Monatepil Maleate     | Antianginal          | 103377-41-9 |      | C <sub>28</sub> H <sub>30</sub> FN <sub>3</sub> OS                           |
| Monensin              | Antibiotic           | 17090-79-8  |      | C <sub>36</sub> H <sub>62</sub> O <sub>11</sub>                              |
| Monobenzone           | Dermatologic         | 103-16-2    |      | C <sub>13</sub> H <sub>12</sub> O <sub>2</sub>                               |
| Monooctanoin          | Anticholelithogenic  | 502-54-5    |      | C <sub>11</sub> H <sub>22</sub> O <sub>4</sub>                               |
| Monometacrine         | Antidepressant       | 4757-49-7   |      | C <sub>19</sub> H <sub>24</sub> N <sub>2</sub>                               |
| Monoxerutin           | Capillary Protectant | 23869-24-1  |      | C <sub>29</sub> H <sub>34</sub> O <sub>17</sub>                              |
| Montelukast           | Bronchodilator       | 158966-92-8 | Y    | C <sub>35</sub> H <sub>36</sub> ClNO <sub>3</sub> S                          |
| Montirelin            | Thyroid              | 90243-66-6  |      | C <sub>17</sub> H <sub>24</sub> N <sub>6</sub> O <sub>4</sub> S              |
| Moperone              | Antipsychotic        | 1050-79-9   |      | C <sub>22</sub> H <sub>26</sub> FNO <sub>2</sub>                             |
| Mopidamol             | Antineoplastic       | 13665-88-8  |      | C <sub>19</sub> H <sub>31</sub> N <sub>7</sub> O <sub>4</sub>                |
| Mopidralazine         | Antihypertensive     | 75841-82-6  |      | C <sub>14</sub> H <sub>19</sub> N <sub>5</sub> O                             |
| Moprolol              | Antihypertensive     | 5741-22-0   |      | C <sub>13</sub> H <sub>21</sub> NO <sub>3</sub>                              |
| Moquizone             | Choleretic           | 19395-58-5  |      | C <sub>20</sub> H <sub>21</sub> N <sub>3</sub> O <sub>3</sub>                |
| Morantel Tartrate     | Anthelminthic        | 20574-50-9  |      | C <sub>12</sub> H <sub>16</sub> N <sub>2</sub> S                             |
| Morazone              | Analgesic            | 6536-18-1   |      | C <sub>23</sub> H <sub>27</sub> N <sub>3</sub> O <sub>2</sub>                |
| Morclofone            | Antitussive          | 31848-01-8  |      | C <sub>21</sub> H <sub>24</sub> ClNO <sub>5</sub>                            |
| Morforex              | Anorexic             | 41152-17-4  |      | C <sub>15</sub> H <sub>24</sub> N <sub>2</sub> O                             |
| Moricizine            | Antiarrhythmic       | 31883-05-3  | Y    | C <sub>22</sub> H <sub>25</sub> N <sub>3</sub> O <sub>4</sub> S              |
| Morinamide            | Antibacterial        | 952-54-5    |      | C <sub>10</sub> H <sub>14</sub> N <sub>4</sub> O <sub>2</sub>                |
| Morniflumate          | Antiinflammatory     | 65847-85-0  |      | C <sub>19</sub> H <sub>20</sub> F <sub>3</sub> N <sub>3</sub> O <sub>3</sub> |
| Morocromen            | Antithrombotic       | 35843-07-3  |      | C <sub>21</sub> H <sub>27</sub> N <sub>3</sub> O <sub>5</sub>                |
| Moroxydine            | Antiviral            | 3731-59-7   |      | C <sub>6</sub> H <sub>13</sub> N <sub>5</sub> O                              |
| Morpheridine          | Analgesic            | 469-81-8    |      | C <sub>20</sub> H <sub>30</sub> N <sub>2</sub> O <sub>3</sub>                |
| Morphine Glucuronide  | Nootropic            | 20290-10-2  |      | C <sub>23</sub> H <sub>27</sub> NO <sub>9</sub>                              |
| Morphine              | Analgesic            | 57-27-2     | Y    | C <sub>17</sub> H <sub>19</sub> NO <sub>3</sub>                              |
| Morsuximide           | Anticonvulsant       | 3780-72-1   |      | C <sub>16</sub> H <sub>20</sub> N <sub>2</sub> O <sub>3</sub>                |
| Mosapramine           | Antipsychotic        | 89419-40-9  |      | C <sub>28</sub> H <sub>35</sub> ClN <sub>4</sub> O                           |
| Mosapride             | Gastroprokinetic     | 112885-41-3 | Y    | C <sub>21</sub> H <sub>25</sub> ClFN <sub>3</sub> O <sub>3</sub>             |
| Motapizone            | Bronchodilator       | 90697-57-7  |      | C <sub>12</sub> H <sub>12</sub> N <sub>4</sub> OS                            |

Table S1. Cont.

| Common Name              | Indication             | CAS Number  | Oral | Molecular Formula                                                             |
|--------------------------|------------------------|-------------|------|-------------------------------------------------------------------------------|
| Motexafin                | Antineoplastic         | 189752-49-6 |      | C <sub>48</sub> H <sub>67</sub> N <sub>5</sub> O <sub>10</sub>                |
| Motrazepam               | Anxiolytic             | 29442-58-8  |      | C <sub>17</sub> H <sub>15</sub> N <sub>3</sub> O <sub>4</sub>                 |
| Motretinide              | Dermatologic           | 56281-36-8  |      | C <sub>23</sub> H <sub>31</sub> NO <sub>2</sub>                               |
| Moveltipril              | Antihypertensive       | 85856-54-8  |      | C <sub>19</sub> H <sub>30</sub> N <sub>2</sub> O <sub>5</sub> S               |
| Moxadolen                | Unclassified           | 75992-53-9  |      | C <sub>11</sub> H <sub>13</sub> NO <sub>4</sub>                               |
| Moxalactam               | Antibiotic             | 64952-97-2  |      | C <sub>20</sub> H <sub>20</sub> N <sub>6</sub> O <sub>5</sub> S               |
| Moxaprine                | Antiarrhythmic         | 53076-26-9  |      | C <sub>23</sub> H <sub>32</sub> N <sub>2</sub> O                              |
| Moxastine                | Antihistaminic         | 3572-74-5   |      | C <sub>18</sub> H <sub>23</sub> NO                                            |
| Moxaverine               | Antispasmodic          | 10539-19-2  |      | C <sub>20</sub> H <sub>21</sub> NO <sub>2</sub>                               |
| Moxazocine               | Analgesic              | 58239-89-7  |      | C <sub>18</sub> H <sub>25</sub> NO <sub>2</sub>                               |
| Moxestrol                | Estrogen               | 34816-55-2  |      | C <sub>21</sub> H <sub>26</sub> O <sub>3</sub>                                |
| Moxicoumone              | Unclassified           | 17692-56-7  |      | C <sub>22</sub> H <sub>30</sub> N <sub>2</sub> O <sub>6</sub>                 |
| Moxidectin               | Antiprotozoal          | 113507-06-5 |      | C <sub>37</sub> H <sub>53</sub> NO <sub>8</sub>                               |
| Moxifloxacin             | Antibiotic             | 151096-09-2 | Y    | C <sub>21</sub> H <sub>24</sub> FN <sub>3</sub> O <sub>4</sub>                |
| Moxilubant Maleate       | Antirheumatic          | 146978-48-5 |      | C <sub>26</sub> H <sub>37</sub> N <sub>3</sub> O <sub>4</sub>                 |
| Moxipraquine             | Antiprotozoal          | 23790-08-1  |      | C <sub>24</sub> H <sub>38</sub> N <sub>4</sub> O <sub>2</sub>                 |
| Moxiraprine              | Muscle Relaxant        | 82239-52-9  |      | C <sub>17</sub> H <sub>22</sub> N <sub>4</sub> O <sub>2</sub>                 |
| Moxisylyte               | Vasodilator            | 54-32-0     | Y    | C <sub>16</sub> H <sub>25</sub> NO <sub>3</sub>                               |
| Moxnidazole              | Antiprotozoal          | 52279-59-1  |      | C <sub>13</sub> H <sub>18</sub> N <sub>6</sub> O <sub>5</sub>                 |
| Moxonidine               | Antihypertensive       | 75438-57-2  |      | C <sub>9</sub> H <sub>12</sub> ClN <sub>5</sub> O                             |
| Mozavaptan               | Plasma Volume Expander | 137975-06-5 | Y    | C <sub>27</sub> H <sub>29</sub> N <sub>3</sub> O <sub>2</sub>                 |
| Mozenavir                | Antiviral              | 174391-92-5 |      | C <sub>33</sub> H <sub>36</sub> N <sub>4</sub> O <sub>3</sub>                 |
| Mubritinib               | Antineoplastic         | 366017-09-6 |      | C <sub>25</sub> H <sub>23</sub> F <sub>3</sub> N <sub>4</sub> O <sub>2</sub>  |
| Mupirocin                | Antibacterial          | 12650-69-0  |      | C <sub>26</sub> H <sub>44</sub> O <sub>9</sub>                                |
| Murabutide               | Immunomodulator        | 74817-61-1  |      | C <sub>23</sub> H <sub>40</sub> N <sub>4</sub> O <sub>11</sub>                |
| Muraglitazar             | Antidiabetic           | 331741-94-7 |      | C <sub>29</sub> H <sub>28</sub> N <sub>2</sub> O <sub>7</sub>                 |
| Murocainide              | Antiarrhythmic         | 66203-94-9  |      | C <sub>19</sub> H <sub>27</sub> N <sub>3</sub> O <sub>5</sub>                 |
| Muzolimine               | Diuretic               | 55294-15-0  |      | C <sub>11</sub> H <sub>11</sub> Cl <sub>2</sub> N <sub>5</sub> O              |
| Mycophenolate Mofetil    | Immunomodulator        | 128794-94-5 | Y    | C <sub>23</sub> H <sub>31</sub> NO <sub>7</sub>                               |
| Mycophenolic Acid        | Immunosuppressant      | 24280-93-1  |      | C <sub>17</sub> H <sub>20</sub> O <sub>6</sub>                                |
| Myfadol                  | Analgesic              | 4575-34-2   |      | C <sub>21</sub> H <sub>25</sub> NO <sub>2</sub>                               |
| Myralact                 | Unclassified           | 25737-87-5  |      | C <sub>16</sub> H <sub>35</sub> NO                                            |
| Myrophine                | Analgesic              | 467-18-5    |      | C <sub>38</sub> H <sub>51</sub> NO <sub>4</sub>                               |
| Myrtecaine               | Anesthetic             | 7712-50-7   |      | C <sub>17</sub> H <sub>31</sub> NO                                            |
| N Pyridinium Chloride    | Unclassified           | 6272-74-8   |      | C <sub>21</sub> H <sub>35</sub> ClN <sub>2</sub> O <sub>3</sub>               |
| N,1-Dimethylhexylamine   | Decongestant           | 540-43-2    |      | C <sub>8</sub> H <sub>19</sub> N                                              |
| N,N Dimethyl P Toluidine | Unclassified           | 99-97-8     |      | C <sub>9</sub> H <sub>13</sub> N                                              |
| Nabazenil                | Anticonvulsant         | 58019-65-1  |      | C <sub>35</sub> H <sub>55</sub> NO <sub>3</sub>                               |
| Nabilone                 | Antiemetic             | 51022-71-0  | Y    | C <sub>24</sub> H <sub>36</sub> O <sub>3</sub>                                |
| Nabitan                  | Analgesic              | 66556-74-9  |      | C <sub>35</sub> H <sub>52</sub> N <sub>2</sub> O <sub>3</sub>                 |
| Naboctate                | Antiglaucoma           | 74912-19-9  |      | C <sub>33</sub> H <sub>53</sub> NO <sub>3</sub>                               |
| Nabumetone               | Antiinflammatory       | 42924-53-8  | Y    | C <sub>15</sub> H <sub>16</sub> O <sub>2</sub>                                |
| Nacartocin               | Oxytocic               | 77727-10-7  |      | C <sub>46</sub> H <sub>71</sub> N <sub>11</sub> O <sub>11</sub> S             |
| Nadide                   | Antidote               | 53-84-9     |      | C <sub>21</sub> H <sub>27</sub> N <sub>7</sub> O <sub>14</sub> P <sub>2</sub> |
| Nadifloxacin             | Antibiotic             | 124858-35-1 |      | C <sub>19</sub> H <sub>21</sub> FN <sub>2</sub> O <sub>4</sub>                |
| Nadolol                  | Antihypertensive       | 42200-33-9  | Y    | C <sub>17</sub> H <sub>27</sub> NO <sub>4</sub>                               |
| Nadoxolol                | Antiarrhythmic         | 54063-51-3  |      | C <sub>14</sub> H <sub>16</sub> N <sub>2</sub> O <sub>3</sub>                 |
| Naepaine                 | Anesthetic             | 2188-67-2   |      | C <sub>14</sub> H <sub>22</sub> N <sub>2</sub> O <sub>2</sub>                 |
| Nafagrel                 | Antiinflammatory       | 97901-21-8  |      | C <sub>15</sub> H <sub>16</sub> N <sub>2</sub> O <sub>2</sub>                 |
| Nafamostat Mesylate      | Anticoagulant          | 81525-10-2  |      | C <sub>19</sub> H <sub>17</sub> N <sub>5</sub> O <sub>2</sub>                 |
| Nafazatom                | Antithrombotic         | 59040-30-1  |      | C <sub>16</sub> H <sub>16</sub> N <sub>2</sub> O <sub>2</sub>                 |
| Nafcaproic Acid          | Hemostatic             | 1085-91-2   |      | C <sub>16</sub> H <sub>18</sub> O <sub>2</sub>                                |
| Nafcillin                | Antibiotic             | 147-52-4    |      | C <sub>21</sub> H <sub>22</sub> N <sub>2</sub> O <sub>5</sub> S               |
| Nafenodone               | Antidepressant         | 92615-20-8  |      | C <sub>20</sub> H <sub>23</sub> NO                                            |
| Nafenopin                | Antihyperlipidemic     | 3771-19-5   |      | C <sub>20</sub> H <sub>22</sub> O <sub>3</sub>                                |
| Nafetolol                | Antihypertensive       | 42050-23-7  |      | C <sub>19</sub> H <sub>29</sub> NO <sub>3</sub>                               |
| Nafimidone               | Anticonvulsant         | 64212-22-2  |      | C <sub>15</sub> H <sub>12</sub> N <sub>2</sub> O                              |
| Nafiverine               | Antispasmodic          | 5061-22-3   |      | C <sub>34</sub> H <sub>38</sub> N <sub>2</sub> O <sub>4</sub>                 |
| Naflocort                | Steroid                | 59497-39-1  |      | C <sub>29</sub> H <sub>33</sub> FO <sub>4</sub>                               |
| Nafomine Malate          | Muscle Relaxant        | 46263-35-8  |      | C <sub>12</sub> H <sub>13</sub> NO                                            |
| Nafoxadol                | Analgesic              | 84145-90-4  |      | C <sub>15</sub> H <sub>15</sub> NO <sub>2</sub>                               |
| Nafoxidine               | Steroid                | 1845-11-0   |      | C <sub>29</sub> H <sub>31</sub> NO <sub>2</sub>                               |
| Nafrotyl                 | Vasodilator            | 31329-57-4  | Y    | C <sub>24</sub> H <sub>33</sub> NO <sub>3</sub>                               |

Table S1. Cont.

| Common Name               | Indication           | CAS Number  | Oral | Molecular Formula                                                |
|---------------------------|----------------------|-------------|------|------------------------------------------------------------------|
| Naftalofos                | Anthelminthic        | 1491-41-4   |      | C <sub>16</sub> H <sub>16</sub> NO <sub>6</sub> P                |
| Naftazone                 | Capillary Protectant | 15687-37-3  | Y    | C <sub>11</sub> H <sub>9</sub> N <sub>3</sub> O <sub>2</sub>     |
| Naftifine                 | Antifungal           | 65472-88-0  |      | C <sub>21</sub> H <sub>21</sub> N                                |
| Naftopidil                | Antihypertensive     | 57149-07-2  | Y    | C <sub>24</sub> H <sub>28</sub> N <sub>2</sub> O <sub>3</sub>    |
| Naftoxate                 | Unclassified         | 28820-28-2  |      | C <sub>19</sub> H <sub>14</sub> N <sub>2</sub> OS <sub>2</sub>   |
| Naftypramide              | Antiemetic           | 1505-95-9   |      | C <sub>19</sub> H <sub>26</sub> N <sub>2</sub> O                 |
| Naglvian                  | Antidiabetic         | 122575-28-4 |      | C <sub>22</sub> H <sub>46</sub> N <sub>4</sub> O <sub>3S2V</sub> |
| Nalbuphine                | Analgesic            | 20594-83-6  | Y    | C <sub>21</sub> H <sub>27</sub> NO <sub>4</sub>                  |
| Nalfurafine               | Dermatologic         | 152657-84-6 |      | C <sub>28</sub> H <sub>32</sub> N <sub>2</sub> O <sub>5</sub>    |
| Nalidixic Acid            | Antibiotic           | 389-08-2    |      | C <sub>12</sub> H <sub>12</sub> N <sub>2</sub> O <sub>3</sub>    |
| Nalmefene                 | Antidote             | 55096-26-9  |      | C <sub>21</sub> H <sub>25</sub> NO <sub>3</sub>                  |
| Nalmexone                 | Analgesic            | 16676-26-9  | Y    | C <sub>21</sub> H <sub>25</sub> NO <sub>4</sub>                  |
| Nalorphine                | Antidote             | 62-67-9     |      | C <sub>19</sub> H <sub>21</sub> NO <sub>3</sub>                  |
| Naloxone                  | Antidote             | 465-65-6    | Y    | C <sub>19</sub> H <sub>21</sub> NO <sub>4</sub>                  |
| Naltrexone                | Antidote             | 16590-41-3  |      | C <sub>20</sub> H <sub>23</sub> NO <sub>4</sub>                  |
| Naminidil                 | Vasodilator          | 220641-11-2 | Y    | C <sub>15</sub> H <sub>19</sub> N <sub>5</sub>                   |
| Naminterol                | Bronchodilator       | 93047-40-6  |      | C <sub>19</sub> H <sub>26</sub> N <sub>2</sub> O <sub>3</sub>    |
| Namirotene                | Immunomodulator      | 101506-83-6 |      | C <sub>17</sub> H <sub>18</sub> O <sub>2</sub> S                 |
| Nanafrocic                | Antibiotic           | 52934-83-5  |      | C <sub>16</sub> H <sub>14</sub> O <sub>6</sub>                   |
| Nandrolone Cyclotate      | Steroid              | 22263-51-0  |      | C <sub>28</sub> H <sub>38</sub> O <sub>3</sub>                   |
| Nandrolone Decanoate      | Steroid              | 360-70-3    |      | C <sub>28</sub> H <sub>44</sub> O <sub>3</sub>                   |
| Nandrolone Phenpropionate | Androgen             | 62-90-8     |      | C <sub>27</sub> H <sub>34</sub> O <sub>3</sub>                   |
| Nanofin                   | Antirheumatic        | 504-03-0    |      | C <sub>7</sub> H <sub>15</sub> N                                 |
| Nanterinone               | Vasodilator          | 102791-47-9 |      | C <sub>15</sub> H <sub>15</sub> N <sub>3</sub> O                 |
| Nantradol                 | Analgesic            | 72028-54-7  |      | C <sub>27</sub> H <sub>35</sub> NO <sub>4</sub>                  |
| Napactadine               | Antidepressant       | 76631-45-3  |      | C <sub>14</sub> H <sub>16</sub> N <sub>2</sub>                   |
| Napamezole                | Antidepressant       | 91524-14-0  |      | C <sub>14</sub> H <sub>16</sub> N <sub>2</sub>                   |
| Naphazoline               | Decongestant         | 835-31-4    |      | C <sub>14</sub> H <sub>14</sub> N <sub>2</sub>                   |
| Naphthalene               | Anthelminthic        | 91-20-3     |      | C <sub>10</sub> H <sub>8</sub>                                   |
| Naphthocaine              | Analgesic            | 5656-83-7   |      | C <sub>17</sub> H <sub>22</sub> N <sub>2</sub> O <sub>2</sub>    |
| Naphthonone               | Unclassified         | 7114-11-6   |      | C <sub>16</sub> H <sub>16</sub> O <sub>2</sub>                   |
| Napirimus                 | Immunosuppressant    | 70696-66-1  |      | C <sub>17</sub> H <sub>13</sub> NO <sub>3</sub>                  |
| Napitane Mesylate         | Antidepressant       | 148152-63-0 |      | C <sub>22</sub> H <sub>25</sub> NO <sub>2</sub>                  |
| Naproxime                 | Analgesic            | 57925-64-1  |      | C <sub>13</sub> H <sub>14</sub> N <sub>2</sub> O <sub>2</sub>    |
| Naproxen                  | Antiinflammatory     | 22204-53-1  | Y    | C <sub>14</sub> H <sub>14</sub> O <sub>3</sub>                   |
| Naproxol                  | Antiinflammatory     | 26159-36-4  |      | C <sub>14</sub> H <sub>16</sub> O <sub>2</sub>                   |
| Napsagatran               | Antithrombotic       | 154397-77-0 |      | C <sub>26</sub> H <sub>34</sub> N <sub>6</sub> O <sub>6</sub> S  |
| Naranol                   | Antipsychotic        | 22292-91-7  |      | C <sub>18</sub> H <sub>21</sub> NO <sub>2</sub>                  |
| Narasin                   | Antibacterial        | 55134-13-9  |      | C <sub>43</sub> H <sub>72</sub> O <sub>11</sub>                  |
| Naratriptan               | Antimigraine         | 121679-13-8 | Y    | C <sub>17</sub> H <sub>25</sub> N <sub>3</sub> O <sub>2</sub> S  |
| Narceine                  | Analgesic            | 131-28-2    |      | C <sub>23</sub> H <sub>27</sub> NO <sub>8</sub>                  |
| Nardeterol                | Bronchodilator       | 73865-18-6  |      | C <sub>20</sub> H <sub>24</sub> FN <sub>3</sub> O <sub>2</sub>   |
| Naringin                  | Antiinflammatory     | 10236-47-2  |      | C <sub>27</sub> H <sub>32</sub> O <sub>14</sub>                  |
| Naroparicil               | Antithrombotic       | 120819-70-7 |      | C <sub>19</sub> H <sub>17</sub> NO <sub>4</sub> S <sub>2</sub>   |
| Natamycin                 | Antifungal           | 7681-93-8   |      | C <sub>33</sub> H <sub>47</sub> NO <sub>13</sub>                 |
| Nateglinide               | Antidiabetic         | 105816-04-4 | Y    | C <sub>19</sub> H <sub>27</sub> NO <sub>3</sub>                  |
| Naveglitazar              | Antidiabetic         | 476436-68-7 |      | C <sub>25</sub> H <sub>26</sub> O <sub>6</sub>                   |
| Navuridine                | Antiviral            | 84472-85-5  |      | C <sub>9</sub> H <sub>11</sub> N <sub>5</sub> O <sub>4</sub>     |
| Naxagolide                | Antiparkinsonian     | 88058-88-2  |      | C <sub>15</sub> H <sub>21</sub> NO <sub>2</sub>                  |
| Naxaprostene              | Prostaglandin        | 87269-59-8  |      | C <sub>25</sub> H <sub>32</sub> O <sub>4</sub>                   |
| Naxifylline               | Cardiotonic          | 166374-49-8 |      | C <sub>18</sub> H <sub>24</sub> N <sub>4</sub> O <sub>3</sub>    |
| Nealbarbital              | Sedative             | 561-83-1    |      | C <sub>12</sub> H <sub>18</sub> N <sub>2</sub> O <sub>3</sub>    |
| Nebentan                  | Unclassified         | 403604-85-3 |      | C <sub>24</sub> H <sub>21</sub> N <sub>5</sub> O <sub>5</sub> S  |
| Nebicapone                | Antiparkinsonian     | 274925-86-9 |      | C <sub>14</sub> H <sub>11</sub> NO <sub>5</sub>                  |
| Nebidrazine               | Anorexic             | 55248-23-2  |      | C <sub>9</sub> H <sub>8</sub> Cl <sub>2</sub> N <sub>6</sub>     |
| Nebivolol                 | Antihypertensive     | 118457-14-0 | Y    | C <sub>22</sub> H <sub>25</sub> F <sub>2</sub> NO <sub>4</sub>   |
| Neboglamine               | Antifungal           | 163000-63-3 |      | C <sub>13</sub> H <sub>24</sub> N <sub>2</sub> O <sub>3</sub>    |
| Nebracetam                | Nootropic            | 97205-34-0  |      | C <sub>12</sub> H <sub>16</sub> N <sub>2</sub> O                 |
| Necopidem                 | Sedative             | 103844-77-5 |      | C <sub>23</sub> H <sub>29</sub> N <sub>3</sub> O                 |
| Nedocromil                | Antihistaminic       | 69049-73-6  |      | C <sub>19</sub> H <sub>17</sub> NO <sub>7</sub>                  |
| Nefazodone                | Antidepressant       | 83366-66-9  |      | C <sub>25</sub> H <sub>32</sub> ClN <sub>5</sub> O <sub>2</sub>  |
| Nefiracetam               | Nootropic            | 77191-36-7  |      | C <sub>14</sub> H <sub>18</sub> N <sub>2</sub> O <sub>2</sub>    |
| Neflumozide               | Antipsychotic        | 86636-93-3  |      | C <sub>22</sub> H <sub>23</sub> FN <sub>4</sub> O <sub>2</sub>   |

Table S1. Cont.

| Common Name             | Indication                | CAS Number  | Oral | Molecular Formula                                                               |
|-------------------------|---------------------------|-------------|------|---------------------------------------------------------------------------------|
| Nefopam                 | Analgesic                 | 13669-70-0  |      | C <sub>17</sub> H <sub>19</sub> NO                                              |
| Nelarabine              | Antineoplastic            | 121032-29-9 |      | C <sub>11</sub> H <sub>15</sub> N <sub>5</sub> O <sub>5</sub>                   |
| Neldazosin              | Antihypertensive          | 109713-79-3 |      | C <sub>18</sub> H <sub>25</sub> N <sub>5</sub> O <sub>4</sub>                   |
| Nelezaprine Maleate     | Muscle Relaxant           | 69624-60-8  |      | C <sub>18</sub> H <sub>21</sub> ClN <sub>2</sub>                                |
| Nelfinavir              | Antiviral                 | 159989-64-7 | Y    | C <sub>32</sub> H <sub>45</sub> N <sub>3</sub> O <sub>4</sub> S                 |
| Neltenexine             | Respiratory Stimulant     | 99453-84-6  |      | C <sub>18</sub> H <sub>20</sub> Br <sub>2</sub> N <sub>2</sub> O <sub>2</sub> S |
| Nemadectin              | Antiprotozoal             | 102130-84-7 |      | C <sub>36</sub> H <sub>52</sub> O <sub>8</sub>                                  |
| Nemazoline              | Decongestant              | 130759-56-7 |      | C <sub>10</sub> H <sub>11</sub> Cl <sub>2</sub> N <sub>3</sub>                  |
| Nemifitide Ditriflutate | Antidepressant            | 173240-15-8 |      | C <sub>33</sub> H <sub>43</sub> FN <sub>10</sub> O <sub>6</sub>                 |
| Nemonapride             | Antiemetic                | 75272-39-8  | Y    | C <sub>21</sub> H <sub>26</sub> ClN <sub>3</sub> O <sub>2</sub>                 |
| Nemorubicin             | Antineoplastic            | 108852-90-0 |      | C <sub>32</sub> H <sub>37</sub> NO <sub>13</sub>                                |
| Neosarsphenamine        | Antibiotic                | 637-30-9    |      | C <sub>13</sub> H <sub>14</sub> As <sub>2</sub> N <sub>2</sub> O <sub>4</sub> S |
| Neocinchophen           | Analgesic                 | 485-34-7    |      | C <sub>19</sub> H <sub>17</sub> NO <sub>2</sub>                                 |
| Neostigmine Bromide     | Cholinergic               | 114-80-7    |      | C <sub>12</sub> H <sub>19</sub> BrN <sub>2</sub> O <sub>2</sub>                 |
| Nepadutant              | Bronchodilator            | 183747-35-5 | Y    | C <sub>45</sub> H <sub>58</sub> N <sub>10</sub> O <sub>13</sub>                 |
| Nepafenac               | Antiinflammatory          | 78281-72-8  |      | C <sub>15</sub> H <sub>14</sub> N <sub>2</sub> O <sub>2</sub>                   |
| Nepaprazole             | Antiulcerative            | 156601-79-5 |      | C <sub>18</sub> H <sub>19</sub> N <sub>3</sub> O <sub>2</sub> S                 |
| Nepicostat              | Cardiotonic               | 173997-05-2 | Y    | C <sub>14</sub> H <sub>15</sub> F <sub>2</sub> N <sub>3</sub> S                 |
| Nepinalone              | Hemostatic                | 22443-11-4  | Y    | C <sub>18</sub> H <sub>25</sub> NO                                              |
| Nequinat                | Antibacterial             | 13997-19-8  |      | C <sub>22</sub> H <sub>23</sub> NO <sub>4</sub>                                 |
| Neramexane Mesylate     | Antidepressant            | 219810-59-0 | Y    | C <sub>11</sub> H <sub>23</sub> N                                               |
| Neraminol               | Antihypotensive           | 86140-10-5  |      | C <sub>20</sub> H <sub>26</sub> N <sub>4</sub> O <sub>2</sub>                   |
| Nerbacadol              | Unclassified              | 99803-72-2  |      | C <sub>10</sub> H <sub>14</sub> N <sub>2</sub> O <sub>2</sub>                   |
| Neridronic Acid         | Bone Resorption Inhibitor | 79778-41-9  |      | C <sub>6</sub> H <sub>17</sub> NO <sub>7</sub> P <sub>2</sub>                   |
| Nerisopam               | Anxiolytic                | 102771-12-0 |      | C <sub>18</sub> H <sub>19</sub> N <sub>3</sub> O <sub>2</sub>                   |
| Nerispiridine           | Analgesic                 | 119229-65-1 |      | C <sub>17</sub> H <sub>18</sub> FN <sub>3</sub>                                 |
| Nesapidil               | Vasodilator               | 118778-75-9 |      | C <sub>23</sub> H <sub>28</sub> N <sub>4</sub> O <sub>4</sub>                   |
| Nesosteine              | Mucolytic                 | 84233-61-4  |      | C <sub>11</sub> H <sub>11</sub> NO <sub>3</sub> S                               |
| Nestifylline            | Bronchodilator            | 116763-36-1 |      | C <sub>11</sub> H <sub>14</sub> N <sub>4</sub> O <sub>2</sub> S <sub>2</sub>    |
| Neticonazole            | Antifungal                | 130726-68-0 |      | C <sub>17</sub> H <sub>22</sub> N <sub>2</sub> OS                               |
| Netilmicin              | Antibiotic                | 56391-56-1  |      | C <sub>21</sub> H <sub>41</sub> N <sub>5</sub> O <sub>7</sub>                   |
| Netivudine              | Antiviral                 | 84558-93-0  |      | C <sub>12</sub> H <sub>14</sub> N <sub>2</sub> O <sub>6</sub>                   |
| Netobimin               | Anthelminthic             | 88255-01-0  |      | C <sub>14</sub> H <sub>20</sub> N <sub>4</sub> O <sub>7</sub> S <sub>2</sub>    |
| Netoglitazone           | Antidiabetic              | 161600-01-7 |      | C <sub>21</sub> H <sub>16</sub> FNO <sub>3</sub> S                              |
| Netupitant              | Antiemetic                | 290297-26-6 |      | C <sub>30</sub> H <sub>32</sub> F <sub>6</sub> N <sub>4</sub> O                 |
| Neutramycin             | Antibacterial             | 1404-08-6   |      | C <sub>34</sub> H <sub>54</sub> O <sub>14</sub>                                 |
| Nevirapine              | Antiviral                 | 129618-40-2 | Y    | C <sub>15</sub> H <sub>14</sub> N <sub>4</sub> O                                |
| Nexeridine              | Analgesic                 | 53716-48-6  |      | C <sub>19</sub> H <sub>29</sub> NO <sub>2</sub>                                 |
| Nexopamil               | Antiarrhythmic            | 136033-49-3 |      | C <sub>24</sub> H <sub>40</sub> N <sub>2</sub> O <sub>3</sub>                   |
| Niacin                  | Dermatologic              | 59-67-6     | Y    | C <sub>6</sub> H <sub>5</sub> NO <sub>2</sub>                                   |
| Niacinamide             | Dermatologic              | 98-92-0     |      | C <sub>6</sub> H <sub>6</sub> N <sub>2</sub> O                                  |
| Nialamide               | Antidepressant            | 51-12-7     |      | C <sub>16</sub> H <sub>18</sub> N <sub>4</sub> O <sub>2</sub>                   |
| Niaprazine              | Sedative                  | 27367-90-4  |      | C <sub>20</sub> H <sub>25</sub> FN <sub>4</sub> O                               |
| Nibroxane               | Antibacterial             | 53983-00-9  |      | C <sub>5</sub> H <sub>8</sub> BrNO <sub>4</sub>                                 |
| Nicafenine              | Analgesic                 | 64039-88-9  |      | C <sub>24</sub> H <sub>19</sub> ClN <sub>4</sub> O <sub>3</sub>                 |
| Nicainoprol             | Antihypertensive          | 76252-06-7  |      | C <sub>21</sub> H <sub>27</sub> N <sub>3</sub> O <sub>3</sub>                   |
| Nicametate              | Vasodilator               | 3099-52-3   |      | C <sub>12</sub> H <sub>18</sub> N <sub>2</sub> O <sub>2</sub>                   |
| Nicanartine             | Antihyperlipidemic        | 150443-71-3 |      | C <sub>23</sub> H <sub>33</sub> NO <sub>2</sub>                                 |
| Nicaraven               | Cardiotonic               | 79455-30-4  |      | C <sub>15</sub> H <sub>16</sub> N <sub>4</sub> O <sub>2</sub>                   |
| Nicarbazine             | Antibacterial             | 587-90-6    |      | C <sub>13</sub> H <sub>10</sub> N <sub>4</sub> O <sub>5</sub>                   |
| Nicarbazine             | Antibacterial             | 108-79-2    |      | C <sub>6</sub> H <sub>8</sub> N <sub>2</sub> O                                  |
| Nicardipine             | Antianginal               | 55985-32-5  | Y    | C <sub>26</sub> H <sub>29</sub> N <sub>3</sub> O <sub>6</sub>                   |
| Nicergoline             | Vasodilator               | 27848-84-6  | Y    | C <sub>24</sub> H <sub>26</sub> BrN <sub>3</sub> O <sub>3</sub>                 |
| Niceritrol              | Antihyperlipidemic        | 5868-05-3   |      | C <sub>29</sub> H <sub>24</sub> N <sub>4</sub> O <sub>8</sub>                   |
| Niceverine              | Antispasmodic             | 2545-24-6   |      | C <sub>30</sub> H <sub>23</sub> N <sub>3</sub> O <sub>6</sub>                   |
| Niclofolan              | Anthelminthic             | 10331-57-4  |      | C <sub>12</sub> H <sub>6</sub> Cl <sub>2</sub> N <sub>2</sub> O <sub>6</sub>    |
| Niclosamide             | Anthelminthic             | 50-65-7     |      | C <sub>13</sub> H <sub>8</sub> Cl <sub>2</sub> N <sub>2</sub> O <sub>4</sub>    |
| Nicoboxil               | Analgesic                 | 13912-80-6  |      | C <sub>12</sub> H <sub>17</sub> NO <sub>3</sub>                                 |
| Nicoconlate             | Nootropic                 | 10571-59-2  |      | C <sub>16</sub> H <sub>16</sub> ClNO <sub>2</sub>                               |
| Nicodine                | Antitussive               | 3688-66-2   |      | C <sub>24</sub> H <sub>24</sub> N <sub>2</sub> O <sub>4</sub>                   |
| Nicocortonide           | Glucocorticoid            | 65415-41-0  |      | C <sub>31</sub> H <sub>37</sub> NO <sub>7</sub>                                 |
| Nicodicodine            | Antitussive               | 808-24-2    |      | C <sub>24</sub> H <sub>26</sub> N <sub>2</sub> O <sub>4</sub>                   |
| Nicofibrate             | Antihyperlipidemic        | 31980-29-7  |      | C <sub>16</sub> H <sub>16</sub> ClNO <sub>3</sub>                               |

Table S1. Cont.

| Common Name       | Indication           | CAS Number  | Oral | Molecular Formula                                                            |
|-------------------|----------------------|-------------|------|------------------------------------------------------------------------------|
| Nicofuranose      | Vasodilator          | 15351-13-0  |      | C <sub>30</sub> H <sub>24</sub> N <sub>4</sub> O <sub>10</sub>               |
| Nicofurate        | Unclassified         | 4397-91-5   |      | C <sub>35</sub> H <sub>28</sub> N <sub>4</sub> O <sub>11</sub>               |
| Nicogrelate       | Antithrombotic       | 80614-21-7  |      | C <sub>17</sub> H <sub>21</sub> N <sub>3</sub> O <sub>2</sub>                |
| Nicomol           | Capillary Protectant | 27959-26-8  |      | C <sub>34</sub> H <sub>32</sub> N <sub>4</sub> O <sub>9</sub>                |
| Nicomorphine      | Analgesic            | 639-48-5    |      | C <sub>29</sub> H <sub>25</sub> N <sub>3</sub> O <sub>5</sub>                |
| Nicopholine       | Analgesic            | 492-85-3    |      | C <sub>10</sub> H <sub>12</sub> N <sub>2</sub> O <sub>2</sub>                |
| Nicoracetam       | Nootropic            | 128326-80-7 |      | C <sub>11</sub> H <sub>12</sub> N <sub>2</sub> O <sub>3</sub>                |
| Nicorandil        | Vasodilator          | 65141-46-0  | Y    | C <sub>8</sub> H <sub>9</sub> N <sub>3</sub> O <sub>4</sub>                  |
| Nicothiazone      | Unclassified         | 555-90-8    |      | C <sub>7</sub> H <sub>8</sub> N <sub>4</sub> S                               |
| Nicotine          | Nootropic            | 54-11-5     | Y    | C <sub>10</sub> H <sub>14</sub> N <sub>2</sub>                               |
| Nicotinyl Alcohol | Vasodilator          | 100-55-0    |      | C <sub>6</sub> H <sub>7</sub> NO                                             |
| Nicotredole       | Unclassified         | 29876-14-0  |      | C <sub>16</sub> H <sub>15</sub> N <sub>3</sub> O                             |
| Nicoxamat         | Unclassified         | 5657-61-4   |      | C <sub>6</sub> H <sub>6</sub> N <sub>2</sub> O <sub>2</sub>                  |
| Nictiazem         | Antihypertensive     | 95058-70-1  |      | C <sub>26</sub> H <sub>27</sub> N <sub>3</sub> O <sub>4</sub> S              |
| Nictindole        | Antithrombotic       | 36504-64-0  |      | C <sub>17</sub> H <sub>16</sub> N <sub>2</sub> O                             |
| Nifedipine        | Antianginal          | 21829-25-4  | Y    | C <sub>17</sub> H <sub>18</sub> N <sub>2</sub> O <sub>6</sub>                |
| Nifekalant        | Cardiotonic          | 130636-43-0 |      | C <sub>19</sub> H <sub>27</sub> N <sub>5</sub> O <sub>5</sub>                |
| Nifenalol         | Antiarrhythmic       | 7413-36-7   |      | C <sub>11</sub> H <sub>16</sub> N <sub>2</sub> O <sub>3</sub>                |
| Nifenazone        | Antiinflammatory     | 2139-47-1   |      | C <sub>17</sub> H <sub>16</sub> N <sub>4</sub> O <sub>2</sub>                |
| Niflumic Acid     | Antiinflammatory     | 4394-00-7   |      | C <sub>13</sub> H <sub>9</sub> F <sub>3</sub> N <sub>2</sub> O <sub>2</sub>  |
| Nifluridide       | Ectoparasiticide     | 61444-62-0  |      | C <sub>10</sub> H <sub>6</sub> F <sub>7</sub> N <sub>3</sub> O <sub>3</sub>  |
| Nifuradene        | Antibiotic           | 555-84-0    |      | C <sub>8</sub> H <sub>8</sub> N <sub>4</sub> O <sub>4</sub>                  |
| Nifuraldezone     | Antibiotic           | 3270-71-1   |      | C <sub>7</sub> H <sub>6</sub> N <sub>4</sub> O <sub>5</sub>                  |
| Nifuralide        | Antibiotic           | 54657-96-4  |      | C <sub>14</sub> H <sub>13</sub> N <sub>5</sub> O <sub>4</sub> S              |
| Nifuratel         | Antibiotic           | 4936-47-4   |      | C <sub>10</sub> H <sub>11</sub> N <sub>3</sub> O <sub>5</sub> S              |
| Nifuratrone       | Antibiotic           | 19561-70-7  |      | C <sub>7</sub> H <sub>8</sub> N <sub>2</sub> O <sub>5</sub>                  |
| Nifurdazil        | Antibiotic           | 5036-03-3   |      | C <sub>10</sub> H <sub>12</sub> N <sub>4</sub> O <sub>5</sub>                |
| Nifurethazone     | Antibiotic           | 5580-25-6   |      | C <sub>10</sub> H <sub>15</sub> N <sub>5</sub> O <sub>4</sub>                |
| Nifurfoline       | Antibiotic           | 3363-58-4   |      | C <sub>13</sub> H <sub>15</sub> N <sub>5</sub> O <sub>6</sub>                |
| Nifurimide        | Antibiotic           | 21638-36-8  |      | C <sub>9</sub> H <sub>10</sub> N <sub>4</sub> O <sub>4</sub>                 |
| Nifurizone        | Antibiotic           | 26350-39-0  |      | C <sub>12</sub> H <sub>13</sub> N <sub>5</sub> O <sub>5</sub>                |
| Nifurmazole       | Antibiotic           | 18857-59-5  |      | C <sub>11</sub> H <sub>10</sub> N <sub>4</sub> O <sub>6</sub>                |
| Nifurmerone       | Antibiotic           | 5579-95-3   |      | C <sub>6</sub> H <sub>4</sub> CINO <sub>4</sub>                              |
| Nifuroquine       | Antibiotic           | 57474-29-0  |      | C <sub>14</sub> H <sub>8</sub> N <sub>2</sub> O <sub>6</sub>                 |
| Nifuroxazide      | Antibiotic           | 965-52-6    |      | C <sub>12</sub> H <sub>9</sub> N <sub>3</sub> O <sub>5</sub>                 |
| Nifuroxime        | Antibacterial        | 6236-05-1   |      | C <sub>5</sub> H <sub>4</sub> N <sub>2</sub> O <sub>4</sub>                  |
| Nifurpipone       | Antibiotic           | 24632-47-1  |      | C <sub>12</sub> H <sub>17</sub> N <sub>5</sub> O <sub>4</sub>                |
| Nifurpirinol      | Antibiotic           | 13411-16-0  |      | C <sub>12</sub> H <sub>10</sub> N <sub>2</sub> O <sub>4</sub>                |
| Nifurprazine      | Antibiotic           | 1614-20-6   |      | C <sub>10</sub> H <sub>8</sub> N <sub>4</sub> O <sub>3</sub>                 |
| Nifurquinazol     | Antibiotic           | 5055-20-9   |      | C <sub>16</sub> H <sub>16</sub> N <sub>4</sub> O <sub>5</sub>                |
| Nifursemizone     | Antiprotozoal        | 5579-89-5   |      | C <sub>8</sub> H <sub>10</sub> N <sub>4</sub> O <sub>4</sub>                 |
| Nifursol          | Antiprotozoal        | 16915-70-1  |      | C <sub>12</sub> H <sub>7</sub> N <sub>5</sub> O <sub>9</sub>                 |
| Nifurthiazole     | Antibiotic           | 3570-75-0   |      | C <sub>8</sub> H <sub>6</sub> N <sub>4</sub> O <sub>4</sub> S                |
| Nifurtimox        | Antibiotic           | 23256-30-6  | Y    | C <sub>10</sub> H <sub>13</sub> N <sub>3</sub> O <sub>5</sub> S              |
| Nifurtoinol       | Antibiotic           | 1088-92-2   |      | C <sub>9</sub> H <sub>8</sub> N <sub>4</sub> O <sub>6</sub>                  |
| Nifurvidine       | Antibiotic           | 1900-13-6   |      | C <sub>11</sub> H <sub>9</sub> N <sub>3</sub> O <sub>4</sub>                 |
| Nifurzide         | Antibiotic           | 39978-42-2  | Y    | C <sub>12</sub> H <sub>8</sub> N <sub>4</sub> O <sub>6</sub> S               |
| Niguldipine       | Antihypertensive     | 113165-32-5 |      | C <sub>36</sub> H <sub>39</sub> N <sub>3</sub> O <sub>6</sub>                |
| Nihydrazone       | Antibacterial        | 67-28-7     |      | C <sub>7</sub> H <sub>7</sub> N <sub>3</sub> O <sub>4</sub>                  |
| Nikethamide       | Nootropic            | 59-26-7     |      | C <sub>10</sub> H <sub>14</sub> N <sub>2</sub> O                             |
| Nileprost         | Prostaglandin        | 71097-83-1  |      | C <sub>22</sub> H <sub>33</sub> NO <sub>5</sub>                              |
| Nilprazole        | Antitumor            | 60662-19-3  |      | C <sub>26</sub> H <sub>33</sub> N <sub>5</sub> O <sub>2</sub>                |
| Niludipine        | Antianginal          | 22609-73-0  |      | C <sub>25</sub> H <sub>34</sub> N <sub>2</sub> O <sub>8</sub>                |
| Nilutamide        | Antineoplastic       | 63612-50-0  | Y    | C <sub>12</sub> H <sub>10</sub> F <sub>3</sub> N <sub>3</sub> O <sub>4</sub> |
| Nilvadipine       | Antianginal          | 75530-68-6  | Y    | C <sub>19</sub> H <sub>19</sub> N <sub>3</sub> O <sub>6</sub>                |
| Nimazone          | Antiinflammatory     | 17230-89-6  |      | C <sub>11</sub> H <sub>9</sub> CIN <sub>4</sub> O                            |
| Nimesulide        | Antiinflammatory     | 51803-78-2  | Y    | C <sub>13</sub> H <sub>12</sub> N <sub>2</sub> O <sub>5</sub> S              |
| Nimetazepam       | Muscle Relaxant      | 2011-67-8   |      | C <sub>16</sub> H <sub>13</sub> N <sub>3</sub> O <sub>3</sub>                |
| Nimidane          | Antiprotozoal        | 50435-25-1  |      | C <sub>9</sub> H <sub>8</sub> CINS <sub>2</sub>                              |
| Nimodipine        | Vasodilator          | 66085-59-4  | Y    | C <sub>21</sub> H <sub>26</sub> N <sub>2</sub> O <sub>7</sub>                |
| Nimorazole        | Antiprotozoal        | 6506-37-2   |      | C <sub>9</sub> H <sub>14</sub> N <sub>4</sub> O <sub>3</sub>                 |
| Nimustine         | Antineoplastic       | 42471-28-3  |      | C <sub>9</sub> H <sub>13</sub> CIN <sub>6</sub> O <sub>2</sub>               |
| Niometacin        | Antiinflammatory     | 16426-83-8  |      | C <sub>18</sub> H <sub>16</sub> N <sub>2</sub> O <sub>4</sub>                |

Table S1. Cont.

| Common Name                    | Indication           | CAS Number  | Oral | Molecular Formula                                                               |
|--------------------------------|----------------------|-------------|------|---------------------------------------------------------------------------------|
| Niperotidine                   | Antiulcerative       | 84845-75-0  |      | C <sub>20</sub> H <sub>26</sub> N <sub>4</sub> O <sub>5</sub> S                 |
| Nipradilol                     | Antianginal          | 81486-22-8  | Y    | C <sub>15</sub> H <sub>22</sub> N <sub>2</sub> O <sub>6</sub>                   |
| Niprofazon                     | Antiinflammatory     | 15387-10-7  |      | C <sub>21</sub> H <sub>25</sub> N <sub>5</sub> O <sub>2</sub>                   |
| Niravoline                     | Diuretic             | 130610-93-4 |      | C <sub>22</sub> H <sub>25</sub> N <sub>3</sub> O <sub>3</sub>                   |
| Niridazole                     | Anthelminthic        | 61-57-4     |      | C <sub>6</sub> H <sub>6</sub> N <sub>4</sub> O <sub>3</sub> S                   |
| Nisbuterol Mesylate            | Bronchodilator       | 57540-78-0  |      | C <sub>22</sub> H <sub>27</sub> NO <sub>6</sub>                                 |
| Nisobamate                     | Sedative             | 25269-04-9  |      | C <sub>13</sub> H <sub>26</sub> N <sub>2</sub> O <sub>4</sub>                   |
| Nisoldipine                    | Antihypertensive     | 63675-72-9  | Y    | C <sub>20</sub> H <sub>24</sub> N <sub>2</sub> O <sub>6</sub>                   |
| Nisoxetine                     | Antidepressant       | 53179-07-0  |      | C <sub>17</sub> H <sub>21</sub> NO <sub>2</sub>                                 |
| Nisterime Acetate              | Androgen             | 51354-31-5  |      | C <sub>27</sub> H <sub>35</sub> N <sub>2</sub> O <sub>5</sub>                   |
| Nitarson                       | Antiprotozoal        | 98-72-6     |      | C <sub>6</sub> H <sub>6</sub> AsNO <sub>5</sub>                                 |
| Nitazoxanide                   | Anthelminthic        | 55981-09-4  | Y    | C <sub>12</sub> H <sub>9</sub> N <sub>3</sub> O <sub>5</sub> S                  |
| Nitecapone                     | Capillary Protectant | 116313-94-1 |      | C <sub>12</sub> H <sub>11</sub> NO <sub>6</sub>                                 |
| Nithiamide                     | Antiprotozoal        | 140-40-9    |      | C <sub>5</sub> H <sub>5</sub> N <sub>3</sub> O <sub>3</sub> S                   |
| Nitisinone                     | Dermatologic         | 104206-65-7 | Y    | C <sub>14</sub> H <sub>10</sub> F <sub>3</sub> NO <sub>5</sub>                  |
| Nitracrine                     | Antidepressant       | 4533-39-5   |      | C <sub>18</sub> H <sub>20</sub> N <sub>4</sub> O <sub>2</sub>                   |
| Nitrafudam                     | Antidepressant       | 64743-09-5  |      | C <sub>11</sub> H <sub>9</sub> N <sub>3</sub> O <sub>3</sub>                    |
| Nitralamine                    | Antifungal           | 71872-90-7  |      | C <sub>10</sub> H <sub>13</sub> ClN <sub>2</sub> O <sub>2</sub> S               |
| Nitramisole                    | Anthelminthic        | 6646-49-7   |      | C <sub>11</sub> H <sub>11</sub> N <sub>3</sub> O <sub>2</sub> S                 |
| Nitraquazone                   | Antiinflammatory     | 56739-21-0  |      | C <sub>16</sub> H <sub>13</sub> N <sub>3</sub> O <sub>4</sub>                   |
| Nitrazepam                     | Anticonvulsant       | 146-22-5    | Y    | C <sub>15</sub> H <sub>11</sub> N <sub>3</sub> O <sub>3</sub>                   |
| Nitrefazole                    | Alcohol Deterrant    | 21721-92-6  |      | C <sub>10</sub> H <sub>8</sub> N <sub>4</sub> O <sub>4</sub>                    |
| Nitrendipine                   | Antihypertensive     | 39562-70-4  | Y    | C <sub>18</sub> H <sub>20</sub> N <sub>2</sub> O <sub>6</sub>                   |
| Nitricholine Perchlorate       | Cholinergic          | 7009-91-8   |      | C <sub>5</sub> H <sub>13</sub> ClN <sub>2</sub> O <sub>7</sub>                  |
| Nitrocefin                     | Antibiotic           | 41906-86-9  |      | C <sub>21</sub> H <sub>16</sub> N <sub>4</sub> O <sub>8</sub> S <sub>2</sub>    |
| Nitroclofene                   | Anthelminthic        | 39224-48-1  |      | C <sub>13</sub> H <sub>8</sub> Cl <sub>2</sub> N <sub>2</sub> O <sub>6</sub>    |
| Nitrocycline                   | Antibacterial        | 5585-59-1   |      | C <sub>21</sub> H <sub>21</sub> N <sub>3</sub> O <sub>9</sub>                   |
| Nitrodan                       | Anthelminthic        | 962-02-7    |      | C <sub>10</sub> H <sub>8</sub> N <sub>4</sub> O <sub>5</sub> S <sub>2</sub>     |
| Nitrofurantoin                 | Antibiotic           | 67-20-9     | Y    | C <sub>8</sub> H <sub>6</sub> N <sub>4</sub> O <sub>5</sub>                     |
| Nitroglycerin                  | Antianginal          | 55-63-0     |      | C <sub>3</sub> H <sub>5</sub> N <sub>3</sub> O <sub>9</sub>                     |
| Nitromide                      | Antibacterial        | 121-81-3    |      | C <sub>7</sub> H <sub>5</sub> N <sub>3</sub> O <sub>5</sub>                     |
| Nitromifene                    | Steroid              | 10448-84-7  |      | C <sub>27</sub> H <sub>28</sub> N <sub>2</sub> O <sub>4</sub>                   |
| Nitroscanate                   | Anthelminthic        | 19881-18-6  |      | C <sub>13</sub> H <sub>8</sub> N <sub>2</sub> O <sub>3</sub> S                  |
| Nitrovin                       | Antibacterial        | 804-36-4    |      | C <sub>14</sub> H <sub>12</sub> N <sub>6</sub> O <sub>6</sub>                   |
| Nitroxinil                     | Anthelminthic        | 1689-89-0   |      | C <sub>7</sub> H <sub>3</sub> IN <sub>2</sub> O <sub>3</sub>                    |
| Nitroxoline                    | Antibiotic           | 4008-48-4   |      | C <sub>9</sub> H <sub>6</sub> N <sub>2</sub> O <sub>3</sub>                     |
| Nivazol                        | Glucocorticoid       | 24358-76-7  |      | C <sub>28</sub> H <sub>31</sub> FN <sub>2</sub> O                               |
| Nixylic Acid                   | Unclassified         | 4394-05-2   |      | C <sub>14</sub> H <sub>14</sub> N <sub>2</sub> O <sub>2</sub>                   |
| Nizatidine                     | Antiulcerative       | 76963-41-2  | Y    | C <sub>12</sub> H <sub>21</sub> N <sub>5</sub> O <sub>2</sub> S <sub>2</sub>    |
| Nizofenone                     | Nootropic            | 54533-85-6  |      | C <sub>21</sub> H <sub>21</sub> ClN <sub>4</sub> O <sub>3</sub>                 |
| N Methylepinephrine            | Antihypotensive      | 554-99-4    |      | C <sub>10</sub> H <sub>15</sub> NO <sub>3</sub>                                 |
| N Myristyl 3 Hydroxybutylamine | Unclassified         | 143-26-0    |      | C <sub>18</sub> H <sub>39</sub> NO                                              |
| Noberastine                    | Antihistaminic       | 110588-56-2 |      | C <sub>17</sub> H <sub>21</sub> N <sub>5</sub> O                                |
| Nocloprost                     | Prostaglandin        | 79360-43-3  |      | C <sub>22</sub> H <sub>37</sub> ClO <sub>4</sub>                                |
| Nocodazole                     | Antineoplastic       | 31430-18-9  |      | C <sub>14</sub> H <sub>11</sub> N <sub>3</sub> O <sub>3</sub> S                 |
| Nofecainide                    | Antiarrhythmic       | 50516-43-3  |      | C <sub>20</sub> H <sub>24</sub> N <sub>2</sub> O <sub>3</sub>                   |
| Nogalamycin                    | Antineoplastic       | 1404-15-5   |      | C <sub>39</sub> H <sub>49</sub> NO <sub>16</sub>                                |
| Nolatrexed                     | Antineoplastic       | 147149-76-6 |      | C <sub>14</sub> H <sub>12</sub> N <sub>4</sub> OS                               |
| Nolinium Bromide               | Antiulcerative       | 40759-33-9  |      | C <sub>15</sub> H <sub>11</sub> BrCl <sub>2</sub> N <sub>2</sub>                |
| Nolomirole                     | Cardiotonic          | 90060-42-7  |      | C <sub>19</sub> H <sub>27</sub> NO <sub>4</sub>                                 |
| Nolpitantium Besilate          | Bronchodilator       | 155418-06-7 |      | C <sub>43</sub> H <sub>50</sub> Cl <sub>2</sub> N <sub>2</sub> O <sub>5</sub> S |
| Nomegestrol Acetate            | Progestogen          | 58652-20-3  |      | C <sub>23</sub> H <sub>30</sub> O <sub>4</sub>                                  |
| Nomelidine                     | Anesthetic           | 60324-59-6  |      | C <sub>15</sub> H <sub>15</sub> BrN <sub>2</sub>                                |
| Nomifensine                    | Antidepressant       | 24526-64-5  |      | C <sub>16</sub> H <sub>18</sub> N <sub>2</sub>                                  |
| Nonabine                       | Antiemetic           | 16985-03-8  |      | C <sub>25</sub> H <sub>33</sub> NO <sub>2</sub>                                 |
| Nonaperone                     | Antipsychotic        | 15997-76-9  |      | C <sub>18</sub> H <sub>24</sub> FNO                                             |
| Nonapyrimine                   | Unclassified         | 5626-36-8   |      | C <sub>15</sub> H <sub>24</sub> N <sub>4</sub>                                  |
| Nonathymulin                   | Thyroid              | 63958-90-7  |      | C <sub>33</sub> H <sub>54</sub> N <sub>12</sub> O <sub>15</sub>                 |
| Nonivamide                     | Nootropic            | 2444-46-4   |      | C <sub>17</sub> H <sub>27</sub> NO <sub>3</sub>                                 |
| Noracymethadol                 | Analgesic            | 1477-39-0   |      | C <sub>22</sub> H <sub>29</sub> NO <sub>2</sub>                                 |
| Norbolethone                   | Steroid              | 1235-15-0   |      | C <sub>21</sub> H <sub>32</sub> O <sub>2</sub>                                  |
| Norbudrine                     | Antihypotensive      | 127560-12-7 |      | C <sub>12</sub> H <sub>17</sub> NO <sub>3</sub>                                 |
| Norclostebol                   | Steroid              | 13583-21-6  |      | C <sub>18</sub> H <sub>25</sub> ClO <sub>2</sub>                                |

Table S1. Cont.

| Common Name                | Indication       | CAS Number  | Oral | Molecular Formula                                                             |
|----------------------------|------------------|-------------|------|-------------------------------------------------------------------------------|
| Norcodeine                 | Analgesic        | 467-15-2    |      | C <sub>17</sub> H <sub>19</sub> NO <sub>3</sub>                               |
| Nordazepam                 | Anxiolytic       | 1088-11-5   | Y    | C <sub>15</sub> H <sub>11</sub> ClN <sub>2</sub> O                            |
| Nordefrin                  | Antihypotensive  | 74812-63-8  |      | C <sub>9</sub> H <sub>13</sub> NO <sub>3</sub>                                |
| Nordihydroguaiaretic Acid  | Antiinflammatory | 500-38-9    |      | C <sub>18</sub> H <sub>22</sub> O <sub>4</sub>                                |
| Norelgestromin             | Contraceptive    | 53016-31-2  |      | C <sub>21</sub> H <sub>29</sub> NO <sub>2</sub>                               |
| Norepinephrine             | Antihypotensive  | 51-41-2     |      | C <sub>8</sub> H <sub>11</sub> NO <sub>3</sub>                                |
| Norethandrolone            | Androgen         | 52-78-8     |      | C <sub>20</sub> H <sub>30</sub> O <sub>2</sub>                                |
| Norethindrone              | Progestogen      | 68-22-4     | Y    | C <sub>20</sub> H <sub>26</sub> O <sub>2</sub>                                |
| Norethindrone Acetate      | Progestogen      | 51-98-9     |      | C <sub>22</sub> H <sub>28</sub> O <sub>3</sub>                                |
| Norethynodrel              | Progestogen      | 68-23-5     |      | C <sub>20</sub> H <sub>26</sub> O <sub>2</sub>                                |
| Noreximide                 | Sedative         | 6319-06-8   |      | C <sub>9</sub> H <sub>9</sub> NO <sub>2</sub>                                 |
| Norfefrine                 | Antihypotensive  | 536-21-0    |      | C <sub>8</sub> H <sub>11</sub> NO <sub>2</sub>                                |
| Norfloxacin                | Antibiotic       | 70458-96-7  | Y    | C <sub>16</sub> H <sub>18</sub> FN <sub>3</sub> O <sub>3</sub>                |
| Norfloxacin Succinil       | Antibiotic       | 100587-52-8 |      | C <sub>20</sub> H <sub>22</sub> FN <sub>3</sub> O <sub>6</sub>                |
| Norflurane                 | Anesthetic       | 811-97-2    |      | C <sub>2</sub> H <sub>2</sub> F <sub>4</sub>                                  |
| Norgesterone               | Progestogen      | 13563-60-5  |      | C <sub>20</sub> H <sub>28</sub> O <sub>2</sub>                                |
| Norgestimate               | Progestogen      | 35189-28-7  |      | C <sub>23</sub> H <sub>31</sub> NO <sub>3</sub>                               |
| Norgestomet                | Progestogen      | 25092-41-5  |      | C <sub>23</sub> H <sub>32</sub> O <sub>4</sub>                                |
| Norgestrel                 | Progestogen      | 6533-00-2   |      | C <sub>21</sub> H <sub>28</sub> O <sub>2</sub>                                |
| Norgestrienone             | Progestogen      | 848-21-5    |      | C <sub>20</sub> H <sub>28</sub> O <sub>2</sub>                                |
| Norletimol                 | Unclassified     | 886-08-8    |      | C <sub>14</sub> H <sub>13</sub> NO                                            |
| Norlevorphanol             | Analgesic        | 1531-12-0   |      | C <sub>16</sub> H <sub>21</sub> NO                                            |
| Normethadone               | Antitussive      | 467-85-6    |      | C <sub>20</sub> H <sub>25</sub> NO                                            |
| Normethandrone             | Androgen         | 514-61-4    |      | C <sub>19</sub> H <sub>28</sub> O <sub>2</sub>                                |
| Normorphine                | Analgesic        | 466-97-7    |      | C <sub>16</sub> H <sub>17</sub> NO <sub>3</sub>                               |
| Norpiprane                 | Analgesic        | 561-48-8    |      | C <sub>23</sub> H <sub>29</sub> NO                                            |
| Nortetrazepam              | Anxiolytic       | 10379-11-0  |      | C <sub>15</sub> H <sub>15</sub> ClN <sub>2</sub> O                            |
| Nortopixantrone            | Antineoplastic   | 156090-17-4 |      | C <sub>20</sub> H <sub>24</sub> N <sub>6</sub> O <sub>2</sub>                 |
| Nortriptyline              | Antidepressant   | 72-69-5     | Y    | C <sub>19</sub> H <sub>21</sub> N                                             |
| Norvinisterone             | Progestogen      | 6795-60-4   |      | C <sub>20</sub> H <sub>28</sub> O <sub>2</sub>                                |
| Nosantine                  | Antineoplastic   | 76600-30-1  |      | C <sub>14</sub> H <sub>22</sub> N <sub>4</sub> O <sub>2</sub>                 |
| Noscapine                  | Antitussive      | 128-62-1    | Y    | C <sub>22</sub> H <sub>23</sub> NO <sub>7</sub>                               |
| Novobiocin                 | Antibacterial    | 303-81-1    |      | C <sub>31</sub> H <sub>36</sub> N <sub>2</sub> O <sub>11</sub>                |
| Noxiptiline                | Antidepressant   | 3362-45-6   |      | C <sub>19</sub> H <sub>22</sub> N <sub>2</sub> O                              |
| Nuclomedone                | Antihistamine    | 75963-52-9  |      | C <sub>13</sub> H <sub>11</sub> ClN <sub>2</sub> O <sub>2</sub> S             |
| Nuclotixene                | Antidepressant   | 36471-39-3  |      | C <sub>21</sub> H <sub>20</sub> ClNS                                          |
| Nufenoxole                 | Gastroprokinetic | 57726-65-5  |      | C <sub>25</sub> H <sub>29</sub> N <sub>3</sub> O                              |
| Nupafant                   | Antithrombotic   | 139133-27-0 |      | C <sub>23</sub> H <sub>32</sub> N <sub>4</sub> O <sub>3</sub> S               |
| Nuvenzepine                | Gastroprokinetic | 96487-37-5  |      | C <sub>19</sub> H <sub>20</sub> N <sub>4</sub> O <sub>2</sub>                 |
| Nylestriol                 | Estrogen         | 39791-20-3  |      | C <sub>25</sub> H <sub>32</sub> O <sub>3</sub>                                |
| Nylidrin                   | Vasodilator      | 447-41-6    |      | C <sub>19</sub> H <sub>25</sub> NO <sub>2</sub>                               |
| Oberadilol                 | Antianginal      | 114856-44-9 | Y    | C <sub>25</sub> H <sub>30</sub> ClN <sub>5</sub> O <sub>3</sub>               |
| Obidoxime Chloride         | Antidote         | 114-90-9    |      | C <sub>14</sub> H <sub>16</sub> Cl <sub>2</sub> N <sub>4</sub> O <sub>3</sub> |
| Ocaperidone                | Antipsychotic    | 129029-23-8 |      | C <sub>24</sub> H <sub>25</sub> FN <sub>4</sub> O <sub>2</sub>                |
| Ocfentanil                 | Analgesic        | 101343-69-5 |      | C <sub>22</sub> H <sub>27</sub> FN <sub>2</sub> O <sub>2</sub>                |
| Ociltide                   | Antidiabetic     | 78410-57-8  |      | C <sub>31</sub> H <sub>40</sub> N <sub>6</sub> O <sub>7</sub> S               |
| Ocinaplon                  | Anxiolytic       | 96604-21-6  |      | C <sub>17</sub> H <sub>11</sub> N <sub>5</sub> O                              |
| Ocrylate                   | Dermatologic     | 6701-17-3   |      | C <sub>12</sub> H <sub>19</sub> NO <sub>2</sub>                               |
| Octabenzone                | Dermatologic     | 1843-05-6   |      | C <sub>21</sub> H <sub>26</sub> O <sub>3</sub>                                |
| Octacaine                  | Anesthetic       | 13912-77-1  |      | C <sub>14</sub> H <sub>22</sub> N <sub>2</sub> O                              |
| Octadecyltrimethylammonium | Unclassified     | 488-40-4    |      | C <sub>27</sub> H <sub>46</sub> Cl <sub>5</sub> NO                            |
| Pentachlorophenate         | Unclassified     |             |      |                                                                               |
| Octamoxin                  | Antidepressant   | 4684-87-1   |      | C <sub>8</sub> H <sub>20</sub> N <sub>2</sub>                                 |
| Octamylamine               | Antispasmodic    | 502-59-0    |      | C <sub>13</sub> H <sub>29</sub> N                                             |
| Octanoic Acid              | Antifungal       | 124-07-2    |      | C <sub>8</sub> H <sub>16</sub> O <sub>2</sub>                                 |
| Octapinol                  | Antibacterial    | 71138-71-1  |      | C <sub>15</sub> H <sub>31</sub> NO                                            |
| Octastine                  | Antihistaminic   | 59767-12-3  |      | C <sub>23</sub> H <sub>30</sub> ClNO                                          |
| Octaverine                 | Antispasmodic    | 549-68-8    |      | C <sub>23</sub> H <sub>27</sub> NO <sub>5</sub>                               |
| Octazamide                 | Analgesic        | 56391-55-0  |      | C <sub>13</sub> H <sub>15</sub> NO <sub>2</sub>                               |
| Octimibate                 | Anticoagulant    | 89838-96-0  |      | C <sub>29</sub> H <sub>30</sub> N <sub>2</sub> O <sub>3</sub>                 |
| Octinoxate                 | Dermatologic     | 5466-77-3   |      | C <sub>18</sub> H <sub>26</sub> O <sub>3</sub>                                |
| Octisalate                 | Dermatologic     | 118-60-5    |      | C <sub>15</sub> H <sub>22</sub> O <sub>3</sub>                                |
| Octocrylene                | Dermatologic     | 6197-30-4   |      | C <sub>24</sub> H <sub>27</sub> NO <sub>2</sub>                               |



Table S1. Cont.

| Common Name            | Indication                | CAS Number  | Oral | Molecular Formula                                                             |
|------------------------|---------------------------|-------------|------|-------------------------------------------------------------------------------|
| Octodrine              | Decongestant              | 543-82-8    |      | C <sub>8</sub> H <sub>19</sub> N                                              |
| Octopamine             | Antihypotensive           | 104-14-3    |      | C <sub>8</sub> H <sub>11</sub> NO <sub>2</sub>                                |
| Octriptyline Phosphate | Antidepressant            | 47166-67-6  |      | C <sub>20</sub> H <sub>21</sub> N                                             |
| Octrizole              | Dermatologic              | 3147-75-9   |      | C <sub>20</sub> H <sub>25</sub> N <sub>3</sub> O                              |
| Odalprofen             | Analgesic                 | 137460-88-9 |      | C <sub>20</sub> H <sub>20</sub> N <sub>2</sub> O <sub>2</sub>                 |
| Odapipam               | Sedative                  | 131796-63-9 |      | C <sub>19</sub> H <sub>20</sub> CINO <sub>2</sub>                             |
| Odiparil               | Antithrombotic            | 137215-12-4 |      | C <sub>15</sub> H <sub>16</sub> O <sub>6</sub> S                              |
| Ofloxacin              | Antibiotic                | 82419-36-1  | Y    | C <sub>18</sub> H <sub>20</sub> FN <sub>3</sub> O <sub>4</sub>                |
| Oformine               | Antihypertensive          | 87784-12-1  |      | C <sub>17</sub> H <sub>19</sub> N <sub>3</sub> O                              |
| Oftasceine             | Antineoplastic            | 1461-15-0   |      | C <sub>30</sub> H <sub>26</sub> N <sub>2</sub> O <sub>13</sub>                |
| Oglufanide Disodium    | Immunomodulator           | 38101-59-6  |      | C <sub>16</sub> H <sub>19</sub> N <sub>3</sub> O <sub>5</sub>                 |
| Olafur                 | Antibacterial             | 17671-49-7  |      | C <sub>27</sub> H <sub>58</sub> N <sub>2</sub> O <sub>3</sub>                 |
| Olamufloxacin          | Antibiotic                | 167887-97-0 |      | C <sub>20</sub> H <sub>23</sub> FN <sub>4</sub> O <sub>3</sub>                |
| Olanexidine            | Antibacterial             | 146510-36-3 |      | C <sub>17</sub> H <sub>27</sub> Cl <sub>2</sub> N <sub>5</sub>                |
| Olanzapine             | Antipsychotic             | 132539-06-1 | Y    | C <sub>17</sub> H <sub>20</sub> N <sub>4</sub> S                              |
| Olaquinox              | Antibacterial             | 23696-28-8  |      | C <sub>12</sub> H <sub>13</sub> N <sub>3</sub> O <sub>4</sub>                 |
| Olcegepant             | Antimigraine              | 204697-65-4 |      | C <sub>38</sub> H <sub>47</sub> Br <sub>2</sub> N <sub>9</sub> O <sub>5</sub> |
| Oleandomycin Phosphate | Antibiotic                | 3922-90-5   |      | C <sub>35</sub> H <sub>61</sub> NO <sub>12</sub>                              |
| Oletimol               | Unclassified              | 5879-67-4   |      | C <sub>15</sub> H <sub>15</sub> NO                                            |
| Olmesartan             | Antihypertensive          | 144689-24-7 | Y    | C <sub>24</sub> H <sub>26</sub> N <sub>6</sub> O <sub>3</sub>                 |
| Olmesartan Medoxomil   | Antihypertensive          | 144689-63-4 | Y    | C <sub>29</sub> H <sub>30</sub> N <sub>6</sub> O <sub>6</sub>                 |
| Olmidine               | Antihypertensive          | 31105-14-3  |      | C <sub>9</sub> H <sub>10</sub> N <sub>2</sub> O <sub>3</sub>                  |
| Olopatadine            | Antihistaminic            | 113806-05-6 | Y    | C <sub>21</sub> H <sub>23</sub> NO <sub>3</sub>                               |
| Olpadronic Acid        | Bone Resorption Inhibitor | 63132-39-8  |      | C <sub>5</sub> H <sub>15</sub> NO <sub>7</sub> P <sub>2</sub>                 |
| Olpimedone             | Antihistaminic            | 39567-20-9  |      | C <sub>7</sub> H <sub>10</sub> N <sub>2</sub> OS                              |
| Olprinone              | Cardiotonic               | 106730-54-5 |      | C <sub>14</sub> H <sub>10</sub> N <sub>4</sub> O                              |
| Olradipine             | Antiparkinsonian          | 115972-78-6 |      | C <sub>22</sub> H <sub>28</sub> Cl <sub>2</sub> N <sub>2</sub> O <sub>6</sub> |
| Olsalazine             | Antiinflammatory          | 15722-48-2  |      | C <sub>14</sub> H <sub>10</sub> N <sub>2</sub> O <sub>6</sub>                 |
| Oltipraz               | Antiviral                 | 64224-21-1  |      | C <sub>8</sub> H <sub>6</sub> N <sub>2</sub> S <sub>3</sub>                   |
| Olvanil                | Analgesic                 | 58493-49-5  |      | C <sub>26</sub> H <sub>43</sub> NO <sub>3</sub>                               |
| Omaciclovir            | Antiviral                 | 124265-89-0 |      | C <sub>10</sub> H <sub>15</sub> N <sub>5</sub> O <sub>3</sub>                 |
| Omapatrilat            | Antihypertensive          | 167305-00-2 |      | C <sub>19</sub> H <sub>24</sub> N <sub>2</sub> O <sub>4</sub> S <sub>2</sub>  |
| Omeprazole             | Antilulcerative           | 73590-58-6  | Y    | C <sub>17</sub> H <sub>19</sub> N <sub>3</sub> O <sub>3</sub> S               |
| Omidoline              | Analgesic                 | 21590-91-0  |      | C <sub>22</sub> H <sub>27</sub> N <sub>3</sub> O <sub>2</sub>                 |
| Omigapil               | Nootropic                 | 181296-84-4 |      | C <sub>19</sub> H <sub>17</sub> NO                                            |
| Omiloxetine            | Antidepressant            | 176894-09-0 |      | C <sub>27</sub> H <sub>25</sub> F <sub>2</sub> NO <sub>4</sub>                |
| Omoconazole Nitrate    | Antifungal                | 74512-12-2  |      | C <sub>20</sub> H <sub>17</sub> Cl <sub>3</sub> N <sub>2</sub> O <sub>2</sub> |
| Omonasteine            | Mucolytic                 | 60175-95-3  |      | C <sub>5</sub> H <sub>9</sub> NO <sub>2</sub> S                               |
| Onapristone            | Progestogen               | 96346-61-1  |      | C <sub>29</sub> H <sub>39</sub> NO <sub>3</sub>                               |
| Ondansetron            | Antiemetic                | 99614-02-5  | Y    | C <sub>18</sub> H <sub>19</sub> N <sub>3</sub> O                              |
| Ontazolast             | Bronchodilator            | 147432-77-7 |      | C <sub>21</sub> H <sub>25</sub> N <sub>3</sub> O                              |
| Ontianil               | Unclassified              | 35727-72-1  |      | C <sub>13</sub> H <sub>12</sub> CINO <sub>2</sub> S                           |
| Opanixil               | Antihypertensive          | 152939-42-9 |      | C <sub>19</sub> H <sub>21</sub> F <sub>3</sub> N <sub>6</sub> O <sub>2</sub>  |
| Opaviraline            | Antiviral                 | 178040-94-3 |      | C <sub>14</sub> H <sub>17</sub> FN <sub>2</sub> O <sub>3</sub>                |
| Opiniazide             | Antibacterial             | 2779-55-7   |      | C <sub>16</sub> H <sub>15</sub> N <sub>3</sub> O <sub>5</sub>                 |
| Opipramol              | Antidepressant            | 315-72-0    | Y    | C <sub>23</sub> H <sub>29</sub> N <sub>3</sub> O                              |
| Opratonium Iodide      | Cholinergic               | 146919-78-0 |      | C <sub>17</sub> H <sub>35</sub> N <sub>2</sub> O.I                            |
| Orazamide              | Hepatic Protectant        | 360-97-4    |      | C <sub>4</sub> H <sub>6</sub> N <sub>4</sub> O                                |
| Orazipone              | Antiinflammatory          | 137109-78-5 |      | C <sub>13</sub> H <sub>14</sub> O <sub>4</sub> S                              |
| Orbifloxacin           | Antibiotic                | 113617-63-3 |      | C <sub>19</sub> H <sub>20</sub> F <sub>3</sub> N <sub>3</sub> O <sub>3</sub>  |
| Orbofiban Acetate      | Antithrombotic            | 163250-90-6 |      | C <sub>17</sub> H <sub>23</sub> N <sub>5</sub> O <sub>4</sub>                 |
| Orbutopril             | Antihypertensive          | 108391-88-4 |      | C <sub>20</sub> H <sub>34</sub> N <sub>2</sub> O <sub>5</sub>                 |
| Orconazole Nitrate     | Antifungal                | 22833-02-9  |      | C <sub>18</sub> H <sub>15</sub> Cl <sub>3</sub> N <sub>2</sub> O              |
| Orestrate              | Unclassified              | 13885-31-9  |      | C <sub>27</sub> H <sub>36</sub> O <sub>3</sub>                                |
| Orlistat               | Antiobesity               | 96829-58-2  | Y    | C <sub>29</sub> H <sub>53</sub> NO <sub>5</sub>                               |
| Ormeloxifene           | Bone Resorption Inhibitor | 31477-60-8  |      | C <sub>30</sub> H <sub>35</sub> NO <sub>3</sub>                               |
| Ormetoprim             | Antibacterial             | 6981-18-6   |      | C <sub>14</sub> H <sub>18</sub> N <sub>4</sub> O <sub>2</sub>                 |
| Ornidazole             | Antibacterial             | 16773-42-5  |      | C <sub>7</sub> H <sub>10</sub> CIN <sub>3</sub> O <sub>3</sub>                |
| Ornoprostil            | Prostaglandin             | 70667-26-4  |      | C <sub>23</sub> H <sub>38</sub> O <sub>6</sub>                                |
| Orotic Acid            | Uricosuric                | 65-86-1     |      | C <sub>5</sub> H <sub>4</sub> N <sub>2</sub> O <sub>4</sub>                   |
| Orotirelin             | Thyroid                   | 62305-86-6  |      | C <sub>16</sub> H <sub>19</sub> N <sub>7</sub> O <sub>5</sub>                 |
| Orpanoxin              | Antiinflammatory          | 60653-25-0  |      | C <sub>13</sub> H <sub>11</sub> ClO <sub>4</sub>                              |
| Orphenadrine Citrate   | Muscle Relaxant           | 83-98-7     |      | C <sub>18</sub> H <sub>23</sub> NO                                            |

Table S1. Cont.

| Common Name         | Indication                | CAS Number  | Oral | Molecular Formula                                                              |
|---------------------|---------------------------|-------------|------|--------------------------------------------------------------------------------|
| Ortataxel           | Antineoplastic            | 186348-23-2 |      | C <sub>44</sub> H <sub>57</sub> NO <sub>17</sub>                               |
| Ortetamine          | Antineoplastic            | 5580-32-5   |      | C <sub>10</sub> H <sub>15</sub> N                                              |
| Osalmid             | Choleretic                | 526-18-1    |      | C <sub>13</sub> H <sub>11</sub> NO <sub>3</sub>                                |
| Osanetant           | Antihistaminic            | 160492-56-8 |      | C <sub>35</sub> H <sub>41</sub> Cl <sub>2</sub> N <sub>3</sub> O <sub>2</sub>  |
| Osaterone           | Steroid                   | 105149-04-0 |      | C <sub>20</sub> H <sub>25</sub> ClO <sub>4</sub>                               |
| Osetamivir          | Antiviral                 | 196618-13-0 | Y    | C <sub>16</sub> H <sub>28</sub> N <sub>2</sub> O <sub>4</sub>                  |
| Osemozotan          | Anxiolytic                | 137275-81-1 |      | C <sub>19</sub> H <sub>21</sub> NO <sub>5</sub>                                |
| Osmadizone          | Analgesic                 | 27450-21-1  |      | C <sub>23</sub> H <sub>22</sub> N <sub>2</sub> O <sub>4</sub> S                |
| Ospemifene          | Antineoplastic            | 128607-22-7 | Y    | C <sub>24</sub> H <sub>23</sub> ClO <sub>2</sub>                               |
| Ostreogrycin        | Antibiotic                | 21411-53-0  |      | C <sub>28</sub> H <sub>35</sub> N <sub>3</sub> O <sub>7</sub>                  |
| Osutidine           | Antilucerative            | 140695-21-2 |      | C <sub>19</sub> H <sub>28</sub> N <sub>4</sub> O <sub>5</sub> S <sub>2</sub>   |
| Otamixaban          | Anticoagulant             | 193153-04-7 |      | C <sub>25</sub> H <sub>26</sub> N <sub>4</sub> O <sub>4</sub>                  |
| Otenzepad           | Mydriatic                 | 102394-31-0 |      | C <sub>24</sub> H <sub>31</sub> N <sub>5</sub> O <sub>2</sub>                  |
| Oteracil            | Antineoplastic            | 937-13-3    |      | C <sub>4</sub> H <sub>3</sub> N <sub>3</sub> O <sub>4</sub>                    |
| Otilonium Bromide   | Antispasmodic             | 26095-59-0  | Y    | C <sub>29</sub> H <sub>43</sub> BrN <sub>2</sub> O <sub>4</sub>                |
| Ouabain             | Cardiotonic               | 630-60-4    |      | C <sub>29</sub> H <sub>44</sub> O <sub>12</sub>                                |
| Oxabolone Cipionate | Steroid                   | 1254-35-9   |      | C <sub>26</sub> H <sub>38</sub> O <sub>4</sub>                                 |
| Oxabrexine          | Antidepressant            | 65415-42-1  |      | C <sub>18</sub> H <sub>25</sub> Br <sub>2</sub> NO <sub>3</sub>                |
| Oxaceprol           | Antiinflammatory          | 33996-33-7  |      | C <sub>7</sub> H <sub>11</sub> NO <sub>4</sub>                                 |
| Oxacillin           | Antibiotic                | 66-79-5     |      | C <sub>19</sub> H <sub>19</sub> N <sub>3</sub> O <sub>5</sub> S                |
| Oxadimidine         | Antineoplastic            | 16485-05-5  |      | C <sub>18</sub> H <sub>21</sub> N <sub>3</sub> O                               |
| Oxaflozane          | Antidepressant            | 26629-87-8  |      | C <sub>14</sub> H <sub>18</sub> F <sub>3</sub> NO                              |
| Oxaflumazine        | Antipsychotic             | 16498-21-8  |      | C <sub>26</sub> H <sub>32</sub> F <sub>3</sub> N <sub>3</sub> O <sub>2</sub> S |
| Oxagrelate          | Antithrombotic            | 56611-65-5  |      | C <sub>14</sub> H <sub>16</sub> N <sub>2</sub> O <sub>4</sub>                  |
| Oxalic Acid         | Hemostatic                | 144-62-7    |      | C <sub>2</sub> H <sub>2</sub> O <sub>4</sub>                                   |
| Oxalinast           | Bronchodilator            | 70009-66-4  |      | C <sub>14</sub> H <sub>13</sub> NO <sub>4</sub>                                |
| Oxamarin            | Hemostatic                | 15301-80-1  |      | C <sub>22</sub> H <sub>34</sub> N <sub>2</sub> O <sub>4</sub>                  |
| Oxametacin          | Antiinflammatory          | 27035-30-9  |      | C <sub>19</sub> H <sub>17</sub> ClN <sub>2</sub> O <sub>4</sub>                |
| Oxamisole           | Immunomodulator           | 99258-56-7  |      | C <sub>15</sub> H <sub>20</sub> N <sub>2</sub> O <sub>2</sub>                  |
| Oxamniquine         | Anthelminthic             | 21738-42-1  | Y    | C <sub>14</sub> H <sub>21</sub> N <sub>3</sub> O <sub>3</sub>                  |
| Oxanamide           | Anxiolytic                | 126-93-2    |      | C <sub>8</sub> H <sub>15</sub> NO <sub>2</sub>                                 |
| Oxandrolone         | Androgen                  | 53-39-4     | Y    | C <sub>19</sub> H <sub>30</sub> O <sub>3</sub>                                 |
| Oxantel             | Anthelminthic             | 36531-26-7  | Y    | C <sub>13</sub> H <sub>16</sub> N <sub>2</sub> O                               |
| Oxapadol            | Analgesic                 | 56969-22-3  |      | C <sub>18</sub> H <sub>16</sub> N <sub>2</sub> O <sub>2</sub>                  |
| Oxapium Iodide      | Antispasmodic             | 6577-41-9   |      | C <sub>22</sub> H <sub>34</sub> INO <sub>2</sub>                               |
| Oxapropanium Iodide | Cholinergic               | 541-66-2    |      | C <sub>7</sub> H <sub>16</sub> INO <sub>2</sub>                                |
| Oxaprotiline        | Antidepressant            | 56433-44-4  |      | C <sub>20</sub> H <sub>23</sub> NO                                             |
| Oxaprozin           | Antiinflammatory          | 21256-18-8  |      | C <sub>18</sub> H <sub>15</sub> NO <sub>3</sub>                                |
| Oxarbazole          | Bronchodilator            | 35578-20-2  |      | C <sub>21</sub> H <sub>19</sub> NO <sub>4</sub>                                |
| Oxatomide           | Antihistaminic            | 60607-34-3  | Y    | C <sub>27</sub> H <sub>30</sub> N <sub>4</sub> O                               |
| Oxazafone           | Sedative                  | 70541-17-2  |      | C <sub>19</sub> H <sub>21</sub> ClN <sub>2</sub> O <sub>3</sub>                |
| Oxazepam            | Anxiolytic                | 604-75-1    | Y    | C <sub>15</sub> H <sub>11</sub> ClN <sub>2</sub> O <sub>2</sub>                |
| Oxazidione          | Analgesic                 | 27591-42-0  |      | C <sub>20</sub> H <sub>19</sub> NO <sub>3</sub>                                |
| Oxazolam            | Anxiolytic                | 24143-17-7  |      | C <sub>18</sub> H <sub>17</sub> ClN <sub>2</sub> O <sub>2</sub>                |
| Oxazorone           | Unclassified              | 25392-50-1  |      | C <sub>14</sub> H <sub>15</sub> NO <sub>4</sub>                                |
| Oxcarbazepine       | Anticonvulsant            | 28721-07-5  | Y    | C <sub>15</sub> H <sub>12</sub> N <sub>2</sub> O <sub>2</sub>                  |
| Oxdralazine         | Diuretic                  | 17259-75-5  |      | C <sub>8</sub> H <sub>15</sub> N <sub>5</sub> O <sub>2</sub>                   |
| Oxedrine            | Antihypotensive           | 94-07-5     |      | C <sub>9</sub> H <sub>13</sub> NO <sub>2</sub>                                 |
| Oxeglitazar         | Antidiabetic              | 280585-34-4 |      | C <sub>19</sub> H <sub>22</sub> O <sub>4</sub>                                 |
| Oxeladin            | Antitussive               | 468-61-1    |      | C <sub>20</sub> H <sub>33</sub> NO <sub>3</sub>                                |
| Oxendolone          | Steroid                   | 33765-68-3  |      | C <sub>20</sub> H <sub>30</sub> O <sub>2</sub>                                 |
| Oxepinac            | Antiinflammatory          | 55689-65-1  |      | C <sub>16</sub> H <sub>12</sub> O <sub>4</sub>                                 |
| Oxetacillin         | Antibiotic                | 53861-02-2  |      | C <sub>19</sub> H <sub>23</sub> N <sub>3</sub> O <sub>5</sub> S                |
| Oxethazaine         | Anesthetic                | 126-27-2    |      | C <sub>28</sub> H <sub>41</sub> N <sub>3</sub> O <sub>3</sub>                  |
| Oxetorone           | Analgesic                 | 26020-55-3  |      | C <sub>21</sub> H <sub>21</sub> NO <sub>2</sub>                                |
| Oxfendazole         | Anthelminthic             | 53716-50-0  |      | C <sub>15</sub> H <sub>13</sub> N <sub>3</sub> O <sub>3</sub> S                |
| Oxfenicine          | Vasodilator               | 32462-30-9  |      | C <sub>8</sub> H <sub>9</sub> NO <sub>3</sub>                                  |
| Oxibendazole        | Anthelminthic             | 20559-55-1  |      | C <sub>12</sub> H <sub>15</sub> N <sub>3</sub> O <sub>3</sub>                  |
| Oxibetaine          | Antibacterial             | 7002-65-5   |      | C <sub>6</sub> H <sub>13</sub> NO <sub>3</sub>                                 |
| Oxiconazole         | Antifungal                | 64211-45-6  |      | C <sub>18</sub> H <sub>13</sub> Cl <sub>4</sub> N <sub>3</sub> O               |
| Oxidopamine         | Ophthalmic                | 1199-18-4   |      | C <sub>8</sub> H <sub>11</sub> NO <sub>3</sub>                                 |
| Oxidronic Acid      | Bone Resorption Inhibitor | 15468-10-7  |      | CH <sub>6</sub> O <sub>7</sub> P <sub>2</sub>                                  |
| Oxifentorex         | Anorexic                  | 4075-88-1   |      | C <sub>17</sub> H <sub>21</sub> NO                                             |

Table S1. Cont.

| Common Name               | Indication         | CAS Number  | Oral | Molecular Formula                                                             |
|---------------------------|--------------------|-------------|------|-------------------------------------------------------------------------------|
| Oxifungin                 | Antifungal         | 64057-48-3  |      | C <sub>13</sub> H <sub>12</sub> N <sub>4</sub> O                              |
| Oxiglutatione             | Unclassified       | 27025-41-8  |      | C <sub>20</sub> H <sub>32</sub> N <sub>6</sub> O <sub>12</sub> S <sub>2</sub> |
| Oxilofrine                | Mydriatic          | 365-26-4    |      | C <sub>10</sub> H <sub>15</sub> NO <sub>2</sub>                               |
| Oxilorphan                | Antidote           | 42281-59-4  |      | C <sub>20</sub> H <sub>27</sub> NO <sub>2</sub>                               |
| Oximonam                  | Antibacterial      | 90898-90-1  |      | C <sub>12</sub> H <sub>15</sub> N <sub>5</sub> O <sub>6</sub> S               |
| Oxindanac                 | Antiinflammatory   | 68548-99-2  |      | C <sub>17</sub> H <sub>14</sub> O <sub>4</sub>                                |
| Oxiniac Acid              | Antihyperlipidemic | 2398-81-4   |      | C <sub>6</sub> H <sub>5</sub> NO <sub>3</sub>                                 |
| Oxiperomide               | Antipsychotic      | 5322-53-2   |      | C <sub>20</sub> H <sub>23</sub> N <sub>3</sub> O <sub>2</sub>                 |
| Oxiracetam                | Nootropic          | 62613-82-5  | Y    | C <sub>6</sub> H <sub>10</sub> N <sub>2</sub> O <sub>3</sub>                  |
| Oxiramide                 | Antiarrhythmic     | 13958-40-2  |      | C <sub>25</sub> H <sub>34</sub> N <sub>2</sub> O <sub>2</sub>                 |
| Oxisopred                 | Unclassified       | 18118-80-4  |      | C <sub>21</sub> H <sub>28</sub> O <sub>6</sub>                                |
| Oxisuran                  | Antineoplastic     | 27302-90-5  |      | C <sub>8</sub> H <sub>9</sub> NO <sub>2</sub> S                               |
| Oxitefonium Bromide       | Antispasmodic      | 17692-63-6  |      | C <sub>19</sub> H <sub>26</sub> BrNO <sub>3</sub> S                           |
| Oxitriptan                | Anticonvulsant     | 4350-09-8   |      | C <sub>11</sub> H <sub>12</sub> N <sub>2</sub> O <sub>3</sub>                 |
| Oxitriptyline             | Antidepressant     | 29541-85-3  |      | C <sub>19</sub> H <sub>21</sub> NO <sub>2</sub>                               |
| Oxitropium Bromide        | Bronchodilator     | 30286-75-0  |      | C <sub>19</sub> H <sub>26</sub> BrNO <sub>4</sub>                             |
| Oxmetidine                | Antiulcerative     | 72830-39-8  |      | C <sub>19</sub> H <sub>21</sub> N <sub>5</sub> O <sub>3</sub> S               |
| Oxodipine                 | Antianginal        | 90729-41-2  |      | C <sub>19</sub> H <sub>21</sub> NO <sub>6</sub>                               |
| Oxogestone Phenpropionate | Progestogen        | 16915-80-3  |      | C <sub>29</sub> H <sub>38</sub> O <sub>3</sub>                                |
| Oxolamine                 | Antiinflammatory   | 959-14-8    |      | C <sub>14</sub> H <sub>19</sub> N <sub>3</sub> O                              |
| Oxolinic Acid             | Antibiotic         | 14698-29-4  |      | C <sub>13</sub> H <sub>11</sub> NO <sub>5</sub>                               |
| Oxomemazine               | Antihistaminic     | 3689-50-7   |      | C <sub>18</sub> H <sub>22</sub> N <sub>2</sub> O <sub>2</sub> S               |
| Oxonazine                 | Antimigraine       | 5580-22-3   |      | C <sub>9</sub> H <sub>14</sub> N <sub>6</sub> O                               |
| Oxophenarsine             | Antiprotozoal      | 306-12-7    |      | C <sub>6</sub> H <sub>6</sub> AsNO <sub>2</sub>                               |
| Oxoprostol                | Antiulcerative     | 69648-40-4  |      | C <sub>22</sub> H <sub>32</sub> O <sub>4</sub>                                |
| Oxpheneridine             | Analgesic          | 546-32-7    |      | C <sub>22</sub> H <sub>27</sub> NO <sub>3</sub>                               |
| Oxprenoate Potassium      | Antihypertensive   | 786592-95-8 |      | C <sub>25</sub> H <sub>38</sub> O <sub>4</sub>                                |
| Oxprenolol                | Antihypertensive   | 6452-71-7   | Y    | C <sub>15</sub> H <sub>23</sub> NO <sub>3</sub>                               |
| Oxtriphylline             | Bronchodilator     | 4499-40-5   |      | C <sub>12</sub> H <sub>21</sub> N <sub>5</sub> O <sub>3</sub>                 |
| Oxybenzone                | Dermatologic       | 131-57-7    |      | C <sub>14</sub> H <sub>12</sub> O <sub>3</sub>                                |
| Oxybutynin                | Urologic           | 5633-20-5   | Y    | C <sub>22</sub> H <sub>31</sub> NO <sub>3</sub>                               |
| Oxycinchophen             | Uricosuric         | 485-89-2    |      | C <sub>16</sub> H <sub>11</sub> NO <sub>3</sub>                               |
| Oxyclozanide              | Anthelmintic       | 2277-92-1   |      | C <sub>13</sub> H <sub>6</sub> Cl <sub>5</sub> NO <sub>3</sub>                |
| Oxycodone                 | Analgesic          | 76-42-6     | Y    | C <sub>18</sub> H <sub>21</sub> NO <sub>4</sub>                               |
| Oxydipentonium Chloride   | Muscle Relaxant    | 7174-23-4   |      | C <sub>16</sub> H <sub>38</sub> N <sub>2</sub> OCl <sub>2</sub>               |
| Oxyfedrine                | Cardiotonic        | 15687-41-9  |      | C <sub>19</sub> H <sub>23</sub> NO <sub>3</sub>                               |
| Oxymesterone              | Steroid            | 145-12-0    |      | C <sub>20</sub> H <sub>30</sub> O <sub>3</sub>                                |
| Oxymetazoline             | Decongestant       | 1491-59-4   |      | C <sub>16</sub> H <sub>24</sub> N <sub>2</sub> O                              |
| Oxymetholone              | Androgen           | 434-07-1    | Y    | C <sub>21</sub> H <sub>32</sub> O <sub>3</sub>                                |
| Oxymorphone               | Analgesic          | 76-41-5     |      | C <sub>17</sub> H <sub>19</sub> NO <sub>4</sub>                               |
| Oxypendyl                 | Antiemetic         | 5585-93-3   |      | C <sub>20</sub> H <sub>26</sub> N <sub>4</sub> OS                             |
| Oxypertine                | Antidepressant     | 153-87-7    |      | C <sub>23</sub> H <sub>29</sub> N <sub>3</sub> O <sub>2</sub>                 |
| Oxyphenbutazone           | Antiinflammatory   | 129-20-4    |      | C <sub>19</sub> H <sub>20</sub> N <sub>2</sub> O <sub>3</sub>                 |
| Oxyphenyclimine           | Antispasmodic      | 125-53-1    |      | C <sub>20</sub> H <sub>28</sub> N <sub>2</sub> O <sub>3</sub>                 |
| Oxyphenisatin             | Laxative           | 125-13-3    |      | C <sub>20</sub> H <sub>15</sub> NO <sub>3</sub>                               |
| Oxyphenonium              | Antispasmodic      | 14214-84-7  |      | C <sub>21</sub> H <sub>34</sub> NO <sub>3</sub>                               |
| Oxypurinol                | Antiurolithic      | 2465-59-0   |      | C <sub>5</sub> H <sub>4</sub> N <sub>4</sub> O <sub>2</sub>                   |
| Oxyridazine               | Antipsychotic      | 14759-04-7  |      | C <sub>21</sub> H <sub>26</sub> N <sub>2</sub> OS                             |
| Oxysonium Iodide          | Antibacterial      | 3569-58-2   |      | C <sub>18</sub> H <sub>27</sub> O <sub>3</sub> S.I                            |
| Oxytetracycline           | Antibiotic         | 79-57-2     | Y    | C <sub>22</sub> H <sub>24</sub> N <sub>2</sub> O <sub>9</sub>                 |
| Ozagrel                   | Antianginal        | 82571-53-7  | Y    | C <sub>13</sub> H <sub>12</sub> N <sub>2</sub> O <sub>2</sub>                 |
| Ozolinone                 | Diuretic           | 56784-39-5  |      | C <sub>11</sub> H <sub>16</sub> N <sub>2</sub> O <sub>3</sub> S               |
| Paclitaxel                | Antineoplastic     | 33069-62-4  | Y    | C <sub>47</sub> H <sub>51</sub> NO <sub>14</sub>                              |
| Paclitaxel Ceribate       | Antineoplastic     | 186040-50-6 |      | C <sub>51</sub> H <sub>57</sub> NO <sub>18</sub>                              |
| Pacrinolol                | Antihypertensive   | 65655-59-6  |      | C <sub>23</sub> H <sub>28</sub> N <sub>2</sub> O <sub>4</sub>                 |
| Pactimibe                 | Antihyperlipidemic | 189198-30-9 |      | C <sub>25</sub> H <sub>40</sub> N <sub>2</sub> O <sub>3</sub>                 |
| Padimate A                | Dermatologic       | 21245-01-2  |      | C <sub>14</sub> H <sub>21</sub> NO <sub>2</sub>                               |
| Padimate O                | Dermatologic       | 21245-02-3  |      | C <sub>17</sub> H <sub>27</sub> NO <sub>2</sub>                               |
| Pafenolol                 | Antihypertensive   | 75949-61-0  |      | C <sub>18</sub> H <sub>31</sub> N <sub>3</sub> O <sub>3</sub>                 |
| Pagoclone                 | Anxiolytic         | 133737-32-3 | Y    | C <sub>23</sub> H <sub>22</sub> ClN <sub>3</sub> O <sub>2</sub>               |
| Palatrigine               | Anticonvulsant     | 98410-36-7  |      | C <sub>12</sub> H <sub>13</sub> Cl <sub>2</sub> N <sub>5</sub>                |
| Palinavir                 | Antiviral          | 154612-39-2 |      | C <sub>41</sub> H <sub>52</sub> N <sub>6</sub> O <sub>5</sub>                 |
| Paliperidone              | Antipsychotic      | 144598-75-4 | Y    | C <sub>23</sub> H <sub>27</sub> FN <sub>4</sub> O <sub>3</sub>                |

Table S1. Cont.

| Common Name            | Indication                   | CAS Number  | Oral | Molecular Formula                                                               |
|------------------------|------------------------------|-------------|------|---------------------------------------------------------------------------------|
| Paliperidone Palmitate | Antipsychotic                | 199739-10-1 | Y    | C <sub>39</sub> H <sub>57</sub> FN <sub>4</sub> O <sub>4</sub>                  |
| Palipiroden            | Nootropic                    | 188396-77-2 |      | C <sub>26</sub> H <sub>24</sub> F <sub>3</sub> N                                |
| Palmidrol              | Oxytocic                     | 544-31-0    |      | C <sub>18</sub> H <sub>37</sub> NO <sub>2</sub>                                 |
| Palonidipine           | Antianginal                  | 96515-73-0  |      | C <sub>29</sub> H <sub>34</sub> FN <sub>3</sub> O <sub>6</sub>                  |
| Palonosetron           | Antiemetic                   | 135729-61-2 |      | C <sub>19</sub> H <sub>24</sub> N <sub>2</sub> O                                |
| Palosuran              | Antineoplastic               | 540769-28-6 |      | C <sub>25</sub> H <sub>30</sub> N <sub>4</sub> O <sub>2</sub>                   |
| Pamabrom               | Diuretic                     | 10381-75-6  |      | C <sub>7</sub> H <sub>7</sub> BrN <sub>4</sub> O <sub>2</sub>                   |
| Pamaqueside            | Antihyperlipidemic           | 150332-35-7 |      | C <sub>39</sub> H <sub>62</sub> O <sub>14</sub>                                 |
| Pamaquine              | Antimalarial                 | 491-92-9    |      | C <sub>19</sub> H <sub>29</sub> N <sub>3</sub> O                                |
| Pamatolol Sulfate      | Antihypertensive             | 59110-35-9  |      | C <sub>16</sub> H <sub>26</sub> N <sub>2</sub> O <sub>4</sub>                   |
| Pamicogrel             | Antiinflammatory             | 101001-34-7 |      | C <sub>25</sub> H <sub>24</sub> N <sub>2</sub> O <sub>4</sub> S                 |
| Pamidronic Acid        | Bone Resorption Inhibitor    | 40391-99-9  |      | C <sub>3</sub> H <sub>11</sub> NO <sub>7</sub> P <sub>2</sub>                   |
| Panadiplon             | Anxiolytic                   | 124423-84-3 |      | C <sub>18</sub> H <sub>17</sub> N <sub>5</sub> O <sub>2</sub>                   |
| Panamesine             | Antipsychotic                | 139225-22-2 |      | C <sub>23</sub> H <sub>26</sub> N <sub>2</sub> O <sub>6</sub>                   |
| Pancopride             | Antiemetic                   | 121650-80-4 |      | C <sub>18</sub> H <sub>24</sub> ClN <sub>3</sub> O <sub>2</sub>                 |
| Pancuronium            | Neuromuscular Blocking Agent | 15500-66-0  |      | C <sub>35</sub> H <sub>60</sub> Br <sub>2</sub> N <sub>2</sub> O <sub>4</sub>   |
| Panidazole             | Antiprotozoal                | 13752-33-5  |      | C <sub>11</sub> H <sub>12</sub> N <sub>4</sub> O <sub>2</sub>                   |
| Panipenem              | Antibiotic                   | 87726-17-8  |      | C <sub>15</sub> H <sub>21</sub> N <sub>3</sub> O <sub>4</sub> S                 |
| Panomifene             | Steroid                      | 77599-17-8  |      | C <sub>25</sub> H <sub>24</sub> F <sub>3</sub> NO <sub>2</sub>                  |
| Pantethine             | Antihyperlipidemic           | 16816-67-4  |      | C <sub>22</sub> H <sub>42</sub> N <sub>4</sub> O <sub>8</sub> S <sub>2</sub>    |
| Pantoprazole           | Ant ulcerative               | 102625-70-7 | Y    | C <sub>16</sub> H <sub>15</sub> F <sub>2</sub> N <sub>3</sub> O <sub>4</sub> S  |
| Panuramine             | Antidepressant               | 80349-58-2  |      | C <sub>24</sub> H <sub>25</sub> N <sub>3</sub> O <sub>2</sub>                   |
| Papaverine             | Vasodilator                  | 58-74-2     | Y    | C <sub>20</sub> H <sub>21</sub> NO <sub>4</sub>                                 |
| Papaveroline           | Muscle Relaxant              | 574-77-6    |      | C <sub>16</sub> H <sub>13</sub> NO <sub>4</sub>                                 |
| Paraflutizide          | Diuretic                     | 1580-83-2   |      | C <sub>14</sub> H <sub>13</sub> ClFN <sub>3</sub> O <sub>4</sub> S <sub>2</sub> |
| Paraldehyde            | Sedative                     | 123-63-7    |      | C <sub>6</sub> H <sub>12</sub> O <sub>3</sub>                                   |
| Paramethadione         | Anticonvulsant               | 115-67-3    |      | C <sub>7</sub> H <sub>11</sub> NO <sub>3</sub>                                  |
| Paramethasone Acetate  | Glucocorticoid               | 1597-82-6   |      | C <sub>24</sub> H <sub>31</sub> FO <sub>6</sub>                                 |
| Paranyline             | Antiinflammatory             | 1729-61-9   |      | C <sub>21</sub> H <sub>16</sub> N <sub>2</sub>                                  |
| Parapenzolate Bromide  | Mydriatic                    | 5634-41-3   |      | C <sub>21</sub> H <sub>26</sub> NO <sub>3</sub> Br                              |
| Parapropamol           | Unclassified                 | 1693-37-4   |      | C <sub>9</sub> H <sub>11</sub> NO <sub>2</sub>                                  |
| Pararosaniline Pamoate | Anthelminthic                | 479-73-2    |      | C <sub>19</sub> H <sub>17</sub> N <sub>3</sub>                                  |
| Paraxazone             | Antidepressant               | 26513-79-1  |      | C <sub>10</sub> H <sub>10</sub> N <sub>2</sub> O <sub>3</sub>                   |
| Parbendazole           | Anthelminthic                | 14255-87-9  |      | C <sub>13</sub> H <sub>17</sub> N <sub>3</sub> O <sub>2</sub>                   |
| Parcetasal             | Unclassified                 | 87549-36-8  |      | C <sub>17</sub> H <sub>15</sub> NO <sub>5</sub>                                 |
| Parconazole            | Antifungal                   | 68685-54-1  |      | C <sub>17</sub> H <sub>16</sub> Cl <sub>2</sub> N <sub>2</sub> O <sub>3</sub>   |
| Parecoxib              | Antiinflammatory             | 198470-84-7 |      | C <sub>19</sub> H <sub>18</sub> N <sub>2</sub> O <sub>4</sub> S                 |
| Pareptide Sulfate      | Antiparkinsonian             | 61484-38-6  |      | C <sub>14</sub> H <sub>26</sub> N <sub>4</sub> O <sub>3</sub>                   |
| Parethoxycaine         | Analgesic                    | 94-23-5     |      | C <sub>15</sub> H <sub>23</sub> NO <sub>3</sub>                                 |
| Pargeverine            | Antispasmodic                | 13479-13-5  |      | C <sub>21</sub> H <sub>23</sub> NO <sub>3</sub>                                 |
| Pargolol               | Antianginal                  | 47082-97-3  |      | C <sub>16</sub> H <sub>23</sub> NO <sub>3</sub>                                 |
| Pargyline              | Antihypertensive             | 555-57-7    |      | C <sub>11</sub> H <sub>13</sub> N                                               |
| Paricalcitol           | Pituitary                    | 131918-61-1 |      | C <sub>27</sub> H <sub>44</sub> O <sub>3</sub>                                  |
| Paridocaine            | Analgesic                    | 7162-37-0   |      | C <sub>17</sub> H <sub>26</sub> N <sub>2</sub> O <sub>2</sub>                   |
| Parodilol              | Antihypertensive             | 113854-64-1 |      | C <sub>23</sub> H <sub>27</sub> N <sub>3</sub> O <sub>2</sub>                   |
| Paromomycin            | Antibiotic                   | 7542-37-2   |      | C <sub>23</sub> H <sub>45</sub> N <sub>5</sub> O <sub>14</sub>                  |
| Paroxetine             | Antidepressant               | 61869-08-7  | Y    | C <sub>19</sub> H <sub>20</sub> FNO <sub>3</sub>                                |
| Paroxypropione         | Antispasmodic                | 70-70-2     |      | C <sub>9</sub> H <sub>10</sub> O <sub>2</sub>                                   |
| Parsalmide             | Antifungal                   | 30653-83-9  |      | C <sub>14</sub> H <sub>18</sub> N <sub>2</sub> O <sub>2</sub>                   |
| Parvaquone             | Antiamoebic                  | 4042-30-2   |      | C <sub>16</sub> H <sub>16</sub> O <sub>3</sub>                                  |
| Pasiniazid             | Antibacterial                | 65-49-6     |      | C <sub>7</sub> H <sub>7</sub> NO <sub>3</sub>                                   |
| Patamostat             | Antiviral                    | 114568-26-2 |      | C <sub>20</sub> H <sub>20</sub> N <sub>4</sub> O <sub>4</sub> S                 |
| Patupilone             | Antineoplastic               | 152044-54-7 |      | C <sub>27</sub> H <sub>41</sub> NO <sub>6</sub> S                               |
| Pavatrin               | Muscle Relaxant              | 4425-78-9   |      | C <sub>20</sub> H <sub>23</sub> NO <sub>2</sub>                                 |
| Pavatrine              | Muscle Relaxant              | 4425-78-9   |      | C <sub>20</sub> H <sub>23</sub> NO <sub>2</sub>                                 |
| Paxamate               | Antihistaminic               | 5579-05-5   |      | C <sub>14</sub> H <sub>13</sub> NO <sub>2</sub>                                 |
| Pazelliptine           | Antineoplastic               | 65222-35-7  |      | C <sub>22</sub> H <sub>27</sub> N <sub>5</sub>                                  |
| Pazinaclone            | Anxiolytic                   | 103255-66-9 |      | C <sub>25</sub> H <sub>23</sub> ClN <sub>4</sub> O <sub>4</sub>                 |
| Pazopanib              | Antineoplastic               | 444731-52-6 | Y    | C <sub>21</sub> H <sub>23</sub> N <sub>7</sub> O <sub>2</sub> S                 |
| Pazoxide               | Antihypertensive             | 21132-59-2  |      | C <sub>12</sub> H <sub>10</sub> Cl <sub>2</sub> N <sub>2</sub> O <sub>2</sub> S |
| Pazufloxacin           | Antibiotic                   | 127045-41-4 |      | C <sub>16</sub> H <sub>15</sub> FN <sub>2</sub> O <sub>4</sub>                  |
| Pecilocin              | Antibiotic                   | 19504-77-9  |      | C <sub>17</sub> H <sub>25</sub> NO <sub>3</sub>                                 |

Table S1. Cont.

| Common Name                  | Indication       | CAS Number  | Oral | Molecular Formula                                                                           |
|------------------------------|------------------|-------------|------|---------------------------------------------------------------------------------------------|
| Pecocycline                  | Antibiotic       | 15301-82-3  |      | C <sub>29</sub> H <sub>35</sub> N <sub>3</sub> O <sub>10</sub>                              |
| Pefloxacin                   | Antibacterial    | 70458-92-3  | Y    | C <sub>17</sub> H <sub>20</sub> FN <sub>3</sub> O <sub>3</sub>                              |
| Pegamotecan                  | Antineoplastic   | 203066-49-3 |      | C <sub>52</sub> H <sub>48</sub> N <sub>6</sub> O <sub>14</sub>                              |
| Pelanserlin                  | Antihypertensive | 2208-51-7   |      | C <sub>21</sub> H <sub>24</sub> N <sub>4</sub> O <sub>2</sub>                               |
| Pelargonic Acid              | Unclassified     | 112-05-0    |      | C <sub>9</sub> H <sub>18</sub> O <sub>2</sub>                                               |
| Peldesine                    | Antineoplastic   | 133432-71-0 |      | C <sub>12</sub> H <sub>11</sub> N <sub>5</sub> O                                            |
| Peliglitazar                 | Antidiabetic     | 331744-64-0 |      | C <sub>30</sub> H <sub>30</sub> N <sub>2</sub> O <sub>7</sub>                               |
| Pelitinib                    | Antineoplastic   | 257933-82-7 |      | C <sub>24</sub> H <sub>23</sub> ClFN <sub>5</sub> O <sub>2</sub>                            |
| Pelitrexol                   | Antineoplastic   | 446022-33-9 |      | C <sub>20</sub> H <sub>25</sub> N <sub>5</sub> O <sub>6</sub> S                             |
| Pelretin                     | Dermatologic     | 91587-01-8  |      | C <sub>23</sub> H <sub>28</sub> O <sub>2</sub>                                              |
| Pelrinone                    | Cardiotonic      | 94386-65-9  |      | C <sub>12</sub> H <sub>11</sub> N <sub>5</sub> O                                            |
| Pelubiprofen                 | Analgesic        | 69956-77-0  | Y    | C <sub>16</sub> H <sub>18</sub> O <sub>3</sub>                                              |
| Pemaglitazar                 | Antidiabetic     | 496050-39-6 |      | C <sub>18</sub> H <sub>17</sub> F <sub>3</sub> O <sub>3</sub> S                             |
| Pemedolac                    | Analgesic        | 114716-16-4 |      | C <sub>22</sub> H <sub>23</sub> NO <sub>3</sub>                                             |
| Pemerid Nitrate              | Antitussive      | 50432-78-5  |      | C <sub>15</sub> H <sub>32</sub> N <sub>2</sub> O                                            |
| Pemetrexed                   | Antineoplastic   | 137281-23-3 |      | C <sub>20</sub> H <sub>21</sub> N <sub>5</sub> O <sub>6</sub>                               |
| Pemirolast                   | Antihistaminic   | 69372-19-6  | Y    | C <sub>10</sub> H <sub>8</sub> N <sub>6</sub> O                                             |
| Pemoline                     | Nootropic        | 2152-34-3   | Y    | C <sub>9</sub> H <sub>8</sub> N <sub>2</sub> O <sub>2</sub>                                 |
| Pempidine                    | Antihypertensive | 79-55-0     |      | C <sub>10</sub> H <sub>21</sub> N                                                           |
| Penamocillin                 | Antibacterial    | 983-85-7    |      | C <sub>19</sub> H <sub>22</sub> N <sub>2</sub> O <sub>6</sub> S                             |
| Penbutolol Sulfate           | Antianginal      | 38363-40-5  |      | C <sub>18</sub> H <sub>29</sub> NO <sub>2</sub>                                             |
| Penciclovir                  | Antiviral        | 39809-25-1  |      | C <sub>10</sub> H <sub>15</sub> N <sub>5</sub> O <sub>3</sub>                               |
| Penethamate Hydriodide       | Mydriatic        | 3689-73-4   |      | C <sub>22</sub> H <sub>31</sub> N <sub>3</sub> O <sub>4</sub> S                             |
| Penfluridol                  | Antipsychotic    | 26864-56-2  |      | C <sub>28</sub> H <sub>27</sub> ClF <sub>5</sub> NO                                         |
| Penflutizide                 | Diuretic         | 1766-91-2   |      | C <sub>13</sub> H <sub>18</sub> F <sub>3</sub> N <sub>3</sub> O <sub>4</sub> S <sub>2</sub> |
| Pengitoxin                   | Cardiotonic      | 242-04-8    |      | C <sub>51</sub> H <sub>74</sub> O <sub>19</sub>                                             |
| Penicillamine                | Antirheumatic    | 52-67-5     | Y    | C <sub>5</sub> H <sub>11</sub> NO <sub>2</sub> S                                            |
| Penicillin V                 | Antibiotic       | 87-08-1     |      | C <sub>16</sub> H <sub>18</sub> N <sub>2</sub> O <sub>5</sub> S                             |
| Penicillin X                 | Antibiotic       | 525-91-7    |      | C <sub>16</sub> H <sub>18</sub> N <sub>2</sub> O <sub>5</sub> S                             |
| Penimocycline                | Antibiotic       | 16259-34-0  |      | C <sub>39</sub> H <sub>43</sub> N <sub>5</sub> O <sub>12</sub> S                            |
| Penirolol                    | Antianginal      | 58503-83-6  |      | C <sub>15</sub> H <sub>22</sub> N <sub>2</sub> O <sub>2</sub>                               |
| Penoctonium Bromide          | Antibacterial    | 17088-72-1  |      | C <sub>26</sub> H <sub>50</sub> BrNO <sub>2</sub>                                           |
| Penprostene                  | Prostaglandin    | 61557-12-8  |      | C <sub>21</sub> H <sub>32</sub> O <sub>5</sub>                                              |
| Pentabamate                  | Anxiolytic       | 5667-70-9   |      | C <sub>8</sub> H <sub>16</sub> N <sub>2</sub> O <sub>4</sub>                                |
| Pentacynium Chloride         | Unclassified     | 77-12-3     |      | C <sub>27</sub> H <sub>39</sub> N <sub>3</sub> O <sub>2</sub> Cl                            |
| Pentaerythritol              | Sedative         | 115-77-5    |      | C <sub>5</sub> H <sub>12</sub> O <sub>4</sub>                                               |
| Pentaerythritol Tetranitrate | Vasodilator      | 78-11-5     |      | C <sub>5</sub> H <sub>8</sub> N <sub>4</sub> O <sub>12</sub>                                |
| Pentafluranol                | Steroid          | 65634-39-1  |      | C <sub>17</sub> H <sub>15</sub> F <sub>5</sub> O <sub>2</sub>                               |
| Pentagestrone                | Progestogen      | 7001-56-1   |      | C <sub>26</sub> H <sub>38</sub> O <sub>3</sub>                                              |
| Pentalamide                  | Antifungal       | 5579-06-6   |      | C <sub>12</sub> H <sub>17</sub> NO <sub>2</sub>                                             |
| Pentamethonium Bromide       | Antihypertensive | 541-20-8    |      | C <sub>11</sub> H <sub>28</sub> Br <sub>2</sub> N <sub>2</sub>                              |
| Pentamidine                  | Antiprotozoal    | 100-33-4    |      | C <sub>19</sub> H <sub>24</sub> N <sub>4</sub> O <sub>2</sub>                               |
| Pentamorphone                | Analgesic        | 68616-83-1  |      | C <sub>22</sub> H <sub>28</sub> N <sub>2</sub> O <sub>3</sub>                               |
| Pentamoxane                  | Sedative         | 4730-07-8   |      | C <sub>14</sub> H <sub>21</sub> NO <sub>2</sub>                                             |
| Pentamustine                 | Antineoplastic   | 73105-03-0  |      | C <sub>8</sub> H <sub>16</sub> ClN <sub>3</sub> O <sub>2</sub>                              |
| 1-Pentanol                   | Dermatologic     | 71-41-0     |      | C <sub>5</sub> H <sub>12</sub> O                                                            |
| Pentaphonate                 | Analgesic        | 24360-58-5  |      | C <sub>36</sub> H <sub>40</sub> Cl <sub>5</sub> OP                                          |
| Pentapiperide                | Antispasmodic    | 7009-54-3   |      | C <sub>18</sub> H <sub>27</sub> NO <sub>2</sub>                                             |
| Pentapiperium Methylsulfate  | Antispasmodic    | 7681-80-3   |      | C <sub>20</sub> H <sub>33</sub> NO <sub>6</sub> S                                           |
| Pentaquine Phosphate         | Antimalarial     | 86-78-2     |      | C <sub>18</sub> H <sub>27</sub> N <sub>3</sub> O                                            |
| Pentazocine                  | Analgesic        | 359-83-1    |      | C <sub>19</sub> H <sub>27</sub> NO                                                          |
| Penthienate                  | Mydriatic        | 22064-27-3  |      | C <sub>18</sub> H <sub>30</sub> NO <sub>3</sub> S                                           |
| Penthrichloral               | Sedative         | 5684-90-2   |      | C <sub>7</sub> H <sub>11</sub> Cl <sub>3</sub> O <sub>4</sub>                               |
| Pentiapine Maleate           | Antipsychotic    | 81382-51-6  |      | C <sub>15</sub> H <sub>17</sub> N <sub>5</sub> S                                            |
| Pentifylline                 | Vasodilator      | 1028-33-7   |      | C <sub>13</sub> H <sub>20</sub> N <sub>4</sub> O <sub>2</sub>                               |
| Pentigetide                  | Antihistaminic   | 62087-72-3  |      | C <sub>22</sub> H <sub>36</sub> N <sub>8</sub> O <sub>11</sub>                              |
| Pentisomicin                 | Antibiotic       | 55870-64-9  |      | C <sub>19</sub> H <sub>37</sub> N <sub>5</sub> O <sub>7</sub>                               |
| Pentisomide                  | Antiarrhythmic   | 78833-03-1  |      | C <sub>19</sub> H <sub>33</sub> N <sub>3</sub> O                                            |
| Pentizidone Sodium           | Antibacterial    | 55694-83-2  |      | C <sub>8</sub> H <sub>12</sub> N <sub>2</sub> O <sub>3</sub>                                |
| Pentobarbital                | Sedative         | 76-74-4     |      | C <sub>11</sub> H <sub>18</sub> N <sub>2</sub> O <sub>3</sub>                               |
| Pentolinium                  | Antihypertensive | 144-44-5    |      | C <sub>15</sub> H <sub>32</sub> N <sub>2</sub>                                              |
| Pentomone                    | Androgen         | 67102-87-8  |      | C <sub>24</sub> H <sub>26</sub> O <sub>5</sub>                                              |
| Pentopril                    | Antihypertensive | 82924-03-6  |      | C <sub>18</sub> H <sub>23</sub> NO <sub>5</sub>                                             |

Table S1. Cont.

| Common Name                   | Indication       | CAS Number  | Oral | Molecular Formula                                                              |
|-------------------------------|------------------|-------------|------|--------------------------------------------------------------------------------|
| Pentorex                      | Anorexic         | 434-43-5    |      | C <sub>11</sub> H <sub>17</sub> N                                              |
| Pentostatin                   | Antineoplastic   | 53910-25-1  |      | C <sub>11</sub> H <sub>16</sub> N <sub>4</sub> O <sub>4</sub>                  |
| Pentoxifylline                | Anticoagulant    | 6493-05-6   |      | C <sub>13</sub> H <sub>18</sub> N <sub>4</sub> O <sub>3</sub>                  |
| Pentritinol                   | Vasodilator      | 1607-17-6   |      | C <sub>5</sub> H <sub>9</sub> N <sub>3</sub> O <sub>10</sub>                   |
| Pentylentetrazol              | Nootropic        | 54-95-5     |      | C <sub>6</sub> H <sub>10</sub> N <sub>4</sub>                                  |
| Pepstatin                     | Unclassified     | 26305-03-3  |      | C <sub>34</sub> H <sub>63</sub> N <sub>5</sub> O <sub>9</sub>                  |
| Peradoxime                    | Analgesic        | 67254-81-3  |      | C <sub>22</sub> H <sub>29</sub> N <sub>3</sub> O <sub>4</sub>                  |
| Perafensine                   | Antiparkinsonian | 72444-62-3  |      | C <sub>19</sub> H <sub>19</sub> N <sub>3</sub>                                 |
| Peralopride                   | Antiemetic       | 57083-89-3  |      | C <sub>20</sub> H <sub>22</sub> ClN <sub>3</sub> O <sub>4</sub>                |
| Peramivir                     | Antiviral        | 330600-85-6 |      | C <sub>15</sub> H <sub>28</sub> N <sub>4</sub> O <sub>4</sub>                  |
| Peraquinsin                   | Antihypertensive | 35265-50-0  |      | C <sub>23</sub> H <sub>28</sub> N <sub>4</sub> O <sub>4</sub>                  |
| Perastine                     | Antineoplastic   | 4960-10-5   |      | C <sub>20</sub> H <sub>25</sub> NO                                             |
| Peratizole                    | Antiuro lithic   | 29952-13-4  |      | C <sub>17</sub> H <sub>26</sub> N <sub>4</sub> S <sub>2</sub>                  |
| Perazine                      | Antipsychotic    | 84-97-9     |      | C <sub>20</sub> H <sub>25</sub> N <sub>3</sub> S                               |
| Perbufylline                  | Bronchodilator   | 110390-84-6 |      | C <sub>23</sub> H <sub>28</sub> FN <sub>5</sub> O <sub>3</sub>                 |
| Perflisobutane                | Anesthetic       | 354-92-7    |      | C <sub>4</sub> F <sub>10</sub>                                                 |
| Perfluamine                   | Cardiotonic      | 338-83-0    |      | C <sub>9</sub> F <sub>21</sub> N                                               |
| Perflubrodec                  | Cardiotonic      | 307-43-7    |      | C <sub>10</sub> BrF <sub>21</sub>                                              |
| Perfomedil                    | Vasodilator      | 92268-40-1  |      | C <sub>19</sub> H <sub>29</sub> NO <sub>4</sub>                                |
| Perfosamide                   | Antineoplastic   | 62435-42-1  |      | C <sub>7</sub> H <sub>15</sub> Cl <sub>2</sub> N <sub>2</sub> O <sub>4</sub> P |
| Pergolide                     | Antiparkinsonian | 66104-22-1  | Y    | C <sub>19</sub> H <sub>26</sub> N <sub>2</sub> S                               |
| Perhexiline                   | Vasodilator      | 6621-47-2   | Y    | C <sub>19</sub> H <sub>35</sub> N                                              |
| Periciazine                   | Antipsychotic    | 2622-26-6   |      | C <sub>21</sub> H <sub>23</sub> N <sub>3</sub> OS                              |
| Perifosine                    | Antineoplastic   | 157716-52-4 |      | C <sub>25</sub> H <sub>52</sub> NO <sub>4</sub> P                              |
| Perimetazine                  | Antipsychotic    | 13093-88-4  |      | C <sub>22</sub> H <sub>28</sub> N <sub>2</sub> O <sub>2</sub> S                |
| Perindopril                   | Antihypertensive | 82834-16-0  | Y    | C <sub>19</sub> H <sub>32</sub> N <sub>2</sub> O <sub>5</sub>                  |
| Perindoprilat                 | Antihypertensive | 95153-31-4  |      | C <sub>17</sub> H <sub>28</sub> N <sub>2</sub> O <sub>5</sub>                  |
| Perisoxal                     | Antiinflammatory | 2055-44-9   |      | C <sub>16</sub> H <sub>20</sub> N <sub>2</sub> O <sub>2</sub>                  |
| Perlapine                     | Sedative         | 1977-11-3   |      | C <sub>19</sub> H <sub>21</sub> N <sub>3</sub>                                 |
| Permethrin                    | Dermatologic     | 52645-53-1  |      | C <sub>21</sub> H <sub>20</sub> Cl <sub>2</sub> O <sub>3</sub>                 |
| Perospirone                   | Antipsychotic    | 150915-41-6 | Y    | C <sub>23</sub> H <sub>30</sub> N <sub>4</sub> O <sub>2</sub> S                |
| Perphenazine                  | Antipsychotic    | 58-39-9     | Y    | C <sub>21</sub> H <sub>26</sub> ClN <sub>3</sub> OS                            |
| Persilic Acid                 | Unclassified     | 4444-23-9   |      | C <sub>6</sub> H <sub>6</sub> O <sub>8</sub> S <sub>2</sub>                    |
| Perzinfotel                   | Analgesic        | 144912-63-0 |      | C <sub>9</sub> H <sub>13</sub> N <sub>2</sub> O <sub>5</sub> P                 |
| Petrichloral                  | Sedative         | 78-12-6     |      | C <sub>13</sub> H <sub>16</sub> Cl <sub>12</sub> O <sub>8</sub>                |
| Pexantel                      | Anthelmintic     | 10001-13-5  |      | C <sub>12</sub> H <sub>22</sub> N <sub>2</sub> O                               |
| Phanquone                     | Antiamoebic      | 84-12-8     |      | C <sub>12</sub> H <sub>6</sub> N <sub>2</sub> O <sub>2</sub>                   |
| Phenacaine                    | Analgesic        | 101-93-9    |      | C <sub>18</sub> H <sub>22</sub> N <sub>2</sub> O <sub>2</sub>                  |
| Phenacemide                   | Anticonvulsant   | 63-98-9     |      | C <sub>9</sub> H <sub>10</sub> N <sub>2</sub> O <sub>2</sub>                   |
| Phenacetin                    | Analgesic        | 62-44-2     |      | C <sub>10</sub> H <sub>13</sub> NO <sub>2</sub>                                |
| Phenacridane Chloride         | Antibiotic       | 3131-8-6    |      | C <sub>26</sub> H <sub>28</sub> NOCl                                           |
| Phenactropinium Chloride      | Antihypertensive | 3784-89-2   |      | C <sub>24</sub> H <sub>28</sub> ClNO <sub>4</sub>                              |
| Phenadoxone                   | Analgesic        | 467-84-5    |      | C <sub>23</sub> H <sub>29</sub> NO <sub>2</sub>                                |
| Phenaglycodol                 | Sedative         | 79-93-6     |      | C <sub>11</sub> H <sub>15</sub> ClO <sub>2</sub>                               |
| Phenamazoline                 | Antibiotic       | 501-62-2    |      | C <sub>10</sub> H <sub>13</sub> N <sub>3</sub>                                 |
| Phenampramide                 | Analgesic        | 129-83-9    |      | C <sub>17</sub> H <sub>26</sub> N <sub>2</sub> O                               |
| Phenanthrene                  | Antineoplastic   | 85-01-8     |      | C <sub>14</sub> H <sub>10</sub>                                                |
| Phenaphthazine                | Analgesic        | 1716-22-9   |      | C <sub>16</sub> H <sub>10</sub> N <sub>4</sub> O <sub>11</sub> S <sub>2</sub>  |
| Phenarsones Sulfoxylate       | Antibiotic       | 497-97-2    |      | C <sub>7</sub> H <sub>10</sub> AsNO <sub>6</sub> S                             |
| Phenazocine Hydrobromide      | Analgesic        | 127-35-5    |      | C <sub>22</sub> H <sub>27</sub> NO                                             |
| Phenazopyridine               | Analgesic        | 94-78-0     | Y    | C <sub>11</sub> H <sub>11</sub> N <sub>5</sub>                                 |
| Phenbutazone Sodium Glycerate | Antiinflammatory | 798-21-0    |      | C <sub>19</sub> H <sub>20</sub> N <sub>2</sub> O <sub>2</sub>                  |
| Phencarbamide                 | Antispasmodic    | 3735-90-8   |      | C <sub>19</sub> H <sub>24</sub> N <sub>2</sub> O <sub>5</sub> S                |
| Phencyclidine                 | Anesthetic       | 77-10-1     |      | C <sub>17</sub> H <sub>25</sub> N                                              |
| Phendimetrazine               | Anorexic         | 634-03-7    | Y    | C <sub>12</sub> H <sub>17</sub> NO                                             |
| Phenelzine                    | Antidepressant   | 51-71-8     | Y    | C <sub>8</sub> H <sub>12</sub> N <sub>2</sub>                                  |
| Phenethicillin Potassium      | Antibiotic       | 147-55-7    | Y    | C <sub>17</sub> H <sub>20</sub> N <sub>2</sub> O <sub>5</sub> S                |
| Pheneturide                   | Anticonvulsant   | 90-49-3     |      | C <sub>11</sub> H <sub>14</sub> N <sub>2</sub> O <sub>2</sub>                  |
| Phenformin                    | Antidiabetic     | 114-86-3    |      | C <sub>10</sub> H <sub>15</sub> N <sub>5</sub>                                 |
| Phenglutarimide               | Antiparkinsonian | 1156-05-4   |      | C <sub>17</sub> H <sub>24</sub> N <sub>2</sub> O <sub>2</sub>                  |
| Phenicarbazide                | Antiinflammatory | 103-03-7    |      | C <sub>7</sub> H <sub>9</sub> N <sub>3</sub> O                                 |
| Phenindamine                  | Antihistaminic   | 82-88-2     |      | C <sub>19</sub> H <sub>19</sub> N                                              |
| Phenindione                   | Anticoagulant    | 83-12-5     |      | C <sub>15</sub> H <sub>10</sub> O <sub>2</sub>                                 |

Table S1. Cont.

| Common Name              | Indication            | CAS Number  | Oral | Molecular Formula                                                             |
|--------------------------|-----------------------|-------------|------|-------------------------------------------------------------------------------|
| Pheniprazine             | Antihypertensive      | 55-52-7     |      | C <sub>9</sub> H <sub>14</sub> N <sub>2</sub>                                 |
| Pheniramine              | Antihistaminic        | 86-21-5     |      | C <sub>16</sub> H <sub>20</sub> N <sub>2</sub>                                |
| Phenisonone Hydrobromide | Respiratory Stimulant | 715646-49-4 |      | C <sub>12</sub> H <sub>17</sub> NO <sub>3</sub>                               |
| Phenmetrazine            | Anorexic              | 134-49-6    |      | C <sub>11</sub> H <sub>15</sub> NO                                            |
| Phenobarbital            | Anticonvulsant        | 50-06-6     | Y    | C <sub>12</sub> H <sub>12</sub> N <sub>2</sub> O <sub>3</sub>                 |
| Phenol Camphorated       | Dermatologic          | 108-95-2    |      | C <sub>6</sub> H <sub>6</sub> O                                               |
| Phenolphthalein          | Laxative              | 77-09-8     |      | C <sub>20</sub> H <sub>14</sub> O <sub>4</sub>                                |
| Phenomorphane            | Analgesic             | 468-07-5    |      | C <sub>24</sub> H <sub>29</sub> NO                                            |
| Phenoperidine            | Analgesic             | 562-26-5    |      | C <sub>23</sub> H <sub>29</sub> NO <sub>3</sub>                               |
| Phenothiazine            | Anthelminthic         | 92-84-2     |      | C <sub>12</sub> H <sub>9</sub> NS                                             |
| Phenothrin               | Dermatologic          | 26002-80-2  |      | C <sub>23</sub> H <sub>26</sub> O <sub>3</sub>                                |
| Phenoxyacetic Acid       | Dermatologic          | 122-59-8    |      | C <sub>8</sub> H <sub>8</sub> O <sub>3</sub>                                  |
| Phenoxybenzamine         | Antihypertensive      | 59-96-1     | Y    | C <sub>18</sub> H <sub>22</sub> ClNO                                          |
| Phenoxypropazine         | Antidepressant        | 3818-37-9   |      | C <sub>9</sub> H <sub>14</sub> N <sub>2</sub> O                               |
| Phenprobamate            | Muscle Relaxant       | 673-31-4    |      | C <sub>10</sub> H <sub>13</sub> NO <sub>2</sub>                               |
| Phenprocoumon            | Anticoagulant         | 435-97-2    | Y    | C <sub>18</sub> H <sub>16</sub> O <sub>3</sub>                                |
| Phenpromethamine         | Adrenergic            | 93-88-9     |      | C <sub>10</sub> H <sub>15</sub> N                                             |
| Phensuximide             | Anticonvulsant        | 86-34-0     |      | C <sub>11</sub> H <sub>11</sub> NO <sub>2</sub>                               |
| Phentermine              | Anorexic              | 122-09-8    | Y    | C <sub>10</sub> H <sub>15</sub> N                                             |
| Phentolamine             | Antihypertensive      | 50-60-2     |      | C <sub>17</sub> H <sub>19</sub> N <sub>3</sub> O                              |
| Phenyl Aminosalicilate   | Antibacterial         | 133-11-9    |      | C <sub>13</sub> H <sub>11</sub> NO <sub>3</sub>                               |
| Phenyl Salicylate        | Analgesic             | 118-55-8    |      | C <sub>13</sub> H <sub>10</sub> O <sub>3</sub>                                |
| Phenylbutazone           | Antiinflammatory      | 50-33-9     |      | C <sub>19</sub> H <sub>20</sub> N <sub>2</sub> O <sub>2</sub>                 |
| Phenylephrine            | Mydriatic             | 59-42-7     |      | C <sub>9</sub> H <sub>13</sub> NO <sub>2</sub>                                |
| Phenylpropanolamine      | Decongestant          | 14838-15-4  |      | C <sub>9</sub> H <sub>13</sub> NO                                             |
| Phenylthilone            | Laxative              | 115-55-9    |      | C <sub>12</sub> H <sub>13</sub> NO <sub>2</sub> S                             |
| Phenylthioacetic Acid    | Antispasmodic         | 949-01-9    |      | C <sub>12</sub> H <sub>15</sub> NOS                                           |
| Phenyltoloxamine         | Antihistaminic        | 92-12-6     |      | C <sub>17</sub> H <sub>21</sub> NO                                            |
| Phenyrracillin           | Antibiotic            | 7463-81-2   |      | C <sub>16</sub> H <sub>18</sub> N <sub>2</sub>                                |
| Phenylramidol            | Analgesic             | 553-69-5    |      | C <sub>13</sub> H <sub>14</sub> N <sub>2</sub> O                              |
| Phenytoin                | Anticonvulsant        | 57-41-0     | Y    | C <sub>15</sub> H <sub>12</sub> N <sub>2</sub> O <sub>2</sub>                 |
| Phetharbital             | Sedative              | 357-67-5    |      | C <sub>14</sub> H <sub>16</sub> N <sub>2</sub> O <sub>3</sub>                 |
| Phethenylate Sodium      | Anticonvulsant        | 7772-37-4   |      | C <sub>13</sub> H <sub>10</sub> N <sub>2</sub> O <sub>2</sub> S               |
| Pholcodine               | Antitussive           | 509-67-1    |      | C <sub>23</sub> H <sub>30</sub> N <sub>2</sub> O <sub>4</sub>                 |
| Pholedrine               | Antihypotensive       | 370-14-9    |      | C <sub>10</sub> H <sub>15</sub> NO                                            |
| Phthalofyne              | Anthelminthic         | 131-67-9    |      | C <sub>14</sub> H <sub>14</sub> O <sub>4</sub>                                |
| Phthalylsulfacetamide    | Antibiotic            | 131-69-1    |      | C <sub>16</sub> H <sub>14</sub> N <sub>2</sub> O <sub>6</sub> S               |
| Phthalylsulfamethizole   | Antibiotic            | 485-24-5    |      | C <sub>17</sub> H <sub>14</sub> N <sub>4</sub> O <sub>5</sub> S <sub>2</sub>  |
| Phthalylsulfathiazole    | Antibiotic            | 85-73-4     |      | C <sub>17</sub> H <sub>13</sub> N <sub>3</sub> O <sub>5</sub> S <sub>2</sub>  |
| Physostigmine            | Cholinergic           | 57-47-6     |      | C <sub>15</sub> H <sub>21</sub> N <sub>3</sub> O <sub>2</sub>                 |
| Piberaline               | Antidepressant        | 39640-15-8  |      | C <sub>17</sub> H <sub>19</sub> N <sub>3</sub> O                              |
| Piboserod                | Gastroprokinetic      | 152811-62-6 |      | C <sub>22</sub> H <sub>31</sub> N <sub>3</sub> O <sub>2</sub>                 |
| Pibrozelesin             | Antineoplastic        | 154889-68-6 |      | C <sub>32</sub> H <sub>40</sub> BrN <sub>5</sub> O <sub>8</sub>               |
| Pibutidine               | Antitulcerative       | 103922-33-4 |      | C <sub>19</sub> H <sub>24</sub> N <sub>4</sub> O <sub>3</sub>                 |
| Picafibrate              | Antihyperlipidemic    | 57548-79-5  |      | C <sub>18</sub> H <sub>19</sub> ClN <sub>2</sub> O <sub>4</sub>               |
| Picartamide              | Antimigraine          | 76732-75-7  |      | C <sub>11</sub> H <sub>14</sub> N <sub>2</sub> S <sub>2</sub>                 |
| Picenadol                | Analgesic             | 79201-85-7  |      | C <sub>16</sub> H <sub>25</sub> NO                                            |
| Picilorex                | Anorexic              | 62510-56-9  |      | C <sub>14</sub> H <sub>18</sub> ClN                                           |
| Piclamilast              | Antiinflammatory      | 144035-83-6 |      | C <sub>18</sub> H <sub>18</sub> Cl <sub>2</sub> N <sub>2</sub> O <sub>3</sub> |
| Piclonidine              | Antihypertensive      | 72467-44-8  |      | C <sub>14</sub> H <sub>17</sub> Cl <sub>2</sub> N <sub>3</sub> O              |
| Piclopastine             | Antineoplastic        | 55837-13-3  |      | C <sub>20</sub> H <sub>26</sub> ClN <sub>3</sub> O <sub>2</sub>               |
| Picloxydine              | Antibacterial         | 5636-92-0   |      | C <sub>20</sub> H <sub>24</sub> Cl <sub>2</sub> N <sub>10</sub>               |
| Piclozotan               | Nootropic             | 182415-09-4 |      | C <sub>23</sub> H <sub>24</sub> ClN <sub>3</sub> O <sub>2</sub>               |
| Picobenzide              | Antipsychotic         | 51832-87-2  |      | C <sub>15</sub> H <sub>16</sub> N <sub>2</sub> O                              |
| Picodralazine            | Diuretic              | 17692-43-2  |      | C <sub>14</sub> H <sub>13</sub> N <sub>5</sub>                                |
| Picolamine               | Dermatologic          | 3731-52-0   |      | C <sub>6</sub> H <sub>8</sub> N <sub>2</sub>                                  |
| Piconol                  | Decongestant          | 586-98-1    |      | C <sub>6</sub> H <sub>7</sub> NO                                              |
| Picoperine               | Antitussive           | 21755-66-8  |      | C <sub>19</sub> H <sub>25</sub> N <sub>3</sub>                                |
| Picoprazole              | Antitulcerative       | 78090-11-6  |      | C <sub>17</sub> H <sub>17</sub> N <sub>3</sub> O <sub>3</sub> S               |
| Picotamide               | Antithrombotic        | 32828-81-2  |      | C <sub>21</sub> H <sub>20</sub> N <sub>4</sub> O <sub>3</sub>                 |
| Picotrin Diolamine       | Hepatic Protectant    | 64063-57-6  |      | C <sub>25</sub> H <sub>19</sub> NO <sub>2</sub>                               |
| Picric Acid              | Dermatologic          | 88-89-1     |      | C <sub>6</sub> H <sub>3</sub> N <sub>3</sub> O <sub>7</sub>                   |
| Picrotoxin               | Nootropic             | 21416-53-5  |      | C <sub>15</sub> H <sub>18</sub> O <sub>7</sub>                                |

Table S1. Cont.

| Common Name          | Indication            | CAS Number  | Oral | Molecular Formula                                                             |
|----------------------|-----------------------|-------------|------|-------------------------------------------------------------------------------|
| Picrotoxin           | Nootropic             | 17617-45-7  |      | C <sub>15</sub> H <sub>16</sub> O <sub>6</sub>                                |
| Picumast             | Antihistaminic        | 39577-19-0  |      | C <sub>25</sub> H <sub>29</sub> ClN <sub>2</sub> O <sub>3</sub>               |
| Picumeterol Fumarate | Bronchodilator        | 130641-36-0 |      | C <sub>21</sub> H <sub>29</sub> Cl <sub>2</sub> N <sub>3</sub> O <sub>2</sub> |
| Pidobenzone          | Dermatologic          | 138506-45-3 |      | C <sub>11</sub> H <sub>11</sub> NO <sub>4</sub>                               |
| Pidolacetamol        | Analgesic             | 114485-92-6 |      | C <sub>13</sub> H <sub>14</sub> N <sub>2</sub> O <sub>4</sub>                 |
| Pidolic Acid         | Unclassified          | 98-79-3     |      | C <sub>5</sub> H <sub>7</sub> NO <sub>3</sub>                                 |
| Pidotimod            | Immunomodulator       | 121808-62-6 |      | C <sub>9</sub> H <sub>12</sub> N <sub>2</sub> O <sub>4</sub> S                |
| Pifarnine            | Antitulcerative       | 56208-01-6  |      | C <sub>27</sub> H <sub>40</sub> N <sub>2</sub> O <sub>2</sub>                 |
| Pifenate             | Uricosuric            | 15686-87-0  |      | C <sub>22</sub> H <sub>27</sub> NO <sub>2</sub>                               |
| Pifexole             | Antiparkinsonian      | 27199-40-2  |      | C <sub>13</sub> H <sub>8</sub> ClN <sub>3</sub> O                             |
| Piflutixol           | Antipsychotic         | 54341-02-5  |      | C <sub>24</sub> H <sub>25</sub> F <sub>4</sub> NOS                            |
| Pifoxime             | Analgesic             | 31224-92-7  |      | C <sub>15</sub> H <sub>20</sub> N <sub>2</sub> O <sub>3</sub>                 |
| Piketopufen          | Antiinflammatory      | 60576-13-8  |      | C <sub>22</sub> H <sub>20</sub> N <sub>2</sub> O <sub>2</sub>                 |
| Pildralazine         | Vasodilator           | 64000-73-3  |      | C <sub>8</sub> H <sub>15</sub> N <sub>5</sub> O                               |
| Pilocarpine          | Antiglaucoma          | 92-13-7     | Y    | C <sub>11</sub> H <sub>16</sub> N <sub>2</sub> O <sub>2</sub>                 |
| Pilsicainide         | Antiarrhythmic        | 88069-67-4  | Y    | C <sub>17</sub> H <sub>24</sub> N <sub>2</sub> O                              |
| Pimagedine           | Antidiabetic          | 79-17-4     |      | CH <sub>6</sub> N <sub>4</sub>                                                |
| Pimeclone            | Respiratory Stimulant | 534-84-9    |      | C <sub>12</sub> H <sub>21</sub> NO                                            |
| Pimecrolimus         | Immunosuppressant     | 137071-32-0 |      | C <sub>43</sub> H <sub>68</sub> ClNO <sub>11</sub>                            |
| Pimefylline          | Vasodilator           | 10001-43-1  |      | C <sub>15</sub> H <sub>18</sub> N <sub>6</sub> O <sub>2</sub>                 |
| Pimelautide          | Immunomodulator       | 78512-63-7  |      | C <sub>29</sub> H <sub>52</sub> N <sub>6</sub> O <sub>9</sub>                 |
| Pimetacin            | Analgesic             | 79992-71-5  |      | C <sub>25</sub> H <sub>21</sub> ClN <sub>2</sub> O <sub>3</sub> S             |
| Pimethixene          | Antipsychotic         | 314-03-4    |      | C <sub>19</sub> H <sub>19</sub> NS                                            |
| Pimetine             | Antihyperlipidemic    | 3565-03-5   |      | C <sub>16</sub> H <sub>26</sub> N <sub>2</sub>                                |
| Pimetremide          | Anticonvulsant        | 578-89-2    |      | C <sub>16</sub> H <sub>18</sub> N <sub>2</sub> O <sub>2</sub>                 |
| Pimilprost           | Prostaglandin         | 139403-31-9 |      | C <sub>23</sub> H <sub>40</sub> O <sub>5</sub>                                |
| Piminodine Esylate   | Analgesic             | 13495-09-5  |      | C <sub>23</sub> H <sub>30</sub> N <sub>2</sub> O <sub>2</sub>                 |
| Pimobendan           | Cardiotonic           | 74150-27-9  | Y    | C <sub>19</sub> H <sub>18</sub> N <sub>4</sub> O <sub>2</sub>                 |
| Pimonidazole         | Antiprotozoal         | 70132-50-2  |      | C <sub>11</sub> H <sub>18</sub> N <sub>4</sub> O <sub>3</sub>                 |
| Pimozide             | Antipsychotic         | 2062-78-4   | Y    | C <sub>28</sub> H <sub>29</sub> F <sub>2</sub> N <sub>3</sub> O               |
| Pinacidil            | Antihypertensive      | 60560-33-0  |      | C <sub>13</sub> H <sub>19</sub> N <sub>5</sub>                                |
| Pinadoline           | Analgesic             | 38955-22-5  |      | C <sub>19</sub> H <sub>19</sub> Cl <sub>2</sub> N <sub>3</sub> O <sub>3</sub> |
| Pinafide             | Antineoplastic        | 54824-20-3  |      | C <sub>18</sub> H <sub>17</sub> N <sub>3</sub> O <sub>4</sub>                 |
| Pinaverium Bromide   | Antispasmodic         | 53251-94-8  | Y    | C <sub>26</sub> H <sub>41</sub> B <sub>2</sub> N <sub>4</sub> O <sub>4</sub>  |
| Pinazepam            | Anxiolytic            | 52463-83-9  |      | C <sub>18</sub> H <sub>13</sub> ClN <sub>2</sub> O                            |
| Pinainide            | Antiarrhythmic        | 83471-41-4  |      | C <sub>16</sub> H <sub>24</sub> N <sub>2</sub> O                              |
| Pindolol             | Antihypertensive      | 13523-86-9  | Y    | C <sub>14</sub> H <sub>20</sub> N <sub>2</sub> O <sub>2</sub>                 |
| Pinokalant           | Antiarrhythmic        | 149759-26-2 |      | C <sub>41</sub> H <sub>48</sub> N <sub>2</sub> O <sub>9</sub>                 |
| Pinolcaine           | Anesthetic            | 28240-18-8  |      | C <sub>23</sub> H <sub>29</sub> NO <sub>2</sub>                               |
| Pinoxepin            | Antipsychotic         | 14008-66-3  |      | C <sub>23</sub> H <sub>27</sub> ClN <sub>2</sub> O <sub>2</sub>               |
| Pioglitazone         | Antidiabetic          | 111025-46-8 | Y    | C <sub>19</sub> H <sub>20</sub> N <sub>2</sub> O <sub>3</sub> S               |
| Pipacycline          | Antibiotic            | 1110-80-1   |      | C <sub>29</sub> H <sub>38</sub> N <sub>4</sub> O <sub>9</sub>                 |
| Pipamazine           | Antiemetic            | 84-04-8     |      | C <sub>21</sub> H <sub>24</sub> ClN <sub>3</sub> OS                           |
| Pipamperone          | Antipsychotic         | 1893-33-0   |      | C <sub>21</sub> H <sub>30</sub> FN <sub>3</sub> O <sub>2</sub>                |
| Pipazethate          | Antitussive           | 2167-85-3   |      | C <sub>21</sub> H <sub>25</sub> N <sub>3</sub> O <sub>3</sub> S               |
| Pipebuzone           | Antiinflammatory      | 27315-91-9  |      | C <sub>25</sub> H <sub>32</sub> N <sub>4</sub> O <sub>2</sub>                 |
| Pipecuronium Bromide | Muscle Relaxant       | 52212-02-9  |      | C <sub>35</sub> H <sub>62</sub> Br <sub>2</sub> N <sub>4</sub> O <sub>4</sub> |
| Pipemidic Acid       | Antibiotic            | 51940-44-4  |      | C <sub>14</sub> H <sub>17</sub> N <sub>5</sub> O <sub>3</sub>                 |
| Pipendoxifene        | Progestogen           | 198480-55-6 |      | C <sub>29</sub> H <sub>32</sub> N <sub>2</sub> O <sub>3</sub>                 |
| Pipenzolate Bromide  | Antispasmodic         | 125-51-9    |      | C <sub>22</sub> H <sub>28</sub> BrNO <sub>3</sub>                             |
| Pipequaline          | Anxiolytic            | 77472-98-1  |      | C <sub>22</sub> H <sub>24</sub> N <sub>2</sub>                                |
| Piperacetazine       | Antipsychotic         | 3819-00-9   |      | C <sub>24</sub> H <sub>30</sub> N <sub>2</sub> O <sub>2</sub> S               |
| Piperacillin         | Antibiotic            | 61477-96-1  |      | C <sub>23</sub> H <sub>27</sub> N <sub>5</sub> O <sub>7</sub> S               |
| Piperamide Maleate   | Anthelminthic         | 299-48-9    |      | C <sub>17</sub> H <sub>28</sub> N <sub>4</sub> O                              |
| Piperazine           | Anthelminthic         | 110-85-0    |      | C <sub>4</sub> H <sub>10</sub> N <sub>2</sub>                                 |
| Piperidine Phosphate | Unclassified          | 110-89-4    |      | C <sub>5</sub> H <sub>11</sub> N                                              |
| Piperidione          | Antitussive           | 77-03-2     |      | C <sub>9</sub> H <sub>15</sub> NO <sub>2</sub>                                |
| Piperidolate         | Antispasmodic         | 82-98-4     |      | C <sub>21</sub> H <sub>25</sub> NO <sub>2</sub>                               |
| Piperilate           | Antispasmodic         | 4546-39-8   |      | C <sub>21</sub> H <sub>25</sub> NO <sub>3</sub>                               |
| Piperine             | Antibacterial         | 94-62-2     |      | C <sub>17</sub> H <sub>19</sub> NO <sub>3</sub>                               |
| Piperocaine          | Anesthetic            | 136-82-3    |      | C <sub>16</sub> H <sub>23</sub> NO <sub>2</sub>                               |
| Piperonyl Butoxide   | Anthelminthic         | 51-03-6     |      | C <sub>19</sub> H <sub>30</sub> O <sub>5</sub>                                |
| Piperoxan            | Antihypertensive      | 59-39-2     |      | C <sub>14</sub> H <sub>19</sub> NO <sub>2</sub>                               |



Table S1. Cont.

| Common Name            | Indication                   | CAS Number  | Oral | Molecular Formula                                                                |
|------------------------|------------------------------|-------------|------|----------------------------------------------------------------------------------|
| Piperphenidol          | Antiemetic                   | 90-23-3     |      | C <sub>18</sub> H <sub>29</sub> NO                                               |
| Piperylone             | Analgesic                    | 2531-04-6   |      | C <sub>17</sub> H <sub>23</sub> N <sub>3</sub> O                                 |
| Pipobroman             | Antineoplastic               | 54-91-1     |      | C <sub>10</sub> H <sub>16</sub> Br <sub>2</sub> N <sub>2</sub> O <sub>2</sub>    |
| Pipoctanone            | Bone Resorption Inhibitor    | 18841-58-2  |      | C <sub>22</sub> H <sub>35</sub> NO                                               |
| Pipofezine             | Unclassified                 | 24886-52-0  |      | C <sub>16</sub> H <sub>19</sub> N <sub>5</sub> O                                 |
| Piposulfan             | Antineoplastic               | 2608-24-4   |      | C <sub>12</sub> H <sub>22</sub> N <sub>2</sub> O <sub>8</sub> S <sub>2</sub>     |
| Pipotiazine Palmitate  | Antipsychotic                | 37517-26-3  |      | C <sub>40</sub> H <sub>63</sub> N <sub>3</sub> O <sub>4</sub> S <sub>2</sub>     |
| Pipoxizine             | Sedative                     | 55837-21-3  |      | C <sub>24</sub> H <sub>31</sub> NO <sub>3</sub>                                  |
| Pipoxolan              | Muscle Relaxant              | 23744-24-3  |      | C <sub>22</sub> H <sub>25</sub> NO <sub>3</sub>                                  |
| Pipradimadol           | Analgesic                    | 68797-29-5  |      | C <sub>24</sub> H <sub>37</sub> ClN <sub>2</sub> O <sub>2</sub>                  |
| Pipradrol              | Nootropic                    | 467-60-7    |      | C <sub>18</sub> H <sub>21</sub> NO                                               |
| Pipramadol             | Analgesic                    | 55313-67-2  |      | C <sub>23</sub> H <sub>35</sub> ClN <sub>2</sub> O <sub>2</sub>                  |
| Pipratecol             | Antitulcerative              | 15534-05-1  |      | C <sub>19</sub> H <sub>24</sub> N <sub>2</sub> O <sub>4</sub>                    |
| Piprocuarium Iodide    | Neuromuscular Blocking Agent | 3562-55-8   |      | C <sub>23</sub> H <sub>40</sub> I <sub>2</sub> N <sub>2</sub> O <sub>3</sub>     |
| Piprofurol             | Antiarrhythmic               | 40680-87-3  |      | C <sub>26</sub> H <sub>33</sub> NO <sub>6</sub>                                  |
| Piprozolin             | Choleretic                   | 17243-64-0  |      | C <sub>14</sub> H <sub>22</sub> N <sub>2</sub> O <sub>3</sub> S                  |
| Piquindone             | Antipsychotic                | 78541-97-6  |      | C <sub>15</sub> H <sub>22</sub> N <sub>2</sub> O                                 |
| Piquizil               | Bronchodilator               | 21560-58-7  |      | C <sub>19</sub> H <sub>26</sub> N <sub>4</sub> O <sub>4</sub>                    |
| Piracetam              | Nootropic                    | 7491-74-9   | Y    | C <sub>6</sub> H <sub>10</sub> N <sub>2</sub> O <sub>2</sub>                     |
| Pirandamine            | Antidepressant               | 42408-79-7  |      | C <sub>17</sub> H <sub>23</sub> NO                                               |
| Pirarubicin            | Antineoplastic               | 72496-41-4  |      | C <sub>32</sub> H <sub>37</sub> NO <sub>12</sub>                                 |
| Piraxelate             | Unclassified                 | 82209-39-0  |      | C <sub>15</sub> H <sub>25</sub> NO <sub>3</sub>                                  |
| Pirazmonam Sodium      | Antibiotic                   | 108319-07-9 |      | C <sub>22</sub> H <sub>24</sub> N <sub>10</sub> O <sub>12</sub> S <sub>2</sub>   |
| Pirazolac              | Antirheumatic                | 71002-09-0  |      | C <sub>17</sub> H <sub>12</sub> ClFN <sub>2</sub> O <sub>2</sub>                 |
| Pirbenicillin Sodium   | Antibacterial                | 55975-92-3  |      | C <sub>24</sub> H <sub>26</sub> N <sub>6</sub> O <sub>5</sub> S                  |
| Pirbuterol             | Bronchodilator               | 38677-81-5  |      | C <sub>12</sub> H <sub>20</sub> N <sub>2</sub> O <sub>3</sub>                    |
| Pirdonium Bromide      | Antihistaminic               | 35620-67-8  |      | C <sub>22</sub> H <sub>30</sub> NOBr                                             |
| Pirenoxine             | Ophthalmic                   | 1043-21-6   |      | C <sub>16</sub> H <sub>8</sub> N <sub>2</sub> O <sub>5</sub>                     |
| Pirenperone            | Antidote                     | 75444-65-4  |      | C <sub>23</sub> H <sub>24</sub> FN <sub>3</sub> O <sub>2</sub>                   |
| Pirenzepine            | Antitulcerative              | 28797-61-7  | Y    | C <sub>19</sub> H <sub>21</sub> N <sub>5</sub> O <sub>2</sub>                    |
| Pirepolol              | Antihypertensive             | 69479-26-1  |      | C <sub>21</sub> H <sub>32</sub> N <sub>4</sub> O <sub>5</sub>                    |
| Piretanide             | Diuretic                     | 55837-27-9  | Y    | C <sub>17</sub> H <sub>18</sub> N <sub>2</sub> O <sub>5</sub> S                  |
| Pirfenidone            | Analgesic                    | 53179-13-8  | Y    | C <sub>12</sub> H <sub>11</sub> NO                                               |
| Piribedil              | Vasodilator                  | 3605-01-4   | Y    | C <sub>16</sub> H <sub>18</sub> N <sub>4</sub> O <sub>2</sub>                    |
| Piridicillin Sodium    | Antibacterial                | 69414-41-1  |      | C <sub>32</sub> H <sub>35</sub> N <sub>5</sub> O <sub>11</sub> S <sub>2</sub> Na |
| Piridocaine            | Analgesic                    | 87-21-8     |      | C <sub>14</sub> H <sub>20</sub> N <sub>2</sub> O <sub>2</sub>                    |
| Piridoxilate           | Nootropic                    | 46794-57-4  |      | C <sub>10</sub> H <sub>13</sub> NO <sub>6</sub>                                  |
| Piridoxilate           | Nootropic                    | 17692-44-3  |      | C <sub>10</sub> H <sub>13</sub> NO <sub>6</sub>                                  |
| Piridronic Acid        | Bone Resorption Inhibitor    | 75755-07-6  |      | C <sub>7</sub> H <sub>11</sub> NO <sub>6</sub> P <sub>2</sub>                    |
| Pirifibrate            | Antihyperlipidemic           | 55285-45-5  |      | C <sub>17</sub> H <sub>18</sub> ClNO <sub>4</sub>                                |
| Pirinidazole           | Antiprotozoal                | 55432-15-0  |      | C <sub>10</sub> H <sub>10</sub> N <sub>4</sub> O <sub>2</sub> S                  |
| Pirinixic Acid         | Antihyperlipidemic           | 50892-23-4  |      | C <sub>14</sub> H <sub>14</sub> ClN <sub>3</sub> O <sub>2</sub> S                |
| Pirinixil              | Antihyperlipidemic           | 65089-17-0  |      | C <sub>16</sub> H <sub>19</sub> ClN <sub>4</sub> O <sub>2</sub> S                |
| Piriprost              | Bronchodilator               | 79672-88-1  |      | C <sub>26</sub> H <sub>35</sub> NO <sub>4</sub>                                  |
| Piriqualone            | Muscle Relaxant              | 1897-89-8   |      | C <sub>22</sub> H <sub>17</sub> N <sub>3</sub> O                                 |
| Pirisudanol            | Antidepressant               | 33605-94-6  |      | C <sub>16</sub> H <sub>24</sub> N <sub>2</sub> O <sub>6</sub>                    |
| Piritramide            | Analgesic                    | 302-41-0    |      | C <sub>27</sub> H <sub>34</sub> N <sub>4</sub> O                                 |
| Piritrexim Isethionate | Antineoplastic               | 72732-56-0  |      | C <sub>17</sub> H <sub>19</sub> N <sub>5</sub> O <sub>2</sub>                    |
| Pirlimycin             | Antibacterial                | 79548-73-5  |      | C <sub>17</sub> H <sub>31</sub> ClN <sub>2</sub> O <sub>5</sub> S                |
| Pirlindole             | Antidepressant               | 60762-57-4  |      | C <sub>15</sub> H <sub>18</sub> N <sub>2</sub>                                   |
| Pirmagrel              | Antithrombotic               | 85691-74-3  |      | C <sub>13</sub> H <sub>16</sub> N <sub>2</sub> O <sub>2</sub>                    |
| Pirmenol               | Antiarrhythmic               | 68252-19-7  |      | C <sub>22</sub> H <sub>30</sub> N <sub>2</sub> O                                 |
| Pirnabine              | Antiglaucoma                 | 19825-63-9  | Y    | C <sub>19</sub> H <sub>24</sub> O <sub>3</sub>                                   |
| Piroctone              | Dermatologic                 | 50650-76-5  |      | C <sub>14</sub> H <sub>23</sub> NO <sub>2</sub>                                  |
| Pirodavir              | Antiviral                    | 124436-59-5 |      | C <sub>21</sub> H <sub>27</sub> N <sub>3</sub> O <sub>3</sub>                    |
| Pirodomast             | Antihistamine                | 108310-20-9 |      | C <sub>18</sub> H <sub>17</sub> N <sub>3</sub> O <sub>2</sub>                    |
| Pirogliride Tartrate   | Antidiabetic                 | 62625-18-7  |      | C <sub>16</sub> H <sub>22</sub> N <sub>4</sub>                                   |
| Piroheptine            | Antiparkinsonian             | 16378-21-5  |      | C <sub>22</sub> H <sub>25</sub> N                                                |
| Pirolate               | Bronchodilator               | 55149-05-8  |      | C <sub>16</sub> H <sub>15</sub> N <sub>3</sub> O <sub>5</sub>                    |
| Pirolazamide           | Antiarrhythmic               | 39186-49-7  |      | C <sub>23</sub> H <sub>29</sub> N <sub>3</sub> O                                 |
| Piromidic Acid         | Antibacterial                | 19562-30-2  |      | C <sub>14</sub> H <sub>16</sub> N <sub>4</sub> O <sub>3</sub>                    |
| Piroxantrone           | Antineoplastic               | 91441-23-5  |      | C <sub>21</sub> H <sub>25</sub> N <sub>5</sub> O <sub>4</sub>                    |

Table S1. Cont.

| Common Name                            | Indication         | CAS Number  | Oral | Molecular Formula                                                                             |
|----------------------------------------|--------------------|-------------|------|-----------------------------------------------------------------------------------------------|
| Piroxicam                              | Antiinflammatory   | 36322-90-4  | Y    | C <sub>15</sub> H <sub>13</sub> N <sub>3</sub> O <sub>4</sub> S                               |
| Piroxicam Cinnamate                    | Antiinflammatory   | 87234-24-0  |      | C <sub>24</sub> H <sub>19</sub> N <sub>3</sub> O <sub>5</sub> S                               |
| Piroxicillin                           | Antibiotic         | 82509-56-6  |      | C <sub>27</sub> H <sub>28</sub> N <sub>8</sub> O <sub>9</sub> S <sub>2</sub>                  |
| Piroximone                             | Cardiotonic        | 84490-12-0  |      | C <sub>11</sub> H <sub>11</sub> N <sub>3</sub> O <sub>2</sub>                                 |
| Pirozadil                              | Antihyperlipidemic | 54110-25-7  |      | C <sub>27</sub> H <sub>29</sub> NO <sub>10</sub>                                              |
| Pirprofen                              | Antiinflammatory   | 31793-07-4  |      | C <sub>13</sub> H <sub>14</sub> ClNO <sub>2</sub>                                             |
| Pirquinozol                            | Antihistaminic     | 65950-99-4  |      | C <sub>11</sub> H <sub>9</sub> N <sub>3</sub> O <sub>2</sub>                                  |
| Pirsidomine                            | Vasodilator        | 132722-74-8 |      | C <sub>17</sub> H <sub>22</sub> N <sub>4</sub> O <sub>3</sub>                                 |
| Pirtenidine                            | Antibacterial      | 103923-27-9 |      | C <sub>21</sub> H <sub>38</sub> N <sub>2</sub>                                                |
| Pitavastatin                           | Antihyperlipidemic | 147511-69-1 | Y    | C <sub>25</sub> H <sub>24</sub> FNO <sub>4</sub>                                              |
| Pitenodil                              | Cardiotonic        | 59840-71-0  |      | C <sub>17</sub> H <sub>27</sub> N <sub>3</sub> O <sub>3</sub> S                               |
| Pitofenone                             | Antispasmodic      | 54063-52-4  |      | C <sub>22</sub> H <sub>25</sub> NO <sub>4</sub>                                               |
| Pituxate                               | Antilucerative     | 39123-11-0  |      | C <sub>23</sub> H <sub>27</sub> NO <sub>2</sub>                                               |
| Pivagabine                             | Anticonvulsant     | 69542-93-4  |      | C <sub>9</sub> H <sub>17</sub> NO <sub>3</sub>                                                |
| Pivampicillin                          | Antibacterial      | 33817-20-8  |      | C <sub>22</sub> H <sub>29</sub> N <sub>3</sub> O <sub>6</sub> S                               |
| Pivenfrine                             | Unclassified       | 71206-88-7  |      | C <sub>14</sub> H <sub>21</sub> NO <sub>3</sub>                                               |
| Pivhydrazine                           | Antidepressant     | 306-19-4    |      | C <sub>12</sub> H <sub>18</sub> N <sub>2</sub> O                                              |
| Pivopril                               | Antihypertensive   | 81045-50-3  |      | C <sub>16</sub> H <sub>27</sub> NO <sub>4</sub> S                                             |
| Pivoxazepam                            | Anxiolytic         | 55299-10-0  |      | C <sub>20</sub> H <sub>19</sub> ClN <sub>2</sub> O <sub>3</sub>                               |
| Pixantrone                             | Antineoplastic     | 144510-96-3 |      | C <sub>17</sub> H <sub>19</sub> N <sub>5</sub> O <sub>2</sub>                                 |
| Pizotyline                             | Antidepressant     | 15574-96-6  |      | C <sub>19</sub> H <sub>21</sub> NS                                                            |
| Plafibrade                             | Antithrombotic     | 63394-05-8  |      | C <sub>16</sub> H <sub>22</sub> ClN <sub>3</sub> O <sub>4</sub>                               |
| Platonin                               | Immunomodulator    | 6009-02-5   |      | C <sub>38</sub> H <sub>61</sub> N <sub>3</sub> S <sub>3</sub> .2Cl                            |
| Planutol                               | Antilucerative     | 64218-02-6  | Y    | C <sub>20</sub> H <sub>34</sub> O <sub>2</sub>                                                |
| Pleconaril                             | Antiviral          | 153168-05-9 |      | C <sub>18</sub> H <sub>18</sub> F <sub>3</sub> N <sub>3</sub> O <sub>3</sub>                  |
| Plerixafor                             | Antineoplastic     | 110078-46-1 |      | C <sub>28</sub> H <sub>54</sub> N <sub>8</sub>                                                |
| Pleuromulin                            | Antibiotic         | 125-65-5    |      | C <sub>22</sub> H <sub>34</sub> O <sub>5</sub>                                                |
| Plevitrexed                            | Antineoplastic     | 153537-73-6 |      | C <sub>26</sub> H <sub>25</sub> FN <sub>8</sub> O <sub>4</sub>                                |
| Plomestane                             | Antineoplastic     | 77016-85-4  |      | C <sub>21</sub> H <sub>26</sub> O <sub>2</sub>                                                |
| P Nitrophenyl O Ethyl Ethylphosphonate | Unclassified       | 546-71-4    |      | C <sub>10</sub> H <sub>14</sub> NO <sub>5</sub> P                                             |
| Pobilukast Edamine                     | Bronchodilator     | 107023-41-6 |      | C <sub>26</sub> H <sub>34</sub> O <sub>5</sub> S                                              |
| Podilfen                               | Unclassified       | 13409-53-5  |      | C <sub>18</sub> H <sub>23</sub> N <sub>3</sub> O <sub>2</sub> S                               |
| Podofilox                              | Antiviral          | 518-28-5    |      | C <sub>22</sub> H <sub>22</sub> O <sub>8</sub>                                                |
| Polaprezinc                            | Antilucerative     | 107667-60-7 | Y    | C <sub>9</sub> H <sub>12</sub> N <sub>4</sub> O <sub>3</sub> Zn                               |
| Poldine                                | Mydriatic          | 596-50-9    |      | C <sub>21</sub> H <sub>26</sub> NO <sub>3</sub>                                               |
| Polythiazide                           | Diuretic           | 346-18-9    | Y    | C <sub>11</sub> H <sub>13</sub> ClF <sub>3</sub> N <sub>3</sub> O <sub>4</sub> S <sub>3</sub> |
| Pomisartan                             | Antihypertensive   | 144702-17-0 |      | C <sub>31</sub> H <sub>30</sub> N <sub>4</sub> O <sub>2</sub>                                 |
| Ponalrestat                            | Antidiabetic       | 72702-95-5  |      | C <sub>17</sub> H <sub>12</sub> BrFN <sub>2</sub> O <sub>3</sub>                              |
| Ponazuril                              | Antibiotic         | 69004-04-2  |      | C <sub>18</sub> H <sub>14</sub> F <sub>3</sub> N <sub>3</sub> O <sub>6</sub> S                |
| Ponfibrate                             | Antihyperlipidemic | 53341-49-4  |      | C <sub>18</sub> H <sub>16</sub> Cl <sub>2</sub> O <sub>4</sub>                                |
| Porfiromycin                           | Antibacterial      | 801-52-5    |      | C <sub>16</sub> H <sub>20</sub> N <sub>4</sub> O <sub>5</sub>                                 |
| Posaconazole                           | Antifungal         | 171228-49-2 | Y    | C <sub>37</sub> H <sub>42</sub> F <sub>2</sub> N <sub>8</sub> O <sub>4</sub>                  |
| Posatirelin                            | Pituitary          | 78664-73-0  |      | C <sub>17</sub> H <sub>28</sub> N <sub>4</sub> O <sub>4</sub>                                 |
| Posizolid                              | Antibiotic         | 252260-02-9 | Y    | C <sub>21</sub> H <sub>21</sub> F <sub>2</sub> N <sub>3</sub> O <sub>7</sub>                  |
| Poskine                                | Anxiolytic         | 585-14-8    |      | C <sub>20</sub> H <sub>25</sub> NO <sub>5</sub>                                               |
| Nitrazepate                            | Anxiolytic         | 60676-80-4  |      | C <sub>16</sub> H <sub>11</sub> N <sub>3</sub> O <sub>5</sub>                                 |
| Thiocyanate                            | Unclassified       | 302-04-5    |      | CNS                                                                                           |
| Practolol                              | Antiarrhythmic     | 6673-35-4   |      | C <sub>14</sub> H <sub>22</sub> N <sub>2</sub> O <sub>3</sub>                                 |
| Pradefovir Mesylate                    | Antiviral          | 625095-60-5 | Y    | C <sub>17</sub> H <sub>19</sub> ClN <sub>5</sub> O <sub>4</sub> P                             |
| Pradofloxacin                          | Antibiotic         | 195532-12-8 |      | C <sub>21</sub> H <sub>21</sub> FN <sub>4</sub> O <sub>3</sub>                                |
| Prajmalium Bitartrate                  | Antiarrhythmic     | 2589-47-1   | Y    | C <sub>27</sub> H <sub>38</sub> N <sub>2</sub> O <sub>8</sub>                                 |
| Pralatrexate                           | Antineoplastic     | 146464-95-1 |      | C <sub>23</sub> H <sub>23</sub> N <sub>7</sub> O <sub>5</sub>                                 |
| Pralidoxime                            | Antidote           | 6735-59-7   |      | C <sub>7</sub> H <sub>9</sub> N <sub>2</sub> O                                                |
| Pralmorelin Dihydrochloride            | Pituitary          | 158861-67-7 |      | C <sub>45</sub> H <sub>55</sub> N <sub>9</sub> O <sub>6</sub>                                 |
| Pralnacasan                            | Antirheumatic      | 192755-52-5 |      | C <sub>26</sub> H <sub>29</sub> N <sub>5</sub> O <sub>7</sub>                                 |
| Pramipexole                            | Antiparkinsonian   | 104632-26-0 | Y    | C <sub>10</sub> H <sub>17</sub> N <sub>3</sub> S                                              |
| Pramiracetam                           | Nootropic          | 68497-62-1  | Y    | C <sub>14</sub> H <sub>27</sub> N <sub>3</sub> O <sub>2</sub>                                 |
| Pramiverine                            | Antispasmodic      | 14334-40-8  |      | C <sub>21</sub> H <sub>27</sub> N                                                             |
| Pramoxine                              | Anesthetic         | 140-65-8    |      | C <sub>17</sub> H <sub>27</sub> NO <sub>3</sub>                                               |
| Prampine                               | Unclassified       | 7009-65-6   |      | C <sub>20</sub> H <sub>27</sub> NO <sub>4</sub>                                               |
| Pranazepide                            | Antispasmodic      | 150408-73-4 |      | C <sub>26</sub> H <sub>19</sub> FN <sub>4</sub> O <sub>2</sub>                                |
| Pranidipine                            | Antihypertensive   | 99522-79-9  |      | C <sub>25</sub> H <sub>24</sub> N <sub>2</sub> O <sub>6</sub>                                 |

Table S1. Cont.

| Common Name                   | Indication         | CAS Number  | Oral | Molecular Formula                                                               |
|-------------------------------|--------------------|-------------|------|---------------------------------------------------------------------------------|
| Pranlukast                    | Bronchodilator     | 103177-37-3 | Y    | C <sub>27</sub> H <sub>23</sub> N <sub>5</sub> O <sub>4</sub>                   |
| Pranolium Chloride            | Antiarrhythmic     | 42879-47-0  |      | C <sub>18</sub> H <sub>26</sub> ClNO <sub>2</sub>                               |
| Pranoprofen                   | Antiinflammatory   | 52549-17-4  |      | C <sub>15</sub> H <sub>13</sub> NO <sub>3</sub>                                 |
| Pranosal                      | Unclassified       | 17716-89-1  |      | C <sub>16</sub> H <sub>23</sub> NO <sub>3</sub>                                 |
| Prasterone                    | Steroid            | 53-43-0     | Y    | C <sub>19</sub> H <sub>28</sub> O <sub>2</sub>                                  |
| Prasugrel                     | Anticoagulant      | 150322-43-3 | Y    | C <sub>20</sub> H <sub>20</sub> FNO <sub>3</sub> S                              |
| Pratosartan                   | Antihypertensive   | 153804-05-8 | Y    | C <sub>25</sub> H <sub>26</sub> N <sub>6</sub> O                                |
| Pravadoline                   | Analgesic          | 92623-83-1  |      | C <sub>23</sub> H <sub>26</sub> N <sub>2</sub> O <sub>3</sub>                   |
| Pravastatin Sodium            | Antihyperlipidemic | 81093-37-0  | Y    | C <sub>23</sub> H <sub>36</sub> O <sub>7</sub>                                  |
| Praxadine                     | Antibiotic         | 4023-00-1   |      | C <sub>4</sub> H <sub>6</sub> N <sub>4</sub>                                    |
| Prazepam                      | Sedative           | 2955-38-6   | Y    | C <sub>19</sub> H <sub>17</sub> ClN <sub>2</sub> O                              |
| Prazepine                     | Anticonvulsant     | 50-49-7     |      | C <sub>19</sub> H <sub>24</sub> N <sub>2</sub>                                  |
| Praziquantel                  | Anthelminthic      | 55268-74-1  | Y    | C <sub>19</sub> H <sub>24</sub> N <sub>2</sub> O <sub>2</sub>                   |
| Prazitone                     | Antipsychotic      | 2409-26-9   |      | C <sub>16</sub> H <sub>19</sub> N <sub>3</sub> O <sub>3</sub>                   |
| Prazocillin                   | Antibiotic         | 15949-72-1  |      | C <sub>19</sub> H <sub>18</sub> Cl <sub>2</sub> N <sub>4</sub> O <sub>4</sub> S |
| Prazosin                      | Antihypertensive   | 19216-56-9  | Y    | C <sub>19</sub> H <sub>21</sub> N <sub>5</sub> O <sub>4</sub>                   |
| Preclamol                     | Antipsychotic      | 85966-89-8  |      | C <sub>14</sub> H <sub>21</sub> NO                                              |
| Prednazoline                  | Antiinflammatory   | 4846-91-7   |      | C <sub>13</sub> H <sub>18</sub> N <sub>2</sub> O                                |
| Prednicarbate                 | Glucocorticoid     | 73771-04-7  |      | C <sub>27</sub> H <sub>36</sub> O <sub>8</sub>                                  |
| Prednimustine                 | Antineoplastic     | 29069-24-7  |      | C <sub>35</sub> H <sub>45</sub> Cl <sub>2</sub> NO <sub>6</sub>                 |
| Prednisolamate                | Glucocorticoid     | 5626-34-6   |      | C <sub>27</sub> H <sub>39</sub> NO <sub>6</sub>                                 |
| Prednisolone                  | Glucocorticoid     | 50-24-8     | Y    | C <sub>21</sub> H <sub>28</sub> O <sub>5</sub>                                  |
| Prednisolone Acetate          | Glucocorticoid     | 52-21-1     | Y    | C <sub>23</sub> H <sub>30</sub> O <sub>6</sub>                                  |
| Prednisolone Hemisuccinate    | Glucocorticoid     | 2920-86-7   |      | C <sub>25</sub> H <sub>32</sub> O <sub>8</sub>                                  |
| Prednisolone Pivalate         | Glucocorticoid     | 1107-99-9   |      | C <sub>26</sub> H <sub>36</sub> O <sub>6</sub>                                  |
| Prednisolone Sodium Phosphate | Glucocorticoid     | 302-25-0    |      | C <sub>21</sub> H <sub>29</sub> O <sub>8</sub> P                                |
| Prednisolone Steaglate        | Glucocorticoid     | 5060-55-9   |      | C <sub>41</sub> H <sub>64</sub> O <sub>8</sub>                                  |
| Prednisolone Tebutate         | Glucocorticoid     | 7681-14-3   |      | C <sub>27</sub> H <sub>38</sub> O <sub>6</sub>                                  |
| Prednisolone Valerate Acetate | Glucocorticoid     | 72064-79-0  |      | C <sub>28</sub> H <sub>38</sub> O <sub>7</sub>                                  |
| Prednisone                    | Glucocorticoid     | 53-03-2     | Y    | C <sub>21</sub> H <sub>26</sub> O <sub>5</sub>                                  |
| Prednival                     | Glucocorticoid     | 15180-00-4  |      | C <sub>26</sub> H <sub>36</sub> O <sub>6</sub>                                  |
| Prednylidene                  | Glucocorticoid     | 599-33-7    |      | C <sub>22</sub> H <sub>28</sub> O <sub>5</sub>                                  |
| Prefenamate                   | Antiinflammatory   | 57775-28-7  |      | C <sub>19</sub> H <sub>18</sub> F <sub>3</sub> NO <sub>2</sub>                  |
| Pregabalin                    | Anticonvulsant     | 148553-50-8 | Y    | C <sub>8</sub> H <sub>17</sub> NO <sub>2</sub>                                  |
| Pregnandiol                   | Progestogen        | 25908-35-4  |      | C <sub>21</sub> H <sub>36</sub> O <sub>2</sub>                                  |
| Pregnenolone                  | Progestogen        | 145-13-1    |      | C <sub>21</sub> H <sub>32</sub> O <sub>2</sub>                                  |
| Pregnenolone Acetate          | Progestogen        | 1778-02-5   |      | C <sub>23</sub> H <sub>34</sub> O <sub>3</sub>                                  |
| Pregnenolone Succinate        | Progestogen        | 4598-67-8   |      | C <sub>25</sub> H <sub>36</sub> O <sub>5</sub>                                  |
| Premafloxacin                 | Antibacterial      | 143383-65-7 |      | C <sub>21</sub> H <sub>26</sub> FN <sub>3</sub> O <sub>4</sub>                  |
| Premazepam                    | Anxiolytic         | 57435-86-6  |      | C <sub>15</sub> H <sub>15</sub> N <sub>3</sub> O                                |
| Prenalterol                   | Adrenergic         | 57526-81-5  |      | C <sub>12</sub> H <sub>19</sub> NO <sub>3</sub>                                 |
| Prenderol                     | Unclassified       | 115-76-4    |      | C <sub>7</sub> H <sub>16</sub> O <sub>2</sub>                                   |
| Prenisteine                   | Antitussive        | 5287-46-7   |      | C <sub>8</sub> H <sub>15</sub> NO <sub>2</sub> S                                |
| Prenoverine                   | Mucolytic          | 66022-25-1  |      | C <sub>25</sub> H <sub>29</sub> NO <sub>2</sub>                                 |
| Prenoxdiazine                 | Antitussive        | 47543-65-7  |      | C <sub>23</sub> H <sub>27</sub> N <sub>3</sub> O                                |
| Prenylamine                   | Vasodilator        | 390-64-7    |      | C <sub>24</sub> H <sub>27</sub> N                                               |
| Pretamazium Iodide            | Unclassified       | 24840-59-3  |      | C <sub>29</sub> H <sub>29</sub> N <sub>2</sub> SI                               |
| Pretiadil                     | Antianginal        | 30840-27-8  |      | C <sub>26</sub> H <sub>31</sub> N <sub>3</sub> O <sub>2</sub> S                 |
| Pribecaine                    | Anesthetic         | 55837-22-4  |      | C <sub>16</sub> H <sub>23</sub> NO <sub>3</sub>                                 |
| Pridefine                     | Antidepressant     | 5370-41-2   |      | C <sub>19</sub> H <sub>21</sub> N                                               |
| Prideperone                   | Antipsychotic      | 95374-52-0  |      | C <sub>23</sub> H <sub>24</sub> FN <sub>3</sub> O <sub>3</sub>                  |
| Pridinol                      | Antiparkinsonian   | 511-45-5    |      | C <sub>20</sub> H <sub>25</sub> NO                                              |
| Prifelone                     | Antiinflammatory   | 69425-13-4  |      | C <sub>19</sub> H <sub>24</sub> O <sub>2</sub> S                                |
| Prifinium Bromide             | Antispasmodic      | 4630-95-9   |      | C <sub>22</sub> H <sub>28</sub> BrN                                             |
| Prifuroline                   | Antipsychotic      | 70833-07-7  |      | C <sub>14</sub> H <sub>16</sub> N <sub>2</sub> O                                |
| Prilocaine                    | Anesthetic         | 721-50-6    |      | C <sub>13</sub> H <sub>20</sub> N <sub>2</sub> O                                |
| Primaperone                   | Antipsychotic      | 1219-35-8   |      | C <sub>15</sub> H <sub>20</sub> FNO                                             |
| Primaquine                    | Antimalarial       | 90-34-6     | Y    | C <sub>15</sub> H <sub>21</sub> N <sub>3</sub> O                                |
| Primidolol                    | Antihypertensive   | 67227-55-8  |      | C <sub>17</sub> H <sub>23</sub> N <sub>3</sub> O <sub>4</sub>                   |
| Prinomastat                   | Antineoplastic     | 192329-42-3 |      | C <sub>18</sub> H <sub>21</sub> N <sub>3</sub> O <sub>5</sub> S <sub>2</sub>    |
| Prinomide Tromethamine        | Antirheumatic      | 77639-66-8  |      | C <sub>15</sub> H <sub>13</sub> N <sub>3</sub> O <sub>2</sub>                   |
| Prinoxodan                    | Cardiotonic        | 111786-07-3 |      | C <sub>13</sub> H <sub>14</sub> N <sub>4</sub> O <sub>2</sub>                   |
| Prisotinol                    | Nootropic          | 76906-79-1  |      | C <sub>11</sub> H <sub>18</sub> N <sub>2</sub> O                                |

Table S1. Cont.

| Common Name                | Indication         | CAS Number | Oral | Molecular Formula                                                             |
|----------------------------|--------------------|------------|------|-------------------------------------------------------------------------------|
| Prizidilol                 | Antihypertensive   | 59010-44-5 |      | C <sub>17</sub> H <sub>25</sub> N <sub>5</sub> O <sub>2</sub>                 |
| Proadifen                  | Antidiabetic       | 302-33-0   |      | C <sub>23</sub> H <sub>31</sub> NO <sub>2</sub>                               |
| Probarbital Sodium         | Sedative           | 76-76-6    |      | C <sub>9</sub> H <sub>14</sub> N <sub>2</sub> O <sub>3</sub>                  |
| Probenecid                 | Uricosuric         | 57-66-9    | Y    | C <sub>13</sub> H <sub>19</sub> NO <sub>4</sub> S                             |
| Probicromil Calcium        | Antihistaminic     | 58805-38-2 |      | C <sub>17</sub> H <sub>12</sub> O <sub>8</sub>                                |
| Probucof                   | Antihyperlipidemic | 23288-49-5 |      | C <sub>31</sub> H <sub>48</sub> O <sub>2</sub> S <sub>2</sub>                 |
| Procainamide               | Antiarrhythmic     | 51-06-9    | Y    | C <sub>13</sub> H <sub>21</sub> N <sub>3</sub> O                              |
| Procaine                   | Anesthetic         | 59-46-1    | Y    | C <sub>13</sub> H <sub>20</sub> N <sub>2</sub> O <sub>2</sub>                 |
| Procarbazine               | Antineoplastic     | 671-16-9   | Y    | C <sub>12</sub> H <sub>19</sub> N <sub>3</sub> O                              |
| Procaterol                 | Bronchodilator     | 72332-33-3 |      | C <sub>16</sub> H <sub>22</sub> N <sub>2</sub> O <sub>3</sub>                 |
| Prochlorperazine           | Antiemetic         | 58-38-8    | Y    | C <sub>20</sub> H <sub>24</sub> ClN <sub>3</sub> S                            |
| Procinolol                 | Antihypertensive   | 27325-36-6 |      | C <sub>15</sub> H <sub>23</sub> NO <sub>2</sub>                               |
| Procinonide                | Steroid            | 58497-00-0 |      | C <sub>27</sub> H <sub>34</sub> F <sub>2</sub> O <sub>7</sub>                 |
| Proclonol                  | Anthelminthic      | 14088-71-2 |      | C <sub>16</sub> H <sub>14</sub> Cl <sub>2</sub> O                             |
| Procodazole                | Immunomodulator    | 23249-97-0 |      | C <sub>10</sub> H <sub>10</sub> N <sub>2</sub> O <sub>2</sub>                 |
| Procyclidine               | Antiparkinsonian   | 77-37-2    | Y    | C <sub>19</sub> H <sub>29</sub> NO                                            |
| Procymate                  | Anxiolytic         | 13931-64-1 |      | C <sub>10</sub> H <sub>19</sub> NO <sub>2</sub>                               |
| Prodeconium Bromide        | Antifungal         | 3690-61-7  |      | C <sub>28</sub> H <sub>58</sub> Br <sub>2</sub> N <sub>2</sub> O <sub>6</sub> |
| Prodilidine                | Analgesic          | 3734-17-6  |      | C <sub>15</sub> H <sub>21</sub> NO <sub>2</sub>                               |
| Prodipine                  | Antiparkinsonian   | 31314-38-2 |      | C <sub>20</sub> H <sub>25</sub> N                                             |
| Prodolic Acid              | Antiinflammatory   | 36505-82-5 |      | C <sub>16</sub> H <sub>19</sub> NO <sub>3</sub>                               |
| Profadol                   | Analgesic          | 428-37-5   |      | C <sub>14</sub> H <sub>21</sub> NO                                            |
| Profexalone                | Sedative           | 34740-13-1 |      | C <sub>13</sub> H <sub>16</sub> N <sub>2</sub> O <sub>3</sub>                 |
| Proflazepam                | Anxiolytic         | 52829-30-8 |      | C <sub>18</sub> H <sub>16</sub> ClFN <sub>2</sub> O <sub>3</sub>              |
| Progabide                  | Anticonvulsant     | 62666-20-0 |      | C <sub>17</sub> H <sub>16</sub> ClFN <sub>2</sub> O <sub>2</sub>              |
| Progesterone               | Progestogen        | 57-83-0    | Y    | C <sub>21</sub> H <sub>30</sub> O <sub>2</sub>                                |
| Proglumetacin              | Antiinflammatory   | 57132-53-3 | Y    | C <sub>46</sub> H <sub>58</sub> ClN <sub>5</sub> O <sub>8</sub>               |
| Proglumide                 | Antiulcerative     | 6620-60-6  | Y    | C <sub>18</sub> H <sub>26</sub> N <sub>2</sub> O <sub>4</sub>                 |
| Proheptazine               | Analgesic          | 77-14-5    |      | C <sub>17</sub> H <sub>25</sub> NO <sub>2</sub>                               |
| Proligestone               | Progestogen        | 23873-85-0 |      | C <sub>24</sub> H <sub>34</sub> O <sub>4</sub>                                |
| Prolintane                 | Antidepressant     | 493-92-5   |      | C <sub>15</sub> H <sub>23</sub> N                                             |
| Promazine                  | Antipsychotic      | 58-40-2    |      | C <sub>17</sub> H <sub>20</sub> N <sub>2</sub> S                              |
| Promegestone               | Progestogen        | 34184-77-5 | Y    | C <sub>22</sub> H <sub>30</sub> O <sub>2</sub>                                |
| Promestriene               | Dermatologic       | 39219-28-8 |      | C <sub>22</sub> H <sub>32</sub> O <sub>2</sub>                                |
| Promethazine               | Antihistaminic     | 60-87-7    | Y    | C <sub>17</sub> H <sub>20</sub> N <sub>2</sub> S                              |
| Promethestrol Dipropionate | Estrogen           | 84-13-9    |      | C <sub>26</sub> H <sub>34</sub> O <sub>4</sub>                                |
| Promolate                  | Antitussive        | 3615-74-5  |      | C <sub>16</sub> H <sub>23</sub> NO <sub>4</sub>                               |
| Promoxolane                | Unclassified       | 470-43-9   |      | C <sub>10</sub> H <sub>20</sub> O <sub>3</sub>                                |
| Pronetalol                 | Antianginal        | 54-80-8    |      | C <sub>15</sub> H <sub>19</sub> NO                                            |
| Propacetamol               | Analgesic          | 66532-85-2 |      | C <sub>14</sub> H <sub>20</sub> N <sub>2</sub> O <sub>3</sub>                 |
| Propafenone                | Antiarrhythmic     | 54063-53-5 | Y    | C <sub>21</sub> H <sub>27</sub> NO <sub>3</sub>                               |
| Propamidine                | Antiprotozoal      | 104-32-5   |      | C <sub>17</sub> H <sub>20</sub> N <sub>4</sub> O <sub>2</sub>                 |
| Propanidid                 | Anesthetic         | 1421-14-3  |      | C <sub>18</sub> H <sub>27</sub> NO <sub>5</sub>                               |
| Propanocaine               | Anesthetic         | 493-76-5   |      | C <sub>20</sub> H <sub>25</sub> NO <sub>2</sub>                               |
| Propantheline              | Antispasmodic      | 298-50-0   | Y    | C <sub>23</sub> H <sub>30</sub> NO <sub>3</sub>                               |
| Proparacaine               | Anesthetic         | 499-67-2   |      | C <sub>16</sub> H <sub>26</sub> N <sub>2</sub> O <sub>3</sub>                 |
| Propatyl Nitrate           | Vasodilator        | 2921-92-8  |      | C <sub>6</sub> H <sub>11</sub> N <sub>3</sub> O <sub>9</sub>                  |
| Propentofylline            | Nootropic          | 55242-55-2 |      | C <sub>15</sub> H <sub>22</sub> N <sub>4</sub> O <sub>3</sub>                 |
| Propenzolate               | Mydriatic          | 4354-45-4  |      | C <sub>25</sub> H <sub>29</sub> NO <sub>3</sub>                               |
| Propetidine                | Analgesic          | 561-76-2   |      | C <sub>16</sub> H <sub>23</sub> NO <sub>2</sub>                               |
| Propetamide                | Antidiabetic       | 730-07-4   |      | C <sub>14</sub> H <sub>22</sub> N <sub>2</sub> O <sub>2</sub>                 |
| Propetandrol               | Steroid            | 3638-82-2  |      | C <sub>23</sub> H <sub>36</sub> O <sub>3</sub>                                |
| Propicillin                | Antibiotic         | 551-27-9   |      | C <sub>18</sub> H <sub>22</sub> N <sub>2</sub> O <sub>5</sub> S               |
| Propikacin                 | Antibacterial      | 66887-96-5 |      | C <sub>21</sub> H <sub>43</sub> N <sub>5</sub> O <sub>12</sub>                |
| Propinetidine              | Antiulcerative     | 3811-53-8  |      | C <sub>19</sub> H <sub>25</sub> NO <sub>2</sub>                               |
| Propiomazine               | Sedative           | 362-29-8   |      | C <sub>20</sub> H <sub>24</sub> N <sub>2</sub> OS                             |
| Propionic Acid             | Antifungal         | 79-09-4    |      | C <sub>3</sub> H <sub>6</sub> O <sub>2</sub>                                  |
| Propipocaine               | Anesthetic         | 3670-68-6  |      | C <sub>17</sub> H <sub>25</sub> NO <sub>2</sub>                               |
| Propiram Fumarate          | Analgesic          | 15686-91-6 |      | C <sub>16</sub> H <sub>25</sub> N <sub>3</sub> O                              |
| Propisergide               | Antimigraine       | 5793-04-4  |      | C <sub>20</sub> H <sub>25</sub> N <sub>3</sub> O <sub>2</sub>                 |
| Propiverine                | Antispasmodic      | 60569-19-9 | Y    | C <sub>23</sub> H <sub>29</sub> NO <sub>3</sub>                               |
| Propizepine                | Antidepressant     | 10321-12-7 |      | C <sub>17</sub> H <sub>20</sub> N <sub>4</sub> O                              |
| Propofol                   | Anesthetic         | 2078-54-8  |      | C <sub>12</sub> H <sub>18</sub> O                                             |

Table S1. Cont.

| Common Name           | Indication             | CAS Number  | Oral | Molecular Formula                                                             |
|-----------------------|------------------------|-------------|------|-------------------------------------------------------------------------------|
| Propoxate             | Antidepressant         | 7036-58-0   |      | C <sub>15</sub> H <sub>18</sub> N <sub>2</sub> O <sub>2</sub>                 |
| Propoxycaïne          | Anesthetic             | 86-43-1     |      | C <sub>16</sub> H <sub>26</sub> N <sub>2</sub> O <sub>3</sub>                 |
| Propoxyphene          | Analgesic              | 469-62-5    |      | C <sub>22</sub> H <sub>29</sub> NO <sub>2</sub>                               |
| Propranolol           | Antihypertensive       | 525-66-6    | Y    | C <sub>16</sub> H <sub>21</sub> NO <sub>2</sub>                               |
| Propylhexedrine       | Adrenergic             | 101-40-6    |      | C <sub>10</sub> H <sub>21</sub> N                                             |
| Propylthiouracil      | Thyroid                | 51-52-5     | Y    | C <sub>7</sub> H <sub>10</sub> N <sub>2</sub> OS                              |
| Propyperone           | Antipsychotic          | 3781-28-0   |      | C <sub>23</sub> H <sub>33</sub> FN <sub>2</sub> O <sub>2</sub>                |
| Propyphenazone        | Analgesic              | 479-92-5    |      | C <sub>14</sub> H <sub>18</sub> N <sub>2</sub> O                              |
| Propyromazine Bromide | Antispasmodic          | 145-54-0    |      | C <sub>20</sub> H <sub>23</sub> BrN <sub>2</sub> O <sub>5</sub>               |
| Proquazone            | Antiinflammatory       | 22760-18-5  |      | C <sub>18</sub> H <sub>18</sub> N <sub>2</sub> O                              |
| Proquinolate          | Antibacterial          | 1698-95-9   |      | C <sub>17</sub> H <sub>21</sub> NO <sub>5</sub>                               |
| Prorenoate Potassium  | Antihypertensive       | 49848-01-3  |      | C <sub>23</sub> H <sub>32</sub> O <sub>4</sub>                                |
| Proroxan              | Antihypertensive       | 33743-96-3  |      | C <sub>21</sub> H <sub>23</sub> NO <sub>3</sub>                               |
| Proscillaridin        | Cardiotonic            | 466-06-8    |      | C <sub>30</sub> H <sub>42</sub> O <sub>8</sub>                                |
| Prospidium Chloride   | Antineoplastic         | 23476-83-7  |      | C <sub>18</sub> H <sub>36</sub> Cl <sub>4</sub> N <sub>4</sub> O <sub>2</sub> |
| Prostalene            | Prostaglandin          | 54120-61-5  |      | C <sub>22</sub> H <sub>36</sub> O <sub>5</sub>                                |
| Prosulpride           | Antipsychotic          | 68556-59-2  |      | C <sub>16</sub> H <sub>25</sub> N <sub>3</sub> O <sub>4</sub> S               |
| Protein Hydrolysate   | Plasma Volume Expander | 852812-98-7 |      | C <sub>35</sub> H <sub>47</sub> N <sub>7</sub> O <sub>10</sub>                |
| Proterguride          | Antipsychotic          | 77650-95-4  |      | C <sub>22</sub> H <sub>32</sub> N <sub>4</sub> O                              |
| Protheobromine        | Diuretic               | 50-39-5     |      | C <sub>10</sub> H <sub>14</sub> N <sub>4</sub> O <sub>3</sub>                 |
| Prothipendyl          | Antipsychotic          | 303-69-5    |      | C <sub>16</sub> H <sub>19</sub> N <sub>3</sub> S                              |
| Prothixene            | Antipsychotic          | 2622-24-4   |      | C <sub>18</sub> H <sub>19</sub> NS                                            |
| Protiofate            | Antibiotic             | 58416-00-5  |      | C <sub>12</sub> H <sub>16</sub> O <sub>6</sub> S                              |
| Protionamide          | Antibacterial          | 14222-60-7  |      | C <sub>9</sub> H <sub>12</sub> N <sub>2</sub> S                               |
| Protirelin            | Pituitary              | 24305-27-9  |      | C <sub>16</sub> H <sub>22</sub> N <sub>6</sub> O <sub>4</sub>                 |
| Protizinic Acid       | Antiinflammatory       | 13799-03-6  |      | C <sub>17</sub> H <sub>17</sub> NO <sub>3</sub> S                             |
| Protokylol            | Bronchodilator         | 136-70-9    |      | C <sub>18</sub> H <sub>21</sub> NO <sub>5</sub>                               |
| Protoporphyrin IX     | Hepatic Protectant     | 553-12-8    |      | C <sub>34</sub> H <sub>34</sub> N <sub>4</sub> O <sub>4</sub>                 |
| Protoveratrine A      | Antihypertensive       | 143-57-7    |      | C <sub>41</sub> H <sub>63</sub> NO <sub>14</sub>                              |
| Protoveratrine B      | Antihypertensive       | 124-97-0    |      | C <sub>41</sub> H <sub>63</sub> NO <sub>15</sub>                              |
| Protriptyline         | Antidepressant         | 438-60-8    | Y    | C <sub>19</sub> H <sub>21</sub> N                                             |
| Proxazole             | Muscle Relaxant        | 5696-09-3   |      | C <sub>17</sub> H <sub>25</sub> N <sub>3</sub> O                              |
| Proxibarbal           | Sedative               | 2537-29-3   |      | C <sub>10</sub> H <sub>14</sub> N <sub>2</sub> O <sub>4</sub>                 |
| Proxibutene           | Analgesic              | 14089-84-0  |      | C <sub>22</sub> H <sub>27</sub> NO <sub>2</sub>                               |
| Proxicromil           | Antihistaminic         | 60400-92-2  |      | C <sub>17</sub> H <sub>18</sub> O <sub>5</sub>                                |
| Proxorphan Tartrate   | Analgesic              | 69815-38-9  |      | C <sub>19</sub> H <sub>25</sub> NO <sub>2</sub>                               |
| Proxyphylline         | Bronchodilator         | 603-00-9    |      | C <sub>10</sub> H <sub>14</sub> N <sub>4</sub> O <sub>3</sub>                 |
| Prozapine             | Antispasmodic          | 3426-08-2   |      | C <sub>21</sub> H <sub>27</sub> N                                             |
| Prucalopride          | Gastroprokinetic       | 179474-81-8 | Y    | C <sub>18</sub> H <sub>26</sub> ClN <sub>3</sub> O <sub>3</sub>               |
| Prulifloxacin         | Antibacterial          | 123447-62-1 | Y    | C <sub>21</sub> H <sub>20</sub> FN <sub>3</sub> O <sub>6</sub> S              |
| Pruvanserin           | Antidepressant         | 443144-26-1 |      | C <sub>22</sub> H <sub>21</sub> FN <sub>4</sub> O                             |
| Pseudoephedrine       | Decongestant           | 90-82-4     | Y    | C <sub>10</sub> H <sub>15</sub> NO                                            |
| Psilocybine           | Antipsychotic          | 520-52-5    |      | C <sub>12</sub> H <sub>17</sub> N <sub>2</sub> O <sub>4</sub> P               |
| Pteropterin           | Unclassified           | 89-38-3     |      | C <sub>29</sub> H <sub>33</sub> N <sub>9</sub> O <sub>12</sub>                |
| Pumafentrine          | Antimalarial           | 207993-12-2 |      | C <sub>29</sub> H <sub>39</sub> N <sub>3</sub> O <sub>3</sub>                 |
| Pumaprazole           | Antiulcerative         | 158364-59-1 |      | C <sub>19</sub> H <sub>22</sub> N <sub>4</sub> O <sub>2</sub>                 |
| Pumitepa              | Antineoplastic         | 42061-52-9  |      | C <sub>12</sub> H <sub>19</sub> N <sub>8</sub> OP                             |
| Pumosetrag            | Gastroprokinetic       | 153062-94-3 |      | C <sub>15</sub> H <sub>17</sub> N <sub>3</sub> O <sub>2</sub> S               |
| Puromycin             | Antineoplastic         | 53-79-2     |      | C <sub>22</sub> H <sub>29</sub> N <sub>7</sub> O <sub>5</sub>                 |
| Pyrabrom              | Antihistaminic         | 606-05-3    |      | C <sub>24</sub> H <sub>30</sub> BrN <sub>7</sub> O <sub>3</sub>               |
| Pyrantel              | Anthelmintic           | 15686-83-6  | Y    | C <sub>11</sub> H <sub>14</sub> N <sub>2</sub> S                              |
| Pyraethiazine         | Anthelmintic           | 84-08-2     |      | C <sub>18</sub> H <sub>20</sub> N <sub>2</sub> S                              |
| Pyrazinamide          | Antibacterial          | 98-96-4     | Y    | C <sub>5</sub> H <sub>5</sub> N <sub>3</sub> O                                |
| Pyrazofurin           | Antineoplastic         | 30868-30-5  |      | C <sub>9</sub> H <sub>13</sub> N <sub>3</sub> O <sub>6</sub>                  |
| Pyricarbate           | Glucocorticoid         | 1882-26-4   |      | C <sub>11</sub> H <sub>15</sub> N <sub>3</sub> O <sub>4</sub>                 |
| Pyridarone            | Antiarrhythmic         | 7035-04-3   |      | C <sub>13</sub> H <sub>9</sub> NO                                             |
| Pyridofylline         | Vasodilator            | 53403-96-6  |      | C <sub>9</sub> H <sub>12</sub> N <sub>4</sub> O <sub>6</sub> S                |
| Pyridofylline         | Vasodilator            | 65-23-6     |      | C <sub>8</sub> H <sub>11</sub> NO <sub>3</sub>                                |
| Pyridostigmine        | Cholinergic            | 155-97-5    | Y    | C <sub>9</sub> H <sub>13</sub> N <sub>2</sub> O <sub>2</sub>                  |
| Pyrilamine            | Antihistaminic         | 91-84-9     |      | C <sub>17</sub> H <sub>23</sub> N <sub>3</sub> O                              |
| Pyrimethamine         | Antimalarial           | 58-14-0     | Y    | C <sub>12</sub> H <sub>13</sub> ClN <sub>4</sub>                              |
| Pyrinoline            | Antiarrhythmic         | 1740-22-3   |      | C <sub>27</sub> H <sub>20</sub> N <sub>4</sub> O                              |
| Pyrrithione           | Antibacterial          | 1121-30-8   |      | C <sub>5</sub> H <sub>5</sub> NOS                                             |

Table S1. Cont.

| Common Name            | Indication                   | CAS Number  | Oral | Molecular Formula                                                            |
|------------------------|------------------------------|-------------|------|------------------------------------------------------------------------------|
| Pyrithoxin             | Nootropic                    | 1098-97-1   |      | C <sub>16</sub> H <sub>20</sub> N <sub>2</sub> O <sub>4</sub> S <sub>2</sub> |
| Pyrithyldione          | Sedative                     | 77-04-3     |      | C <sub>9</sub> H <sub>13</sub> NO <sub>2</sub>                               |
| Pyritidium             | Antiprotozoal                | 3616-05-5   |      | C <sub>25</sub> H <sub>24</sub> N <sub>7</sub>                               |
| Pyrogallol             | Neuromuscular Blocking Agent | 87-66-1     |      | C <sub>6</sub> H <sub>6</sub> O <sub>3</sub>                                 |
| Pyrovalerone           | Nootropic                    | 3563-49-3   |      | C <sub>16</sub> H <sub>23</sub> NO                                           |
| Pyroxamine Maleate     | Antihistaminic               | 7009-68-9   |      | C <sub>18</sub> H <sub>20</sub> ClNO                                         |
| Pyrobutamine Phosphate | Antihistaminic               | 91-82-7     |      | C <sub>20</sub> H <sub>22</sub> ClN                                          |
| Pyrocaine              | Anesthetic                   | 2210-77-7   |      | C <sub>14</sub> H <sub>20</sub> N <sub>2</sub> O                             |
| Pyrrroliphen           | Analgesic                    | 15686-97-2  |      | C <sub>23</sub> H <sub>29</sub> NO <sub>2</sub>                              |
| Pyrrrolnitrin          | Antifungal                   | 1018-71-9   |      | C <sub>10</sub> H <sub>6</sub> Cl <sub>2</sub> N <sub>2</sub> O <sub>2</sub> |
| Pytamine               | Antidepressant               | 15301-88-9  |      | C <sub>20</sub> H <sub>28</sub> N <sub>2</sub> O                             |
| Quadazocine Mesylate   | Analgesic                    | 71276-43-2  |      | C <sub>25</sub> H <sub>37</sub> NO <sub>2</sub>                              |
| Quadrosilan            | Unclassified                 | 33204-76-1  |      | C <sub>18</sub> H <sub>28</sub> O <sub>4</sub> Si <sub>4</sub>               |
| Quatacaine             | Anesthetic                   | 17692-45-4  |      | C <sub>14</sub> H <sub>22</sub> N <sub>2</sub> O                             |
| Quazepam               | Sedative                     | 36735-22-5  | Y    | C <sub>17</sub> H <sub>11</sub> ClF <sub>4</sub> N <sub>2</sub> S            |
| Quazinone              | Cardiotonic                  | 70018-51-8  |      | C <sub>11</sub> H <sub>10</sub> ClN <sub>3</sub> O                           |
| Quazodine              | Cardiotonic                  | 4015-32-1   |      | C <sub>12</sub> H <sub>14</sub> N <sub>2</sub> O <sub>2</sub>                |
| Quazolast              | Bronchodilator               | 86048-40-0  |      | C <sub>12</sub> H <sub>7</sub> ClN <sub>2</sub> O <sub>3</sub>               |
| Quercetin              | Capillary Protectant         | 117-39-5    | Y    | C <sub>15</sub> H <sub>10</sub> O <sub>7</sub>                               |
| Quetiapine             | Antipsychotic                | 111974-69-7 | Y    | C <sub>21</sub> H <sub>25</sub> N <sub>3</sub> O <sub>2</sub> S              |
| Quifenadine            | Antihistaminic               | 10447-39-9  |      | C <sub>20</sub> H <sub>23</sub> NO                                           |
| Quiflapon Sodium       | Antiinflammatory             | 136668-42-3 |      | C <sub>34</sub> H <sub>35</sub> ClN <sub>2</sub> O <sub>5</sub> S            |
| Quillifoline           | Antibacterial                | 15301-89-0  |      | C <sub>21</sub> H <sub>24</sub> ClNO <sub>2</sub>                            |
| Quilostigmine          | Cholinergic                  | 139314-01-5 |      | C <sub>23</sub> H <sub>27</sub> N <sub>3</sub> O <sub>2</sub>                |
| Quinacainol            | Antiarrhythmic               | 86073-85-0  |      | C <sub>21</sub> H <sub>30</sub> N <sub>2</sub> O                             |
| Quinacillin            | Antibiotic                   | 1596-63-0   |      | C <sub>18</sub> H <sub>16</sub> N <sub>4</sub> O <sub>6</sub> S              |
| Quinacrine             | Antimalarial                 | 83-89-6     | Y    | C <sub>23</sub> H <sub>30</sub> ClN <sub>3</sub> O                           |
| Quinagolide            | Antipsychotic                | 87056-78-8  | Y    | C <sub>20</sub> H <sub>33</sub> N <sub>3</sub> O <sub>3</sub> S              |
| Quinaldine Blue        | Antineoplastic               | 2768-90-3   |      | C <sub>25</sub> H <sub>25</sub> N <sub>2</sub> Cl                            |
| Quinapril              | Antihypertensive             | 85441-61-8  | Y    | C <sub>25</sub> H <sub>30</sub> N <sub>2</sub> O <sub>5</sub>                |
| Quinaprilat            | Antihypertensive             | 82768-85-2  | Y    | C <sub>23</sub> H <sub>26</sub> N <sub>2</sub> O <sub>5</sub>                |
| Quinazosin             | Antihypertensive             | 15793-38-1  |      | C <sub>17</sub> H <sub>23</sub> N <sub>5</sub> O <sub>2</sub>                |
| Quinbolone             | Steroid                      | 2487-63-0   |      | C <sub>24</sub> H <sub>32</sub> O <sub>2</sub>                               |
| Quincarbonate          | Urologic                     | 54340-59-9  |      | C <sub>17</sub> H <sub>18</sub> ClNO <sub>6</sub>                            |
| Quindecamine Acetate   | Antibacterial                | 19056-26-9  |      | C <sub>30</sub> H <sub>38</sub> N <sub>4</sub>                               |
| Quindonium Bromide     | Antiarrhythmic               | 130-81-4    |      | C <sub>16</sub> H <sub>20</sub> NO.Br                                        |
| Quindoxin              | Antibacterial                | 2423-66-7   |      | C <sub>8</sub> H <sub>6</sub> N <sub>2</sub> O <sub>2</sub>                  |
| Quinelorane            | Antihypertensive             | 97466-90-5  |      | C <sub>14</sub> H <sub>22</sub> N <sub>4</sub>                               |
| Quinestradol           | Estrogen                     | 1169-79-5   |      | C <sub>23</sub> H <sub>32</sub> O <sub>3</sub>                               |
| Quinestrol             | Estrogen                     | 152-43-2    |      | C <sub>25</sub> H <sub>32</sub> O <sub>2</sub>                               |
| Quinethazone           | Diuretic                     | 73-49-4     |      | C <sub>10</sub> H <sub>12</sub> ClN <sub>3</sub> O <sub>3</sub> S            |
| Quinetolate            | Muscle Relaxant              | 27166-18-3  |      | C <sub>14</sub> H <sub>19</sub> N <sub>3</sub> O                             |
| Quinetolate            | Muscle Relaxant              | 131-64-6    |      | C <sub>12</sub> H <sub>19</sub> NO <sub>3</sub>                              |
| Quinezamide            | Antidiabetic                 | 77197-48-9  |      | C <sub>13</sub> H <sub>12</sub> N <sub>4</sub> O                             |
| Quinfamide             | Antiamebic                   | 62265-68-3  |      | C <sub>16</sub> H <sub>13</sub> Cl <sub>2</sub> NO <sub>4</sub>              |
| Quingestanol Acetate   | Progestogen                  | 3000-39-3   |      | C <sub>27</sub> H <sub>36</sub> O <sub>3</sub>                               |
| Quingestrone           | Progestogen                  | 67-95-8     |      | C <sub>26</sub> H <sub>38</sub> O <sub>2</sub>                               |
| Quinidine              | Antimalarial                 | 56-54-2     | Y    | C <sub>20</sub> H <sub>24</sub> N <sub>2</sub> O <sub>2</sub>                |
| Quinine                | Antimalarial                 | 130-95-0    | Y    | C <sub>20</sub> H <sub>24</sub> N <sub>2</sub> O <sub>2</sub>                |
| Quinocide              | Antimalarial                 | 525-61-1    |      | C <sub>15</sub> H <sub>21</sub> N <sub>3</sub> O                             |
| Quinpirole             | Antihypertensive             | 80373-22-4  |      | C <sub>13</sub> H <sub>21</sub> N <sub>3</sub>                               |
| Quinterenol Sulfate    | Bronchodilator               | 13757-97-6  |      | C <sub>14</sub> H <sub>18</sub> N <sub>2</sub> O <sub>2</sub>                |
| Quintiofos             | Ectoparasiticide             | 1776-83-6   |      | C <sub>17</sub> H <sub>16</sub> NO <sub>2</sub> PS                           |
| Quinuclium Bromide     | Antihypertensive             | 35425-83-3  |      | C <sub>14</sub> H <sub>18</sub> BrNO                                         |
| Quinupramine           | Antidepressant               | 31721-17-2  |      | C <sub>21</sub> H <sub>24</sub> N <sub>2</sub>                               |
| Quipazine Maleate      | Antidepressant               | 4774-24-7   |      | C <sub>13</sub> H <sub>15</sub> N <sub>3</sub>                               |
| Qisultazine            | Antidepressant               | 64099-44-1  |      | C <sub>21</sub> H <sub>25</sub> N <sub>3</sub> O <sub>2</sub> S <sub>2</sub> |
| Rabeprazole            | Antilucerative               | 117976-89-3 | Y    | C <sub>18</sub> H <sub>21</sub> N <sub>3</sub> O <sub>3</sub> S              |
| Racecadotril           | Antidiarrheal                | 81110-73-8  | Y    | C <sub>21</sub> H <sub>23</sub> NO <sub>4</sub> S                            |
| Racefemine             | Antispasmodic                | 22232-57-1  |      | C <sub>18</sub> H <sub>23</sub> NO                                           |
| Racemethol             | Decongestant                 | 89-78-1     |      | C <sub>10</sub> H <sub>20</sub> O                                            |
| Racemethorphan         | Antitussive                  | 510-53-2    |      | C <sub>18</sub> H <sub>25</sub> NO                                           |

Table S1. Cont.

| Common Name         | Indication                   | CAS Number  | Oral | Molecular Formula                                                               |
|---------------------|------------------------------|-------------|------|---------------------------------------------------------------------------------|
| Racemetirosine      | Unclassified                 | 658-48-0    |      | C <sub>10</sub> H <sub>13</sub> NO <sub>3</sub>                                 |
| Racemoramide        | Analgesic                    | 545-59-5    |      | C <sub>25</sub> H <sub>32</sub> N <sub>2</sub> O <sub>2</sub>                   |
| Racemorphan         | Analgesic                    | 297-90-5    |      | C <sub>17</sub> H <sub>23</sub> NO                                              |
| Racephedrine        | Bronchodilator               | 90-81-3     |      | C <sub>10</sub> H <sub>15</sub> NO                                              |
| Racephenicol        | Antibacterial                | 847-25-6    |      | C <sub>12</sub> H <sub>15</sub> Cl <sub>2</sub> NO <sub>5</sub> S               |
| Racepinephrine      | Bronchodilator               | 329-65-7    |      | C <sub>9</sub> H <sub>13</sub> NO <sub>3</sub>                                  |
| Ractopamine         | Steroid                      | 97825-25-7  |      | C <sub>18</sub> H <sub>23</sub> NO <sub>3</sub>                                 |
| Radafaxine          | Antidepressant               | 192374-14-4 |      | C <sub>13</sub> H <sub>18</sub> ClNO <sub>2</sub>                               |
| Rafabegron          | Antidiabetic                 | 244081-42-3 |      | C <sub>21</sub> H <sub>23</sub> ClN <sub>2</sub> O <sub>4</sub>                 |
| Rafoxanide          | Anthelminthic                | 22662-39-1  |      | C <sub>19</sub> H <sub>11</sub> Cl <sub>2</sub> I <sub>2</sub> NO <sub>3</sub>  |
| Ragaglitazar        | Antidiabetic                 | 222834-30-2 |      | C <sub>25</sub> H <sub>25</sub> NO <sub>5</sub>                                 |
| Ralitoline          | Anticonvulsant               | 93738-40-0  |      | C <sub>13</sub> H <sub>13</sub> ClN <sub>2</sub> O <sub>2</sub> S               |
| Raloxifene          | Bone Resorption Inhibitor    | 84449-90-1  | Y    | C <sub>28</sub> H <sub>27</sub> NO <sub>4</sub> S                               |
| Raltitrexed         | Antineoplastic               | 112887-68-0 |      | C <sub>21</sub> H <sub>22</sub> N <sub>4</sub> O <sub>6</sub> S                 |
| Raluridine          | Antiviral                    | 119644-22-3 |      | C <sub>9</sub> H <sub>10</sub> ClFN <sub>2</sub> O <sub>4</sub>                 |
| Ramatroban          | Antithrombotic               | 116649-85-5 | Y    | C <sub>21</sub> H <sub>21</sub> FN <sub>2</sub> O <sub>4</sub> S                |
| Ramciclane          | Antihypotensive              | 96743-96-3  |      | C <sub>21</sub> H <sub>33</sub> NO                                              |
| Ramelteon           | Anxiolytic                   | 196597-26-9 | Y    | C <sub>16</sub> H <sub>21</sub> NO <sub>2</sub>                                 |
| Ramifenazone        | Analgesic                    | 3615-24-5   |      | C <sub>14</sub> H <sub>19</sub> N <sub>3</sub> O                                |
| Ramipril            | Antihypertensive             | 87333-19-5  | Y    | C <sub>23</sub> H <sub>32</sub> N <sub>2</sub> O <sub>5</sub>                   |
| Ramiprilat          | Antihypertensive             | 87269-97-4  | Y    | C <sub>21</sub> H <sub>28</sub> N <sub>2</sub> O <sub>5</sub>                   |
| Ramixotidine        | Antilucerative               | 84071-15-8  |      | C <sub>16</sub> H <sub>21</sub> N <sub>3</sub> O <sub>3</sub> S                 |
| Ramnodigin          | Cardiotonic                  | 33156-28-4  |      | C <sub>29</sub> H <sub>44</sub> O <sub>6</sub>                                  |
| Ramosetron          | Antidepressant               | 132036-88-5 | Y    | C <sub>17</sub> H <sub>17</sub> N <sub>3</sub> O                                |
| Ranelic Acid        | Bone Resorption Inhibitor    | 135459-90-4 |      | C <sub>12</sub> H <sub>10</sub> N <sub>2</sub> O <sub>8</sub> S                 |
| Ranimustine         | Antineoplastic               | 58994-96-0  |      | C <sub>10</sub> H <sub>18</sub> ClN <sub>3</sub> O <sub>7</sub>                 |
| Ranirestat          | Antidiabetic                 | 147254-64-6 | Y    | C <sub>17</sub> H <sub>11</sub> BrFN <sub>3</sub> O <sub>4</sub>                |
| Ranitidine          | Antilucerative               | 66357-35-5  | Y    | C <sub>13</sub> H <sub>22</sub> N <sub>4</sub> O <sub>3</sub> S                 |
| Ranolazine          | Antianginal                  | 95635-55-5  | Y    | C <sub>24</sub> H <sub>33</sub> N <sub>3</sub> O <sub>4</sub>                   |
| Rapacuronium        | Neuromuscular Blocking Agent | 465499-11-0 |      | C <sub>37</sub> H <sub>61</sub> N <sub>2</sub> O <sub>4</sub>                   |
| Rasagiline Mesylate | Antiparkinsonian             | 136236-51-6 | Y    | C <sub>12</sub> H <sub>13</sub> N                                               |
| Rathyronine         | Thyroid                      | 3130-96-9   |      | C <sub>15</sub> H <sub>12</sub> I <sub>3</sub> NO <sub>4</sub>                  |
| Ravuconazole        | Antifungal                   | 182760-06-1 |      | C <sub>22</sub> H <sub>17</sub> F <sub>2</sub> N <sub>5</sub> OS                |
| Raxofelast          | Hepatic Protectant           | 128232-14-4 |      | C <sub>15</sub> H <sub>18</sub> O <sub>5</sub>                                  |
| Razaxaban           | Anticoagulant                | 218298-21-6 |      | C <sub>24</sub> H <sub>20</sub> F <sub>4</sub> N <sub>8</sub> O <sub>2</sub>    |
| Razindolil          | Cardiotonic                  | 30271-85-3  |      | C <sub>27</sub> H <sub>34</sub> N <sub>4</sub> O <sub>10</sub>                  |
| Razobazam           | Anxiolytic                   | 78466-98-5  |      | C <sub>14</sub> H <sub>14</sub> N <sub>4</sub> O <sub>2</sub>                   |
| Razoxane            | Antianginal                  | 21416-67-1  |      | C <sub>11</sub> H <sub>16</sub> N <sub>4</sub> O <sub>4</sub>                   |
| Rebamipide          | Antilucerative               | 90098-04-7  | Y    | C <sub>19</sub> H <sub>15</sub> ClN <sub>2</sub> O <sub>4</sub>                 |
| Rebimastat          | Antineoplastic               | 259188-38-0 |      | C <sub>23</sub> H <sub>41</sub> N <sub>5</sub> O <sub>5</sub> S                 |
| Reboxetine          | Antidepressant               | 71620-89-8  | Y    | C <sub>19</sub> H <sub>23</sub> NO <sub>3</sub>                                 |
| Recainam            | Antiarrhythmic               | 74738-24-2  |      | C <sub>15</sub> H <sub>25</sub> N <sub>3</sub> O                                |
| Reclazepam          | Sedative                     | 76053-16-2  |      | C <sub>18</sub> H <sub>13</sub> Cl <sub>2</sub> N <sub>3</sub> O <sub>2</sub>   |
| Regadenoson         | Vasodilator                  | 313348-27-5 |      | C <sub>15</sub> H <sub>18</sub> N <sub>8</sub> O <sub>5</sub>                   |
| Reglitazar          | Antidiabetic                 | 170861-63-9 |      | C <sub>22</sub> H <sub>20</sub> N <sub>2</sub> O <sub>5</sub>                   |
| Relcovaptan         | Antihypertensive             | 150375-75-0 |      | C <sub>28</sub> H <sub>27</sub> Cl <sub>2</sub> N <sub>3</sub> O <sub>7</sub> S |
| Relomycin           | Antibacterial                | 1404-48-4   |      | C <sub>46</sub> H <sub>79</sub> NO <sub>17</sub>                                |
| Remacemide          | Anticonvulsant               | 128298-28-2 |      | C <sub>17</sub> H <sub>20</sub> N <sub>2</sub> O                                |
| Remifentanyl        | Analgesic                    | 132875-61-7 |      | C <sub>20</sub> H <sub>28</sub> N <sub>2</sub> O <sub>5</sub>                   |
| Remikiren           | Antihypertensive             | 126222-34-2 |      | C <sub>33</sub> H <sub>50</sub> N <sub>4</sub> O <sub>6</sub> S                 |
| Remiprostol         | Antilucerative               | 110845-89-1 |      | C <sub>25</sub> H <sub>36</sub> O <sub>5</sub>                                  |
| Remoxipride         | Antipsychotic                | 80125-14-0  | Y    | C <sub>16</sub> H <sub>23</sub> BrN <sub>2</sub> O <sub>3</sub>                 |
| Renanolone          | Antiinflammatory             | 565-99-1    |      | C <sub>21</sub> H <sub>32</sub> O <sub>3</sub>                                  |
| Rentiapril          | Antihypertensive             | 80830-42-8  |      | C <sub>13</sub> H <sub>15</sub> NO <sub>4</sub> S <sub>2</sub>                  |
| Renzapride          | Gastroprokinetic             | 112727-80-7 |      | C <sub>16</sub> H <sub>22</sub> ClN <sub>3</sub> O <sub>2</sub>                 |
| Repagermanium       | Immunomodulator              | 12758-40-6  |      | C <sub>6</sub> H <sub>10</sub> Ge <sub>2</sub> O <sub>7</sub>                   |
| Repaglinide         | Antidiabetic                 | 135062-02-1 | Y    | C <sub>27</sub> H <sub>36</sub> N <sub>2</sub> O <sub>4</sub>                   |
| Reparixin           | Analgesic                    | 266359-83-5 | Y    | C <sub>14</sub> H <sub>21</sub> NO <sub>3</sub> S                               |
| Repinotan           | Nootropic                    | 144980-29-0 |      | C <sub>21</sub> H <sub>24</sub> N <sub>2</sub> O <sub>4</sub> S                 |
| Repirinast          | Antihistaminic               | 73080-51-0  |      | C <sub>20</sub> H <sub>21</sub> NO <sub>5</sub>                                 |
| Repromicin          | Antibacterial                | 56689-42-0  |      | C <sub>31</sub> H <sub>51</sub> NO <sub>8</sub>                                 |
| Reproterol          | Bronchodilator               | 54063-54-6  |      | C <sub>18</sub> H <sub>23</sub> N <sub>5</sub> O <sub>5</sub>                   |

Table S1. Cont.

| Common Name             | Indication                | CAS Number  | Oral | Molecular Formula                                                                               |
|-------------------------|---------------------------|-------------|------|-------------------------------------------------------------------------------------------------|
| Rescimetol              | Antihypertensive          | 73573-42-9  |      | C <sub>33</sub> H <sub>38</sub> N <sub>2</sub> O <sub>8</sub>                                   |
| Rescinamine             | Antihypertensive          | 24815-24-5  |      | C <sub>35</sub> H <sub>42</sub> N <sub>2</sub> O <sub>9</sub>                                   |
| Reserpine               | Antihypertensive          | 50-55-5     |      | C <sub>33</sub> H <sub>40</sub> N <sub>2</sub> O <sub>9</sub>                                   |
| Resiquimod              | Antiviral                 | 144875-48-9 |      | C <sub>17</sub> H <sub>22</sub> N <sub>4</sub> O <sub>2</sub>                                   |
| Resocortol Butyrate     | Antiinflammatory          | 76738-96-0  |      | C <sub>26</sub> H <sub>38</sub> O <sub>5</sub>                                                  |
| Resorantel              | Anthelmintic              | 20788-07-2  |      | C <sub>13</sub> H <sub>10</sub> BrNO <sub>3</sub>                                               |
| Resorcin Brown          | Anthelmintic              | 30282-44-1  |      | C <sub>20</sub> H <sub>18</sub> N <sub>4</sub> O <sub>5</sub> S                                 |
| Retapamulin             | Antibiotic                | 224452-66-8 |      | C <sub>30</sub> H <sub>47</sub> NO <sub>4</sub> S                                               |
| Retelliptine            | Antineoplastic            | 72238-02-9  |      | C <sub>25</sub> H <sub>32</sub> N <sub>4</sub> O                                                |
| Retigabine              | Anticonvulsant            | 150812-12-7 | Y    | C <sub>16</sub> H <sub>18</sub> FN <sub>3</sub> O <sub>2</sub>                                  |
| Revaprazan              | Antiulcerative            | 199463-33-7 | Y    | C <sub>22</sub> H <sub>23</sub> FN <sub>4</sub>                                                 |
| Revatropate             | Bronchodilator            | 149926-91-0 |      | C <sub>19</sub> H <sub>27</sub> NO <sub>4</sub> S                                               |
| Revenast                | Bronchodilator            | 85673-87-6  |      | C <sub>27</sub> H <sub>29</sub> N <sub>5</sub> O                                                |
| Revizinone              | Cardiotonic               | 133718-29-3 |      | C <sub>26</sub> H <sub>29</sub> N <sub>5</sub> O <sub>3</sub>                                   |
| Revospirone             | Anxiolytic                | 95847-87-3  |      | C <sub>18</sub> H <sub>21</sub> N <sub>5</sub> O <sub>3</sub> S                                 |
| Ribavirin               | Antiviral                 | 36791-04-5  | Y    | C <sub>8</sub> H <sub>12</sub> N <sub>4</sub> O <sub>5</sub>                                    |
| Riboprine               | Antineoplastic            | 7724-76-7   |      | C <sub>15</sub> H <sub>21</sub> N <sub>5</sub> O <sub>4</sub>                                   |
| Ribostamycin            | Antibiotic                | 25546-65-0  |      | C <sub>17</sub> H <sub>34</sub> N <sub>4</sub> O <sub>10</sub>                                  |
| Ricasetron              | Antiemetic                | 117086-68-7 |      | C <sub>19</sub> H <sub>27</sub> N <sub>3</sub> O                                                |
| Ricinolsulfuric Acid    | Unclassified              | 36634-48-7  |      | C <sub>18</sub> H <sub>34</sub> O <sub>6</sub> S                                                |
| Ridazolol               | Antihypertensive          | 83395-21-5  |      | C <sub>15</sub> H <sub>18</sub> Cl <sub>2</sub> N <sub>4</sub> O <sub>3</sub>                   |
| Ridogrel                | Antithrombotic            | 110140-89-1 |      | C <sub>18</sub> H <sub>17</sub> F <sub>3</sub> N <sub>2</sub> O <sub>3</sub>                    |
| Rifabutin               | Antibacterial             | 72559-06-9  | Y    | C <sub>46</sub> H <sub>62</sub> N <sub>4</sub> O <sub>11</sub>                                  |
| Rifalazil               | Antibacterial             | 129791-92-0 | Y    | C <sub>51</sub> H <sub>64</sub> N <sub>4</sub> O <sub>13</sub>                                  |
| Rifametane              | Antibacterial             | 94168-98-6  |      | C <sub>44</sub> H <sub>60</sub> N <sub>4</sub> O <sub>12</sub>                                  |
| Rifamexil               | Antibacterial             | 113102-19-5 |      | C <sub>42</sub> H <sub>55</sub> N <sub>3</sub> O <sub>11</sub> S                                |
| Rifamide                | Antibacterial             | 2750-76-7   |      | C <sub>43</sub> H <sub>58</sub> N <sub>2</sub> O <sub>13</sub>                                  |
| Rifampin                | Antibacterial             | 13292-46-1  |      | C <sub>43</sub> H <sub>58</sub> N <sub>4</sub> O <sub>12</sub>                                  |
| Rifamycin               | Antibiotic                | 6998-60-3   | Y    | C <sub>37</sub> H <sub>47</sub> NO <sub>12</sub>                                                |
| Rifapentine             | Antibacterial             | 61379-65-5  | Y    | C <sub>47</sub> H <sub>64</sub> N <sub>4</sub> O <sub>12</sub>                                  |
| Rifaximin               | Antibacterial             | 80621-81-4  | Y    | C <sub>43</sub> H <sub>51</sub> N <sub>3</sub> O <sub>11</sub>                                  |
| Rilapine                | Antipsychotic             | 79781-95-6  |      | C <sub>22</sub> H <sub>20</sub> ClN <sub>3</sub>                                                |
| Rilapladib              | Antihyperlipidemic        | 412950-08-4 | Y    | C <sub>40</sub> H <sub>38</sub> F <sub>5</sub> N <sub>3</sub> O <sub>5</sub> S                  |
| Rilmakalim              | Antihypertensive          | 132014-21-2 |      | C <sub>21</sub> H <sub>23</sub> NO <sub>5</sub> S                                               |
| Rilmazafone             | Sedative                  | 99593-25-6  | Y    | C <sub>21</sub> H <sub>20</sub> Cl <sub>2</sub> N <sub>6</sub> O <sub>3</sub>                   |
| Rilmenidine             | Antihypertensive          | 54187-04-1  | Y    | C <sub>10</sub> H <sub>16</sub> N <sub>2</sub> O                                                |
| Rilopirox               | Antifungal                | 104153-37-9 |      | C <sub>19</sub> H <sub>16</sub> ClNO <sub>4</sub>                                               |
| Rilozarone              | Antiarrhythmic            | 79282-39-6  |      | C <sub>32</sub> H <sub>36</sub> BrClN <sub>2</sub> O <sub>2</sub>                               |
| Rilpivirine             | Antiviral                 | 500287-72-9 | Y    | C <sub>22</sub> H <sub>18</sub> N <sub>6</sub>                                                  |
| Riluzole                | Nootropic                 | 1744-22-5   | Y    | C <sub>8</sub> H <sub>5</sub> F <sub>3</sub> N <sub>2</sub> OS                                  |
| Rimacalib               | Unclassified              | 215174-50-8 |      | C <sub>22</sub> H <sub>23</sub> FN <sub>4</sub> O <sub>2</sub>                                  |
| Rimantadine             | Antiviral                 | 13392-28-4  | Y    | C <sub>12</sub> H <sub>21</sub> N                                                               |
| Rimazolium Metilsulfate | Analgesic                 | 28610-84-6  |      | C <sub>13</sub> H <sub>19</sub> N <sub>2</sub> O <sub>3</sub> ·CH <sub>3</sub> O <sub>4</sub> S |
| Rimcazole               | Antipsychotic             | 75859-04-0  |      | C <sub>21</sub> H <sub>27</sub> N <sub>3</sub>                                                  |
| Rimeporide              | Cardiotonic               | 187870-78-6 |      | C <sub>11</sub> H <sub>15</sub> N <sub>3</sub> O <sub>5</sub> S <sub>2</sub>                    |
| Rimexolone              | Antiinflammatory          | 49697-38-3  |      | C <sub>24</sub> H <sub>34</sub> O <sub>3</sub>                                                  |
| Rimiterol               | Bronchodilator            | 32953-89-2  |      | C <sub>12</sub> H <sub>17</sub> NO <sub>3</sub>                                                 |
| Rimonabant              | Antiobesity               | 168273-06-1 |      | C <sub>22</sub> H <sub>21</sub> Cl <sub>3</sub> N <sub>4</sub> O                                |
| Rimoprogin              | Antibiotic                | 37750-83-7  |      | C <sub>8</sub> H <sub>7</sub> IN <sub>2</sub> OS                                                |
| Riodipine               | Antiarrhythmic            | 71653-63-9  |      | C <sub>18</sub> H <sub>19</sub> F <sub>2</sub> NO <sub>5</sub>                                  |
| Rioprostil              | Antiulcerative            | 77287-05-9  |      | C <sub>21</sub> H <sub>38</sub> O <sub>4</sub>                                                  |
| Ripazepam               | Anxiolytic                | 26308-28-1  |      | C <sub>15</sub> H <sub>16</sub> N <sub>4</sub> O                                                |
| Ripisartan              | Antihypertensive          | 148504-51-2 |      | C <sub>23</sub> H <sub>22</sub> N <sub>6</sub> O                                                |
| Risarestat              | Antidiabetic              | 79714-31-1  |      | C <sub>16</sub> H <sub>21</sub> NO <sub>4</sub> S                                               |
| Risedronic Acid         | Bone Resorption Inhibitor | 105462-24-6 |      | C <sub>7</sub> H <sub>11</sub> NO <sub>7</sub> P <sub>2</sub>                                   |
| Risocaine               | Anesthetic                | 94-12-2     |      | C <sub>10</sub> H <sub>13</sub> NO <sub>2</sub>                                                 |
| Risotilide              | Antiarrhythmic            | 120688-08-6 |      | C <sub>15</sub> H <sub>27</sub> N <sub>3</sub> O <sub>4</sub> S <sub>2</sub>                    |
| Rispenzepine            | Bronchodilator            | 96449-05-7  |      | C <sub>19</sub> H <sub>20</sub> N <sub>4</sub> O <sub>2</sub>                                   |
| Risperidone             | Antipsychotic             | 106266-06-2 | Y    | C <sub>23</sub> H <sub>27</sub> FN <sub>4</sub> O <sub>2</sub>                                  |
| Ristianol Phosphate     | Immunomodulator           | 78092-65-6  |      | C <sub>8</sub> H <sub>11</sub> NOS                                                              |
| Ritanserin              | Anxiolytic                | 87051-43-2  |      | C <sub>27</sub> H <sub>25</sub> F <sub>2</sub> N <sub>3</sub> OS                                |
| Ritiometan              | Unclassified              | 34914-39-1  |      | C <sub>7</sub> H <sub>10</sub> O <sub>6</sub> S <sub>3</sub>                                    |
| Ritipenem               | Antibiotic                | 84845-57-8  |      | C <sub>10</sub> H <sub>12</sub> N <sub>2</sub> O <sub>6</sub> S                                 |



Table S1. Cont.

| Common Name            | Indication                   | CAS Number  | Oral | Molecular Formula                                                                            |
|------------------------|------------------------------|-------------|------|----------------------------------------------------------------------------------------------|
| Ritobegron             | Antidiabetic                 | 255734-04-4 |      | C <sub>21</sub> H <sub>27</sub> NO <sub>5</sub>                                              |
| Ritodrine              | Tocolytic                    | 26652-09-5  |      | C <sub>17</sub> H <sub>21</sub> NO <sub>3</sub>                                              |
| Ritolukast             | Bronchodilator               | 111974-60-8 |      | C <sub>17</sub> H <sub>13</sub> F <sub>3</sub> N <sub>2</sub> O <sub>3</sub> S               |
| Ritonavir              | Antiviral                    | 155213-67-5 | Y    | C <sub>37</sub> H <sub>48</sub> N <sub>6</sub> O <sub>5</sub> S <sub>2</sub>                 |
| Ritropirronium Bromide | Neuromuscular Blocking Agent | 58493-54-2  |      | C <sub>19</sub> H <sub>28</sub> BrNO <sub>3</sub>                                            |
| Ritrosulfan            | Antineoplastic               | 4148-16-7   |      | C <sub>10</sub> H <sub>24</sub> N <sub>2</sub> O <sub>8</sub> S <sub>2</sub>                 |
| Rivanieline            | Nootropic                    | 15585-43-0  |      | C <sub>10</sub> H <sub>14</sub> N <sub>2</sub>                                               |
| Rivaroxaban            | Anticoagulant                | 366789-02-8 | Y    | C <sub>19</sub> H <sub>18</sub> ClN <sub>3</sub> O <sub>5</sub> S                            |
| Rivastigmine           | Nootropic                    | 123441-03-2 | Y    | C <sub>14</sub> H <sub>22</sub> N <sub>2</sub> O <sub>2</sub>                                |
| Rivenprost             | Anticoagulant                | 256382-08-8 |      | C <sub>24</sub> H <sub>34</sub> O <sub>6</sub> S                                             |
| Rivoglitazone          | Antidiabetic                 | 185428-18-6 |      | C <sub>20</sub> H <sub>19</sub> N <sub>3</sub> O <sub>4</sub> S                              |
| Rizatriptan Benzoate   | Antimigraine                 | 144034-80-0 | Y    | C <sub>15</sub> H <sub>19</sub> N <sub>5</sub>                                               |
| Rizatriptan Benzoate   | Antimigraine                 | 65-85-0     | Y    | C <sub>7</sub> H <sub>6</sub> O <sub>2</sub>                                                 |
| Robenacoxib            | Antiinflammatory             | 220991-32-2 |      | C <sub>16</sub> H <sub>13</sub> F <sub>4</sub> NO <sub>2</sub>                               |
| Robenidine             | Antibiotic                   | 25875-51-8  |      | C <sub>15</sub> H <sub>13</sub> Cl <sub>2</sub> N <sub>5</sub>                               |
| Rocastine              | Antihistaminic               | 91833-49-7  |      | C <sub>13</sub> H <sub>19</sub> N <sub>3</sub> OS                                            |
| Roceprofant            | Antithrombotic               | 132579-32-9 |      | C <sub>26</sub> H <sub>23</sub> ClN <sub>6</sub> O <sub>5</sub> S <sub>2</sub>               |
| Rociclovir             | Antiviral                    | 108436-80-2 |      | C <sub>15</sub> H <sub>25</sub> N <sub>5</sub> O <sub>3</sub>                                |
| Rociverine             | Antispasmodic                | 53716-44-2  |      | C <sub>20</sub> H <sub>37</sub> NO <sub>3</sub>                                              |
| Rocuronium             | Neuromuscular Blocking Agent | 143558-00-3 |      | C <sub>32</sub> H <sub>53</sub> N <sub>2</sub> O <sub>4</sub>                                |
| Rodocaine              | Anesthetic                   | 38821-80-6  |      | C <sub>18</sub> H <sub>25</sub> ClN <sub>2</sub> O                                           |
| Rodorbucicin           | Antineoplastic               | 96497-67-5  |      | C <sub>48</sub> H <sub>64</sub> N <sub>2</sub> O <sub>17</sub>                               |
| Rofecoxib              | Antiinflammatory             | 162011-90-7 |      | C <sub>17</sub> H <sub>14</sub> O <sub>4</sub> S                                             |
| Rofelodine             | Muscle Relaxant              | 76696-97-4  |      | C <sub>13</sub> H <sub>14</sub> N <sub>2</sub> O                                             |
| Rofleponide            | Steroid                      | 144459-70-1 |      | C <sub>25</sub> H <sub>34</sub> F <sub>2</sub> O <sub>6</sub>                                |
| Roflumilast            | Bronchodilator               | 162401-32-3 | Y    | C <sub>17</sub> H <sub>14</sub> Cl <sub>2</sub> F <sub>2</sub> N <sub>2</sub> O <sub>3</sub> |
| Roflurane              | Anesthetic                   | 679-90-3    |      | C <sub>3</sub> H <sub>4</sub> BrF <sub>3</sub> O                                             |
| Rogletimide            | Antineoplastic               | 92788-10-8  |      | C <sub>12</sub> H <sub>14</sub> N <sub>2</sub> O <sub>2</sub>                                |
| Rokitamycin            | Antibiotic                   | 74014-51-0  |      | C <sub>42</sub> H <sub>69</sub> NO <sub>15</sub>                                             |
| Rolafagrel             | Antithrombotic               | 89781-55-5  |      | C <sub>14</sub> H <sub>12</sub> N <sub>2</sub> O <sub>2</sub>                                |
| Roletamide             | Sedative                     | 10078-46-3  |      | C <sub>16</sub> H <sub>19</sub> NO <sub>4</sub>                                              |
| Rolgamidine            | Antidiarrheal                | 66608-04-6  |      | C <sub>9</sub> H <sub>16</sub> N <sub>4</sub> O                                              |
| Rolicyclidine          | Cholinergic                  | 2201-39-0   |      | C <sub>16</sub> H <sub>23</sub> N                                                            |
| Rolicyprine            | Antidepressant               | 2829-19-8   |      | C <sub>14</sub> H <sub>16</sub> N <sub>2</sub> O <sub>2</sub>                                |
| Rolipram               | Antidepressant               | 61413-54-5  |      | C <sub>16</sub> H <sub>21</sub> NO <sub>3</sub>                                              |
| Rolitetracycline       | Antibiotic                   | 751-97-3    |      | C <sub>27</sub> H <sub>33</sub> N <sub>3</sub> O <sub>8</sub>                                |
| Rolodine               | Muscle Relaxant              | 1866-43-9   |      | C <sub>14</sub> H <sub>14</sub> N <sub>4</sub>                                               |
| Rolziracetam           | Nootropic                    | 18356-28-0  |      | C <sub>7</sub> H <sub>9</sub> NO <sub>2</sub>                                                |
| Romazarit              | Antiinflammatory             | 109543-76-2 | Y    | C <sub>15</sub> H <sub>16</sub> ClNO <sub>4</sub>                                            |
| Romergoline            | Antiparkinsonian             | 107052-56-2 |      | C <sub>20</sub> H <sub>22</sub> N <sub>4</sub> O <sub>2</sub>                                |
| Romifenone             | Antiarrhythmic               | 38373-83-0  |      | C <sub>13</sub> H <sub>17</sub> NO <sub>3</sub>                                              |
| Romifidine             | Sedative                     | 65896-16-4  |      | C <sub>9</sub> H <sub>9</sub> BrFN <sub>3</sub>                                              |
| Romurtide              | Immunomodulator              | 78113-36-7  |      | C <sub>43</sub> H <sub>78</sub> N <sub>6</sub> O <sub>13</sub>                               |
| Ronactolol             | Antiarrhythmic               | 90895-85-5  |      | C <sub>20</sub> H <sub>26</sub> N <sub>2</sub> O <sub>4</sub>                                |
| Ronidazole             | Antiprotozoal                | 7681-76-7   |      | C <sub>6</sub> H <sub>8</sub> N <sub>4</sub> O <sub>4</sub>                                  |
| Ronifibrate            | Antihyperlipidemic           | 42597-57-9  | Y    | C <sub>19</sub> H <sub>20</sub> ClNO <sub>5</sub>                                            |
| Ronipamil              | Vasodilator                  | 85247-77-4  |      | C <sub>32</sub> H <sub>48</sub> N <sub>2</sub>                                               |
| Ropinirole             | Antiparkinsonian             | 91374-21-9  | Y    | C <sub>16</sub> H <sub>24</sub> N <sub>2</sub> O                                             |
| Ropitoin               | Antiarrhythmic               | 56079-81-3  |      | C <sub>30</sub> H <sub>33</sub> N <sub>3</sub> O <sub>3</sub>                                |
| Ropivacaine            | Anesthetic                   | 84057-95-4  |      | C <sub>17</sub> H <sub>26</sub> N <sub>2</sub> O                                             |
| Ropizine               | Anticonvulsant               | 3601-19-2   |      | C <sub>24</sub> H <sub>26</sub> N <sub>4</sub>                                               |
| Roquinimex             | Immunomodulator              | 84088-42-6  |      | C <sub>18</sub> H <sub>16</sub> N <sub>2</sub> O <sub>3</sub>                                |
| Rosaprostol            | Ant ulcerative               | 56695-65-9  |      | C <sub>18</sub> H <sub>34</sub> O <sub>3</sub>                                               |
| Rosaramicin            | Antibacterial                | 35834-26-5  |      | C <sub>31</sub> H <sub>51</sub> NO <sub>9</sub>                                              |
| Rosiglitazone          | Antidiabetic                 | 122320-73-4 | Y    | C <sub>18</sub> H <sub>19</sub> N <sub>3</sub> O <sub>5</sub> S                              |
| Rosoxacin              | Antibacterial                | 40034-42-2  |      | C <sub>17</sub> H <sub>14</sub> N <sub>2</sub> O <sub>3</sub>                                |
| Rostafuroxin           | Antihypertensive             | 156722-18-8 | Y    | C <sub>23</sub> H <sub>34</sub> O <sub>4</sub>                                               |
| Rostaporfin            | Ophthalmic                   | 284041-10-7 |      | C <sub>37</sub> H <sub>42</sub> Cl <sub>2</sub> N <sub>4</sub> O <sub>2</sub> Sn             |
| Rosterolone            | Androgen                     | 79243-67-7  |      | C <sub>23</sub> H <sub>38</sub> O <sub>2</sub>                                               |
| Rosuvastatin           | Antihyperlipidemic           | 287714-41-4 | Y    | C <sub>22</sub> H <sub>28</sub> FN <sub>3</sub> O <sub>6</sub> S                             |
| Rotamicillin           | Antibiotic                   | 55530-41-1  |      | C <sub>28</sub> H <sub>31</sub> N <sub>5</sub> O <sub>5</sub> S                              |

Table S1. Cont.

| Common Name                   | Indication           | CAS Number  | Oral | Molecular Formula                                                               |
|-------------------------------|----------------------|-------------|------|---------------------------------------------------------------------------------|
| Rotenone                      | Antibacterial        | 83-79-4     |      | C <sub>23</sub> H <sub>22</sub> O <sub>6</sub>                                  |
| Rotigaptide                   | Antiarrhythmic       | 355151-12-1 |      | C <sub>28</sub> H <sub>39</sub> N <sub>7</sub> O <sub>9</sub>                   |
| Rotigotine                    | Antiparkinsonian     | 99755-59-6  |      | C <sub>19</sub> H <sub>25</sub> NOS                                             |
| Rotoxamine                    | Antihistaminic       | 5560-77-0   |      | C <sub>16</sub> H <sub>19</sub> ClN <sub>2</sub> O                              |
| Rotraxate                     | Antiuclerative       | 92071-51-7  |      | C <sub>17</sub> H <sub>23</sub> NO <sub>3</sub>                                 |
| Roxadimate                    | Dermatologic         | 58882-17-0  |      | C <sub>15</sub> H <sub>23</sub> NO <sub>4</sub>                                 |
| Roxarsone                     | Antibacterial        | 121-19-7    |      | C <sub>6</sub> H <sub>6</sub> AsNO <sub>6</sub>                                 |
| Roxatidine Acetate            | Antiuclerative       | 78628-28-1  |      | C <sub>19</sub> H <sub>28</sub> N <sub>2</sub> O <sub>4</sub>                   |
| Roxibolone                    | Steroid              | 60023-92-9  |      | C <sub>21</sub> H <sub>28</sub> O <sub>5</sub>                                  |
| Roxifiban Acetate             | Antithrombotic       | 170902-47-3 |      | C <sub>21</sub> H <sub>29</sub> N <sub>5</sub> O <sub>6</sub>                   |
| Roxindole                     | Antidepressant       | 112192-04-8 |      | C <sub>23</sub> H <sub>26</sub> N <sub>2</sub> O                                |
| Roxithromycin                 | Antibiotic           | 80214-83-1  | Y    | C <sub>41</sub> H <sub>76</sub> N <sub>2</sub> O <sub>15</sub>                  |
| Roxolonium Metilsulfate       | Antihypertensive     | 53862-80-9  |      | C <sub>38</sub> H <sub>63</sub> NO <sub>8</sub> S                               |
| Roxoperone                    | Antipsychotic        | 2804-00-4   |      | C <sub>19</sub> H <sub>23</sub> FN <sub>2</sub> O <sub>3</sub>                  |
| Rubitecan                     | Antineoplastic       | 91421-42-0  |      | C <sub>20</sub> H <sub>15</sub> N <sub>3</sub> O <sub>6</sub>                   |
| Ruboxistaurin                 | Antineoplastic       | 169939-94-0 |      | C <sub>28</sub> H <sub>28</sub> N <sub>4</sub> O <sub>3</sub>                   |
| Rufinamide                    | Anticonvulsant       | 106308-44-5 | Y    | C <sub>10</sub> H <sub>8</sub> F <sub>2</sub> N <sub>4</sub> O                  |
| Rufloxacin                    | Antibiotic           | 101363-10-4 | Y    | C <sub>17</sub> H <sub>18</sub> FN <sub>3</sub> O <sub>3</sub> S                |
| Rupatadine                    | Antihistaminic       | 158876-82-5 | Y    | C <sub>26</sub> H <sub>26</sub> ClN <sub>3</sub>                                |
| Rupintrivir                   | Antiviral            | 223537-30-2 |      | C <sub>31</sub> H <sub>39</sub> FN <sub>4</sub> O <sub>7</sub>                  |
| Rutamycin                     | Antifungal           | 1404-59-7   |      | C <sub>44</sub> H <sub>72</sub> O <sub>11</sub>                                 |
| Rutin                         | Capillary Protectant | 153-18-4    |      | C <sub>27</sub> H <sub>30</sub> O <sub>16</sub>                                 |
| Ruvazone                      | Analgesic            | 20228-27-7  |      | C <sub>12</sub> H <sub>14</sub> N <sub>2</sub> O <sub>4</sub>                   |
| Ruzadolane                    | Unclassified         | 115762-17-9 |      | C <sub>18</sub> H <sub>19</sub> F <sub>2</sub> N <sub>5</sub> S                 |
| Sabarubicin                   | Antineoplastic       | 211100-13-9 |      | C <sub>32</sub> H <sub>37</sub> NO <sub>13</sub>                                |
| Sabcomeline                   | Nootropic            | 159912-53-5 |      | C <sub>10</sub> H <sub>15</sub> N <sub>3</sub> O                                |
| Sabeluzole                    | Anticonvulsant       | 104383-17-7 |      | C <sub>22</sub> H <sub>26</sub> FN <sub>3</sub> O <sub>2</sub> S                |
| Sabiporide                    | Cardiotonic          | 261505-80-0 |      | C <sub>18</sub> H <sub>19</sub> F <sub>3</sub> N <sub>6</sub> O <sub>2</sub>    |
| Safinamide                    | Diuretic             | 133865-89-1 | Y    | C <sub>17</sub> H <sub>19</sub> FN <sub>2</sub> O <sub>2</sub>                  |
| Safingol                      | Antineoplastic       | 15639-50-6  |      | C <sub>18</sub> H <sub>39</sub> NO <sub>2</sub>                                 |
| Safironil                     | Dermatologic         | 134377-69-8 |      | C <sub>15</sub> H <sub>23</sub> N <sub>3</sub> O <sub>4</sub>                   |
| Safrazine                     | Antipsychotic        | 33419-68-0  |      | C <sub>11</sub> H <sub>16</sub> N <sub>2</sub> O <sub>2</sub>                   |
| Sagandipine                   | Antihypertensive     | 126294-30-2 |      | C <sub>27</sub> H <sub>31</sub> FN <sub>2</sub> O <sub>5</sub>                  |
| Salacetamide                  | Analgesic            | 487-48-9    |      | C <sub>9</sub> H <sub>9</sub> NO <sub>3</sub>                                   |
| Salafibrate                   | Antihyperlipidemic   | 64496-66-8  |      | C <sub>32</sub> H <sub>32</sub> Cl <sub>2</sub> O <sub>10</sub>                 |
| Salantel                      | Anthelmintic         | 36093-47-7  |      | C <sub>20</sub> H <sub>11</sub> Cl <sub>2</sub> I <sub>2</sub> NO <sub>3</sub>  |
| Salazodine                    | Antihypertensive     | 22933-72-8  |      | C <sub>18</sub> H <sub>15</sub> N <sub>5</sub> O <sub>6</sub> S                 |
| Salazosulfadimidine           | Antibiotic           | 2315-08-4   |      | C <sub>19</sub> H <sub>17</sub> N <sub>5</sub> O <sub>5</sub> S                 |
| Salazosulfamide               | Antibiotic           | 139-56-0    |      | C <sub>13</sub> H <sub>11</sub> N <sub>3</sub> O <sub>5</sub> S                 |
| Salazosulfthiazole            | Antibiotic           | 515-58-2    |      | C <sub>16</sub> H <sub>12</sub> N <sub>4</sub> O <sub>5</sub> S <sub>2</sub>    |
| Salcaproic Acid               | Unclassified         | 183990-46-7 |      | C <sub>15</sub> H <sub>21</sub> NO <sub>4</sub>                                 |
| Salclobuzic Acid              | Unclassified         | 387825-03-8 |      | C <sub>11</sub> H <sub>12</sub> ClNO <sub>4</sub>                               |
| Salcolex                      | Analgesic            | 2016-36-6   |      | C <sub>7</sub> H <sub>5</sub> O <sub>3</sub> .C <sub>5</sub> H <sub>14</sub> NO |
| Salethamide Maleate           | Analgesic            | 46803-81-0  |      | C <sub>13</sub> H <sub>20</sub> N <sub>2</sub> O <sub>2</sub>                   |
| Salfluverine                  | Antispasmodic        | 587-49-5    |      | C <sub>14</sub> H <sub>10</sub> F <sub>3</sub> NO <sub>2</sub>                  |
| Salicin                       | Analgesic            | 138-52-3    |      | C <sub>13</sub> H <sub>18</sub> O <sub>7</sub>                                  |
| Salicyl Alcohol               | Anesthetic           | 90-01-7     |      | C <sub>7</sub> H <sub>8</sub> O <sub>2</sub>                                    |
| Salicylamide                  | Analgesic            | 65-45-2     |      | C <sub>7</sub> H <sub>7</sub> NO <sub>2</sub>                                   |
| Salicylanilide                | Antifungal           | 87-17-2     |      | C <sub>13</sub> H <sub>11</sub> NO <sub>2</sub>                                 |
| Salicylic Acid                | Dermatologic         | 69-72-7     | Y    | C <sub>7</sub> H <sub>6</sub> O <sub>3</sub>                                    |
| Salicylic Anhydride Diacetate | Antiinflammatory     | 1466-82-6   |      | C <sub>18</sub> H <sub>14</sub> O <sub>7</sub>                                  |
| Salicylic Acid                | Antiinflammatory     | 487-54-7    |      | C <sub>9</sub> H <sub>9</sub> NO <sub>4</sub>                                   |
| Salinazid                     | Antibiotic           | 495-84-1    |      | C <sub>13</sub> H <sub>11</sub> N <sub>3</sub> O <sub>2</sub>                   |
| Salinomycin                   | Antibiotic           | 53003-10-4  |      | C <sub>42</sub> H <sub>70</sub> O <sub>11</sub>                                 |
| Salmefamol                    | Bronchodilator       | 18910-65-1  |      | C <sub>19</sub> H <sub>25</sub> NO <sub>4</sub>                                 |
| Salmeterol                    | Bronchodilator       | 89365-50-4  |      | C <sub>25</sub> H <sub>37</sub> NO <sub>4</sub>                                 |
| Salmeterol Xinafoate          | Bronchodilator       | 86-48-6     |      | C <sub>11</sub> H <sub>8</sub> O <sub>3</sub>                                   |
| Salmisteine                   | Mucolytic            | 89767-59-9  |      | C <sub>14</sub> H <sub>15</sub> NO <sub>6</sub> S                               |
| Salnacedin                    | Antiinflammatory     | 87573-01-1  |      | C <sub>12</sub> H <sub>13</sub> NO <sub>5</sub> S                               |
| Salprotoside                  | Cardiotonic          | 33779-37-2  |      | C <sub>25</sub> H <sub>30</sub> O <sub>10</sub>                                 |
| Salsalate                     | Analgesic            | 552-94-3    | Y    | C <sub>14</sub> H <sub>10</sub> O <sub>5</sub>                                  |
| Salverine                     | Analgesic            | 6376-26-7   |      | C <sub>19</sub> H <sub>24</sub> N <sub>2</sub> O <sub>2</sub>                   |
| Sameridine                    | Anesthetic           | 143257-97-0 |      | C <sub>21</sub> H <sub>34</sub> N <sub>2</sub> O                                |

Table S1. Cont.

| Common Name           | Indication       | CAS Number  | Oral | Molecular Formula                                                                           |
|-----------------------|------------------|-------------|------|---------------------------------------------------------------------------------------------|
| Samixogrel            | Antithrombotic   | 133276-80-9 |      | C <sub>25</sub> H <sub>25</sub> ClN <sub>2</sub> O <sub>4</sub> S                           |
| Sampatrilat           | Antihypertensive | 129981-36-8 |      | C <sub>26</sub> H <sub>40</sub> N <sub>4</sub> O <sub>5</sub> S                             |
| Sampirtine            | Analgesic        | 115911-28-9 |      | C <sub>12</sub> H <sub>12</sub> FN <sub>3</sub>                                             |
| Sancycline            | Antibacterial    | 808-26-4    |      | C <sub>21</sub> H <sub>22</sub> N <sub>2</sub> O <sub>7</sub>                               |
| Sanfetrinem Cilexetil | Antibacterial    | 141646-08-4 |      | C <sub>23</sub> H <sub>33</sub> NO <sub>8</sub>                                             |
| Sanfetrinem Sodium    | Antibacterial    | 156769-21-0 |      | C <sub>14</sub> H <sub>19</sub> NO <sub>5</sub>                                             |
| Santonin              | Anthelmintic     | 481-06-1    |      | C <sub>15</sub> H <sub>18</sub> O <sub>3</sub>                                              |
| Saperconazole         | Antifungal       | 110588-57-3 |      | C <sub>35</sub> H <sub>38</sub> F <sub>2</sub> N <sub>8</sub> O <sub>4</sub>                |
| Saprisartan Potassium | Antihypertensive | 146623-69-0 |      | C <sub>25</sub> H <sub>22</sub> BrF <sub>3</sub> N <sub>4</sub> O <sub>4</sub> S            |
| Saquinavir            | Antiviral        | 127779-20-8 | Y    | C <sub>38</sub> H <sub>50</sub> N <sub>6</sub> O <sub>5</sub>                               |
| Sarafloxacin          | Antibiotic       | 98105-99-8  | Y    | C <sub>20</sub> H <sub>17</sub> F <sub>2</sub> N <sub>3</sub> O <sub>3</sub>                |
| Sarakalim             | Antihypertensive | 148430-28-8 |      | C <sub>20</sub> H <sub>19</sub> F <sub>3</sub> N <sub>2</sub> O <sub>4</sub>                |
| Saralasin             | Antihypertensive | 34273-10-4  |      | C <sub>42</sub> H <sub>65</sub> N <sub>13</sub> O <sub>10</sub>                             |
| Sarcolysin            | Antineoplastic   | 531-76-0    |      | C <sub>13</sub> H <sub>18</sub> Cl <sub>2</sub> N <sub>2</sub> O <sub>2</sub>               |
| Sardomozide           | Antipsychotic    | 149400-88-4 |      | C <sub>11</sub> H <sub>14</sub> N <sub>6</sub>                                              |
| Saredutant            | Bronchodilator   | 142001-63-6 |      | C <sub>31</sub> H <sub>35</sub> Cl <sub>2</sub> N <sub>3</sub> O <sub>2</sub>               |
| Saripidem             | Sedative         | 103844-86-6 |      | C <sub>19</sub> H <sub>20</sub> ClN <sub>3</sub> O                                          |
| Sarizotan             | Antiparkinsonian | 351862-32-3 |      | C <sub>22</sub> H <sub>21</sub> FN <sub>2</sub> O                                           |
| Sarmazenil            | Anxiolytic       | 78771-13-8  |      | C <sub>15</sub> H <sub>14</sub> ClN <sub>3</sub> O <sub>3</sub>                             |
| Sarmoxicillin         | Antibacterial    | 67337-44-4  |      | C <sub>21</sub> H <sub>27</sub> N <sub>3</sub> O <sub>5</sub> S                             |
| Sarpicillin           | Antibacterial    | 40966-79-8  |      | C <sub>21</sub> H <sub>27</sub> N <sub>3</sub> O <sub>5</sub> S                             |
| Sarpogrelate          | Antithrombotic   | 125926-17-2 |      | C <sub>24</sub> H <sub>31</sub> NO <sub>6</sub>                                             |
| Satavaptan            | Hepatoprotectant | 185913-78-4 |      | C <sub>33</sub> H <sub>45</sub> N <sub>3</sub> O <sub>8</sub> S                             |
| Saterinone            | Cardiotonic      | 102669-89-6 |      | C <sub>27</sub> H <sub>30</sub> N <sub>4</sub> O <sub>4</sub>                               |
| Satigrel              | Antithrombotic   | 111753-73-2 |      | C <sub>20</sub> H <sub>19</sub> NO <sub>4</sub>                                             |
| Satranidazole         | Antiamoebic      | 56302-13-7  |      | C <sub>8</sub> H <sub>11</sub> N <sub>5</sub> O <sub>5</sub> S                              |
| Saviprazole           | Antiulcerative   | 121617-11-6 |      | C <sub>15</sub> H <sub>10</sub> F <sub>7</sub> N <sub>3</sub> O <sub>2</sub> S <sub>2</sub> |
| Savoxepin             | Antidepressant   | 79262-46-7  |      | C <sub>25</sub> H <sub>26</sub> N <sub>2</sub> O                                            |
| Saxagliptin           | Antidiabetic     | 361442-04-8 |      | C <sub>18</sub> H <sub>25</sub> N <sub>3</sub> O <sub>2</sub>                               |
| Scopinast             | Antihistamine    | 145574-90-9 |      | C <sub>31</sub> H <sub>31</sub> F <sub>2</sub> NO <sub>5</sub>                              |
| Scopolamine           | Antispasmodic    | 51-34-3     |      | C <sub>17</sub> H <sub>21</sub> NO <sub>4</sub>                                             |
| Secalciferol          | Steroid          | 55721-11-4  |      | C <sub>27</sub> H <sub>44</sub> O <sub>3</sub>                                              |
| Seclazone             | Antiinflammatory | 29050-11-1  |      | C <sub>10</sub> H <sub>8</sub> ClNO <sub>3</sub>                                            |
| Secnidazole           | Antiamoebic      | 3366-95-8   | Y    | C <sub>7</sub> H <sub>11</sub> N <sub>3</sub> O <sub>3</sub>                                |
| Secobarbital          | Sedative         | 76-73-3     | Y    | C <sub>12</sub> H <sub>18</sub> N <sub>2</sub> O <sub>3</sub>                               |
| Secoverine            | Antispasmodic    | 57558-44-8  |      | C <sub>22</sub> H <sub>35</sub> NO <sub>2</sub>                                             |
| Sedecamycin           | Antibacterial    | 23477-98-7  |      | C <sub>27</sub> H <sub>35</sub> NO <sub>8</sub>                                             |
| Seganserlin           | Antidepressant   | 87729-89-3  |      | C <sub>29</sub> H <sub>27</sub> F <sub>2</sub> N <sub>3</sub> O                             |
| Segesterone           | Progestogen      | 7690-08-6   |      | C <sub>21</sub> H <sub>28</sub> O <sub>3</sub>                                              |
| Seglitide             | Antidiabetic     | 81377-02-8  |      | C <sub>44</sub> H <sub>56</sub> N <sub>8</sub> O <sub>7</sub>                               |
| Selamectin            | Anthelmintic     | 220119-17-5 |      | C <sub>43</sub> H <sub>63</sub> NO <sub>11</sub>                                            |
| Selegiline            | Antiparkinsonian | 14611-51-9  | Y    | C <sub>13</sub> H <sub>17</sub> N                                                           |
| Seletracetam          | Anticonvulsant   | 357336-74-4 |      | C <sub>10</sub> H <sub>14</sub> F <sub>2</sub> N <sub>2</sub> O                             |
| Selfotel              | Antipsychotic    | 110347-85-8 |      | C <sub>7</sub> H <sub>14</sub> NO <sub>5</sub> P                                            |
| Seliciclib            | Antineoplastic   | 186692-46-6 | Y    | C <sub>19</sub> H <sub>26</sub> N <sub>6</sub> O                                            |
| Selodenson            | Antiarrhythmic   | 110299-05-3 |      | C <sub>17</sub> H <sub>24</sub> N <sub>6</sub> O <sub>4</sub>                               |
| Selprazine            | Antipsychotic    | 103997-59-7 |      | C <sub>24</sub> H <sub>31</sub> N <sub>3</sub> O <sub>3</sub>                               |
| Semapimod             | Antiinflammatory | 352513-83-8 | Y    | C <sub>34</sub> H <sub>52</sub> N <sub>18</sub> O <sub>2</sub>                              |
| Sematilide            | Antiarrhythmic   | 101526-83-4 |      | C <sub>14</sub> H <sub>23</sub> N <sub>3</sub> O <sub>3</sub> S                             |
| Semaxanib             | Antineoplastic   | 194413-58-6 |      | C <sub>15</sub> H <sub>14</sub> N <sub>2</sub> O                                            |
| Semduramicin          | Antibiotic       | 113378-31-7 |      | C <sub>45</sub> H <sub>76</sub> O <sub>16</sub>                                             |
| Semorphone            | Analgesic        | 88939-40-6  |      | C <sub>19</sub> H <sub>23</sub> NO <sub>5</sub>                                             |
| Semotiadil            | Antianginal      | 116476-13-2 |      | C <sub>29</sub> H <sub>32</sub> N <sub>2</sub> O <sub>6</sub> S                             |
| Semustine             | Antineoplastic   | 13909-09-6  |      | C <sub>10</sub> H <sub>18</sub> ClN <sub>3</sub> O <sub>2</sub>                             |
| Senazodan             | Cardiotonic      | 98326-32-0  |      | C <sub>15</sub> H <sub>14</sub> N <sub>4</sub> O                                            |
| Seocalcitol           | Steroid          | 134404-52-7 |      | C <sub>30</sub> H <sub>46</sub> O <sub>3</sub>                                              |
| Seperidol             | Antipsychotic    | 10457-91-7  |      | C <sub>22</sub> H <sub>22</sub> ClF <sub>4</sub> NO <sub>2</sub>                            |
| Sepimostat            | Anticoagulant    | 103926-64-3 |      | C <sub>21</sub> H <sub>19</sub> N <sub>5</sub> O <sub>2</sub>                               |
| Seprilose             | Antirheumatic    | 133692-55-4 |      | C <sub>16</sub> H <sub>30</sub> O <sub>6</sub>                                              |
| Seproxtetine          | Antidepressant   | 126924-38-7 |      | C <sub>16</sub> H <sub>16</sub> F <sub>3</sub> NO                                           |
| Sequifenadine         | Antihistaminic   | 57734-69-7  |      | C <sub>22</sub> H <sub>27</sub> NO                                                          |
| Seratrovast           | Antiinflammatory | 112665-43-7 | Y    | C <sub>22</sub> H <sub>26</sub> O <sub>4</sub>                                              |
| Serazapine            | Anxiolytic       | 115313-22-9 |      | C <sub>22</sub> H <sub>23</sub> N <sub>3</sub> O <sub>2</sub>                               |

Table S1. Cont.

| Common Name          | Indication             | CAS Number  | Oral | Molecular Formula                                                               |
|----------------------|------------------------|-------------|------|---------------------------------------------------------------------------------|
| Serfibrate           | Antihyperlipidemic     | 54657-98-6  |      | C <sub>16</sub> H <sub>20</sub> ClNO <sub>5</sub> S                             |
| Sergolexole Maleate  | Antimigraine           | 108674-86-8 |      | C <sub>26</sub> H <sub>36</sub> N <sub>2</sub> O <sub>3</sub>                   |
| Sermetacin           | Antiinflammatory       | 57645-05-3  |      | C <sub>22</sub> H <sub>21</sub> ClN <sub>2</sub> O <sub>6</sub>                 |
| Sertaconazole        | Antifungal             | 99592-32-2  |      | C <sub>20</sub> H <sub>15</sub> Cl <sub>3</sub> N <sub>2</sub> O <sub>5</sub> S |
| Sertindole           | Antipsychotic          | 106516-24-9 | Y    | C <sub>24</sub> H <sub>26</sub> ClFN <sub>4</sub> O                             |
| Sertraline           | Antidepressant         | 79617-96-2  | Y    | C <sub>17</sub> H <sub>17</sub> Cl <sub>2</sub> N                               |
| Setastine            | Antihistaminic         | 64294-95-7  | Y    | C <sub>22</sub> H <sub>28</sub> ClNO                                            |
| Setazindol           | Antidepressant         | 28570-99-2  |      | C <sub>15</sub> H <sub>16</sub> ClNO                                            |
| Setipafant           | Antithrombotic         | 132418-35-0 |      | C <sub>26</sub> H <sub>23</sub> ClN <sub>6</sub> O <sub>2</sub> S               |
| Setiptiline          | Antidepressant         | 57262-94-9  |      | C <sub>19</sub> H <sub>19</sub> N                                               |
| Setoperone           | Antipsychotic          | 86487-64-1  |      | C <sub>21</sub> H <sub>24</sub> FN <sub>3</sub> O <sub>2</sub> S                |
| Sevotroplum Mesilate | Bronchodilator         | 88199-75-1  |      | C <sub>24</sub> H <sub>29</sub> NO <sub>5</sub> S <sub>2</sub>                  |
| Sevoflurane          | Anesthetic             | 28523-86-6  |      | C <sub>4</sub> H <sub>3</sub> F <sub>7</sub> O                                  |
| Sevopramide          | Antidepressant         | 57227-17-5  |      | C <sub>29</sub> H <sub>43</sub> N <sub>3</sub> O <sub>3</sub>                   |
| Sezolamide           | Antiglaucoma           | 123308-22-5 |      | C <sub>11</sub> H <sub>18</sub> N <sub>2</sub> O <sub>4</sub> S <sub>3</sub>    |
| Sibenaedet           | Respiratory Stimulant  | 154189-40-9 |      | C <sub>22</sub> H <sub>28</sub> N <sub>2</sub> O <sub>5</sub> S <sub>2</sub>    |
| Sibopirdine          | Nootropic              | 122955-18-4 |      | C <sub>23</sub> H <sub>18</sub> N <sub>4</sub>                                  |
| Sibrafiban           | Antithrombotic         | 172927-65-0 |      | C <sub>20</sub> H <sub>28</sub> N <sub>4</sub> O <sub>6</sub>                   |
| Sibutramine          | Antiobesity            | 106650-56-0 |      | C <sub>17</sub> H <sub>26</sub> ClN                                             |
| Siccanin             | Antifungal             | 22733-60-4  |      | C <sub>22</sub> H <sub>30</sub> O <sub>3</sub>                                  |
| Sifaprazine          | Sedative               | 131635-06-8 |      | C <sub>18</sub> H <sub>22</sub> N <sub>2</sub>                                  |
| Siguazodan           | Cardiotonic            | 115344-47-3 |      | C <sub>14</sub> H <sub>16</sub> N <sub>6</sub> O                                |
| Silandrone           | Androgen               | 5055-42-5   |      | C <sub>22</sub> H <sub>36</sub> O <sub>2</sub> Si                               |
| Sildenafil           | Erectile Dysfunction   | 139755-83-2 | Y    | C <sub>22</sub> H <sub>30</sub> N <sub>6</sub> O <sub>4</sub> S                 |
| Silibinin            | Hepatic Protectant     | 22888-70-6  |      | C <sub>25</sub> H <sub>22</sub> O <sub>10</sub>                                 |
| Silicristin          | Hepatic Protectant     | 33889-69-9  |      | C <sub>25</sub> H <sub>22</sub> O <sub>10</sub>                                 |
| Silidianin           | Hepatic Protectant     | 29782-68-1  |      | C <sub>25</sub> H <sub>22</sub> O <sub>10</sub>                                 |
| Silodosin            | Urologic               | 160970-54-7 | Y    | C <sub>25</sub> H <sub>32</sub> F <sub>3</sub> N <sub>3</sub> O <sub>4</sub>    |
| Silperisone          | Muscle Relaxant        | 140944-31-6 |      | C <sub>15</sub> H <sub>24</sub> FNSi                                            |
| Siltenzepine         | Anticonvulsant         | 98374-54-0  |      | C <sub>19</sub> H <sub>20</sub> ClN <sub>3</sub> O <sub>4</sub>                 |
| Silver Sulfadiazine  | Antibacterial          | 22199-08-2  |      | C <sub>10</sub> H <sub>9</sub> AgN <sub>4</sub> O <sub>2</sub> S                |
| Simendan             | Cardiotonic            | 131741-08-7 |      | C <sub>14</sub> H <sub>12</sub> N <sub>6</sub> O                                |
| Simetride            | Analgesic              | 154-82-5    |      | C <sub>28</sub> H <sub>38</sub> N <sub>2</sub> O <sub>6</sub>                   |
| Simfibrate           | Antihyperlipidemic     | 14929-11-4  |      | C <sub>23</sub> H <sub>26</sub> Cl <sub>2</sub> O <sub>6</sub>                  |
| Simotaxel            | Antineoplastic         | 791635-59-1 |      | C <sub>46</sub> H <sub>57</sub> NO <sub>15</sub> S                              |
| Simtrazene           | Antineoplastic         | 5579-27-1   |      | C <sub>14</sub> H <sub>16</sub> N <sub>4</sub>                                  |
| Simvastatin          | Antihyperlipidemic     | 79902-63-9  | Y    | C <sub>25</sub> H <sub>38</sub> O <sub>5</sub>                                  |
| Sinefungin           | Antifungal             | 58944-73-3  |      | C <sub>15</sub> H <sub>23</sub> N <sub>7</sub> O <sub>5</sub>                   |
| Sinitrodil           | Antihypertensive       | 143248-63-9 |      | C <sub>10</sub> H <sub>10</sub> N <sub>2</sub> O <sub>5</sub>                   |
| Sintropium Bromide   | Antispasmodic          | 79467-19-9  |      | C <sub>19</sub> H <sub>36</sub> BrNO <sub>2</sub>                               |
| Sipatrigine          | Anticonvulsant         | 130800-90-7 |      | C <sub>15</sub> H <sub>16</sub> Cl <sub>3</sub> N <sub>5</sub>                  |
| Sipoglitazar         | Antidiabetic           | 342026-92-0 |      | C <sub>25</sub> H <sub>25</sub> N <sub>3</sub> O <sub>4</sub> S                 |
| Siramesine           | Antipsychotic          | 147817-50-3 |      | C <sub>30</sub> H <sub>31</sub> FN <sub>2</sub> O                               |
| Siratiazem           | Antihypertensive       | 138778-28-6 |      | C <sub>24</sub> H <sub>30</sub> N <sub>2</sub> O <sub>4</sub> S                 |
| Sirolimus            | Immunosuppressant      | 53123-88-9  | Y    | C <sub>51</sub> H <sub>79</sub> NO <sub>13</sub>                                |
| Sisomicin            | Antibacterial          | 32385-11-8  |      | C <sub>19</sub> H <sub>37</sub> N <sub>5</sub> O <sub>7</sub>                   |
| Sitafloxacin         | Antibacterial          | 127254-12-0 | Y    | C <sub>19</sub> H <sub>18</sub> ClF <sub>2</sub> N <sub>3</sub> O <sub>3</sub>  |
| Sitalidone           | Diuretic               | 119636-74-7 |      | C <sub>23</sub> H <sub>29</sub> ClN <sub>2</sub> O <sub>5</sub> S               |
| Sitamaquine          | Antimalarial           | 57695-04-2  |      | C <sub>21</sub> H <sub>33</sub> N <sub>3</sub> O                                |
| Sitaxentan           | Antihypertensive       | 184036-34-8 |      | C <sub>18</sub> H <sub>15</sub> ClN <sub>2</sub> O <sub>6</sub> S <sub>2</sub>  |
| Sitofibrate          | Antihyperlipidemic     | 55902-94-8  |      | C <sub>39</sub> H <sub>59</sub> ClO <sub>3</sub>                                |
| Sitogluside          | Unclassified           | 474-58-8    |      | C <sub>35</sub> H <sub>60</sub> O <sub>6</sub>                                  |
| Sitosterol           | Steroid                | 83-46-5     |      | C <sub>29</sub> H <sub>50</sub> O                                               |
| Sivelestat           | Respiratory Stimulant  | 127373-66-4 |      | C <sub>20</sub> H <sub>22</sub> N <sub>2</sub> O <sub>7</sub> S                 |
| Soblidotin           | Antineoplastic         | 149606-27-9 |      | C <sub>39</sub> H <sub>67</sub> N <sub>5</sub> O <sub>6</sub>                   |
| Sobuzoxane           | Antineoplastic         | 98631-95-9  |      | C <sub>22</sub> H <sub>34</sub> N <sub>4</sub> O <sub>10</sub>                  |
| Cacodylate           | Anthelminthic          | 15132-04-4  |      | C <sub>2</sub> H <sub>6</sub> AsO <sub>2</sub>                                  |
| Dehydroacetate       | Choleretic             | 45990-85-0  |      | C <sub>8</sub> H <sub>7</sub> O <sub>4</sub>                                    |
| Dibunate             | Antitussive            | 14992-58-6  |      | C <sub>18</sub> H <sub>24</sub> O <sub>3</sub> S                                |
| Dichloroacetic Acid  | Nootropic              | 79-43-6     |      | C <sub>2</sub> H <sub>2</sub> Cl <sub>2</sub> O <sub>2</sub>                    |
| Sodium Ethasulfate   | Respiratory Stimulant  | 72214-01-8  |      | C <sub>8</sub> H <sub>18</sub> O <sub>4</sub> S                                 |
| Sodium Gentisate     | Analgesic              | 490-79-9    |      | C <sub>7</sub> H <sub>6</sub> O <sub>4</sub>                                    |
| Gluconate            | Plasma Volume Expander | 608-59-3    |      | C <sub>6</sub> H <sub>11</sub> O <sub>7</sub>                                   |

Table S1. Cont.

| Common Name              | Indication            | CAS Number  | Oral | Molecular Formula                                                              |
|--------------------------|-----------------------|-------------|------|--------------------------------------------------------------------------------|
| Glucosulfone             | Antibiotic            | 551-89-3    |      | C <sub>24</sub> H <sub>36</sub> N <sub>2</sub> O <sub>18</sub> S <sub>3</sub>  |
| Gualenate                | Antiinflammatory      | 16915-32-5  |      | C <sub>15</sub> H <sub>18</sub> O <sub>3</sub> S                               |
| Hydroxybenzylphosphinate | Unclassified          | 52705-43-8  |      | C <sub>7</sub> H <sub>9</sub> O <sub>3</sub> P                                 |
| Monofluorophosphate      | Dermatologic          | 13537-32-1  |      | FH <sub>2</sub> O <sub>3</sub> P                                               |
| Oxybate                  | Anesthetic            | 591-81-1    |      | C <sub>4</sub> H <sub>8</sub> O <sub>3</sub>                                   |
| Phenylacetate            | Antidote              | 7631-42-7   |      | C <sub>8</sub> H <sub>7</sub> O <sub>2</sub>                                   |
| Picofosfate              | Unclassified          | 36175-06-1  |      | C <sub>18</sub> H <sub>17</sub> NO <sub>8</sub> P <sub>2</sub>                 |
| Picosulfate              | Laxative              | 10040-34-3  | Y    | C <sub>18</sub> H <sub>15</sub> N <sub>2</sub> O <sub>8</sub> S <sub>2</sub>   |
| Stibocaptate             | Antiprotozoal         | 1986-66-9   |      | C <sub>12</sub> H <sub>12</sub> O <sub>12</sub> S <sub>6</sub> Sb <sub>2</sub> |
| Stibogluconate           | Antiprotozoal         | 100817-46-7 |      | C <sub>12</sub> H <sub>20</sub> O <sub>17</sub> Sb <sub>2</sub>                |
| Succinate                | Respiratory Stimulant | 56-14-4     | Y    | C <sub>4</sub> H <sub>4</sub> O <sub>4</sub>                                   |
| Sofalcone                | Ant ulcerative        | 64506-49-6  |      | C <sub>27</sub> H <sub>30</sub> O <sub>6</sub>                                 |
| Solabegron               | Antidiabetic          | 252920-94-8 |      | C <sub>23</sub> H <sub>23</sub> ClN <sub>2</sub> O <sub>3</sub>                |
| Solasulfone              | Antibiotic            | 118-84-3    |      | C <sub>30</sub> H <sub>32</sub> N <sub>2</sub> O <sub>14</sub> S <sub>5</sub>  |
| Solifenacin              | Antispasmodic         | 242478-37-1 | Y    | C <sub>23</sub> H <sub>26</sub> N <sub>2</sub> O <sub>2</sub>                  |
| Solimastat               | Antineoplastic        | 226072-63-5 |      | C <sub>20</sub> H <sub>32</sub> N <sub>4</sub> O <sub>5</sub>                  |
| Solpecainol              | Antiarrhythmic        | 155321-96-3 |      | C <sub>18</sub> H <sub>23</sub> NO <sub>3</sub>                                |
| Solypertine Tartrate     | Antihypertensive      | 4448-96-8   |      | C <sub>22</sub> H <sub>25</sub> N <sub>3</sub> O <sub>3</sub>                  |
| Somantadine              | Antiviral             | 79594-24-4  |      | C <sub>14</sub> H <sub>25</sub> N                                              |
| Soneclozan               | Antibacterial         | 3380-30-1   |      | C <sub>12</sub> H <sub>8</sub> Cl <sub>2</sub> O <sub>2</sub>                  |
| Sonepiprazole            | Antipsychotic         | 170858-33-0 |      | C <sub>21</sub> H <sub>27</sub> N <sub>3</sub> O <sub>3</sub> S                |
| Sopitazine               | Antihistaminic        | 23492-69-5  |      | C <sub>20</sub> H <sub>23</sub> N <sub>3</sub> OS                              |
| Sopromidine              | Antihistaminic        | 79313-75-0  |      | C <sub>14</sub> H <sub>23</sub> N <sub>7</sub> S                               |
| Soquinolol               | Antihypertensive      | 61563-18-6  |      | C <sub>17</sub> H <sub>26</sub> N <sub>2</sub> O <sub>3</sub>                  |
| Sorafenib                | Antineoplastic        | 284461-73-0 | Y    | C <sub>21</sub> H <sub>16</sub> ClF <sub>3</sub> N <sub>4</sub> O <sub>3</sub> |
| Soraprazan               | Ant ulcerative        | 261944-46-1 |      | C <sub>21</sub> H <sub>25</sub> N <sub>3</sub> O <sub>3</sub>                  |
| Sorbinate                | Antihyperlipidemic    | 6184-06-1   |      | C <sub>42</sub> H <sub>32</sub> N <sub>6</sub> O <sub>12</sub>                 |
| Sorbiniol                | Antidiabetic          | 68367-52-2  |      | C <sub>11</sub> H <sub>9</sub> FN <sub>2</sub> O <sub>3</sub>                  |
| Soretolide               | Anticonvulsant        | 130403-08-6 |      | C <sub>13</sub> H <sub>14</sub> N <sub>2</sub> O <sub>2</sub>                  |
| Sorivudine               | Antiviral             | 77181-69-2  |      | C <sub>11</sub> H <sub>13</sub> BrN <sub>2</sub> O <sub>6</sub>                |
| Sornidipine              | Vasodilator           | 95105-77-4  |      | C <sub>22</sub> H <sub>24</sub> N <sub>2</sub> O <sub>9</sub>                  |
| Sotalol                  | Antianginal           | 3930-20-9   | Y    | C <sub>12</sub> H <sub>20</sub> N <sub>2</sub> O <sub>3</sub> S                |
| Soterinol                | Bronchodilator        | 13642-52-9  |      | C <sub>12</sub> H <sub>20</sub> N <sub>2</sub> O <sub>4</sub> S                |
| Sotirimod                | Dermatologic          | 227318-75-4 |      | C <sub>14</sub> H <sub>17</sub> N <sub>5</sub>                                 |
| Spaglumic Acid           | Antihistaminic        | 4910-46-7   |      | C <sub>11</sub> H <sub>16</sub> N <sub>2</sub> O <sub>8</sub>                  |
| Sparfloxacin             | Antibiotic            | 110871-86-8 | Y    | C <sub>19</sub> H <sub>22</sub> F <sub>2</sub> N <sub>4</sub> O <sub>3</sub>   |
| Sparfosate Sodium        | Antineoplastic        | 51321-79-0  |      | C <sub>6</sub> H <sub>10</sub> NO <sub>8</sub> P                               |
| Sparsomycin              | Antineoplastic        | 1404-64-4   |      | C <sub>13</sub> H <sub>19</sub> N <sub>3</sub> O <sub>5</sub> S <sub>2</sub>   |
| Sparteine                | Cardiotonic           | 90-39-1     |      | C <sub>15</sub> H <sub>26</sub> N <sub>2</sub>                                 |
| Spectinomycin            | Antibiotic            | 1695-77-8   |      | C <sub>14</sub> H <sub>24</sub> N <sub>2</sub> O <sub>7</sub>                  |
| Spiclamine               | Antidepressant        | 90243-97-3  |      | C <sub>20</sub> H <sub>25</sub> ClN <sub>2</sub> O                             |
| Spiclomazine             | Antipsychotic         | 24527-27-3  |      | C <sub>22</sub> H <sub>24</sub> ClN <sub>3</sub> OS <sub>2</sub>               |
| Spiiperone               | Antipsychotic         | 749-02-0    |      | C <sub>23</sub> H <sub>26</sub> FN <sub>3</sub> O <sub>2</sub>                 |
| Spiradoline Mesylate     | Analgesic             | 87151-85-7  |      | C <sub>22</sub> H <sub>30</sub> Cl <sub>2</sub> N <sub>2</sub> O <sub>2</sub>  |
| Spiramide                | Nootropic             | 510-74-7    |      | C <sub>22</sub> H <sub>26</sub> FN <sub>3</sub> O <sub>2</sub>                 |
| Spirapril                | Antihypertensive      | 83647-97-6  | Y    | C <sub>22</sub> H <sub>30</sub> N <sub>2</sub> O <sub>5</sub> S <sub>2</sub>   |
| Spiraprilat              | Antihypertensive      | 83602-05-5  |      | C <sub>20</sub> H <sub>26</sub> N <sub>2</sub> O <sub>5</sub> S <sub>2</sub>   |
| Spirendolol              | Antihypertensive      | 81840-58-6  |      | C <sub>21</sub> H <sub>31</sub> NO <sub>3</sub>                                |
| Spirgetine               | Unclassified          | 144-45-6    |      | C <sub>10</sub> H <sub>20</sub> N <sub>4</sub>                                 |
| Spirilene                | Antipsychotic         | 357-66-4    |      | C <sub>24</sub> H <sub>28</sub> FN <sub>3</sub> O                              |
| Spiriprostil             | Prostaglandin         | 122946-42-3 |      | C <sub>20</sub> H <sub>34</sub> N <sub>2</sub> O <sub>4</sub>                  |
| Spirobarbital Sodium     | Sedative              | 72035-36-0  |      | C <sub>12</sub> H <sub>20</sub> N <sub>2</sub> O <sub>2</sub> S                |
| Spirofyline              | Bronchodilator        | 98204-48-9  |      | C <sub>24</sub> H <sub>28</sub> N <sub>6</sub> O <sub>5</sub>                  |
| Spirogermanium           | Antineoplastic        | 41992-23-8  |      | C <sub>17</sub> H <sub>36</sub> GeN <sub>2</sub>                               |
| Spiroglumide             | Ant ulcerative        | 137795-35-8 |      | C <sub>21</sub> H <sub>26</sub> Cl <sub>2</sub> N <sub>2</sub> O <sub>4</sub>  |
| Spiromustine             | Antineoplastic        | 56605-16-4  |      | C <sub>14</sub> H <sub>23</sub> Cl <sub>2</sub> N <sub>3</sub> O <sub>2</sub>  |
| Spirocholactone          | Diuretic              | 1952-01-7   | Y    | C <sub>24</sub> H <sub>32</sub> O <sub>4</sub> S                               |
| Spirorenone              | Steroid               | 74220-07-8  |      | C <sub>24</sub> H <sub>28</sub> O <sub>3</sub>                                 |
| Spiroxasone              | Diuretic              | 6673-97-8   |      | C <sub>24</sub> H <sub>34</sub> O <sub>3</sub> S                               |
| Spiroaxtrine             | Vasodilator           | 1054-88-2   |      | C <sub>22</sub> H <sub>25</sub> N <sub>3</sub> O <sub>3</sub>                  |
| Spiropepin               | Antidepressant        | 47254-05-7  |      | C <sub>19</sub> H <sub>21</sub> NO <sub>3</sub>                                |
| Spizofurone              | Ant ulcerative        | 72492-12-7  |      | C <sub>12</sub> H <sub>10</sub> O <sub>3</sub>                                 |
| Squalamine Lactate       | Antineoplastic        | 148717-90-2 |      | C <sub>34</sub> H <sub>65</sub> N <sub>3</sub> O <sub>5</sub> S                |

Table S1. Cont.

| Common Name                | Indication                   | CAS Number  | Oral | Molecular Formula                                                               |
|----------------------------|------------------------------|-------------|------|---------------------------------------------------------------------------------|
| Stacofylline               | Bronchodilator               | 98833-92-2  |      | C <sub>20</sub> H <sub>33</sub> N <sub>7</sub> O <sub>3</sub>                   |
| Stallimycin                | Antibacterial                | 636-47-5    |      | C <sub>22</sub> H <sub>27</sub> N <sub>9</sub> O <sub>4</sub>                   |
| Stanolone                  | Androgen                     | 521-18-6    |      | C <sub>19</sub> H <sub>30</sub> O <sub>2</sub>                                  |
| Stanozolol                 | Steroid                      | 10418-03-8  |      | C <sub>21</sub> H <sub>32</sub> N <sub>2</sub> O                                |
| Stavudine                  | Antiviral                    | 3056-17-5   | Y    | C <sub>10</sub> H <sub>12</sub> N <sub>2</sub> O <sub>4</sub>                   |
| Stearylsulfamide           | Diuretic                     | 498-78-2    |      | C <sub>24</sub> H <sub>42</sub> N <sub>2</sub> O <sub>3</sub> S                 |
| Steffimycin                | Antibacterial                | 11033-34-4  |      | C <sub>28</sub> H <sub>30</sub> O <sub>13</sub>                                 |
| Stenbolone Acetate         | Steroid                      | 1242-56-4   |      | C <sub>22</sub> H <sub>32</sub> O <sub>3</sub>                                  |
| Stepronin                  | Mucolytic                    | 72324-18-6  |      | C <sub>10</sub> H <sub>11</sub> NO <sub>4</sub> S <sub>2</sub>                  |
| Stercuronium Iodide        | Muscle Relaxant              | 30033-10-4  |      | C <sub>26</sub> H <sub>43</sub> N <sub>2</sub> I                                |
| Stevaladil                 | Unclassified                 | 6535-03-1   |      | C <sub>27</sub> H <sub>45</sub> NO <sub>4</sub>                                 |
| Stilbamidine Isethionate   | Antiprotozoal                | 122-06-5    |      | C <sub>16</sub> H <sub>16</sub> N <sub>4</sub>                                  |
| Stilbazium Iodide          | Anthelminthic                | 3784-99-4   |      | C <sub>31</sub> H <sub>36</sub> IN <sub>3</sub>                                 |
| Stilonium Iodide           | Antispasmodic                | 77257-42-2  |      | C <sub>22</sub> H <sub>30</sub> INO                                             |
| Stirimazole                | Antifungal                   | 30529-16-9  |      | C <sub>14</sub> H <sub>11</sub> N <sub>3</sub> O <sub>4</sub>                   |
| Stiripentol                | Anticonvulsant               | 49763-96-4  | Y    | C <sub>14</sub> H <sub>18</sub> O <sub>3</sub>                                  |
| Stirocainide               | Antiarrhythmic               | 78372-27-7  |      | C <sub>22</sub> H <sub>34</sub> N <sub>2</sub> O                                |
| Streptomycin Sulfate       | Antibiotic                   | 57-92-1     |      | C <sub>21</sub> H <sub>39</sub> N <sub>7</sub> O <sub>12</sub>                  |
| Streptonicozid             | Antibacterial                | 4480-58-4   |      | C <sub>27</sub> H <sub>44</sub> N <sub>10</sub> O <sub>12</sub>                 |
| Streptonigrin              | Antineoplastic               | 3930-19-6   |      | C <sub>25</sub> H <sub>22</sub> N <sub>4</sub> O <sub>8</sub>                   |
| Streptozocin               | Antineoplastic               | 18883-66-4  |      | C <sub>8</sub> H <sub>15</sub> N <sub>3</sub> O <sub>7</sub>                    |
| Strinoline                 | Antiarrhythmic               | 39862-58-3  |      | C <sub>10</sub> H <sub>6</sub> N <sub>4</sub>                                   |
| Strychnine                 | Nootropic                    | 57-24-9     |      | C <sub>21</sub> H <sub>22</sub> N <sub>2</sub> O <sub>2</sub>                   |
| Subathizone                | Antibacterial                | 121-55-1    |      | C <sub>10</sub> H <sub>13</sub> N <sub>3</sub> O <sub>2</sub> S <sub>2</sub>    |
| Subendazole                | Anthelminthic                | 54340-66-8  |      | C <sub>10</sub> H <sub>5</sub> Cl <sub>3</sub> N <sub>4</sub> S <sub>3</sub>    |
| Succimer                   | Antidote                     | 304-55-2    |      | C <sub>4</sub> H <sub>6</sub> O <sub>4</sub> S <sub>2</sub>                     |
| Succinchlorimide           | Anticonvulsant               | 128-09-6    |      | C <sub>4</sub> H <sub>4</sub> ClNO <sub>2</sub>                                 |
| Succinylcholine            | Neuromuscular Blocking Agent | 306-40-1    |      | C <sub>14</sub> H <sub>30</sub> N <sub>2</sub> O <sub>42+</sub>                 |
| Succinylsulfathiazole      | Antibiotic                   | 116-43-8    |      | C <sub>13</sub> H <sub>13</sub> N <sub>3</sub> O <sub>5</sub> S <sub>2</sub>    |
| Succisulfone               | Antibiotic                   | 5934-14-5   |      | C <sub>16</sub> H <sub>16</sub> N <sub>2</sub> O <sub>5</sub> S                 |
| Suclofenide                | Anticonvulsant               | 30279-49-3  |      | C <sub>16</sub> H <sub>13</sub> ClN <sub>2</sub> O <sub>4</sub> S               |
| Sucralose                  | Antilulcerative              | 56038-13-2  |      | C <sub>12</sub> H <sub>19</sub> Cl <sub>3</sub> O <sub>8</sub>                  |
| Sucralox                   | Unclassified                 | 57-50-1     |      | C <sub>12</sub> H <sub>22</sub> O <sub>11</sub>                                 |
| Sucrosolate Potassium      | Antilulcerative              | 57680-56-5  |      | C <sub>12</sub> H <sub>22</sub> O <sub>35</sub> S <sub>8</sub>                  |
| Sudexanox                  | Antihistaminic               | 58761-87-8  |      | C <sub>21</sub> H <sub>23</sub> NO <sub>5</sub> S                               |
| Sudoxicam                  | Antiinflammatory             | 34042-85-8  |      | C <sub>13</sub> H <sub>11</sub> N <sub>3</sub> O <sub>4</sub> S <sub>2</sub>    |
| Sufentanil                 | Analgesic                    | 56030-54-7  |      | C <sub>22</sub> H <sub>30</sub> N <sub>2</sub> O <sub>2</sub> S                 |
| Sufosfamide                | Antineoplastic               | 37753-10-9  |      | C <sub>8</sub> H <sub>18</sub> ClN <sub>2</sub> O <sub>5</sub> PS               |
| Sufotidine                 | Antilulcerative              | 80343-63-1  |      | C <sub>20</sub> H <sub>31</sub> N <sub>5</sub> O <sub>3</sub> S                 |
| Sufugolix                  | Pituitary                    | 308831-61-0 |      | C <sub>36</sub> H <sub>31</sub> F <sub>2</sub> N <sub>5</sub> O <sub>4</sub> S  |
| Sulamserod                 | Antiarrhythmic               | 219757-90-1 |      | C <sub>19</sub> H <sub>28</sub> ClN <sub>3</sub> O <sub>5</sub> S               |
| Sulazepam                  | Anxiolytic                   | 2898-13-7   |      | C <sub>16</sub> H <sub>13</sub> ClN <sub>2</sub> O <sub>3</sub> S               |
| Sulazuril                  | Antibiotic                   | 108258-89-5 |      | C <sub>17</sub> H <sub>15</sub> Cl <sub>2</sub> N <sub>3</sub> O <sub>5</sub> S |
| Sulbactam Pivoxil          | Antibacterial                | 69388-79-0  |      | C <sub>14</sub> H <sub>21</sub> NO <sub>7</sub> S                               |
| Sulbactam                  | Antibiotic                   | 68373-14-8  |      | C <sub>8</sub> H <sub>11</sub> NO <sub>5</sub> S                                |
| Sulbenicillin              | Antibiotic                   | 41744-40-5  |      | C <sub>16</sub> H <sub>18</sub> N <sub>2</sub> O <sub>7</sub> S <sub>2</sub>    |
| Sulbenox                   | Steroid                      | 58095-31-1  |      | C <sub>9</sub> H <sub>10</sub> N <sub>2</sub> O <sub>2</sub> S                  |
| Sulbentine                 | Antifungal                   | 350-12-9    |      | C <sub>17</sub> H <sub>18</sub> N <sub>2</sub> S <sub>2</sub>                   |
| Sulclamide                 | Antitussive                  | 2455-92-7   |      | C <sub>7</sub> H <sub>7</sub> ClN <sub>2</sub> O <sub>3</sub> S                 |
| Sulconazole                | Antifungal                   | 61318-90-9  |      | C <sub>18</sub> H <sub>15</sub> Cl <sub>3</sub> N <sub>2</sub> S                |
| Sulfabenz                  | Antibacterial                | 127-77-5    |      | C <sub>12</sub> H <sub>12</sub> N <sub>2</sub> O <sub>2</sub> S                 |
| Sulfabenzamide             | Antibacterial                | 127-71-9    |      | C <sub>13</sub> H <sub>12</sub> N <sub>2</sub> O <sub>3</sub> S                 |
| Sulfabromomethazine Sodium | Antibiotic                   | 116-45-0    |      | C <sub>12</sub> H <sub>13</sub> BrN <sub>4</sub> O <sub>2</sub> S               |
| Sulfacarbamide             | Antibiotic                   | 547-44-4    |      | C <sub>7</sub> H <sub>9</sub> N <sub>3</sub> O <sub>3</sub> S                   |
| Sulfacecole                | Unclassified                 | 21662-79-3  |      | C <sub>14</sub> H <sub>17</sub> N <sub>3</sub> O <sub>5</sub> S                 |
| Sulfacetamide              | Antibiotic                   | 144-80-9    |      | C <sub>8</sub> H <sub>10</sub> N <sub>2</sub> O <sub>3</sub> S                  |
| Sulfachlorpyridazine       | Antibiotic                   | 80-32-0     |      | C <sub>10</sub> H <sub>9</sub> ClN <sub>4</sub> O <sub>2</sub> S                |
| Sulfachrysoidine           | Antibiotic                   | 485-41-6    |      | C <sub>13</sub> H <sub>13</sub> N <sub>5</sub> O <sub>4</sub> S                 |
| Sulfacloamide              | Antibacterial                | 4015-18-3   |      | C <sub>12</sub> H <sub>13</sub> ClN <sub>4</sub> O <sub>2</sub> S               |
| Sulfaclozazole             | Unclassified                 | 54063-55-7  |      | C <sub>16</sub> H <sub>15</sub> ClN <sub>4</sub> O <sub>2</sub> S               |
| Sulfaclozine               | Antibiotic                   | 102-65-8    |      | C <sub>10</sub> H <sub>9</sub> ClN <sub>4</sub> O <sub>2</sub> S                |
| Sulfacytine                | Antibacterial                | 17784-12-2  |      | C <sub>12</sub> H <sub>14</sub> N <sub>4</sub> O <sub>3</sub> S                 |

Table S1. Cont.

| Common Name                    | Indication       | CAS Number  | Oral | Molecular Formula                                                                            |
|--------------------------------|------------------|-------------|------|----------------------------------------------------------------------------------------------|
| Sulfadiazine                   | Antibiotic       | 68-35-9     |      | C <sub>10</sub> H <sub>10</sub> N <sub>4</sub> O <sub>2</sub> S                              |
| Sulfadiazine                   | Antibiotic       | 115-68-4    |      | C <sub>11</sub> H <sub>14</sub> N <sub>2</sub> O <sub>3</sub> S                              |
| Sulfadimethoxine               | Antibiotic       | 122-11-2    |      | C <sub>12</sub> H <sub>14</sub> N <sub>4</sub> O <sub>4</sub> S                              |
| Sulfadoxine                    | Antibiotic       | 2447-57-6   |      | C <sub>12</sub> H <sub>14</sub> N <sub>4</sub> O <sub>4</sub> S                              |
| Sulfaethidole                  | Antibiotic       | 94-19-9     |      | C <sub>10</sub> H <sub>12</sub> N <sub>4</sub> O <sub>2</sub> S <sub>2</sub>                 |
| Sulfaguanidine                 | Antibiotic       | 57-67-0     |      | C <sub>7</sub> H <sub>10</sub> N <sub>4</sub> O <sub>2</sub> S                               |
| Sulfaguanole                   | Antibiotic       | 27031-08-9  |      | C <sub>12</sub> H <sub>15</sub> N <sub>5</sub> O <sub>3</sub> S                              |
| Sulfalene                      | Antibacterial    | 152-47-6    |      | C <sub>11</sub> H <sub>12</sub> N <sub>4</sub> O <sub>3</sub> S                              |
| Sulfaloxic Acid                | Antibiotic       | 14376-16-0  |      | C <sub>16</sub> H <sub>15</sub> N <sub>3</sub> O <sub>7</sub> S                              |
| Sulfamazone                    | Antiinflammatory | 65761-24-2  |      | C <sub>23</sub> H <sub>24</sub> N <sub>6</sub> O <sub>7</sub> S <sub>2</sub>                 |
| Sulfamerazine                  | Antibiotic       | 127-79-7    |      | C <sub>11</sub> H <sub>12</sub> N <sub>4</sub> O <sub>2</sub> S                              |
| Sulfameter                     | Antibiotic       | 651-06-9    |      | C <sub>11</sub> H <sub>12</sub> N <sub>4</sub> O <sub>3</sub> S                              |
| Sulfamethazine                 | Antibiotic       | 57-68-1     |      | C <sub>12</sub> H <sub>14</sub> N <sub>4</sub> O <sub>2</sub> S                              |
| Sulfamethizole                 | Antibiotic       | 144-82-1    |      | C <sub>9</sub> H <sub>10</sub> N <sub>4</sub> O <sub>2</sub> S <sub>2</sub>                  |
| Sulfamethoxazole               | Antibiotic       | 723-46-6    |      | C <sub>10</sub> H <sub>11</sub> N <sub>3</sub> O <sub>3</sub> S                              |
| Sulfamethoxy-pyridazine        | Antibiotic       | 80-35-3     |      | C <sub>11</sub> H <sub>12</sub> N <sub>4</sub> O <sub>3</sub> S                              |
| Sulfamethoxy-pyridazine Acetyl | Antibiotic       | 3568-43-2   |      | C <sub>13</sub> H <sub>14</sub> N <sub>4</sub> O <sub>4</sub> S                              |
| Sulfametomidine                | Antibiotic       | 3772-76-7   |      | C <sub>12</sub> H <sub>14</sub> N <sub>4</sub> O <sub>3</sub> S                              |
| Sulfametrole                   | Antibiotic       | 32909-92-5  |      | C <sub>9</sub> H <sub>10</sub> N <sub>4</sub> O <sub>3</sub> S <sub>2</sub>                  |
| Sulfamonomethoxine             | Antibiotic       | 1220-83-3   |      | C <sub>11</sub> H <sub>12</sub> N <sub>4</sub> O <sub>3</sub> S                              |
| Sulfamoxole                    | Antibacterial    | 729-99-7    |      | C <sub>11</sub> H <sub>13</sub> N <sub>3</sub> O <sub>3</sub> S                              |
| Sulfanilamide                  | Antibiotic       | 63-74-1     |      | C <sub>6</sub> H <sub>8</sub> N <sub>2</sub> O <sub>2</sub> S                                |
| Sulfanilate Zinc               | Antibiotic       | 121-57-3    |      | C <sub>6</sub> H <sub>7</sub> NO <sub>3</sub> S                                              |
| Sulfantran                     | Antibacterial    | 122-16-7    |      | C <sub>14</sub> H <sub>13</sub> N <sub>3</sub> O <sub>3</sub> S                              |
| Sulfaperin                     | Antibiotic       | 599-88-2    |      | C <sub>11</sub> H <sub>12</sub> N <sub>4</sub> O <sub>2</sub> S                              |
| Sulfaphenazole                 | Antibiotic       | 526-08-9    |      | C <sub>15</sub> H <sub>14</sub> N <sub>4</sub> O <sub>2</sub> S                              |
| Sulfaproxyline                 | Antibiotic       | 116-42-7    |      | C <sub>16</sub> H <sub>18</sub> N <sub>2</sub> O <sub>4</sub> S                              |
| Sulfapyrazine                  | Antibiotic       | 116-44-9    |      | C <sub>10</sub> H <sub>10</sub> N <sub>4</sub> O <sub>2</sub> S                              |
| Sulfapyridine                  | Antibiotic       | 144-83-2    |      | C <sub>11</sub> H <sub>11</sub> N <sub>3</sub> O <sub>2</sub> S                              |
| Sulfaquinolaxine               | Antiprotozoal    | 59-40-5     |      | C <sub>14</sub> H <sub>12</sub> N <sub>4</sub> O <sub>2</sub> S                              |
| Sulfarsphenamine               | Antibacterial    | 534-93-0    |      | C <sub>14</sub> H <sub>16</sub> As <sub>2</sub> N <sub>2</sub> O <sub>8</sub> S <sub>2</sub> |
| Sulfasalazine                  | Antiinflammatory | 599-79-1    | Y    | C <sub>18</sub> H <sub>14</sub> N <sub>4</sub> O <sub>5</sub> S                              |
| Sulfasomizole                  | Antibacterial    | 632-00-8    |      | C <sub>10</sub> H <sub>11</sub> N <sub>3</sub> O <sub>2</sub> S <sub>2</sub>                 |
| Sulfasuccinamide               | Antibiotic       | 3563-14-2   |      | C <sub>10</sub> H <sub>12</sub> N <sub>2</sub> O <sub>5</sub> S                              |
| Sulfasymazine                  | Antibiotic       | 1984-94-7   |      | C <sub>13</sub> H <sub>17</sub> N <sub>5</sub> O <sub>2</sub> S                              |
| Sulfathiazole                  | Antibiotic       | 72-14-0     |      | C <sub>9</sub> H <sub>9</sub> N <sub>3</sub> O <sub>2</sub> S <sub>2</sub>                   |
| Sulfathiourea                  | Antibiotic       | 515-49-1    |      | C <sub>7</sub> H <sub>9</sub> N <sub>3</sub> O <sub>2</sub> S <sub>2</sub>                   |
| Sulfatroxazole                 | Antibacterial    | 23256-23-7  |      | C <sub>11</sub> H <sub>13</sub> N <sub>3</sub> O <sub>3</sub> S                              |
| Sulfatrozole                   | Antiprotozoal    | 13369-07-8  |      | C <sub>10</sub> H <sub>12</sub> N <sub>4</sub> O <sub>3</sub> S <sub>2</sub>                 |
| Sulfazamet                     | Antibacterial    | 852-19-7    |      | C <sub>16</sub> H <sub>16</sub> N <sub>4</sub> O <sub>2</sub> S                              |
| Sulfinalol                     | Antihypertensive | 66264-77-5  |      | C <sub>20</sub> H <sub>27</sub> NO <sub>4</sub> S                                            |
| Sulfinpyrazone                 | Antiurolithic    | 57-96-5     | Y    | C <sub>23</sub> H <sub>20</sub> N <sub>2</sub> O <sub>3</sub> S                              |
| Sulfiram                       | Ectoparasiticide | 95-05-6     |      | C <sub>10</sub> H <sub>20</sub> N <sub>2</sub> S <sub>3</sub>                                |
| Sulfisomidine                  | Antibiotic       | 515-64-0    |      | C <sub>12</sub> H <sub>14</sub> N <sub>4</sub> O <sub>2</sub> S                              |
| Sulfisoxazole                  | Antibiotic       | 127-69-5    | Y    | C <sub>11</sub> H <sub>13</sub> N <sub>3</sub> O <sub>3</sub> S                              |
| Sulfisoxazole Acetyl           | Antibacterial    | 80-74-0     |      | C <sub>13</sub> H <sub>15</sub> N <sub>3</sub> O <sub>4</sub> S                              |
| Sulfonethylmethane             | Sedative         | 76-20-0     |      | C <sub>8</sub> H <sub>18</sub> O <sub>4</sub> S <sub>2</sub>                                 |
| Sulfonmethane                  | Sedative         | 115-24-2    |      | C <sub>7</sub> H <sub>16</sub> O <sub>4</sub> S <sub>2</sub>                                 |
| Sulfonterol                    | Bronchodilator   | 42461-79-0  |      | C <sub>14</sub> H <sub>23</sub> NO <sub>4</sub> S                                            |
| Sulforidazine                  | Antipsychotic    | 14759-06-9  |      | C <sub>21</sub> H <sub>26</sub> N <sub>2</sub> O <sub>2</sub> S <sub>2</sub>                 |
| Sulfosalicylic Acid            | Antiinflammatory | 97-05-2     |      | C <sub>7</sub> H <sub>6</sub> O <sub>6</sub> S                                               |
| Sulfoxone                      | Antibiotic       | 144-76-3    |      | C <sub>14</sub> H <sub>16</sub> N <sub>2</sub> O <sub>6</sub> S <sub>3</sub>                 |
| Sulicrinat                     | Diuretic         | 90207-12-8  |      | C <sub>15</sub> H <sub>10</sub> Cl <sub>3</sub> NO <sub>6</sub> S                            |
| Sulindac                       | Antineoplastic   | 38194-50-2  | Y    | C <sub>20</sub> H <sub>17</sub> FO <sub>3</sub> S                                            |
| Sulisatin                      | Laxative         | 54935-03-4  |      | C <sub>21</sub> H <sub>17</sub> NO <sub>9</sub> S <sub>2</sub>                               |
| Sulisobenzone                  | Dermatologic     | 4065-45-6   |      | C <sub>14</sub> H <sub>12</sub> O <sub>6</sub> S                                             |
| Sulmarin                       | Hemostatic       | 29334-07-4  |      | C <sub>10</sub> H <sub>8</sub> O <sub>10</sub> S <sub>2</sub>                                |
| Sulmazole                      | Cardiotonic      | 73384-60-8  |      | C <sub>14</sub> H <sub>13</sub> N <sub>3</sub> O <sub>2</sub> S                              |
| Sulmepride                     | Gastroprokinetic | 57479-88-6  |      | C <sub>14</sub> H <sub>21</sub> N <sub>3</sub> O <sub>4</sub> S                              |
| Sulnidazole                    | Antiprotozoal    | 51022-76-5  |      | C <sub>9</sub> H <sub>14</sub> N <sub>4</sub> O <sub>3</sub> S                               |
| Sulocarbilate                  | Ophthalmic       | 121-64-2    |      | C <sub>9</sub> H <sub>12</sub> N <sub>2</sub> O <sub>5</sub> S                               |
| Suloctidil                     | Vasodilator      | 54767-75-8  |      | C <sub>20</sub> H <sub>35</sub> NOS                                                          |
| Sulofenur                      | Antineoplastic   | 110311-27-8 |      | C <sub>16</sub> H <sub>15</sub> ClN <sub>2</sub> O <sub>3</sub> S                            |

Table S1. Cont.

| Common Name           | Indication                   | CAS Number  | Oral | Molecular Formula                                                                |
|-----------------------|------------------------------|-------------|------|----------------------------------------------------------------------------------|
| Sulopenem             | Antibacterial                | 120788-07-0 |      | C <sub>12</sub> H <sub>15</sub> NO <sub>5</sub> S <sub>3</sub>                   |
| Sulosemide            | Diuretic                     | 82666-62-4  |      | C <sub>17</sub> H <sub>16</sub> N <sub>2</sub> O <sub>7</sub> S <sub>2</sub>     |
| Sulotroban            | Anticoagulant                | 72131-33-0  |      | C <sub>16</sub> H <sub>17</sub> NO <sub>5</sub> S                                |
| Suloxifen Oxalate     | Bronchodilator               | 25827-12-7  |      | C <sub>18</sub> H <sub>24</sub> N <sub>2</sub> O <sub>5</sub> S                  |
| Sulpiride             | Antipsychotic                | 15676-16-1  | Y    | C <sub>15</sub> H <sub>23</sub> N <sub>3</sub> O <sub>4</sub> S                  |
| Sulprosal             | Unclassified                 | 58703-77-8  |      | C <sub>10</sub> H <sub>12</sub> O <sub>6</sub> S                                 |
| Sulprostone           | Prostaglandin                | 60325-46-4  |      | C <sub>23</sub> H <sub>31</sub> NO <sub>7</sub> S                                |
| Sultamicillin         | Antibacterial                | 76497-13-7  |      | C <sub>25</sub> H <sub>30</sub> N <sub>4</sub> O <sub>9</sub> S <sub>2</sub>     |
| Sulthiame             | Anticonvulsant               | 61-56-3     |      | C <sub>10</sub> H <sub>14</sub> N <sub>2</sub> O <sub>4</sub> S <sub>2</sub>     |
| Sultopride            | Antipsychotic                | 53583-79-2  | Y    | C <sub>17</sub> H <sub>26</sub> N <sub>2</sub> O <sub>4</sub> S                  |
| Sultosilic Acid       | Antihyperlipidemic           | 57775-26-5  |      | C <sub>13</sub> H <sub>12</sub> O <sub>7</sub> S <sub>2</sub>                    |
| Sultroponium          | Antispasmodic                | 15130-91-3  |      | C <sub>20</sub> H <sub>29</sub> NO <sub>6</sub> S                                |
| Sulukast              | Bronchodilator               | 98116-53-1  |      | C <sub>25</sub> H <sub>36</sub> N <sub>4</sub> O <sub>5</sub> S                  |
| Sulverapride          | Antiemetic                   | 73747-20-3  |      | C <sub>16</sub> H <sub>25</sub> N <sub>3</sub> O <sub>5</sub> S                  |
| Sumacetamol           | Analgesic                    | 69217-67-0  |      | C <sub>15</sub> H <sub>20</sub> N <sub>2</sub> O <sub>4</sub> S                  |
| Sumanriole            | Antiparkinsonian             | 179386-43-7 |      | C <sub>11</sub> H <sub>13</sub> N <sub>3</sub> O                                 |
| Sumarotene            | Dermatologic                 | 105687-93-2 |      | C <sub>24</sub> H <sub>30</sub> O <sub>2</sub> S                                 |
| Sumatriptan           | Antimigraine                 | 103628-46-2 |      | C <sub>14</sub> H <sub>21</sub> N <sub>3</sub> O <sub>2</sub> S                  |
| Sumetizide            | Antidiabetic                 | 32059-27-1  |      | C <sub>12</sub> H <sub>13</sub> ClN <sub>4</sub> O <sub>6</sub> S <sub>2</sub>   |
| Sunagrel              | Anticoagulant                | 85418-85-5  |      | C <sub>25</sub> H <sub>32</sub> N <sub>2</sub> O <sub>2</sub> S                  |
| Suncillin Sodium      | Antibacterial                | 22164-94-9  |      | C <sub>16</sub> H <sub>19</sub> N <sub>3</sub> O <sub>7</sub> S <sub>2</sub>     |
| Sunepitron            | Antidepressant               | 131831-03-3 |      | C <sub>17</sub> H <sub>24</sub> ClN <sub>5</sub> O <sub>2</sub>                  |
| Sunitinib             | Antineoplastic               | 557795-19-4 | Y    | C <sub>22</sub> H <sub>27</sub> FN <sub>4</sub> O <sub>2</sub>                   |
| Supidimide            | Sedative                     | 49785-74-2  |      | C <sub>12</sub> H <sub>12</sub> N <sub>2</sub> O <sub>4</sub> S                  |
| Suplatast Tosilate    | Antihistaminic               | 94055-76-2  | Y    | C <sub>23</sub> H <sub>33</sub> NO <sub>7</sub> S <sub>2</sub>                   |
| Suproclone            | Sedative                     | 76535-71-2  |      | C <sub>22</sub> H <sub>22</sub> ClN <sub>5</sub> O <sub>4</sub> S <sub>2</sub>   |
| Suprofen              | Antiinflammatory             | 40828-46-4  |      | C <sub>14</sub> H <sub>12</sub> O <sub>3</sub> S                                 |
| Suricainide Maleate   | Antiarrhythmic               | 85053-46-9  |      | C <sub>18</sub> H <sub>31</sub> N <sub>3</sub> O <sub>3</sub> S                  |
| Suriclone             | Anxiolytic                   | 53813-83-5  |      | C <sub>20</sub> H <sub>20</sub> ClN <sub>5</sub> O <sub>3</sub> S <sub>2</sub>   |
| Surinabant            | Antibiotic                   | 288104-79-0 |      | C <sub>23</sub> H <sub>23</sub> Br <sub>2</sub> Cl <sub>2</sub> N <sub>4</sub> O |
| Suritazole            | Antidepressant               | 110623-33-1 |      | C <sub>10</sub> H <sub>10</sub> FN <sub>3</sub> S                                |
| Suronacrine Maleate   | Neuromuscular Blocking Agent | 104675-35-6 |      | C <sub>20</sub> H <sub>20</sub> N <sub>2</sub> O                                 |
| Susalimod             | Immunomodulator              | 149556-49-0 |      | C <sub>21</sub> H <sub>16</sub> N <sub>2</sub> O <sub>5</sub> S                  |
| Suxamethonium Bromide | Muscle Relaxant              | 55-94-7     |      | C <sub>14</sub> H <sub>30</sub> Br <sub>2</sub> N <sub>2</sub> O <sub>4</sub>    |
| Suxemerid Sulfate     | Antitussive                  | 47662-15-7  |      | C <sub>24</sub> H <sub>44</sub> N <sub>2</sub> O <sub>4</sub>                    |
| Suxethonium Chloride  | Neuromuscular Blocking Agent | 54063-57-9  |      | C <sub>16</sub> H <sub>34</sub> Cl <sub>2</sub> N <sub>2</sub> O <sub>4</sub>    |
| Suxibuzone            | Antiinflammatory             | 27470-51-5  |      | C <sub>24</sub> H <sub>26</sub> N <sub>2</sub> O <sub>6</sub>                    |
| Symclosene            | Antibacterial                | 87-90-1     |      | C <sub>3</sub> Cl <sub>3</sub> N <sub>3</sub> O <sub>3</sub>                     |
| Symetine              | Antiamoebic                  | 15599-45-8  |      | C <sub>30</sub> H <sub>48</sub> N <sub>2</sub> O <sub>2</sub>                    |
| Syrosingopine         | Antihypertensive             | 84-36-6     |      | C <sub>35</sub> H <sub>42</sub> N <sub>2</sub> O <sub>11</sub>                   |
| Tabilautide           | Immunomodulator              | 78088-46-7  |      | C <sub>27</sub> H <sub>49</sub> N <sub>5</sub> O <sub>8</sub>                    |
| Tabimorelin           | Cardiotonic                  | 193079-69-5 |      | C <sub>32</sub> H <sub>40</sub> N <sub>4</sub> O <sub>3</sub>                    |
| Tacalcitol            | Dermatologic                 | 57333-96-7  |      | C <sub>27</sub> H <sub>44</sub> O <sub>3</sub>                                   |
| Tacapenem             | Antibiotic                   | 193811-33-5 |      | C <sub>14</sub> H <sub>18</sub> N <sub>2</sub> O <sub>5</sub> S                  |
| Tacedinaline          | Antineoplastic               | 112522-64-2 |      | C <sub>15</sub> H <sub>15</sub> N <sub>3</sub> O <sub>2</sub>                    |
| Taclamine             | Anxiolytic                   | 34061-33-1  |      | C <sub>21</sub> H <sub>23</sub> N                                                |
| Tacrine               | Nootropic                    | 321-64-2    | Y    | C <sub>13</sub> H <sub>14</sub> N <sub>2</sub>                                   |
| Tacrolimus            | Immunosuppressant            | 104987-11-3 | Y    | C <sub>44</sub> H <sub>69</sub> NO <sub>12</sub>                                 |
| Tadalafil             | Erectile Dysfunction         | 171596-29-5 | Y    | C <sub>22</sub> H <sub>19</sub> N <sub>3</sub> O <sub>4</sub>                    |
| Tafenoquine           | Antimalarial                 | 106635-80-7 |      | C <sub>24</sub> H <sub>28</sub> F <sub>3</sub> N <sub>3</sub> O <sub>3</sub>     |
| Tafluprost            | Prostaglandin                | 209860-87-7 |      | C <sub>25</sub> H <sub>34</sub> F <sub>2</sub> O <sub>5</sub>                    |
| Taglutimide           | Sedative                     | 14166-26-8  |      | C <sub>14</sub> H <sub>16</sub> N <sub>2</sub> O <sub>4</sub>                    |
| Tagorizine            | Antihistaminic               | 118420-47-6 |      | C <sub>30</sub> H <sub>36</sub> N <sub>4</sub> O                                 |
| Talabostat            | Hematinic                    | 149682-77-9 |      | C <sub>9</sub> H <sub>19</sub> BN <sub>2</sub> O <sub>3</sub>                    |
| Talaglumetad          | Antineoplastic               | 441765-98-6 |      | C <sub>11</sub> H <sub>16</sub> N <sub>2</sub> O <sub>5</sub>                    |
| Talampanel            | Antiseizure                  | 161832-65-1 |      | C <sub>19</sub> H <sub>19</sub> N <sub>3</sub> O <sub>3</sub>                    |
| Talampicillin         | Antibacterial                | 47747-56-8  |      | C <sub>24</sub> H <sub>23</sub> N <sub>3</sub> O <sub>6</sub> S                  |
| Talaporfin Sodium     | Antineoplastic               | 110230-98-3 |      | C <sub>38</sub> H <sub>41</sub> N <sub>5</sub> O <sub>9</sub>                    |
| Talastine             | Antihistaminic               | 16188-61-7  |      | C <sub>19</sub> H <sub>21</sub> N <sub>3</sub> O                                 |
| Talbutal              | Sedative                     | 115-44-6    |      | C <sub>11</sub> H <sub>16</sub> N <sub>2</sub> O <sub>3</sub>                    |
| Taleranol             | Pituitary                    | 42422-68-4  |      | C <sub>18</sub> H <sub>26</sub> O <sub>5</sub>                                   |



Table S1. Cont.

| Common Name           | Indication         | CAS Number  | Oral | Molecular Formula                                                              |
|-----------------------|--------------------|-------------|------|--------------------------------------------------------------------------------|
| Talibegron            | Antiobesity        | 146376-58-1 |      | C <sub>18</sub> H <sub>21</sub> NO <sub>4</sub>                                |
| Talinolol             | Antihypertensive   | 57460-41-0  | Y    | C <sub>20</sub> H <sub>33</sub> N <sub>3</sub> O <sub>3</sub>                  |
| Talipexole            | Antiparkinsonian   | 101626-70-4 | Y    | C <sub>10</sub> H <sub>15</sub> N <sub>3</sub> S                               |
| Tallimustine          | Antineoplastic     | 115308-98-0 |      | C <sub>32</sub> H <sub>38</sub> Cl <sub>2</sub> N <sub>10</sub> O <sub>4</sub> |
| Talmetacin            | Analgesic          | 67489-39-8  |      | C <sub>27</sub> H <sub>20</sub> ClNO <sub>6</sub>                              |
| Talmetoprim           | Antibiotic         | 66093-35-4  |      | C <sub>22</sub> H <sub>20</sub> N <sub>4</sub> O <sub>5</sub>                  |
| Talnetant             | Antispasmodic      | 174636-32-9 |      | C <sub>25</sub> H <sub>22</sub> N <sub>2</sub> O <sub>2</sub>                  |
| Talniflumate          | Antiinflammatory   | 66898-62-2  | Y    | C <sub>21</sub> H <sub>13</sub> F <sub>3</sub> N <sub>2</sub> O <sub>4</sub>   |
| Talopram              | Antidepressant     | 7182-51-6   |      | C <sub>20</sub> H <sub>25</sub> NO                                             |
| Talosalate            | Analgesic          | 66898-60-0  |      | C <sub>17</sub> H <sub>12</sub> O <sub>6</sub>                                 |
| Talotrexin Ammonium   | Antineoplastic     | 113857-87-7 |      | C <sub>27</sub> H <sub>27</sub> N <sub>9</sub> O <sub>6</sub>                  |
| Taloximine            | Bronchodilator     | 17243-68-4  |      | C <sub>12</sub> H <sub>16</sub> N <sub>4</sub> O <sub>2</sub>                  |
| Talsaclidine Fumarate | Nootropic          | 147025-53-4 |      | C <sub>10</sub> H <sub>15</sub> NO                                             |
| Talsupram             | Antidepressant     | 21489-20-3  | Y    | C <sub>20</sub> H <sub>25</sub> NS                                             |
| Taltirelin            | Pituitary          | 103300-74-9 | Y    | C <sub>17</sub> H <sub>23</sub> N <sub>7</sub> O <sub>5</sub>                  |
| Taltobulin            | Antineoplastic     | 228266-40-8 |      | C <sub>27</sub> H <sub>43</sub> N <sub>3</sub> O <sub>4</sub>                  |
| Taltrimide            | Anticonvulsant     | 81428-04-8  |      | C <sub>13</sub> H <sub>16</sub> N <sub>2</sub> O <sub>4</sub> S                |
| Talviraline           | Antiviral          | 163451-80-7 |      | C <sub>15</sub> H <sub>20</sub> N <sub>2</sub> O <sub>3</sub> S <sub>2</sub>   |
| Tameridone            | Sedative           | 102144-78-5 |      | C <sub>22</sub> H <sub>26</sub> N <sub>6</sub> O <sub>2</sub>                  |
| Tameticillin          | Antibacterial      | 56211-43-9  |      | C <sub>23</sub> H <sub>33</sub> N <sub>3</sub> O <sub>6</sub> S                |
| Tametriline           | Antidepressant     | 52795-02-5  |      | C <sub>17</sub> H <sub>19</sub> N                                              |
| Tamibarotene          | Immunomodulator    | 94497-51-5  | Y    | C <sub>22</sub> H <sub>25</sub> NO <sub>3</sub>                                |
| Tamitinol             | Nootropic          | 59429-50-4  |      | C <sub>11</sub> H <sub>18</sub> N <sub>2</sub> OS                              |
| Tamolarizine          | Vasodilator        | 93035-32-6  |      | C <sub>27</sub> H <sub>32</sub> N <sub>2</sub> O <sub>3</sub>                  |
| Tamoxifen             | Antineoplastic     | 10540-29-1  | Y    | C <sub>26</sub> H <sub>29</sub> NO                                             |
| Tampramine Fumarate   | Antidepressant     | 83166-17-0  |      | C <sub>23</sub> H <sub>24</sub> N <sub>4</sub>                                 |
| Tamsulosin            | Antineoplastic     | 106133-20-4 | Y    | C <sub>20</sub> H <sub>28</sub> N <sub>2</sub> O <sub>5</sub> S                |
| Tanaproget            | Contraceptive      | 304853-42-7 |      | C <sub>16</sub> H <sub>15</sub> N <sub>3</sub> OS                              |
| Tandamine             | Antidepressant     | 42408-80-0  |      | C <sub>18</sub> H <sub>26</sub> N <sub>2</sub> S                               |
| Tandospirone Citrate  | Anxiolytic         | 87760-53-0  | Y    | C <sub>21</sub> H <sub>29</sub> N <sub>5</sub> O <sub>2</sub>                  |
| Tandutinib            | Antineoplastic     | 387867-13-2 |      | C <sub>31</sub> H <sub>42</sub> N <sub>6</sub> O <sub>4</sub>                  |
| Taniplon              | Sedative           | 106073-01-2 |      | C <sub>14</sub> H <sub>15</sub> N <sub>5</sub> O <sub>2</sub>                  |
| Tanogitran            | Unclassified       | 637328-69-9 |      | C <sub>25</sub> H <sub>31</sub> N <sub>7</sub> O <sub>3</sub>                  |
| Tanomastat            | Antirheumatic      | 179545-77-8 |      | C <sub>23</sub> H <sub>19</sub> ClO <sub>3</sub> S                             |
| Tapentadol            | Analgesic          | 175591-23-8 | Y    | C <sub>14</sub> H <sub>23</sub> NO                                             |
| Taprizosin            | Antihypertensive   | 210538-44-6 |      | C <sub>25</sub> H <sub>26</sub> N <sub>6</sub> O <sub>4</sub> S                |
| Taprostene            | Antithrombotic     | 108945-35-3 |      | C <sub>24</sub> H <sub>30</sub> O <sub>5</sub>                                 |
| Tarazepide            | Antispasmodic      | 141374-81-4 |      | C <sub>28</sub> H <sub>24</sub> N <sub>4</sub> O <sub>2</sub>                  |
| Tariquidar            | Antineoplastic     | 206873-63-4 |      | C <sub>38</sub> H <sub>38</sub> N <sub>4</sub> O <sub>6</sub>                  |
| Tartaric Acid         | Antibacterial      | 87-69-4     |      | C <sub>4</sub> H <sub>6</sub> O <sub>6</sub>                                   |
| Tasidotin             | Antineoplastic     | 192658-64-3 |      | C <sub>32</sub> H <sub>58</sub> N <sub>6</sub> O <sub>5</sub>                  |
| Tasosartan            | Antihypertensive   | 145733-36-4 |      | C <sub>23</sub> H <sub>21</sub> N <sub>7</sub> O                               |
| Tasquinimod           | Nootropic          | 254964-60-8 | Y    | C <sub>20</sub> H <sub>17</sub> F <sub>3</sub> N <sub>2</sub> O <sub>4</sub>   |
| Tasuldine             | Mucolytic          | 88579-39-9  |      | C <sub>10</sub> H <sub>9</sub> N <sub>3</sub> S                                |
| Taurocholic Acid      | Choleretic         | 81-24-3     |      | C <sub>26</sub> H <sub>45</sub> NO <sub>7</sub> S                              |
| Taurolidine           | Antibacterial      | 19388-87-5  |      | C <sub>7</sub> H <sub>16</sub> N <sub>4</sub> O <sub>4</sub> S <sub>2</sub>    |
| Tauromustine          | Antineoplastic     | 85977-49-7  |      | C <sub>7</sub> H <sub>15</sub> ClN <sub>4</sub> O <sub>4</sub> S               |
| Tauroselcholic Acid   | Gastroprokinetic   | 75018-71-2  |      | C <sub>26</sub> H <sub>45</sub> NO <sub>7</sub> SSe                            |
| Taurosteine           | Mucolytic          | 124066-33-7 |      | C <sub>7</sub> H <sub>9</sub> NO <sub>4</sub> S <sub>2</sub>                   |
| Taurultam             | Antineoplastic     | 38668-01-8  |      | C <sub>3</sub> H <sub>8</sub> N <sub>2</sub> O <sub>2</sub> S                  |
| Tazadolene Succinate  | Analgesic          | 87936-75-2  |      | C <sub>16</sub> H <sub>21</sub> N                                              |
| Tazanolast            | Antihistaminic     | 82989-25-1  |      | C <sub>13</sub> H <sub>15</sub> N <sub>5</sub> O <sub>3</sub>                  |
| Tazarotene            | Dermatologic       | 118292-40-3 |      | C <sub>21</sub> H <sub>21</sub> NO <sub>2</sub> S                              |
| Tazasubrate           | Antihyperlipidemic | 79071-15-1  |      | C <sub>18</sub> H <sub>17</sub> NO <sub>3</sub> S <sub>2</sub>                 |
| Tazeprofen            | Antiinflammatory   | 76816-33-6  |      | C <sub>16</sub> H <sub>13</sub> NO <sub>2</sub> S                              |
| Tazifylline           | Antihistaminic     | 79712-55-3  |      | C <sub>23</sub> H <sub>32</sub> N <sub>6</sub> O <sub>3</sub> S                |
| Taziprinone           | Cardiotonic        | 79253-92-2  |      | C <sub>22</sub> H <sub>31</sub> N <sub>3</sub> O <sub>3</sub>                  |
| Tazobactam            | Antibiotic         | 89786-04-9  |      | C <sub>10</sub> H <sub>12</sub> N <sub>4</sub> O <sub>5</sub> S                |
| Tazofelone            | Immunomodulator    | 107902-67-0 |      | C <sub>18</sub> H <sub>27</sub> NO <sub>2</sub> S                              |
| Tazolol               | Cardiotonic        | 39832-48-9  |      | C <sub>9</sub> H <sub>16</sub> N <sub>2</sub> O <sub>2</sub> S                 |
| Tazomeline Citrate    | Nootropic          | 131987-54-7 |      | C <sub>14</sub> H <sub>23</sub> N <sub>3</sub> S <sub>2</sub>                  |
| Tebanicline Tosylate  | Analgesic          | 198283-73-7 |      | C <sub>9</sub> H <sub>11</sub> ClN <sub>2</sub> O                              |
| Tebatizole            | Antiurolytic       | 54147-28-3  |      | C <sub>12</sub> H <sub>21</sub> N <sub>3</sub> S                               |

Table S1. Cont.

| Common Name                   | Indication         | CAS Number  | Oral | Molecular Formula                                                                          |
|-------------------------------|--------------------|-------------|------|--------------------------------------------------------------------------------------------|
| Tebipenem Pivoxil             | Antibiotic         | 161715-24-8 | Y    | C <sub>22</sub> H <sub>31</sub> N <sub>3</sub> O <sub>6</sub> S <sub>2</sub>               |
| Tebufelone                    | Analgesic          | 112018-00-5 |      | C <sub>20</sub> H <sub>28</sub> O <sub>2</sub>                                             |
| Tebuquine                     | Antimalarial       | 74129-03-6  |      | C <sub>26</sub> H <sub>25</sub> Cl <sub>2</sub> N <sub>3</sub> O                           |
| Tecadenoson                   | Antiarrhythmic     | 204512-90-3 |      | C <sub>14</sub> H <sub>19</sub> N <sub>5</sub> O                                           |
| Tecalcet                      | Pituitary          | 148717-54-8 |      | C <sub>18</sub> H <sub>22</sub> ClNO                                                       |
| Tecastemizole                 | Antihistaminic     | 75970-99-9  |      | C <sub>19</sub> H <sub>21</sub> FN <sub>4</sub>                                            |
| Teclotiazide                  | Diuretic           | 4267-05-4   |      | C <sub>8</sub> H <sub>7</sub> Cl <sub>4</sub> N <sub>3</sub> O <sub>4</sub> S <sub>2</sub> |
| Teclozan                      | Antiamoebic        | 5560-78-1   |      | C <sub>20</sub> H <sub>28</sub> Cl <sub>4</sub> N <sub>2</sub> O <sub>4</sub>              |
| Tedisamil                     | Antiarrhythmic     | 90961-53-8  |      | C <sub>19</sub> H <sub>32</sub> N <sub>2</sub>                                             |
| Tefazoline                    | Adrenergic         | 1082-56-0   |      | C <sub>14</sub> H <sub>18</sub> N <sub>2</sub>                                             |
| Tefenperate                   | Unclassified       | 77342-26-8  |      | C <sub>29</sub> H <sub>37</sub> Cl <sub>2</sub> N <sub>2</sub> O <sub>4</sub>              |
| Tefludazine                   | Antipsychotic      | 80273-79-6  |      | C <sub>22</sub> H <sub>24</sub> F <sub>4</sub> N <sub>2</sub> O                            |
| Teflurane                     | Anesthetic         | 124-72-1    |      | C <sub>2</sub> HBrF <sub>4</sub>                                                           |
| Teflutixol                    | Antipsychotic      | 55837-23-5  |      | C <sub>23</sub> H <sub>26</sub> F <sub>4</sub> N <sub>2</sub> OS                           |
| Tegafur                       | Antineoplastic     | 17902-23-7  | Y    | C <sub>8</sub> H <sub>9</sub> FN <sub>2</sub> O <sub>3</sub>                               |
| Tegaserod                     | Gastroprokinetic   | 145158-71-0 | Y    | C <sub>16</sub> H <sub>23</sub> N <sub>5</sub> O                                           |
| Teglicar                      | Unclassified       | 250694-07-6 |      | C <sub>22</sub> H <sub>45</sub> N <sub>3</sub> O <sub>3</sub>                              |
| Telbivudine                   | Antiviral          | 3424-98-4   | Y    | C <sub>10</sub> H <sub>14</sub> N <sub>2</sub> O <sub>5</sub>                              |
| Telenzepine                   | Antiulcerative     | 80880-90-6  |      | C <sub>19</sub> H <sub>22</sub> N <sub>4</sub> O <sub>2</sub> S                            |
| Telinavir                     | Antiviral          | 143224-34-4 |      | C <sub>33</sub> H <sub>44</sub> N <sub>6</sub> O <sub>5</sub>                              |
| Telithromycin                 | Antibiotic         | 191114-48-4 | Y    | C <sub>43</sub> H <sub>65</sub> N <sub>5</sub> O <sub>10</sub>                             |
| Telmesteine                   | Mucolytic          | 122946-43-4 |      | C <sub>7</sub> H <sub>11</sub> NO <sub>4</sub> S                                           |
| Telmisartan                   | Antihypertensive   | 144701-48-4 | Y    | C <sub>33</sub> H <sub>30</sub> N <sub>4</sub> O <sub>2</sub>                              |
| Teloxantrone                  | Antineoplastic     | 91441-48-4  |      | C <sub>21</sub> H <sub>25</sub> N <sub>5</sub> O <sub>4</sub>                              |
| Teludipine                    | Antihypertensive   | 108687-08-7 |      | C <sub>28</sub> H <sub>38</sub> N <sub>2</sub> O <sub>6</sub>                              |
| Temafloxacin                  | Antibacterial      | 108319-06-8 |      | C <sub>21</sub> H <sub>18</sub> F <sub>3</sub> N <sub>3</sub> O <sub>3</sub>               |
| Temarotene                    | Immunomodulator    | 75078-91-0  |      | C <sub>23</sub> H <sub>28</sub>                                                            |
| Temazepam                     | Sedative           | 846-50-4    | Y    | C <sub>16</sub> H <sub>13</sub> ClN <sub>2</sub> O <sub>2</sub>                            |
| Temefos                       | Ectoparasiticide   | 3383-96-8   | Y    | C <sub>16</sub> H <sub>20</sub> O <sub>6</sub> P <sub>2</sub> S <sub>3</sub>               |
| Temelastine                   | Antihistaminic     | 86181-42-2  |      | C <sub>21</sub> H <sub>24</sub> BrN <sub>5</sub> O                                         |
| Temiverine                    | Antispasmodic      | 173324-94-2 |      | C <sub>24</sub> H <sub>35</sub> NO <sub>3</sub>                                            |
| Temocapril                    | Antihypertensive   | 111902-57-9 | Y    | C <sub>23</sub> H <sub>28</sub> N <sub>2</sub> O <sub>5</sub> S <sub>2</sub>               |
| Temocaprilat                  | Antihypertensive   | 110221-53-9 |      | C <sub>21</sub> H <sub>24</sub> N <sub>2</sub> O <sub>5</sub> S <sub>2</sub>               |
| Temocillin                    | Antibacterial      | 66148-78-5  |      | C <sub>16</sub> H <sub>18</sub> N <sub>2</sub> O <sub>7</sub> S <sub>2</sub>               |
| Temodox                       | Steroid            | 34499-96-2  |      | C <sub>12</sub> H <sub>12</sub> N <sub>2</sub> O <sub>5</sub>                              |
| Temporfin                     | Antineoplastic     | 122341-38-2 |      | C <sub>44</sub> H <sub>32</sub> N <sub>4</sub> O <sub>4</sub>                              |
| Temozolomide                  | Antineoplastic     | 85622-93-1  | Y    | C <sub>6</sub> H <sub>6</sub> N <sub>6</sub> O <sub>2</sub>                                |
| Tenamfetamine                 | Nootropic          | 4764-17-4   |      | C <sub>10</sub> H <sub>13</sub> NO <sub>2</sub>                                            |
| Tenatoprazole                 | Antihypertensive   | 113712-98-4 |      | C <sub>16</sub> H <sub>18</sub> N <sub>4</sub> O <sub>3</sub> S                            |
| Tenidap                       | Antiinflammatory   | 120210-48-2 |      | C <sub>14</sub> H <sub>9</sub> ClN <sub>2</sub> O <sub>3</sub> S                           |
| Tenilapine                    | Antipsychotic      | 82650-83-7  |      | C <sub>17</sub> H <sub>16</sub> N <sub>4</sub> S <sub>2</sub>                              |
| Teniloxazine                  | Antidepressant     | 62473-79-4  |      | C <sub>16</sub> H <sub>19</sub> NO <sub>2</sub> S                                          |
| Tenilsetam                    | Nootropic          | 86696-86-8  |      | C <sub>8</sub> H <sub>10</sub> N <sub>2</sub> OS                                           |
| Teniposide                    | Antineoplastic     | 29767-20-2  | Y    | C <sub>32</sub> H <sub>32</sub> O <sub>13</sub> S                                          |
| Tenivastatin Calcium          | Antihyperlipidemic | 121009-77-6 |      | C <sub>25</sub> H <sub>40</sub> O <sub>6</sub>                                             |
| Tenocyclidine                 | Antiparkinsonian   | 21500-98-1  |      | C <sub>15</sub> H <sub>23</sub> NS                                                         |
| Tenofovir                     | Antiviral          | 147127-20-6 | Y    | C <sub>9</sub> H <sub>14</sub> N <sub>5</sub> O <sub>4</sub> P                             |
| Tenofovir Disoproxil Fumarate | Antiviral          | 201341-05-1 | Y    | C <sub>19</sub> H <sub>30</sub> N <sub>5</sub> O <sub>10</sub> P                           |
| Tenonitrozole                 | Antiprotozoal      | 3810-35-3   |      | C <sub>8</sub> H <sub>5</sub> N <sub>3</sub> O <sub>3</sub> S <sub>2</sub>                 |
| Tenosal                       | Unclassified       | 95232-68-1  |      | C <sub>12</sub> H <sub>8</sub> O <sub>4</sub> S                                            |
| Tenosiprol                    | Antiinflammatory   | 129336-81-8 |      | C <sub>10</sub> H <sub>11</sub> NO <sub>4</sub> S                                          |
| Tenoxicam                     | Antiinflammatory   | 59804-37-4  | Y    | C <sub>13</sub> H <sub>11</sub> N <sub>3</sub> O <sub>4</sub> S <sub>2</sub>               |
| Tenylidone                    | Diuretic           | 893-01-6    |      | C <sub>16</sub> H <sub>14</sub> OS <sub>2</sub>                                            |
| Teopranitol                   | Vasodilator        | 81792-35-0  |      | C <sub>16</sub> H <sub>22</sub> N <sub>6</sub> O <sub>7</sub>                              |
| Teoprolol                     | Antihypertensive   | 65184-10-3  |      | C <sub>23</sub> H <sub>30</sub> N <sub>6</sub> O <sub>4</sub>                              |
| Tepirindole                   | Nootropic          | 72808-81-2  |      | C <sub>16</sub> H <sub>19</sub> ClN <sub>2</sub>                                           |
| Tepoxalin                     | Dermatologic       | 103475-41-8 |      | C <sub>20</sub> H <sub>20</sub> ClN <sub>3</sub> O <sub>3</sub>                            |
| Teprenone                     | Antiulcerative     | 6809-52-5   | Y    | C <sub>23</sub> H <sub>38</sub> O                                                          |
| Terazosin                     | Antihypertensive   | 63590-64-7  | Y    | C <sub>19</sub> H <sub>25</sub> N <sub>5</sub> O <sub>4</sub>                              |
| Terbequinil                   | Antipsychotic      | 113079-82-6 |      | C <sub>15</sub> H <sub>18</sub> N <sub>2</sub> O <sub>3</sub>                              |
| Terbinafine                   | Antifungal         | 91161-71-6  | Y    | C <sub>21</sub> H <sub>25</sub> N                                                          |
| Terbogrel                     | Antithrombotic     | 149979-74-8 |      | C <sub>23</sub> H <sub>27</sub> N <sub>5</sub> O <sub>2</sub>                              |
| Terbucromil                   | Antihistaminic     | 37456-21-6  |      | C <sub>18</sub> H <sub>22</sub> O <sub>4</sub>                                             |

Table S1. Cont.

| Common Name           | Indication         | CAS Number  | Oral | Molecular Formula                                                             |
|-----------------------|--------------------|-------------|------|-------------------------------------------------------------------------------|
| Terbufibrol           | Antihyperlipidemic | 56488-59-6  |      | C <sub>20</sub> H <sub>24</sub> O <sub>5</sub>                                |
| Terbuficin            | Unclassified       | 15534-92-6  |      | C <sub>30</sub> H <sub>44</sub> O <sub>4</sub>                                |
| Terbuprol             | Choleretic         | 13021-53-9  |      | C <sub>8</sub> H <sub>18</sub> O <sub>3</sub>                                 |
| Terbutaline           | Bronchodilator     | 23031-25-6  | Y    | C <sub>12</sub> H <sub>19</sub> NO <sub>3</sub>                               |
| Terciprazine          | Antipsychotic      | 56693-15-3  |      | C <sub>22</sub> H <sub>29</sub> F <sub>3</sub> N <sub>2</sub> O <sub>2</sub>  |
| Terconazole           | Antifungal         | 67915-31-5  |      | C <sub>26</sub> H <sub>31</sub> Cl <sub>2</sub> N <sub>5</sub> O <sub>3</sub> |
| Terdecamycin          | Antibacterial      | 113167-61-6 |      | C <sub>31</sub> H <sub>43</sub> N <sub>3</sub> O <sub>8</sub>                 |
| Terestigmine          | Muscle Relaxant    | 147650-57-5 |      | C <sub>21</sub> H <sub>33</sub> N <sub>3</sub> O <sub>3</sub>                 |
| Terfenadine           | Antihistaminic     | 50679-08-8  |      | C <sub>32</sub> H <sub>41</sub> NO <sub>2</sub>                               |
| Terflavoxate          | Muscle Relaxant    | 86433-40-1  |      | C <sub>26</sub> H <sub>29</sub> NO <sub>4</sub>                               |
| Terfluranol           | Steroid            | 64396-09-4  |      | C <sub>17</sub> H <sub>17</sub> F <sub>3</sub> O <sub>2</sub>                 |
| Terguride             | Antiparkinsonian   | 37686-84-3  | Y    | C <sub>20</sub> H <sub>28</sub> N <sub>4</sub> O                              |
| Teriflunomide         | Antirheumatic      | 163451-81-8 | Y    | C <sub>12</sub> H <sub>9</sub> F <sub>3</sub> N <sub>2</sub> O <sub>2</sub>   |
| Terikalant            | Antiarrhythmic     | 132338-79-5 |      | C <sub>24</sub> H <sub>31</sub> NO <sub>3</sub>                               |
| Terizidone            | Antibacterial      | 25683-71-0  |      | C <sub>14</sub> H <sub>14</sub> N <sub>4</sub> O <sub>4</sub>                 |
| Terlakiren            | Antihypertensive   | 119625-78-4 |      | C <sub>31</sub> H <sub>48</sub> N <sub>4</sub> O <sub>7</sub> S               |
| Ternidazole           | Antiprotozoal      | 1077-93-6   |      | C <sub>7</sub> H <sub>11</sub> N <sub>3</sub> O <sub>3</sub>                  |
| Terodiline            | Vasodilator        | 15793-40-5  |      | C <sub>20</sub> H <sub>27</sub> N                                             |
| Terofenamate          | Antiinflammatory   | 29098-15-5  |      | C <sub>17</sub> H <sub>17</sub> Cl <sub>2</sub> NO <sub>3</sub>               |
| Teroxalene            | Unclassified       | 14728-33-7  |      | C <sub>28</sub> H <sub>41</sub> ClN <sub>2</sub> O                            |
| Teroxirone            | Antineoplastic     | 59653-73-5  |      | C <sub>12</sub> H <sub>15</sub> N <sub>3</sub> O <sub>6</sub>                 |
| Terpin                | Expectorant        | 80-53-5     |      | C <sub>10</sub> H <sub>20</sub> O <sub>2</sub>                                |
| Tertatolol            | Antihypertensive   | 83688-84-0  | Y    | C <sub>16</sub> H <sub>25</sub> NO <sub>2</sub> S                             |
| Terutroban            | Antithrombotic     | 165538-40-9 | Y    | C <sub>20</sub> H <sub>22</sub> ClNO <sub>4</sub> S                           |
| Tesaglitazar          | Antidiabetic       | 251565-85-2 |      | C <sub>20</sub> H <sub>24</sub> O <sub>7</sub> S                              |
| Tesetaxel             | Antineoplastic     | 333754-36-2 |      | C <sub>46</sub> H <sub>60</sub> FN <sub>3</sub> O <sub>13</sub>               |
| Tesicam               | Antiinflammatory   | 21925-88-2  |      | C <sub>16</sub> H <sub>11</sub> ClN <sub>2</sub> O <sub>3</sub>               |
| Tesimide              | Antiinflammatory   | 35423-09-7  |      | C <sub>16</sub> H <sub>15</sub> NO <sub>2</sub>                               |
| Tesmilifene           | Antihistaminic     | 98774-23-3  |      | C <sub>19</sub> H <sub>25</sub> NO                                            |
| Tesofensine           | Antiparkinsonian   | 195875-84-4 |      | C <sub>17</sub> H <sub>23</sub> Cl <sub>2</sub> NO                            |
| Testolactone          | Antineoplastic     | 968-93-4    |      | C <sub>19</sub> H <sub>24</sub> O <sub>3</sub>                                |
| Testosterone          | Androgen           | 58-22-0     |      | C <sub>19</sub> H <sub>28</sub> O <sub>2</sub>                                |
| Tetomilast            | Bronchodilator     | 145739-56-6 |      | C <sub>19</sub> H <sub>18</sub> N <sub>2</sub> O <sub>4</sub> S               |
| Tetrabarbital         | Sedative           | 76-23-3     |      | C <sub>12</sub> H <sub>20</sub> N <sub>2</sub> O <sub>3</sub>                 |
| Tetrabenzazine        | Antipsychotic      | 58-46-8     | Y    | C <sub>19</sub> H <sub>27</sub> NO <sub>3</sub>                               |
| Tetracaine            | Anesthetic         | 94-24-6     |      | C <sub>15</sub> H <sub>24</sub> N <sub>2</sub> O <sub>2</sub>                 |
| Tetrachloroethylene   | Anthelminthic      | 127-18-4    |      | C <sub>2</sub> Cl <sub>4</sub>                                                |
| Tetracycline          | Antibiotic         | 60-54-8     |      | C <sub>22</sub> H <sub>24</sub> N <sub>2</sub> O <sub>8</sub>                 |
| Tetradonium Bromide   | Antiarrhythmic     | 1119-97-7   |      | C <sub>17</sub> H <sub>38</sub> BrN                                           |
| Tetragestrin          | Antispasmodic      | 1947-37-1   |      | C <sub>29</sub> H <sub>36</sub> N <sub>6</sub> O <sub>6</sub> S               |
| Tetrahydrozoline      | Decongestant       | 84-22-0     |      | C <sub>13</sub> H <sub>16</sub> N <sub>2</sub>                                |
| Tetramisole           | Anthelminthic      | 5036-02-2   |      | C <sub>11</sub> H <sub>12</sub> N <sub>2</sub> S                              |
| Tetrantoin            | Anticonvulsant     | 52094-70-9  |      | C <sub>12</sub> H <sub>12</sub> N <sub>2</sub> O <sub>2</sub>                 |
| Tetraxetan            | Antidote           | 60239-18-1  |      | C <sub>16</sub> H <sub>28</sub> N <sub>4</sub> O <sub>8</sub>                 |
| Tetrazepam            | Muscle Relaxant    | 10379-14-3  |      | C <sub>16</sub> H <sub>17</sub> ClN <sub>2</sub> O                            |
| Tetrazolast Meglumine | Antihistaminic     | 95104-27-1  |      | C <sub>10</sub> H <sub>6</sub> N <sub>8</sub>                                 |
| Tetripofen            | Analgesic          | 28168-10-7  |      | C <sub>15</sub> H <sub>18</sub> O <sub>2</sub>                                |
| Tetronasin 5930       | Antibiotic         | 75139-06-9  |      | C <sub>35</sub> H <sub>54</sub> O <sub>8</sub>                                |
| Tetroquinone          | Dermatologic       | 319-89-1    |      | C <sub>6</sub> H <sub>4</sub> O <sub>6</sub>                                  |
| Tetroxoprim           | Antibacterial      | 53808-87-0  |      | C <sub>16</sub> H <sub>22</sub> N <sub>4</sub> O <sub>4</sub>                 |
| Tetrydamine           | Analgesic          | 17289-49-5  |      | C <sub>9</sub> H <sub>15</sub> N <sub>3</sub>                                 |
| Texacromil            | Antihistaminic     | 77005-28-8  |      | C <sub>14</sub> H <sub>14</sub> O <sub>6</sub> S                              |
| Tezacitabine          | Antineoplastic     | 130306-02-4 |      | C <sub>10</sub> H <sub>12</sub> FN <sub>3</sub> O <sub>4</sub>                |
| Tezosentan            | Anesthetic         | 180384-57-0 |      | C <sub>27</sub> H <sub>27</sub> N <sub>9</sub> O <sub>6</sub> S               |
| Thalidomide           | Immunomodulator    | 50-35-1     | Y    | C <sub>13</sub> H <sub>10</sub> N <sub>2</sub> O <sub>4</sub>                 |
| Thebacon              | Analgesic          | 466-90-0    |      | C <sub>20</sub> H <sub>23</sub> NO <sub>4</sub>                               |
| Thenalidine           | Antihistaminic     | 86-12-4     |      | C <sub>17</sub> H <sub>22</sub> N <sub>2</sub> S                              |
| Thenium Closylate     | Anthelminthic      | 4304-40-9   |      | C <sub>21</sub> H <sub>24</sub> ClNO <sub>4</sub> S <sub>2</sub>              |
| Thenylidamine         | Antihistaminic     | 91-79-2     |      | C <sub>14</sub> H <sub>19</sub> N <sub>3</sub> S                              |
| Theobromine           | Diuretic           | 83-67-0     |      | C <sub>7</sub> H <sub>8</sub> N <sub>4</sub> O <sub>2</sub>                   |
| Theodrenaline         | Bronchodilator     | 13460-98-5  |      | C <sub>17</sub> H <sub>21</sub> N <sub>5</sub> O <sub>5</sub>                 |
| Theofibrate           | Antihyperlipidemic | 54504-70-0  |      | C <sub>19</sub> H <sub>21</sub> ClN <sub>4</sub> O <sub>5</sub>               |
| Theophylline          | Bronchodilator     | 58-55-9     | Y    | C <sub>7</sub> H <sub>8</sub> N <sub>4</sub> O <sub>2</sub>                   |

Table S1. Cont.

| Common Name               | Indication         | CAS Number  | Oral | Molecular Formula                                                              |
|---------------------------|--------------------|-------------|------|--------------------------------------------------------------------------------|
| Thiabendazole             | Anthelmintic       | 148-79-8    |      | C <sub>10</sub> H <sub>7</sub> N <sub>3</sub> S                                |
| Thiacetarsamide           | Anthelmintic       | 531-72-6    |      | C <sub>11</sub> H <sub>12</sub> AsNO <sub>5</sub> S <sub>2</sub>               |
| Thialbarbital             | Anesthetic         | 467-36-7    |      | C <sub>13</sub> H <sub>16</sub> N <sub>2</sub> O <sub>2</sub> S                |
| Thiambutosine             | Antibiotic         | 500-89-0    |      | C <sub>19</sub> H <sub>25</sub> N <sub>3</sub> OS                              |
| Thiamiprine               | Antineoplastic     | 5581-52-2   |      | C <sub>9</sub> H <sub>8</sub> N <sub>8</sub> O <sub>2</sub> S                  |
| Thiamphenicol             | Antibiotic         | 15318-45-3  |      | C <sub>12</sub> H <sub>15</sub> Cl <sub>2</sub> NO <sub>5</sub> S              |
| Thiamylal                 | Anesthetic         | 77-27-0     |      | C <sub>12</sub> H <sub>18</sub> N <sub>2</sub> O <sub>2</sub> S                |
| Thiazesim                 | Antidepressant     | 5845-26-1   |      | C <sub>19</sub> H <sub>22</sub> N <sub>2</sub> OS                              |
| Thiazinamium Chloride     | Antihistaminic     | 4320-13-2   |      | C <sub>18</sub> H <sub>23</sub> ClN <sub>2</sub> S                             |
| Thiazinamium Metilsulfate | Antihistaminic     | 58-34-4     |      | C <sub>19</sub> H <sub>26</sub> N <sub>2</sub> O <sub>4</sub> S <sub>2</sub>   |
| Thiazolsulfone            | Antibiotic         | 473-30-3    |      | C <sub>9</sub> H <sub>9</sub> N <sub>3</sub> O <sub>2</sub> S <sub>2</sub>     |
| Thiethylperazine          | Antiemetic         | 1420-55-9   |      | C <sub>22</sub> H <sub>29</sub> N <sub>3</sub> S                               |
| Thiocarbanidin            | Antibiotic         | 92-97-7     |      | C <sub>22</sub> H <sub>23</sub> N <sub>3</sub> O <sub>2</sub> S                |
| Thiocarbarsone            | Antiamebic         | 120-02-5    |      | C <sub>11</sub> H <sub>13</sub> AsN <sub>2</sub> O <sub>5</sub> S <sub>2</sub> |
| Thiocolchicoside          | Muscle Relaxant    | 602-41-5    | Y    | C <sub>27</sub> H <sub>33</sub> NO <sub>10</sub> S                             |
| Thioctic Acid             | Hepatic Protectant | 1077-28-7   |      | C <sub>8</sub> H <sub>14</sub> O <sub>2</sub> S <sub>2</sub>                   |
| Thioctic Acid Amide       | Unclassified       | 940-69-2    |      | C <sub>8</sub> H <sub>15</sub> NOS <sub>2</sub>                                |
| Thiodiglycol              | Antineoplastic     | 111-48-8    |      | C <sub>4</sub> H <sub>10</sub> O <sub>2</sub> S                                |
| Thiofuradene              | Antibacterial      | 2240-21-3   |      | C <sub>8</sub> H <sub>8</sub> N <sub>4</sub> O <sub>3</sub> S                  |
| Thioguanine               | Antineoplastic     | 154-42-7    | Y    | C <sub>5</sub> H <sub>5</sub> N <sub>5</sub> S                                 |
| Thiohexamide              | Antidiabetic       | 3692-44-2   |      | C <sub>14</sub> H <sub>20</sub> N <sub>2</sub> O <sub>3</sub> S <sub>2</sub>   |
| Thioinosine               | Immunosuppressant  | 574-25-4    |      | C <sub>10</sub> H <sub>12</sub> N <sub>4</sub> O <sub>4</sub> S                |
| Thiopental                | Anesthetic         | 76-75-5     |      | C <sub>11</sub> H <sub>18</sub> N <sub>2</sub> O <sub>2</sub> S                |
| Thiopropazate             | Antipsychotic      | 84-06-0     |      | C <sub>23</sub> H <sub>28</sub> ClN <sub>3</sub> O <sub>2</sub> S              |
| Thiopropazine             | Antipsychotic      | 316-81-4    |      | C <sub>22</sub> H <sub>30</sub> N <sub>4</sub> O <sub>2</sub> S <sub>2</sub>   |
| Thioridazine              | Antipsychotic      | 50-52-2     | Y    | C <sub>21</sub> H <sub>26</sub> N <sub>2</sub> S <sub>2</sub>                  |
| Thiotepa                  | Antineoplastic     | 52-24-4     |      | C <sub>6</sub> H <sub>12</sub> N <sub>3</sub> PS                               |
| Thiotetrabarbital         | Sedative           | 467-38-9    |      | C <sub>12</sub> H <sub>20</sub> N <sub>2</sub> O <sub>2</sub> S                |
| Thiothixene               | Antipsychotic      | 3313-26-6   | Y    | C <sub>23</sub> H <sub>29</sub> N <sub>3</sub> O <sub>2</sub> S <sub>2</sub>   |
| Thiouracil                | Thyroid            | 141-90-2    |      | C <sub>4</sub> H <sub>4</sub> N <sub>2</sub> OS                                |
| Thiourea                  | Antineoplastic     | 62-56-6     |      | CH <sub>4</sub> N <sub>2</sub> S                                               |
| Thiphenamil               | Muscle Relaxant    | 82-99-5     |      | C <sub>20</sub> H <sub>25</sub> NOS                                            |
| Thipencillin Potassium    | Antibacterial      | 26552-51-2  |      | C <sub>16</sub> H <sub>17</sub> KN <sub>2</sub> O <sub>4</sub> S <sub>2</sub>  |
| Thonzylamine              | Antihistaminic     | 91-85-0     |      | C <sub>16</sub> H <sub>22</sub> N <sub>4</sub> O                               |
| Thozalinone               | Antidepressant     | 655-05-0    |      | C <sub>11</sub> H <sub>12</sub> N <sub>2</sub> O <sub>2</sub>                  |
| Thurfyl Nicotinate        | Antiinflammatory   | 70-19-9     |      | C <sub>11</sub> H <sub>13</sub> NO <sub>3</sub>                                |
| Thymocartin               | Immunomodulator    | 85466-18-8  |      | C <sub>21</sub> H <sub>40</sub> N <sub>8</sub> O <sub>7</sub>                  |
| Thymoctonan               | Antiviral          | 107489-37-2 |      | C <sub>43</sub> H <sub>67</sub> N <sub>9</sub> O <sub>13</sub>                 |
| Thymol                    | Antibacterial      | 89-83-8     |      | C <sub>10</sub> H <sub>14</sub> O                                              |
| Thymopentin               | Immunosuppressant  | 69558-55-0  |      | C <sub>30</sub> H <sub>49</sub> N <sub>9</sub> O <sub>9</sub>                  |
| Thymotriganin             | Immunomodulator    | 85465-82-3  |      | C <sub>16</sub> H <sub>31</sub> N <sub>7</sub> O <sub>6</sub>                  |
| Thyromedan                | Thyroid            | 15301-96-9  |      | C <sub>21</sub> H <sub>24</sub> I <sub>3</sub> NO <sub>4</sub>                 |
| Thyropropic Acid          | Antihyperlipidemic | 51-26-3     |      | C <sub>15</sub> H <sub>11</sub> I <sub>3</sub> O <sub>4</sub>                  |
| Thyroxine                 | Thyroid            | 51-48-9     |      | C <sub>15</sub> H <sub>11</sub> I <sub>4</sub> NO <sub>4</sub>                 |
| Tiacrilast                | Antihistaminic     | 78299-53-3  |      | C <sub>12</sub> H <sub>10</sub> N <sub>2</sub> O <sub>3</sub> S                |
| Tiadenol                  | Antihyperlipidemic | 6964-20-1   |      | C <sub>14</sub> H <sub>30</sub> O <sub>2</sub> S <sub>2</sub>                  |
| Tiafibrate                | Antihyperlipidemic | 55837-28-0  |      | C <sub>34</sub> H <sub>48</sub> Cl <sub>2</sub> O <sub>6</sub> S <sub>2</sub>  |
| Tiagabine                 | Anticonvulsant     | 115103-54-3 | Y    | C <sub>20</sub> H <sub>25</sub> NO <sub>2</sub> S <sub>2</sub>                 |
| Tiamenidine               | Antihypertensive   | 31428-61-2  |      | C <sub>8</sub> H <sub>10</sub> ClN <sub>3</sub> S                              |
| Tiametonium Iodide        | Cholinergic        | 10433-71-3  |      | C <sub>12</sub> H <sub>30</sub> I <sub>2</sub> N <sub>2</sub> S                |
| Tiamulin Fumarate         | Antibacterial      | 55297-95-5  |      | C <sub>28</sub> H <sub>47</sub> NO <sub>4</sub> S                              |
| Tianafac                  | Antiinflammatory   | 51527-19-6  |      | C <sub>11</sub> H <sub>9</sub> ClO <sub>2</sub> S                              |
| Tianeptine                | Antidepressant     | 72797-41-2  | Y    | C <sub>21</sub> H <sub>25</sub> ClN <sub>2</sub> O <sub>4</sub> S              |
| Tiapamil                  | Antiarrhythmic     | 57010-31-8  |      | C <sub>26</sub> H <sub>37</sub> NO <sub>8</sub> S <sub>2</sub>                 |
| Tiapirinol                | Antibacterial      | 14785-50-3  |      | C <sub>12</sub> H <sub>16</sub> N <sub>2</sub> O <sub>4</sub> S                |
| Tiapride                  | Antispasmodic      | 51012-32-9  | Y    | C <sub>15</sub> H <sub>24</sub> N <sub>2</sub> O <sub>4</sub> S                |
| Tiaprofenic Acid          | Antiinflammatory   | 33005-95-7  | Y    | C <sub>14</sub> H <sub>12</sub> O <sub>3</sub> S                               |
| Tiaprost                  | Prostaglandin      | 71116-82-0  |      | C <sub>20</sub> H <sub>28</sub> O <sub>6</sub> S                               |
| Tiamamide                 | Antiinflammatory   | 32527-55-2  |      | C <sub>15</sub> H <sub>18</sub> ClN <sub>3</sub> O <sub>3</sub> S              |
| Tiazofurin                | Antineoplastic     | 60084-10-8  |      | C <sub>9</sub> H <sub>12</sub> N <sub>2</sub> O <sub>5</sub> S                 |
| Tiazuril                  | Antibacterial      | 35319-70-1  |      | C <sub>17</sub> H <sub>14</sub> ClN <sub>3</sub> O <sub>2</sub> S              |
| Tibalosin                 | Antihypertensive   | 63996-84-9  |      | C <sub>21</sub> H <sub>27</sub> NOS                                            |
| Tibeglisene               | Unclassified       | 134993-74-1 |      | C <sub>18</sub> H <sub>15</sub> ClO <sub>4</sub> S                             |

Table S1. Cont.

| Common Name               | Indication                | CAS Number  | Oral | Molecular Formula                                                              |
|---------------------------|---------------------------|-------------|------|--------------------------------------------------------------------------------|
| Tibenelast Sodium         | Bronchodilator            | 97852-72-7  |      | C <sub>13</sub> H <sub>14</sub> O <sub>4</sub> S                               |
| Tibenzate                 | Unclassified              | 13402-51-2  |      | C <sub>14</sub> H <sub>12</sub> OS                                             |
| Tibezonium Iodide         | Antibacterial             | 54663-47-7  | Y    | C <sub>28</sub> H <sub>32</sub> IN <sub>3</sub> S <sub>2</sub>                 |
| Tibolone                  | Steroid                   | 5630-53-5   | Y    | C <sub>21</sub> H <sub>28</sub> O <sub>2</sub>                                 |
| Tibric Acid               | Antihyperlipidemic        | 7087-94-8   |      | C <sub>14</sub> H <sub>18</sub> ClNO <sub>4</sub> S                            |
| Ticabesone Propionate     | Glucocorticoid            | 73205-13-7  |      | C <sub>25</sub> H <sub>32</sub> F <sub>2</sub> O <sub>5</sub> S                |
| Ticalopride               | Antiemetic                | 202590-69-0 |      | C <sub>14</sub> H <sub>20</sub> CIN <sub>3</sub> O <sub>3</sub>                |
| Ticarbodine               | Anthelminthic             | 31932-09-9  |      | C <sub>15</sub> H <sub>19</sub> F <sub>3</sub> N <sub>2</sub> S                |
| Ticarcillin Cresyl Sodium | Antibacterial             | 59070-07-4  |      | C <sub>22</sub> H <sub>22</sub> N <sub>2</sub> O <sub>6</sub> S <sub>2</sub>   |
| Ticarcillin               | Antibacterial             | 34787-01-4  |      | C <sub>15</sub> H <sub>16</sub> N <sub>2</sub> O <sub>6</sub> S <sub>2</sub>   |
| Ticlatone                 | Antibacterial             | 70-10-0     |      | C <sub>7</sub> H <sub>4</sub> CINOS                                            |
| Ticlopidine               | Antithrombotic            | 55142-85-3  | Y    | C <sub>14</sub> H <sub>14</sub> CINS                                           |
| Ticolubant                | Dermatologic              | 154413-61-3 |      | C <sub>23</sub> H <sub>19</sub> Cl <sub>2</sub> NO <sub>5</sub> S              |
| Ticrynafen                | Diuretic                  | 40180-04-9  |      | C <sub>13</sub> H <sub>8</sub> Cl <sub>2</sub> O <sub>4</sub> S                |
| Tidembersat               | Antimigraine              | 175013-73-7 |      | C <sub>20</sub> H <sub>19</sub> F <sub>2</sub> NO <sub>4</sub>                 |
| Tidiacic                  | Unclassified              | 30097-06-4  |      | C <sub>5</sub> H <sub>7</sub> NO <sub>4</sub> S                                |
| Tiemonium Iodide          | Antispasmodic             | 144-12-7    |      | C <sub>18</sub> H <sub>24</sub> INO <sub>2</sub> S                             |
| Tienocarbine              | Antipsychotic             | 75458-65-0  |      | C <sub>15</sub> H <sub>16</sub> N <sub>2</sub> S                               |
| Tienopramine              | Antidepressant            | 37967-98-9  |      | C <sub>17</sub> H <sub>20</sub> N <sub>2</sub> S                               |
| Tienoxolol                | Diuretic                  | 90055-97-3  |      | C <sub>21</sub> H <sub>28</sub> N <sub>2</sub> O <sub>5</sub> S                |
| Tifacogin                 | Anticoagulant             | 148883-56-1 |      | C <sub>12</sub> H <sub>13</sub> NS                                             |
| Tifemoxone                | Antidepressant            | 39754-64-8  |      | C <sub>11</sub> H <sub>13</sub> NO <sub>2</sub> S                              |
| Tifenazoxide              | Antihypertensive          | 279215-43-9 |      | C <sub>9</sub> H <sub>10</sub> CIN <sub>3</sub> O <sub>2</sub> S <sub>2</sub>  |
| Tiflamizole               | Antiinflammatory          | 62894-89-7  |      | C <sub>17</sub> H <sub>10</sub> F <sub>6</sub> N <sub>2</sub> O <sub>2</sub> S |
| Tiflorex                  | Anorexic                  | 53993-67-2  |      | C <sub>12</sub> H <sub>16</sub> F <sub>3</sub> NS                              |
| Tifluadom                 | Analgesic                 | 83386-35-0  |      | C <sub>22</sub> H <sub>20</sub> FN <sub>3</sub> OS                             |
| Tiflucarbine              | Antidepressant            | 89875-86-5  |      | C <sub>16</sub> H <sub>17</sub> FN <sub>2</sub> S                              |
| Tiformin                  | Antidiabetic              | 4210-97-3   |      | C <sub>5</sub> H <sub>12</sub> N <sub>4</sub> O                                |
| Tifurac Sodium            | Analgesic                 | 97483-17-5  |      | C <sub>18</sub> H <sub>14</sub> O <sub>4</sub> S                               |
| Tigecycline               | Antibiotic                | 220620-09-7 |      | C <sub>29</sub> H <sub>39</sub> N <sub>5</sub> O <sub>8</sub>                  |
| Tigemonam Dicholine       | Antibacterial             | 102916-21-2 |      | C <sub>22</sub> H <sub>41</sub> N <sub>7</sub> O <sub>11</sub> S <sub>2</sub>  |
| Tigestol                  | Progestogen               | 896-71-9    |      | C <sub>20</sub> H <sub>28</sub> O                                              |
| Tigluidine                | Antispasmodic             | 495-83-0    |      | C <sub>13</sub> H <sub>21</sub> NO <sub>2</sub>                                |
| Tilarginine               | Antineoplastic            | 17035-90-4  |      | C <sub>7</sub> H <sub>16</sub> N <sub>4</sub> O <sub>2</sub>                   |
| Tilbroquinol              | Antibiotic                | 7175-09-9   |      | C <sub>10</sub> H <sub>8</sub> BrNO                                            |
| Tiletamine                | Anesthetic                | 14176-49-9  |      | C <sub>12</sub> H <sub>17</sub> NOS                                            |
| Tilidine                  | Analgesic                 | 51931-66-9  | Y    | C <sub>17</sub> H <sub>23</sub> NO <sub>2</sub>                                |
| Tiliquinol                | Antibiotic                | 5541-67-3   |      | C <sub>10</sub> H <sub>9</sub> NO                                              |
| Tilisolol                 | Antiarrhythmic            | 85136-71-6  | Y    | C <sub>17</sub> H <sub>24</sub> N <sub>2</sub> O <sub>3</sub>                  |
| Tilmacoxib                | Antirheumatic             | 180200-68-4 |      | C <sub>16</sub> H <sub>19</sub> FN <sub>2</sub> O <sub>3</sub> S               |
| Tilmicosin                | Antibacterial             | 108050-54-0 |      | C <sub>46</sub> H <sub>80</sub> N <sub>2</sub> O <sub>13</sub>                 |
| Tilnoprofen Arbamel       | Antiinflammatory          | 118635-52-2 |      | C <sub>20</sub> H <sub>22</sub> N <sub>2</sub> O <sub>4</sub>                  |
| Tilomisole                | Immunomodulator           | 58433-11-7  |      | C <sub>17</sub> H <sub>11</sub> CIN <sub>2</sub> O <sub>2</sub> S              |
| Tilorone                  | Antiviral                 | 27591-97-5  |      | C <sub>25</sub> H <sub>34</sub> N <sub>2</sub> O <sub>3</sub>                  |
| Tilozepine                | Analgesic                 | 42239-60-1  |      | C <sub>17</sub> H <sub>18</sub> CIN <sub>3</sub> S                             |
| Tilsuprost                | Prostaglandin             | 80225-28-1  |      | C <sub>20</sub> H <sub>33</sub> NO <sub>4</sub> S                              |
| Tiludronate               | Bone Resorption Inhibitor | 89987-06-4  |      | C <sub>7</sub> H <sub>9</sub> ClO <sub>6</sub> P <sub>2</sub> S                |
| Timcodar                  | Antineoplastic            | 179033-51-3 |      | C <sub>43</sub> H <sub>45</sub> CIN <sub>4</sub> O <sub>6</sub>                |
| Timefurone                | Antihyperlipidemic        | 76301-19-4  |      | C <sub>15</sub> H <sub>14</sub> O <sub>5</sub> S                               |
| Timegadin                 | Antiinflammatory          | 71079-19-1  |      | C <sub>20</sub> H <sub>23</sub> N <sub>5</sub> S                               |
| Timelotem                 | Antipsychotic             | 96306-34-2  |      | C <sub>17</sub> H <sub>18</sub> FN <sub>3</sub> S                              |
| Timepidium Bromide        | Mydriatic                 | 35035-05-3  |      | C <sub>17</sub> H <sub>22</sub> BrNOS <sub>2</sub>                             |
| Timiperone                | Antipsychotic             | 57648-21-2  |      | C <sub>22</sub> H <sub>24</sub> FN <sub>3</sub> OS                             |
| Timirdine                 | Antipsychotic             | 100417-09-2 |      | C <sub>9</sub> H <sub>10</sub> CIN <sub>3</sub> S                              |
| Timobesone Acetate        | Steroid                   | 79578-14-6  |      | C <sub>24</sub> H <sub>31</sub> FO <sub>5</sub> S                              |
| Timofibrate               | Antihyperlipidemic        | 64179-54-0  |      | C <sub>14</sub> H <sub>16</sub> ClNO <sub>4</sub> S                            |
| Timolol                   | Antihypertensive          | 26839-75-8  | Y    | C <sub>13</sub> H <sub>24</sub> N <sub>4</sub> O <sub>3</sub> S                |
| Timonacic                 | Hepatic Protectant        | 444-27-9    | Y    | C <sub>4</sub> H <sub>7</sub> NO <sub>2</sub> S                                |
| Timoprazole               | Antilucerative            | 57237-97-5  |      | C <sub>13</sub> H <sub>11</sub> N <sub>3</sub> OS                              |
| Tinabitol                 | Antihypertensive          | 50708-95-7  |      | C <sub>23</sub> H <sub>34</sub> O <sub>2</sub> S                               |
| Tinazoline                | Antihypertensive          | 62882-99-9  |      | C <sub>11</sub> H <sub>11</sub> N <sub>3</sub> S                               |
| Tinidazole                | Antiprotozoal             | 19387-91-8  | Y    | C <sub>8</sub> H <sub>13</sub> N <sub>3</sub> O <sub>4</sub> S                 |
| Tinisulpride              | Gastroprokinetic          | 69387-87-7  |      | C <sub>20</sub> H <sub>29</sub> N <sub>3</sub> O <sub>4</sub> S                |

Table S1. Cont.

| Common Name         | Indication           | CAS Number  | Oral | Molecular Formula                                                              |
|---------------------|----------------------|-------------|------|--------------------------------------------------------------------------------|
| Tinofedrine         | Vasodilator          | 36702-83-7  |      | C <sub>20</sub> H <sub>21</sub> NOS <sub>2</sub>                               |
| Tinoridine          | Analgesic            | 24237-54-5  |      | C <sub>17</sub> H <sub>20</sub> N <sub>2</sub> O <sub>2</sub> S                |
| Tiocarlide          | Antibacterial        | 910-86-1    |      | C <sub>23</sub> H <sub>32</sub> N <sub>2</sub> O <sub>2</sub> S                |
| Tiocloमारol         | Anticoagulant        | 22619-35-8  |      | C <sub>22</sub> H <sub>16</sub> Cl <sub>2</sub> O <sub>4</sub> S               |
| Tioconazole         | Antifungal           | 65899-73-2  |      | C <sub>16</sub> H <sub>13</sub> Cl <sub>3</sub> N <sub>2</sub> OS              |
| Tioctilate          | Hepatic Protectant   | 10489-23-3  |      | C <sub>15</sub> H <sub>22</sub> OS                                             |
| Tiodazosin          | Antihypertensive     | 66969-81-1  |      | C <sub>18</sub> H <sub>21</sub> N <sub>7</sub> O <sub>4</sub> S                |
| Tiodonium Chloride  | Antibacterial        | 38070-41-6  |      | C <sub>10</sub> H <sub>7</sub> Cl <sub>2</sub> IS                              |
| Tiomergine          | Antipsychotic        | 57935-49-6  |      | C <sub>21</sub> H <sub>21</sub> N <sub>3</sub> S                               |
| Tiomesterone        | Androgen             | 2205-73-4   |      | C <sub>24</sub> H <sub>34</sub> O <sub>4</sub> S <sub>2</sub>                  |
| Tioperidone         | Antipsychotic        | 52618-67-4  |      | C <sub>25</sub> H <sub>32</sub> N <sub>4</sub> O <sub>2</sub> S                |
| Tiopinac            | Antiinflammatory     | 61220-69-7  |      | C <sub>16</sub> H <sub>12</sub> O <sub>3</sub> S                               |
| Tiopronin           | Antidote             | 1953-02-2   |      | C <sub>5</sub> H <sub>9</sub> NO <sub>3</sub> S                                |
| Tiopropamine        | Antihistaminic       | 39516-21-7  |      | C <sub>24</sub> H <sub>27</sub> NS                                             |
| Tiospirone          | Antipsychotic        | 87691-91-6  |      | C <sub>24</sub> H <sub>32</sub> N <sub>4</sub> O <sub>2</sub> S                |
| Tiotidine           | Antihistaminic       | 69014-14-8  |      | C <sub>10</sub> H <sub>16</sub> N <sub>8</sub> S <sub>2</sub>                  |
| Tiotropium          | Bronchodilator       | 186691-13-4 |      | C <sub>19</sub> H <sub>22</sub> NO <sub>4</sub> S <sub>2</sub>                 |
| Tioxacin            | Antibiotic           | 34976-39-1  |      | C <sub>14</sub> H <sub>12</sub> N <sub>2</sub> O <sub>4</sub> S                |
| Tioxamast           | Antihistaminic       | 74531-88-7  |      | C <sub>14</sub> H <sub>14</sub> N <sub>2</sub> O <sub>4</sub> S                |
| Tioxaprofen         | Antiinflammatory     | 40198-53-6  |      | C <sub>18</sub> H <sub>13</sub> Cl <sub>2</sub> NO <sub>3</sub> S              |
| Tioxidazole         | Anthelminthic        | 61570-90-9  |      | C <sub>12</sub> H <sub>14</sub> N <sub>2</sub> O <sub>3</sub> S                |
| Tioxolone           | Dermatologic         | 4991-65-5   |      | C <sub>7</sub> H <sub>4</sub> O <sub>3</sub> S                                 |
| Tipentosin          | Antihypertensive     | 95588-08-2  |      | C <sub>21</sub> H <sub>25</sub> NO <sub>3</sub> S                              |
| Tipepidine          | Antitussive          | 5169-78-8   |      | C <sub>15</sub> H <sub>17</sub> NS <sub>2</sub>                                |
| Tipetropium Bromide | Antispasmodic        | 54376-91-9  |      | C <sub>25</sub> H <sub>32</sub> BrNSOS                                         |
| Tipifarnib          | Antineoplastic       | 192185-72-1 | Y    | C <sub>27</sub> H <sub>22</sub> Cl <sub>2</sub> N <sub>4</sub> O               |
| Tipindole           | Antidepressant       | 7489-66-9   |      | C <sub>16</sub> H <sub>20</sub> N <sub>2</sub> O <sub>2</sub> S                |
| Tiplasinin          | Anticoagulant        | 393105-53-8 |      | C <sub>24</sub> H <sub>16</sub> F <sub>3</sub> NO <sub>4</sub>                 |
| Tipranavir          | Antiviral            | 174484-41-4 | Y    | C <sub>31</sub> H <sub>33</sub> F <sub>3</sub> N <sub>2</sub> O <sub>5</sub> S |
| Tipredane           | Steroid              | 85197-77-9  |      | C <sub>22</sub> H <sub>31</sub> FO <sub>2</sub> S <sub>2</sub>                 |
| Tiprenolol          | Antihypertensive     | 26481-51-6  |      | C <sub>13</sub> H <sub>21</sub> NO <sub>2</sub> S                              |
| Tiprinast Meglumine | Antihistaminic       | 83153-39-3  |      | C <sub>12</sub> H <sub>14</sub> N <sub>2</sub> O <sub>3</sub> S                |
| Tipropidil          | Vasodilator          | 70895-45-3  |      | C <sub>20</sub> H <sub>35</sub> NO <sub>2</sub> S                              |
| Tiprostanide        | Prostaglandin        | 67040-53-3  |      | C <sub>33</sub> H <sub>45</sub> NO <sub>6</sub> S                              |
| Tiprotimod          | Immunomodulator      | 105523-37-3 |      | C <sub>10</sub> H <sub>13</sub> NO <sub>4</sub> S <sub>2</sub>                 |
| Tiqueside           | Antihyperlipidemic   | 99759-19-0  |      | C <sub>39</sub> H <sub>64</sub> O <sub>13</sub>                                |
| Tiquinamide         | Mydriatic            | 53400-67-2  |      | C <sub>11</sub> H <sub>14</sub> N <sub>2</sub> S                               |
| Tiquizium Bromide   | Antispasmodic        | 71731-58-3  |      | C <sub>19</sub> H <sub>24</sub> BrNS <sub>2</sub>                              |
| Tiracizine          | Antidepressant       | 83275-56-3  |      | C <sub>21</sub> H <sub>25</sub> N <sub>3</sub> O <sub>3</sub>                  |
| Tirapazamine        | Antineoplastic       | 27314-97-2  |      | C <sub>7</sub> H <sub>6</sub> N <sub>4</sub> O <sub>2</sub>                    |
| Tiratricol          | Thyroid              | 51-24-1     |      | C <sub>14</sub> H <sub>9</sub> I <sub>3</sub> O <sub>4</sub>                   |
| Tirilazad           | Capillary Protectant | 110101-66-1 |      | C <sub>38</sub> H <sub>52</sub> N <sub>6</sub> O <sub>2</sub>                  |
| Tirofiban           | Antithrombotic       | 144494-65-5 |      | C <sub>22</sub> H <sub>36</sub> N <sub>2</sub> O <sub>5</sub> S                |
| Tiropamide          | Antispasmodic        | 55837-29-1  |      | C <sub>28</sub> H <sub>41</sub> N <sub>3</sub> O <sub>3</sub>                  |
| Tisocromide         | Antipsychotic        | 35423-51-9  |      | C <sub>19</sub> H <sub>30</sub> N <sub>2</sub> O <sub>6</sub> S                |
| Tisopurine          | Antineoplastic       | 5334-23-6   |      | C <sub>5</sub> H <sub>4</sub> N <sub>4</sub> S                                 |
| Tisoquone           | Antineoplastic       | 40692-37-3  |      | C <sub>17</sub> H <sub>17</sub> NS                                             |
| Tivanidazole        | Antiprotozoal        | 80680-05-3  |      | C <sub>11</sub> H <sub>13</sub> N <sub>5</sub> O <sub>2</sub> S                |
| Tiviciclovir        | Antiviral            | 103024-93-7 |      | C <sub>9</sub> H <sub>13</sub> N <sub>5</sub> O <sub>3</sub>                   |
| Tivirapine          | Antiviral            | 137332-54-8 |      | C <sub>16</sub> H <sub>20</sub> CIN <sub>3</sub> S                             |
| Tixadil             | Unclassified         | 2949-95-3   |      | C <sub>24</sub> H <sub>25</sub> NS                                             |
| Tixanox             | Antihistaminic       | 40691-50-7  |      | C <sub>15</sub> H <sub>10</sub> O <sub>5</sub> S                               |
| Tixocortol Pivalate | Antiinflammatory     | 55560-96-8  |      | C <sub>26</sub> H <sub>38</sub> O <sub>5</sub> S                               |
| Tizabrin            | Unclassified         | 83573-53-9  |      | C <sub>8</sub> H <sub>15</sub> NO <sub>3</sub> S                               |
| Tizanidine          | Antispasmodic        | 51322-75-9  | Y    | C <sub>9</sub> H <sub>8</sub> CIN <sub>5</sub> S                               |
| Tizolemide          | Diuretic             | 56488-58-5  |      | C <sub>11</sub> H <sub>14</sub> CIN <sub>3</sub> O <sub>3</sub> S <sub>2</sub> |
| Tizoprolol Acid     | Antihyperlipidemic   | 30709-69-4  |      | C <sub>7</sub> H <sub>9</sub> NO <sub>2</sub> S                                |
| Tnp-470             | Antineoplastic       | 129298-91-5 |      | C <sub>19</sub> H <sub>28</sub> CINO <sub>6</sub>                              |
| Tobicillin          | Antibiotic           | 151287-22-8 |      | C <sub>27</sub> H <sub>30</sub> N <sub>2</sub> O <sub>6</sub> S                |
| Toborinone          | Cardiotonic          | 143343-83-3 |      | C <sub>21</sub> H <sub>24</sub> N <sub>2</sub> O <sub>5</sub>                  |
| Tobramycin          | Antibiotic           | 32986-56-4  |      | C <sub>18</sub> H <sub>37</sub> N <sub>5</sub> O <sub>9</sub>                  |
| Tobuterol           | Bronchodilator       | 75626-99-2  |      | C <sub>28</sub> H <sub>31</sub> NO <sub>5</sub>                                |
| Tocainide           | Antiarrhythmic       | 41708-72-9  |      | C <sub>11</sub> H <sub>16</sub> N <sub>2</sub> O                               |

Table S1. Cont.

| Common Name            | Indication           | CAS Number  | Oral | Molecular Formula                                                               |
|------------------------|----------------------|-------------|------|---------------------------------------------------------------------------------|
| Tocamphyl              | Choleretic           | 465-27-0    |      | C <sub>19</sub> H <sub>26</sub> O <sub>4</sub>                                  |
| Tocladesine            | Antineoplastic       | 41941-56-4  |      | C <sub>10</sub> H <sub>11</sub> ClN <sub>5</sub> O <sub>6</sub> P               |
| Tocofenoxate           | Antidepressant       | 61343-44-0  |      | C <sub>37</sub> H <sub>55</sub> ClO <sub>4</sub>                                |
| Tocofibrate            | Antihyperlipidemic   | 50465-39-9  |      | C <sub>39</sub> H <sub>59</sub> ClO <sub>4</sub>                                |
| Todralazine            | Antihypertensive     | 14679-73-3  |      | C <sub>11</sub> H <sub>12</sub> N <sub>4</sub> O <sub>2</sub>                   |
| Tofenacin              | Antidepressant       | 15301-93-6  |      | C <sub>17</sub> H <sub>21</sub> NO                                              |
| Tofetridine            | Analgesic            | 40173-75-9  |      | C <sub>15</sub> H <sub>21</sub> NO                                              |
| Tofimilast             | Bronchodilator       | 185954-27-2 |      | C <sub>18</sub> H <sub>21</sub> N <sub>5</sub> S                                |
| Tofisoline             | Unclassified         | 29726-99-6  |      | C <sub>22</sub> H <sub>26</sub> N <sub>2</sub> O <sub>4</sub>                   |
| Tofisopam              | Anxiolytic           | 22345-47-7  |      | C <sub>22</sub> H <sub>26</sub> N <sub>2</sub> O <sub>4</sub>                   |
| Tolafentrine           | Erectile Dysfunction | 139308-65-9 |      | C <sub>28</sub> H <sub>31</sub> N <sub>3</sub> O <sub>4</sub> S                 |
| Tolamolol              | Vasodilator          | 38103-61-6  |      | C <sub>19</sub> H <sub>24</sub> N <sub>2</sub> O <sub>4</sub>                   |
| Tolazamide             | Antidiabetic         | 1156-19-0   |      | C <sub>14</sub> H <sub>21</sub> N <sub>3</sub> O <sub>3</sub> S                 |
| Tolazoline             | Vasodilator          | 59-98-3     |      | C <sub>10</sub> H <sub>12</sub> N <sub>2</sub>                                  |
| Tolboxane              | Antianginal          | 2430-46-8   |      | C <sub>14</sub> H <sub>21</sub> BO <sub>2</sub>                                 |
| Tolbutamide            | Antidiabetic         | 64-77-7     |      | C <sub>12</sub> H <sub>18</sub> N <sub>2</sub> O <sub>3</sub> S                 |
| Tolcapone              | Antiparkinsonian     | 134308-13-7 | Y    | C <sub>14</sub> H <sub>11</sub> NO <sub>5</sub>                                 |
| Tolciclate             | Antifungal           | 50838-36-3  |      | C <sub>20</sub> H <sub>21</sub> NOS                                             |
| Toldimfos              | Antineoplastic       | 57808-64-7  |      | C <sub>9</sub> H <sub>14</sub> NO <sub>2</sub> P                                |
| Tolfamide              | Antibiotic           | 70788-29-3  |      | C <sub>8</sub> H <sub>12</sub> N <sub>3</sub> O <sub>2</sub> P                  |
| Tolfenamic Acid        | Antiinflammatory     | 13710-19-5  |      | C <sub>14</sub> H <sub>12</sub> ClNO <sub>2</sub>                               |
| Tolgabide              | Anticonvulsant       | 86914-11-6  |      | C <sub>18</sub> H <sub>18</sub> Cl <sub>2</sub> N <sub>2</sub> O <sub>2</sub>   |
| Tolimidone             | Antiulcerative       | 41964-07-2  |      | C <sub>11</sub> H <sub>10</sub> N <sub>2</sub> O <sub>2</sub>                   |
| Tolindate              | Antifungal           | 27877-51-6  |      | C <sub>18</sub> H <sub>19</sub> NOS                                             |
| Toliodium Chloride     | Antibacterial        | 19028-28-5  |      | C <sub>14</sub> H <sub>14</sub> ClI                                             |
| Toliprolol             | Antianginal          | 2933-94-0   |      | C <sub>13</sub> H <sub>21</sub> NO <sub>2</sub>                                 |
| Tolmesoxide            | Antihypertensive     | 38452-29-8  |      | C <sub>10</sub> H <sub>14</sub> O <sub>3</sub> S                                |
| Tolmetin               | Antiinflammatory     | 26171-23-3  |      | C <sub>15</sub> H <sub>15</sub> NO <sub>3</sub>                                 |
| Tolnaftate             | Antifungal           | 2398-96-1   |      | C <sub>19</sub> H <sub>17</sub> NOS                                             |
| Tolnapersine           | Antihypertensive     | 70312-00-4  |      | C <sub>21</sub> H <sub>26</sub> N <sub>2</sub> O                                |
| Tolnidamine            | Antihistaminic       | 50454-68-7  |      | C <sub>16</sub> H <sub>13</sub> ClN <sub>2</sub> O <sub>2</sub>                 |
| Tolconium Metilsulfate | Antifungal           | 552-92-1    |      | C <sub>23</sub> H <sub>43</sub> NO <sub>4</sub> S                               |
| Tolonidine             | Antihypertensive     | 4201-22-3   |      | C <sub>10</sub> H <sub>12</sub> ClN <sub>3</sub>                                |
| Toloxatone             | Antidepressant       | 29218-27-7  |      | C <sub>11</sub> H <sub>13</sub> NO <sub>3</sub>                                 |
| Tolpadol               | Analgesic            | 77502-27-3  |      | C <sub>28</sub> H <sub>26</sub> N <sub>4</sub> O <sub>2</sub>                   |
| Tolpentamide           | Antispasmodic        | 1027-87-8   |      | C <sub>13</sub> H <sub>18</sub> N <sub>2</sub> O <sub>3</sub> S                 |
| Tolperisone            | Muscle Relaxant      | 728-88-1    | Y    | C <sub>16</sub> H <sub>23</sub> NO                                              |
| Tolpiprazole           | Antipsychotic        | 20326-13-0  |      | C <sub>17</sub> H <sub>24</sub> N <sub>4</sub>                                  |
| Tolpronine             | Analgesic            | 97-57-4     |      | C <sub>15</sub> H <sub>21</sub> NO <sub>2</sub>                                 |
| Tolpropamine           | Antihistaminic       | 5632-44-0   |      | C <sub>18</sub> H <sub>23</sub> N                                               |
| Tolpyrramide           | Antidiabetic         | 5588-38-5   |      | C <sub>12</sub> H <sub>16</sub> N <sub>2</sub> O <sub>3</sub> S                 |
| Tolquinzole            | Unclassified         | 6187-50-4   |      | C <sub>16</sub> H <sub>23</sub> NO                                              |
| Tolrestat              | Antidiabetic         | 82964-04-3  |      | C <sub>16</sub> H <sub>14</sub> F <sub>3</sub> NO <sub>3</sub> S                |
| Tolterodine            | Misc- Urologic       | 124937-51-5 | Y    | C <sub>22</sub> H <sub>31</sub> NO                                              |
| Toltrazuril            | Antibacterial        | 69004-03-1  |      | C <sub>18</sub> H <sub>14</sub> F <sub>3</sub> N <sub>3</sub> O <sub>4</sub> S  |
| Tolufazepam            | Anxiolytic           | 86273-92-9  |      | C <sub>24</sub> H <sub>20</sub> Cl <sub>2</sub> N <sub>2</sub> O <sub>3</sub> S |
| Tolvaptan              | Cardiotonic          | 150683-30-0 | Y    | C <sub>26</sub> H <sub>25</sub> ClN <sub>2</sub> O <sub>3</sub>                 |
| Tolycaine              | Anesthetic           | 3686-58-6   |      | C <sub>15</sub> H <sub>22</sub> N <sub>2</sub> O <sub>3</sub>                   |
| Tomeglovir             | Antiviral            | 233254-24-5 |      | C <sub>23</sub> H <sub>27</sub> N <sub>3</sub> O <sub>4</sub> S                 |
| Tomelukast             | Bronchodilator       | 88107-10-2  |      | C <sub>16</sub> H <sub>22</sub> N <sub>4</sub> O <sub>3</sub>                   |
| Tomoglumide            | Gastroprokinetic     | 97964-54-0  |      | C <sub>24</sub> H <sub>38</sub> N <sub>2</sub> O <sub>4</sub>                   |
| Tomoxiprole            | Antiinflammatory     | 76145-76-1  |      | C <sub>21</sub> H <sub>20</sub> N <sub>2</sub> O                                |
| Tonabersat             | Antimigraine         | 175013-84-0 |      | C <sub>20</sub> H <sub>19</sub> ClFNO <sub>4</sub>                              |
| Tonazocine Mesylate    | Analgesic            | 71461-18-2  |      | C <sub>23</sub> H <sub>35</sub> NO <sub>2</sub>                                 |
| Topicaïne              | Analgesic            | 76-91-5     |      | C <sub>26</sub> H <sub>37</sub> NO <sub>4</sub>                                 |
| Topilutamide           | Sedative             | 260980-89-0 |      | C <sub>13</sub> H <sub>11</sub> F <sub>6</sub> N <sub>3</sub> O <sub>5</sub>    |
| Topiramate             | Anticonvulsant       | 97240-79-4  | Y    | C <sub>12</sub> H <sub>21</sub> NO <sub>8</sub> S                               |
| Topixantrone           | Antineoplastic       | 156090-18-5 |      | C <sub>21</sub> H <sub>26</sub> N <sub>6</sub> O <sub>2</sub>                   |
| Topotecan              | Antineoplastic       | 123948-87-8 | Y    | C <sub>23</sub> H <sub>23</sub> N <sub>3</sub> O <sub>5</sub>                   |
| Toprilidone            | Analgesic            | 54063-58-0  |      | C <sub>19</sub> H <sub>25</sub> N <sub>3</sub> O                                |
| Topterone              | Steroid              | 60607-35-4  |      | C <sub>22</sub> H <sub>34</sub> O <sub>2</sub>                                  |
| Toquizine              | Mydriatic            | 7125-71-5   |      | C <sub>23</sub> H <sub>29</sub> N <sub>5</sub> O                                |
| Torbafylline           | Bronchodilator       | 105102-21-4 |      | C <sub>16</sub> H <sub>26</sub> N <sub>4</sub> O <sub>4</sub>                   |

Table S1. Cont.

| Common Name              | Indication         | CAS Number  | Oral | Molecular Formula                                                             |
|--------------------------|--------------------|-------------|------|-------------------------------------------------------------------------------|
| Torcetrapib              | Antihyperlipidemic | 262352-17-0 |      | C <sub>26</sub> H <sub>25</sub> F <sub>9</sub> N <sub>2</sub> O <sub>4</sub>  |
| Torcitabine              | Antiviral          | 40093-94-5  |      | C <sub>9</sub> H <sub>13</sub> N <sub>3</sub> O <sub>4</sub>                  |
| Toremifene               | Antineoplastic     | 89778-26-7  | Y    | C <sub>26</sub> H <sub>28</sub> ClNO                                          |
| Toripristone             | Progestogen        | 91935-26-1  |      | C <sub>31</sub> H <sub>39</sub> NO <sub>2</sub>                               |
| Torsemide                | Diuretic           | 56211-40-6  |      | C <sub>16</sub> H <sub>20</sub> N <sub>4</sub> O <sub>5</sub> S               |
| Tosagestin               | Contraceptive      | 110072-15-6 |      | C <sub>21</sub> H <sub>24</sub> O <sub>2</sub>                                |
| Tosifen                  | Antianginal        | 32295-18-4  |      | C <sub>17</sub> H <sub>20</sub> N <sub>2</sub> O <sub>3</sub> S               |
| Tosufloxacin             | Antibiotic         | 100490-36-6 | Y    | C <sub>19</sub> H <sub>15</sub> F <sub>3</sub> N <sub>4</sub> O <sub>3</sub>  |
| Tosulur                  | Unclassified       | 87051-13-6  |      | C <sub>11</sub> H <sub>15</sub> NO <sub>5</sub> S                             |
| Trabectedin              | Antineoplastic     | 114899-77-3 |      | C <sub>39</sub> H <sub>43</sub> N <sub>3</sub> O <sub>11</sub> S              |
| Traboxopine              | Antipsychotic      | 103624-59-5 |      | C <sub>19</sub> H <sub>23</sub> ClN <sub>2</sub> O <sub>2</sub>               |
| Tracazolate              | Sedative           | 41094-88-6  |      | C <sub>16</sub> H <sub>24</sub> N <sub>4</sub> O <sub>2</sub>                 |
| Tradecamide              | Unclassified       | 132787-19-0 |      | C <sub>15</sub> H <sub>31</sub> NO <sub>2</sub>                               |
| Tralonide                | Glucocorticoid     | 21365-49-1  |      | C <sub>24</sub> H <sub>28</sub> Cl <sub>2</sub> F <sub>2</sub> O <sub>4</sub> |
| Tramadol                 | Analgesic          | 27203-92-5  | Y    | C <sub>16</sub> H <sub>25</sub> NO <sub>2</sub>                               |
| Tramazoline              | Decongestant       | 1082-57-1   |      | C <sub>13</sub> H <sub>17</sub> N <sub>3</sub>                                |
| Tramiprosate             | Nootropic          | 3687-18-1   |      | C <sub>3</sub> H <sub>9</sub> NO <sub>3</sub> S                               |
| Trandolapril             | Antihypertensive   | 87679-37-6  |      | C <sub>24</sub> H <sub>34</sub> N <sub>2</sub> O <sub>5</sub>                 |
| Trandolaprilat           | Antihypertensive   | 87679-71-8  |      | C <sub>22</sub> H <sub>30</sub> N <sub>2</sub> O <sub>5</sub>                 |
| Tranexamic Acid          | Hemostatic         | 1197-18-8   |      | C <sub>8</sub> H <sub>15</sub> NO <sub>2</sub>                                |
| Tranilast                | Antihistaminic     | 53902-12-8  |      | C <sub>18</sub> H <sub>17</sub> NO <sub>5</sub>                               |
| Transcainide             | Antiarrhythmic     | 88296-62-2  |      | C <sub>22</sub> H <sub>35</sub> N <sub>3</sub> O <sub>2</sub>                 |
| Trantelium Bromide       | Antispasmodic      | 4047-34-1   |      | C <sub>23</sub> H <sub>26</sub> NO <sub>3</sub> .Br                           |
| Tranylcypromine          | Antidepressant     | 155-09-9    |      | C <sub>9</sub> H <sub>11</sub> N                                              |
| Trapenacaine             | Anesthetic         | 104485-01-0 |      | C <sub>22</sub> H <sub>34</sub> N <sub>2</sub> O <sub>3</sub>                 |
| Trapidil                 | Vasodilator        | 15421-84-8  |      | C <sub>10</sub> H <sub>15</sub> N <sub>5</sub>                                |
| Travoprost               | Antiglaucoma       | 157283-68-6 |      | C <sub>26</sub> H <sub>35</sub> F <sub>3</sub> O <sub>6</sub>                 |
| Traxanox                 | Antihistaminic     | 58712-69-9  |      | C <sub>13</sub> H <sub>6</sub> ClN <sub>5</sub> O <sub>2</sub>                |
| Traxoprodil Mesylate     | Nootropic          | 134234-12-1 |      | C <sub>20</sub> H <sub>25</sub> NO <sub>3</sub>                               |
| Trazitiline              | Antidepressant     | 26070-23-5  |      | C <sub>21</sub> H <sub>24</sub> N <sub>2</sub>                                |
| Trazium Esilate          | Antidepressant     | 97110-59-3  |      | C <sub>19</sub> H <sub>18</sub> ClN <sub>3</sub> O <sub>4</sub> S             |
| Trazodone                | Antidepressant     | 19794-93-5  | Y    | C <sub>19</sub> H <sub>22</sub> ClN <sub>5</sub> O                            |
| Trazolopride             | Antiemetic         | 86365-92-6  |      | C <sub>20</sub> H <sub>23</sub> N <sub>5</sub> O <sub>2</sub>                 |
| Trebenzomine             | Antidepressant     | 23915-73-3  |      | C <sub>12</sub> H <sub>17</sub> NO                                            |
| Trecadrine               | Antidiabetic       | 108767-50-6 |      | C <sub>27</sub> H <sub>29</sub> NO                                            |
| Trecetilide              | Antiarrhythmic     | 180918-68-7 |      | C <sub>21</sub> H <sub>37</sub> FN <sub>2</sub> O <sub>3</sub> S              |
| Trefentanil              | Analgesic          | 120656-74-8 |      | C <sub>25</sub> H <sub>31</sub> FN <sub>6</sub> O <sub>2</sub>                |
| Trelnarizine             | Antihistaminic     | 123205-52-7 |      | C <sub>28</sub> H <sub>30</sub> F <sub>2</sub> N <sub>2</sub> O <sub>2</sub>  |
| Treloxinate              | Antihyperlipidemic | 30910-27-1  |      | C <sub>16</sub> H <sub>12</sub> Cl <sub>2</sub> O <sub>4</sub>                |
| Trenbolone Acetate       | Steroid            | 10161-34-9  |      | C <sub>20</sub> H <sub>24</sub> O <sub>3</sub>                                |
| Trengestone              | Progestogen        | 5192-84-7   |      | C <sub>21</sub> H <sub>25</sub> ClO <sub>2</sub>                              |
| Trenizine                | Antihistaminic     | 89224-07-7  |      | C <sub>31</sub> H <sub>40</sub> N <sub>2</sub> O                              |
| Treosulfan               | Antineoplastic     | 299-75-2    | Y    | C <sub>6</sub> H <sub>14</sub> O <sub>8</sub> S <sub>2</sub>                  |
| Trepibutone              | Choleretic         | 41826-92-0  |      | C <sub>16</sub> H <sub>22</sub> O <sub>6</sub>                                |
| Trepipam Maleate         | Sedative           | 56030-50-3  |      | C <sub>19</sub> H <sub>23</sub> NO <sub>2</sub>                               |
| Trepirium Iodide         | Antihypertensive   | 1018-34-4   |      | C <sub>12</sub> H <sub>26</sub> I <sub>2</sub> N <sub>2</sub> O <sub>2</sub>  |
| Treprostinil             | Antihypertensive   | 81846-19-7  | Y    | C <sub>23</sub> H <sub>34</sub> O <sub>5</sub>                                |
| Treptilamine             | Antispasmodic      | 58313-74-9  |      | C <sub>20</sub> H <sub>27</sub> NO                                            |
| Trequinsin               | Antihypertensive   | 79855-88-2  |      | C <sub>24</sub> H <sub>27</sub> N <sub>3</sub> O <sub>3</sub>                 |
| Tresperimus              | Immunosuppressant  | 160677-67-8 |      | C <sub>17</sub> H <sub>37</sub> N <sub>7</sub> O <sub>3</sub>                 |
| Trestolone Acetate       | Androgen           | 6157-87-5   |      | C <sub>21</sub> H <sub>30</sub> O <sub>3</sub>                                |
| Tretazicar               | Antineoplastic     | 21919-05-1  |      | C <sub>9</sub> H <sub>8</sub> N <sub>4</sub> O <sub>5</sub>                   |
| Trethinium Tosilate      | Unclassified       | 1748-43-2   |      | C <sub>19</sub> H <sub>25</sub> NO <sub>3</sub> S                             |
| Tretinoin                | Antineoplastic     | 302-79-4    | Y    | C <sub>20</sub> H <sub>28</sub> O <sub>2</sub>                                |
| Tretinoin Tocoferil      | Dermatologic       | 40516-48-1  |      | C <sub>49</sub> H <sub>76</sub> O <sub>3</sub>                                |
| Tretoquinol              | Bronchodilator     | 30418-38-3  |      | C <sub>19</sub> H <sub>23</sub> NO <sub>5</sub>                               |
| Triacetin                | Antifungal         | 102-76-1    |      | C <sub>9</sub> H <sub>14</sub> O <sub>6</sub>                                 |
| Triafungin               | Antifungal         | 55242-77-8  |      | C <sub>13</sub> H <sub>10</sub> N <sub>4</sub>                                |
| Triamcinolone            | Glucocorticoid     | 124-94-7    |      | C <sub>21</sub> H <sub>27</sub> FO <sub>6</sub>                               |
| Triamcinolone Acetonide  | Glucocorticoid     | 76-25-5     |      | C <sub>24</sub> H <sub>31</sub> FO <sub>6</sub>                               |
| Triamcinolone Benetonide | Glucocorticoid     | 31002-79-6  |      | C <sub>35</sub> H <sub>42</sub> FN <sub>8</sub> O <sub>8</sub>                |
| Triamcinolone Diacetate  | Glucocorticoid     | 67-78-7     |      | C <sub>25</sub> H <sub>31</sub> FO <sub>8</sub>                               |
| Triamcinolone Furetonide | Glucocorticoid     | 4989-94-0   |      | C <sub>33</sub> H <sub>35</sub> FO <sub>8</sub>                               |



Table S1. Cont.

| Common Name                                | Indication       | CAS Number | Oral | Molecular Formula                                                                                  |
|--------------------------------------------|------------------|------------|------|----------------------------------------------------------------------------------------------------|
| Triamcinolone Hexacetonide                 | Antiinflammatory | 5611-51-8  |      | C <sub>30</sub> H <sub>41</sub> FO <sub>7</sub>                                                    |
| Triampyzine Sulfate                        | Mydriatic        | 6503-95-3  |      | C <sub>9</sub> H <sub>15</sub> N <sub>3</sub>                                                      |
| Triamterene                                | Diuretic         | 396-01-0   |      | C <sub>12</sub> H <sub>11</sub> N <sub>7</sub>                                                     |
| Triaziquone                                | Antineoplastic   | 68-76-8    |      | C <sub>12</sub> H <sub>13</sub> N <sub>3</sub> O <sub>2</sub>                                      |
| Triazolam                                  | Sedative         | 28911-01-5 | Y    | C <sub>17</sub> H <sub>12</sub> Cl <sub>2</sub> N <sub>4</sub>                                     |
| Tribendilol                                | Antihypertensive | 96258-13-8 |      | C <sub>18</sub> H <sub>22</sub> N <sub>4</sub> O <sub>4</sub>                                      |
| Tribenoside                                | Dermatologic     | 10310-32-4 |      | C <sub>29</sub> H <sub>34</sub> O <sub>6</sub>                                                     |
| Tribromoethanol                            | Anesthetic       | 75-80-9    |      | C <sub>2</sub> H <sub>3</sub> Br <sub>3</sub> O                                                    |
| Tribromsalan                               | Antibacterial    | 87-10-5    |      | C <sub>13</sub> H <sub>8</sub> Br <sub>3</sub> NO <sub>2</sub>                                     |
| Tribuzone                                  | Antiinflammatory | 13221-27-7 |      | C <sub>22</sub> H <sub>24</sub> N <sub>2</sub> O <sub>3</sub>                                      |
| Tricetamide                                | Sedative         | 363-20-2   |      | C <sub>16</sub> H <sub>24</sub> N <sub>2</sub> O <sub>5</sub>                                      |
| Trichlormethiazide                         | Diuretic         | 133-67-5   |      | C <sub>8</sub> H <sub>8</sub> Cl <sub>3</sub> N <sub>3</sub> O <sub>4</sub> S <sub>2</sub>         |
| Trichlormethine                            | Antineoplastic   | 555-77-1   |      | C <sub>6</sub> H <sub>12</sub> Cl <sub>3</sub> N                                                   |
| 2,2,2-Trichloroethanol                     | Sedative         | 115-20-8   |      | C <sub>2</sub> H <sub>3</sub> Cl <sub>3</sub> O                                                    |
| Trichloroethylene                          | Anesthetic       | 79-01-6    |      | C <sub>2</sub> HCl <sub>3</sub>                                                                    |
| Triciribine                                | Antineoplastic   | 35943-35-2 |      | C <sub>13</sub> H <sub>16</sub> N <sub>6</sub> O <sub>4</sub>                                      |
| Triclabendazole                            | Anthelmintic     | 68786-66-3 |      | C <sub>14</sub> H <sub>9</sub> Cl <sub>3</sub> N <sub>2</sub> O <sub>5</sub>                       |
| Triclacetamol                              | Analgesic        | 6340-87-0  |      | C <sub>8</sub> H <sub>6</sub> Cl <sub>3</sub> NO <sub>2</sub>                                      |
| Triclazate                                 | Anorexic         | 7009-76-9  |      | C <sub>20</sub> H <sub>23</sub> NO <sub>3</sub>                                                    |
| Triclodazol                                | Antiprotozoal    | 56-28-0    |      | C <sub>17</sub> H <sub>15</sub> Cl <sub>3</sub> N <sub>2</sub> O <sub>2</sub>                      |
| Triclofenol Piperazine                     | Anthelmintic     | 95-95-4    |      | C <sub>6</sub> H <sub>3</sub> Cl <sub>3</sub> O                                                    |
| Triclofos                                  | Sedative         | 306-52-5   |      | C <sub>2</sub> H <sub>4</sub> Cl <sub>3</sub> O <sub>4</sub> P                                     |
| Triclofylline                              | Bronchodilator   | 17243-70-8 |      | C <sub>11</sub> H <sub>13</sub> Cl <sub>3</sub> N <sub>4</sub> O <sub>4</sub>                      |
| Triclonide                                 | Antiinflammatory | 26849-57-0 |      | C <sub>24</sub> H <sub>28</sub> Cl <sub>3</sub> FO <sub>4</sub>                                    |
| Tricyclamol Chloride                       | Antiparkinsonian | 3818-88-0  |      | C <sub>20</sub> H <sub>32</sub> ClNO                                                               |
| Tridihexethyl                              | Antispasmodic    | 60-49-1    |      | C <sub>21</sub> H <sub>36</sub> NO+                                                                |
| Tridihexethyl Iodide                       | Mydriatic        | 125-99-5   |      | C <sub>21</sub> H <sub>36</sub> INO                                                                |
| Tridolgosir                                | Antineoplastic   | 72741-87-8 |      | C <sub>8</sub> H <sub>15</sub> NO <sub>3</sub>                                                     |
| Trientine                                  | Antidote         | 112-24-3   |      | C <sub>6</sub> H <sub>18</sub> N <sub>4</sub>                                                      |
| Triethylamine                              | Antiinflammatory | 121-44-8   |      | C <sub>6</sub> H <sub>15</sub> N                                                                   |
| Triethylene Glycol                         | Antineoplastic   | 112-27-6   |      | C <sub>6</sub> H <sub>14</sub> O <sub>4</sub>                                                      |
| Triethylene Glycol Diacetate               | Antineoplastic   | 111-21-7   |      | C <sub>10</sub> H <sub>18</sub> O <sub>6</sub>                                                     |
| Triethylenemelamine                        | Antineoplastic   | 51-18-3    |      | C <sub>9</sub> H <sub>12</sub> N <sub>6</sub>                                                      |
| Trifenagrel                                | Antithrombotic   | 84203-09-8 |      | C <sub>25</sub> H <sub>25</sub> N <sub>3</sub> O                                                   |
| Trifezolac                                 | Antiinflammatory | 32710-91-1 |      | C <sub>23</sub> H <sub>18</sub> N <sub>2</sub> O <sub>2</sub>                                      |
| Triflocin                                  | Diuretic         | 13422-16-7 |      | C <sub>13</sub> H <sub>9</sub> F <sub>3</sub> N <sub>2</sub> O <sub>2</sub>                        |
| Triflubazam                                | Anxiolytic       | 22365-40-8 |      | C <sub>17</sub> H <sub>13</sub> F <sub>3</sub> N <sub>2</sub> O <sub>2</sub>                       |
| Triflumidate                               | Antiinflammatory | 24243-89-8 |      | C <sub>17</sub> H <sub>14</sub> F <sub>3</sub> NO <sub>5</sub> S                                   |
| Trifluomeprazine                           | Analgesic        | 2622-37-9  |      | C <sub>19</sub> H <sub>21</sub> F <sub>3</sub> N <sub>2</sub> S                                    |
| Trifluoperazine                            | Antipsychotic    | 117-89-5   |      | C <sub>21</sub> H <sub>24</sub> F <sub>3</sub> N <sub>3</sub> S                                    |
| Trifluoperidol                             | Antipsychotic    | 749-13-3   |      | C <sub>22</sub> H <sub>23</sub> F <sub>4</sub> NO <sub>2</sub>                                     |
| Triflupromazine                            | Antipsychotic    | 146-54-3   |      | C <sub>18</sub> H <sub>19</sub> F <sub>3</sub> N <sub>2</sub> S                                    |
| Trifluridine                               | Antiviral        | 70-00-8    |      | C <sub>10</sub> H <sub>11</sub> F <sub>3</sub> N <sub>2</sub> O <sub>5</sub>                       |
| Triflusal                                  | Antithrombotic   | 322-79-2   |      | C <sub>10</sub> H <sub>7</sub> F <sub>3</sub> O <sub>4</sub>                                       |
| Trigevolol                                 | Antihypertensive | 76812-98-1 |      | C <sub>21</sub> H <sub>28</sub> N <sub>2</sub> O <sub>7</sub>                                      |
| Trihexyphenidyl                            | Antiparkinsonian | 144-11-6   |      | C <sub>20</sub> H <sub>31</sub> NO                                                                 |
| Triletide                                  | Anticoagulant    | 62087-96-1 |      | C <sub>27</sub> H <sub>31</sub> N <sub>5</sub> O <sub>5</sub>                                      |
| Trilostane                                 | Pituitary        | 13647-35-3 |      | C <sub>20</sub> H <sub>27</sub> NO <sub>3</sub>                                                    |
| Trimazosin                                 | Antihypertensive | 35795-16-5 |      | C <sub>20</sub> H <sub>29</sub> N <sub>5</sub> O <sub>6</sub>                                      |
| Trimebutine                                | Antispasmodic    | 39133-31-8 |      | C <sub>22</sub> H <sub>29</sub> NO <sub>5</sub>                                                    |
| Trimecaine                                 | Anesthetic       | 616-68-2   |      | C <sub>15</sub> H <sub>24</sub> N <sub>2</sub> O                                                   |
| Trimedoxime Bromide                        | Antidote         | 56-97-3    |      | C <sub>15</sub> H <sub>18</sub> Br <sub>2</sub> N <sub>4</sub> O <sub>2</sub>                      |
| Trimegestone                               | Progestogen      | 74513-62-5 |      | C <sub>22</sub> H <sub>30</sub> O <sub>3</sub>                                                     |
| Trimeperidine                              | Analgesic        | 64-39-1    |      | C <sub>17</sub> H <sub>25</sub> NO <sub>2</sub>                                                    |
| Trimetazidine                              | Antianginal      | 5011-34-7  |      | C <sub>14</sub> H <sub>22</sub> N <sub>2</sub> O <sub>3</sub>                                      |
| Trimethadione                              | Anticonvulsant   | 127-48-0   |      | C <sub>6</sub> H <sub>9</sub> NO <sub>3</sub>                                                      |
| Trimethamide                               | Nootropic        | 5789-72-0  |      | C <sub>17</sub> H <sub>21</sub> N <sub>3</sub> O <sub>4</sub>                                      |
| Trimethaphan Camsylate                     | Antihypertensive | 68-91-7    |      | C <sub>22</sub> H <sub>25</sub> N <sub>2</sub> OS.C <sub>10</sub> H <sub>15</sub> O <sub>4</sub> S |
| Trimethidinium Methosulfate                | Antihypertensive | 14149-43-0 |      | C <sub>19</sub> H <sub>42</sub> N <sub>2</sub> O <sub>8</sub> S <sub>2</sub>                       |
| Trimethobenzamide                          | Antiemetic       | 138-56-7   |      | C <sub>21</sub> H <sub>28</sub> N <sub>2</sub> O <sub>5</sub>                                      |
| Trimethoprim                               | Antibacterial    | 738-70-5   | Y    | C <sub>14</sub> H <sub>18</sub> N <sub>4</sub> O <sub>3</sub>                                      |
| Trimethylcetylammmonium Pentachlorophenate | Antibacterial    | 87-76-3    |      | C <sub>19</sub> H <sub>42</sub> N.C <sub>6</sub> Cl <sub>5</sub> O                                 |

Table S1. Cont.

| Common Name              | Indication                   | CAS Number  | Oral | Molecular Formula                                                               |
|--------------------------|------------------------------|-------------|------|---------------------------------------------------------------------------------|
| Trimetozine              | Anxiolytic                   | 635-41-6    |      | C <sub>14</sub> H <sub>19</sub> NO <sub>5</sub>                                 |
| Trimetrexate             | Antineoplastic               | 52128-35-5  |      | C <sub>19</sub> H <sub>23</sub> N <sub>5</sub> O <sub>3</sub>                   |
| Trimetrexate Glucuronate | Antineoplastic               | 6556-12-3   |      | C <sub>6</sub> H <sub>10</sub> O <sub>7</sub>                                   |
| Trimexiline              | Unclassified                 | 64015-58-3  |      | C <sub>17</sub> H <sub>29</sub> N                                               |
| Trimipramine             | Antidepressant               | 739-71-9    |      | C <sub>20</sub> H <sub>26</sub> N <sub>2</sub>                                  |
| Trimoprostil             | Antilucerative               | 69900-72-7  |      | C <sub>23</sub> H <sub>38</sub> O <sub>4</sub>                                  |
| Trimoxamine              | Antihypertensive             | 15686-23-4  |      | C <sub>15</sub> H <sub>23</sub> NO <sub>3</sub>                                 |
| Trioxifene Mesylate      | Estrogen                     | 68307-81-3  |      | C <sub>30</sub> H <sub>31</sub> NO <sub>3</sub>                                 |
| Trioxsalen               | Dermatologic                 | 3902-71-4   |      | C <sub>14</sub> H <sub>12</sub> O <sub>3</sub>                                  |
| Tripamide                | Diuretic                     | 73803-48-2  |      | C <sub>16</sub> H <sub>20</sub> ClN <sub>3</sub> O <sub>3</sub> S               |
| Triparanol               | Antihyperlipidemic           | 78-41-1     |      | C <sub>27</sub> H <sub>32</sub> ClNO <sub>2</sub>                               |
| Tripelennamine           | Antihistaminic               | 91-81-6     |      | C <sub>16</sub> H <sub>21</sub> N <sub>3</sub>                                  |
| Tripolidine              | Antihistaminic               | 486-12-4    |      | C <sub>19</sub> H <sub>22</sub> N <sub>2</sub>                                  |
| Tritiozine               | Antilucerative               | 35619-65-9  |      | C <sub>14</sub> H <sub>19</sub> NO <sub>4</sub> S                               |
| Tritoqualine             | Antihistaminic               | 14504-73-5  |      | C <sub>26</sub> H <sub>32</sub> N <sub>2</sub> O <sub>8</sub>                   |
| Trixolane                | Unclassified                 | 47420-28-0  |      | C <sub>18</sub> H <sub>27</sub> NO <sub>6</sub>                                 |
| Trizoxime                | Antibiotic                   | 35710-57-7  |      | C <sub>16</sub> H <sub>15</sub> N <sub>5</sub> O <sub>2</sub>                   |
| Trocimine                | Antipsychotic                | 14368-24-2  |      | C <sub>17</sub> H <sub>25</sub> NO <sub>4</sub>                                 |
| Trodusquemine            | Antiobesity                  | 186139-09-3 |      | C <sub>37</sub> H <sub>72</sub> N <sub>4</sub> O <sub>5</sub> S                 |
| Trofosfamide             | Antineoplastic               | 22089-22-1  |      | C <sub>9</sub> H <sub>18</sub> Cl <sub>3</sub> N <sub>3</sub> O <sub>2</sub> P  |
| Troglitazone             | Antidiabetic                 | 97322-87-7  |      | C <sub>24</sub> H <sub>27</sub> NO <sub>5</sub> S                               |
| Trolamine                | Analgesic                    | 102-71-6    |      | C <sub>6</sub> H <sub>15</sub> NO <sub>3</sub>                                  |
| Troleandomycin           | Antibiotic                   | 2751-09-9   |      | C <sub>41</sub> H <sub>67</sub> NO <sub>15</sub>                                |
| Trolnitrate Phosphate    | Antianginal                  | 7077-34-1   |      | C <sub>6</sub> H <sub>12</sub> N <sub>4</sub> O <sub>9</sub>                    |
| Tromantadine             | Antiviral                    | 53783-83-8  |      | C <sub>16</sub> H <sub>28</sub> N <sub>2</sub> O <sub>2</sub>                   |
| Tromethamine             | Oxytocic                     | 77-86-1     |      | C <sub>4</sub> H <sub>11</sub> NO <sub>3</sub>                                  |
| Tropabazate              | Unclassified                 | 64294-94-6  |      | C <sub>15</sub> H <sub>19</sub> N <sub>3</sub> O <sub>4</sub>                   |
| Tropanserine             | Antidepressant               | 85181-40-4  |      | C <sub>17</sub> H <sub>23</sub> NO <sub>2</sub>                                 |
| Tropapride               | Antipsychotic                | 76352-13-1  |      | C <sub>23</sub> H <sub>28</sub> N <sub>2</sub> O <sub>3</sub>                   |
| Tropatepine              | Antipsychotic                | 27574-24-9  |      | C <sub>22</sub> H <sub>23</sub> NS                                              |
| Tropenziline Bromide     | Antispasmodic                | 143-92-0    |      | C <sub>24</sub> H <sub>30</sub> BrNO <sub>4</sub>                               |
| Tropicamide              | Mydriatic                    | 1508-75-4   |      | C <sub>17</sub> H <sub>20</sub> N <sub>2</sub> O <sub>2</sub>                   |
| Tropigline               | Unclassified                 | 533-08-4    |      | C <sub>13</sub> H <sub>21</sub> NO <sub>2</sub>                                 |
| Tropirine                | Antihistamine                | 19410-02-7  |      | C <sub>22</sub> H <sub>24</sub> N <sub>2</sub> O                                |
| Tropisetron              | Antiemetic                   | 89565-68-4  | Y    | C <sub>17</sub> H <sub>20</sub> N <sub>2</sub> O <sub>2</sub>                   |
| Tropodifene              | Antihypertensive             | 15790-02-0  |      | C <sub>25</sub> H <sub>29</sub> NO <sub>4</sub>                                 |
| Troquidazole             | Antiprotozoal                | 108001-60-1 |      | C <sub>14</sub> H <sub>15</sub> N <sub>5</sub> O <sub>3</sub>                   |
| Trospectomycin           | Antibiotic                   | 88669-04-9  |      | C <sub>17</sub> H <sub>30</sub> N <sub>2</sub> O <sub>7</sub>                   |
| Trospium                 | Antispasmodic                | 47608-32-2  |      | C <sub>25</sub> H <sub>30</sub> ClNO <sub>3</sub>                               |
| Trovafloxacin            | Antibacterial                | 147059-72-1 | Y    | C <sub>20</sub> H <sub>15</sub> F <sub>3</sub> N <sub>4</sub> O <sub>3</sub>    |
| Trovirdine               | Antiviral                    | 149488-17-5 |      | C <sub>13</sub> H <sub>13</sub> BrN <sub>4</sub> S                              |
| Troxacitabine            | Antineoplastic               | 145918-75-8 |      | C <sub>8</sub> H <sub>11</sub> N <sub>3</sub> O <sub>4</sub>                    |
| Troxerutin               | Capillary Protectant         | 7085-55-4   |      | C <sub>33</sub> H <sub>42</sub> O <sub>19</sub>                                 |
| Troxipide                | Antilucerative               | 30751-05-4  |      | C <sub>15</sub> H <sub>22</sub> N <sub>2</sub> O <sub>4</sub>                   |
| Troxypyrrolium Tosilate  | Mydriatic                    | 3612-98-4   |      | C <sub>25</sub> H <sub>35</sub> NO <sub>8</sub> S                               |
| Truxicuriem Iodide       | Muscle Relaxant              | 4304-01-2   |      | C <sub>34</sub> H <sub>52</sub> I <sub>2</sub> N <sub>2</sub> O <sub>4</sub>    |
| Truxipicuriem Iodide     | Muscle Relaxant              | 35515-77-6  |      | C <sub>38</sub> H <sub>56</sub> I <sub>2</sub> N <sub>2</sub> O <sub>4</sub>    |
| Tryparsamide             | Antiprotozoal                | 618-25-7    |      | C <sub>8</sub> H <sub>11</sub> AsN <sub>2</sub> O <sub>4</sub>                  |
| Tuaminoheptane           | Decongestant                 | 123-82-0    |      | C <sub>7</sub> H <sub>17</sub> N                                                |
| Tubocurarine             | Neuromuscular Blocking Agent | 57-95-4     |      | C <sub>37</sub> H <sub>41</sub> N <sub>2</sub> O <sub>6</sub>                   |
| Tubulozole               | Antineoplastic               | 84697-22-3  |      | C <sub>23</sub> H <sub>23</sub> Cl <sub>2</sub> N <sub>3</sub> O <sub>4</sub> S |
| Tucarezol                | Immunomodulator              | 84290-27-7  |      | C <sub>13</sub> H <sub>12</sub> O <sub>5</sub>                                  |
| Tuclazepam               | Anxiolytic                   | 51037-88-8  |      | C <sub>17</sub> H <sub>16</sub> Cl <sub>2</sub> N <sub>2</sub> O                |
| Tulathromycin            | Antibacterial                | 217500-96-4 |      | C <sub>41</sub> H <sub>79</sub> N <sub>3</sub> O <sub>12</sub>                  |
| Tulobuterol              | Bronchodilator               | 41570-61-0  |      | C <sub>12</sub> H <sub>18</sub> ClNO                                            |
| Tulopafant               | Anticoagulant                | 116289-53-3 |      | C <sub>25</sub> H <sub>19</sub> N <sub>3</sub> O <sub>2</sub> S                 |
| Turosteride              | Antineoplastic               | 137099-09-3 |      | C <sub>27</sub> H <sub>45</sub> N <sub>3</sub> O <sub>3</sub>                   |
| Tuvatidine               | Antilucerative               | 91257-14-6  |      | C <sub>10</sub> H <sub>17</sub> N <sub>9</sub> O <sub>2</sub> S <sub>3</sub>    |
| Tybamate                 | Anxiolytic                   | 4268-36-4   |      | C <sub>13</sub> H <sub>26</sub> N <sub>2</sub> O <sub>4</sub>                   |
| Tylosin                  | Antibiotic                   | 1401-69-0   |      | C <sub>46</sub> H <sub>77</sub> NO <sub>17</sub>                                |
| Tymazoline               | Decongestant                 | 24243-97-8  |      | C <sub>14</sub> H <sub>20</sub> N <sub>2</sub> O                                |
| Ubenimex                 | Immunomodulator              | 58970-76-6  |      | C <sub>16</sub> H <sub>24</sub> N <sub>2</sub> O <sub>4</sub>                   |

Table S1. Cont.

| Common Name                    | Indication                   | CAS Number  | Oral | Molecular Formula                                                             |
|--------------------------------|------------------------------|-------------|------|-------------------------------------------------------------------------------|
| Ubidecarenone                  | Antihypertensive             | 303-98-0    |      | C <sub>59</sub> H <sub>90</sub> O <sub>4</sub>                                |
| Ubisindine                     | Unclassified                 | 26070-78-0  |      | C <sub>20</sub> H <sub>24</sub> N <sub>2</sub> O                              |
| Udenafil                       | Erectile Dysfunction         | 268203-93-6 | Y    | C <sub>25</sub> H <sub>36</sub> N <sub>6</sub> O <sub>4</sub> S               |
| Ufenamate                      | Antiinflammatory             | 67330-25-0  |      | C <sub>18</sub> H <sub>18</sub> F <sub>3</sub> NO <sub>2</sub>                |
| Ufiprazole                     | Anxiolytic                   | 73590-85-9  |      | C <sub>17</sub> H <sub>19</sub> N <sub>3</sub> O <sub>2</sub> S               |
| Uldazepam                      | Anxiolytic                   | 28546-58-9  |      | C <sub>18</sub> H <sub>15</sub> Cl <sub>2</sub> N <sub>3</sub> O              |
| Ulifloxacin                    | Antibiotic                   | 112984-60-8 |      | C <sub>16</sub> H <sub>16</sub> FN <sub>3</sub> O <sub>3</sub> S              |
| Umespiron                      | Antidepressant               | 107736-98-1 |      | C <sub>28</sub> H <sub>40</sub> N <sub>4</sub> O <sub>5</sub>                 |
| Undecylenic Acid               | Antifungal                   | 112-38-9    |      | C <sub>11</sub> H <sub>20</sub> O <sub>2</sub>                                |
| Unoprostone                    | Prostaglandin                | 120373-36-6 |      | C <sub>22</sub> H <sub>38</sub> O <sub>5</sub>                                |
| Upenazime                      | Antihypertensive             | 95268-62-5  |      | C <sub>14</sub> H <sub>30</sub> N <sub>4</sub> O <sub>2</sub>                 |
| Upidosin                       | Antihypertensive             | 152735-23-4 |      | C <sub>31</sub> H <sub>33</sub> N <sub>3</sub> O <sub>4</sub>                 |
| Uracil                         | Antineoplastic               | 66-22-8     | Y    | C <sub>4</sub> H <sub>4</sub> N <sub>2</sub> O <sub>2</sub>                   |
| Uracil Mustard                 | Antineoplastic               | 66-75-1     |      | C <sub>8</sub> H <sub>11</sub> Cl <sub>2</sub> N <sub>3</sub> O <sub>2</sub>  |
| Urapidil                       | Antihypertensive             | 34661-75-1  |      | C <sub>20</sub> H <sub>29</sub> N <sub>5</sub> O <sub>3</sub>                 |
| Urea                           | Diuretic                     | 57-13-6     |      | CH <sub>4</sub> N <sub>2</sub> O                                              |
| Uredepa                        | Antineoplastic               | 302-49-8    |      | C <sub>7</sub> H <sub>14</sub> N <sub>3</sub> O <sub>3</sub> P                |
| Uredofos                       | Anthelminthic                | 52406-01-6  |      | C <sub>19</sub> H <sub>25</sub> N <sub>4</sub> O <sub>6</sub> PS <sub>2</sub> |
| Urefibrate                     | Bone Resorption Inhibitor    | 38647-79-9  |      | C <sub>15</sub> H <sub>12</sub> Cl <sub>2</sub> N <sub>2</sub> O <sub>4</sub> |
| Urethane                       | Antineoplastic               | 51-79-6     |      | C <sub>3</sub> H <sub>7</sub> NO <sub>2</sub>                                 |
| Ursodiol                       | Anticholelithogenic          | 128-13-2    | Y    | C <sub>24</sub> H <sub>40</sub> O <sub>4</sub>                                |
| Ursulcholic Acid               | Anticholelithogenic          | 88426-32-8  |      | C <sub>24</sub> H <sub>40</sub> O <sub>10</sub> S <sub>2</sub>                |
| Utibapril                      | Antihypertensive             | 109683-61-6 |      | C <sub>22</sub> H <sub>31</sub> N <sub>3</sub> O <sub>5</sub> S               |
| Utibaprilat                    | Antihypertensive             | 109683-79-6 |      | C <sub>20</sub> H <sub>27</sub> N <sub>3</sub> O <sub>5</sub> S               |
| Vadocaine                      | Anesthetic                   | 72005-58-4  |      | C <sub>18</sub> H <sub>28</sub> N <sub>2</sub> O <sub>2</sub>                 |
| Valacyclovir                   | Antiviral                    | 124832-26-4 | Y    | C <sub>13</sub> H <sub>20</sub> N <sub>6</sub> O <sub>4</sub>                 |
| Valategrast                    | Antihistamine                | 220847-86-9 |      | C <sub>30</sub> H <sub>32</sub> Cl <sub>3</sub> N <sub>3</sub> O <sub>4</sub> |
| Valconazole                    | Antifungal                   | 56097-80-4  |      | C <sub>16</sub> H <sub>18</sub> Cl <sub>2</sub> N <sub>2</sub> O <sub>2</sub> |
| Valdecobix                     | Antiinflammatory             | 181695-72-7 | Y    | C <sub>16</sub> H <sub>14</sub> N <sub>2</sub> O <sub>3</sub> S               |
| Valdetamide                    | Sedative                     | 512-48-1    |      | C <sub>9</sub> H <sub>17</sub> NO                                             |
| Valdipromide                   | Analgesic                    | 52061-73-1  |      | C <sub>11</sub> H <sub>23</sub> NO                                            |
| Valethamate Bromide            | Antispasmodic                | 90-22-2     |      | C <sub>19</sub> H <sub>32</sub> BrNO <sub>2</sub>                             |
| Valganciclovir                 | Antiviral                    | 175865-60-8 | Y    | C <sub>14</sub> H <sub>22</sub> N <sub>6</sub> O <sub>5</sub>                 |
| Valnemulin                     | Antibacterial                | 101312-92-9 |      | C <sub>31</sub> H <sub>54</sub> N <sub>2</sub> O <sub>8</sub> S               |
| Valnoctamide                   | Anxiolytic                   | 4171-13-5   |      | C <sub>8</sub> H <sub>17</sub> NO                                             |
| Valofane                       | Sedative                     | 3258-51-3   |      | C <sub>10</sub> H <sub>14</sub> N <sub>2</sub> O <sub>4</sub>                 |
| Valomaciclovir                 | Antiviral                    | 195157-34-7 |      | C <sub>15</sub> H <sub>24</sub> N <sub>6</sub> O <sub>4</sub>                 |
| Valopicitabine                 | Antineoplastic               | 640281-90-9 |      | C <sub>15</sub> H <sub>24</sub> N <sub>4</sub> O <sub>6</sub>                 |
| Valperinol                     | Antihypertensive             | 64860-67-9  |      | C <sub>16</sub> H <sub>27</sub> NO <sub>4</sub>                               |
| Valproate Pivoxil              | Anticonvulsant               | 77372-61-3  |      | C <sub>14</sub> H <sub>26</sub> O <sub>4</sub>                                |
| Valproic Acid                  | Anticonvulsant               | 99-66-1     |      | C <sub>8</sub> H <sub>16</sub> O <sub>2</sub>                                 |
| Valpromide                     | Anticonvulsant               | 2430-27-5   |      | C <sub>8</sub> H <sub>17</sub> NO                                             |
| Valrocemide                    | Anticonvulsant               | 92262-58-3  |      | C <sub>10</sub> H <sub>20</sub> N <sub>2</sub> O <sub>2</sub>                 |
| Valrubicin                     | Antineoplastic               | 56124-62-0  |      | C <sub>34</sub> H <sub>36</sub> F <sub>3</sub> NO <sub>13</sub>               |
| Valsartan                      | Antihypertensive             | 137862-53-4 | Y    | C <sub>24</sub> H <sub>29</sub> N <sub>5</sub> O <sub>3</sub>                 |
| Valtorcitabine Dihydrochloride | Antiviral                    | 380886-95-3 |      | C <sub>14</sub> H <sub>22</sub> N <sub>4</sub> O <sub>5</sub>                 |
| Valtrate                       | Sedative                     | 18296-44-1  |      | C <sub>22</sub> H <sub>30</sub> O <sub>8</sub>                                |
| Vamicamide                     | Mydriatic                    | 132373-81-0 |      | C <sub>18</sub> H <sub>23</sub> N <sub>3</sub> O                              |
| Vandetanib                     | Ophthalmic                   | 443913-73-3 | Y    | C <sub>22</sub> H <sub>24</sub> BrFN <sub>4</sub> O <sub>2</sub>              |
| Vanepirim                      | Antibiotic                   | 84854-86-4  |      | C <sub>23</sub> H <sub>28</sub> N <sub>4</sub> O <sub>8</sub> S               |
| Vanitolidide                   | Choleretic                   | 17692-71-6  |      | C <sub>12</sub> H <sub>15</sub> NO <sub>3</sub> S                             |
| Vanoxerine                     | Antidepressant               | 67469-69-6  |      | C <sub>28</sub> H <sub>32</sub> F <sub>2</sub> N <sub>2</sub> O               |
| Vanylidisulfamide              | Antibiotic                   | 119-85-7    |      | C <sub>20</sub> H <sub>22</sub> N <sub>4</sub> O <sub>6</sub> S <sub>2</sub>  |
| Vapiprost                      | Anticoagulant                | 85505-64-2  |      | C <sub>30</sub> H <sub>39</sub> NO <sub>4</sub>                               |
| Vardenafil                     | Erectile Dysfunction         | 224785-90-4 | Y    | C <sub>23</sub> H <sub>32</sub> N <sub>6</sub> O <sub>4</sub> S               |
| Varenicline Tartrate           | Antidepressant               | 249296-44-4 |      | C <sub>13</sub> H <sub>13</sub> N <sub>3</sub>                                |
| Varespladib Sodium             | Antihypotensive              | 172732-68-2 |      | C <sub>21</sub> H <sub>20</sub> N <sub>2</sub> O <sub>5</sub>                 |
| Vatalanib                      | Antineoplastic               | 212141-54-3 |      | C <sub>20</sub> H <sub>15</sub> ClN <sub>4</sub>                              |
| Vatanidipine                   | Antiarrhythmic               | 116308-55-5 |      | C <sub>41</sub> H <sub>42</sub> N <sub>4</sub> O <sub>6</sub>                 |
| Vebufloxacin                   | Antibiotic                   | 79644-90-9  |      | C <sub>19</sub> H <sub>22</sub> FN <sub>3</sub> O <sub>3</sub>                |
| Vecuronium Bromide             | Neuromuscular Blocking Agent | 50700-72-6  |      | C <sub>34</sub> H <sub>57</sub> BrN <sub>2</sub> O <sub>4</sub>               |
| Vedaclidine                    | Antiparkinsonian             | 141575-50-0 |      | C <sub>13</sub> H <sub>21</sub> N <sub>3</sub> S <sub>2</sub>                 |

Table S1. Cont.

| Common Name          | Indication        | CAS Number  | Oral | Molecular Formula                                                              |
|----------------------|-------------------|-------------|------|--------------------------------------------------------------------------------|
| Vedaprofen           | Antiinflammatory  | 71109-09-6  |      | C <sub>19</sub> H <sub>22</sub> O <sub>2</sub>                                 |
| Velaresol            | Immunomodulator   | 77858-21-0  |      | C <sub>12</sub> H <sub>14</sub> O <sub>5</sub>                                 |
| Velnacrine           | Nootropic         | 124027-47-0 |      | C <sub>13</sub> H <sub>14</sub> N <sub>2</sub> O                               |
| Venlafaxine          | Antidepressant    | 93413-69-5  | Y    | C <sub>17</sub> H <sub>27</sub> NO <sub>2</sub>                                |
| Venritidine          | Antilcerative     | 93064-63-2  |      | C <sub>18</sub> H <sub>26</sub> N <sub>4</sub> O <sub>3</sub> S                |
| Veradoline           | Analgesic         | 82924-71-8  |      | C <sub>20</sub> H <sub>26</sub> N <sub>2</sub> O <sub>2</sub>                  |
| Veralipride          | Antipsychotic     | 66644-81-3  |      | C <sub>17</sub> H <sub>25</sub> N <sub>3</sub> O <sub>5</sub> S                |
| Verapamil            | Antihypertensive  | 52-53-9     | Y    | C <sub>27</sub> H <sub>38</sub> N <sub>2</sub> O <sub>4</sub>                  |
| Verazide             | Antibacterial     | 93-47-0     |      | C <sub>15</sub> H <sub>15</sub> N <sub>3</sub> O <sub>3</sub>                  |
| Verilopam            | Analgesic         | 68318-20-7  |      | C <sub>20</sub> H <sub>26</sub> N <sub>2</sub> O <sub>2</sub>                  |
| Verlukast            | Bronchodilator    | 120443-16-5 |      | C <sub>26</sub> H <sub>27</sub> ClN <sub>2</sub> O <sub>3</sub> S <sub>2</sub> |
| Verofylline          | Bronchodilator    | 66172-75-6  |      | C <sub>12</sub> H <sub>18</sub> N <sub>4</sub> O <sub>2</sub>                  |
| Verteporfin          | Antineoplastic    | 121310-58-5 |      | C <sub>40</sub> H <sub>40</sub> N <sub>4</sub> O <sub>8</sub>                  |
| Vesnarinone          | Cardiotonic       | 81840-15-5  |      | C <sub>22</sub> H <sub>25</sub> N <sub>3</sub> O <sub>4</sub>                  |
| Vestipitant Mesylate | Antidepressant    | 334476-46-9 |      | C <sub>23</sub> H <sub>24</sub> F <sub>7</sub> N <sub>3</sub> O                |
| Vetrabutine          | Antispasmodic     | 3735-45-3   |      | C <sub>20</sub> H <sub>27</sub> NO <sub>2</sub>                                |
| Vicriviroc Maleate   | Antiviral         | 306296-47-9 |      | C <sub>28</sub> H <sub>38</sub> F <sub>3</sub> N <sub>5</sub> O <sub>2</sub>   |
| Vidarabine           | Antiviral         | 5536-17-4   |      | C <sub>10</sub> H <sub>13</sub> N <sub>5</sub> O <sub>4</sub>                  |
| Vidarabine Phosphate | Antineoplastic    | 29984-33-6  |      | C <sub>10</sub> H <sub>14</sub> N <sub>5</sub> O <sub>7</sub> P                |
| Vigabatrin           | Anticonvulsant    | 68506-86-5  | Y    | C <sub>6</sub> H <sub>11</sub> NO <sub>2</sub>                                 |
| Vilazodone           | Antidepressant    | 163521-12-8 | Y    | C <sub>26</sub> H <sub>27</sub> N <sub>5</sub> O <sub>2</sub>                  |
| Vildagliptin         | Antidiabetic      | 274901-16-5 | Y    | C <sub>17</sub> H <sub>25</sub> N <sub>3</sub> O <sub>2</sub>                  |
| Viloxazine           | Antidepressant    | 46817-91-8  |      | C <sub>13</sub> H <sub>19</sub> NO <sub>3</sub>                                |
| Viminol              | Analgesic         | 21363-18-8  |      | C <sub>21</sub> H <sub>31</sub> ClN <sub>2</sub> O                             |
| Vinbarbital          | Sedative          | 125-42-8    |      | C <sub>11</sub> H <sub>16</sub> N <sub>2</sub> O <sub>3</sub>                  |
| Vinblastine          | Antineoplastic    | 865-21-4    |      | C <sub>46</sub> H <sub>58</sub> N <sub>4</sub> O <sub>9</sub>                  |
| Vinburnine           | Vasodilator       | 4880-88-0   |      | C <sub>19</sub> H <sub>22</sub> N <sub>2</sub> O                               |
| Vincamine            | Antineoplastic    | 1617-90-9   |      | C <sub>21</sub> H <sub>26</sub> N <sub>2</sub> O <sub>3</sub>                  |
| Vincanol             | Anesthetic        | 19877-89-5  |      | C <sub>19</sub> H <sub>24</sub> N <sub>2</sub> O                               |
| Vincantril           | Unclassified      | 65285-58-7  |      | C <sub>14</sub> H <sub>13</sub> ClN <sub>2</sub> O                             |
| Vincofos             | Anthelmintic      | 17196-88-2  |      | C <sub>11</sub> H <sub>21</sub> Cl <sub>2</sub> O <sub>4</sub> P               |
| Vinconate            | Nootropic         | 70704-03-9  |      | C <sub>18</sub> H <sub>20</sub> N <sub>2</sub> O <sub>2</sub>                  |
| Vincristine          | Antineoplastic    | 57-22-7     |      | C <sub>46</sub> H <sub>56</sub> N <sub>4</sub> O <sub>10</sub>                 |
| Vindeburnol          | Nootropic         | 68779-67-9  |      | C <sub>17</sub> H <sub>20</sub> N <sub>2</sub> O                               |
| Vindesine            | Antineoplastic    | 53643-48-4  |      | C <sub>43</sub> H <sub>55</sub> N <sub>5</sub> O <sub>7</sub>                  |
| Vinepidine Sulfate   | Antineoplastic    | 68170-69-4  |      | C <sub>46</sub> H <sub>56</sub> N <sub>4</sub> O <sub>9</sub>                  |
| Vinflunine           | Antineoplastic    | 162652-95-1 |      | C <sub>45</sub> H <sub>54</sub> F <sub>2</sub> N <sub>4</sub> O <sub>8</sub>   |
| Vinformide           | Unclassified      | 54022-49-0  |      | C <sub>46</sub> H <sub>54</sub> N <sub>4</sub> O <sub>10</sub>                 |
| Vinfosiltine         | Antineoplastic    | 123286-00-0 |      | C <sub>51</sub> H <sub>72</sub> N <sub>5</sub> O <sub>10</sub> P               |
| Vinglycinat Sulfate  | Antineoplastic    | 865-24-7    |      | C <sub>48</sub> H <sub>63</sub> N <sub>5</sub> O <sub>9</sub>                  |
| Vinleucinol          | Antineoplastic    | 81571-28-0  |      | C <sub>51</sub> H <sub>69</sub> N <sub>5</sub> O <sub>9</sub>                  |
| Vinleurosine Sulfate | Antineoplastic    | 23360-92-1  |      | C <sub>46</sub> H <sub>56</sub> N <sub>4</sub> O <sub>9</sub>                  |
| Vinmegallate         | Dermatologic      | 83482-77-3  |      | C <sub>30</sub> H <sub>32</sub> N <sub>2</sub> O <sub>5</sub>                  |
| Vinorelbine          | Antineoplastic    | 71486-22-1  | Y    | C <sub>45</sub> H <sub>54</sub> N <sub>4</sub> O <sub>8</sub>                  |
| Vinpocetine          | Vasodilator       | 42971-09-5  |      | C <sub>22</sub> H <sub>26</sub> N <sub>2</sub> O <sub>2</sub>                  |
| Vinpoline            | Unclassified      | 57694-27-6  |      | C <sub>23</sub> H <sub>30</sub> N <sub>2</sub> O <sub>3</sub>                  |
| Vinrosidine Sulfate  | Antineoplastic    | 15228-71-4  |      | C <sub>46</sub> H <sub>58</sub> N <sub>4</sub> O <sub>9</sub>                  |
| Vintoperol           | Vasodilator       | 106498-99-1 |      | C <sub>18</sub> H <sub>24</sub> N <sub>2</sub> O                               |
| Vinatriptol          | Antineoplastic    | 81600-06-8  |      | C <sub>56</sub> H <sub>68</sub> N <sub>6</sub> O <sub>9</sub>                  |
| Vinyl Ether          | Anesthetic        | 109-93-3    |      | C <sub>4</sub> H <sub>6</sub> O                                                |
| Vinylbital           | Sedative          | 2430-49-1   |      | C <sub>11</sub> H <sub>16</sub> N <sub>2</sub> O <sub>3</sub>                  |
| Vinzolidine Sulfate  | Antineoplastic    | 67699-40-5  |      | C <sub>48</sub> H <sub>58</sub> ClN <sub>5</sub> O <sub>9</sub>                |
| Viomycin             | Antibiotic        | 32988-50-4  |      | C <sub>25</sub> H <sub>43</sub> N <sub>13</sub> O <sub>10</sub>                |
| Viprostol            | Vasodilator       | 73647-73-1  |      | C <sub>23</sub> H <sub>36</sub> O <sub>5</sub>                                 |
| Viqualine            | Alcohol Deterrant | 72714-74-0  |      | C <sub>20</sub> H <sub>26</sub> N <sub>2</sub> O                               |
| Viquidil             | Vasodilator       | 84-55-9     |      | C <sub>20</sub> H <sub>24</sub> N <sub>2</sub> O <sub>2</sub>                  |
| Viroxime             | Antiviral         | 63198-97-0  |      | C <sub>17</sub> H <sub>18</sub> N <sub>4</sub> O <sub>3</sub> S                |
| Visnadine            | Vasodilator       | 477-32-7    |      | C <sub>21</sub> H <sub>24</sub> O <sub>7</sub>                                 |
| Visnafylline         | Bronchodilator    | 17243-56-0  |      | C <sub>25</sub> H <sub>29</sub> N <sub>5</sub> O <sub>7</sub>                  |
| Vofopitant           | Antiemetic        | 168266-90-8 |      | C <sub>21</sub> H <sub>23</sub> F <sub>3</sub> N <sub>6</sub> O                |
| Voglibose            | Antidiabetic      | 83480-29-9  | Y    | C <sub>10</sub> H <sub>21</sub> NO <sub>7</sub>                                |
| Volazocine           | Analgesic         | 15686-68-7  |      | C <sub>18</sub> H <sub>25</sub> N                                              |
| Volpristin           | Antibiotic        | 21102-49-8  |      | C <sub>28</sub> H <sub>37</sub> N <sub>3</sub> O <sub>7</sub>                  |

Table S1. Cont.

| Common Name         | Indication           | CAS Number  | Oral | Molecular Formula                                                            |
|---------------------|----------------------|-------------|------|------------------------------------------------------------------------------|
| Voriconazole        | Antifungal           | 137234-62-9 | Y    | C <sub>16</sub> H <sub>14</sub> F <sub>3</sub> N <sub>5</sub> O              |
| Vorinostat          | Antineoplastic       | 149647-78-9 | Y    | C <sub>14</sub> H <sub>20</sub> N <sub>2</sub> O <sub>3</sub>                |
| Vorozole            | Antineoplastic       | 129731-10-8 |      | C <sub>16</sub> H <sub>13</sub> ClN <sub>6</sub>                             |
| Voxergolide         | Antiparkinsonian     | 89651-00-3  |      | C <sub>16</sub> H <sub>20</sub> N <sub>2</sub> O <sub>5</sub>                |
| Warfarin            | Anticoagulant        | 81-81-2     |      | C <sub>19</sub> H <sub>16</sub> O <sub>4</sub>                               |
| Xaliproden          | Nootropic            | 135354-02-8 |      | C <sub>24</sub> H <sub>22</sub> F <sub>3</sub> N                             |
| Xamoterol           | Cardiotonic          | 81801-12-9  |      | C <sub>16</sub> H <sub>25</sub> N <sub>3</sub> O <sub>5</sub>                |
| Xanomeline          | Cholinergic          | 131986-45-3 |      | C <sub>14</sub> H <sub>23</sub> N <sub>3</sub> OS                            |
| Xanoxic Acid        | Bronchodilator       | 33459-27-7  |      | C <sub>17</sub> H <sub>14</sub> O <sub>5</sub>                               |
| Xanthiol            | Unclassified         | 14008-71-0  |      | C <sub>23</sub> H <sub>29</sub> ClN <sub>2</sub> OS                          |
| Xantifibrate        | Antihyperlipidemic   | 2530-97-4   |      | C <sub>13</sub> H <sub>21</sub> N <sub>5</sub> O <sub>4</sub>                |
| Xantocillin         | Antibiotic           | 580-74-5    |      | C <sub>18</sub> H <sub>12</sub> N <sub>2</sub> O <sub>2</sub>                |
| Xemilofiban         | Antianginal          | 149820-74-6 | Y    | C <sub>18</sub> H <sub>22</sub> N <sub>4</sub> O <sub>4</sub>                |
| Xenalipin           | Antihyperlipidemic   | 84392-17-6  |      | C <sub>14</sub> H <sub>9</sub> F <sub>3</sub> O <sub>2</sub>                 |
| Xenazoic Acid       | Antiviral            | 1174-11-4   |      | C <sub>23</sub> H <sub>21</sub> NO <sub>4</sub>                              |
| Xenbucin            | Antihyperlipidemic   | 959-10-4    |      | C <sub>16</sub> H <sub>16</sub> O <sub>2</sub>                               |
| Xenipentone         | Unclassified         | 55845-78-8  |      | C <sub>17</sub> H <sub>16</sub> O                                            |
| Xenthiorate         | Unclassified         | 7009-79-2   |      | C <sub>22</sub> H <sub>29</sub> NOS                                          |
| Xenygloxal          | Unclassified         | 1094-85-5   |      | C <sub>16</sub> H <sub>14</sub> O <sub>6</sub>                               |
| Xenyhexenic Acid    | Unclassified         | 95040-85-0  | Y    | C <sub>18</sub> H <sub>18</sub> O <sub>2</sub>                               |
| Xenytropium Bromide | Antispasmodic        | 511-55-7    |      | C <sub>30</sub> H <sub>34</sub> BrNO <sub>3</sub>                            |
| Xibenolol           | Antiarrhythmic       | 30187-90-7  |      | C <sub>15</sub> H <sub>25</sub> NO <sub>2</sub>                              |
| Xibornol            | Antibacterial        | 13741-18-9  |      | C <sub>18</sub> H <sub>26</sub> O                                            |
| Xidecaflur          | Unclassified         | 13127-82-7  |      | C <sub>22</sub> H <sub>45</sub> NO <sub>2</sub>                              |
| Xilobam             | Muscle Relaxant      | 50528-97-7  |      | C <sub>14</sub> H <sub>19</sub> N <sub>3</sub> O                             |
| Ximelagatran        | Antithrombotic       | 192939-46-1 |      | C <sub>24</sub> H <sub>35</sub> N <sub>5</sub> O <sub>5</sub>                |
| Ximoprofen          | Antiinflammatory     | 56187-89-4  |      | C <sub>15</sub> H <sub>19</sub> NO <sub>3</sub>                              |
| Xinidamine          | Analgesic            | 50264-78-3  |      | C <sub>17</sub> H <sub>16</sub> N <sub>2</sub> O <sub>2</sub>                |
| Xinomiline          | Unclassified         | 52832-91-4  |      | C <sub>5</sub> H <sub>10</sub> N <sub>2</sub> O                              |
| Xipamide            | Diuretic             | 14293-44-8  |      | C <sub>15</sub> H <sub>15</sub> ClN <sub>2</sub> O <sub>4</sub> S            |
| Xipranolol          | Antihypertensive     | 19179-78-3  |      | C <sub>23</sub> H <sub>33</sub> NO <sub>2</sub>                              |
| Xorphanol Mesylate  | Analgesic            | 77287-89-9  |      | C <sub>23</sub> H <sub>31</sub> NO                                           |
| Xylamidine Tosylate | Antidepressant       | 6443-50-1   |      | C <sub>19</sub> H <sub>24</sub> N <sub>2</sub> O <sub>2</sub>                |
| Xylazine            | Sedative             | 7361-61-7   |      | C <sub>12</sub> H <sub>16</sub> N <sub>2</sub> S                             |
| Xylocoumarol        | Anticoagulant        | 15301-97-0  |      | C <sub>17</sub> H <sub>14</sub> O <sub>3</sub>                               |
| Xylometazoline      | Decongestant         | 526-36-3    |      | C <sub>16</sub> H <sub>24</sub> N <sub>2</sub>                               |
| Xyloxemine          | Antitussive          | 1600-19-7   |      | C <sub>23</sub> H <sub>33</sub> NO <sub>2</sub>                              |
| Yohimbic Acid       | Erectile Dysfunction | 522-87-2    |      | C <sub>20</sub> H <sub>24</sub> N <sub>2</sub> O <sub>3</sub>                |
| Yohimbine           | Erectile Dysfunction | 146-48-5    |      | C <sub>21</sub> H <sub>26</sub> N <sub>2</sub> O <sub>3</sub>                |
| Zabicipril          | Antihypertensive     | 83059-56-7  |      | C <sub>23</sub> H <sub>32</sub> N <sub>2</sub> O <sub>5</sub>                |
| Zabiciprilat        | Antihypertensive     | 90103-92-7  |      | C <sub>21</sub> H <sub>28</sub> N <sub>2</sub> O <sub>5</sub>                |
| Zabofloxacin        | Antibiotic           | 219680-11-2 | Y    | C <sub>19</sub> H <sub>20</sub> FN <sub>5</sub> O <sub>4</sub>               |
| Zacopride           | Antiemetic           | 90182-92-6  |      | C <sub>15</sub> H <sub>20</sub> ClN <sub>3</sub> O <sub>2</sub>              |
| Zafirlukast         | Bronchodilator       | 107753-78-6 | Y    | C <sub>31</sub> H <sub>33</sub> N <sub>3</sub> O <sub>6</sub> S              |
| Zafuleptine         | Antidepressant       | 59209-97-1  |      | C <sub>17</sub> H <sub>26</sub> FNO <sub>2</sub>                             |
| Zalcitabine         | Antiviral            | 7481-89-2   | Y    | C <sub>9</sub> H <sub>13</sub> N <sub>3</sub> O <sub>3</sub>                 |
| Zaldaride           | Antidiarrheal        | 109826-26-8 |      | C <sub>26</sub> H <sub>28</sub> N <sub>4</sub> O <sub>2</sub>                |
| Zaleplon            | Sedative             | 151319-34-5 | Y    | C <sub>17</sub> H <sub>15</sub> N <sub>5</sub> O                             |
| Zalospirone         | Anxiolytic           | 114298-18-9 |      | C <sub>24</sub> H <sub>29</sub> N <sub>5</sub> O <sub>2</sub>                |
| Zaltidine           | Antiulcerative       | 85604-00-8  |      | C <sub>8</sub> H <sub>10</sub> N <sub>6</sub> S                              |
| Zaltoprofen         | Antiinflammatory     | 74711-43-6  |      | C <sub>17</sub> H <sub>14</sub> O <sub>3</sub> S                             |
| Zamifenacin         | Mydriatic            | 127308-82-1 |      | C <sub>27</sub> H <sub>29</sub> NO <sub>3</sub>                              |
| Zanamivir           | Antiviral            | 139110-80-8 |      | C <sub>12</sub> H <sub>20</sub> N <sub>4</sub> O <sub>7</sub>                |
| Zanapezil           | Nootropic            | 142852-50-4 |      | C <sub>25</sub> H <sub>32</sub> N <sub>2</sub> O                             |
| Zankiren            | Antihypertensive     | 138742-43-5 |      | C <sub>35</sub> H <sub>55</sub> N <sub>5</sub> O <sub>6</sub> S <sub>2</sub> |
| Zanoterone          | Steroid              | 107000-34-0 |      | C <sub>23</sub> H <sub>32</sub> N <sub>2</sub> O <sub>3</sub> S              |
| Zapizolam           | Anxiolytic           | 64098-32-4  |      | C <sub>15</sub> H <sub>9</sub> Cl <sub>2</sub> N <sub>5</sub>                |
| Zaprinast           | Antihistaminic       | 37762-06-4  |      | C <sub>13</sub> H <sub>13</sub> N <sub>5</sub> O <sub>2</sub>                |
| Zardaverine         | Bronchodilator       | 101975-10-4 |      | C <sub>12</sub> H <sub>10</sub> F <sub>2</sub> N <sub>2</sub> O <sub>3</sub> |
| Zatebradine         | Antianginal          | 85175-67-3  |      | C <sub>26</sub> H <sub>36</sub> N <sub>2</sub> O <sub>5</sub>                |
| Zatoseptron Maleate | Antimigraine         | 123482-22-4 |      | C <sub>19</sub> H <sub>25</sub> ClN <sub>2</sub> O <sub>2</sub>              |
| Zelandopam          | Antihypertensive     | 139233-53-7 |      | C <sub>15</sub> H <sub>15</sub> NO <sub>4</sub>                              |
| Zenarestat          | Antidiabetic         | 112733-06-9 |      | C <sub>17</sub> H <sub>11</sub> BrClFN <sub>2</sub> O <sub>4</sub>           |

Table S1. Cont.

| Common Name                 | Indication                | CAS Number  | Oral | Molecular Formula                                                                           |
|-----------------------------|---------------------------|-------------|------|---------------------------------------------------------------------------------------------|
| Zenazocine Mesylate         | Analgesic                 | 68681-43-6  |      | C <sub>23</sub> H <sub>35</sub> NO <sub>2</sub>                                             |
| Zepastine                   | Antineoplastic            | 28810-23-3  |      | C <sub>22</sub> H <sub>26</sub> N <sub>2</sub> O <sub>3</sub> S                             |
| Zeranol                     | Steroid                   | 26538-44-3  |      | C <sub>18</sub> H <sub>26</sub> O <sub>5</sub>                                              |
| Zetidoline                  | Antipsychotic             | 51940-78-4  |      | C <sub>16</sub> H <sub>22</sub> ClN <sub>3</sub> O                                          |
| Zidamide                    | Antihypertensive          | 75820-08-5  |      | C <sub>16</sub> H <sub>16</sub> ClN <sub>3</sub> O <sub>3</sub> S                           |
| Zidometacin                 | Antiinflammatory          | 62851-43-8  |      | C <sub>19</sub> H <sub>16</sub> N <sub>4</sub> O <sub>4</sub>                               |
| Zidovudine                  | Antiviral                 | 30516-87-1  |      | C <sub>10</sub> H <sub>13</sub> N <sub>5</sub> O <sub>4</sub>                               |
| Zifrosilone                 | Antidote                  | 132236-18-1 |      | C <sub>11</sub> H <sub>13</sub> F <sub>3</sub> OSi                                          |
| Zilantel                    | Anthelminthic             | 22012-72-2  |      | C <sub>26</sub> H <sub>38</sub> N <sub>2</sub> O <sub>6</sub> P <sub>2</sub> S <sub>4</sub> |
| Zileuton                    | Antiinflammatory          | 111406-87-2 |      | C <sub>11</sub> H <sub>12</sub> N <sub>2</sub> O <sub>2</sub> S                             |
| Zilpaterol                  | Bronchodilator            | 119520-05-7 |      | C <sub>14</sub> H <sub>19</sub> N <sub>3</sub> O <sub>2</sub>                               |
| Zimeldine                   | Antidepressant            | 56775-88-3  |      | C <sub>16</sub> H <sub>17</sub> BrN <sub>2</sub>                                            |
| Zimidoben                   | Unclassified              | 90697-56-6  |      | C <sub>12</sub> H <sub>12</sub> N <sub>2</sub> O <sub>2</sub>                               |
| Zindotrine                  | Bronchodilator            | 56383-05-2  |      | C <sub>11</sub> H <sub>15</sub> N <sub>5</sub>                                              |
| Zindoxifene                 | Antineoplastic            | 86111-26-4  |      | C <sub>21</sub> H <sub>21</sub> NO <sub>4</sub>                                             |
| Zinoconazole                | Antifungal                | 84697-21-2  |      | C <sub>15</sub> H <sub>11</sub> Cl <sub>3</sub> N <sub>4</sub> S                            |
| Zinterol                    | Bronchodilator            | 37000-20-7  |      | C <sub>19</sub> H <sub>26</sub> N <sub>2</sub> O <sub>4</sub> S                             |
| Zinviroxime                 | Antiviral                 | 72301-78-1  |      | C <sub>17</sub> H <sub>18</sub> N <sub>4</sub> O <sub>3</sub> S                             |
| Zipeprol                    | Antitussive               | 34758-83-3  |      | C <sub>23</sub> H <sub>32</sub> N <sub>2</sub> O <sub>3</sub>                               |
| Ziprasidone                 | Antipsychotic             | 146939-27-7 | Y    | C <sub>21</sub> H <sub>21</sub> ClN <sub>4</sub> OS                                         |
| Zocainone                   | Unclassified              | 68876-74-4  |      | C <sub>22</sub> H <sub>27</sub> NO <sub>3</sub>                                             |
| Zofenopril Calcium          | Antihypertensive          | 81872-10-8  | Y    | C <sub>22</sub> H <sub>23</sub> NO <sub>4</sub> S <sub>2</sub>                              |
| Zofenoprilat Arginine       | Antihypertensive          | 75176-37-3  |      | C <sub>15</sub> H <sub>19</sub> NO <sub>5</sub> S <sub>2</sub>                              |
| Zoficonazole                | Antifungal                | 71097-23-9  |      | C <sub>20</sub> H <sub>19</sub> Cl <sub>3</sub> N <sub>2</sub> O <sub>2</sub>               |
| Zolamine                    | Antihistaminic            | 553-13-9    |      | C <sub>15</sub> H <sub>21</sub> N <sub>3</sub> OS                                           |
| Zolasartan                  | Antihypertensive          | 145781-32-4 |      | C <sub>24</sub> H <sub>20</sub> BrClN <sub>6</sub> O <sub>3</sub>                           |
| Zolazepam                   | Sedative                  | 31352-82-6  |      | C <sub>15</sub> H <sub>15</sub> FN <sub>4</sub> O                                           |
| Zoledronic Acid             | Bone Resorption Inhibitor | 118072-93-8 |      | C <sub>5</sub> H <sub>10</sub> N <sub>2</sub> O <sub>7</sub> P <sub>2</sub>                 |
| Zolenzepine                 | Antiulcerative            | 78208-13-6  |      | C <sub>19</sub> H <sub>24</sub> N <sub>6</sub> O <sub>2</sub>                               |
| Zolertine                   | Vasodilator               | 4004-94-8   |      | C <sub>13</sub> H <sub>18</sub> N <sub>6</sub>                                              |
| Zolimidine                  | Antiulcerative            | 1222-57-7   |      | C <sub>14</sub> H <sub>12</sub> N <sub>2</sub> O <sub>2</sub> S                             |
| Zoliprofen                  | Antiinflammatory          | 56355-17-0  |      | C <sub>12</sub> H <sub>11</sub> NO <sub>3</sub> S                                           |
| Zolmitriptan                | Antimigraine              | 139264-17-8 | Y    | C <sub>16</sub> H <sub>21</sub> N <sub>3</sub> O <sub>2</sub>                               |
| Zoloperone                  | Antipsychotic             | 52867-74-0  |      | C <sub>22</sub> H <sub>24</sub> FN <sub>3</sub> O <sub>3</sub>                              |
| Zolpidem                    | Sedative                  | 82626-48-0  | Y    | C <sub>19</sub> H <sub>21</sub> N <sub>3</sub> O                                            |
| Zomebazam                   | Anxiolytic                | 78466-70-3  |      | C <sub>15</sub> H <sub>16</sub> N <sub>4</sub> O <sub>2</sub>                               |
| Zomepirac                   | Analgesic                 | 33369-31-2  |      | C <sub>15</sub> H <sub>14</sub> ClNO <sub>3</sub>                                           |
| Zometapine                  | Antidepressant            | 51022-73-2  |      | C <sub>14</sub> H <sub>15</sub> ClN <sub>4</sub>                                            |
| Zonampanel                  | Antidepressant            | 210245-80-0 |      | C <sub>13</sub> H <sub>9</sub> N <sub>5</sub> O <sub>6</sub>                                |
| Zoniclezole                 | Anticonvulsant            | 121929-20-2 |      | C <sub>12</sub> H <sub>10</sub> ClN <sub>3</sub> O                                          |
| Zoniporide                  | Cardiotonic               | 241800-98-6 |      | C <sub>17</sub> H <sub>16</sub> N <sub>6</sub> O                                            |
| Zonisamide                  | Anticonvulsant            | 68291-97-4  |      | C <sub>8</sub> H <sub>8</sub> N <sub>2</sub> O <sub>3</sub> S                               |
| Zopiclone                   | Sedative                  | 43200-80-2  |      | C <sub>17</sub> H <sub>17</sub> ClN <sub>6</sub> O <sub>3</sub>                             |
| Zopolrestat                 | Antidiabetic              | 110703-94-1 |      | C <sub>19</sub> H <sub>12</sub> F <sub>3</sub> N <sub>3</sub> O <sub>3</sub> S              |
| Zorubicin                   | Antineoplastic            | 54083-22-6  |      | C <sub>34</sub> H <sub>35</sub> N <sub>3</sub> O <sub>10</sub>                              |
| Zosuquidar Trihydrochloride | Antineoplastic            | 167354-41-8 |      | C <sub>32</sub> H <sub>31</sub> F <sub>2</sub> N <sub>3</sub> O <sub>2</sub>                |
| Zotepine                    | Antipsychotic             | 26615-21-4  |      | C <sub>18</sub> H <sub>18</sub> ClNOS                                                       |
| Zoticasone                  | Antiinflammatory          | 678160-57-1 |      | C <sub>25</sub> H <sub>30</sub> F <sub>2</sub> O <sub>6</sub> S                             |
| Zoxazolamine                | Uricosuric                | 61-80-3     |      | C <sub>7</sub> H <sub>5</sub> ClN <sub>2</sub> O                                            |
| Zucapsaicin                 | Analgesic                 | 25775-90-0  |      | C <sub>18</sub> H <sub>27</sub> NO <sub>3</sub>                                             |
| Zuclomiphene                | Pituitary                 | 15690-55-8  |      | C <sub>26</sub> H <sub>28</sub> ClNO                                                        |
| Zuclopenthixol              | Antipsychotic             | 53772-83-1  |      | C <sub>22</sub> H <sub>25</sub> ClN <sub>2</sub> OS                                         |
| Zylofuramine                | Antidiabetic              | 3563-92-6   |      | C <sub>14</sub> H <sub>21</sub> NO                                                          |
| Cetyl Myristate             | Dermatologic              | 2599-01-1   |      | C <sub>30</sub> H <sub>60</sub> O <sub>2</sub>                                              |
| Cetyl Myristoleate          | Dermatologic              | 64660-84-0  |      | C <sub>30</sub> H <sub>58</sub> O <sub>2</sub>                                              |
| Emtricitabine               | Antineoplastic            | 143491-57-0 | Y    | C <sub>8</sub> H <sub>10</sub> FN <sub>3</sub> O <sub>3</sub> S                             |
| Metaraminol                 | Antihypotensive           | 54-49-9     |      | C <sub>9</sub> H <sub>13</sub> NO <sub>2</sub>                                              |

“Y” represented the drug was administered orally.
